# Supplementary material for: Evidence-Based Translation for the Genomic Responses of Murine Models for the Study of Human Immunity
Source: PubMed Central journal article supplement (PMC4332676; doi:10.1371/journal.pone.0118017), 2015-02-13
Supplement: pone.0118017.s001.pdf [file pone.0118017.s001.pdf]

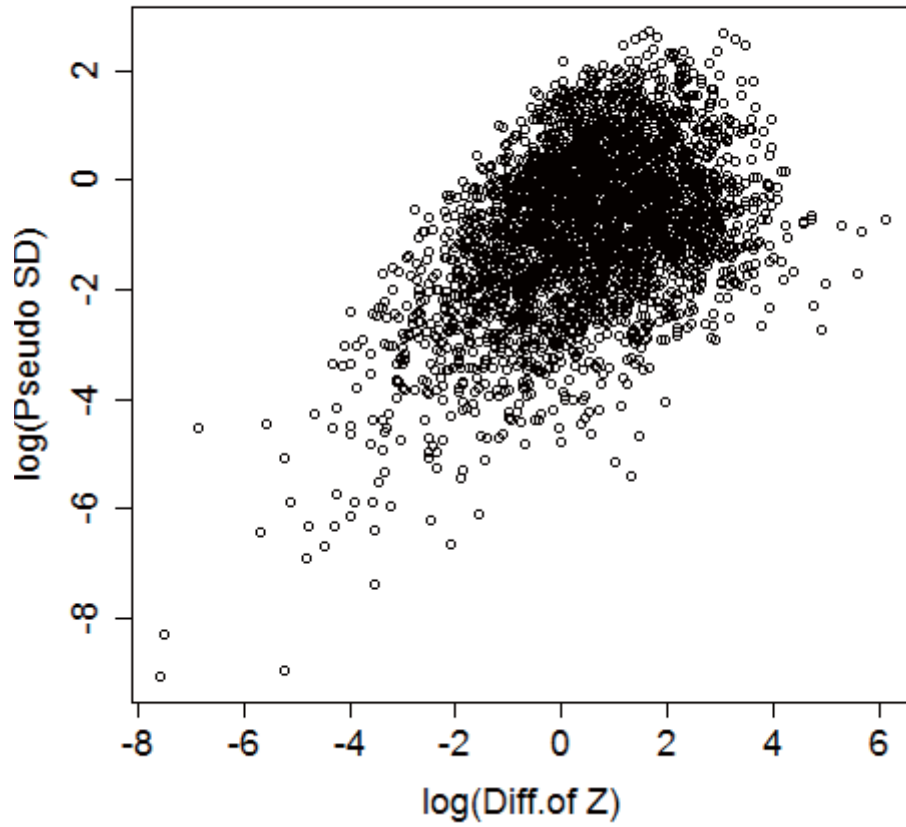

**Figure S1.** A scatter plot of the estimated pseudo variances and the difference of modified z-scores in the training experiments.
