# Supplementary material for: Evidence-Based Translation for the Genomic Responses of Murine Models for the Study of Human Immunity
Source: PubMed Central journal article supplement (PMC4332676; doi:10.1371/journal.pone.0118017), 2015-02-13
Supplement: pone.0118017.s003.pdf [file pone.0118017.s003.pdf]

**Table S1. Calculated pseudo variances in the tested data sets.**

The averages of pseudo variances of training sets in each data set of Table 1 are shown. If a gene is not measured in a data set, its pseudo variance is noted as NA.

| Gene     | GSE19492 | GSE33341 | GSE16387 | GSE48200 | GlueGrant |
|----------|----------|----------|----------|----------|-----------|
| A1bg     | 1.81     | NA       | NA       | NA       | NA        |
| A1cf     | NA       | 1.55     | 0        | 2.41     | 1.11      |
| A2bp1    | 0.39     | NA       | NA       | NA       | 1.71      |
| A2ld1    | NA       | NA       | NA       | NA       | 0         |
| A2m      | 0        | 0.39     | 0        | 2.16     | NA        |
| A4galt   | NA       | 2.83     | 0.94     | 1.08     | 0         |
| A4gnt    | NA       | 0.15     | 0        | 1.71     | 3.05      |
| Aaas     | 0.26     | 0        | 2.74     | 0.22     | 0         |
| Aacs     | 0.48     | 1.68     | 1.86     | 0.03     | 0         |
| Aadac    | 4.16     | 4.21     | 1.9      | 4.04     | 3.82      |
| Aadacl2  | NA       | NA       | NA       | 3.9      | NA        |
| Aadat    | 0.22     | NA       | 3.99     | 5.71     | 1.39      |
| Aaed1    | NA       | NA       | 0.96     | 1.47     | NA        |
| Aagab    | NA       | 1.46     | 1.05     | 2.65     | 2.75      |
| Aak1     | NA       | 0.19     | 0.98     | 1.81     | 0.49      |
| Aamdc    | NA       | 1.66     | 1.23     | NA       | NA        |
| Aamp     | 0.02     | 1.65     | 0.46     | 0.8      | 0         |
| Aanat    | 1.38     | 1.96     | 0        | 1.68     | 0         |
| Aar2     | NA       | 1.3      | 1.18     | 6.3      | NA        |
| Aard     | NA       | NA       | NA       | 0.95     | NA        |
| Aars     | 0.56     | 2.15     | 0.37     | 4.82     | 1.93      |
| Aars2    | NA       | NA       | 2.33     | 0        | 0         |
| Aarsd1   | NA       | 1.38     | 0.3      | NA       | 2.5       |
| Aasdh    | NA       | NA       | 1.33     | 0.64     | 0         |
| Aasdhppt | 0.28     | 0.77     | 1.2      | NA       | 0         |
| Aass     | 0.34     | 1.46     | 2.88     | 1.04     | 0.57      |
| Aatf     | 0.48     | 1.9      | 0.38     | 1.68     | 0         |
| Aatk     | 0.57     | 2.47     | 3.99     | 1.1      | 0         |
| Abat     | 0.45     | 0.24     | 1.58     | 0        | 0.17      |
| Abca1    | 0        | 0        | 1.96     | 0        | 0         |
| Abca12   | 0.89     | 0.11     | 2.22     | 1.76     | 0         |
| Abca13   | 1.5      | NA       | 0.09     | 0.28     | NA        |
| Abca2    | 0.58     | 2.9      | 2.29     | 0.02     | 0         |
| Abca3    | 0.4      | 1.29     | 1.42     | 0.82     | 1.88      |
| Abca4    | 0        | 2.13     | 1.67     | 20.86    | 3.84      |
| Abca5    | 0.11     | 0.13     | 1.14     | 0.27     | 0.87      |

|         |      |      |      |      |      |
|---------|------|------|------|------|------|
| Abca6   | 0.65 | 2.34 | 0.27 | 0.61 | 3.1  |
| Abca7   | 0.75 | 1.59 | 0.5  | 0.04 | 0    |
| Abca8   | 2.47 | NA   | NA   | NA   | NA   |
| Abca9   | 0.52 | NA   | 0.06 | 0.26 | 2.32 |
| Abcb10  | 0.37 | NA   | 3.61 | 0.68 | 0    |
| Abcb11  | 1.63 | 1.64 | 0    | 1.45 | 1.54 |
| Abcb4   | 0.03 | 0    | 2.89 | 2.74 | 1.84 |
| Abcb5   | NA   | NA   | NA   | 0.49 | NA   |
| Abcb6   | 0.26 | 2.07 | 2.71 | 0    | 1.2  |
| Abcb7   | 0.61 | 0    | 0.3  | 2.01 | 0    |
| Abcb8   | NA   | 1.81 | 0.43 | 1    | 0    |
| Abcb9   | 0.94 | 1    | 0.61 | 0.31 | 0    |
| Abcc1   | 0.46 | 1.59 | 1.21 | 0    | 0.39 |
| Abcc10  | 0    | 0    | 0.33 | 0    | 0    |
| Abcc12  | 0    | NA   | 0.37 | 1.44 | NA   |
| Abcc2   | 1.16 | 3.33 | 1.74 | 0    | 2.91 |
| Abcc3   | 0.71 | 1.49 | 3.32 | 1.27 | 2.19 |
| Abcc4   | 0.18 | 1.49 | 1.91 | 0    | 0    |
| Abcc5   | 0    | 0    | 1.25 | 0.22 | 0    |
| Abcc6   | 0.96 | 1.12 | 1.24 | 1.03 | 1.5  |
| Abcc8   | 0.38 | 1.18 | 0.87 | 1.24 | 8.25 |
| Abcc9   | 0.39 | 0.64 | 0.66 | 4.71 | 1.75 |
| Abcd1   | 1.07 | 2.15 | 2.74 | 0    | 3.08 |
| Abcd2   | 2.03 | 1.47 | 2.44 | 0.14 | 0.39 |
| Abcd3   | 0    | 0.35 | 0.29 | 0.55 | 0    |
| Abcd4   | 0    | 0    | 1.73 | 0.07 | 0    |
| Abce1   | 0.49 | 0.96 | 0.63 | 0.63 | 0    |
| Abcf1   | 0.82 | 0.5  | 0.37 | 0    | 0.82 |
| Abcf2   | 0    | 0    | 0.91 | 1.79 | 1.66 |
| Abcf3   | 0.47 | 0    | 0.26 | 1.94 | 0    |
| Abcg1   | 0.59 | 1.68 | 2.28 | 0.89 | 2.84 |
| Abcg2   | 1.79 | 1.77 | 1.58 | 0.1  | 2.13 |
| Abcg4   | 0.67 | 0.53 | 0.78 | 2.04 | 2.94 |
| Abcg5   | 0    | 2.46 | 2.67 | 1.7  | 1.28 |
| Abcg8   | 1.02 | NA   | 6.31 | 0.65 | 1.48 |
| Abhd1   | 0.88 | NA   | 2.35 | 0.36 | 0    |
| Abhd10  | NA   | 0.92 | 0.82 | 1.02 | 0    |
| Abhd11  | NA   | 2.9  | 0.69 | 2.22 | 0    |
| Abhd12  | NA   | NA   | 0.68 | 0.93 | 0    |
| Abhd12b | NA   | NA   | NA   | 3.15 | NA   |
| Abhd13  | NA   | NA   | 1.73 | 0.12 | 1.92 |

|         |      |      |      |      |      |
|---------|------|------|------|------|------|
| Abhd14a | NA   | 0    | 1.92 | 0.47 | 1.94 |
| Abhd14b | NA   | NA   | 2.15 | 1.85 | 0    |
| Abhd15  | NA   | NA   | 1.19 | 1.49 | 0    |
| Abhd16a | NA   | NA   | 1.4  | 2.08 | NA   |
| Abhd16b | NA   | NA   | 0.89 | 2.07 | NA   |
| Abhd17a | NA   | 0.24 | 2.29 | 0.01 | NA   |
| Abhd17b | NA   | 0.34 | 0.6  | 1.46 | NA   |
| Abhd17c | NA   | NA   | 1.67 | 0.89 | NA   |
| Abhd2   | 0.37 | 0.57 | 1.93 | 0    | 0    |
| Abhd3   | 1.01 | 1.07 | 0.19 | 1.79 | 1.13 |
| Abhd4   | 0    | 1.96 | 2.57 | 0.14 | 1.25 |
| Abhd5   | 0.3  | 0.58 | 0.61 | 2.52 | 1.48 |
| Abhd6   | 1.1  | 0    | 1.85 | 2.12 | 0.63 |
| Abhd8   | 0    | 3.33 | 2.04 | 1.01 | 0    |
| Abhd9   | 0.06 | NA   | NA   | NA   | NA   |
| Abi1    | 0    | 0.9  | 1.42 | 1.24 | 0    |
| Abi2    | 0    | 0.21 | 0.63 | 1.66 | 0    |
| Abi3    | 0.44 | NA   | 1.32 | 3.24 | 0.12 |
| Abi3bp  | NA   | 0.67 | 0.45 | 1.89 | 0    |
| Abl1    | 0.44 | 0    | 1.54 | 6.58 | 1.59 |
| Abl2    | 0    | 1.51 | 0.61 | 1.27 | 1.28 |
| Ablim1  | 0    | 0    | 1.43 | 0.68 | 2.11 |
| Ablim2  | 0    | NA   | 1.16 | 1.29 | 0    |
| Ablim3  | NA   | 0    | 0.85 | 4.01 | 0    |
| Abo     | 2.56 | 1.72 | 0.65 | 8.48 | 0    |
| Abp1    | 1.25 | 2.62 | 0    | 0.99 | 1.82 |
| Abr     | 0    | 2.45 | 4.08 | 0    | 0    |
| Abra    | NA   | NA   | 1.25 | 1.06 | NA   |
| Abracl  | NA   | NA   | 1.84 | 0.64 | NA   |
| Abt1    | 2.66 | 1.93 | 0.06 | 1.24 | 0    |
| Abtb1   | 0.16 | NA   | 2.95 | 0.14 | 1.09 |
| Abtb2   | NA   | 3.73 | 3.24 | 1.76 | 0.26 |
| Acaa1   | 0.64 | NA   | NA   | NA   | NA   |
| Acaa2   | 0.13 | 1.64 | 0.68 | 1.75 | 0.74 |
| Acaca   | NA   | 0.36 | 0.26 | 0    | 0    |
| Acacb   | 1.53 | 0    | 0.96 | 0    | 0    |
| Acad10  | NA   | 1.32 | 1.2  | 0.53 | 0    |
| Acad11  | NA   | NA   | 1.33 | NA   | NA   |
| Acad8   | 0.34 | 1.42 | 0.89 | 0.68 | 0    |
| Acad9   | 0.15 | NA   | 0.54 | 0.89 | 0    |
| Acadl   | 0.78 | 1.25 | 0.95 | 2.97 | 0    |

|        |      |      |      |       |      |
|--------|------|------|------|-------|------|
| Acadm  | 0    | 1.09 | 1.65 | 1.59  | 0    |
| Acads  | 0.04 | 1.09 | 0.56 | 0     | 1.2  |
| Acadsb | 1.88 | 2.82 | 1.18 | 2.01  | 1.8  |
| Acadv1 | 2.12 | 0.57 | 0.21 | NA    | 2.52 |
| Acan   | NA   | 0.43 | 0.58 | 2.28  | 0    |
| Acap1  | NA   | 2.74 | 0.49 | NA    | 0    |
| Acap2  | NA   | 0    | 1.07 | 0     | 0.83 |
| Acap3  | NA   | NA   | 0.63 | 2.6   | 0    |
| Acat1  | 1.97 | 2.62 | 1.08 | 1.26  | 0    |
| Acat2  | 0.09 | 0.32 | 1.72 | NA    | 0.64 |
| Acbd3  | 2.96 | 0.73 | 1.1  | 0.01  | 3.16 |
| Acbd4  | 1.28 | 0.61 | 2.39 | 1.11  | 1.02 |
| Acbd5  | 0.86 | NA   | 0.95 | 0.39  | 0    |
| Acbd6  | 0    | NA   | 1.12 | 2.13  | 1.55 |
| Acbd7  | NA   | NA   | NA   | 3.2   | NA   |
| Accn1  | 0.7  | NA   | NA   | NA    | 0    |
| Accn2  | 2.73 | NA   | NA   | NA    | 4.26 |
| Accn3  | 0.34 | NA   | NA   | NA    | 2.7  |
| Accn4  | 2.68 | NA   | NA   | NA    | 0    |
| Accn5  | 2.13 | NA   | NA   | NA    | NA   |
| Accs   | NA   | NA   | 2.29 | 1.62  | 0.45 |
| Accsl  | NA   | NA   | NA   | 0.42  | NA   |
| Acd    | NA   | 0    | 3.5  | 17.62 | 0    |
| Ace    | 0    | 2.67 | 0.91 | 2.91  | 1.6  |
| Ace2   | 1.25 | 0.31 | 0.85 | 13.72 | 1.8  |
| Acer1  | NA   | NA   | 0    | 0     | NA   |
| Acer2  | NA   | NA   | NA   | 0     | NA   |
| Acer3  | NA   | NA   | 1.87 | 0.63  | 2.66 |
| Ache   | 0.34 | 2.41 | 0.33 | 2.04  | 1.55 |
| Acin1  | 0.24 | 0.4  | 3.51 | 2.72  | 0.16 |
| Acly   | 0.65 | 0.91 | 0.19 | 0.84  | 0    |
| Acmsd  | 2.93 | NA   | NA   | 3.61  | NA   |
| Acn9   | 0    | 0.88 | 1.75 | 1.44  | 1.04 |
| Aco1   | 0.03 | 0    | 1.01 | 0     | 2.21 |
| Aco2   | 0    | 1.73 | 0.49 | 0     | 0    |
| Acot1  | NA   | 0    | 0.1  | 2.97  | NA   |
| Acot11 | NA   | 0.76 | 1.2  | NA    | 2.23 |
| Acot12 | NA   | NA   | 0.54 | 0     | 0.56 |
| Acot13 | NA   | 4.49 | 2.05 | 1.3   | 0    |
| Acot2  | NA   | NA   | NA   | 3.38  | NA   |
| Acot4  | NA   | NA   | 1.84 | 0.69  | 1.3  |

|        |      |      |      |      |      |
|--------|------|------|------|------|------|
| Acot6  | NA   | NA   | 3.08 | 0    | 0    |
| Acot7  | NA   | 1.61 | 1.2  | 1.46 | 0    |
| Acot8  | NA   | 0    | 1.1  | 0    | 0.93 |
| Acot9  | NA   | 0    | 3    | 1.42 | 0.31 |
| Acox1  | 0.37 | 1.42 | 0.86 | 0    | 1.18 |
| Acox2  | 6.49 | 2.9  | 1.85 | 0.77 | 1.59 |
| Acox3  | 2.45 | 0.4  | 1.05 | 0.53 | 0.6  |
| Acox1  | 1.66 | 2.54 | 1.97 | 0.94 | 0    |
| Acp1   | 0    | 1.29 | 0.09 | 0.98 | 0    |
| Acp2   | 0.12 | 0.89 | 1.88 | NA   | 3.38 |
| Acp5   | 0    | 0.03 | 2.45 | 0    | 4.88 |
| Acp6   | 0.42 | 1.15 | 0.89 | 1.42 | 0    |
| Acpl2  | NA   | NA   | 1.6  | 1.84 | 1.85 |
| Acpp   | 0    | 0.22 | 0.44 | 1.46 | 0.64 |
| Acpt   | NA   | NA   | NA   | 1.08 | NA   |
| Acr    | 2.24 | 2.27 | 0.23 | 0.77 | NA   |
| Acrbp  | 0    | NA   | 1    | 0    | 2.37 |
| Acrv1  | 0.35 | 1.24 | 0.79 | 3.05 | 0.04 |
| Acsbg1 | NA   | 1.51 | 2.15 | 3.31 | 5.69 |
| Acsbg2 | NA   | 1.88 | 5.49 | 0.79 | 0    |
| Acsf2  | NA   | 0    | 0    | 0.15 | 0    |
| Acsf3  | NA   | NA   | 0.16 | 0    | 0.57 |
| Acs11  | 0.07 | 3    | 1.39 | 1.29 | 2.59 |
| Acs13  | 0.19 | 1.43 | 0.79 | NA   | 0    |
| Acs14  | 0.2  | 0.24 | 2.62 | 0.22 | 0    |
| Acs15  | 1.38 | 2.49 | 1.12 | 0.32 | 0    |
| Acs16  | 1.72 | 0    | 0.03 | 0.85 | 0.1  |
| Acsm1  | NA   | 1.97 | 1.81 | 2.86 | 0.88 |
| Acsm3  | NA   | 0.32 | 0.81 | NA   | 0.42 |
| Acsm5  | NA   | 1.1  | 0.3  | 0.5  | 0    |
| Acss1  | NA   | NA   | 0.16 | 0.2  | 1.32 |
| Acss2  | NA   | NA   | 1.33 | 1.84 | 0    |
| Acss3  | NA   | NA   | NA   | 1.05 | NA   |
| Acta1  | NA   | 1.35 | 2.79 | 0.15 | 3.39 |
| Acta2  | 0    | 0    | 1.85 | 1.92 | 0.01 |
| Actb   | 0.25 | 1.83 | 1.32 | 1.29 | 0.65 |
| Actbl2 | NA   | NA   | NA   | 3.8  | NA   |
| Actc1  | 0    | 1.37 | 2.72 | 0.04 | NA   |
| Actg1  | 0.1  | 2.25 | 2.56 | 1.4  | 0.68 |
| Actg2  | 4.02 | 1.69 | 2.18 | 2.92 | 0.93 |
| Actl10 | NA   | NA   | 0.83 | 0.92 | NA   |

|        |      |      |      |      |      |
|--------|------|------|------|------|------|
| Actl6a | 0    | 1.78 | 0.94 | 0.54 | 0    |
| Actl6b | NA   | 1.43 | 0.65 | 0.49 | 0    |
| Actl7a | 2.58 | 2.52 | 1.68 | 3    | 0    |
| Actl7b | 0    | 3.85 | 0.5  | 0.74 | 0    |
| Actl9  | NA   | NA   | 0    | 1.94 | 0    |
| Actn1  | 0.57 | 0.48 | 2.18 | 1.13 | 0.16 |
| Actn2  | 7.24 | 0.56 | 0.9  | 1.57 | 0    |
| Actn3  | 1.19 | 0.94 | 0.73 | 2.3  | 0.99 |
| Actn4  | 0.77 | 0    | 1.05 | 0    | 1.15 |
| Actr10 | 0.3  | 2.11 | 1.81 | 1.15 | 0.98 |
| Actr1a | 0.81 | 0.53 | 0.69 | 0    | 0    |
| Actr1b | 0.15 | 0    | 1.7  | 3.88 | 0    |
| Actr2  | 0    | 0.83 | 1.16 | 1.52 | 0.3  |
| Actr3  | 0.24 | 0.31 | 2.84 | 1.63 | 0    |
| Actr3b | NA   | 0    | 1.87 | 5.99 | 0    |
| Actr5  | 0    | 0    | 0.64 | 2.09 | 1.49 |
| Actr6  | 0.97 | 1.89 | 1.71 | 0.58 | 0    |
| Actr8  | 0    | 0    | 0    | 0    | 0    |
| Actrt1 | 1.72 | NA   | NA   | 0    | NA   |
| Actrt2 | NA   | NA   | 1.06 | 2.82 | 1.17 |
| Actrt3 | NA   | NA   | 0.67 | 0    | NA   |
| Acvr1  | 0    | 1.67 | 1.4  | 1.11 | 0    |
| Acvr1b | 0.34 | 0.24 | 1.07 | 0    | 0    |
| Acvr1c | 4.19 | NA   | 0.68 | 3.32 | NA   |
| Acvr2a | NA   | 3.66 | 0    | 2.31 | 0    |
| Acvr2b | 0    | 1.37 | 0.3  | 0.16 | 0    |
| Acvr1l | 0.94 | 1.26 | 1.46 | 2.54 | 0.03 |
| Acy1   | 0.08 | NA   | 1.78 | 0.62 | 0.84 |
| Acy3   | 0.05 | NA   | 3.14 | 5.43 | 0.72 |
| Acyp1  | 4.95 | 0    | 0    | 9.31 | 2.11 |
| Acyp2  | 5.44 | 0.73 | 2.6  | 3.34 | 0    |
| Ada    | 0.52 | 1.18 | 2.1  | 0.23 | 0    |
| Adad1  | NA   | NA   | 0.4  | 0.36 | 3.84 |
| Adad2  | NA   | NA   | 3.29 | 1.55 | 1.74 |
| Adal   | NA   | NA   | 1.1  | 0.67 | 0.95 |
| Adam10 | 0.27 | 1.45 | 1.56 | 0.07 | 0    |
| Adam11 | 0.11 | 1.58 | 0.67 | 1.44 | 1.44 |
| Adam12 | 0.93 | 0.13 | 1.05 | 2.56 | 0    |
| Adam15 | 1.27 | 1.17 | 0.9  | 1.79 | 1.5  |
| Adam17 | 0    | 0    | 2.51 | 0.83 | 0.04 |
| Adam18 | 1.47 | 0    | 0    | 0.74 | 0    |

|          |      |      |      |      |      |
|----------|------|------|------|------|------|
| Adam19   | 0    | 2.05 | 0.55 | 0    | NA   |
| Adam1a   | NA   | NA   | 0.61 | NA   | NA   |
| Adam2    | 1.02 | 0.98 | 3.07 | 0.53 | 4.45 |
| Adam20   | NA   | NA   | NA   | 0    | NA   |
| Adam21   | 1.84 | NA   | 1.27 | 1.36 | NA   |
| Adam22   | 0.47 | 0.56 | 1.21 | 0.91 | 0    |
| Adam23   | 1.39 | 1.36 | 0.4  | 1.02 | 3.16 |
| Adam28   | 0.01 | 0.87 | 0.76 | 1.01 | 0.33 |
| Adam29   | NA   | NA   | NA   | 2.32 | NA   |
| Adam30   | 0.77 | NA   | NA   | 0.07 | NA   |
| Adam32   | 1.09 | NA   | 1.31 | 0    | NA   |
| Adam33   | 1.48 | NA   | 0    | 0.47 | 0.08 |
| Adam5    | 0    | 2.17 | 0.85 | 0.39 | NA   |
| Adam6    | 0    | NA   | NA   | NA   | NA   |
| Adam7    | 2.61 | 2.3  | 1.54 | 0.47 | 0    |
| Adam8    | 1.68 | 2.07 | 0.47 | 0.79 | 0    |
| Adam9    | 3.24 | 0.45 | 2.61 | 0    | 1.7  |
| Adamdec1 | 0.54 | 0.75 | 0.11 | 0.74 | 2.01 |
| Adamts1  | 0.09 | 1.21 | 1.53 | 1.88 | 1.35 |
| Adamts10 | 0.57 | NA   | 1.23 | 1.07 | 0.94 |
| Adamts12 | 1.01 | 2.25 | 1.46 | 1.83 | 1.98 |
| Adamts13 | 0    | NA   | NA   | 0.75 | NA   |
| Adamts14 | NA   | NA   | NA   | 0    | NA   |
| Adamts15 | NA   | NA   | 2.06 | 0.2  | NA   |
| Adamts16 | 0.47 | NA   | 0.47 | 0.52 | 0    |
| Adamts17 | NA   | NA   | NA   | 0.46 | NA   |
| Adamts18 | 0.61 | NA   | 0    | 3.06 | 0    |
| Adamts19 | 0.9  | NA   | 1.58 | 0.37 | NA   |
| Adamts2  | 0    | 0.34 | 1.01 | 0    | 1.87 |
| Adamts20 | 0.91 | 0.46 | 0.87 | 0    | 1.95 |
| Adamts3  | NA   | 0.01 | 2.3  | 0    | 0    |
| Adamts4  | 0    | NA   | 1.21 | 1.13 | NA   |
| Adamts5  | 0.85 | 1.86 | 0.65 | 3.44 | 1.18 |
| Adamts6  | 2.42 | 3.65 | 0.9  | 0.52 | 1.36 |
| Adamts7  | NA   | 3.86 | 0.71 | 0.45 | 4.54 |
| Adamts8  | 1.16 | 0.33 | 1.38 | 0.12 | NA   |
| Adamts9  | 0.42 | 1.41 | 0.39 | 0    | 2.87 |
| Adamtsl1 | 0.76 | NA   | 0.74 | 0.63 | 0.92 |
| Adamtsl2 | NA   | 0    | 0.41 | 1.26 | 1.82 |
| Adamtsl3 | NA   | 0.08 | 0.53 | 0    | 2.54 |
| Adamtsl4 | NA   | 0.03 | 2.74 | 0.99 | 1.36 |

|           |      |      |      |      |      |
|-----------|------|------|------|------|------|
| Adamts15  | NA   | NA   | 1.7  | 1.35 | 0    |
| Adap1     | NA   | 0.89 | 1.35 | 0.95 | 1.62 |
| Adap2     | NA   | 0    | 2    | 1.02 | 1.24 |
| Adar      | 2.4  | 1.41 | 1.35 | 0    | 0    |
| Adarb1    | 0.85 | 0    | 1.2  | 0    | 0.68 |
| Adarb2    | 1.04 | 1.33 | 0.16 | 1.54 | 0    |
| Adat1     | 1.35 | 0    | 1.36 | 1.66 | 1.68 |
| Adat2     | NA   | NA   | 1.18 | 1.35 | 0.13 |
| Adat3     | NA   | NA   | 0.55 | 1.73 | 0.54 |
| Adc       | NA   | NA   | 0.53 | 0.58 | 0    |
| Adck1     | 0    | NA   | 0.34 | 1.02 | 3.48 |
| Adck2     | 0    | 0    | 0.58 | 0.97 | 1.57 |
| Adck3     | NA   | 0    | 0.54 | 0.69 | NA   |
| Adck4     | 1.22 | 1.24 | 0.82 | 0    | 0.63 |
| Adck5     | 0.74 | NA   | 1.99 | 0    | 1.26 |
| Adcy1     | 0.75 | 0.72 | 0.26 | 1.06 | 2.27 |
| Adcy10    | NA   | 1.04 | 0.74 | 0    | 0    |
| Adcy2     | 1.5  | 1.08 | 1.86 | 1.54 | 6.56 |
| Adcy3     | 0.37 | 1.56 | 1.3  | 0    | 0.12 |
| Adcy4     | 1.77 | NA   | 1.32 | 1.59 | 3.35 |
| Adcy5     | 0.47 | NA   | 0.63 | 1.9  | 2.3  |
| Adcy6     | 0.44 | 4.52 | 1.18 | 1.62 | 0    |
| Adcy7     | 0    | 0.23 | 0.79 | 0    | 0    |
| Adcy8     | 4.03 | 2.03 | 0    | 3.33 | 0.26 |
| Adcy9     | 0.25 | 0    | 0.53 | 1.33 | 0.51 |
| Adcyap1   | 1.46 | 0.85 | 0.82 | 0.44 | 1.23 |
| Adcyap1r1 | 0.66 | 1.61 | 0.74 | 0.29 | 1.72 |
| Add1      | 1.25 | 0    | 0.93 | 0.61 | 0.49 |
| Add2      | 0    | 0.6  | 0.04 | 0.73 | 0    |
| Add3      | 0.64 | 0.22 | 1.66 | 0.84 | 0    |
| Adfp      | 0.2  | NA   | NA   | NA   | NA   |
| Adgb      | NA   | 1.4  | 0.68 | 2.43 | NA   |
| Adh4      | 0.78 | NA   | 0.05 | 0    | 3.47 |
| Adh5      | 0    | 0.35 | 1.39 | 0.82 | 0    |
| Adh7      | NA   | 1.41 | 1.07 | 2.5  | 2.43 |
| Adhfe1    | 0.02 | NA   | 0.62 | 0    | 1.6  |
| Adi1      | NA   | 0.18 | 2.81 | 0.38 | 0    |
| Adig      | NA   | NA   | 0.19 | 1.98 | NA   |
| Adipoq    | NA   | 1.22 | 0    | 2.53 | 0    |
| Adipor1   | 0.14 | 0.34 | 5.05 | 0.24 | 1.37 |
| Adipor2   | 0.06 | 0.38 | 1.09 | 4.1  | 3.95 |



|         |      |      |      |      |      |
|---------|------|------|------|------|------|
| Adk     | 0    | 0    | 1.01 | 1.18 | 0    |
| Adm     | 0    | 0    | 2.86 | 1.13 | 0    |
| Adm2    | 1.25 | 1.93 | 2.45 | 1.08 | 0    |
| Admr    | 1.23 | NA   | NA   | NA   | NA   |
| Adnp    | 0    | NA   | NA   | NA   | 0    |
| Adnp2   | NA   | 0.6  | 0.6  | 1.23 | 1.33 |
| Ado     | NA   | 0.31 | 1.06 | 0.44 | 0    |
| Adora1  | 1.3  | 0.73 | 1.7  | 1.25 | 0    |
| Adora2a | 0    | NA   | NA   | NA   | NA   |
| Adora2b | 1.03 | 0.09 | 2.06 | 2.44 | NA   |
| Adora3  | 0.58 | 1.86 | 0.2  | 0.81 | 1.71 |
| Adpgk   | 1.32 | 2.32 | 0.31 | 0.86 | 5.26 |
| Adprh   | 0.91 | 0.22 | 1.98 | 1.3  | 3.11 |
| Adprh11 | 0    | NA   | 1.96 | 0.94 | 0    |
| Adprh12 | 0    | NA   | 3.95 | 1.75 | 1.22 |
| Adprm   | NA   | 1.06 | 1.38 | 3.09 | NA   |
| Adra1a  | 0.79 | 0.64 | 0.82 | 1.29 | 1.44 |
| Adra1b  | 0.52 | 4.56 | 1.6  | 1.39 | 0.1  |
| Adra1d  | 0    | NA   | NA   | 0.68 | NA   |
| Adra2a  | 0.41 | 0    | 1.03 | 0.04 | 1.84 |
| Adra2b  | 1.36 | 2.07 | 1.14 | 0.49 | 0    |
| Adra2c  | 0.24 | 1.91 | 1    | 0    | 0    |
| Adrb1   | 0.95 | 0.93 | 0.99 | 0.62 | 1.55 |
| Adrb2   | 0.11 | 0.76 | 2.04 | 1.29 | 0    |
| Adrb3   | 2.06 | 0.3  | 1.02 | 0.85 | 0    |
| Adrbk1  | 0.6  | 0.45 | 2.36 | 1.68 | 0.02 |
| Adrbk2  | 0    | 0.81 | 1.97 | 0    | 0.04 |
| Adrm1   | 0.53 | 2.11 | 0.39 | 2.87 | 0    |
| Adsl    | 0.01 | 1.55 | 0.44 | 2.33 | 0    |
| Adss    | NA   | 0    | 2.25 | 0.8  | 3    |
| Adssl1  | 0.23 | NA   | 1.03 | 4.15 | 0    |
| Adtrp   | NA   | 0    | 0.69 | 2.72 | NA   |
| Aebp1   | 1.48 | 1.23 | 1.27 | 0.59 | 0.08 |
| Aebp2   | 0.29 | NA   | 1.45 | 0.75 | 1.96 |
| Aen     | NA   | 1.18 | 2.85 | 1.2  | 0.58 |
| Aes     | 3.48 | 0    | 2.57 | 0    | 4.17 |
| Afap1   | NA   | 0.09 | 1.3  | 1.04 | 1.24 |
| Afap111 | NA   | NA   | 2.32 | 1.51 | 2    |
| Afap112 | NA   | NA   | 0    | 0.33 | 0    |
| Aff1    | NA   | 0.33 | 0.06 | 1.14 | 0    |
| Aff2    | NA   | 0.45 | 0.81 | 1.5  | 1.15 |

|        |      |      |      |       |      |
|--------|------|------|------|-------|------|
| Aff3   | NA   | 2.05 | 0.81 | 2.44  | 0    |
| Aff4   | NA   | 0.89 | 0.69 | 0     | 0.18 |
| Afg3l1 | 0.83 | NA   | NA   | NA    | 1.66 |
| Afg3l2 | 0.67 | 0    | 2.69 | 0.83  | 0    |
| Afm    | 1.21 | 1.11 | 0    | 2.26  | 1.71 |
| Afmid  | 0.35 | NA   | 0.95 | 0.82  | 0.02 |
| Afp    | 1.34 | 1.78 | 0.92 | 1.36  | 3.47 |
| Aftph  | NA   | 1.5  | 1.1  | 0     | 0    |
| Aga    | 2.98 | 1.33 | 2.44 | 0.67  | 0.25 |
| Agap1  | NA   | 2.2  | 1.28 | 1.06  | 0.26 |
| Agap2  | NA   | 0.57 | 1.59 | 2.38  | 2.85 |
| Agap3  | NA   | NA   | 0.47 | 1.04  | 1.22 |
| Agbl1  | NA   | NA   | NA   | 1.35  | NA   |
| Agbl2  | NA   | NA   | NA   | 0.07  | NA   |
| Agbl3  | NA   | 1.38 | 0    | 0     | 0.08 |
| Agbl4  | NA   | NA   | 0.86 | 0     | NA   |
| Agbl5  | NA   | 0.01 | 2.21 | 0.76  | 1.69 |
| Ager   | 0.58 | 0.55 | 0.73 | 0.01  | 0    |
| Agfg1  | NA   | 0    | 1.35 | 18.95 | 0    |
| Agfg2  | NA   | 0.78 | 2.53 | 2.11  | 0.53 |
| Aggf1  | NA   | 0.14 | 0.95 | 0.43  | 2.36 |
| Agk    | NA   | 0    | 0.81 | 1.08  | 1.76 |
| Agl    | 0.38 | 0.9  | 1.31 | 3.06  | 0    |
| Agmat  | 0.87 | 0    | 0    | 0.75  | 1.56 |
| Agmo   | NA   | NA   | NA   | 0.81  | NA   |
| Ago1   | NA   | 0    | 1.77 | 0     | NA   |
| Ago2   | NA   | 2.23 | 0.76 | 3.3   | NA   |
| Ago3   | NA   | 1.2  | 0.09 | 0     | NA   |
| Ago4   | NA   | 1.05 | 2.81 | 0     | NA   |
| Agpat1 | 0.44 | 0.72 | 0.07 | NA    | 2.46 |
| Agpat2 | 0    | 0    | 2.44 | 1.25  | 0    |
| Agpat3 | 0.38 | 2.24 | 0.88 | 2.21  | 1.61 |
| Agpat4 | 1.5  | 0.85 | 1.3  | 0     | 2.24 |
| Agpat5 | NA   | 1.91 | 1.08 | 0.04  | 6.98 |
| Agpat6 | NA   | NA   | 0.26 | 1.45  | 0    |
| Agpat9 | NA   | NA   | 2.69 | 0.34  | 5.08 |
| Agphd1 | NA   | NA   | NA   | NA    | 2.16 |
| Agps   | 0.84 | 1.6  | 0.88 | 0.56  | 0    |
| Agr2   | 1.38 | 1.29 | 0.93 | 0.88  | 4.44 |
| Agr3   | NA   | NA   | 1.83 | 0.77  | 0    |
| Agmn   | NA   | 0.62 | 0.42 | 0.87  | 1.7  |

|         |      |      |      |       |      |
|---------|------|------|------|-------|------|
| Agrp    | 0.32 | 1.63 | 3.14 | 2.96  | 0    |
| Agt     | 0.54 | 1.19 | 0.54 | 0     | 1.58 |
| Agtpbp1 | 0    | 1.14 | 0.58 | 0.87  | 0.15 |
| Agtr1   | 0.79 | NA   | NA   | NA    | NA   |
| Agtr2   | 2.69 | 1.14 | 1.97 | 1.98  | 4.36 |
| Agtrap  | 0.1  | NA   | 1.62 | 0.27  | 0.87 |
| Agtrl1  | 0.68 | NA   | NA   | NA    | NA   |
| Agxt    | 0.81 | 1.49 | 0.98 | 4.1   | 0    |
| Agxt2   | NA   | NA   | 1.2  | 1.42  | 1.61 |
| Agxt2l1 | 4.22 | NA   | NA   | NA    | 0.26 |
| Agxt2l2 | NA   | NA   | NA   | NA    | 0    |
| Ahctf1  | NA   | 0    | 0.41 | 1.49  | 1.47 |
| Ahcy    | 0    | 1.21 | 0.67 | 0     | 0    |
| Ahcy11  | 1.28 | 0.46 | 4.62 | 0     | 2.05 |
| Ahcy12  | NA   | 0    | 0.86 | 0.01  | 0    |
| Ahdc1   | NA   | 0.79 | 0.26 | 0     | 0    |
| Ahi1    | 0    | 0.84 | 0.64 | 3.82  | 0    |
| Ahnak   | 1.72 | 0    | 1.37 | 18.68 | 0    |
| Ahnak2  | NA   | 1.66 | 1.21 | 0.06  | 0    |
| Ahr     | 2.03 | 0.75 | 0.6  | 0     | 0    |
| Ahrr    | 1.35 | NA   | 0.72 | 1.75  | 1.35 |
| Ahsa1   | 0.39 | 0.37 | 0.78 | 0.32  | 0.01 |
| Ahsa2   | NA   | NA   | 2.24 | 1.73  | 8.28 |
| Ahsg    | 1.14 | 2.16 | 0.06 | 1.33  | 2.55 |
| Ahsp    | NA   | 1.69 | 0.32 | 0.59  | NA   |
| Aicda   | 0    | 2.43 | 0.05 | 1.88  | 0    |
| Aida    | NA   | 1.83 | 1.15 | 0.8   | 2.44 |
| Aif1    | 0.31 | 0.38 | 2.36 | 0.01  | 0    |
| Aif11   | NA   | NA   | 0.89 | 0.7   | 1.17 |
| Aifm1   | NA   | 1.18 | 1.27 | 0.22  | 3.35 |
| Aifm2   | NA   | NA   | 1.44 | 1.89  | 0.51 |
| Aifm3   | NA   | NA   | 0    | 1.02  | 1.56 |
| Aig1    | 0.89 | NA   | 1.32 | 2.83  | 0.62 |
| Aim1    | 1.25 | 2.43 | 2.07 | 0.2   | 0    |
| Aim11   | 1.7  | 1.28 | 1.19 | 3.39  | 0    |
| Aim2    | NA   | 0    | 0    | 2.4   | 1.21 |
| Aimp1   | NA   | 0.98 | 4.54 | 5.18  | 2.51 |
| Aimp2   | NA   | 1.09 | 0.96 | NA    | 3.79 |
| Aip     | 0.27 | 0    | 0.33 | 0.76  | 0    |
| Aipl1   | 0.5  | 1.76 | 2.71 | 1.11  | 0    |
| Aire    | 0.68 | 1.46 | 0.32 | 1.16  | 1.27 |

|         |      |      |      |      |       |
|---------|------|------|------|------|-------|
| Ajap1   | NA   | 1.01 | 0    | 1.33 | 5.67  |
| Ajuba   | NA   | NA   | 1.24 | 2.7  | NA    |
| Ak1     | 0    | 1.09 | 0.33 | 0    | 1.66  |
| Ak2     | 0.67 | 1.1  | 0.6  | 0.66 | NA    |
| Ak3     | NA   | NA   | 1.31 | 1.68 | 2.26  |
| Ak311   | NA   | NA   | NA   | NA   | 3.07  |
| Ak4     | NA   | 1.26 | 1.37 | 1.35 | NA    |
| Ak5     | 0    | 2.7  | 0.1  | 1.68 | 0     |
| Ak7     | 1.42 | NA   | 0    | 2.71 | 14.02 |
| Ak8     | NA   | NA   | 1.23 | 0.47 | NA    |
| Ak9     | NA   | NA   | NA   | 0.44 | NA    |
| Akap1   | 0.18 | 0.63 | 0.01 | 1.88 | 1.83  |
| Akap10  | 0.9  | 1.17 | 1.06 | 0.18 | 0.04  |
| Akap11  | 0    | 0    | 0.69 | 0    | 1.52  |
| Akap12  | 0.08 | 1.31 | 1.37 | 0.16 | 1.06  |
| Akap13  | NA   | 0.15 | 0.95 | 0    | 0     |
| Akap14  | NA   | NA   | 1.44 | 5.65 | 1.03  |
| Akap2   | 1.07 | NA   | NA   | NA   | NA    |
| Akap3   | 0.03 | 1.04 | 0.73 | 2.46 | 0.07  |
| Akap4   | 0.96 | 0.83 | 0.02 | NA   | 0.71  |
| Akap5   | NA   | 0.94 | 0.94 | 1.59 | 0     |
| Akap6   | NA   | 0.89 | 0.97 | 0    | 1.45  |
| Akap7   | 0.61 | 0    | 0.21 | 0.68 | 0     |
| Akap8   | 0.14 | 0    | 2.94 | 1.13 | 0     |
| Akap8l  | 0.31 | 1.97 | 2.58 | 3.15 | 0     |
| Akap9   | 0.65 | 0.18 | 0.44 | 0    | 0.18  |
| Akip1   | NA   | 2.95 | 2.52 | 1.56 | NA    |
| Akirin1 | NA   | 2.49 | 1.99 | 3.03 | 0     |
| Akirin2 | NA   | 1.43 | 1.79 | 0.19 | 2.07  |
| Akna    | NA   | NA   | 2.05 | 0.78 | 0.49  |
| Aknad1  | NA   | NA   | 0    | 0.95 | NA    |
| Akr1a1  | NA   | 0.42 | 0.94 | 0.02 | NA    |
| Akr1b10 | NA   | 2.29 | 4.69 | 1.61 | 1.27  |
| Akr1d1  | 2.77 | 1.61 | 1.46 | 0    | 2.44  |
| Akt1    | 0.01 | 1.99 | 2.1  | 0.69 | 1.65  |
| Akt1s1  | 0.26 | NA   | 0.81 | 2.5  | 0     |
| Akt2    | 0.07 | 1.07 | 0.59 | 1.56 | 1.53  |
| Akt3    | 0.65 | 0    | 2.22 | 0.3  | 0     |
| Aktip   | NA   | 0.51 | 1.63 | NA   | 0     |
| Alad    | 1.17 | 0.28 | 0.72 | 4.81 | NA    |
| Alas1   | 0.63 | 0.24 | 0    | 0.51 | 0     |

|          |      |      |      |      |       |
|----------|------|------|------|------|-------|
| Alas2    | 3.17 | 1.53 | 1.07 | 1.85 | 1.26  |
| Alb      | NA   | 1.75 | 1.32 | 2.79 | 10.47 |
| Alcam    | 0.4  | 0.69 | 1.44 | 2.09 | 0     |
| Aldh16a1 | NA   | NA   | 0    | 0.4  | 0     |
| Aldh18a1 | NA   | 1.84 | 2.21 | 0.88 | 1.95  |
| Aldh1a1  | 1.81 | 0.1  | 1.19 | 1.35 | 0     |
| Aldh1a2  | 0.35 | 0.99 | 0.84 | 1.84 | 0     |
| Aldh1a3  | 1.66 | 1.06 | 0.06 | 3.06 | 0     |
| Aldh1b1  | 1    | 2.01 | 2.82 | 0    | 0     |
| Aldh111  | NA   | 1.21 | 1.15 | 0    | 6.24  |
| Aldh112  | NA   | NA   | 1.41 | 1.01 | 0     |
| Aldh2    | 0.87 | 0.06 | 0.72 | 0    | 0.53  |
| Aldh3a1  | 1.31 | 0.58 | 0.75 | 0.76 | 0     |
| Aldh3a2  | 0    | 0    | 0.05 | 0.78 | 3.53  |
| Aldh3b1  | 0    | 2.36 | 1.57 | NA   | 3.81  |
| Aldh3b2  | NA   | 0.79 | 2.59 | 0.44 | 5.25  |
| Aldh4a1  | 0.39 | 1.58 | 1.08 | 0.96 | 1.5   |
| Aldh5a1  | 2.52 | 0    | 4.4  | 1.06 | 0     |
| Aldh6a1  | 0.44 | 0    | 1.26 | NA   | 0     |
| Aldh7a1  | 0    | 0.96 | 1.06 | 2.17 | 1.41  |
| Aldh8a1  | 0.41 | 1.96 | 0.07 | 0    | 0.75  |
| Aldh9a1  | 0    | 0    | 1.83 | 1.12 | 0     |
| Aldoa    | 0.76 | 1.46 | 0.07 | 0.33 | 1.48  |
| Aldob    | 1.49 | 1.57 | 0.44 | 1.04 | 3.64  |
| Aldoc    | 0.25 | 0    | 2.57 | 1.97 | 1     |
| Alg1     | 0    | NA   | 0.19 | NA   | 0.84  |
| Alg10b   | NA   | NA   | 1.33 | 0    | 0.14  |
| Alg11    | NA   | NA   | NA   | 0.12 | NA    |
| Alg12    | 0    | 0    | 0.2  | 0    | 0     |
| Alg13    | NA   | 1.57 | 1.11 | 0.61 | 1.57  |
| Alg14    | NA   | NA   | 0.43 | 0.77 | NA    |
| Alg2     | 0.6  | NA   | 0.97 | 0.9  | 1.22  |
| Alg3     | 0.2  | 1.92 | 3.55 | 2.61 | 0.29  |
| Alg5     | 0.04 | 0.75 | 0.79 | 0.04 | 1.4   |
| Alg6     | 0    | 2.12 | 2.36 | 1.14 | 0     |
| Alg8     | 0    | 1.79 | 1.5  | 0.93 | 0     |
| Alg9     | NA   | NA   | 1.07 | 0    | 0     |
| Alk      | 0    | 1.1  | 1.77 | 1.85 | 3.11  |
| Alkbh1   | NA   | 0.4  | 1.86 | NA   | 0     |
| Alkbh2   | NA   | NA   | 0.35 | 1.2  | 0     |
| Alkbh3   | NA   | NA   | 0.13 | NA   | 2.13  |

|          |      |      |      |      |      |
|----------|------|------|------|------|------|
| Alkbh4   | NA   | 1.02 | 0.14 | 2.85 | 1.65 |
| Alkbh5   | NA   | NA   | 2.85 | 0.76 | 1.91 |
| Alkbh6   | NA   | NA   | 1.91 | 1.23 | 2.67 |
| Alkbh7   | NA   | NA   | 2.5  | 1.47 | 0    |
| Alkbh8   | NA   | NA   | 0.28 | 1.29 | 0    |
| Allc     | 0    | 1.39 | 1.28 | 5.99 | 0    |
| Alms1    | 0    | 0    | 1.44 | 0    | 0    |
| Alox12   | 0    | 0.46 | 1.28 | 1.34 | 0.32 |
| Alox12b  | 6.42 | 1.21 | 1.3  | 1.13 | NA   |
| Alox15   | 0.89 | 0    | 3.84 | 0.65 | 0    |
| Alox15b  | 0    | NA   | NA   | NA   | NA   |
| Alox5    | NA   | 0.28 | 0    | 0.82 | 0    |
| Alox5ap  | 0.21 | 0.06 | 0    | 0.04 | 0    |
| Aloxe3   | 0.85 | 0    | 0.72 | 1.73 | 2.35 |
| Alpi     | NA   | 0    | 0.25 | 0.77 | 1.69 |
| Alpk1    | NA   | 0    | 1.02 | 1.2  | 0    |
| Alpk2    | NA   | NA   | 0.1  | 1.94 | 0    |
| Alpk3    | NA   | 0    | 1.84 | 1.75 | 3.09 |
| Alpl     | NA   | 3.26 | 2.03 | 1.32 | 0    |
| Alppl2   | NA   | 1.26 | 1.2  | 3.7  | 1.38 |
| Als2     | 0    | NA   | 0.15 | NA   | 1.29 |
| Als2cl   | NA   | 1.36 | 1.96 | 1.69 | 0    |
| Als2cr11 | NA   | NA   | 0.47 | 1.02 | NA   |
| Als2cr12 | NA   | NA   | 2.93 | 0    | 0    |
| Als2cr13 | 0.02 | NA   | NA   | NA   | NA   |
| Als2cr2  | 0    | NA   | NA   | NA   | NA   |
| Als2cr4  | NA   | NA   | NA   | NA   | 0    |
| Alx1     | NA   | 1.07 | 0    | 0.12 | 1.36 |
| Alx3     | 1.53 | 0.96 | 0.73 | 2.11 | 0    |
| Alx4     | 0.59 | 4.23 | 5.47 | 2.42 | 0    |
| Alyref   | NA   | NA   | 3.01 | 0.45 | NA   |
| Amac1    | 0    | NA   | NA   | NA   | NA   |
| Amacr    | 0.61 | 0.54 | 2.59 | NA   | 0.5  |
| Ambn     | 1.06 | 2.48 | 3.1  | 0.95 | 4.22 |
| Ambp     | 1.85 | 1.67 | 3.06 | 2.75 | 6.35 |
| Ambra1   | NA   | 0    | 0.71 | 1.71 | 0    |
| Amdl     | 0.06 | 0    | 1.56 | 1.43 | 0    |
| Amdhd1   | NA   | NA   | 1.36 | 1.69 | 1.31 |
| Amdhd2   | NA   | 2.97 | 1.57 | 0    | 0    |
| Amelx    | 1.93 | 2.89 | 0.66 | 0.78 | 1.73 |
| Amer1    | NA   | NA   | 0.92 | 0    | NA   |

|          |      |      |      |      |      |
|----------|------|------|------|------|------|
| Amer2    | NA   | NA   | 1.35 | 0.73 | NA   |
| Amer3    | NA   | NA   | 0    | 0.18 | NA   |
| Amfr     | 1.3  | 1.5  | 3.16 | 1.55 | NA   |
| Amh      | 0.41 | 1.04 | 2.19 | NA   | 4.87 |
| Amhr2    | 0.69 | 0.89 | 0.54 | 0.02 | 0    |
| Amica1   | NA   | NA   | NA   | 2.65 | NA   |
| Amigo1   | NA   | NA   | 0.86 | 1.14 | 2.09 |
| Amigo2   | NA   | 0    | 0.49 | NA   | 4.76 |
| Amigo3   | 1.51 | NA   | NA   | 1.61 | NA   |
| Ammecr1  | 0    | 0.79 | 1.78 | 2.22 | 1.62 |
| Ammecr11 | NA   | NA   | 1.51 | 0.29 | 2.2  |
| Amn      | 1.85 | 2.9  | 0.27 | 1.38 | 2.62 |
| Amn1     | NA   | NA   | 0.96 | NA   | 2.37 |
| Amot     | 0.37 | 1.23 | 1.33 | 0.18 | 2.18 |
| Amotl1   | 0.67 | NA   | 1.26 | 4.15 | 0.89 |
| Amotl2   | 0    | 0.05 | 1.26 | 1.44 | 0    |
| Ampd1    | NA   | 1.7  | 0.53 | 0.06 | 0    |
| Ampd2    | 0.28 | 1.6  | 0.22 | 2.57 | 0    |
| Ampd3    | 0.4  | 2.42 | 6.75 | 0.42 | 0    |
| Amph     | 0.76 | 0.99 | 0.19 | 0.83 | 9.9  |
| Amtn     | NA   | NA   | NA   | 0.98 | NA   |
| Amz1     | NA   | NA   | 1.22 | 0.92 | NA   |
| Amz2     | NA   | 1.7  | 1.7  | 0    | 0    |
| Anapc1   | 0    | 0    | 0.77 | 0    | 0    |
| Anapc10  | 0.81 | 0.21 | 1.55 | 2.05 | 0.89 |
| Anapc11  | 0    | NA   | 1.29 | 2.03 | 0.23 |
| Anapc13  | 0.28 | 1.05 | 0.47 | NA   | 0    |
| Anapc15  | NA   | 0.96 | 1.94 | NA   | NA   |
| Anapc16  | NA   | NA   | 1.53 | 1.04 | NA   |
| Anapc2   | 0.98 | 0    | 3.81 | 0.04 | 0    |
| Anapc4   | 0.3  | NA   | 1.06 | 0.48 | 0    |
| Anapc5   | 0.07 | 0    | 1.65 | 0.17 | 0    |
| Anapc7   | NA   | NA   | 0.92 | 0.38 | 2.83 |
| Ang      | NA   | 2.57 | 1.92 | NA   | 0.56 |
| Angel1   | NA   | 0    | 3.98 | 4.16 | 0.84 |
| Angel2   | NA   | 0.86 | 1.03 | 0.59 | 1.85 |
| Angpt1   | NA   | 1.09 | 1.95 | 2.29 | 1.16 |
| Angpt2   | NA   | 0.32 | 1.51 | 4    | 1.13 |
| Angpt4   | NA   | 0.65 | 1.55 | 3.23 | 1.83 |
| Angptl1  | 1.55 | NA   | 0.38 | 1.59 | 0.81 |
| Angptl2  | 0    | 0.62 | 2.1  | 2.7  | 0    |

|          |      |      |      |      |      |
|----------|------|------|------|------|------|
| Angptl3  | 0.73 | 3.76 | 1.84 | 1.25 | 2.38 |
| Angptl4  | 0.54 | 1.34 | 0.32 | 1.3  | 0    |
| Angptl6  | 0.54 | NA   | 1.74 | NA   | 3.99 |
| Angptl7  | NA   | 2.12 | 0.69 | 1.15 | 4.31 |
| Ank1     | 0.61 | 0.73 | 0    | 0.8  | 1.06 |
| Ank2     | 1.67 | 0.51 | 0.42 | 9.76 | 0.92 |
| Ank3     | 0.81 | 0.82 | 0.47 | 1.68 | 0.21 |
| Ankar    | NA   | NA   | NA   | 0.94 | NA   |
| Ankef1   | NA   | 0.99 | 0.39 | 0.91 | NA   |
| Ankfn1   | NA   | NA   | NA   | 4.09 | NA   |
| Ankfy1   | 0.42 | 1.6  | 1.45 | 0    | 0    |
| Ankhd1   | 0.78 | 0.59 | 0.57 | NA   | 1.1  |
| Ankib1   | NA   | NA   | 0.96 | 0.64 | 0    |
| Ankk1    | NA   | NA   | NA   | 0    | NA   |
| Ankle1   | NA   | NA   | 0.51 | 1.37 | NA   |
| Ankle2   | NA   | 0.56 | 1.44 | 0    | 0.6  |
| Ankmy1   | NA   | NA   | NA   | 0.47 | NA   |
| Ankmy2   | 0    | 0.71 | 0.8  | 0.16 | 0    |
| Ankra2   | 0.1  | 0.21 | 0.61 | 1.06 | 4.22 |
| Ankrd1   | 0    | 0.8  | 0    | 0.19 | 2.31 |
| Ankrd10  | 0.12 | 0.96 | 0.63 | 1.48 | 0    |
| Ankrd11  | NA   | 1.11 | 0.94 | 0    | 0.84 |
| Ankrd12  | NA   | 0.8  | 0.56 | 1.84 | 0    |
| Ankrd13a | NA   | NA   | 8.34 | 0.57 | 0    |
| Ankrd13b | NA   | NA   | 2.96 | 2.24 | 5.55 |
| Ankrd13c | NA   | NA   | 0.41 | 0.64 | 3.01 |
| Ankrd13d | NA   | NA   | 2.32 | 3.76 | 0    |
| Ankrd16  | 0.5  | NA   | 1.25 | 1.62 | 0.2  |
| Ankrd17  | 0.23 | 1.11 | 0.12 | 1.24 | 0.78 |
| Ankrd2   | 6.88 | 0    | 0    | 0.29 | 3.94 |
| Ankrd22  | 0    | NA   | 1.22 | 0    | 0    |
| Ankrd23  | 0.52 | NA   | 1.2  | NA   | 1.04 |
| Ankrd24  | NA   | NA   | 0.65 | 3.2  | 0    |
| Ankrd25  | 0    | NA   | NA   | NA   | NA   |
| Ankrd26  | NA   | 1.16 | 2.05 | 1.22 | 0.02 |
| Ankrd27  | 0    | 0    | 0.8  | 4.02 | 2.4  |
| Ankrd28  | 1.19 | 2.25 | 3.03 | 1.86 | 1.46 |
| Ankrd29  | 0    | NA   | 0.21 | 0.97 | 0    |
| Ankrd31  | NA   | NA   | 1.39 | NA   | NA   |
| Ankrd32  | 0.67 | NA   | 0.3  | 0.59 | 1.94 |
| Ankrd33  | NA   | NA   | 0.2  | 1.3  | 0    |



|          |       |      |      |      |      |
|----------|-------|------|------|------|------|
| Ankrd33b | NA    | NA   | 0.48 | 1.03 | NA   |
| Ankrd34a | NA    | NA   | 0.87 | 2.9  | 0    |
| Ankrd34b | NA    | NA   | NA   | 0.54 | NA   |
| Ankrd34c | NA    | NA   | NA   | 2.41 | NA   |
| Ankrd35  | NA    | NA   | 0.05 | 19.1 | 1.02 |
| Ankrd36  | NA    | 1.21 | 0.95 | 0.53 | 1.47 |
| Ankrd37  | NA    | NA   | 2.33 | 2.15 | 1.61 |
| Ankrd39  | NA    | NA   | 1.17 | 0.21 | 0    |
| Ankrd40  | NA    | 1.01 | 1.16 | 1.28 | 0.52 |
| Ankrd42  | NA    | NA   | 0.29 | 0    | 2.5  |
| Ankrd43  | NA    | NA   | NA   | NA   | 2.18 |
| Ankrd44  | NA    | NA   | 1.68 | 0    | 1.29 |
| Ankrd45  | NA    | NA   | 4.51 | 1.33 | 0    |
| Ankrd46  | NA    | 2.34 | 1.61 | 0.38 | 4    |
| Ankrd49  | NA    | 0.83 | 1.73 | 0.97 | 0    |
| Ankrd5   | 1.04  | NA   | NA   | NA   | 0.64 |
| Ankrd50  | NA    | NA   | 1.1  | 3.78 | 0    |
| Ankrd52  | NA    | NA   | 0.96 | 2.37 | 0.88 |
| Ankrd53  | NA    | NA   | NA   | 0.77 | NA   |
| Ankrd54  | NA    | NA   | 2.27 | 3.3  | 1.94 |
| Ankrd55  | NA    | 4.05 | 1.44 | 1.14 | 0    |
| Ankrd57  | NA    | NA   | NA   | NA   | 1.87 |
| Ankrd6   | 0.63  | 0.75 | 1.4  | NA   | 1.51 |
| Ankrd7   | NA    | 3.79 | 0.17 | 2.94 | 1.72 |
| Ankrd9   | 12.96 | NA   | 0.96 | 0.24 | 0.09 |
| Anks1b   | NA    | 0    | 0.49 | 0.73 | 0    |
| Anks3    | NA    | NA   | 0.77 | 0.02 | 2.05 |
| Anks4b   | NA    | NA   | 0.01 | 1.51 | 0    |
| Anks6    | NA    | NA   | NA   | 0.43 | NA   |
| Ankzfl   | NA    | 0    | 0.88 | 0    | 2.97 |
| Anln     | 0.07  | NA   | 1.54 | 0    | 0.75 |
| Ano1     | NA    | 0    | 0.04 | 2.57 | 0.6  |
| Ano10    | NA    | 0    | 0.26 | 0.95 | 0    |
| Ano2     | NA    | NA   | NA   | 1.28 | NA   |
| Ano3     | NA    | 0.68 | 0.9  | NA   | 1.33 |
| Ano4     | NA    | NA   | 1.32 | NA   | 0    |
| Ano5     | NA    | NA   | NA   | 1.23 | NA   |
| Ano6     | NA    | NA   | 1.95 | 1.48 | 2.06 |
| Ano7     | NA    | NA   | NA   | 1.19 | NA   |
| Ano8     | NA    | NA   | 2.34 | 0    | NA   |
| Ano9     | NA    | NA   | 1.87 | 1.67 | 2.98 |

|         |      |      |      |      |      |
|---------|------|------|------|------|------|
| Anp32a  | 0.73 | 0.18 | 1.92 | 0.97 | 2.15 |
| Anp32b  | 0    | 3.01 | 1.88 | 1.07 | 0    |
| Anp32e  | 1.14 | 0.61 | 1    | 0.66 | 0    |
| Anpep   | 2.85 | 0    | 1.75 | 0    | 2.02 |
| Antxr1  | 0.48 | 0.62 | 1.13 | 1.1  | 1.55 |
| Antxr2  | 1.18 | NA   | 2.06 | 2.52 | 0.11 |
| Anubl1  | 3.28 | NA   | NA   | NA   | 0.05 |
| Anxa1   | 0.42 | 0.1  | 0.31 | 2.27 | 2.15 |
| Anxa10  | 0    | 1.22 | 0    | 1.25 | 1.9  |
| Anxa11  | 0    | 2.52 | 0.98 | 1.31 | NA   |
| Anxa13  | 0    | 1.2  | 2.19 | 0.88 | 8.84 |
| Anxa2   | 0    | 1.65 | 1.5  | 4.7  | 3.2  |
| Anxa3   | 0.94 | 0    | 0    | 1.36 | 0    |
| Anxa4   | 1.14 | 0.43 | 3.98 | 1.47 | 0    |
| Anxa5   | 0    | 0.54 | 0.77 | 0    | 0.5  |
| Anxa6   | 0.74 | 0    | 0.5  | 0    | 0.81 |
| Anxa7   | 0    | 1.65 | 4.28 | 2.56 | 0.6  |
| Anxa8   | 9.74 | NA   | NA   | NA   | NA   |
| Anxa9   | NA   | 0.58 | 4.08 | NA   | 1.52 |
| Aoah    | 0.24 | 0    | 2.02 | 1.12 | 0    |
| Aoc2    | 1.31 | NA   | NA   | 0.23 | NA   |
| Aoc3    | 0.26 | 0    | 8.64 | 1.2  | 1.83 |
| Aof1    | 0    | NA   | NA   | NA   | NA   |
| Aof2    | 0    | NA   | NA   | NA   | NA   |
| Aox1    | 0.48 | 1.46 | 2.11 | 3.34 | 2.75 |
| Ap1ar   | NA   | 2.28 | 0.51 | 0.77 | NA   |
| Ap1b1   | 0.14 | 0.6  | 0.91 | 0    | 0    |
| Ap1g1   | 0.69 | 0    | 1.46 | 0.24 | 0    |
| Ap1g2   | 1.54 | 0.66 | 1.94 | 0    | 0    |
| Ap1gbp1 | 1.4  | NA   | NA   | NA   | NA   |
| Ap1m1   | 0.13 | NA   | 2.38 | 0.01 | 0    |
| Ap1m2   | 0.5  | 1.08 | 0.65 | 2.05 | 0    |
| Ap1s1   | 0    | 0    | 0.72 | 0.2  | 0.69 |
| Ap1s2   | 0    | 0.63 | 0.12 | 0.39 | 0.44 |
| Ap1s3   | 0    | NA   | 1.6  | 0.46 | 2.67 |
| Ap2a1   | 0.59 | NA   | 0    | 0.94 | 0.11 |
| Ap2a2   | 0.14 | 1.16 | 0.64 | 0    | 0    |
| Ap2b1   | 0.7  | 0.86 | 0.29 | 0.9  | 0.13 |
| Ap2m1   | 0    | 0    | 0.69 | 0.06 | 0    |
| Ap2s1   | NA   | 1.43 | 1.85 | 0.04 | 0    |
| Ap3b1   | 0.02 | 0    | 1.56 | 0.21 | 0    |

|         |      |      |      |      |       |
|---------|------|------|------|------|-------|
| Ap3b2   | 1.28 | 2.04 | 0.97 | 0.84 | 0.09  |
| Ap3d1   | 0.26 | 0.91 | 1.18 | 0    | 1.67  |
| Ap3m1   | 0.28 | NA   | 1.02 | 0.4  | 0     |
| Ap3m2   | 3.12 | 0    | 0.68 | 0.67 | 1.21  |
| Ap3s1   | 1.55 | 0.9  | 1.73 | 1.97 | 1.98  |
| Ap3s2   | 0.37 | 1.56 | 0.35 | 1.51 | 1.76  |
| Ap4b1   | 2.13 | NA   | 1.7  | 0.44 | 0.7   |
| Ap4e1   | 0.53 | 0.9  | 1.22 | 0.73 | 0     |
| Ap4m1   | 0    | 1.42 | 7.13 | 0.45 | 3.98  |
| Ap4s1   | 0.74 | 1.27 | 2.42 | 0.7  | 0.77  |
| Ap5b1   | NA   | NA   | 0.78 | 1.09 | NA    |
| Ap5m1   | NA   | 1.66 | 0.91 | 0.55 | NA    |
| Ap5s1   | NA   | 2.27 | 1.1  | 0.77 | NA    |
| Ap5z1   | NA   | 0.93 | 0.63 | 0.62 | NA    |
| Apaf1   | 0.07 | 0    | 0.76 | 0    | 0.61  |
| Apba1   | 1.15 | 1.06 | 2.16 | 2.06 | 1.38  |
| Apba2   | 0    | 0    | 0    | 1.49 | 0     |
| Apba2bp | 0.15 | NA   | NA   | NA   | NA    |
| Apba3   | 0.27 | 1.47 | 1.49 | 1.6  | 0     |
| Apbb1   | 0.72 | 0    | 0.82 | 0.82 | 0     |
| Apbb1ip | 0    | 0.8  | 2.22 | 0    | 1.74  |
| Apbb2   | 0.72 | 0.59 | 2.08 | 1.45 | 0     |
| Apbb3   | 3.92 | 3.02 | 0.13 | 7.59 | 2.69  |
| Apc     | 0.61 | 1.31 | 0.1  | 0    | 0.15  |
| Apc2    | 4.78 | 1.29 | 0.64 | 1.09 | 1.39  |
| Apcdd1  | NA   | NA   | 3.11 | 4.86 | 0.84  |
| Apcs    | 0.62 | 0    | 2.47 | 0    | 23.93 |
| Apeg1   | 1.28 | NA   | NA   | NA   | NA    |
| Apeh    | 0    | 0    | 0.02 | 0    | 1.68  |
| Apex1   | 0.32 | 1.98 | 0.62 | NA   | 6.18  |
| Apex2   | 1.02 | 1.43 | 0    | 0.82 | 0     |
| Aph1a   | NA   | 0.07 | 2.11 | 0.05 | 0     |
| Aph1b   | NA   | 0    | 0.04 | 4.16 | 3.58  |
| Api5    | 0    | 0.75 | 0.75 | 0.69 | 0     |
| Apip    | NA   | 0.97 | 2.23 | 2.48 | 0     |
| Apitd1  | NA   | 0.14 | 3.03 | NA   | 2.54  |
| Aplf    | NA   | NA   | 0.79 | 2.33 | 0.95  |
| Apln    | 1.08 | NA   | 0    | 0.73 | 4.59  |
| Aplnr   | NA   | 1.51 | 1.92 | 0.14 | 0     |
| Aplp1   | 2.59 | 0.03 | 1.84 | 0.91 | 0     |
| Aplp2   | 2.65 | 0.88 | 1.23 | 0.33 | 1.27  |

|         |      |      |      |      |      |
|---------|------|------|------|------|------|
| Apmap   | NA   | 0    | 0.27 | 0.58 | NA   |
| Apoa1   | 0.45 | 1.61 | 0    | 0.64 | 4.65 |
| Apoa1bp | 0    | NA   | 1.87 | 0    | 0    |
| Apoa2   | 0    | 2.54 | 0.61 | 1.31 | 9.13 |
| Apoa4   | 1.18 | 1.37 | 1.2  | 0.76 | 1.03 |
| Apoa5   | 0    | NA   | 1.55 | 0.61 | 2.59 |
| Apob    | 1.76 | 1.3  | 0.79 | 0.98 | 3.04 |
| Apob48r | 0    | NA   | NA   | NA   | 0    |
| Apobec1 | 0.86 | 1.5  | 2.06 | 1.14 | 3.46 |
| Apobec2 | 0    | 1.33 | 1.83 | 0.49 | 0    |
| Apobec4 | NA   | NA   | 4.57 | 1.6  | NA   |
| Apobr   | NA   | 2.61 | 1.65 | 1.32 | NA   |
| Apoc1   | 0.69 | 2.39 | 1.76 | 0    | 3.24 |
| Apoc2   | 0.65 | 0.52 | 2.63 | 4.12 | 2.66 |
| Apoc3   | 2.61 | 2.95 | 1.57 | 1.53 | 7.87 |
| Apoc4   | 1.25 | 1.37 | 2.24 | 0.59 | 3.05 |
| Apod    | 0.39 | 0.69 | 0.85 | 2.66 | 1.65 |
| Apoe    | 8.52 | 2.19 | 0.74 | NA   | 3.03 |
| Apof    | 1.77 | 3.22 | 1.78 | 1    | 1.82 |
| Apoh    | 4.32 | 0.66 | 0.79 | 1.18 | 0    |
| Apol2   | 6.37 | NA   | NA   | NA   | NA   |
| Apol6   | NA   | 0    | 1.55 | 0    | 0    |
| Apold1  | NA   | 2.32 | 1.8  | 1.01 | 1.03 |
| Apom    | 2.65 | 0    | 0.48 | 0.3  | 3.91 |
| Apoo    | NA   | 0    | 2.76 | NA   | 0    |
| Apool   | NA   | 0.46 | 0.37 | 1.6  | 2.18 |
| Apopt1  | NA   | NA   | 0.96 | 2.92 | NA   |
| App     | 0    | 1.37 | 0.93 | 0.14 | 1.36 |
| Appbp1  | 0.83 | NA   | NA   | NA   | NA   |
| Appbp2  | 1.97 | 0.32 | 0.7  | 0.78 | 0    |
| App11   | NA   | 1.28 | 2.19 | 0    | 0    |
| App12   | NA   | 0.65 | 8.6  | 0    | 0    |
| Aprin   | 0.64 | NA   | NA   | NA   | NA   |
| Aprt    | 0.1  | 2.67 | 1.56 | 1.84 | 0    |
| Aptx    | 0.49 | 1.6  | 0.57 | 0.86 | 2.5  |
| Aqp1    | 0    | 1.32 | 0.47 | 2.6  | NA   |
| Aqp11   | 0    | NA   | 1.79 | 1.7  | 0    |
| Aqp2    | 3.68 | 0.69 | 2.53 | 1.38 | 0    |
| Aqp3    | 0.44 | 1.36 | 0.38 | 1.67 | 0    |
| Aqp4    | 0.23 | 0    | 1.44 | 0.48 | 1.69 |
| Aqp5    | 1.31 | 1.82 | 2.61 | 1.78 | NA   |

|           |      |      |      |      |      |
|-----------|------|------|------|------|------|
| Aqp6      | 1.58 | 0.89 | 0.53 | 1.54 | 0    |
| Aqp7      | 1.12 | 1.15 | 1.81 | 0.95 | 1.8  |
| Aqp8      | 0.21 | 3.12 | 1    | 0    | 2.87 |
| Aqp9      | 0    | 4.46 | 3.35 | 0.87 | 4.24 |
| Aqr       | 0.24 | 0.09 | 0.37 | 0.22 | 0    |
| Ar        | 2.2  | 0.76 | 0.56 | 0.66 | 0.97 |
| Araf      | 0.19 | 1.18 | 0.18 | 0.66 | 0.94 |
| Arap1     | NA   | 2.19 | 0.63 | 1.86 | 0.14 |
| Arap2     | NA   | 0.84 | 1.61 | 0    | 1.3  |
| Arap3     | NA   | 2.07 | 0.92 | 0    | 2.59 |
| Arc       | 1.54 | 2.31 | 4.31 | 0.64 | 9.61 |
| Arcn1     | 0    | 1.6  | 0.57 | 0.95 | 0.76 |
| Areg      | 0    | 0.24 | 2.38 | 1.63 | 0    |
| Arel1     | NA   | 1.7  | 1.09 | 1.22 | NA   |
| Arf1      | NA   | 1.24 | 0.07 | 1.89 | 0.33 |
| Arf3      | 0    | 0.64 | 0.99 | 2.78 | 1.06 |
| Arf4      | 0.84 | 0.13 | 1.7  | 0.11 | 0    |
| Arf5      | 0    | 2.59 | 0.58 | 0.08 | NA   |
| Arf6      | 1.72 | 1.29 | 2.79 | 0.91 | 0    |
| Arfgap1   | 0.57 | 1    | 0.23 | 0    | 0    |
| Arfgap2   | NA   | 0    | 1.01 | NA   | 0    |
| Arfgap3   | 0.78 | 0.9  | 0.52 | 1.1  | 0    |
| Arfgef1   | 0.32 | 0.42 | 1.06 | 1.38 | 0.17 |
| Arfgef2   | 1.2  | 0.28 | 1.55 | 0    | 1    |
| Arfip1    | 0.64 | 0.08 | 2.26 | 0.13 | 6.51 |
| Arfip2    | 2.2  | 0    | 0.22 | 0.74 | 0    |
| Arfrp1    | 0.93 | 0.68 | 0.39 | 0.81 | 0.77 |
| Arg1      | 0.59 | 3.31 | 1.46 | 1.82 | 1.54 |
| Arg2      | 0.88 | 3.45 | 1.56 | NA   | 0    |
| Arglu1    | NA   | 1.22 | 0.93 | 0.68 | 0    |
| Arhgap1   | 0    | 0    | 2.22 | 0    | 0    |
| Arhgap10  | 0    | 0    | 0.2  | 0.2  | 2.07 |
| Arhgap11a | NA   | 0.06 | 2.84 | 0.68 | 2.64 |
| Arhgap12  | 8.06 | 1.64 | 2.65 | 0.97 | 1.27 |
| Arhgap15  | 0.76 | 1.72 | 1.1  | 0.88 | 1.74 |
| Arhgap17  | 0.53 | 0    | 2.71 | 1.02 | 0    |
| Arhgap18  | 0.25 | NA   | 4.14 | 5.06 | 0    |
| Arhgap19  | 0.97 | 1.18 | 1.75 | NA   | 2.05 |
| Arhgap20  | 0.92 | NA   | 0.4  | 0    | 1.37 |
| Arhgap21  | 1.1  | NA   | 1.51 | 0    | 0.04 |
| Arhgap22  | 0.46 | 2.93 | 2.03 | 0.36 | 0.17 |

|           |      |      |      |       |      |
|-----------|------|------|------|-------|------|
| Arhgap23  | NA   | NA   | 0.51 | NA    | 0    |
| Arhgap24  | 1.19 | 0.03 | 1.37 | 1.4   | 0    |
| Arhgap25  | 0.02 | 2.04 | 0.03 | 0.58  | 7.57 |
| Arhgap26  | NA   | 0.27 | 1.65 | 2.41  | 1.23 |
| Arhgap27  | NA   | NA   | 1.16 | 0.92  | 1.09 |
| Arhgap28  | NA   | 0.8  | 0.95 | 0     | 0    |
| Arhgap29  | NA   | 1.26 | 0.34 | 0.29  | 1.87 |
| Arhgap30  | NA   | NA   | 2.54 | 0.68  | 0.78 |
| Arhgap31  | NA   | NA   | 1    | 8.83  | NA   |
| Arhgap32  | NA   | 0    | 1.25 | 0     | NA   |
| Arhgap33  | NA   | 0.98 | 1.56 | 0.1   | NA   |
| Arhgap36  | NA   | NA   | 0    | 2.5   | NA   |
| Arhgap39  | NA   | NA   | 1.1  | 1.05  | NA   |
| Arhgap4   | 0.73 | 1.14 | 1.12 | 1.45  | 0.59 |
| Arhgap40  | NA   | NA   | NA   | 2.45  | NA   |
| Arhgap42  | NA   | NA   | 0.56 | 0.78  | NA   |
| Arhgap44  | NA   | 0.55 | 1.2  | 0.54  | NA   |
| Arhgap5   | 0.42 | 1.03 | 1.78 | 0.49  | 0    |
| Arhgap6   | 0.85 | 1.04 | 1.39 | 3.23  | 0.9  |
| Arhgap8   | 0.3  | NA   | 0.94 | NA    | 2.51 |
| Arhgap9   | 0    | NA   | 1.71 | 1.41  | 1.51 |
| Arhgdia   | 0    | 2.02 | 2.51 | 21.43 | 4.16 |
| Arhgdib   | 0.19 | 1.06 | 0.78 | 0     | 1.19 |
| Arhgdig   | 1.2  | 0.2  | 1.87 | 3.13  | 0    |
| Arhgef1   | 0    | 0    | 0.37 | 2.93  | 0.25 |
| Arhgef10  | 0.81 | 0.86 | 0.68 | 2.64  | 0.69 |
| Arhgef10l | NA   | 2.97 | 1.81 | 0.36  | 0.02 |
| Arhgef11  | 0.95 | 0    | 1.88 | 0     | 2.1  |
| Arhgef12  | 0    | 1.26 | 1.63 | 0     | 0.72 |
| Arhgef15  | NA   | 1    | 0.43 | 1.08  | 9.81 |
| Arhgef16  | 1.32 | 1.99 | 2.93 | 1.13  | 0    |
| Arhgef17  | 1.97 | 0.74 | 0.75 | 0.98  | 0    |
| Arhgef18  | 0    | 0    | 0.93 | NA    | 1.51 |
| Arhgef19  | 0    | NA   | 2.98 | 0.82  | 0.24 |
| Arhgef2   | 0    | 1.08 | 1.65 | 0     | 2.33 |
| Arhgef25  | NA   | NA   | 0.65 | 1.87  | NA   |
| Arhgef26  | NA   | 1.12 | 2.22 | 1.41  | NA   |
| Arhgef28  | NA   | 1.06 | 0.49 | 0     | NA   |
| Arhgef3   | 0.56 | 0    | 0    | 0     | 4.06 |
| Arhgef37  | NA   | NA   | 2.05 | 0     | NA   |
| Arhgef38  | NA   | 0    | 3.1  | 2.11  | NA   |

|          |      |      |      |       |      |
|----------|------|------|------|-------|------|
| Arhgef39 | NA   | NA   | 2.42 | NA    | NA   |
| Arhgef4  | NA   | 0.64 | 3.1  | 1.28  | 1.59 |
| Arhgef40 | NA   | 0.84 | 0.39 | 1.5   | NA   |
| Arhgef5  | 0    | 1.63 | 0.69 | NA    | 0    |
| Arhgef6  | 0    | 1    | 0.79 | 0     | 1.94 |
| Arhgef7  | 0.76 | 0    | 1.28 | 1.06  | 0.64 |
| Arhgef9  | NA   | 2.98 | 0.53 | 0.49  | 1.9  |
| Arid1a   | 0    | 0    | 0.91 | 1.03  | 0.98 |
| Arid1b   | 0.75 | NA   | 0.82 | 1.22  | 0    |
| Arid2    | 0.45 | NA   | 0.98 | 1.9   | 1.45 |
| Arid3a   | 0.57 | 1.03 | 3.26 | 1.92  | 0    |
| Arid3b   | 0.58 | 0.32 | 0.36 | 11.13 | 0.95 |
| Arid3c   | NA   | NA   | NA   | 0.82  | NA   |
| Arid4a   | 0.63 | 0.47 | 1.37 | 0.56  | 2.88 |
| Arid4b   | 1.15 | 0.43 | 0.59 | 0.09  | 0    |
| Arid5a   | 0.54 | 0.47 | 1.35 | 1.05  | 0    |
| Arid5b   | 0    | 1.31 | 1.42 | 0.09  | 0    |
| Arih1    | 0.33 | 0.65 | 1.37 | 0     | 0.09 |
| Arih2    | 0.74 | 0.6  | 0.26 | 0.41  | 2.09 |
| Arl1     | 0.7  | 0.92 | 1.06 | 3.09  | 0.01 |
| Arl10    | NA   | NA   | 1.06 | 1.01  | 0    |
| Arl11    | 1.94 | NA   | NA   | 0.25  | NA   |
| Arl13a   | NA   | NA   | NA   | 0     | NA   |
| Arl13b   | NA   | NA   | 0.69 | 1.46  | 0.17 |
| Arl14    | NA   | 3.06 | 1.32 | 0.98  | 1.06 |
| Arl14ep  | NA   | NA   | 1.25 | 0.65  | NA   |
| Arl15    | NA   | 0.63 | 1.87 | 0.08  | 0.48 |
| Arl16    | NA   | NA   | 1.33 | NA    | 0    |
| Arl2     | 0    | 0    | 0.42 | 0     | 2.97 |
| Arl2bp   | 0.05 | 0.53 | 2.17 | 1.19  | 4.38 |
| Arl3     | 0.44 | 0.58 | 0.77 | 0.39  | 0    |
| Arl4a    | NA   | 2.36 | 0.8  | 3.25  | 2.65 |
| Arl4c    | NA   | 0    | 1.07 | 2.79  | NA   |
| Arl4d    | NA   | 1.14 | 0.54 | 0.24  | 0    |
| Arl5a    | NA   | 1.23 | 1.09 | 0.9   | 2.37 |
| Arl5b    | NA   | NA   | 0    | 0.07  | 0    |
| Arl5c    | NA   | NA   | NA   | 2.47  | NA   |
| Arl6     | 0.82 | NA   | 1.92 | 2.99  | 0.94 |
| Arl6ip1  | 0.09 | 1.5  | 3.19 | 0     | 2.48 |
| Arl6ip2  | 0.23 | NA   | NA   | NA    | NA   |
| Arl6ip4  | 0.1  | 0.98 | 2.19 | 1.56  | NA   |

|         |      |      |      |      |      |
|---------|------|------|------|------|------|
| Arl6ip5 | 0    | 1.46 | 5.94 | 0    | 1.85 |
| Arl6ip6 | 1.08 | NA   | 1.13 | 0    | 2.57 |
| Arl8a   | NA   | NA   | 0.22 | 1.38 | 2.76 |
| Arl8b   | NA   | 1.11 | 2.31 | 0    | 0.71 |
| Arl9    | 0.53 | NA   | NA   | 0.11 | NA   |
| Armc1   | 0    | 0    | 0.54 | 0.07 | 0    |
| Armc10  | NA   | NA   | 0.24 | 0.72 | 0    |
| Armc12  | NA   | NA   | 1.21 | 0.86 | NA   |
| Armc2   | NA   | NA   | 2.06 | 0.66 | 0    |
| Armc3   | NA   | NA   | 0.17 | 1.15 | 0.68 |
| Armc4   | 0.85 | 0    | 1.51 | 0.57 | 0    |
| Armc5   | 0.73 | NA   | 0.59 | 1.41 | 0.28 |
| Armc6   | 0    | 1.21 | 1.67 | NA   | 0.78 |
| Armc7   | 0.67 | 1.93 | 1.65 | 0.83 | 0    |
| Armc8   | 0.45 | 0.27 | 1.65 | 0    | 0.56 |
| Armc9   | NA   | 0.97 | 0.26 | 0.85 | 0    |
| Armcx1  | 1.36 | 1.53 | 1.29 | 1.76 | 2.54 |
| Armcx2  | 0    | 0    | 1.91 | 0.55 | 0.09 |
| Armcx3  | 0.01 | 0.02 | 2.11 | 0.75 | 0.44 |
| Armcx4  | NA   | NA   | NA   | NA   | 0.36 |
| Armcx5  | NA   | 3.22 | 0.75 | 0    | 2.09 |
| Armcx6  | NA   | 1.51 | 1.25 | 0.7  | NA   |
| Armet   | 4.53 | NA   | NA   | NA   | NA   |
| Arnt    | 0.89 | 1.08 | 1.2  | 0    | 0.7  |
| Arnt2   | 1.31 | 1.4  | 1.39 | 1.29 | 0.59 |
| Arntl   | 1.12 | 0.78 | 0.54 | 0    | 0.84 |
| Arntl2  | 2.1  | 1.94 | 0.44 | 0.51 | 0    |
| Arpc1a  | 0    | 4.95 | 3.58 | 0    | 0.05 |
| Arpc1b  | NA   | 0.29 | 1.17 | 0.61 | 0    |
| Arpc2   | 0    | 0    | 0.05 | 0    | 0    |
| Arpc3   | 0.58 | 1.31 | 3.15 | 0.37 | 0.01 |
| Arpc4   | 0.28 | 1.35 | 6.06 | NA   | 0    |
| Arpc5   | 2.66 | 1    | 0.46 | 0.38 | 0.55 |
| Arpc5l  | 0    | 1.49 | 1.91 | 0.73 | 2.72 |
| Arpm1   | 1.81 | NA   | NA   | NA   | 0.73 |
| Arpp19  | NA   | 0.68 | 1.75 | 0.62 | 0    |
| Arpp21  | NA   | 0    | 0.83 | NA   | NA   |
| Arr3    | 0.44 | 0.54 | 0.45 | 0.74 | 0    |
| Arrb1   | 0.11 | 0    | 2.31 | 0    | 1.48 |
| Arrb2   | 0.24 | 0.02 | 5.33 | 1.39 | 0    |
| Arrdc1  | 0    | NA   | 1.43 | 1.47 | 0.14 |



|        |      |      |      |      |       |
|--------|------|------|------|------|-------|
| Arrdc2 | 0.16 | NA   | 2.29 | 0.8  | 8.65  |
| Arrdc3 | 0.89 | NA   | 1.83 | 1.34 | 0     |
| Arrdc4 | 0.59 | NA   | 0.89 | 0    | 2.54  |
| Ars2   | 0.59 | NA   | NA   | NA   | NA    |
| Arsa   | 1.37 | 2.19 | 2.98 | 0.84 | 2.31  |
| Arsb   | 0.23 | 1.69 | 0.81 | 1.22 | 0     |
| Arsg   | NA   | NA   | 0.82 | 0.43 | NA    |
| Arsi   | NA   | NA   | 0    | 0    | 3.04  |
| Arsj   | NA   | 0.45 | 1.07 | 0.92 | 1.23  |
| Arsk   | NA   | NA   | 1.6  | 1.14 | 0     |
| Art1   | 0    | 1    | 0    | NA   | 0     |
| Art3   | 0.32 | 0.81 | 0.62 | 0.28 | 0.84  |
| Art4   | 2.25 | 2.68 | 1.53 | 5.13 | 1.51  |
| Art5   | 0    | NA   | 0.1  | 2.08 | NA    |
| Artn   | 0.34 | 1.18 | 0.2  | 1.38 | 6.56  |
| Arv1   | NA   | NA   | 0.11 | 0    | 0     |
| Arvcf  | 0.3  | 1.14 | 0.36 | 1.06 | 2.39  |
| Arx    | 1.76 | NA   | 0.7  | 0.87 | 0     |
| As3mt  | 0.78 | NA   | 2.47 | 2.78 | 0.58  |
| Asah1  | 1.03 | 0.43 | 1.6  | 1.35 | 0.31  |
| Asah2  | 0.21 | NA   | NA   | NA   | NA    |
| Asah3  | 1.92 | NA   | NA   | NA   | NA    |
| Asahl  | 1.58 | NA   | NA   | NA   | NA    |
| Asap1  | NA   | 1.11 | 1.31 | 2.96 | 0.64  |
| Asap2  | NA   | 1.12 | 2.17 | 2.83 | 0.31  |
| Asap3  | NA   | 1.68 | 3.56 | 0.16 | 1.28  |
| Asb1   | 2.28 | 0.06 | 0.56 | 0    | 0     |
| Asb10  | 2.6  | NA   | 1.65 | 0.7  | NA    |
| Asb11  | 0.37 | NA   | 4.99 | 3.14 | NA    |
| Asb12  | 0    | NA   | 5.49 | 0.22 | 11.44 |
| Asb13  | 0    | 0    | 2.22 | 0    | 0.25  |
| Asb14  | 1.91 | NA   | 0.84 | 2.2  | 0     |
| Asb15  | 0.46 | NA   | 1.2  | 1.54 | NA    |
| Asb16  | 2.07 | NA   | 0.33 | NA   | NA    |
| Asb17  | 1.18 | NA   | 2.14 | 0    | 0     |
| Asb18  | 1.71 | NA   | NA   | 5.75 | NA    |
| Asb2   | 1.1  | NA   | 0.29 | 2.68 | 8.36  |
| Asb3   | 0.94 | NA   | 0    | NA   | NA    |
| Asb4   | 0.36 | 0.6  | 1.78 | 1.63 | 1.11  |
| Asb5   | 0.89 | NA   | 1.03 | 0    | 1.96  |
| Asb6   | 0.86 | 1.11 | 1.5  | 1.31 | 0     |

|         |      |      |      |      |      |
|---------|------|------|------|------|------|
| Asb7    | 0    | 0.11 | 0.78 | 3.57 | 0.29 |
| Asb8    | 0.5  | 2.01 | 1.26 | 0.58 | 0.55 |
| Asb9    | 0    | 0    | 0.72 | 0.97 | 0    |
| Ascc1   | 0    | 3.16 | 2.73 | 0    | 2.76 |
| Ascc2   | NA   | 0    | 0    | 1.15 | 3.27 |
| Ascc3   | NA   | 1.42 | 0.44 | 0    | 3.72 |
| Ascc311 | 0.62 | NA   | NA   | NA   | NA   |
| Ascl1   | 0    | 0.85 | 0.81 | 1.19 | 2.16 |
| Ascl2   | 0    | 1.3  | 0.31 | 3.35 | 0    |
| Ascl3   | 0.84 | 1.67 | 0.01 | 0.43 | 0    |
| Ascl4   | NA   | NA   | NA   | 0.7  | NA   |
| Asfla   | 0.23 | 0.07 | 0.85 | 0.83 | 0    |
| Asflb   | 0.06 | 0    | 1.82 | 0.89 | 0    |
| Asgr1   | 0    | 3.26 | 2    | 0.88 | 0    |
| Asgr2   | 0.49 | 2.4  | 1.07 | 1.52 | 0.24 |
| Ash11   | 0.35 | 0    | 0.83 | NA   | 0.52 |
| Ash21   | 0    | 1.29 | 1.39 | 1.04 | 0    |
| Asic1   | NA   | 1.57 | 0.57 | 0.04 | NA   |
| Asic2   | NA   | 1.3  | 5.48 | 0.81 | NA   |
| Asic3   | NA   | 0.18 | 2.33 | 0.64 | NA   |
| Asic4   | NA   | 0    | 0.53 | 1.01 | NA   |
| Asic5   | NA   | NA   | 2.56 | 0.78 | NA   |
| Asl     | 0.56 | 1.93 | 3.3  | 0.09 | 0    |
| Asna1   | 0.08 | 1.2  | 0.81 | 1.11 | 0    |
| Asns    | 2.25 | 2.91 | 2.36 | 0.72 | 1.4  |
| Asnsd1  | NA   | 1.91 | 1.63 | 0.37 | 1.35 |
| Aspa    | 0.53 | 1.58 | 0.8  | 1.15 | 2.42 |
| Aspdh   | NA   | NA   | 2.53 | 1.11 | 2.4  |
| Aspg    | NA   | NA   | 2.01 | 2.16 | NA   |
| Asph    | 0.34 | 0    | 1.82 | 2.23 | 0.91 |
| Asphd1  | NA   | 1.44 | 3.26 | 0.02 | 4.86 |
| Asphd2  | NA   | NA   | 2.26 | 0.15 | 0.82 |
| Aspm    | NA   | 1.29 | 3.03 | 0    | 0.8  |
| Aspn    | 1.22 | 0.8  | 0.41 | 0.46 | 0.81 |
| Asprv1  | NA   | NA   | 0.82 | 1.57 | 0    |
| Aspser1 | 0    | 0    | 2.71 | 0    | 1.72 |
| Asrgl1  | 0    | 0.84 | 1.31 | 0.54 | 2.2  |
| Ass1    | 0.08 | 0    | 1.44 | NA   | 0    |
| Aste1   | NA   | 2.32 | 2.24 | 1.65 | 3.95 |
| Astl    | 1.99 | NA   | NA   | 1.02 | NA   |
| Astn1   | 0.56 | 2.06 | 1.42 | 2.05 | 0.92 |

|         |      |      |      |      |       |
|---------|------|------|------|------|-------|
| Astn2   | 0.35 | 1.28 | 1.67 | 1.35 | 6.45  |
| Asun    | NA   | 0.45 | 1.38 | 2.11 | NA    |
| Asxl1   | 0.48 | 2.25 | 1.05 | 0    | 2.99  |
| Asxl2   | 0.37 | 1.12 | 0.35 | 0    | 0     |
| Asxl3   | NA   | NA   | 0.1  | 1.69 | 1.98  |
| Asz1    | 5.87 | NA   | 0.66 | 9.08 | NA    |
| Atad1   | 0.99 | NA   | 1.24 | 0.78 | 1.38  |
| Atad2   | 0.1  | 1.01 | 1.46 | 0    | 0.87  |
| Atad2b  | NA   | 1.85 | 0.17 | 0.43 | 0     |
| Atad3a  | 0    | 1.67 | 0.51 | 1.95 | 0     |
| Atad5   | NA   | 1.67 | 0.96 | 0.82 | 0     |
| Atat1   | NA   | 1.16 | 1.77 | 0    | NA    |
| Atbfl   | 0    | NA   | NA   | NA   | NA    |
| Atcay   | 3.48 | NA   | 1.35 | 1.17 | 0.24  |
| Ate1    | 0.55 | NA   | 0.06 | 1.46 | 0     |
| Atf1    | 0.14 | 3.15 | 2.52 | 0.06 | 0     |
| Atf2    | 0    | 0.6  | 0.46 | 2.2  | 1.04  |
| Atf3    | 0.07 | 0.58 | 1.63 | 1.17 | 11.87 |
| Atf4    | 2.31 | 1.25 | 1.77 | 0    | 0     |
| Atf5    | 0.57 | 0.86 | 0.75 | NA   | 0     |
| Atf6    | 0.5  | 0.1  | 0.56 | 1.56 | 0.95  |
| Atf6b   | NA   | 1.77 | 0    | NA   | 0.15  |
| Atf7    | 1.29 | 1.31 | 1.03 | 2.31 | 1.67  |
| Atf7ip  | 1.3  | 0.64 | 0.55 | 1.47 | 1.4   |
| Atf7ip2 | 0.36 | 2.6  | 1.21 | 2.05 | 3.09  |
| Atg10   | NA   | 1.63 | 0.8  | 1.86 | 3.12  |
| Atg12   | NA   | 1.99 | 1.58 | 0.81 | 0     |
| Atg13   | NA   | 0    | 0.57 | 6.12 | NA    |
| Atg14   | NA   | NA   | NA   | 0    | NA    |
| Atg16l1 | NA   | 0    | 0    | 1.06 | 3.17  |
| Atg16l2 | NA   | NA   | 0.04 | 0.18 | 5.14  |
| Atg2a   | NA   | 0    | 0.86 | 0.09 | 0     |
| Atg2b   | NA   | 0.41 | 0.42 | 0    | 2.14  |
| Atg3    | NA   | 0    | 2.27 | 0.1  | 0     |
| Atg4a   | NA   | 2.65 | 0.99 | 0.9  | 0.58  |
| Atg4b   | NA   | 0.19 | 1.85 | 0.32 | 2.01  |
| Atg4c   | NA   | NA   | 1.69 | 1.01 | NA    |
| Atg4d   | NA   | NA   | 1.37 | 1    | 1.11  |
| Atg5    | NA   | 1.16 | 1.66 | 0.07 | 3.61  |
| Atg7    | NA   | 0    | 1.22 | 0    | 0     |
| Atg9a   | NA   | 1.39 | 3.87 | 0    | 0.3   |

|         |      |      |      |      |      |
|---------|------|------|------|------|------|
| Atg9b   | NA   | NA   | 0.87 | 1.62 | 1.33 |
| Ath11   | NA   | 1.87 | 0.67 | 0    | 0    |
| Atic    | 0.25 | 0.74 | 0.36 | 2.3  | 0    |
| Atl1    | NA   | NA   | 2.92 | 1.27 | 1.74 |
| Atl2    | NA   | NA   | 0.2  | 0.57 | 1.31 |
| Atl3    | NA   | NA   | 0.87 | 1.17 | 0.69 |
| Atm     | 0    | 0    | 0    | NA   | 1.75 |
| Atmin   | NA   | 0.07 | 1.12 | 0.41 | 0    |
| Atoh1   | 0.26 | 3.13 | 0    | 0.18 | 0    |
| Atoh7   | 0.91 | NA   | 0    | 1.63 | NA   |
| Atoh8   | 1.1  | NA   | 1.59 | 0.75 | 2.44 |
| Atox1   | 1.65 | 0    | 0.83 | 0.46 | 0    |
| Atp10a  | 0.4  | 1.49 | 0.48 | 3.1  | 0.73 |
| Atp10b  | NA   | 0    | 1.1  | 0.65 | 1.51 |
| Atp10d  | 1.26 | 0.95 | 0.4  | 0    | 3.53 |
| Atp11a  | 0.03 | 0.73 | 0.32 | 0    | 0    |
| Atp11b  | 0    | 0    | 1.25 | 1.35 | 0    |
| Atp11c  | 0.53 | NA   | 1.39 | 0    | 0.98 |
| Atp12a  | 3.48 | 1.9  | 2.91 | 1.48 | 5.8  |
| Atp13a1 | NA   | 0    | 0.78 | 1.88 | 0    |
| Atp13a2 | NA   | 0.78 | 2.98 | 0    | 0    |
| Atp13a3 | NA   | 0.01 | 1.71 | 0    | 0.58 |
| Atp13a4 | NA   | NA   | 0.84 | 0.13 | NA   |
| Atp13a5 | NA   | NA   | 0.97 | 0    | 0    |
| Atp1a1  | 0.2  | 2.82 | 1.47 | 2.81 | 3.92 |
| Atp1a2  | 1.12 | 0.58 | 0.52 | 0    | 1.6  |
| Atp1a3  | NA   | 1.19 | 1.05 | 0.68 | 2.15 |
| Atp1a4  | 7.38 | NA   | 1.29 | 0.01 | NA   |
| Atp1b1  | 0.06 | 0.94 | 0.34 | 2.48 | 2.11 |
| Atp1b2  | 0.07 | 1.17 | 3.25 | 1.99 | 2.38 |
| Atp1b3  | 0.98 | 1.81 | 1.94 | 0.9  | 0.25 |
| Atp1b4  | 6.07 | 1.27 | 1.29 | 2.72 | 0    |
| Atp2a1  | 0    | 0.82 | 1.24 | 0    | 0    |
| Atp2a2  | 0.65 | 0.65 | 0.2  | 0    | 0.74 |
| Atp2a3  | 0.38 | 0    | 2.38 | 0.15 | 0.54 |
| Atp2b1  | NA   | 2.26 | 0.07 | 0    | 2.29 |
| Atp2b2  | 0.53 | 0.38 | 0.31 | 0.98 | 1.23 |
| Atp2b3  | 0.47 | 1.53 | 1.38 | 0.76 | 7.27 |
| Atp2b4  | NA   | 0.73 | 1.02 | 0    | 0    |
| Atp2c1  | 0    | 0.73 | 1.59 | 0.93 | 1.39 |
| Atp2c2  | NA   | 4.35 | 0    | 0.11 | 0    |

|          |      |      |      |      |      |
|----------|------|------|------|------|------|
| Atp4a    | 0    | 0    | 0.17 | 0.89 | 0    |
| Atp4b    | 0    | 1.28 | 1.98 | 1.48 | 0    |
| Atp5a1   | 0    | 0    | 1.16 | 0.03 | 0    |
| Atp5b    | 0.23 | 1.43 | 0.58 | 0.14 | 0    |
| Atp5c1   | 0.04 | 1.13 | 0.82 | 1.5  | 0    |
| Atp5d    | 0.15 | 1.94 | 2.67 | 0.79 | 0    |
| Atp5e    | 0    | 0.94 | 1.81 | 0.89 | 0    |
| Atp5f1   | 0    | 0    | 1.53 | 1.1  | 3.51 |
| Atp5g1   | 0.38 | 1.74 | 0.6  | 0.43 | 0    |
| Atp5g2   | 0    | 0    | 0    | 0    | 0    |
| Atp5g3   | 0.26 | 1.59 | 0.96 | 0    | 0.01 |
| Atp5h    | 0.19 | 1.58 | 1.99 | 0    | 0    |
| Atp5j    | 0    | 0    | 0.74 | NA   | 1.28 |
| Atp5j2   | 0.13 | 1.71 | 1.7  | 0.07 | 0.16 |
| Atp5l    | 0    | NA   | NA   | 0.71 | NA   |
| Atp5o    | 0.29 | 0    | 0.19 | 0    | NA   |
| Atp5s    | 0.74 | 2.04 | 0.55 | 0    | 0    |
| Atp5sl   | NA   | 2.76 | 0.23 | 0.79 | 0    |
| Atp6ap1  | 0.3  | 1.4  | 0.15 | 1.32 | 5.16 |
| Atp6ap1l | NA   | NA   | NA   | 1.39 | NA   |
| Atp6ap2  | 0.41 | 1.13 | 2.49 | 0.78 | 0    |
| Atp6v0a1 | 0    | 0    | 0.25 | 3.4  | 2.11 |
| Atp6v0a2 | 0    | 0.83 | 0.81 | 1.46 | 0    |
| Atp6v0a4 | 0.43 | 1.11 | 0    | 2.68 | 2    |
| Atp6v0b  | 1.79 | 0    | 0.53 | 0.81 | 1.64 |
| Atp6v0c  | 0    | 2.71 | 3.06 | 0.36 | 0.32 |
| Atp6v0d1 | 0    | 1.32 | 3.26 | 1.64 | 1.11 |
| Atp6v0d2 | 3.42 | NA   | 1.49 | 0.61 | NA   |
| Atp6v0e2 | NA   | 0    | 0.65 | 1.33 | 0    |
| Atp6v1a  | NA   | 2.66 | 1.07 | 1.97 | 3.39 |
| Atp6v1b1 | 1.21 | 0.08 | 0    | 2.96 | 2.16 |
| Atp6v1b2 | 0.02 | 0.75 | 2.04 | 0.63 | 3.3  |
| Atp6v1c1 | 0.1  | 0    | 1.45 | 0.17 | 5.87 |
| Atp6v1c2 | 0    | NA   | 3.94 | 1.12 | NA   |
| Atp6v1d  | 1.12 | 0    | 0.9  | 0.97 | 1.46 |
| Atp6v1e1 | 1.24 | 0    | 1.07 | 1.56 | 0.57 |
| Atp6v1e2 | 0    | NA   | 1.34 | 0.64 | NA   |
| Atp6v1f  | 1.11 | 2.2  | 1.7  | 0    | 0    |
| Atp6v1g1 | 1.31 | 0    | 0.46 | 1.7  | 2.92 |
| Atp6v1g2 | 0.18 | 3.2  | 0.83 | NA   | 3.3  |
| Atp6v1g3 | 0    | NA   | NA   | 2.47 | NA   |

|          |      |      |      |      |      |
|----------|------|------|------|------|------|
| Atp6v1h  | 0    | 0.07 | 1.87 | 0.96 | 0    |
| Atp7a    | 1.24 | 1.64 | 2.72 | 1.69 | 0    |
| Atp7b    | 0.39 | 0.59 | 1    | 0.51 | 0    |
| Atp8a1   | 0.65 | 0.89 | 1.09 | 1.33 | 0.06 |
| Atp8a2   | 0.76 | 0    | 0.54 | 1.38 | 0.9  |
| Atp8b1   | 0.34 | 1.37 | 2.17 | 0    | 0    |
| Atp8b2   | 1.15 | 1.51 | 0.67 | 1.66 | 1.72 |
| Atp8b3   | 0    | 1.53 | 0.32 | 0.19 | 3.35 |
| Atp8b4   | 0    | 0.79 | 0.21 | 0.59 | 0.52 |
| Atp9a    | 0    | 0.6  | 0.06 | 0    | 0    |
| Atp9b    | 0.47 | 0.76 | 0.84 | 0    | 0    |
| Atpaf1   | 4.3  | NA   | 1.55 | 0.62 | 0    |
| Atpaf2   | 0.05 | 0    | 1.31 | 0.71 | 1.69 |
| Atpbd4   | NA   | NA   | NA   | NA   | 1.47 |
| Atpif1   | 0.12 | 1.5  | 0.88 | 1.05 | 0    |
| Atr      | 0.24 | 0    | 1.08 | 0    | 1.98 |
| Atraid   | NA   | 2.21 | 1.93 | 2.36 | NA   |
| Atrip    | NA   | NA   | 1.37 | 2.89 | NA   |
| Atrn     | 0.05 | 1.62 | 1.29 | 0    | 2.23 |
| Atrnl1   | 0.3  | 1.9  | 1.05 | 0.37 | 2.31 |
| Atrx     | 0.15 | 0.39 | 0.82 | 0    | 0.07 |
| Atxn1    | NA   | 0.59 | 2.07 | 1.06 | 0    |
| Atxn10   | NA   | 2.16 | 1.76 | 0.42 | 3.23 |
| Atxn11   | NA   | NA   | 0.01 | NA   | 1.28 |
| Atxn2    | NA   | 0    | 0.94 | 1.4  | 0    |
| Atxn2l   | NA   | 0.27 | 0.02 | 1.74 | 1.06 |
| Atxn3    | NA   | 1.08 | 1.65 | 1.66 | 1.35 |
| Atxn7    | NA   | 0.86 | 0.87 | 1.73 | 0    |
| Atxn7l1  | NA   | 0.67 | 1.51 | 0.88 | 1.18 |
| Atxn7l2  | 0    | NA   | 0.82 | 2.12 | 0    |
| Atxn7l3  | NA   | NA   | 3.58 | 1.68 | 2.97 |
| Atxn7l3b | NA   | 1.27 | 0.95 | 0.39 | NA   |
| Atxn7l4  | 0    | NA   | NA   | NA   | NA   |
| Auh      | 0.21 | 1.41 | 0.18 | 0.11 | 0    |
| Aup1     | 0.49 | 1.89 | 1.49 | 2.5  | 2.01 |
| Aurka    | NA   | 0.32 | 2.66 | 0.39 | 1.62 |
| Aurkaip1 | NA   | 0    | 2.77 | 1.35 | 0    |
| Aurkb    | 0.9  | 0.52 | 2.69 | 0.31 | 3.89 |
| Aurkc    | 1.62 | 2    | 2.08 | 2.13 | 2.68 |
| Auts2    | NA   | 0.9  | 0.6  | 0    | 0    |
| Aven     | 1.12 | 1.29 | 1.85 | 1.22 | 0    |

|          |      |      |      |      |      |
|----------|------|------|------|------|------|
| Avil     | 0    | 0.09 | 3.76 | 0    | 3.66 |
| Avl9     | NA   | 1    | 0.5  | 0    | 0    |
| Avp      | 0    | 1.6  | 0.25 | 2.65 | 0.04 |
| Avpi1    | 0.2  | 3.93 | 4.1  | 1.91 | 5.68 |
| Avpr1a   | 0    | 0.73 | 1.2  | 1.1  | 0    |
| Avpr1b   | 1.32 | 1.69 | 1.31 | 2.18 | 0    |
| Avpr2    | 0.29 | 0.33 | 1.98 | NA   | 0    |
| Awat1    | NA   | NA   | NA   | 0.76 | NA   |
| Awat2    | NA   | NA   | NA   | 3.87 | NA   |
| Axdnd1   | NA   | NA   | 0    | 0.03 | NA   |
| Axin1    | NA   | 0    | 3.88 | 1.39 | NA   |
| Axin2    | 2.59 | NA   | 0    | 0    | 1.34 |
| Axl      | 0    | 0.8  | 1.87 | 4.44 | 0    |
| Axud1    | 0.09 | NA   | NA   | NA   | NA   |
| Azgp1    | 1.69 | 1.62 | 0.5  | 2.3  | 3.68 |
| Azi1     | 0.12 | 0.23 | 3.16 | 0.31 | 0    |
| Azi2     | 0.71 | 1.8  | 3.01 | NA   | 0    |
| Azin1    | NA   | 1.69 | 1.42 | 3.56 | 4.41 |
| B2m      | 0.24 | 0.14 | 1.78 | 6.2  | 0.75 |
| B3galnt1 | NA   | 0.28 | 1.07 | 0.26 | 0    |
| B3galnt2 | NA   | NA   | 0    | 2.28 | 0    |
| B3galt1  | 0.47 | 0.56 | 0    | 0.98 | 2.57 |
| B3galt2  | 0    | 0.77 | 0.59 | 0.91 | 0.18 |
| B3galt3  | 1.06 | NA   | NA   | NA   | NA   |
| B3galt4  | 0    | 3.84 | 1.19 | 1.25 | 0    |
| B3galt5  | 0    | 0.16 | 0.92 | 2.66 | 0    |
| B3galt6  | 0    | NA   | 2.65 | 0.84 | 0.51 |
| B3galtl  | NA   | NA   | 1.8  | 0.68 | 0.46 |
| B3gat1   | 0.01 | 1.11 | 0.37 | 2.01 | 0.21 |
| B3gat2   | 0    | NA   | 0.82 | 0.53 | 0.69 |
| B3gat3   | 2.44 | 0.82 | 2.1  | 1.45 | 1.02 |
| B3gnt1   | 0    | 0    | 2.12 | 0.39 | 0.95 |
| B3gnt2   | NA   | 0.79 | 1.29 | 0    | 0.42 |
| B3gnt3   | 3.84 | 1.51 | 2    | 0.47 | 0    |
| B3gnt4   | 0    | 1.34 | 1.26 | 0    | 2.67 |
| B3gnt5   | 0    | NA   | 0.76 | 0.04 | 2.78 |
| B3gnt6   | 0.21 | NA   | 1.81 | 2.09 | NA   |
| B3gnt7   | 1.6  | NA   | 0    | 0.25 | 0.51 |
| B3gnt8   | NA   | NA   | 4.39 | 0.77 | 1.68 |
| B3gnt9   | NA   | NA   | 3.6  | 1.03 | 0    |
| B3gntl1  | NA   | 2.5  | 1.52 | 1.15 | 1.6  |

|          |      |      |      |      |      |
|----------|------|------|------|------|------|
| B4galnt1 | NA   | 1.21 | 3.17 | 1.01 | 2.15 |
| B4galnt2 | NA   | NA   | 0.8  | 1.98 | NA   |
| B4galnt3 | NA   | NA   | NA   | 2.27 | NA   |
| B4galnt4 | NA   | NA   | 0.77 | 3.13 | 0    |
| B4galt1  | 0.89 | 0.05 | 3.24 | 1.73 | 0    |
| B4galt2  | 0.85 | 2.4  | 0.79 | NA   | 0    |
| B4galt3  | 0    | 3.06 | 2.79 | 2.39 | 1.69 |
| B4galt4  | 1.83 | 0    | 0.64 | 2.78 | 3.58 |
| B4galt5  | 0    | 0    | 1.74 | 1.93 | 0    |
| B4galt6  | 1.13 | 1.17 | 1.81 | 0.33 | 0    |
| B4galt7  | 0.31 | 0    | 0.96 | 2.41 | 0    |
| B9d1     | NA   | 1.5  | 0.01 | 2.06 | 5.24 |
| B9d2     | NA   | 0    | 4.37 | NA   | 0    |
| Baalc    | 0.62 | 1.4  | 1.81 | 2.32 | 1.32 |
| Baat     | 2.99 | 1.57 | 0    | 0.17 | 1.33 |
| Babam1   | NA   | 0    | 3.58 | 0    | NA   |
| Bace1    | 2.48 | 1.13 | 0.33 | 2.09 | 0.01 |
| Bace2    | 1.33 | 0    | 0.46 | 1.44 | 0.06 |
| Bach1    | 0.85 | 2.13 | 1.4  | 1.26 | 0    |
| Bach2    | 3.02 | 0    | 2.43 | 1.31 | 1.86 |
| Bad      | 0    | 0    | 0.58 | NA   | 1.07 |
| Bag1     | 0.22 | 0    | 1.04 | 1.44 | 1.69 |
| Bag2     | 1.67 | 0.42 | 1.18 | 0.64 | 2.37 |
| Bag3     | 0    | 2.14 | 1.84 | 0.08 | 0    |
| Bag4     | 0    | 2.5  | 0.52 | 1.2  | 1.5  |
| Bag5     | 0.71 | 0.44 | 0.15 | 0.93 | NA   |
| Bag6     | NA   | 0    | 2.29 | 1.44 | NA   |
| Bahcc1   | NA   | 2.93 | 0.96 | 1.47 | 6.45 |
| Bahd1    | NA   | 0    | 0.12 | 1    | 0    |
| Bai1     | 1.02 | 2.46 | 2.46 | 1.28 | 1.86 |
| Bai2     | 0.9  | 1.55 | 0.77 | 0    | NA   |
| Bai3     | 0.62 | 0.12 | 0.54 | 1.06 | 2.63 |
| Baiap2   | 0    | 0.54 | 1.84 | 0    | 0    |
| Baiap2l1 | NA   | NA   | 0.31 | 0.05 | 1.08 |
| Baiap2l2 | NA   | NA   | NA   | 0.97 | NA   |
| Baiap3   | NA   | 0.94 | 1.79 | 0.21 | 2.25 |
| Bak1     | 2.64 | 2.24 | 0.26 | 1.33 | 0.51 |
| Bambi    | 0.28 | 0.74 | 2.5  | 0.23 | 2.06 |
| Banf1    | 0.15 | 2.49 | 0.12 | 0    | 2.45 |
| Banf2    | NA   | NA   | 1.2  | 0.94 | 1.23 |
| Bank1    | 0.08 | 0    | 3.63 | 0    | 0    |



|        |      |      |      |      |      |
|--------|------|------|------|------|------|
| Banp   | NA   | 0    | 4.57 | 3.98 | 1.49 |
| Bap1   | 0    | 0.18 | 2.7  | 1.83 | 1.07 |
| Bapx1  | 0.59 | NA   | NA   | NA   | NA   |
| Bard1  | 0.37 | 1.54 | 3.09 | 0.74 | 1.43 |
| Barhl1 | 1.49 | NA   | 2.55 | 1.96 | 2.65 |
| Barhl2 | NA   | NA   | NA   | 2.45 | NA   |
| Barx1  | 0.18 | 4.14 | 0.33 | 1.47 | 0    |
| Barx2  | 2.36 | 1.84 | 0.86 | 0.5  | 0.43 |
| Baspl  | 0.59 | 0.46 | 1.21 | 0.59 | NA   |
| Bat2   | 2.89 | NA   | NA   | NA   | 0    |
| Bat2l  | NA   | NA   | NA   | NA   | 1.65 |
| Bat3   | 2.76 | NA   | NA   | NA   | 2.86 |
| Bat4   | 0.24 | NA   | NA   | NA   | 1.11 |
| Bat5   | 0    | NA   | NA   | NA   | 1.72 |
| Batf   | 0.49 | 0.01 | 2.93 | 2.02 | 0    |
| Batf2  | NA   | NA   | 1.91 | 1.05 | 0    |
| Batf3  | NA   | 0    | 1.09 | 0    | 4.19 |
| Bax    | 1.53 | 1.61 | 1.59 | 1.92 | 0    |
| Baz1a  | 0    | 0    | 0.24 | 0    | 0    |
| Baz1b  | 0.24 | 0.39 | 0.54 | 0.06 | 0.01 |
| Baz2a  | 0.46 | 0.77 | 0.54 | 1.07 | 0.94 |
| Baz2b  | NA   | 0.34 | 1.44 | 0.33 | 1.01 |
| Bbc3   | 0.83 | 1.86 | 2.21 | 1.58 | 0.68 |
| Bbox1  | 0.57 | 2.88 | 0.08 | 0    | 1.99 |
| Bbs1   | 0    | 6.32 | 3.92 | NA   | 2.3  |
| Bbs10  | NA   | 2.11 | 1.19 | 1.2  | 0    |
| Bbs12  | NA   | NA   | 2.39 | 0.93 | 1.37 |
| Bbs2   | 1.19 | NA   | 2.21 | 0    | 2.41 |
| Bbs4   | 0.02 | 1.01 | 0    | 0.75 | 0.87 |
| Bbs5   | NA   | NA   | 1.94 | 0    | 2.24 |
| Bbs7   | 2.66 | 0.19 | 0.74 | 0.85 | 0.65 |
| Bbs9   | NA   | 0    | 0.41 | 1.15 | 1.64 |
| Bbx    | 0    | 1.17 | 1.34 | 1.48 | 1.76 |
| Bcam   | NA   | 1.43 | 0.05 | 0.07 | 5.18 |
| Bcan   | 0.29 | 0.88 | 0.97 | 2.81 | 0    |
| Bcap29 | 0.28 | 0    | 0.53 | 0.04 | 0    |
| Bcap31 | 0    | 1.41 | 1.28 | 0.37 | 0.96 |
| Bcar1  | 0.7  | NA   | 1.4  | 1.25 | 0.68 |
| Bcar3  | 0.47 | 1.82 | 0.53 | 2.94 | 0    |
| Bcas1  | 1.34 | 0    | 0.93 | 5.3  | 1.41 |
| Bcas2  | 0.86 | 1.15 | 0.42 | 0.66 | 0    |

|         |      |      |      |      |      |
|---------|------|------|------|------|------|
| Bcas3   | 0.51 | 0.23 | 2.24 | 0.17 | 0    |
| Bcat1   | 0.51 | 0    | 3.78 | 0.59 | 0.64 |
| Bcat2   | 0    | 1.77 | 1.04 | 3.79 | 1.18 |
| Bccip   | 0    | 0    | 1.44 | 0.53 | 0    |
| Bcdin3d | NA   | NA   | 3.26 | 2.72 | 1.68 |
| Bcdo2   | 2.48 | NA   | NA   | NA   | NA   |
| Bche    | 1.44 | 0.82 | 0.8  | 0.46 | 1.51 |
| Bckdha  | 0.23 | 0    | 6.3  | 3.64 | 0    |
| Bckdhb  | 0    | 0    | 1.15 | 0.79 | 0    |
| Bckdk   | 1.06 | 1.38 | 2.16 | 0.77 | 0.54 |
| Bcl10   | 0.45 | 0.87 | 1.13 | 3.98 | 0.83 |
| Bcl11a  | 0.55 | 0    | 1.93 | 0.83 | 1.77 |
| Bcl11b  | 0.49 | 0    | 0.39 | 2.58 | 1.49 |
| Bcl2    | 0.27 | 0.03 | 1.86 | 1.46 | 0.71 |
| Bcl2l1  | 0.33 | 0    | 1.39 | 1.61 | 3.38 |
| Bcl2l10 | 0.15 | 1.05 | 1.69 | 1.31 | 2.68 |
| Bcl2l11 | 0.54 | 1.15 | 1.66 | 0.53 | 0.57 |
| Bcl2l12 | 0    | NA   | 0.52 | 0.1  | 0.6  |
| Bcl2l13 | 1.27 | 0    | 0.41 | 1.13 | 0.97 |
| Bcl2l14 | 0.38 | 1.37 | 0.74 | 3.37 | 0    |
| Bcl2l15 | NA   | NA   | 0.1  | 3.11 | 0    |
| Bcl2l2  | 0.9  | 0.83 | 1.73 | 0.79 | 0    |
| Bcl3    | 1.77 | 1.49 | 2.85 | 0.15 | 0    |
| Bcl6    | 0    | 0.05 | 2.28 | 0    | 0    |
| Bcl6b   | 0    | NA   | 1.67 | 0.25 | 0    |
| Bcl7a   | 0.75 | 0    | 1.73 | 1.84 | 0.81 |
| Bcl7b   | 0    | 2.05 | 2.01 | 1.27 | 0    |
| Bcl7c   | 0.04 | 0.57 | 0.83 | 0.25 | 0.44 |
| Bcl9    | 0    | 0    | 1.24 | 1.54 | 1.85 |
| Bcl9l   | 0.99 | NA   | 1.55 | 0    | 0    |
| Bclaf1  | 0    | 0.64 | 1.13 | 0.87 | 0.87 |
| Bcmo1   | 2.8  | 2.46 | 0    | 0.43 | 1.92 |
| Bco2    | NA   | NA   | 2.92 | 4.04 | 0    |
| Bcor    | 0.21 | 0    | 0.84 | 3.61 | 2.76 |
| Bcorl1  | 0.26 | 2.27 | 1.61 | 2.51 | 0    |
| Bcr     | 0.39 | 0    | 0.67 | 1.04 | 1.48 |
| Bcs11   | 0.31 | 2.5  | 3.12 | 0.81 | 6.31 |
| Bdh1    | NA   | 0    | 0.68 | 1.42 | 0.62 |
| Bdh2    | NA   | 0    | 1.68 | 0.54 | 0    |
| Bdkrb1  | 0.97 | 1.62 | 0.56 | 0    | 6.58 |
| Bdkrb2  | 0    | 0.42 | 0.82 | 2.63 | 1.94 |

|         |      |      |      |      |      |
|---------|------|------|------|------|------|
| Bdnf    | 0.25 | 1.92 | 1.68 | 0    | 0.8  |
| Bdp1    | NA   | NA   | 1.93 | 2.5  | 0    |
| Bean    | 1.82 | NA   | NA   | NA   | 0.9  |
| Bean1   | NA   | 1.37 | 0.37 | 0.7  | NA   |
| Becn1   | 0.16 | 0.66 | 0.61 | NA   | 0.89 |
| Begain  | NA   | NA   | NA   | 1.15 | NA   |
| Bend3   | NA   | NA   | 1.51 | 2.74 | 2.01 |
| Bend4   | NA   | NA   | 0.36 | 1.89 | 0    |
| Bend5   | NA   | 0.14 | 1.03 | 1.41 | 0    |
| Bend6   | NA   | NA   | 0    | 0.11 | 0    |
| Bend7   | NA   | NA   | 1.29 | 0.44 | 0    |
| Best1   | NA   | 2.79 | 1.3  | 1.47 | 0    |
| Best2   | NA   | 0.71 | 0.21 | 0.99 | 0    |
| Best3   | NA   | NA   | NA   | 0.04 | NA   |
| Bet1    | 0    | 1.54 | 2.27 | 0.75 | 0    |
| Bet11   | 0.61 | 3.07 | 0.65 | 1.69 | 0    |
| Bex1    | NA   | 0.06 | 5.16 | 0    | 0    |
| Bex2    | NA   | NA   | 3.76 | 1.89 | 4.73 |
| Bex4    | NA   | 1.08 | 0.41 | 0.88 | 2.29 |
| Bfar    | 0.51 | 0    | 2.7  | 1.29 | 1.42 |
| Bfsp1   | 2.66 | 0.97 | 1.15 | 1.67 | NA   |
| Bfsp2   | 1.45 | 2.81 | 0.3  | 1.8  | 0    |
| Bglap   | NA   | NA   | NA   | 1.05 | NA   |
| Bgn     | 0.2  | 0.77 | 2.17 | 0.26 | 0    |
| Bhlha15 | NA   | NA   | NA   | 1.29 | NA   |
| Bhlha9  | NA   | NA   | NA   | 2.1  | NA   |
| Bhlhb2  | 0.44 | NA   | NA   | NA   | NA   |
| Bhlhb3  | 1.2  | NA   | NA   | NA   | NA   |
| Bhlhb4  | 0    | NA   | NA   | NA   | NA   |
| Bhlhb5  | 0    | NA   | NA   | NA   | NA   |
| Bhlhb9  | 0.13 | 0.23 | 1.47 | 1.4  | 3.23 |
| Bhlhe22 | NA   | NA   | 0.55 | 0    | 0    |
| Bhlhe23 | NA   | NA   | 0.76 | 1.65 | 0    |
| Bhlhe40 | NA   | 2.91 | 3.42 | 0.04 | 2.62 |
| Bhlhe41 | NA   | 0    | 0.44 | 1.65 | 2.01 |
| Bhmt    | 0.75 | 1.82 | 0.31 | 1.62 | 3.23 |
| Bhmt2   | 1.62 | 1.52 | 0.71 | 1.99 | 0.93 |
| Bicc1   | 1.06 | 0.51 | 0.91 | 3.15 | 1.1  |
| Bicd1   | 1.17 | 1.98 | 0.6  | 1.91 | 1.08 |
| Bicd2   | 0.44 | 0.25 | 1.62 | 8.64 | 1.87 |
| Bid     | 0.7  | 3.67 | 3.15 | 1.08 | 3.28 |

|         |      |      |      |      |      |
|---------|------|------|------|------|------|
| Bik     | NA   | 0.9  | 4    | 0.69 | 1.84 |
| Bin1    | 0    | 0    | 0.71 | 0.26 | 1.54 |
| Bin2    | NA   | NA   | NA   | 1.48 | NA   |
| Bin3    | 0    | 0.09 | 0.63 | 0    | 0    |
| Birc2   | 0    | 2.28 | 4.56 | 0    | 0    |
| Birc3   | 0.02 | 2.52 | 0.77 | 1.09 | 0.36 |
| Birc4   | 0.76 | NA   | NA   | NA   | NA   |
| Birc5   | 0.62 | 1.12 | 2.92 | 1.31 | 2.18 |
| Birc6   | 0.26 | NA   | 0.43 | 1.3  | 2.01 |
| Birc7   | 0.9  | 2.38 | 0.92 | 1.57 | 2.44 |
| Bivm    | 0    | NA   | 1.36 | 0.23 | 0.88 |
| Blcap   | 1.23 | 2.38 | 3.04 | 2.95 | 8.75 |
| Blk     | 1.68 | 0.32 | 0.45 | 0.95 | 0    |
| Blm     | 0.07 | 1.46 | 2.92 | 0    | 1.68 |
| Blmh    | 0.86 | 0    | 1.65 | 0.91 | 0    |
| Blnk    | 0.15 | 0    | 1.9  | 0    | 1.8  |
| Bloc1s1 | 0    | NA   | NA   | 0    | 0    |
| Bloc1s2 | 0.42 | NA   | 0.82 | 0    | 0    |
| Bloc1s3 | 0.28 | NA   | 1.77 | 0.91 | 1.93 |
| Bloc1s4 | NA   | NA   | 1.38 | 1.3  | NA   |
| Bloc1s5 | NA   | NA   | 0.74 | NA   | NA   |
| Bloc1s6 | NA   | NA   | 0.08 | 0.63 | NA   |
| Blr1    | 0.29 | NA   | NA   | NA   | NA   |
| Blvra   | 0.43 | 0    | 1.66 | 1.98 | 0.5  |
| Blvrb   | 0.42 | 0.99 | 0.01 | 0.89 | 0    |
| Blzfl   | 3.62 | 0.52 | 1.76 | 0.86 | 0    |
| Bmf     | 0    | NA   | 1.52 | 0.35 | 1.74 |
| Bmi1    | 0    | 0.02 | 2    | 0.99 | 0    |
| Bmp1    | 0.62 | 1.02 | 1.57 | 0.67 | 1.8  |
| Bmp10   | 2.66 | 2.04 | 1.2  | 0.06 | 0    |
| Bmp15   | 0.6  | 1.1  | 0.78 | 2.08 | 1.92 |
| Bmp2    | 0.72 | 1.52 | 1.2  | 0    | 0    |
| Bmp2k   | 0.8  | 1.2  | 1.23 | 0    | 1.64 |
| Bmp3    | 0.74 | NA   | NA   | 0    | NA   |
| Bmp4    | 0.31 | 0.6  | 2.04 | 0    | 0.17 |
| Bmp5    | 0    | 0.37 | 0.81 | 2.32 | 2.45 |
| Bmp6    | 0    | 1.02 | 0.15 | 0.85 | 3.57 |
| Bmp7    | 0.6  | 1    | 0    | 2.8  | 1.97 |
| Bmp8a   | 0.76 | 0.6  | 1.16 | 1.12 | 0    |
| Bmp8b   | 4.11 | 0.91 | 0.92 | 4.77 | 1.23 |
| Bmper   | 2.89 | NA   | 0    | 1.73 | 0.77 |

|        |      |      |      |      |      |
|--------|------|------|------|------|------|
| Bmpr1a | NA   | 1    | 0.41 | 1.03 | 1.77 |
| Bmpr1b | 0.44 | 0.28 | 0.71 | 0    | 1.13 |
| Bmpr2  | 0    | 0.13 | 0.5  | 0.57 | 0.82 |
| Bms1   | NA   | 0    | 0.08 | 1.33 | 2.45 |
| Bms11  | 0    | NA   | NA   | NA   | NA   |
| Bmx    | 0.74 | 0    | 0.77 | 0.86 | 0    |
| Bnc1   | 0.55 | 1.46 | 2.92 | 0    | 2.37 |
| Bnc2   | 1.63 | 1.85 | 0.5  | 2.59 | 0.88 |
| Bnip1  | 0.38 | 1.57 | 0.37 | 0    | 0    |
| Bnip2  | 0.01 | 0.22 | 0.8  | 0.89 | 0    |
| Bnip3  | 0    | 1.61 | 3.45 | 2.37 | 0    |
| Bnip3l | 0.47 | 0.96 | 2.13 | 2.01 | 0    |
| Bnipl  | 0.21 | NA   | 0.6  | 0    | 0    |
| Boc    | 0.37 | NA   | 0.46 | 1.37 | 1.11 |
| Bod1   | NA   | NA   | 2.2  | 0.09 | 0    |
| Bod11  | NA   | NA   | NA   | NA   | 0.64 |
| Bok    | 1.35 | 2.42 | 0.86 | 2.43 | 0    |
| Bola1  | NA   | 0.42 | 1.17 | 2.25 | 0    |
| Bola2  | NA   | NA   | 1.52 | NA   | 0.25 |
| Bola3  | NA   | NA   | 2.08 | 0    | 0    |
| Boll   | 1.38 | NA   | 0.45 | 0.8  | 0.93 |
| Bop1   | 0.31 | 1.16 | 2.48 | 1.58 | NA   |
| Bora   | NA   | 0.12 | 1.78 | 1.9  | NA   |
| Bpgm   | 0.19 | 1.26 | 1.61 | 1.43 | 0    |
| Bphl   | 0    | 0    | 0.78 | NA   | 0    |
| Bpi    | NA   | NA   | NA   | 1.92 | NA   |
| Bpifa1 | NA   | 0.99 | 1.17 | 0.25 | NA   |
| Bpifa2 | NA   | NA   | 0.34 | 1.56 | NA   |
| Bpifa3 | NA   | NA   | 0    | 0.92 | NA   |
| Bpifb1 | NA   | NA   | 1.74 | 1.89 | NA   |
| Bpifb2 | NA   | NA   | 0    | 0.55 | NA   |
| Bpifb3 | NA   | NA   | NA   | 1.03 | NA   |
| Bpifb4 | NA   | NA   | NA   | 0.9  | NA   |
| Bpifb6 | NA   | NA   | NA   | 0.72 | NA   |
| Bpifc  | NA   | NA   | 1.23 | 1.32 | NA   |
| Bpil1  | 0    | NA   | NA   | NA   | 0    |
| Bpil2  | 0.19 | NA   | NA   | NA   | NA   |
| Bpil3  | 0    | NA   | NA   | NA   | NA   |
| Bpnt1  | 0    | 2.53 | 1.76 | 0.16 | 1.32 |
| Bptf   | NA   | 0    | 1.04 | 1.66 | 0    |
| Braf   | 0.77 | 0.22 | 1.13 | 2.15 | 0    |

|         |      |      |      |      |      |
|---------|------|------|------|------|------|
| Brap    | 0.84 | 2.56 | 0.31 | 0.69 | 0    |
| Brat1   | NA   | NA   | 0.26 | 0.79 | NA   |
| Brca1   | 0    | 0.57 | 2.23 | 0.5  | 0    |
| Brca2   | 0    | 2.41 | 2.16 | 0.27 | 0    |
| Brcc3   | NA   | 0.1  | 0    | 0.78 | 0    |
| Brd1    | 1.87 | 0    | 1.5  | 1.3  | 1.58 |
| Brd2    | 0.39 | 0    | 2.02 | 0.88 | 0.07 |
| Brd3    | 0.63 | 0    | 0.98 | 1.13 | 0    |
| Brd4    | 0.27 | 0    | 0.09 | 0.8  | 0    |
| Brd7    | 0.81 | 0.22 | 0.23 | 0.28 | NA   |
| Brd8    | 0.19 | 1.13 | 1.35 | 0.15 | 0    |
| Brd9    | NA   | 0    | 3.7  | 0.11 | 2.33 |
| Brdt    | 0.76 | 1.92 | 0    | 0.2  | 0    |
| Bre     | 0.01 | 1.28 | 2.02 | 5.33 | 0.49 |
| Brf1    | 1.39 | 1.78 | 1    | 0    | 0.56 |
| Brf2    | 0    | 1.54 | 1.99 | NA   | 3.64 |
| Bri3    | 0.63 | NA   | 0.86 | 0.09 | 0    |
| Bri3bp  | 0.51 | NA   | 1.53 | 7.67 | 0    |
| Bricd5  | NA   | NA   | NA   | 1.43 | NA   |
| Brip1   | 1.16 | 0    | 2.29 | 1.39 | 1.39 |
| Brix1   | NA   | 0.98 | 2.41 | 0    | NA   |
| Brk1    | NA   | NA   | 0.04 | 1.21 | NA   |
| Brms1   | 0    | 1.26 | 0.55 | 2.21 | 3.42 |
| Brms1l  | 1.2  | NA   | 0.51 | 0.44 | 0    |
| Brox    | NA   | NA   | 1.67 | 0.4  | NA   |
| Brp44   | NA   | NA   | NA   | NA   | 0    |
| Brp44l  | 0    | NA   | NA   | NA   | 3.02 |
| Brpf1   | 0.95 | 3.41 | 1.24 | 2.14 | 2.82 |
| Brpf3   | NA   | NA   | 1.17 | 1.21 | 1.14 |
| Brs3    | 1.36 | 1.16 | 1.64 | 2.77 | 0    |
| Brsk1   | NA   | NA   | 0    | 1.23 | NA   |
| Brsk2   | NA   | 1.22 | 0.53 | 1.57 | 0    |
| Brunol4 | 0    | NA   | NA   | NA   | NA   |
| Brunol6 | 0    | NA   | NA   | NA   | NA   |
| Brwd1   | NA   | 1.77 | 3.72 | 0.76 | 0    |
| Brwd3   | NA   | NA   | 0.47 | 2.52 | 0    |
| Bscl2   | 0.42 | 0.85 | 1.4  | 0    | 0.74 |
| Bsdc1   | NA   | 0.45 | 0.61 | 0.68 | 0    |
| Bsg     | 1.98 | 0.56 | 0.34 | 0    | 1.18 |
| Bsn     | 1.13 | 1.9  | 0.72 | 0.02 | 0    |
| Bsnd    | 1.07 | NA   | 0.84 | 0.97 | NA   |

|         |      |      |      |       |      |
|---------|------|------|------|-------|------|
| Bsph1   | NA   | NA   | NA   | 0.83  | NA   |
| Bspry   | 0.79 | 1.91 | 0.81 | 1.6   | 0    |
| Bst1    | 3.76 | 0    | 2.27 | 0.44  | 0    |
| Bst2    | 0    | 0.51 | 2.35 | 0.05  | 0    |
| Bsx     | NA   | NA   | NA   | 0     | NA   |
| Btaf1   | NA   | 2.01 | 0.7  | 0.85  | 0    |
| Btbd1   | 0.37 | 0.17 | 0.87 | 1.06  | 3.62 |
| Btbd10  | NA   | NA   | 3.2  | 0.66  | NA   |
| Btbd11  | 0.13 | NA   | 0.14 | 2.67  | 1.81 |
| Btbd12  | 1.32 | NA   | NA   | NA    | 1.63 |
| Btbd14a | 1.74 | NA   | NA   | NA    | NA   |
| Btbd14b | 0.27 | NA   | NA   | NA    | NA   |
| Btbd16  | NA   | NA   | NA   | 1.18  | NA   |
| Btbd17  | NA   | NA   | 1.95 | NA    | 0    |
| Btbd19  | NA   | NA   | 1.75 | NA    | NA   |
| Btbd2   | 0.11 | 0.17 | 1.21 | 0.52  | 2.06 |
| Btbd3   | 0.39 | 0.27 | 1.7  | 1.28  | 0.36 |
| Btbd6   | 0    | NA   | 1.56 | 0.28  | 0    |
| Btbd7   | 0.46 | 0.71 | 0.56 | 1.01  | 1.51 |
| Btbd9   | 1.04 | NA   | 1.93 | 0     | 0    |
| Btc     | 2.57 | 1.74 | 1.16 | 0     | 2.59 |
| Btd     | 0    | 0.84 | 3.71 | 0.73  | 0.62 |
| Btf3    | 0.21 | 1.63 | 0.98 | 0     | 0    |
| Btf3l4  | NA   | NA   | 1.61 | 0.93  | 0    |
| Btg1    | 0    | 1.99 | 2.5  | 0     | 2.07 |
| Btg2    | 0    | 1.76 | 0.99 | 1.9   | 0    |
| Btg3    | 0    | NA   | NA   | NA    | NA   |
| Btg4    | 0.29 | 1.96 | 4.62 | 1.75  | 4.38 |
| Btk     | 0.63 | 1.7  | 1.53 | 14.06 | 0    |
| Btla    | 0.75 | NA   | 0.82 | 0.66  | 3.89 |
| Btn1a1  | 0    | 0.63 | 0.14 | 0     | 0    |
| Btn2a2  | NA   | NA   | NA   | 2.85  | NA   |
| Btnl2   | NA   | 1.6  | 1.59 | 0.71  | 0    |
| Btnl9   | NA   | NA   | 0.96 | 1.33  | 1.44 |
| Btrc    | 0    | 0.6  | 0.91 | 0     | 0.86 |
| Bub1    | 1.57 | 0    | 2.43 | 0.83  | 0    |
| Bub1b   | 0.57 | 0.3  | 2.1  | NA    | 0.74 |
| Bub3    | 0.6  | 1.08 | 0.61 | 0.9   | 0    |
| Bud13   | NA   | NA   | 2.52 | 5.39  | 3.24 |
| Bud31   | NA   | 0    | 2    | 0.29  | 0    |
| Bves    | 0    | NA   | 0.57 | 1     | 0    |

|           |      |      |      |      |      |
|-----------|------|------|------|------|------|
| Bxdc1     | 0    | NA   | NA   | NA   | NA   |
| Bysl      | 0    | 2.2  | 1.46 | 2.7  | 2.05 |
| Bzrap1    | 1.16 | 1.38 | 4.64 | 0    | 2.47 |
| Bzrp11    | 1.75 | NA   | NA   | NA   | NA   |
| Bzw1      | 0.27 | 1.11 | 3.92 | 0    | 0    |
| Bzw2      | 1.03 | 0    | 0    | 0.46 | 0    |
| C1d       | NA   | 0.41 | 1.1  | 2    | 0.66 |
| C1galt1   | 1.02 | 3.43 | 1.66 | 1.53 | 2.96 |
| C1galt1c1 | NA   | 0    | 0.65 | 3.35 | 1.75 |
| C1qa      | 0.69 | 3.23 | 1.81 | 0.6  | 0    |
| C1qb      | 0.7  | 1.19 | 2.51 | 1.37 | 1.57 |
| C1qbp     | 0.49 | 2.06 | 3.15 | 1.08 | 2.98 |
| C1qc      | NA   | NA   | 2.53 | 1.35 | 1.88 |
| C1qdc1    | 0    | NA   | NA   | NA   | NA   |
| C1ql1     | 0    | 0    | 1.56 | 2.1  | 2.31 |
| C1ql2     | NA   | NA   | NA   | 1.41 | NA   |
| C1ql3     | 0    | NA   | NA   | 0.3  | NA   |
| C1ql4     | NA   | NA   | NA   | 2.89 | NA   |
| C1qtnf1   | 0    | 1.03 | 0.51 | 1.51 | 5.3  |
| C1qtnf2   | 0.09 | NA   | 0    | 0.37 | 0    |
| C1qtnf3   | 1.02 | 0.56 | 1.76 | NA   | NA   |
| C1qtnf4   | NA   | NA   | 0    | 1.17 | 4.73 |
| C1qtnf5   | 0.29 | NA   | NA   | NA   | NA   |
| C1qtnf6   | 1.05 | NA   | 0    | 1    | 1.03 |
| C1qtnf7   | 1.39 | NA   | 0    | 1.53 | 0    |
| C1qtnf9   | NA   | NA   | 0.83 | 0.46 | NA   |
| C1r       | 0.47 | NA   | NA   | NA   | NA   |
| C1rl      | 0.27 | NA   | NA   | 1.36 | NA   |
| C1s       | 0.3  | 2.2  | 9.95 | 1.12 | NA   |
| C2        | 0.45 | 1.93 | 0.72 | 0    | 1.36 |
| C2cd2     | NA   | 0    | 0.85 | 2.4  | 0    |
| C2cd2l    | NA   | 0    | 0.54 | 3.6  | 0    |
| C2cd3     | NA   | 0    | 1.64 | 1    | 1.25 |
| C2cd4a    | NA   | NA   | NA   | 1    | NA   |
| C2cd4b    | NA   | NA   | 4.51 | 0.57 | NA   |
| C2cd4c    | NA   | NA   | 0.61 | 0.71 | NA   |
| C2cd5     | NA   | 0.64 | 2.67 | 1.45 | NA   |
| C3        | 0.23 | 0    | 0    | 1.18 | 0    |
| C3ar1     | 2.3  | 2.98 | 3.14 | 0    | 1.66 |
| C4b       | NA   | 1.88 | 3.58 | NA   | NA   |
| C5ar1     | NA   | 3.71 | 2.29 | 2.5  | 6.86 |



|          |      |      |      |      |      |
|----------|------|------|------|------|------|
| C5ar2    | NA   | NA   | NA   | 1.31 | NA   |
| C6       | 1.38 | 0.68 | 1.3  | 0.55 | 1.81 |
| C8a      | 1.76 | 2.61 | 0.58 | 5.94 | 3.1  |
| C8b      | 0.47 | 2.47 | 2.01 | 0.49 | 0    |
| C8g      | NA   | 0.56 | 2.6  | 2.68 | 5.15 |
| C9       | 0.49 | 2.44 | 2.56 | 1.97 | 2.73 |
| Caap1    | NA   | 1.93 | 2.58 | 0.49 | NA   |
| Cab39    | 0    | 1.3  | 1.7  | 2.52 | 0    |
| Cab39l   | 0.19 | 1.24 | 0.87 | 1.72 | 0    |
| Cabc1    | 0    | NA   | NA   | NA   | 0    |
| Cabin1   | 0.72 | 0    | 1.09 | 1.51 | 4.51 |
| Cables1  | 0.43 | NA   | 0.7  | 0    | 0.84 |
| Cables2  | 0.13 | NA   | 4.65 | 8.06 | 1.64 |
| Cabp1    | 0.93 | 1.81 | 0.69 | 0.82 | 4.47 |
| Cabp2    | 1.31 | 3.32 | 0.33 | 2.82 | 0    |
| Cabp4    | 0.89 | NA   | 1.83 | NA   | NA   |
| Cabp5    | 0.34 | 0    | 0    | 0    | 1.54 |
| Cabp7    | 0    | NA   | 0    | 0.67 | 0.38 |
| Cabs1    | NA   | NA   | 2.16 | 0.1  | NA   |
| Cabyr    | 0.18 | 0.94 | 0.67 | 0.2  | 0    |
| Cacfd1   | NA   | 0.79 | 1.02 | 0    | NA   |
| Cachd1   | NA   | NA   | 0    | 2.74 | 2.29 |
| Cacna1a  | 0.38 | 1.14 | 1.1  | 2.82 | 0    |
| Cacna1b  | 0    | 1.07 | 0.51 | 0.69 | 0    |
| Cacna1c  | 1.25 | 0    | 0.98 | 1.05 | 1.07 |
| Cacna1d  | 0.66 | 0.7  | 1.5  | NA   | 1.26 |
| Cacna1e  | 0.57 | 0    | 0.94 | 0.89 | 1.89 |
| Cacna1f  | 0.92 | 2.05 | 2.86 | 2.8  | 2.4  |
| Cacna1g  | 0    | 1.43 | 0.36 | 1.64 | 0    |
| Cacna1h  | 0.07 | 0.03 | 0.96 | 2.59 | 3.58 |
| Cacna1i  | NA   | NA   | NA   | 2.99 | NA   |
| Cacna1s  | 1.16 | 1.86 | 1.74 | 0    | 0    |
| Cacna2d1 | 0.53 | 1.5  | 0.64 | 1.42 | 1.94 |
| Cacna2d2 | 0.11 | 0    | 0.86 | 0    | 1.27 |
| Cacna2d3 | 0    | 0    | 7.74 | 0.45 | 0    |
| Cacna2d4 | NA   | NA   | 0    | 0    | 1.65 |
| Cacnb1   | 0.3  | 0.47 | 0.96 | 3.04 | 0    |
| Cacnb2   | 0.37 | 0.46 | 1.06 | 1.28 | 0    |
| Cacnb3   | 1.42 | 1.78 | 1.49 | 1.44 | 7.8  |
| Cacnb4   | 0    | 1.34 | 0.5  | 3.35 | 0    |
| Cacng1   | 8.54 | 1.2  | 2.03 | 0.73 | 0    |

|          |      |      |      |      |      |
|----------|------|------|------|------|------|
| Cacng2   | 1.57 | 1.77 | 0.02 | 1.4  | 0    |
| Cacng3   | 4.73 | 1.92 | 4.78 | 1.23 | 4.34 |
| Cacng4   | 0    | 0.81 | 1.05 | 1.02 | 4.45 |
| Cacng5   | 0.33 | 2.03 | 0.27 | 0.76 | 2.27 |
| Cacng6   | 1.33 | NA   | 1.3  | 4.17 | 1.23 |
| Cacng7   | 1.29 | NA   | 1.09 | 1.28 | 1.79 |
| Cacng8   | 1.46 | NA   | 0.36 | NA   | 0    |
| Cactin   | NA   | 1.17 | 1.31 | NA   | NA   |
| Cacul1   | NA   | NA   | 0.9  | 0.76 | NA   |
| Cacybp   | 0.3  | 1.93 | 2.05 | 1.08 | 0    |
| Cad      | 0    | 0    | 0.79 | 2.44 | 0    |
| Cadm1    | NA   | 0.47 | 1.38 | NA   | 0.51 |
| Cadm2    | NA   | NA   | 0.58 | 2.41 | NA   |
| Cadm3    | NA   | 0.68 | 0.98 | 5.77 | 1.7  |
| Cadm4    | NA   | 1.58 | 2.21 | 1.31 | 2.56 |
| Cadps    | 0.13 | 2.24 | 1.2  | 1.16 | 2.04 |
| Cadps2   | 0    | 0.6  | 4.98 | 0.6  | 1.86 |
| Cage1    | NA   | NA   | 0.98 | 0    | NA   |
| Calb1    | 0.78 | 0.43 | 0.28 | 0    | 0    |
| Calb2    | 1    | 1.29 | 0    | 1.52 | 6.03 |
| Calca    | 0    | 0.33 | 1.48 | 0.5  | 0    |
| Calcb    | 8.89 | 1.85 | 0.64 | 0.62 | 1.08 |
| Calcoco1 | NA   | 0.01 | 0.05 | 0.11 | 0.76 |
| Calcoco2 | NA   | 4.66 | 2.06 | 0.65 | 4.42 |
| Calcr    | 2.99 | 0.7  | 0.96 | 1.33 | 8.44 |
| Calcr1   | 4.36 | 0.91 | 0    | 8.54 | 1.22 |
| Cald1    | 0.63 | 0.53 | 0.78 | 0.58 | 0.98 |
| Calhm1   | NA   | NA   | NA   | 3.34 | NA   |
| Calhm2   | NA   | 0.87 | 0.87 | 2.28 | 0    |
| Calm1    | 0.92 | 2.03 | 1.22 | 3.03 | 1.66 |
| Calm2    | 0    | 1.34 | 2.3  | 2.5  | NA   |
| Calm3    | 0.02 | 0.22 | 0.88 | 0    | 0.52 |
| Calml3   | 0    | 0    | 0.11 | 1.08 | 7.78 |
| Calml4   | 0    | 2.91 | 1.8  | 1.02 | 0    |
| Caln1    | 0.09 | NA   | 0.58 | 0.27 | 6.6  |
| Calr     | 0    | 1.44 | 0.76 | 2.52 | 0.87 |
| Calr3    | 1.28 | NA   | 0.68 | 4.16 | NA   |
| Calu     | 0    | 0.8  | 1.93 | 0.42 | 1.05 |
| Caly     | NA   | 1.54 | 2.92 | 1.13 | 1.42 |
| Camk1    | 0    | 0    | 3.2  | 0.42 | 0    |
| Camk1d   | 0    | 0    | 2.17 | 0    | 0    |

|           |      |      |      |      |      |
|-----------|------|------|------|------|------|
| Camk1g    | 1.04 | 0.11 | 5.88 | 4.68 | 2.83 |
| Camk2a    | 1    | 0.38 | 0.45 | 2.53 | 1.23 |
| Camk2b    | 2.19 | 0.77 | 1.46 | 1.04 | 2.22 |
| Camk2d    | 0.02 | NA   | 1.13 | 3.52 | 0    |
| Camk2g    | 0    | 1.49 | 0.41 | 3.08 | NA   |
| Camk2n1   | NA   | 0    | 2.08 | 0.82 | 2.99 |
| Camk2n2   | NA   | NA   | 3.47 | 0.96 | 0.81 |
| Camk4     | 0.17 | 0    | 0.86 | 0    | 1.89 |
| Camkk1    | 0    | NA   | 2.32 | 1.56 | 0.93 |
| Camkk2    | 0.39 | 0.61 | 2.82 | 2.1  | 2.8  |
| Camkmt    | NA   | 0    | 0.71 | 0.31 | NA   |
| Camkv     | NA   | 1.58 | 0.15 | 1.18 | 2.74 |
| Camp      | 2.14 | 0.48 | 1.73 | 0.24 | 0    |
| Camsap1   | 0.38 | 0    | 1.87 | NA   | 1.1  |
| Camsap111 | NA   | NA   | NA   | NA   | 1.32 |
| Camsap2   | NA   | 0.47 | 0.95 | 0.43 | NA   |
| Camsap3   | NA   | NA   | 0.81 | 1.23 | NA   |
| Camta1    | 1.8  | 0    | 0.01 | 0.11 | 2.78 |
| Camta2    | 0    | 2.46 | 3.79 | 1.12 | 2.17 |
| Cand1     | NA   | 0.65 | 0.25 | 0.22 | 0    |
| Cand2     | NA   | 0    | 1.9  | 1.75 | 3.27 |
| Cant1     | 0.62 | 1.28 | 0.61 | 0.74 | 2.5  |
| Canx      | 0.16 | 1.48 | 2.27 | 0.23 | 0    |
| Cap1      | 0    | 0    | 2.49 | 0.35 | 0    |
| Cap2      | 4.13 | 0.65 | 0.53 | 3.92 | 0.14 |
| Capg      | 0.94 | 0    | 2.77 | 1.21 | 0    |
| Capn1     | 0.4  | 1.7  | 0.95 | 0    | 0.53 |
| Capn10    | 1.25 | 1.27 | 1.71 | 2.43 | 1.21 |
| Capn11    | NA   | 1.46 | 1.83 | 0.15 | 0    |
| Capn12    | 1.9  | NA   | 1.94 | 2.41 | 1.92 |
| Capn13    | NA   | NA   | 2.52 | 3.14 | 0    |
| Capn2     | 0.41 | 0.98 | 1.32 | 0    | 0.28 |
| Capn3     | 0.57 | 1.8  | 0.3  | NA   | 0    |
| Capn5     | 0.04 | 0    | 1.28 | 1.08 | 1.83 |
| Capn6     | 0.72 | 0.48 | 0.71 | 1.6  | 1.38 |
| Capn7     | 0.32 | 0.02 | 3.29 | 0    | 0    |
| Capn8     | NA   | NA   | 0.64 | NA   | 0    |
| Capn9     | 0.59 | 0.11 | 1.29 | 0    | NA   |
| Capns1    | 0.03 | 0    | 1.68 | 0    | 2.64 |
| Capns2    | 0.65 | NA   | 2.1  | 1.06 | 0.24 |
| Caprin1   | NA   | 0    | 1.11 | 0.06 | 1.59 |

|          |      |      |      |      |      |
|----------|------|------|------|------|------|
| Caprin2  | NA   | 0    | 0.07 | 0.07 | 3.34 |
| Caps2    | 0    | NA   | 2.66 | 2.25 | 0.04 |
| Capsl    | NA   | NA   | 1.04 | 0.79 | 0.57 |
| Capza1   | 1.63 | 0    | 1.19 | 1.01 | 0    |
| Capza2   | 0.26 | 0    | 6.32 | 1.01 | 0    |
| Capza3   | 1.88 | NA   | 1.06 | 2.21 | 3.07 |
| Capzb    | 0.2  | 1.22 | 0.56 | 0.09 | 0.1  |
| Card10   | 0    | 0.82 | 0.54 | 0    | 7.29 |
| Card11   | 0.94 | NA   | 1.86 | 0.61 | 1.91 |
| Card14   | 0.34 | 2.88 | 0.63 | 0    | 3.32 |
| Card6    | 0.31 | NA   | 8.43 | 0.58 | 0    |
| Carf     | NA   | 0.61 | 1.74 | 1.52 | NA   |
| Carhsp1  | 0.65 | 1.56 | 1.02 | 1.97 | 0.54 |
| Carkd    | NA   | 0.92 | 1.2  | 0.71 | 0    |
| Carkl    | 6.14 | NA   | NA   | NA   | NA   |
| Carm1    | 0.53 | 0.14 | 0.91 | NA   | 0.32 |
| Carns1   | NA   | NA   | 0.82 | 7.23 | NA   |
| Cars     | 0.44 | 2.38 | 0.01 | 0.92 | 4.05 |
| Cars2    | NA   | 2.71 | 0.29 | 2.47 | 0    |
| Cart1    | 0.32 | NA   | NA   | NA   | NA   |
| Cartpt   | NA   | 0.97 | 1.14 | 2.39 | 1.88 |
| Casc1    | 0.3  | NA   | NA   | 0.29 | NA   |
| Casc3    | 0.3  | 0.19 | 0.35 | 4.4  | 0.03 |
| Casc4    | NA   | NA   | 0.07 | 0    | 0    |
| Casc5    | NA   | 0.76 | 0.42 | 0    | 0.63 |
| Casd1    | NA   | 0.48 | 0.92 | 4.4  | 0    |
| Cask     | 0.59 | 1.34 | 1.66 | 2.44 | 1.27 |
| Caskin1  | 1.4  | NA   | 0    | NA   | 1.46 |
| Caskin2  | 1.35 | 0.73 | 3.03 | 1.1  | 1.42 |
| Casp1    | 0.48 | 0    | 3.23 | 0    | 0    |
| Casp12   | 0.8  | NA   | NA   | 3.28 | NA   |
| Casp14   | 0    | NA   | 0.33 | 0.36 | 0    |
| Casp2    | 0    | 3.53 | 1.97 | 0    | 0    |
| Casp3    | 0.21 | 1.44 | 0.45 | 0.81 | 0    |
| Casp4    | 0.35 | 0.15 | 2.1  | 1    | 0    |
| Casp6    | 0    | 1.15 | 1.4  | 1.63 | 0    |
| Casp7    | 0.51 | 0.45 | 2.06 | 0.42 | 0.62 |
| Casp8    | 0.29 | 1.47 | 1.58 | 0.55 | 1.6  |
| Casp8ap2 | 0.5  | 2.33 | 0.93 | 1.11 | 3.47 |
| Casp9    | 0    | 1    | 1.28 | 0    | 2.34 |
| Casq1    | 0.66 | 0.6  | 1.53 | 3.59 | 5.1  |

|          |      |      |      |      |      |
|----------|------|------|------|------|------|
| Casq2    | 2.99 | 1.15 | 0.92 | 0.81 | 3.36 |
| Casr     | NA   | 0.64 | 0.21 | 1.2  | 0    |
| Cass4    | NA   | 2.91 | 0.57 | 1.11 | 1.8  |
| Cast     | 0.42 | 1.5  | 2.14 | 1.35 | 0.9  |
| Casz1    | NA   | 1.13 | 0.18 | 0.78 | 0    |
| Cat      | 0    | 0.79 | 2.83 | 2.44 | 0    |
| Catsper1 | 0.09 | NA   | 1.29 | 0.93 | NA   |
| Catsper2 | 0    | NA   | 0.17 | 0.96 | NA   |
| Catsper3 | 7.39 | NA   | 0.66 | 0.7  | 0.65 |
| Catsper4 | 0.21 | NA   | NA   | 0.88 | NA   |
| Catsperb | NA   | NA   | NA   | 0.4  | NA   |
| Catsperd | NA   | NA   | 0.87 | 2.02 | NA   |
| Cav1     | 1.87 | 1.03 | 1.5  | 0.92 | 0.97 |
| Cav2     | 0.45 | 0.17 | 1.02 | 1.11 | 0.88 |
| Cav3     | 2.67 | 0.99 | 1.2  | 3.04 | 0    |
| Cbara1   | 1.41 | NA   | NA   | NA   | 1.86 |
| Cbfa2t2  | NA   | 0    | 0.68 | 0    | 0.31 |
| Cbfa2t3  | NA   | 0.01 | 0.65 | 1.52 | 0    |
| Cbfb     | 0.1  | 0.97 | 1.33 | 0.52 | 0    |
| Cbl      | 0.57 | 0.68 | 1.14 | 1.29 | 0.75 |
| Cblb     | 0.71 | 0    | 2.48 | 5.57 | 1.49 |
| Cblc     | 1.08 | 1.02 | 0.63 | 5.3  | 0    |
| Cbll1    | 3.31 | 0    | 0.92 | 4.78 | 1.47 |
| Cbln1    | 0    | 1.33 | 0    | 1.77 | 2.03 |
| Cbln2    | 0    | NA   | 1.33 | 1.1  | 1.55 |
| Cbln3    | 0.93 | NA   | 0.95 | 1.05 | 0    |
| Cbln4    | 0.67 | NA   | 1.41 | 0.67 | 0.84 |
| Cbr1     | 0.64 | 2.61 | 4.86 | 0.45 | 0    |
| Cbr3     | 0.81 | 3.31 | 0    | 2.99 | 0    |
| Cbr4     | NA   | 0    | 0.91 | 0.99 | 3.42 |
| Cbs      | 0    | 2.19 | 0.18 | 0.61 | 1.66 |
| Cbwd1    | NA   | NA   | 0.62 | NA   | 7.22 |
| Cbx1     | 0    | 0    | 0.66 | 0.86 | 0    |
| Cbx2     | 0    | 2.31 | 1.58 | 1.52 | 1.39 |
| Cbx3     | 0.42 | 1.66 | 0.41 | 0.06 | 0    |
| Cbx4     | 0    | 0.2  | 1.46 | 1.75 | 1.44 |
| Cbx5     | 0.9  | 0.39 | 1.02 | 0    | 0    |
| Cbx6     | NA   | 0.35 | 3.46 | NA   | 0.17 |
| Cbx7     | 0    | 0    | 0.77 | 1.86 | 2.17 |
| Cbx8     | 0.1  | 2.27 | 1.4  | 2.22 | 0.83 |
| Cby1     | NA   | 0    | 3.42 | 0.13 | 2.95 |

|          |      |      |      |      |      |
|----------|------|------|------|------|------|
| Cby3     | NA   | NA   | 0    | NA   | 0    |
| Cc2d1a   | NA   | 1.09 | 2.12 | 0.8  | 0.53 |
| Cc2d1b   | NA   | NA   | 1.91 | 2.04 | 0    |
| Cc2d2a   | NA   | NA   | 0.66 | 2.36 | 0    |
| Cc2d2b   | NA   | 1.72 | 1.48 | 0.91 | 1.6  |
| Ccar1    | 0.21 | NA   | 1.37 | 0.39 | 0    |
| Ccbe1    | NA   | NA   | 0.33 | 4.2  | 0    |
| Ccbl1    | 0    | 0    | 0.66 | 3.44 | 0.57 |
| Ccbl2    | NA   | 1.42 | 0.54 | NA   | 0.18 |
| Ccbp2    | 4.66 | 1.01 | 1.08 | 0.22 | 1.23 |
| Ccdc101  | NA   | 1.3  | 1.08 | 1.61 | NA   |
| Ccdc102a | NA   | NA   | 1.03 | 0.02 | 0.91 |
| Ccdc103  | NA   | NA   | 0    | NA   | 3.56 |
| Ccdc104  | NA   | NA   | 0.21 | 0.84 | 8.84 |
| Ccdc105  | NA   | NA   | 0    | 0.89 | NA   |
| Ccdc106  | NA   | 0.98 | 1.06 | 3.13 | 2.48 |
| Ccdc107  | NA   | NA   | 2.53 | 0.22 | 0    |
| Ccdc108  | NA   | NA   | 1.78 | 0.38 | 0    |
| Ccdc109a | NA   | NA   | NA   | NA   | 1.73 |
| Ccdc109b | NA   | 2.55 | 3.3  | 2.35 | 0    |
| Ccdc11   | NA   | NA   | 2.47 | 0.09 | NA   |
| Ccdc110  | NA   | NA   | 1.62 | 4.46 | 1.75 |
| Ccdc111  | NA   | NA   | 2.16 | 0.72 | 4.31 |
| Ccdc112  | NA   | NA   | 2.48 | 0.99 | 0    |
| Ccdc113  | NA   | NA   | 2.09 | 0    | 0    |
| Ccdc114  | NA   | NA   | 2.84 | 2.53 | 0    |
| Ccdc115  | NA   | NA   | 0.52 | 2.28 | 0    |
| Ccdc116  | NA   | NA   | 2.94 | 3.33 | NA   |
| Ccdc117  | NA   | NA   | 1.62 | 0.06 | 0    |
| Ccdc12   | NA   | NA   | 1.76 | 1.87 | 4.27 |
| Ccdc120  | NA   | NA   | 3.85 | 3.81 | 0.64 |
| Ccdc121  | NA   | NA   | NA   | 1.53 | NA   |
| Ccdc122  | NA   | NA   | 2.25 | 1.07 | NA   |
| Ccdc123  | NA   | NA   | NA   | NA   | 2.46 |
| Ccdc124  | NA   | NA   | 0    | 0    | 0    |
| Ccdc125  | NA   | NA   | 0    | 0.85 | 3.43 |
| Ccdc126  | NA   | NA   | 3.44 | 1.91 | 2.36 |
| Ccdc127  | NA   | NA   | 1.27 | 0.57 | 0    |
| Ccdc129  | NA   | NA   | NA   | 0.47 | NA   |
| Ccdc13   | NA   | NA   | 2.11 | 1.13 | NA   |
| Ccdc130  | NA   | 0.1  | 1.59 | 0.43 | 3.03 |

|         |    |      |      |      |      |
|---------|----|------|------|------|------|
| Ccdc132 | NA | 2.32 | 0.74 | 0.44 | 0    |
| Ccdc134 | NA | 1.5  | 0.42 | 1.39 | 2.02 |
| Ccdc135 | NA | NA   | NA   | 0.99 | NA   |
| Ccdc136 | NA | NA   | 1.1  | 0    | 0    |
| Ccdc137 | NA | NA   | 0.18 | 1.23 | 0    |
| Ccdc138 | NA | NA   | 0.97 | 0.62 | 1.03 |
| Ccdc14  | NA | NA   | 1.13 | 0.48 | 0    |
| Ccdc141 | NA | NA   | 0.46 | 0.75 | NA   |
| Ccdc142 | NA | NA   | 1.55 | 2.14 | NA   |
| Ccdc146 | NA | NA   | 0.1  | 4.42 | 0    |
| Ccdc147 | NA | NA   | NA   | 4.84 | NA   |
| Ccdc148 | NA | NA   | NA   | 0.93 | NA   |
| Ccdc149 | NA | NA   | NA   | 0.73 | NA   |
| Ccdc15  | NA | NA   | NA   | 0.66 | NA   |
| Ccdc150 | NA | NA   | 0.45 | 8.98 | 4.18 |
| Ccdc151 | NA | NA   | 0.95 | 0.78 | 1.71 |
| Ccdc153 | NA | NA   | 2.11 | 0    | 1.53 |
| Ccdc154 | NA | NA   | NA   | 0    | NA   |
| Ccdc155 | NA | NA   | NA   | 2.21 | NA   |
| Ccdc157 | NA | NA   | 0    | 3.09 | 1.97 |
| Ccdc158 | NA | NA   | 1.17 | 5.12 | 1.16 |
| Ccdc159 | NA | NA   | 1.91 | 2.74 | NA   |
| Ccdc160 | NA | NA   | 6.73 | NA   | NA   |
| Ccdc166 | NA | NA   | NA   | 1.53 | NA   |
| Ccdc167 | NA | NA   | 0.67 | 0.42 | NA   |
| Ccdc169 | NA | NA   | 1.31 | 0    | NA   |
| Ccdc17  | NA | NA   | 0.88 | NA   | 0    |
| Ccdc170 | NA | NA   | NA   | 0.57 | NA   |
| Ccdc171 | NA | NA   | 2.52 | 0.55 | NA   |
| Ccdc172 | NA | NA   | 1.61 | 1.42 | NA   |
| Ccdc173 | NA | NA   | 0.11 | 0.64 | NA   |
| Ccdc174 | NA | NA   | 2.45 | NA   | NA   |
| Ccdc175 | NA | NA   | NA   | 0    | NA   |
| Ccdc176 | NA | 2.71 | 0.83 | 0.45 | NA   |
| Ccdc177 | NA | 1.7  | 0.59 | 1.43 | NA   |
| Ccdc178 | NA | NA   | NA   | 2.81 | NA   |
| Ccdc18  | NA | NA   | 1.09 | 0.34 | 0.76 |
| Ccdc181 | NA | 2.44 | 1    | 0    | NA   |
| Ccdc19  | NA | 0.51 | 1.87 | 0    | 2.21 |
| Ccdc21  | NA | NA   | NA   | NA   | 0    |
| Ccdc22  | NA | 0.3  | 1.64 | NA   | 1.46 |

|         |      |      |      |       |       |
|---------|------|------|------|-------|-------|
| Ccdc23  | NA   | NA   | 2.74 | 1.03  | 0.31  |
| Ccdc24  | NA   | NA   | 1.64 | 0.63  | 0.35  |
| Ccdc25  | NA   | 0    | 1.34 | 0.16  | 3.46  |
| Ccdc27  | NA   | NA   | NA   | 2.23  | NA    |
| Ccdc28a | NA   | 1.16 | 1.08 | 0     | 1.02  |
| Ccdc28b | NA   | 0.65 | 0    | 0.54  | 0.7   |
| Ccdc3   | 0.59 | NA   | 1.78 | 3.1   | 2.49  |
| Ccdc30  | NA   | 1.69 | 0.51 | 13.89 | 0     |
| Ccdc33  | NA   | 1.59 | 0.94 | 1.66  | 0.27  |
| Ccdc34  | NA   | NA   | 0.82 | 1.05  | 2.19  |
| Ccdc36  | NA   | NA   | NA   | 0     | NA    |
| Ccdc37  | NA   | NA   | NA   | 0.89  | NA    |
| Ccdc38  | NA   | NA   | 1.66 | 2.05  | NA    |
| Ccdc39  | NA   | NA   | 1.5  | NA    | 0.83  |
| Ccdc40  | NA   | 1.47 | 2.33 | 0     | 0     |
| Ccdc41  | NA   | 0.68 | 1.64 | 1.02  | 2.41  |
| Ccdc42  | NA   | NA   | NA   | 2.98  | NA    |
| Ccdc43  | NA   | NA   | 0    | 1.36  | 0     |
| Ccdc45  | NA   | NA   | NA   | NA    | 2.71  |
| Ccdc46  | NA   | NA   | NA   | NA    | 0     |
| Ccdc47  | NA   | 0.22 | 0.43 | 0.83  | 0     |
| Ccdc48  | NA   | NA   | NA   | NA    | 0     |
| Ccdc5   | 1.84 | NA   | NA   | NA    | NA    |
| Ccdc50  | NA   | NA   | 0.7  | 0.31  | 0     |
| Ccdc51  | NA   | 1.91 | 0.27 | 0.79  | 2.1   |
| Ccdc52  | NA   | NA   | NA   | NA    | 0     |
| Ccdc53  | NA   | 1.46 | 0.83 | 1.86  | 1.24  |
| Ccdc54  | NA   | NA   | 0    | 0.05  | 3.89  |
| Ccdc55  | NA   | NA   | NA   | NA    | 5.08  |
| Ccdc56  | NA   | NA   | NA   | NA    | 0.09  |
| Ccdc57  | NA   | 1.61 | 3.14 | 1.1   | 36.21 |
| Ccdc58  | NA   | NA   | 1.79 | 1.69  | 1.01  |
| Ccdc59  | NA   | 0.9  | 2.55 | NA    | 1.44  |
| Ccdc6   | NA   | 0.58 | 1.51 | 1.9   | 2.64  |
| Ccdc60  | NA   | NA   | NA   | 1.49  | NA    |
| Ccdc61  | NA   | NA   | 3.59 | 2.15  | 0     |
| Ccdc62  | NA   | NA   | 1.58 | 0     | 2.2   |
| Ccdc63  | NA   | NA   | 0    | 0.48  | NA    |
| Ccdc64  | NA   | 1.05 | 0.95 | 0.74  | 1.96  |
| Ccdc64b | NA   | NA   | 0    | 0.53  | 0     |
| Ccdc65  | NA   | NA   | 0.84 | 1.05  | NA    |



|         |    |      |      |      |       |
|---------|----|------|------|------|-------|
| Ccdc66  | NA | NA   | 0.32 | 1.58 | 0     |
| Ccdc67  | NA | NA   | 2.34 | 2.57 | NA    |
| Ccdc68  | NA | 0.85 | 0.24 | 0.86 | 0     |
| Ccdc69  | NA | 1.25 | 0.54 | 0.6  | 0     |
| Ccdc7   | NA | NA   | 1.26 | 0    | NA    |
| Ccdc70  | NA | 1.68 | 0.71 | 9.95 | 0     |
| Ccdc71  | NA | 2.65 | 2.26 | 1.5  | 0     |
| Ccdc711 | NA | NA   | 0.53 | 1.79 | NA    |
| Ccdc72  | NA | NA   | NA   | NA   | 1.59  |
| Ccdc73  | NA | NA   | NA   | 0    | NA    |
| Ccdc75  | NA | NA   | NA   | NA   | 0     |
| Ccdc76  | NA | NA   | NA   | NA   | 2.14  |
| Ccdc77  | NA | NA   | 1.13 | 0.97 | 1.09  |
| Ccdc78  | NA | NA   | NA   | 1.84 | NA    |
| Ccdc79  | NA | NA   | 0.69 | 0.94 | NA    |
| Ccdc8   | NA | NA   | NA   | 2.84 | NA    |
| Ccdc80  | NA | NA   | 0.79 | 0.84 | 0     |
| Ccdc81  | NA | 1.74 | 0.68 | 0    | 0     |
| Ccdc82  | NA | 1.26 | 0.04 | 0.07 | 1     |
| Ccdc83  | NA | NA   | 0.56 | 0.57 | 1.45  |
| Ccdc84  | NA | NA   | 0.98 | 0    | 2.94  |
| Ccdc85a | NA | NA   | 1.29 | 0.92 | 0     |
| Ccdc85b | NA | 1.67 | 2.45 | 2.26 | 0.83  |
| Ccdc85c | NA | NA   | NA   | 0.38 | NA    |
| Ccdc86  | NA | 2.22 | 6.15 | 1.15 | 1.23  |
| Ccdc87  | NA | 1.63 | 1.56 | 0.75 | 11.55 |
| Ccdc88a | NA | 0.14 | 4.7  | 1.46 | 0.29  |
| Ccdc88b | NA | NA   | 3.6  | 1.41 | 0.57  |
| Ccdc88c | NA | 2.42 | 1.07 | 0.61 | 2.31  |
| Ccdc89  | NA | NA   | 2.22 | 3.48 | NA    |
| Ccdc9   | 0  | 1.51 | 1.38 | 7.07 | 0     |
| Ccdc90a | NA | NA   | NA   | NA   | 3.2   |
| Ccdc90b | NA | 3.24 | 1.57 | 1.3  | 0     |
| Ccdc91  | NA | 0.53 | 0.32 | 0.58 | 0     |
| Ccdc92  | NA | 0    | 1.53 | 2.19 | 2.71  |
| Ccdc93  | NA | 1.24 | 1.54 | 0.73 | 2.11  |
| Ccdc94  | NA | 0    | 1.45 | 0    | 1.55  |
| Ccdc96  | NA | NA   | 0.44 | 1.54 | 1.27  |
| Ccdc97  | NA | NA   | 1.33 | 1.92 | 0     |
| Ccdc99  | NA | NA   | NA   | NA   | 7.72  |
| Ccer1   | NA | NA   | 0.79 | 0    | NA    |

|          |      |      |      |      |      |
|----------|------|------|------|------|------|
| Ccher1   | NA   | 0.09 | 0.84 | 0.39 | 3.43 |
| Ccin     | NA   | 2.46 | 1.39 | 0.98 | 2.98 |
| Cck      | 0    | 0.96 | 2.41 | 2.43 | 2.31 |
| Cckar    | 2.36 | 0.38 | 0.27 | 0.33 | 0    |
| Cckbr    | 3.17 | 0.61 | 0.33 | 1.21 | 2.94 |
| Ccl1     | 1    | 2.05 | 1.4  | 1.2  | 6.55 |
| Ccl11    | 0.61 | 1.3  | 2.74 | 0.37 | 0    |
| Ccl17    | 0.65 | 1.07 | 4.57 | 1.56 | 2.56 |
| Ccl19    | 0    | 1.2  | 0.87 | NA   | 4.98 |
| Ccl2     | 0.77 | 2.75 | 1.08 | 4.67 | 4.92 |
| Ccl20    | 0    | 0    | 5.43 | 2.13 | 3.91 |
| Ccl22    | 0    | 0.52 | 0.41 | 0    | 2.8  |
| Ccl24    | 1.44 | 2.02 | 0.87 | 1.26 | 6.07 |
| Ccl25    | 0    | 0.73 | 0.02 | 0.82 | 0    |
| Ccl26    | NA   | NA   | NA   | 0.96 | NA   |
| Ccl27    | 3.21 | NA   | NA   | NA   | NA   |
| Ccl28    | 0    | NA   | 0.87 | 4.39 | 0.16 |
| Ccl3     | 0.23 | NA   | NA   | 1.46 | NA   |
| Ccl4     | 0.09 | 2.03 | 2.14 | 1.33 | 0    |
| Ccl5     | 0    | 0.63 | 4.37 | 0.29 | 0    |
| Ccl7     | 0.69 | 1.27 | 0    | 3.04 | 0    |
| Ccl8     | 1.15 | 1.07 | 3.37 | 1.47 | 0    |
| Ccm2     | 0.67 | NA   | 2.74 | 0.5  | 0    |
| Ccm2l    | NA   | NA   | 0.73 | 1.98 | NA   |
| Ccna1    | 0    | 0    | 0.76 | 3.08 | 4.42 |
| Ccna2    | 0.23 | 1.42 | 3.32 | 0.57 | 1.62 |
| Ccnb1    | 0.24 | 0.76 | 1.67 | 0.44 | 0.75 |
| Ccnb1ip1 | NA   | 0    | 1.17 | 0.58 | 0    |
| Ccnb2    | 0.58 | 1.67 | 2.45 | 0.87 | 0.77 |
| Ccnb3    | 0    | NA   | 0    | 3.46 | 2.51 |
| Ccnc     | 0.41 | 0.46 | 0.51 | 0    | 1.49 |
| Ccnd1    | 0.58 | 2.02 | 1.58 | 1.57 | 1.7  |
| Ccnd2    | 0.81 | 1.53 | 3.21 | 2.11 | 1.26 |
| Ccnd3    | 0    | 1.08 | 0.08 | 0.19 | 0    |
| Ccndbp1  | 0.86 | NA   | 2.24 | 1.08 | 1.61 |
| Ccne1    | 0    | 0.93 | 1.08 | 1.01 | 3.11 |
| Ccne2    | 0.03 | 0    | 1.81 | NA   | 3.72 |
| Ccnf     | 0    | 0.09 | 2.96 | 0.22 | 0    |
| Ccng1    | 0    | 1.63 | 1.54 | 0.48 | 0    |
| Ccng2    | 0.13 | 0.65 | 1.54 | 0.23 | 1.8  |
| Ccnh     | 0    | 0    | 1.16 | 0.93 | 0    |

|        |      |      |      |      |      |
|--------|------|------|------|------|------|
| Ccni   | 0.9  | 0    | 1    | 0.17 | 0.67 |
| Ccnj   | 0    | 2.05 | 2.73 | 1.48 | 1.15 |
| Ccnjl  | NA   | 0    | 1.06 | 2.45 | 0    |
| Ccnk   | 2.88 | 1.49 | 3.08 | NA   | NA   |
| Ccnl1  | 0.21 | 2.11 | 1.96 | 0.43 | 0    |
| Ccnl2  | 0.86 | 0.88 | 1.09 | 0.72 | 2.36 |
| Ccno   | NA   | 0.4  | 1.39 | 3.91 | 0    |
| Cent1  | 1.07 | 1.34 | 1.64 | 0.41 | 0.73 |
| Cent2  | 0.13 | 1.35 | 1.08 | 0.13 | 0.15 |
| Ccny   | NA   | NA   | 1.05 | 2.11 | 0    |
| Ccnyl1 | NA   | NA   | 4.3  | 1.13 | 2.79 |
| Cep110 | NA   | 2.2  | 2.46 | 0.5  | NA   |
| Cepgl  | NA   | 0.5  | 1.95 | 0.43 | 2.39 |
| Ccr1   | 0    | 0.94 | 1.3  | 0.34 | 0    |
| Ccr10  | NA   | 0.21 | 1.2  | 1.26 | 3.1  |
| Ccr2   | 0.45 | 0.6  | 2.57 | 1.46 | 1.12 |
| Ccr3   | 1.53 | 0    | 0    | 0    | 3.51 |
| Ccr4   | 19.9 | 0.94 | 1.49 | 2.52 | 2.42 |
| Ccr5   | NA   | 2.63 | 3.41 | 0.94 | 0    |
| Ccr6   | 0.92 | 0    | 4.53 | 0.93 | 1.81 |
| Ccr7   | 0    | 0    | 0.07 | 2.45 | 1.8  |
| Ccr8   | 0.93 | 1.57 | 1.47 | 0.81 | 0    |
| Ccr9   | 0.73 | 0    | 0    | 1.64 | 0.97 |
| Ccrk   | 1.7  | NA   | NA   | NA   | NA   |
| Ccr11  | 0    | 1.45 | 3.05 | 1.46 | 0    |
| Ccr12  | 9.76 | 0.27 | 0.17 | 1.78 | 0    |
| Ccrn4l | 0.04 | 2.13 | 1.31 | 0    | NA   |
| Ccs    | 0.16 | 0.33 | 2.56 | 1.81 | 0    |
| Ccsap  | NA   | NA   | 2.72 | 1.08 | NA   |
| Ccser1 | NA   | NA   | 0.82 | 0.47 | NA   |
| Ccser2 | NA   | 0    | 1.24 | 5.05 | NA   |
| Cct2   | 0    | 1.01 | 0.5  | 0.39 | 0    |
| Cct3   | 0.67 | 0.77 | 0.21 | 0.88 | 1.36 |
| Cct4   | 0.07 | 1.03 | 1.3  | 0.58 | 0    |
| Cct5   | 0    | 1.98 | 2.22 | 1.56 | 0    |
| Cct6a  | 0    | 1.99 | 1.16 | 1.19 | 2.97 |
| Cct6b  | 0    | 0    | 1.73 | 1.89 | 3.73 |
| Cct7   | 0    | 0.42 | 0.41 | 0.36 | 0    |
| Cct8   | 0.33 | 0.52 | 0.48 | 0    | 0.77 |
| Ccz1   | NA   | 2.22 | 0.83 | NA   | NA   |
| Cd101  | NA   | NA   | NA   | 0    | NA   |

|         |      |      |      |      |       |
|---------|------|------|------|------|-------|
| Cd109   | 0.61 | NA   | 2.39 | 0.19 | 0.83  |
| Cd14    | 0.66 | 1.4  | 0.86 | 3.08 | 0     |
| Cd151   | 0    | 1.72 | 1.74 | 0.62 | 0.67  |
| Cd160   | 1.49 | 0    | 0.9  | 1.17 | 0     |
| Cd163   | 0.66 | 0    | 6.28 | 0    | 2.68  |
| Cd16311 | NA   | NA   | 0.51 | 1.21 | 1.08  |
| Cd164   | 1.38 | 1.37 | 1.63 | 0.36 | 0.58  |
| Cd16412 | NA   | NA   | NA   | 0.81 | NA    |
| Cd177   | NA   | 0.03 | 3.44 | 0.33 | 0     |
| Cd180   | NA   | 1.11 | 1.63 | 0    | 0     |
| Cd19    | 0.47 | 0.1  | 0.08 | 1.85 | 0     |
| Cd2     | 0.42 | 0    | 1.93 | 5.58 | 0     |
| Cd200   | 0    | 0    | 0.53 | 1.45 | 2.41  |
| Cd200r1 | 0    | NA   | 0.65 | NA   | NA    |
| Cd200r2 | 0.91 | NA   | NA   | NA   | NA    |
| Cd207   | 0.05 | 1.87 | 0    | 2.75 | 4.61  |
| Cd22    | 6.73 | 0.05 | 1.13 | 2.03 | 1.36  |
| Cd226   | 1.49 | 0.74 | 2.18 | 0.18 | 0     |
| Cd244   | 1.42 | 1.82 | 2.4  | NA   | 0.12  |
| Cd247   | NA   | 0    | 0    | 7.74 | 2.78  |
| Cd248   | NA   | 1.79 | 2.12 | 0    | 2.53  |
| Cd27    | NA   | 0    | 0.11 | 1.21 | 0     |
| Cd274   | NA   | NA   | 4.2  | 0    | 0.17  |
| Cd276   | NA   | NA   | 0.72 | 0.85 | 0     |
| Cd28    | 0.14 | 0    | 1.47 | 0.66 | 0     |
| Cd2ap   | 0    | 1.3  | 0.88 | 1.24 | 0.57  |
| Cd2bp2  | 0.34 | 0.31 | 0.07 | 0.89 | 0     |
| Cd300a  | NA   | 0.38 | 1.34 | 1.35 | 0     |
| Cd300c  | NA   | NA   | NA   | 0.5  | NA    |
| Cd300e  | NA   | NA   | NA   | 0.91 | NA    |
| Cd300lb | NA   | NA   | 1.95 | 0.58 | NA    |
| Cd300ld | NA   | NA   | NA   | 3.85 | NA    |
| Cd300lf | NA   | NA   | 1.79 | 2.28 | NA    |
| Cd300lg | NA   | NA   | 0.95 | 1.82 | NA    |
| Cd302   | NA   | 2.54 | 2.65 | NA   | 3.63  |
| Cd320   | NA   | 0    | 5.71 | 0.52 | 0.91  |
| Cd33    | 1.67 | 1.86 | 1.13 | 0.4  | 16.05 |
| Cd34    | 0.18 | 1.73 | 1.53 | 1.87 | 1.2   |
| Cd36    | 0.18 | 2.57 | 5.65 | 1.83 | 0.28  |
| Cd37    | 0.06 | 0    | 0.95 | 0    | 0     |
| Cd38    | 0    | 1.54 | 1.76 | 3.16 | 0.22  |

|        |      |      |      |      |      |
|--------|------|------|------|------|------|
| Cd3d   | 0    | 0    | 3.32 | 0    | 2.45 |
| Cd3e   | 1.4  | 0    | 0    | 3.19 | 0    |
| Cd3eap | NA   | 4.04 | 2    | 1.78 | 2.09 |
| Cd3g   | 1.1  | 0    | 2.26 | 0.57 | 0    |
| Cd4    | 0    | 0    | 1.28 | 3.15 | 0    |
| Cd40   | NA   | 1.1  | 0.45 | 0.32 | 0    |
| Cd40lg | NA   | 0    | 1.91 | 2.13 | 5.11 |
| Cd44   | 0    | 0.01 | 2.09 | 1.45 | 0    |
| Cd46   | NA   | 1.77 | 1.96 | 0.13 | 3.93 |
| Cd47   | 0    | 0.92 | 2.89 | 1.14 | 1.63 |
| Cd48   | 0.22 | 2.95 | 1.55 | 1.2  | 2.17 |
| Cd5    | 0.85 | 0    | 2.19 | 0    | 0.02 |
| Cd52   | 0.83 | 2.77 | 0.49 | 0.21 | 4.51 |
| Cd53   | 0.18 | 0    | 0.76 | 9.99 | 0    |
| Cd55   | NA   | 3.13 | 0.02 | 1.63 | 3.89 |
| Cd51   | 2.13 | 3.32 | 3.36 | 4.13 | 2.34 |
| Cd6    | 0    | 0    | 0.44 | 0    | 3.35 |
| Cd63   | 0.41 | NA   | NA   | 9.2  | NA   |
| Cd68   | 0.97 | 3.81 | 1.71 | 0.02 | 0.31 |
| Cd69   | 0    | 0.81 | 1.06 | 3.1  | 0.02 |
| Cd7    | 0.81 | 0    | 0.16 | 1.75 | 0    |
| Cd70   | NA   | 0    | 0.07 | 0.76 | 0    |
| Cd72   | 0.98 | 0.07 | 0.31 | 3.47 | 0    |
| Cd74   | NA   | 0    | 1.26 | 2.01 | 0    |
| Cd79a  | 0.33 | 0    | 1.69 | 2.21 | NA   |
| Cd79b  | 2.29 | 0.05 | 4.66 | 0.36 | 0    |
| Cd80   | 2.59 | 1.56 | 1.5  | 0.47 | 0    |
| Cd81   | 0.66 | 0    | 0.69 | 0    | 0    |
| Cd82   | NA   | 1.25 | 0.96 | 0.86 | 0    |
| Cd83   | 0.09 | 1.91 | 1.63 | 0.91 | 0    |
| Cd84   | 0.66 | 0.46 | 1.05 | 6.59 | 1.01 |
| Cd86   | 0.55 | 1.03 | 1.63 | 1.52 | 3.63 |
| Cd8a   | 3.37 | 0    | 0.22 | 0.21 | 2.01 |
| Cd8b   | 1.33 | NA   | NA   | NA   | NA   |
| Cd9    | 0.31 | 0.12 | 0.93 | 1.4  | 0.76 |
| Cd93   | NA   | 0.93 | 2.17 | 1.57 | 0    |
| Cd96   | 1.24 | 0    | 1.08 | 1.96 | 1.83 |
| Cd97   | 0.05 | 2.23 | 6.93 | 0.83 | 1.73 |
| Cd99   | NA   | 2.59 | 3.33 | 0.82 | 3.3  |
| Cd99l2 | NA   | NA   | 1.62 | 0.77 | 2.53 |
| Cda    | 0    | 0    | 0    | 0.12 | 0    |

|          |      |      |      |      |      |
|----------|------|------|------|------|------|
| Cdadc1   | 0.37 | 1.35 | 0.97 | 0.58 | 0    |
| Cdan1    | 0.89 | NA   | 0.52 | 2.6  | NA   |
| Cdc123   | NA   | 0.18 | 1.84 | 0    | 0.07 |
| Cdc14a   | 0.63 | 1.3  | 0.09 | 0    | 1.25 |
| Cdc14b   | 0.59 | 0    | 1.31 | 0.74 | 1.91 |
| Cdc16    | 0    | 0    | 0.43 | 1.53 | 4.21 |
| Cdc20    | 0    | 0.72 | 4.63 | 0    | 1.58 |
| Cdc20b   | NA   | NA   | 1.97 | NA   | 3.05 |
| Cdc23    | 0    | 0    | 0.83 | 0.94 | 1.14 |
| Cdc25a   | 0    | 0    | 1.52 | 1.28 | 0    |
| Cdc25b   | 1.13 | 0    | 3.38 | 0    | 0    |
| Cdc25c   | 0.34 | 1.28 | 2.5  | 4.26 | 0    |
| Cdc26    | 0.5  | NA   | 0.82 | 0.79 | 1.7  |
| Cdc27    | 0.36 | 0.67 | 0.83 | 0.81 | 0.52 |
| Cdc2l2   | 0.15 | NA   | NA   | NA   | NA   |
| Cdc2l5   | 0.49 | NA   | NA   | NA   | NA   |
| Cdc34    | 0    | 0.96 | 2.13 | 4.09 | NA   |
| Cdc37    | 0.47 | 0.57 | 0.71 | NA   | 0.3  |
| Cdc37l1  | NA   | 1.23 | 1.36 | 0.24 | 1.44 |
| Cdc40    | 0    | 0.55 | 0.39 | 0.34 | 3.2  |
| Cdc42    | 0.51 | 0.37 | 1.14 | 1.37 | 0    |
| Cdc42bpa | 1.17 | 1.28 | 0.22 | 1.57 | 0    |
| Cdc42bpb | 2.15 | 2.89 | 1.01 | 0    | 0    |
| Cdc42bpg | NA   | NA   | 2.74 | 0.53 | NA   |
| Cdc42ep1 | 0    | 1.26 | 2.95 | 1.82 | 0    |
| Cdc42ep2 | 0    | 3.43 | 3.06 | 3.28 | 0    |
| Cdc42ep3 | 0.97 | 0.52 | 0.28 | 0    | 9.08 |
| Cdc42ep4 | 0.52 | 0    | 1.24 | 0.69 | 0    |
| Cdc42ep5 | 1.45 | NA   | 0.43 | 1.44 | 0    |
| Cdc42se1 | NA   | 0.97 | 0.93 | 1.98 | 2.65 |
| Cdc42se2 | NA   | NA   | 2.55 | 0.96 | 3.35 |
| Cdc45    | NA   | 0    | 2.34 | 0.46 | NA   |
| Cdc45l   | 0    | NA   | NA   | NA   | NA   |
| Cdc5l    | 0.34 | 0.75 | 0.69 | 0.4  | 0    |
| Cdc6     | 0    | 0.26 | 3.26 | 2.9  | 1.82 |
| Cdc7     | 0    | 0.54 | 0.84 | 0.46 | 0.12 |
| Cdc73    | NA   | 0.63 | 0.81 | 0    | 0    |
| Cdca2    | 2.22 | NA   | 3.38 | 0.64 | 0    |
| Cdca3    | 0.37 | 0    | 2.22 | 0.46 | 2.74 |
| Cdca4    | 0.45 | 0.03 | 1.72 | 1.66 | 0    |
| Cdca5    | 0.41 | NA   | 1.84 | 0.5  | 0    |

|        |      |      |      |      |      |
|--------|------|------|------|------|------|
| Cdca7  | 0.55 | NA   | 2.3  | 1.67 | 0.98 |
| Cdca7l | NA   | NA   | 1.7  | 0    | 0    |
| Cdca8  | 0    | 0.9  | 5.4  | 0.75 | 0.03 |
| Cdcp1  | NA   | 2.28 | 2.13 | 0.38 | 2.11 |
| Cdcp2  | NA   | NA   | NA   | 3.21 | NA   |
| Cdgap  | 0    | NA   | NA   | NA   | NA   |
| Cdh1   | 0.59 | 0.81 | 2.57 | 1.84 | 1.57 |
| Cdh10  | NA   | 0.82 | 0.54 | 0    | 1.4  |
| Cdh11  | 1.65 | 0.51 | 2.05 | 0.31 | 1.68 |
| Cdh12  | NA   | NA   | NA   | 3.28 | NA   |
| Cdh13  | 1.21 | 1.33 | 0.29 | 2.27 | 0.92 |
| Cdh15  | 1.74 | 0.44 | 2.31 | 1.06 | 0    |
| Cdh16  | 1.55 | 2.28 | 0.98 | 1.85 | 4.68 |
| Cdh17  | 0    | 1.91 | 3.67 | 2.23 | 0    |
| Cdh18  | 0.78 | 2.02 | 0.5  | 2.37 | 1.7  |
| Cdh19  | NA   | NA   | NA   | 3.33 | NA   |
| Cdh2   | 0.53 | 0.49 | 2.07 | 0    | 1.61 |
| Cdh20  | 0.57 | 0    | 2.98 | 4.25 | 3.26 |
| Cdh22  | 1.54 | 2.19 | 1.64 | 2.18 | NA   |
| Cdh23  | 0.04 | NA   | 0    | 1.6  | 0    |
| Cdh24  | 0.71 | NA   | NA   | 0.53 | NA   |
| Cdh26  | NA   | NA   | 3.11 | 0.64 | 5.14 |
| Cdh3   | 0.41 | 0.65 | 0.14 | 0.44 | 2    |
| Cdh4   | 0    | 0.8  | 0.43 | 2.37 | 0    |
| Cdh5   | 0.86 | 0.72 | 0.63 | 0    | 1.2  |
| Cdh6   | 1.59 | 1.07 | 0.91 | 2.96 | 4.48 |
| Cdh7   | 0.21 | 1.77 | 0.98 | 1.12 | 2.97 |
| Cdh8   | 0.13 | 0.54 | 0.56 | 0.58 | 1.67 |
| Cdh9   | 2.84 | 1.6  | 0    | 1.39 | 0    |
| Cdhr1  | NA   | 1.2  | 0    | 0.96 | NA   |
| Cdhr2  | NA   | 1.66 | 2.36 | 2.09 | NA   |
| Cdhr3  | NA   | NA   | 0    | 2.08 | NA   |
| Cdhr5  | NA   | 1.49 | 1.21 | 3.6  | NA   |
| Cdip1  | NA   | 0    | 0.92 | 1.44 | NA   |
| Cdipt  | 0.61 | 0    | 2.36 | 1.24 | 0    |
| Cdk1   | NA   | 0.72 | 2.36 | 0.75 | NA   |
| Cdk10  | 0.15 | 0    | 0.54 | 1.43 | 3.25 |
| Cdk11b | NA   | NA   | NA   | 0.9  | NA   |
| Cdk12  | NA   | 0.43 | 0.74 | 3.67 | NA   |
| Cdk13  | NA   | 0.22 | 1.22 | 0    | NA   |
| Cdk14  | NA   | 0    | 0.06 | 6.88 | NA   |

|            |      |      |      |      |       |
|------------|------|------|------|------|-------|
| Cdk15      | NA   | NA   | NA   | 1.83 | NA    |
| Cdk16      | NA   | 0.99 | 1.81 | 0.67 | NA    |
| Cdk17      | NA   | 1.38 | 1.25 | 0.39 | NA    |
| Cdk18      | NA   | 1.67 | 1.16 | 0.99 | NA    |
| Cdk19      | NA   | 1.72 | 1.69 | 0.68 | NA    |
| Cdk2       | 1.28 | 0    | 1.71 | 0.72 | 0     |
| Cdk20      | NA   | 0.89 | 1.12 | 5.32 | NA    |
| Cdk2ap1    | 0.3  | 1.53 | 2.19 | 0    | 45.32 |
| Cdk2ap2    | NA   | 1.55 | 0.65 | 0    | 4.57  |
| Cdk3       | 0.37 | NA   | NA   | NA   | 0     |
| Cdk4       | 0.27 | 2.46 | 1.03 | 0.41 | 0     |
| Cdk5       | 0    | 2.04 | 0    | 1.32 | 2.39  |
| Cdk5r1     | 0.53 | 0.5  | 0.57 | 0    | 0.15  |
| Cdk5r2     | 0    | 2.5  | 0.16 | 1.23 | 0     |
| Cdk5rap1   | 0.65 | 0    | 2.85 | 0    | 8.09  |
| Cdk5rap2   | 0.71 | 2.16 | 0.39 | 0    | 0     |
| Cdk5rap3   | 0.7  | 0    | 1.35 | 0.35 | 3.95  |
| Cdk6       | 0.15 | 0.65 | 0.86 | 3.89 | 0.96  |
| Cdk7       | 0    | 1.49 | 1.73 | 1.55 | 0     |
| Cdk8       | 0.04 | 0.55 | 1.92 | 1.15 | 0     |
| Cdk9       | 1.12 | 1.25 | 0.78 | 1.78 | 0.22  |
| Cdkal1     | 0.87 | 0    | 1.16 | 0.25 | 0.05  |
| Cdkl1      | 1.11 | 2.44 | 0.31 | 2.64 | 2.46  |
| Cdkl2      | 0.59 | 0.97 | 0.34 | 1.77 | 0     |
| Cdkl3      | 1.06 | 0.85 | 0.51 | 0.48 | 0     |
| Cdkl4      | NA   | NA   | NA   | 0.53 | NA    |
| Cdkl5      | 0.48 | NA   | NA   | 0    | NA    |
| Cdkn1a     | 0.37 | 2.7  | 0.78 | 4.61 | 0     |
| Cdkn1b     | 1.04 | 0.07 | 2.55 | 1.61 | 0     |
| Cdkn1c     | 0.27 | 0.96 | 1.45 | 3.1  | 0     |
| Cdkn2a     | 0.44 | 1.91 | 3.16 | 2.21 | 3.04  |
| Cdkn2aip   | NA   | 0.31 | 1.97 | 0    | 0     |
| Cdkn2aipnl | NA   | NA   | 1.21 | 0.94 | 0     |
| Cdkn2b     | 0.51 | 0.78 | 1.52 | 1.41 | 0.74  |
| Cdkn2c     | 0.11 | 2.5  | 0.93 | 4.14 | 0     |
| Cdkn2d     | 0.1  | NA   | NA   | 1.46 | NA    |
| Cdkn3      | 0    | 0.11 | 3.34 | 2.81 | 2.2   |
| Cdnf       | NA   | NA   | NA   | 1.6  | NA    |
| Cdo1       | 2.35 | 1.64 | 1.09 | 0.24 | 4.08  |
| Cdon       | 0.67 | 0.08 | 0.46 | 0.96 | 1.74  |
| Cdpfl      | NA   | NA   | 0    | 2.13 | NA    |



|          |      |      |      |       |      |
|----------|------|------|------|-------|------|
| Cdr2     | 3.67 | 0    | 0.49 | 0.74  | 0    |
| Cdr21    | NA   | 1.65 | 0.59 | 1.17  | 1.83 |
| Cdrt4    | NA   | NA   | 1.33 | 1.21  | NA   |
| Cds1     | 1.21 | 1.85 | 1.96 | 3.38  | 0    |
| Cds2     | 2.06 | 2.23 | 2.62 | 21.32 | 1.15 |
| Cdsn     | NA   | 0.14 | 0.17 | 1.15  | 0    |
| Cdt1     | NA   | 1.78 | 1.52 | 1.35  | 0    |
| Cdv3     | 0.19 | 0.31 | 1.25 | 3.17  | 0    |
| Cdx1     | 0    | 0.43 | 2.06 | 0.65  | 0    |
| Cdx2     | 0.07 | 1.26 | 1.74 | 0.49  | 0    |
| Cdx4     | 2    | 2.42 | 2.7  | 1.82  | 0    |
| Cdyl     | 0.24 | 0.09 | 1.48 | 0     | 0    |
| Cdyl2    | 0.33 | NA   | 1.49 | 0.07  | NA   |
| Ceacam1  | 0.65 | 0    | 0.29 | 1.13  | 0    |
| Ceacam16 | NA   | NA   | NA   | 2.65  | NA   |
| Ceacam19 | NA   | NA   | NA   | 1.4   | NA   |
| Ceacam20 | NA   | NA   | NA   | 0.6   | NA   |
| Ceacam5  | NA   | NA   | NA   | 3.58  | NA   |
| Cebpa    | 0    | 1.55 | 0.23 | 1.2   | 0.22 |
| Cebpb    | 0.33 | 0.3  | 2.53 | 0     | 0    |
| Cebpd    | 0.17 | 0.38 | 0.96 | 5.39  | 0    |
| Cebpe    | 0.18 | NA   | NA   | 1.14  | NA   |
| Cebpg    | 0    | 0.98 | 2.22 | 0.81  | 1.84 |
| Cebpz    | 0.72 | 0.42 | 1.14 | 3.5   | 1.91 |
| Cecr2    | 0.83 | NA   | 0.13 | 4.24  | 1.11 |
| Cecr5    | 0.17 | 0    | 2.5  | 1.66  | 0    |
| Cecr6    | 0.15 | NA   | 0.14 | 1     | 0.94 |
| Ceecam1  | 0.37 | NA   | NA   | NA    | NA   |
| Cel      | 2.01 | 1.99 | 1.9  | 0.15  | 2.07 |
| Cela1    | NA   | NA   | 2.1  | 1.33  | 0.59 |
| Cela2a   | NA   | 0    | 1.13 | 0.56  | 3.08 |
| Cela3b   | NA   | 1.15 | 0.99 | 0.24  | 0    |
| Celf1    | NA   | 1.58 | 0.29 | 1.59  | NA   |
| Celf2    | NA   | 0.31 | 0.61 | 1.06  | NA   |
| Celf3    | NA   | 0    | 0.42 | 0     | NA   |
| Celf4    | NA   | NA   | 0.27 | 2.5   | NA   |
| Celf5    | NA   | NA   | 0.87 | 1.95  | NA   |
| Celf6    | NA   | NA   | 1.91 | 2.14  | NA   |
| Celsr1   | 0.07 | 0    | 2.15 | 0     | 0    |
| Celsr2   | 2.12 | 0    | 2    | 1     | 0.98 |
| Celsr3   | 0.44 | 2.48 | 0.74 | 1.41  | 0    |

|         |      |      |      |      |      |
|---------|------|------|------|------|------|
| Cend1   | NA   | 0.61 | 0.78 | 0.84 | 0    |
| Cenpa   | 0.31 | 0.87 | 5.59 | 1.67 | 1.53 |
| Cenpb   | 0    | 1.23 | 0.69 | 1.39 | 4.38 |
| Cenpc1  | 0.78 | 0    | 1    | 0.5  | 4.65 |
| Cenpe   | 0    | 0.09 | 2.98 | 0.58 | 1.23 |
| Cenpf   | 0.08 | 0.81 | 1.24 | 0    | 2.45 |
| Cenph   | 0.11 | NA   | 2.41 | 1.15 | 4.55 |
| Cenpi   | NA   | 0.31 | 3.87 | 1.39 | 2.87 |
| Cenpj   | 0    | 0.34 | 0.83 | 0    | 0    |
| Cenpk   | NA   | NA   | 0.35 | NA   | 0    |
| Cenpl   | NA   | NA   | 2.97 | 0    | 4.56 |
| Cenpm   | NA   | 1.01 | 2.79 | 5.87 | 1.29 |
| Cenpn   | NA   | 1.39 | 3.65 | NA   | 0.07 |
| Cenpo   | NA   | 1.63 | 0.94 | NA   | 0.65 |
| Cenpp   | NA   | NA   | NA   | 0.66 | NA   |
| Cenpq   | NA   | 2.18 | 2.04 | 0.72 | 0.09 |
| Cenpt   | NA   | 1.39 | 2.72 | 0.16 | 0    |
| Cenpv   | NA   | NA   | 1.6  | 0    | 0    |
| Cenpw   | NA   | NA   | 2.91 | 0    | NA   |
| Centa1  | 0.43 | NA   | NA   | NA   | NA   |
| Centa2  | 0    | NA   | NA   | NA   | NA   |
| Centb1  | 0.8  | NA   | NA   | NA   | NA   |
| Centb2  | 0.85 | NA   | NA   | NA   | NA   |
| Centb5  | 0.51 | NA   | NA   | NA   | NA   |
| Centd1  | 0.48 | NA   | NA   | NA   | NA   |
| Centd2  | 0.46 | NA   | NA   | NA   | NA   |
| Centg2  | 1.35 | NA   | NA   | NA   | NA   |
| Centg3  | 0.01 | NA   | NA   | NA   | NA   |
| Cep104  | NA   | 0    | 1.75 | 1.49 | NA   |
| Cep110  | NA   | NA   | NA   | NA   | 1.74 |
| Cep112  | NA   | 0.17 | 0.07 | 1.94 | NA   |
| Cep120  | NA   | NA   | 1.95 | 0.65 | 0    |
| Cep128  | NA   | NA   | 1.46 | 0    | NA   |
| Cep135  | NA   | 2.08 | 0.47 | 0.27 | 0    |
| Cep152  | NA   | 2.76 | 1.95 | 0.84 | 0.63 |
| Cep164  | NA   | 0.24 | 2.42 | 0.09 | 0.85 |
| Cep170  | NA   | 1.21 | 1.03 | 0.7  | 0    |
| Cep170b | NA   | 1.59 | 0    | 1.11 | NA   |
| Cep19   | NA   | NA   | 1.98 | 0.2  | NA   |
| Cep192  | NA   | 0    | 0.89 | 0    | 1.69 |
| Cep250  | NA   | 0    | 3.01 | 0    | 0    |

|         |      |      |      |      |      |
|---------|------|------|------|------|------|
| Cep290  | NA   | 0.67 | 1.21 | NA   | 0    |
| Cep350  | NA   | 0.5  | 0.66 | 0.26 | 0.58 |
| Cep41   | NA   | 1.12 | 0.45 | 0.61 | NA   |
| Cep44   | NA   | NA   | 0.74 | 0.63 | NA   |
| Cep55   | NA   | 0.58 | 1.96 | 0.84 | 1.53 |
| Cep57   | NA   | 0.12 | 2.18 | 0.91 | 3.35 |
| Cep5711 | NA   | NA   | 0.17 | 0.82 | NA   |
| Cep63   | NA   | 0.13 | 0.59 | 0.1  | 0    |
| Cep68   | NA   | 0    | 0.56 | 1.09 | 0.77 |
| Cep70   | NA   | 0.28 | 1.38 | 1.37 | 0    |
| Cep72   | NA   | 0    | 2.51 | 0.05 | 1.25 |
| Cep76   | NA   | 1.01 | 0.56 | 5.25 | 0    |
| Cep78   | NA   | NA   | 1.39 | 0.5  | 2.38 |
| Cep85   | NA   | 1.88 | 3.1  | 0    | NA   |
| Cep89   | NA   | NA   | 1.51 | 0.88 | NA   |
| Cep95   | NA   | NA   | 0.71 | 0.16 | NA   |
| Cep97   | NA   | 2.95 | 0.73 | 0.93 | 0.7  |
| Cept1   | 0.69 | 0    | 1.43 | 1.07 | 1.64 |
| Cer1    | 0.15 | 0.31 | 0.69 | 0    | 0    |
| Cercam  | NA   | NA   | 1.47 | 0.83 | 2.61 |
| Cerk    | 0.39 | 0.34 | 0.95 | 0    | NA   |
| Cerkl   | NA   | NA   | NA   | 0    | NA   |
| Cers1   | NA   | 1.77 | 1.87 | 0    | NA   |
| Cers2   | NA   | 3.15 | 2.76 | 1.45 | NA   |
| Cers3   | NA   | NA   | 0.8  | 0.62 | NA   |
| Cers4   | NA   | 2.03 | 1.05 | 0.64 | NA   |
| Cers5   | NA   | NA   | 1.98 | 1.28 | NA   |
| Cers6   | NA   | 1.76 | 1.31 | 1.01 | NA   |
| Ces1    | 0    | NA   | NA   | NA   | 0    |
| Ces2    | 3.12 | NA   | NA   | NA   | NA   |
| Ces3    | 2.11 | NA   | NA   | NA   | 1.59 |
| Ces4a   | NA   | NA   | 0.93 | 0.94 | NA   |
| Ces5a   | NA   | NA   | 1.13 | 1.24 | NA   |
| Ces8    | NA   | NA   | NA   | NA   | 2.28 |
| Cetn1   | 1.04 | 0    | 0.21 | 3.11 | 3.87 |
| Cetn2   | 0.16 | 2.42 | 4.6  | 0.98 | 0    |
| Cetn3   | 0.86 | 0.57 | 1.41 | 2.29 | 0    |
| Cfb     | NA   | 0.13 | 0.28 | 0.81 | 2.25 |
| Cfc1    | NA   | NA   | 0.14 | NA   | 2.44 |
| Cfd     | NA   | 1.08 | 1.38 | 2.49 | 7.09 |
| Cfdp1   | 0.25 | 1.33 | 2.26 | NA   | 3.4  |

|         |      |      |      |      |      |
|---------|------|------|------|------|------|
| Cfh     | 0    | 1.28 | 3.33 | 2.01 | NA   |
| Cfhr1   | NA   | 1.28 | 2.89 | 2.67 | NA   |
| Cfhr2   | NA   | 0.09 | 0.69 | 1.02 | NA   |
| Cfhr3   | NA   | NA   | 5.8  | NA   | NA   |
| Cfi     | 1.41 | 2.05 | 0.71 | 0.52 | NA   |
| Cfl1    | 0.78 | 1.42 | 0.28 | 0    | 0.08 |
| Cfl2    | 0.13 | NA   | 0.65 | 0.8  | 1.45 |
| Cflar   | 0    | 0.01 | 0.63 | 1.03 | 0    |
| Cfp     | NA   | 1.92 | 0.78 | 2.58 | 0    |
| Cftr    | 0.45 | 0    | 0.74 | 0.52 | 1.04 |
| Cga     | 1.13 | 0.46 | 1.96 | 1.66 | 3.47 |
| Cggbp1  | 1.54 | 0    | 0.94 | 0.99 | 0.83 |
| Cgn     | 0.3  | NA   | 3.9  | 2.96 | 1.61 |
| Cgnl1   | NA   | NA   | 0.36 | 3.94 | 0.08 |
| Cgref1  | 0    | 0    | 1.06 | 1.74 | 0    |
| Cgrrf1  | NA   | 1.35 | 0.29 | 0.44 | 0    |
| Ch25h   | 0.16 | 0.86 | 3.39 | 3.92 | 0    |
| Chac1   | NA   | 1.09 | 1.24 | 0.1  | 7.18 |
| Chac2   | NA   | NA   | 0.25 | 0.51 | 3.9  |
| Chad    | 1.09 | 2.22 | 1.7  | 0.16 | 0.09 |
| Chadl   | NA   | NA   | 1.13 | 1.13 | NA   |
| Chaf1a  | 0.19 | NA   | NA   | 1.2  | NA   |
| Chaf1b  | 0.36 | 1.61 | 0.75 | 0.85 | 0.75 |
| Champ1  | NA   | NA   | 0.52 | 5.14 | NA   |
| Chat    | 0.32 | 2.22 | 4.14 | 0.26 | 0    |
| Chchd1  | 0.13 | NA   | 0.35 | 0.56 | 0    |
| Chchd10 | NA   | NA   | 0.95 | 0    | 0    |
| Chchd2  | NA   | 0    | 2.96 | 0.13 | NA   |
| Chchd3  | 0    | 0.15 | 1.08 | 0.2  | 0    |
| Chchd4  | 0.03 | NA   | 0.72 | 1.12 | 0    |
| Chchd5  | 0.28 | NA   | 0.81 | 0    | 0.53 |
| Chchd6  | NA   | NA   | 1.62 | 0.15 | 0.99 |
| Chchd7  | 0.73 | 1.22 | 0.77 | 1.12 | 1.09 |
| Chchd8  | NA   | NA   | NA   | NA   | 0    |
| Chd1    | 0    | 0    | 1.02 | 0.49 | 0    |
| Chd11   | 0.43 | 0    | 2.28 | 0.66 | 0    |
| Chd2    | 1.53 | 1.44 | 1.03 | 1.94 | 1.39 |
| Chd3    | 0.52 | 0    | 2.71 | 1.24 | 0.77 |
| Chd4    | 0.46 | 1.7  | 1.6  | 3.63 | 0.04 |
| Chd5    | 0.08 | 0    | 1.37 | 0.03 | 0    |
| Chd6    | NA   | NA   | 1.43 | 0    | 1.41 |

|         |      |      |      |      |      |
|---------|------|------|------|------|------|
| Chd7    | 2.1  | 0.71 | 2.18 | NA   | 0    |
| Chd8    | 1    | 0    | 1.63 | 0.43 | 0    |
| Chd9    | 0    | 1.16 | 2.98 | 1.09 | 0    |
| Chdh    | 0.29 | NA   | 0.67 | 0.07 | 1.19 |
| Chek1   | 0    | 0.25 | 1.03 | 0.38 | 0    |
| Chek2   | 0.95 | 1.64 | 2.64 | 0.98 | 3.02 |
| Cherp   | 2.64 | 0    | 2.15 | NA   | 0    |
| Ches1   | 0.49 | NA   | NA   | NA   | NA   |
| Chfr    | 0.91 | 0.8  | 1.01 | 0    | 2.04 |
| Chga    | 0.69 | 2.88 | 9.1  | 0    | 7.05 |
| Chgb    | 2.29 | 2.08 | 0.29 | 1.17 | 0    |
| Chi3l1  | 7.93 | 2.43 | 3.44 | 0.83 | 0.77 |
| Chia    | NA   | 0.36 | 0.76 | 6.07 | 5.11 |
| Chic1   | 0    | NA   | 0.1  | 0    | 0    |
| Chic2   | 0.35 | 1.54 | 2.29 | 0    | 0    |
| Chid1   | NA   | NA   | 1.7  | 0.09 | 0.79 |
| Chit1   | 5.16 | 1.39 | 0    | 1.09 | 0    |
| Chka    | 0.35 | 0.65 | 0.19 | 1.98 | 1.54 |
| Chkb    | 1.37 | 0.24 | 4.98 | NA   | 1.23 |
| Chl1    | 0.65 | 0.61 | 0.88 | 2.12 | 0    |
| Chm     | 0.44 | 1.05 | 0.8  | 0    | 1.35 |
| Chml    | 0.25 | 0.78 | 0.75 | 0.53 | 2.69 |
| Chmp1a  | NA   | 3.36 | 1.14 | 1.28 | 0    |
| Chmp1b  | NA   | 0.71 | 1.02 | 0    | 4.66 |
| Chmp2a  | NA   | 0.45 | 2.71 | 2.72 | 0    |
| Chmp2b  | NA   | 0.31 | 0.07 | 0.51 | 0    |
| Chmp3   | NA   | 1.65 | 0.63 | 0.76 | NA   |
| Chmp4b  | NA   | NA   | 2.33 | 1.47 | NA   |
| Chmp4c  | NA   | NA   | 0.78 | 5.46 | 0    |
| Chmp5   | NA   | 1.29 | 1.27 | 1    | 1.24 |
| Chmp6   | NA   | 0.89 | 1.95 | 0    | 0.96 |
| Chmp7   | NA   | 0    | 0.35 | 0    | 6.14 |
| Chn1    | 0.21 | 0.12 | 0    | 0    | 0.27 |
| Chn2    | 0.42 | 0    | 1.4  | NA   | 0    |
| Chod1   | 0.22 | 1.91 | 3.57 | 1.08 | 0    |
| Chordc1 | 0.4  | 2.64 | 1.1  | 0.95 | 3.46 |
| Chp1    | NA   | 1.77 | 1.23 | 1.89 | NA   |
| Chp2    | NA   | 0.71 | 2.51 | 1.76 | NA   |
| Chpf    | NA   | 1.34 | 0.87 | 1.53 | 0    |
| Chpf2   | NA   | 1.03 | 0.18 | NA   | 1.04 |
| Chpt1   | 2.31 | 1.85 | 1.79 | 0.73 | 0.82 |

|         |      |      |      |       |      |
|---------|------|------|------|-------|------|
| Chrac1  | 6.64 | NA   | 2.34 | 1.24  | 0    |
| Chrd    | 9.53 | 2.5  | 1.02 | NA    | 0    |
| Chrdl1  | 0.36 | 0.02 | 0.66 | 0     | 1.64 |
| Chrdl2  | 1.33 | NA   | 1.25 | 1.71  | 0    |
| Chrm1   | 0.25 | NA   | 1.22 | 1.22  | 0    |
| Chrm2   | 3    | NA   | NA   | 4.24  | NA   |
| Chrm3   | 0.63 | 1.97 | 0.82 | 0.52  | 0    |
| Chrm4   | 0    | 0.92 | 1.59 | 1.35  | 0.12 |
| Chrm5   | 2.29 | NA   | NA   | 2.33  | NA   |
| Chrna1  | 0.52 | 1.42 | 0.42 | 1.29  | 0    |
| Chrna10 | NA   | NA   | NA   | 1.03  | NA   |
| Chrna2  | 0.05 | 1.81 | 1.14 | 1.56  | 1.69 |
| Chrna3  | 0.03 | 0.51 | 0.64 | 1.38  | 1.74 |
| Chrna4  | 0    | 0.79 | 0.32 | 2.31  | 3.31 |
| Chrna5  | 1.22 | 0.67 | 0.83 | 4.3   | 0    |
| Chrna6  | 1.12 | 1.26 | 0    | 1.13  | 0    |
| Chrna7  | 0.28 | NA   | NA   | 3.43  | NA   |
| Chrna9  | 0    | 0.96 | 0.62 | 2.64  | 1.81 |
| Chrb1   | 1.81 | 1.79 | 5.45 | NA    | 4.08 |
| Chrb2   | 0.76 | 1.65 | 0.24 | 1.37  | 0    |
| Chrb3   | 1    | 1.64 | 0.75 | 0     | 2.67 |
| Chrb4   | 1.18 | 0.16 | 0.04 | 0.8   | 1.3  |
| Chrnd   | 2.03 | 1.49 | 4.41 | 1.93  | 1.11 |
| Chrne   | 1.04 | 3.28 | 0.88 | NA    | 0    |
| Chrng   | 0    | 1.43 | 2.39 | 0.7   | 1.98 |
| Chst1   | 1.68 | 1.76 | 1.63 | 0.8   | 4.27 |
| Chst10  | 1.42 | 0.15 | 1.35 | 0     | 1.95 |
| Chst11  | 0.78 | 3.2  | 1.55 | 11.45 | 0    |
| Chst12  | 1.07 | 0    | 2.13 | 5.82  | 2.05 |
| Chst13  | NA   | NA   | 1    | 0.78  | 1.82 |
| Chst14  | NA   | NA   | 0.79 | 4.55  | 0    |
| Chst15  | NA   | 1.41 | 1.44 | 0     | 0    |
| Chst2   | 1.21 | 0.59 | 1.09 | 0.78  | 1.54 |
| Chst3   | 0.8  | 0.58 | 2.32 | 1.37  | 0    |
| Chst4   | 1.36 | 1.92 | 3.3  | 1.34  | 1.52 |
| Chst5   | 0.72 | 2.46 | 1.81 | 0.85  | 0    |
| Chst7   | 0.72 | 0    | 0.23 | 1.53  | 4.49 |
| Chst8   | 2.3  | 0    | 0.78 | 0.57  | 9.06 |
| Chst9   | 1.17 | NA   | 1.81 | 4.35  | 0    |
| Chsy1   | NA   | 0    | 1.47 | 3.24  | NA   |
| Chsy3   | NA   | NA   | 0.86 | 0.8   | 0    |

|         |      |      |      |      |      |
|---------|------|------|------|------|------|
| Chtf18  | 1.02 | NA   | 2.6  | 0.57 | 0    |
| Chtf8   | NA   | NA   | 0.28 | 1.33 | 0    |
| Chtop   | NA   | 0.84 | 1.88 | 1.26 | NA   |
| Chuk    | 0.57 | 2.64 | 1.25 | 1.5  | 0    |
| Churc1  | 0.46 | NA   | 0.01 | 1.78 | 0.81 |
| Chx10   | 1.87 | NA   | NA   | NA   | NA   |
| Ciao1   | NA   | 1.18 | 0.78 | 0    | 0    |
| Ciapin1 | 0.29 | 1.42 | 2.46 | 0.72 | 2.44 |
| Cib1    | 0.58 | 1.23 | 2.08 | NA   | 0    |
| Cib2    | 0.29 | 0.26 | 0    | NA   | 1.88 |
| Cib3    | 0.76 | NA   | 2.99 | 7.1  | NA   |
| Cib4    | NA   | NA   | 0.53 | 0.47 | 0    |
| Cic     | 1.18 | 0    | 1.45 | 0    | 0.49 |
| Cidea   | 0.17 | 1.7  | 0.06 | 0.89 | 8.12 |
| Cideb   | NA   | 1.97 | 0.42 | NA   | 0    |
| Cidec   | 2.88 | 1.47 | 1    | 3.34 | 6.09 |
| Ciita   | NA   | 1.81 | 0.03 | 0.26 | 0.49 |
| Cilp    | 0.77 | 1.02 | 0.58 | 1.87 | 0    |
| Cilp2   | 2.8  | NA   | 0.94 | 0.78 | NA   |
| Cinp    | NA   | 2.31 | 0.48 | 0.05 | 0.82 |
| Cir1    | NA   | 3.64 | 1.66 | 1.21 | 0    |
| Cirbp   | 0.3  | 0    | 2.22 | 0    | 4.26 |
| Cirh1a  | NA   | NA   | 1.43 | 1.16 | 3.12 |
| Cisd1   | NA   | 2.48 | 0.98 | 0.18 | 0    |
| Cisd2   | NA   | NA   | 1.54 | 0    | 2.96 |
| Cisd3   | NA   | NA   | 4.01 | NA   | 1.08 |
| Cish    | 0.58 | 3.25 | 0.24 | 2.71 | 0    |
| Cit     | 0.87 | 1.01 | 1.4  | 0    | 1.63 |
| Cited1  | 1.52 | 1.52 | 1.86 | 1.63 | 0    |
| Cited2  | 0.8  | 2    | 0.39 | 0    | 3.09 |
| Cited4  | 0.39 | NA   | 0.95 | 0.62 | 1.38 |
| Ciz1    | 0    | 0    | 1.02 | 1.11 | 0    |
| Ckap2   | 0.02 | 0.71 | 3.26 | 0.01 | 1.84 |
| Ckap2l  | NA   | NA   | 1.9  | 0    | 0    |
| Ckap4   | 0    | 0.15 | 2.72 | 0.96 | 0    |
| Ckap5   | NA   | 0    | 1.46 | 0    | 1.86 |
| Ckb     | 1.52 | 1.25 | 5.37 | 1.69 | 1.49 |
| Cklf    | NA   | 0    | 2.32 | NA   | 0.14 |
| Ckm     | 0    | 0.46 | 0    | 1.59 | 1.67 |
| Ckmt2   | 2.98 | 1.13 | 1.29 | 0.05 | 2.53 |
| Cks1b   | NA   | 0.22 | 2.14 | 0.75 | 0.56 |

|        |       |      |      |      |      |
|--------|-------|------|------|------|------|
| Cks2   | 0     | 0.03 | 4.17 | 0.57 | 5.05 |
| Clasp1 | 0.68  | 0.81 | 0.92 | 0    | 0.59 |
| Clasp2 | 0.84  | 0.03 | 1.02 | 0    | 0    |
| Clasrp | NA    | 1.99 | 2.86 | 6.72 | NA   |
| Clca1  | 1.46  | 1.29 | 0.3  | 1.38 | 0    |
| Clca2  | 30.48 | 0.92 | 0.07 | 0.64 | 0    |
| Clca3  | 0.91  | NA   | NA   | NA   | NA   |
| Clca4  | 0.61  | 3.18 | 0    | 0.83 | 1.1  |
| Clcc1  | NA    | 0.59 | 1.22 | 0.97 | 2.79 |
| Clef1  | NA    | 1.03 | 0.69 | 1.16 | 0    |
| Clcn1  | 4.28  | 0    | 0.66 | 0.16 | 1.24 |
| Clcn2  | 0     | 0.95 | 1.3  | 1.11 | 1.78 |
| Clcn3  | 0.15  | 2.28 | 2.69 | 0.14 | 0    |
| Clcn5  | 1.39  | 0    | 0.56 | 3.88 | 0.46 |
| Clcn6  | 0     | 0.03 | 0.8  | 0    | 1.88 |
| Clcn7  | 1.77  | 0.68 | 1.79 | 2.61 | 0.81 |
| Clcnka | 1.16  | NA   | NA   | 0.58 | NA   |
| Clcnkb | 0     | 0.6  | 1.53 | 0.99 | 6.23 |
| Cldn1  | 0     | 0    | 1.52 | 0.74 | 0    |
| Cldn10 | 0.23  | 1.31 | 0.81 | NA   | NA   |
| Cldn11 | 1.06  | 0.75 | 1.63 | 0.63 | 0    |
| Cldn12 | 5.63  | NA   | 2.84 | 2.8  | 1.1  |
| Cldn14 | 0     | 0.73 | 5.08 | 2.36 | 0    |
| Cldn15 | 0.78  | 1.76 | 0.62 | 2.2  | 0    |
| Cldn16 | 2.06  | 0.32 | 0.55 | 1.89 | 1.84 |
| Cldn17 | 1.94  | NA   | NA   | 1.52 | NA   |
| Cldn18 | 0     | 0.57 | 0.46 | 1.59 | 3.29 |
| Cldn19 | 0.18  | NA   | 0    | 1.16 | NA   |
| Cldn2  | 0.81  | NA   | 0.77 | NA   | 4.15 |
| Cldn20 | NA    | NA   | NA   | 0    | NA   |
| Cldn22 | 3.88  | NA   | NA   | NA   | NA   |
| Cldn23 | 0     | NA   | 1.39 | 1.75 | 1.75 |
| Cldn24 | NA    | NA   | NA   | 0    | NA   |
| Cldn3  | 1.5   | 1.85 | 0.82 | 1.98 | 0    |
| Cldn4  | 0.56  | 2.66 | 3.53 | 0.8  | 0.86 |
| Cldn5  | 0     | 1.72 | 2.24 | 1.03 | 3.54 |
| Cldn6  | 0     | 0    | 0.8  | 4.38 | 1.77 |
| Cldn7  | 0.85  | 0.89 | 0    | 0.71 | 2.61 |
| Cldn8  | 0.47  | 1.75 | 0    | 1.82 | 0    |
| Cldn9  | 0     | 0.66 | 1.68 | 1.96 | 5.05 |
| Cldnd1 | NA    | NA   | NA   | NA   | 0    |



|         |      |      |      |      |      |
|---------|------|------|------|------|------|
| Cldnd2  | NA   | NA   | 0.26 | 1.96 | 0    |
| Clec10a | NA   | 2.7  | 0.97 | 2.54 | 0.91 |
| Clec11a | NA   | 0.11 | 0.36 | 1.38 | 0    |
| Clec12a | NA   | NA   | NA   | 0    | NA   |
| Clec12b | NA   | NA   | 0.56 | 0.19 | 0    |
| Clec14a | NA   | NA   | 1.63 | 0.69 | 0    |
| Clec16a | NA   | 0    | 0.77 | 0    | 1.47 |
| Clec18a | NA   | NA   | 2.12 | NA   | 0    |
| Clec1a  | NA   | 0    | 1.25 | 0    | 0    |
| Clec1b  | NA   | 1.58 | 1.56 | 2.74 | 0    |
| Clec2d  | NA   | 2.76 | 4.86 | 0    | 0    |
| Clec2l  | NA   | NA   | 1.09 | NA   | 0    |
| Clec3a  | NA   | NA   | NA   | 0.19 | NA   |
| Clec3b  | NA   | 1.83 | 1.19 | 5.06 | 2.11 |
| Clec4d  | NA   | NA   | 1.17 | 3.43 | NA   |
| Clec4e  | NA   | 0.38 | 0.33 | 1.18 | 0    |
| Clec4f  | NA   | NA   | 1.64 | 1.09 | NA   |
| Clec4g  | NA   | NA   | 0    | 0.78 | NA   |
| Clec5a  | NA   | 0.21 | 0.7  | 1.61 | 0    |
| Clec7a  | NA   | 2.53 | 1.72 | 0.54 | 0    |
| Clec9a  | NA   | NA   | NA   | 2.95 | NA   |
| Clgn    | 3.38 | 2.32 | 0    | 0    | 0    |
| Clhc1   | NA   | NA   | 3.9  | 1.35 | NA   |
| Clic1   | 0.76 | 0    | 1.66 | 0.17 | 0    |
| Clic3   | 1.84 | 1.67 | 2.04 | 2.53 | 24.9 |
| Clic4   | 0    | 2.34 | 5.1  | 0.8  | 0    |
| Clic5   | 1.52 | 0.53 | 0.76 | 1.98 | 0.1  |
| Clic6   | 0.09 | NA   | 1.12 | 0.56 | 2.23 |
| Clint1  | NA   | 0.9  | 1.46 | 1.04 | 1.78 |
| Clip1   | NA   | 0.27 | 0.19 | 0    | 0.41 |
| Clip2   | NA   | 0    | 0    | 1.12 | 0    |
| Clip3   | NA   | 0.95 | 0.58 | 0.8  | 3.59 |
| Clip4   | NA   | 0.83 | 0.4  | 0    | 0    |
| Clk1    | 0    | NA   | NA   | 1.17 | NA   |
| Clk2    | 0.84 | 0    | 1.2  | 2.01 | 5.42 |
| Clk3    | 1.64 | 1.08 | 1.69 | NA   | 0    |
| Clk4    | 0.19 | 3.12 | 1.25 | 0    | 0.16 |
| Clmn    | 0.3  | 1.01 | 0.87 | 0.12 | 0    |
| Clmp    | NA   | NA   | 2.27 | 0.45 | NA   |
| Cln3    | 1.32 | 2.54 | 1.6  | 6.07 | 0    |
| Cln5    | 0.75 | 0.27 | 1.3  | 1.52 | 5.06 |

|         |      |      |      |      |      |
|---------|------|------|------|------|------|
| Cln6    | 0    | 0.49 | 2.69 | 0    | 3.26 |
| Cln8    | 0.32 | 1.13 | 2.73 | 2.18 | 0.15 |
| Clnk    | NA   | NA   | 2.29 | 1.41 | NA   |
| Clns1a  | 0.73 | 1.14 | 0.24 | 1.81 | 0    |
| Clock   | 0    | 0.14 | 0.02 | 0.51 | 1.45 |
| Clp1    | 0.54 | 0.17 | 0    | 0.69 | 0.11 |
| Clpb    | NA   | 1.43 | 1.76 | 0.11 | 1.94 |
| Clpp    | 0.09 | 0.43 | 1.58 | 0.15 | 4.57 |
| Clps    | 0.43 | 0.89 | 0.32 | 0.78 | 3.9  |
| Clpsl2  | NA   | NA   | NA   | 0.91 | NA   |
| Clptm1  | 0.55 | 1.19 | 1.25 | 0.75 | 1.43 |
| Clptm11 | NA   | NA   | 2.34 | 2.32 | 2.83 |
| Clpx    | 0.57 | 0.2  | 1.25 | 0    | 3.1  |
| Clrn1   | NA   | NA   | 0.95 | 0.43 | NA   |
| Clrn2   | NA   | NA   | NA   | 2.72 | NA   |
| Clrn3   | NA   | NA   | 1.16 | 2.39 | 3.01 |
| Clspn   | 3.96 | 0    | 0.74 | 0.21 | 1.19 |
| Clstn1  | 1.1  | 0    | 2.66 | 1.25 | 9.24 |
| Clstn2  | 2.41 | 0.57 | 0.95 | 0    | 1.73 |
| Clstn3  | 0    | 2.83 | 1.75 | 0.32 | 2.98 |
| Clta    | 0.18 | 0.63 | 0.92 | 5.22 | 1.63 |
| Cltb    | 0.02 | 0.61 | 0.32 | 0.66 | 0.41 |
| Cltc    | 0    | 0.1  | 1.67 | 0    | 0    |
| Clu     | 0.39 | 2.42 | 0    | 2.98 | NA   |
| Cluap1  | NA   | 1.03 | 2.44 | 0    | 0.6  |
| Cluh    | NA   | 2.22 | 1.08 | 3.17 | NA   |
| Clvs1   | NA   | NA   | 0    | 1.31 | NA   |
| Clvs2   | NA   | NA   | 1.38 | 0.41 | NA   |
| Clybl   | 0.59 | NA   | 2.02 | 2.17 | 0.56 |
| Cma1    | NA   | 2.15 | 0.03 | 0.76 | 2.63 |
| Cmah    | 0    | NA   | NA   | NA   | 0    |
| Cmas    | 0.22 | 2.13 | 2.56 | 0.59 | 0    |
| Cmb1    | NA   | NA   | 2.66 | 2.59 | 1.98 |
| Cmc1    | NA   | NA   | 0.26 | 0.61 | 0    |
| Cmc2    | NA   | 1.28 | 3.34 | 0.22 | NA   |
| Cmip    | NA   | NA   | 0.62 | 1.23 | NA   |
| Cmklr1  | 2.14 | 1.22 | 0.86 | 3.94 | 1.66 |
| Cmpk1   | NA   | 0.54 | 2.1  | 0.49 | 0    |
| Cmpk2   | NA   | NA   | 0.13 | 0.04 | 0    |
| Cmss1   | NA   | NA   | 1.2  | 1.4  | NA   |
| Cmtm1   | NA   | NA   | NA   | 0    | 0.06 |

|         |       |      |      |      |      |
|---------|-------|------|------|------|------|
| Cmtm3   | NA    | NA   | 2.85 | 1.48 | NA   |
| Cmtm4   | NA    | NA   | NA   | 0    | NA   |
| Cmtm5   | NA    | NA   | 0.88 | 1    | 1.5  |
| Cmtm6   | NA    | 0    | 3.5  | 1.03 | 0    |
| Cmtm7   | NA    | NA   | 2.76 | 0.74 | 0    |
| Cmtm8   | NA    | NA   | 2.23 | 0.94 | 0    |
| Cmya1   | 0.15  | NA   | NA   | NA   | NA   |
| Cmya3   | 1.25  | NA   | NA   | NA   | NA   |
| Cmya5   | 0.16  | NA   | 0.19 | NA   | 0    |
| Cnbd2   | NA    | NA   | 0.34 | 0.81 | NA   |
| Cnbp    | NA    | 0.13 | 3.7  | 1.59 | 0    |
| Cndp1   | 9.1   | NA   | 0    | 0.72 | 0    |
| Cndp2   | 0     | 1.9  | 0.9  | 0    | 0    |
| Cnep1r1 | NA    | NA   | 2.13 | 0.65 | NA   |
| Cnfn    | 13.72 | NA   | 0.65 | 0.47 | 0    |
| Cnga1   | 0     | 2.05 | 0.09 | NA   | 2.59 |
| Cnga2   | 2.18  | NA   | NA   | 0.78 | NA   |
| Cnga3   | 1.11  | NA   | NA   | 1.43 | NA   |
| Cnga4   | 0.37  | NA   | 2.01 | 3.48 | NA   |
| Cngb1   | NA    | 1.72 | 0.69 | 1.47 | NA   |
| Cngb3   | 0.69  | 1.67 | 0.24 | 5.66 | 0    |
| Cnih    | 0     | 1.93 | 2.09 | 0.05 | 0    |
| Cnih2   | NA    | NA   | 3.08 | 1.52 | NA   |
| Cnih3   | NA    | 2.66 | 0    | 2.81 | 0    |
| Cnih4   | NA    | 0    | 2.9  | 1.57 | 2.11 |
| Cnksr1  | 1.56  | 0.88 | 0.24 | 0.09 | 0    |
| Cnksr2  | 0     | 0.34 | 0.65 | 1.84 | 1.25 |
| Cnksr3  | NA    | NA   | 0.88 | 0.42 | 1.98 |
| Cnn1    | 0     | 3.01 | 2.23 | 1.77 | 0.23 |
| Cnn2    | 0     | 0.43 | 1.45 | 0.21 | 0    |
| Cnn3    | 1.35  | 1.19 | 1.76 | 0.55 | NA   |
| Cnnm1   | 0.24  | 1.26 | 1.06 | 1.56 | 2.25 |
| Cnnm2   | 0.45  | 0.47 | 0.95 | 0    | 1.29 |
| Cnnm3   | 0     | 0    | 0.94 | 1.33 | 0    |
| Cnnm4   | 3.94  | 1.82 | 1.76 | 7.18 | 0    |
| Cno     | 0.49  | NA   | NA   | NA   | 2.1  |
| Cnot1   | NA    | 0    | 0.11 | 0    | 0.53 |
| Cnot10  | 1.01  | NA   | 0    | 0.72 | 0    |
| Cnot11  | NA    | NA   | 1.35 | 7.63 | NA   |
| Cnot2   | 0     | 0.06 | 1.04 | 0.85 | 0.73 |
| Cnot3   | 0.14  | 0.67 | 2.47 | 1.87 | 0    |

|         |      |      |      |      |      |
|---------|------|------|------|------|------|
| Cnot4   | 0.17 | 0.32 | 0.79 | 0.61 | 0    |
| Cnot6   | NA   | 0.76 | 1.33 | 0    | 0    |
| Cnot6l  | 1.07 | NA   | 0.57 | 1.47 | 0    |
| Cnot7   | 0    | 0.63 | 0.79 | 0.84 | 3.2  |
| Cnot8   | 0.23 | 1.33 | 0.94 | 0.48 | 3.46 |
| Cnp     | NA   | 2.09 | 1.36 | 1.92 | 1.51 |
| Cnppd1  | NA   | 0.51 | 0.24 | 3.25 | NA   |
| Cnpy1   | NA   | NA   | 1.38 | 1.21 | NA   |
| Cnpy2   | NA   | 0.78 | 1.64 | 0.79 | 0.06 |
| Cnpy3   | NA   | 1.14 | 1.63 | 1.66 | 0    |
| Cnpy4   | NA   | 2.47 | 1.67 | 0.45 | 1.31 |
| Cnr1    | 0.23 | 0.91 | 0    | 0.88 | 2.11 |
| Cnr2    | 2.97 | 0.16 | 2.28 | 1.28 | 4.73 |
| Cnrip1  | NA   | NA   | 0.65 | 0.8  | 0.97 |
| Cnst    | NA   | NA   | 2.28 | 0.32 | NA   |
| Cntd1   | NA   | NA   | 0.22 | 0.45 | 0    |
| Cntf    | 0.31 | NA   | NA   | NA   | NA   |
| Cntfr   | 0.42 | 0    | 0    | 0.81 | 2.01 |
| Cntln   | NA   | 0    | 1.19 | 1.14 | 1.27 |
| Cntn1   | 0.36 | 0.19 | 0.66 | 0.97 | 2.07 |
| Cntn2   | 0.95 | 0.04 | 0    | 1.33 | 1.59 |
| Cntn3   | 1.25 | NA   | 1.27 | 0.01 | 3.02 |
| Cntn4   | 0.76 | NA   | 0.74 | 1.7  | 1.98 |
| Cntn5   | NA   | NA   | NA   | 5.42 | NA   |
| Cntn6   | 2.93 | 0.24 | 2.97 | 2.09 | 0.11 |
| Cntnap1 | 1.26 | 2.68 | 0    | 1.05 | 0.19 |
| Cntnap2 | 0.55 | 0.73 | 0.8  | 1.39 | 0.98 |
| Cntnap3 | NA   | NA   | NA   | 0.11 | NA   |
| Cntnap4 | 0.26 | NA   | 1.26 | 1.71 | 2.72 |
| Cntrob  | NA   | NA   | 2.92 | 0    | 0.1  |
| Coa3    | NA   | 2.02 | 1.1  | 2.67 | NA   |
| Coa4    | NA   | 1.52 | 0.83 | 1.21 | NA   |
| Coa5    | NA   | NA   | 0.51 | 0.12 | NA   |
| Coa6    | NA   | NA   | 2.58 | 1.34 | NA   |
| Coasy   | 0.56 | 2.97 | 0.68 | 3.39 | 0.96 |
| Cobl    | 0.51 | 1.35 | 0.67 | 1.71 | 1.92 |
| Cobl1   | 3.67 | 1.57 | 1.18 | 0.99 | 1.22 |
| Cobra1  | NA   | NA   | NA   | NA   | 0    |
| Coch    | 0.08 | 3.16 | 0.47 | 0    | 2.09 |
| Cog1    | NA   | NA   | 1.16 | NA   | 0    |
| Cog2    | 0.61 | 1.17 | 0.8  | 1.99 | 2.83 |

|          |       |      |      |      |      |
|----------|-------|------|------|------|------|
| Cog3     | 1.31  | NA   | 4.32 | 0.94 | 6.02 |
| Cog4     | 3.56  | 0.29 | 0.91 | 0    | 2.44 |
| Cog5     | 0.62  | 1.6  | 0.5  | 0.03 | 0    |
| Cog6     | 0.66  | NA   | 1    | 0.32 | 0    |
| Cog7     | 0.58  | 0.73 | 1.9  | 0    | 0    |
| Cog8     | 0.94  | 1.09 | 1.21 | 2.2  | NA   |
| Coil     | 0     | 0.78 | 0    | 1.31 | 0    |
| Col10a1  | 2.95  | 0.05 | 1.21 | 0.1  | 0    |
| Col11a1  | 0.22  | 1.52 | 0.62 | 1.64 | 0.01 |
| Col11a2  | 0.82  | 1.66 | 2.31 | 2.21 | 0    |
| Col12a1  | 0.82  | NA   | 0.59 | 1.87 | 2.33 |
| Col13a1  | 1.35  | 1.29 | 0    | 1.26 | 4.19 |
| Col14a1  | 0.77  | 0.66 | 0.76 | 3.65 | 2.98 |
| Col15a1  | 22.04 | 2.46 | 1.82 | 0    | 1.95 |
| Col16a1  | 1     | 0    | 0.21 | 0.84 | 1.13 |
| Col17a1  | 0.28  | 1.27 | 0    | 0.76 | 2.48 |
| Col18a1  | 0.5   | 1.82 | 0.91 | 0    | 1.18 |
| Col19a1  | 1.42  | 1.77 | 1.34 | 0    | 1.53 |
| Col1a1   | 1     | 0.48 | 0.84 | 1.79 | 0.01 |
| Col1a2   | 0.88  | 0.62 | 3.3  | 1.02 | 0.99 |
| Col20a1  | NA    | NA   | 1.03 | 1.88 | 1.58 |
| Col22a1  | NA    | NA   | 0.36 | 0.95 | 1.02 |
| Col23a1  | 1.24  | NA   | 0.69 | 1.85 | 0    |
| Col24a1  | 0.29  | NA   | 6.83 | 0.67 | 0    |
| Col25a1  | 0.65  | NA   | 0.52 | 1.16 | 1.24 |
| Col26a1  | NA    | NA   | 2.36 | 1.98 | NA   |
| Col27a1  | 0.19  | NA   | 0.57 | 0.27 | 0    |
| Col28a1  | NA    | NA   | NA   | 2.18 | NA   |
| Col2a1   | 0.09  | 0.85 | 3.94 | 2.84 | 0    |
| Col3a1   | 1.44  | 0.89 | 2.09 | 1.17 | 1.07 |
| Col4a1   | 2.96  | 0.51 | 0.8  | 0    | 1.67 |
| Col4a2   | 3.14  | 0.4  | 2.09 | 0    | 0    |
| Col4a3   | 2.35  | 0    | 0.42 | 0    | 3.07 |
| Col4a3bp | 0.22  | 0.02 | 0.4  | 0.34 | 1.51 |
| Col4a4   | 4.98  | 0.71 | 0.1  | 5.63 | 0.1  |
| Col4a5   | 0.57  | 0.01 | 0.09 | 5.72 | 1.02 |
| Col4a6   | 0.61  | 1.05 | 0.7  | 0.65 | 2.67 |
| Col5a1   | 0.27  | 0.93 | 1.86 | 0    | 1.43 |
| Col5a2   | 0.49  | 0.61 | 1.04 | 0    | 2.1  |
| Col5a3   | 1.78  | 1.36 | 2.5  | 2.59 | 2.72 |
| Col6a1   | 0.57  | 0.47 | 2.79 | 0    | 3.16 |

|          |      |      |      |      |      |
|----------|------|------|------|------|------|
| Col6a2   | 0.45 | 0    | 1.64 | 0    | 1.08 |
| Col6a3   | 1.43 | 0.72 | 0.87 | 0.85 | 3.27 |
| Col6a5   | NA   | NA   | 0.8  | 0.87 | NA   |
| Col6a6   | NA   | NA   | NA   | 0    | NA   |
| Col7a1   | 0.34 | 0    | 2.36 | NA   | 0    |
| Col8a1   | 0.53 | 0    | 0.12 | 2    | 0.04 |
| Col8a2   | 2.29 | 1.83 | 1.27 | 1.15 | 5.25 |
| Col9a1   | 0.35 | 1.45 | 1.03 | 1.41 | 0    |
| Col9a2   | 0.53 | 2.08 | 0.54 | 1.21 | 0    |
| Col9a3   | 4.19 | 1.84 | 0.94 | NA   | 0.41 |
| Colec10  | NA   | 2.87 | 0    | 0.13 | 1.21 |
| Colec11  | 1.32 | 2.34 | 0.2  | 1.21 | 0    |
| Colec12  | 0.27 | 1.41 | 0.45 | 1.99 | 2.12 |
| Colgalt2 | NA   | 2.48 | 1.84 | 0.74 | NA   |
| Colq     | NA   | 0    | 0    | 1.21 | 1.79 |
| Commd1   | 0.44 | NA   | 0.2  | 1.45 | 1.98 |
| Commd10  | 0.34 | 1.03 | 0.83 | 0.8  | 0    |
| Commd2   | 1.34 | NA   | 1.06 | 0.7  | 1.56 |
| Commd3   | NA   | 0    | 1.74 | NA   | 0    |
| Commd4   | 3.71 | 0.77 | 1.41 | 1.76 | 0.64 |
| Commd5   | 0.75 | NA   | 0    | 0.15 | 0.08 |
| Commd6   | 0.63 | NA   | 0    | 1.63 | 2.41 |
| Commd7   | 0.02 | NA   | 2.25 | 0    | NA   |
| Commd8   | 0    | 2.33 | 2.37 | 0.13 | 0    |
| Commd9   | 0    | 0.3  | 2.93 | 0    | 0    |
| Comp     | 0.9  | 2.98 | 1.35 | 0    | 0    |
| Comt     | 0.73 | 0.8  | 1.03 | 1.58 | NA   |
| Comtd1   | 0    | NA   | 1.14 | 1.22 | 1.89 |
| Copa     | 0.56 | 0.43 | 0.04 | NA   | 0    |
| Copb1    | 0    | 0.3  | 2.49 | 0.04 | 1.22 |
| Copb2    | 0.25 | 0.37 | 2.55 | 0.18 | 0.94 |
| Cope     | 0.3  | 1.02 | 0.56 | 1.58 | 0.86 |
| Copg     | 0    | NA   | NA   | NA   | 0.81 |
| Copg1    | NA   | 1.66 | 0.95 | 0    | NA   |
| Copg2    | 0.98 | NA   | 0.61 | NA   | 0.64 |
| Coprs    | NA   | NA   | 2.34 | 1.41 | NA   |
| Cops2    | 0    | 2.18 | 0.32 | 0.67 | 0    |
| Cops3    | 0    | 0.8  | 0.48 | 0.38 | 2.51 |
| Cops4    | 0.18 | 1.14 | 0    | 0.61 | 0.85 |
| Cops5    | 0    | 0.02 | 1.54 | 2.11 | 0    |
| Cops6    | 0.69 | 1.17 | 0.54 | 1.5  | 1.44 |

|        |      |      |      |       |      |
|--------|------|------|------|-------|------|
| Cops7a | 0    | 1.56 | 0.71 | 0.69  | 0    |
| Cops7b | 0.78 | 0    | 1.4  | 1.17  | 0.81 |
| Cops8  | 0.54 | 0.74 | 1.09 | 0     | 1.57 |
| Copz1  | 1.55 | 0    | 0.69 | 0     | 0    |
| Copz2  | 0.59 | 0.46 | 1.92 | 4.27  | 3.63 |
| Coq10a | NA   | NA   | 1.27 | 0.35  | 0    |
| Coq10b | NA   | 0.27 | 2.25 | 1.12  | 0    |
| Coq2   | NA   | 0    | 1.58 | 0.89  | 3.47 |
| Coq3   | 0    | 0    | 1.68 | 1.36  | 0.7  |
| Coq4   | 2.18 | 3.27 | 1.28 | 11.58 | 0    |
| Coq5   | NA   | NA   | 0.42 | 0.77  | 0    |
| Coq6   | 0.11 | 0    | 0.55 | 0     | 2.94 |
| Coq7   | 0.34 | 0    | 2    | 0.64  | 2.39 |
| Coq9   | NA   | 0    | 1.4  | 1.16  | 0.88 |
| Corin  | 1.83 | 0    | 1.47 | 1.53  | 0    |
| Coro1a | 0.01 | 1.9  | 2.41 | 0     | 1.19 |
| Coro1b | 0.53 | 1.66 | 3.25 | 1.03  | 0    |
| Coro1c | 0.04 | 0.46 | 1.03 | 0.62  | 0    |
| Coro2a | 0.41 | 0.98 | 0.99 | 0.99  | 1.36 |
| Coro2b | 0.58 | 1.92 | 0.71 | 0.38  | 2.07 |
| Coro6  | 1.01 | NA   | 0.75 | 1.08  | NA   |
| Coro7  | NA   | 0    | 0.6  | 1.3   | 0    |
| Cort   | 0.97 | 2.28 | 4.82 | NA    | 11.5 |
| Cotl1  | 0    | 2.43 | 0.22 | 1.42  | 1.69 |
| Coval  | 1.45 | NA   | NA   | NA    | NA   |
| Cox10  | 0.08 | 0.81 | 0.42 | 3.23  | 0    |
| Cox11  | 0.65 | 0.27 | 1.48 | 1.18  | 0    |
| Cox14  | NA   | NA   | 0.82 | 0.6   | NA   |
| Cox15  | 0.35 | 0.48 | 0.81 | 0.96  | 0    |
| Cox16  | NA   | 1.17 | 0    | 2.63  | 1.59 |
| Cox17  | 1.69 | 0    | 1.87 | 1.02  | 1    |
| Cox18  | NA   | NA   | 0.62 | 0.88  | 2.4  |
| Cox19  | NA   | NA   | 2.28 | 0     | 0    |
| Cox20  | NA   | 0.21 | 1.4  | NA    | NA   |
| Cox4i1 | 0.66 | 0.8  | 2.43 | 0.15  | 0    |
| Cox4i2 | 3.42 | NA   | 2.63 | 1.22  | 0.18 |
| Cox4nb | NA   | NA   | NA   | NA    | 0    |
| Cox5a  | 0    | 0.71 | 1.11 | 0.39  | 0    |
| Cox5b  | 0.33 | 0    | 1.58 | 0     | 0    |
| Cox6a1 | 0.5  | 1.83 | 1.16 | 0     | 1.21 |
| Cox6a2 | 0.5  | 0.89 | 0    | 1.95  | 2.69 |

|         |      |      |      |      |      |
|---------|------|------|------|------|------|
| Cox6b1  | NA   | 0.02 | 2.07 | 0.42 | 0    |
| Cox6b2  | NA   | NA   | 2.82 | 1.79 | NA   |
| Cox6c   | 1.62 | 1.01 | 0.83 | 4.31 | 0    |
| Cox7a1  | 0.74 | 0.94 | 3.07 | 1.43 | 0.7  |
| Cox7a2  | 0.15 | 1.16 | 2.01 | 1.26 | 0.57 |
| Cox7a2l | 0.14 | 3.26 | 2.14 | 0.75 | 0    |
| Cox7b   | 0.41 | NA   | NA   | 0    | NA   |
| Cox7b2  | NA   | NA   | 0.76 | 0.98 | 0    |
| Cox7c   | 0.62 | 1.82 | 2.38 | NA   | NA   |
| Cox8a   | 1.16 | 1.8  | 3.46 | 0    | 1.21 |
| Cox8c   | 0.95 | NA   | 1.28 | 2.18 | 0.03 |
| Cp      | 0.46 | 1.33 | 1.3  | 2.26 | 2.18 |
| Cpa1    | 0.95 | 2.79 | 1.2  | 1.31 | 7.12 |
| Cpa2    | NA   | 1.52 | 0.07 | 1.21 | 1.84 |
| Cpa3    | 0.64 | 0    | 0.03 | 0    | 2.51 |
| Cpa4    | 1.06 | 1.56 | 0.21 | 0    | 0    |
| Cpa5    | 1.39 | NA   | 2.28 | 1.01 | 1.63 |
| Cpa6    | NA   | NA   | 3.03 | 0    | 0    |
| Cpb1    | 1.42 | 2.44 | 3.08 | 2.15 | 0.02 |
| Cpb2    | 1.6  | 0.86 | 0.62 | 1.81 | 1.3  |
| Cpd     | 0.26 | 0.09 | 3.07 | 0    | 0    |
| Cpe     | 2.92 | 0.92 | 1.04 | 1.47 | NA   |
| Cpeb1   | 2.57 | 0.19 | 0.41 | 0    | 1.47 |
| Cpeb2   | 0.72 | NA   | 0.07 | 1.51 | 1.9  |
| Cpeb3   | 0    | 1.15 | 0.19 | 2.63 | 0.63 |
| Cpeb4   | 1.51 | NA   | 1.63 | 1.38 | 3.08 |
| Cped1   | NA   | 1.23 | 1.01 | 1.56 | NA   |
| Cplx1   | 2.27 | NA   | 0.1  | 3.52 | 0.92 |
| Cplx2   | 2.13 | 0.89 | 0.03 | 1.38 | 0    |
| Cplx3   | NA   | 3.04 | 1.53 | 0.63 | NA   |
| Cplx4   | NA   | NA   | NA   | 0.69 | NA   |
| Cpm     | 0    | 2.25 | 2.76 | 0.45 | 2.18 |
| Cpn1    | 0.46 | 0.34 | 2.95 | 0.56 | 0    |
| Cpn2    | NA   | 1.44 | 0.92 | 1.33 | 0.21 |
| Cpne1   | 0    | 2.29 | 0.38 | NA   | 0.68 |
| Cpne2   | 0.26 | NA   | 1.52 | 1.32 | 0.23 |
| Cpne3   | 0    | 0.56 | 4.11 | 0.54 | 1.24 |
| Cpne4   | 1.27 | NA   | 0.59 | 1.85 | 0    |
| Cpne5   | 7.1  | NA   | 0    | 0    | 3.37 |
| Cpne6   | 0    | 1.36 | 4.86 | 0.61 | 5.99 |
| Cpne7   | 0    | 2.26 | 1.38 | 1.15 | 1.24 |



|         |       |      |      |      |      |
|---------|-------|------|------|------|------|
| Cpne8   | 0.27  | NA   | 1    | 0    | 0    |
| Cpne9   | NA    | NA   | 1.26 | 0.7  | 0    |
| Cpo     | 2.11  | NA   | NA   | NA   | NA   |
| Cpox    | 0.64  | 1.52 | 1.6  | 1.58 | 0    |
| Cpped1  | NA    | 0    | 1.35 | 0.2  | 0    |
| Cpq     | NA    | 1.39 | 1.36 | 1.2  | NA   |
| Cps1    | 0.28  | 2.03 | 0    | 1.69 | 4.58 |
| Cpsf1   | 0.53  | 0    | 3.98 | 0    | 3.33 |
| Cpsf2   | 0.13  | NA   | 4.08 | 0.84 | 0.45 |
| Cpsf3   | 0     | NA   | 1.51 | 1.3  | 0    |
| Cpsf3l  | NA    | 0    | 0.16 | NA   | 0    |
| Cpsf4   | 2.96  | 0.86 | 1.17 | 1.11 | 0    |
| Cpsf4l  | NA    | NA   | NA   | 0.73 | NA   |
| Cpsf6   | 0     | 0.04 | 0.19 | 2.48 | 0    |
| Cpsf7   | NA    | 0    | 2.08 | 1.83 | 1.79 |
| Cpt1a   | 1.14  | 1.45 | 1.62 | 1.14 | 0    |
| Cpt1b   | 0.79  | NA   | NA   | NA   | NA   |
| Cpt1c   | 1.58  | NA   | 0.88 | 0.03 | 2.07 |
| Cpt2    | 0.04  | 0.66 | 0.85 | 0    | 0    |
| Cpvl    | 0.01  | 0.14 | 1.77 | 1.87 | 5.61 |
| Cpxcr1  | NA    | NA   | NA   | 1.7  | NA   |
| Cpxm1   | 4.03  | NA   | 1.95 | 0.27 | 0    |
| Cpxm2   | 1.24  | NA   | 1.38 | 1.48 | 1.76 |
| Cpz     | 0     | NA   | NA   | 2.09 | 3.04 |
| Cr1l    | NA    | NA   | 0.51 | 1.17 | 3.25 |
| Cr2     | 0.43  | 0    | 3.72 | 1.77 | 0.8  |
| Crabp1  | 0.87  | 3.25 | 0    | 1.4  | 0    |
| Crabp2  | 0.42  | 0    | 0    | 0    | 1.84 |
| Cradd   | 1.11  | 0    | 1.42 | 1.15 | 0    |
| Cramp1l | NA    | NA   | 2.04 | 2.83 | 0    |
| Crat    | 0.56  | 0.49 | 1.83 | 0.46 | 0.73 |
| Crb1    | 0.47  | 0.03 | 0.9  | 0.85 | 2    |
| Crb2    | NA    | NA   | NA   | 0.51 | NA   |
| Crb3    | 10.95 | NA   | 0    | 0.92 | 1.58 |
| Crbn    | 0.54  | 3.48 | 0.69 | 2.8  | 2.06 |
| Crcp    | NA    | 0.88 | 1.1  | 0.96 | NA   |
| Crcr1   | NA    | 0.63 | 0.04 | 2.42 | 0    |
| Creb1   | 0.39  | 0.91 | 1.95 | 0.79 | 0    |
| Creb3   | 0.22  | 0.86 | 0.87 | NA   | 0    |
| Creb3l1 | 3.2   | 2.11 | 0    | 0.94 | 0    |
| Creb3l2 | 0     | 1.44 | 0.88 | 1.61 | 1.37 |

|          |      |      |      |      |       |
|----------|------|------|------|------|-------|
| Creb3l3  | 0.28 | NA   | 1.91 | 1.32 | 1.42  |
| Creb3l4  | 0    | NA   | 2.04 | 1.24 | 5.47  |
| Creb5    | 0.86 | 0    | 0.77 | NA   | 1.47  |
| Crebbp   | 0.38 | 0    | 1.15 | 1.8  | 0     |
| Crebl1   | 1.86 | NA   | NA   | NA   | NA    |
| Crebl2   | NA   | 0    | 0.98 | 2.72 | 5.84  |
| Crebrf   | NA   | NA   | 1.36 | 3.03 | NA    |
| Crebzf   | NA   | 0.29 | 0.52 | 2.19 | 0     |
| Creg1    | NA   | 3    | 2    | 0.6  | 0.52  |
| Creg2    | 6.47 | NA   | 0.83 | 0.87 | NA    |
| Creld1   | 0.75 | 0.19 | 1.14 | 0.91 | 0.32  |
| Creld2   | NA   | 1.9  | 1.51 | 0.82 | 5.26  |
| Crem     | 1.4  | 0.41 | 1.31 | 2    | 0     |
| Crh      | 2.48 | 0    | 0    | 1    | 3.52  |
| Crhbp    | 3.76 | 2.83 | 0    | 0    | 0.19  |
| Crhr1    | 0    | 0.17 | 1.52 | 0.26 | 1.37  |
| Crhr2    | 0    | 0.74 | 0.34 | 0    | 3.22  |
| Crim1    | 0    | 1.26 | 0.41 | 2.52 | 2.29  |
| Crip1    | 1.05 | 0.81 | 0.97 | 0.32 | 0     |
| Crip2    | 1    | 0    | 2.04 | 2.31 | 0     |
| Crip3    | 2.17 | NA   | 0    | 0.97 | 2.3   |
| Cript    | NA   | 1.3  | 1.63 | 0.92 | 0.24  |
| Crisp1   | 1.02 | 0.19 | 0    | 6.41 | 0     |
| Crisp2   | 1.01 | 1.04 | 1.6  | 2.2  | 0     |
| Crisp3   | 0    | 3.72 | 0.35 | 0.24 | 0     |
| Crispld1 | NA   | NA   | 0.75 | 0.41 | 0     |
| Crispld2 | NA   | 3.25 | 1.04 | 0    | 0     |
| Crk      | 0.61 | 0.18 | 1.03 | 0.08 | 2.9   |
| Crkl     | 0    | 0.31 | 0.95 | 2.86 | 0.52  |
| Crlf1    | 1.35 | 1.5  | 1.67 | 0.87 | 0     |
| Crlf2    | NA   | 3.32 | 2.69 | 1.61 | 0     |
| Crlf3    | 0    | 0.59 | 0.69 | 0.8  | 2.69  |
| Crls1    | NA   | NA   | 2.46 | 1.07 | 0     |
| Crmp1    | 0    | 1.16 | 3.28 | 1.18 | 5.27  |
| Crnk1l   | 0    | 1.14 | 1.33 | 0    | 4.75  |
| Crnn     | NA   | NA   | NA   | 2.61 | NA    |
| Crocc    | NA   | 0.89 | 1.81 | 1.95 | 0.09  |
| Crot     | 0    | 0.06 | 1.14 | 0.48 | 0.01  |
| Crp      | 0.94 | 1.21 | 0.93 | 0.9  | 21.17 |
| Crsp2    | 1.56 | NA   | NA   | NA   | NA    |
| Crsp3    | 0    | NA   | NA   | NA   | NA    |

|        |      |      |      |      |      |
|--------|------|------|------|------|------|
| Crsp6  | 1.48 | NA   | NA   | NA   | NA   |
| Crsp7  | 0.59 | NA   | NA   | NA   | NA   |
| Crsp8  | 0.34 | NA   | NA   | NA   | NA   |
| Crsp9  | 1.41 | NA   | NA   | NA   | NA   |
| Crtac1 | 3.31 | 0.56 | 0.2  | 1.02 | 0.42 |
| Crtam  | 0.54 | 0    | 2.57 | 0    | 6.42 |
| Crtap  | 0.3  | 0.03 | 0.63 | 8.56 | 3.75 |
| Crtc1  | NA   | 0.21 | 0.97 | 1.09 | 0.6  |
| Crtc2  | NA   | NA   | 1.87 | 2.13 | 1.76 |
| Crtc3  | NA   | 2.15 | 1.87 | 2.04 | 0.85 |
| Crx    | 0.5  | 1.59 | 0.49 | 1.66 | 0.73 |
| Cry1   | 0.32 | 2.2  | 2.82 | 3.61 | 6.36 |
| Cry2   | 0.52 | 0    | 1.41 | 0.31 | 1.9  |
| Cryaa  | 0    | 3.28 | 0.91 | 1.21 | 4.32 |
| Cryab  | 2.67 | 0.78 | 1.07 | NA   | 3.06 |
| Cryba1 | 0    | 1.44 | 1.83 | 1.77 | 0    |
| Cryba2 | 0    | 3.49 | 0.18 | 1.32 | 0.55 |
| Cryba4 | 2.05 | 2.26 | 1.92 | 2.2  | 3.66 |
| Crybb1 | 1.79 | 1.76 | 0.68 | 1.18 | 0    |
| Crybb2 | 0    | 1.99 | 0.82 | 4.03 | 0    |
| Crybb3 | 0.23 | 1.32 | 0    | 0.96 | 0    |
| Crybg3 | NA   | 1.51 | 1.11 | 0    | 3.82 |
| Cryga  | 0.99 | 1.25 | 0.65 | 6.3  | 0    |
| Crygb  | 0.82 | 1.77 | 0    | NA   | 0    |
| Crygc  | 0.64 | 0.14 | 1.17 | 1.07 | NA   |
| Crygd  | 1.93 | 3.17 | 0.94 | 1.86 | 0    |
| Crygn  | 4.61 | NA   | 0.18 | 1.63 | NA   |
| Crygs  | 1.18 | NA   | 1.18 | NA   | 2.59 |
| Cryl1  | 0.24 | 0    | 1.58 | 0.87 | 0    |
| Crym   | 0.81 | 1.54 | 1.05 | 0.14 | 0    |
| Cryz   | 0.33 | 0.04 | 3.27 | 0.19 | 0    |
| Cryzl1 | 0.04 | 1.01 | 2.38 | 1.11 | 0    |
| Cs     | 0    | 2.41 | 0.88 | 1.92 | 0    |
| Csad   | 1.13 | 1.4  | 1.17 | 2.23 | 1.77 |
| Csda   | 1.2  | NA   | NA   | NA   | 0.04 |
| Csdc2  | NA   | 2.13 | 0.21 | 4.5  | 0    |
| Csde1  | NA   | 0.58 | 1.68 | 0.66 | 1.95 |
| Cse11  | 0.09 | 0.45 | 1.56 | 0    | 0    |
| Csfl   | 0.45 | 2.01 | 4.05 | 1.99 | 0    |
| Csflr  | 0.78 | 2.74 | 2.14 | 0.83 | 0    |
| Csf2   | 0.02 | 0.71 | 1.06 | 2.01 | 1.52 |

|            |      |      |      |       |      |
|------------|------|------|------|-------|------|
| Csf2ra     | 0    | 0    | 1.37 | 0.85  | 1    |
| Csf2rb     | NA   | 3.62 | 2.67 | 2.78  | 0    |
| Csf3       | 1.02 | 0.61 | 3.7  | 0.55  | 0    |
| Csf3r      | 0.37 | 1.44 | 1.46 | 0.73  | 0    |
| Csgalnact1 | NA   | 1.58 | 1.79 | 0.24  | 0    |
| Csgalnact2 | NA   | 0.1  | 2.92 | 1.39  | 2.14 |
| Csh1       | 0.29 | NA   | NA   | NA    | NA   |
| Csk        | 0    | 3.39 | 1.47 | 1.85  | 1.9  |
| Csmd1      | 0    | NA   | 0.5  | 1.36  | 2.76 |
| Csmd2      | 0    | NA   | 0.05 | 0     | 0    |
| Csmd3      | 0.34 | NA   | 1.04 | 1.01  | 2.26 |
| Csn1s1     | NA   | 1.49 | 0    | 2.6   | 2.68 |
| Csn2       | NA   | 3.91 | 0.95 | 1.11  | 2.63 |
| Csn3       | NA   | 0    | 0.43 | 1.8   | 0.93 |
| Csnk1a1    | 0.67 | 0.4  | 0.77 | 0.59  | 0.64 |
| Csnk1d     | 0.65 | 0.88 | 1.31 | 0     | 0    |
| Csnk1e     | 0.25 | 0.82 | 0.08 | NA    | 0.27 |
| Csnk1g1    | 0.82 | 0    | 1.2  | 0.64  | 0.73 |
| Csnk1g2    | 0.68 | 0.14 | 1.4  | 1.06  | 1.11 |
| Csnk1g3    | 0.62 | 2.88 | 1.14 | 0.17  | 0    |
| Csnk2a1    | 0.49 | 0.4  | 0.48 | NA    | 0    |
| Csnk2a2    | 0.32 | 1.12 | 1.98 | 1.24  | 1.75 |
| Csnk2b     | 2.05 | 2.39 | 0.38 | 0     | 0    |
| Cspg4      | 0    | 0.92 | 0.58 | 0     | 2.06 |
| Cspg5      | 0.38 | 0.59 | 0.34 | 2.94  | 2.33 |
| Cspp1      | NA   | 0.1  | 0.63 | 0.07  | 0.13 |
| Csrnp1     | NA   | NA   | 2.29 | 0.31  | 0    |
| Csrnp2     | NA   | 0.84 | 3.9  | 1.56  | 0.99 |
| Csrnp3     | NA   | 1.17 | 0.72 | 1.72  | 0.44 |
| Csrp1      | 0    | 1.41 | 3.36 | 1.28  | 0    |
| Csrp2      | 0.47 | 2.59 | 0.93 | 1.11  | 1.53 |
| Csrp2bp    | 0.1  | NA   | 1.05 | NA    | 0    |
| Csrp3      | 0.53 | 1.42 | 2.92 | 0.09  | 2.05 |
| Cst11      | 0    | NA   | 2.37 | 0.75  | 0    |
| Cst3       | 3.13 | 2.62 | 2.58 | 10.62 | 0.06 |
| Cst6       | 0    | 0.25 | 1.44 | 0     | 0    |
| Cst7       | 0.34 | 0.72 | 0.29 | 0.85  | 0.29 |
| Cst8       | 2.31 | 1.03 | 1.92 | 0.81  | 1.87 |
| Cst9       | 0    | NA   | 1.06 | 0.99  | NA   |
| Csta       | NA   | 0    | 4.28 | 0     | 0    |
| Cstb       | 0.26 | 0.53 | 0.6  | 0.11  | 0.18 |

|          |      |      |      |      |      |
|----------|------|------|------|------|------|
| Cstf1    | 0.52 | 0    | 0.95 | 3.44 | 0    |
| Cstf2    | 0    | 0    | 2.35 | 1.57 | 0.77 |
| Cstf2t   | 0.92 | 0.95 | 0.15 | 4.12 | 0    |
| Cstf3    | 0.54 | 0    | 0.49 | 0    | 0.97 |
| Cstl1    | 3.69 | NA   | NA   | 1.77 | NA   |
| Ctag2    | NA   | 2.53 | 0    | 0.72 | 0    |
| Ctage5   | NA   | 0    | 2.9  | 1.09 | 1.23 |
| Ctbp1    | 0    | 0    | 0.72 | 2.2  | NA   |
| Ctbp2    | 0.3  | 0.04 | 2.28 | 0    | 0.78 |
| Ctbs     | 0.71 | 0.8  | 2.09 | 0.73 | 1.01 |
| Ctc1     | NA   | 0    | 1.16 | 0    | NA   |
| Ctcf     | 0.64 | 0    | 0.65 | 0    | 0    |
| Ctcf1    | NA   | NA   | NA   | 0.7  | NA   |
| Ctdnep1  | NA   | 2.55 | 0.15 | 0.19 | NA   |
| Ctdp1    | 0.5  | 1.79 | 1.65 | 3.23 | 2.1  |
| Ctdsp1   | 0.88 | 1.63 | 1.65 | 1.26 | 0    |
| Ctdsp2   | 0.95 | 0    | 1.36 | 0    | 0.78 |
| Ctdspl   | 0.08 | 1.4  | 1.3  | 1.55 | 6.89 |
| Ctdspl2  | NA   | NA   | 0.5  | 1.27 | 0    |
| Ctf1     | 1.09 | 1.47 | 0    | 2.22 | 2.46 |
| Ctgf     | 0.99 | 1.25 | 2.36 | 0.94 | 0.77 |
| Cth      | 0.47 | 1.11 | 0.11 | 1.55 | 0.88 |
| Cthrc1   | 0    | NA   | 3.11 | 0.61 | 2.41 |
| Ctif     | NA   | 0.69 | 0    | 0.72 | NA   |
| Ctla4    | 0.51 | 1.46 | 2.42 | 1.37 | 1.6  |
| Ctnna1   | NA   | 0.73 | 1.57 | 0    | 0    |
| Ctnna2   | NA   | 2.23 | 4.57 | 0.86 | 4.62 |
| Ctnna3   | NA   | 1.46 | 0    | 2.7  | 0    |
| Ctnnal1  | NA   | 2.1  | 0    | 0.25 | 0    |
| Ctnnb1   | NA   | 0.3  | 1.15 | 0    | 0    |
| Ctnnbip1 | NA   | 1.83 | 3.09 | NA   | 1.36 |
| Ctnnb11  | 1.04 | 1.5  | 1.22 | 2.82 | 3.09 |
| Ctnnd1   | NA   | 2.15 | 0.37 | NA   | 0.17 |
| Ctnnd2   | NA   | 1.23 | 2.26 | 1.68 | NA   |
| Ctns     | 0.35 | 0.58 | 2.34 | 0    | 1.86 |
| Ctps     | 0.26 | NA   | NA   | NA   | 3.84 |
| Ctps2    | 0    | 1.88 | 0.28 | 1.1  | 0    |
| Ctr9     | NA   | 0.05 | 1.13 | 0.64 | 1.17 |
| Ctrc     | 1.23 | 0    | 2.03 | 0.91 | 0.08 |
| Ctrl     | 0.17 | 0.14 | 0.2  | 0.52 | 2.42 |
| Ctsa     | NA   | 0.85 | 1.68 | 0    | 0.7  |

|           |      |      |      |      |      |
|-----------|------|------|------|------|------|
| Ctsb      | 0.73 | 1.08 | 1.26 | NA   | 0.69 |
| Ctsc      | 0.34 | 1.46 | 3.34 | 0.62 | 0    |
| Ctsd      | NA   | 1.41 | 0.51 | 3.39 | 0    |
| Ctse      | 1.27 | 2.36 | 3.42 | 2.05 | 2.41 |
| Ctsf      | 2.82 | 0.03 | 0.93 | 0.34 | 1.45 |
| Ctsg      | 5.78 | 1.07 | 1.11 | 3.99 | 0    |
| Ctsh      | 0.44 | 3.01 | 0.8  | 0.81 | 1.44 |
| Ctsk      | 0    | 0.22 | 3.31 | 1.76 | 0.82 |
| Ctso      | 1.4  | 0    | 2.21 | 3.34 | 0    |
| Ctss      | 0.56 | 2.11 | 2.43 | 0.12 | 2.02 |
| Ctsw      | 0    | 0.07 | 0.89 | 1.15 | 2.98 |
| Ctsz      | 2.61 | 0.99 | 1.28 | 1.57 | 1.67 |
| Ctnn      | 0    | 1.23 | 0.94 | 0.38 | 0    |
| Ctnnbp2   | 1.78 | NA   | 2.61 | 0    | 0    |
| Ctnnbp2nl | NA   | NA   | 2.67 | 0    | 0.03 |
| Ctu1      | NA   | NA   | NA   | 1.1  | NA   |
| Ctu2      | NA   | NA   | 5.73 | 2.1  | 0.21 |
| Ctxn1     | NA   | NA   | 1.56 | 1.58 | 3.26 |
| Ctxn3     | NA   | NA   | 1.36 | 0.93 | 2.14 |
| Cubn      | 1.23 | 2.32 | 1.64 | 0    | 2.39 |
| Cuedc1    | 3.34 | 0.54 | 1.21 | 0.32 | 0.36 |
| Cuedc2    | 0.41 | 0.05 | 1.95 | NA   | 0    |
| Cugbp1    | 0.33 | NA   | NA   | NA   | NA   |
| Cugbp2    | 0    | NA   | NA   | NA   | NA   |
| Cul1      | 0.48 | 0.27 | 1.64 | 0.2  | 1    |
| Cul2      | 0.06 | 0.73 | 1.88 | 0.52 | 0    |
| Cul3      | 0.99 | 0    | 1.6  | 0    | 0.87 |
| Cul4a     | 0.5  | 0.18 | 0.06 | 0    | 0    |
| Cul4b     | 1.4  | 1.83 | 1.69 | 1.03 | 0    |
| Cul5      | 0.48 | 0.28 | 1.59 | 0.32 | 0    |
| Cul7      | 0.6  | 0.43 | 1.51 | 0    | 0    |
| Cul9      | NA   | 0    | 1.5  | 1.65 | 2.07 |
| Cuta      | NA   | 0    | 2.34 | 0    | 0    |
| Cutc      | 0    | 2.97 | 4.23 | 0    | 0    |
| Cutl1     | 1.14 | NA   | NA   | NA   | NA   |
| Cutl2     | 0.52 | NA   | NA   | NA   | NA   |
| Cux1      | NA   | 1.18 | 0.62 | 0    | 1.43 |
| Cux2      | NA   | 0    | 0.53 | 0.27 | 0    |
| Cuzd1     | 0    | 2.22 | 0    | 0.48 | 0.75 |
| Cwc15     | NA   | NA   | 1.46 | 1.27 | 0    |
| Cwc22     | NA   | NA   | 0    | 0.52 | 3.37 |

|          |       |      |       |       |       |
|----------|-------|------|-------|-------|-------|
| Cwc25    | NA    | 1.6  | 1.66  | 0.53  | NA    |
| Cwc27    | NA    | NA   | 2.34  | 1.16  | NA    |
| Cwf1911  | 0     | 1.3  | 0     | 0.95  | 0     |
| Cwf1912  | 0     | NA   | 0.98  | 0.2   | 2.99  |
| Cwh43    | NA    | 1.42 | 1.25  | 2.34  | 3     |
| Cx3cl1   | 0.95  | 0.59 | 1.31  | 0.03  | 1.82  |
| Cx3cr1   | 2.14  | 0.21 | 2.17  | 0.75  | 0     |
| Cxadr    | 0.43  | 0.92 | 0.86  | 0.02  | 1.1   |
| Cxcl1    | 0.18  | 1.1  | 0.78  | NA    | 0     |
| Cxcl10   | 0.09  | 0.75 | 0.43  | 0     | 0     |
| Cxcl11   | 0     | 0    | 11.65 | 3.19  | 0     |
| Cxcl12   | 0.03  | 1.22 | 1.13  | 1.06  | 0.8   |
| Cxcl13   | 0     | 1.6  | 0.2   | 1.02  | 10.07 |
| Cxcl14   | 0.58  | 1.52 | 1.08  | 3.58  | 0     |
| Cxcl16   | 0.21  | NA   | 2.5   | 2.2   | 0.04  |
| Cxcl17   | NA    | NA   | 1.54  | 0.58  | 5.33  |
| Cxcl2    | 0.18  | 0.75 | 0.79  | 1.79  | 0     |
| Cxcl3    | NA    | 0.63 | 0     | 2.1   | 4.19  |
| Cxcl5    | 0.44  | 1.01 | 0.09  | 2.61  | 0.75  |
| Cxcl9    | 0     | 0.78 | 0     | 1.4   | 0     |
| Cxcr1    | NA    | NA   | NA    | 0.86  | NA    |
| Cxcr2    | NA    | 2.92 | 2.36  | 1.88  | NA    |
| Cxcr3    | 1.15  | 0    | 3.15  | 1.85  | 0     |
| Cxcr4    | 0.1   | 0    | 2.77  | 1.64  | 0     |
| Cxcr5    | NA    | 0.06 | 0.94  | 0.06  | 0.05  |
| Cxcr6    | 1.64  | 0    | 0.45  | 0.93  | 0.93  |
| Cxcr7    | NA    | 2.47 | 0.68  | 2.84  | 0     |
| Cxxc1    | 0     | 0    | 0.2   | 0.5   | 0     |
| Cxxc4    | 0     | 0.9  | 0.82  | 0.28  | 0     |
| Cxxc5    | 0.46  | NA   | 0.7   | 1.49  | 0     |
| Cxxc6    | 0.59  | NA   | NA    | NA    | NA    |
| Cyb561   | 1.22  | 1.36 | 2.84  | 2.73  | 0.12  |
| Cyb561a3 | NA    | NA   | 1.19  | 14.13 | NA    |
| Cyb561d1 | 10.67 | NA   | 0     | 1.1   | 0     |
| Cyb561d2 | 0     | 1.4  | 0.17  | 0     | 0     |
| Cyb5b    | NA    | 0    | 0.53  | 0.18  | 0     |
| Cyb5d1   | NA    | NA   | 2.06  | 0.83  | NA    |
| Cyb5d2   | NA    | NA   | 0.39  | 0.29  | 2.29  |
| Cyb5r1   | NA    | 0.89 | 4.19  | 0.64  | 0.98  |
| Cyb5r2   | NA    | 3.01 | 0     | 0.84  | 4.09  |
| Cyb5r3   | NA    | 1.45 | 2.99  | 1.47  | 0     |

|         |      |      |      |      |      |
|---------|------|------|------|------|------|
| Cyb5r4  | NA   | 1.7  | 5.02 | 0.62 | 0.11 |
| Cyb5rl  | NA   | NA   | 2.68 | 0    | 0    |
| Cyba    | 0.8  | 0    | 2.33 | 0.3  | 0    |
| Cybasc3 | NA   | NA   | NA   | NA   | 0    |
| Cybb    | 0.99 | 0    | 2.14 | 1.74 | 0.36 |
| Cybrd1  | 0.6  | 1.29 | 0.3  | 1.39 | 0.92 |
| Cyc1    | 0.35 | 0.36 | 1.96 | 1.55 | 0    |
| Cycs    | 0.36 | 2.21 | 0.76 | 0.04 | 0    |
| Cyfip1  | 0.99 | 1.58 | 1.23 | 0    | 1.95 |
| Cyfip2  | 0.53 | 0.81 | 1.26 | 0    | 2.76 |
| Cygb    | 0    | NA   | 0    | 0.63 | 3.83 |
| Cyhr1   | 0.5  | 1.89 | 0.84 | 1.44 | 0    |
| Cylc1   | 4.48 | 0    | 0.94 | 0.58 | 0    |
| Cylc2   | NA   | 0.31 | 2.29 | 3.28 | 0.24 |
| Cyld    | 0.9  | 0.84 | 1.3  | 0.61 | 0.16 |
| Cyp11a1 | 0.3  | 0.95 | 0.7  | 3.57 | 2.28 |
| Cyp11b1 | NA   | 1.2  | 2.48 | 0.24 | 0    |
| Cyp11b2 | 2.37 | 4.78 | 1.55 | 1.02 | 1.94 |
| Cyp17a1 | 0.92 | 1.24 | 0    | 1.55 | 0    |
| Cyp19a1 | 1.53 | 1.68 | 0    | 3.99 | 0    |
| Cyp1a1  | 0.36 | 0.15 | 2.46 | 2.49 | 3.21 |
| Cyp1a2  | 1.75 | 1.51 | 0.43 | 2.11 | 1.16 |
| Cyp1b1  | 0    | 0    | 1.17 | 1.52 | 1.49 |
| Cyp20a1 | 0.68 | 0.94 | 3.19 | 0.46 | 0.16 |
| Cyp24a1 | 1.61 | 1.61 | 1.35 | 0    | 3.77 |
| Cyp26a1 | 0.77 | 2.52 | 0.68 | 0    | 0.63 |
| Cyp26b1 | 0    | 2.09 | 3.07 | 1.19 | 0.8  |
| Cyp26c1 | NA   | NA   | NA   | 0.43 | NA   |
| Cyp27a1 | 0.12 | 1.01 | 1.86 | 0.91 | 2.83 |
| Cyp27b1 | 0    | 0.82 | 2.49 | 4.17 | 4.01 |
| Cyp2e1  | 1.06 | 0    | 1.66 | 1.64 | 3.78 |
| Cyp2r1  | 1.34 | 0.79 | 2.59 | 1.16 | 3.18 |
| Cyp2s1  | 0.68 | NA   | 0    | 1.81 | 1.27 |
| Cyp2u1  | 0    | 0.09 | 0.3  | 3.38 | 1.12 |
| Cyp2w1  | NA   | 3.03 | 3.73 | 1.16 | 4.66 |
| Cyp39a1 | 0.91 | 2.51 | 2.26 | 1.73 | 3.03 |
| Cyp46a1 | 1.24 | 0.46 | 1.37 | 0.55 | 4.71 |
| Cyp4b1  | 0.22 | 1.61 | 1.05 | 1.42 | 1.52 |
| Cyp4x1  | 0.29 | NA   | 1.6  | 1.13 | 0.88 |
| Cyp7a1  | 0.5  | 2.81 | 1.95 | 0.62 | 1.66 |
| Cyp7b1  | 0    | 1.65 | 0.03 | 2.23 | 0.17 |



|           |      |      |      |       |      |
|-----------|------|------|------|-------|------|
| Cyp8b1    | 0.54 | NA   | 0.78 | 0.64  | 1.4  |
| Cyr61     | 0.94 | 0.97 | 1.39 | 0.46  | 1.76 |
| Cys1      | 1.74 | NA   | 0.13 | 2.78  | 0    |
| Cysltr1   | 0.62 | 1.02 | 1.66 | 5.25  | 0    |
| Cysltr2   | 4.1  | 0.89 | 2.32 | 1.92  | 0    |
| Cystm1    | NA   | NA   | 2.85 | 0     | NA   |
| Cyth1     | NA   | 0    | 1.06 | 0.69  | 1.3  |
| Cyth2     | NA   | 1.12 | 2.51 | 0.54  | 0    |
| Cyth3     | NA   | 1.25 | 1.1  | 1.58  | 0    |
| Cyth4     | NA   | 0.9  | 0.71 | 1.71  | 9    |
| Cytip     | NA   | 2.54 | 2.68 | 4.24  | 0    |
| Cytl1     | NA   | 1.24 | 9.23 | 2.81  | 2.77 |
| Cytsa     | NA   | NA   | NA   | NA    | 0    |
| Cytsb     | NA   | NA   | NA   | NA    | 0    |
| Cyyl1     | 3.14 | NA   | 0.34 | 1.84  | 9.01 |
| D15wsu75e | 0.93 | NA   | NA   | NA    | NA   |
| D2hgdh    | NA   | NA   | 0.92 | 0     | 2.03 |
| D4st1     | 0    | NA   | NA   | NA    | NA   |
| Daam1     | 0.69 | 0.45 | 0    | 0     | 0    |
| Daam2     | 4.87 | 0.1  | 0.34 | 0.82  | 0    |
| Dab1      | 0.61 | 0.67 | 0.95 | 1.1   | 0.49 |
| Dab2      | 0    | 1.32 | 1.61 | 1.81  | 1.4  |
| Dab2ip    | 0.49 | NA   | 2.93 | 1.58  | 0    |
| Dach1     | 0.66 | 0    | 0.94 | 1.17  | 1.24 |
| Dach2     | 0.62 | NA   | 1.11 | 1.61  | 0.36 |
| Dact1     | 0    | 3.25 | 2.13 | 2.21  | 0    |
| Dact2     | 0.31 | NA   | 0    | 0.87  | NA   |
| Dact3     | NA   | NA   | 0.56 | 1.38  | 0    |
| Dad1      | 0.01 | 0    | 2.25 | 11.18 | 0    |
| Dag1      | 0.74 | 0.24 | 0.29 | 0.53  | 0    |
| Dagla     | NA   | 2.04 | 0.73 | 0.96  | 0    |
| Daglb     | NA   | NA   | 0.72 | 3.74  | 0.07 |
| Dak       | NA   | 0    | 2.13 | 0.51  | 0.25 |
| Dalrd3    | NA   | 2.88 | 1.75 | NA    | 1.8  |
| Dancr     | NA   | NA   | 3.07 | NA    | NA   |
| Dand5     | NA   | NA   | 0.13 | 1.06  | NA   |
| Dao       | NA   | 1.57 | 1.05 | 1.38  | 2.47 |
| Dap       | 0.07 | 0.55 | 1.03 | 2.67  | 0    |
| Dap3      | 0.06 | 1.32 | 3.03 | 1.06  | 2.36 |
| Dapk1     | 0.61 | 0.17 | 5.38 | 3.61  | 0.68 |
| Dapk2     | 2.67 | 2.23 | 0.08 | 5.26  | 0    |

|          |      |      |      |      |      |
|----------|------|------|------|------|------|
| Dapk3    | 0.9  | 0.02 | 0.68 | 0.78 | 1.47 |
| Dapl1    | NA   | NA   | 1.95 | 0.01 | 0    |
| Dapp1    | 1.05 | 2.48 | 2.75 | 0.66 | 0    |
| Darc     | NA   | 1.41 | 1.02 | 5.75 | 2.13 |
| Dars     | 0.11 | 1.19 | 1.35 | 0.23 | 1.96 |
| Dars2    | NA   | 1.53 | 1.13 | NA   | 1.65 |
| Daw1     | NA   | NA   | 0    | 1.83 | NA   |
| Daxx     | 1.3  | 2.02 | 1.7  | 0.01 | 3    |
| Dazap1   | 0    | 2.6  | 0.71 | 0.41 | 2.16 |
| Dazap2   | 0    | 0    | 1.87 | 0    | 2.19 |
| Dazl     | 1.61 | 0.1  | 1.36 | 0.79 | 2.96 |
| Dbc1     | NA   | 0    | 1.29 | 0.38 | 0    |
| Dbf4     | NA   | 0    | 2.75 | 0.72 | 0    |
| Dbh      | 0.56 | 1.32 | 0.83 | 1.87 | 1.41 |
| Dbi      | 0.46 | 0    | 0.66 | 1.77 | 0    |
| Dbn1     | 0.66 | 1.46 | 1.94 | 1.79 | 0    |
| Dbnndd1  | NA   | 1.87 | 2.47 | 0.63 | 1.5  |
| Dbnl     | 0    | NA   | 0.66 | 1.16 | 0    |
| Dbp      | 0.02 | 0.56 | 2.58 | NA   | 0.31 |
| Dbpht2   | NA   | NA   | 1.09 | NA   | NA   |
| Dbr1     | 0.74 | 1.27 | 0.76 | 0.85 | 1.71 |
| Dbt      | 0.45 | 0.47 | 0.1  | 1.46 | 1.65 |
| Dbx1     | 2.74 | NA   | NA   | 1.56 | NA   |
| Dbx2     | 2.92 | NA   | NA   | 0.15 | NA   |
| Dcaf10   | NA   | 3.46 | 1.82 | 2.55 | 0    |
| Dcaf11   | NA   | 0.01 | 0    | 0.62 | 0    |
| Dcaf12   | NA   | NA   | 0.81 | 0.61 | 1.67 |
| Dcaf12l1 | NA   | NA   | 0    | 1.54 | 1.24 |
| Dcaf12l2 | NA   | NA   | NA   | 3    | NA   |
| Dcaf13   | NA   | 2.34 | 3.82 | 0    | 2.39 |
| Dcaf15   | NA   | 0.27 | 0.57 | 2.69 | 5.46 |
| Dcaf17   | NA   | 0.99 | 0.74 | 0.65 | 1.59 |
| Dcaf4    | NA   | 0.49 | 2.25 | 0.26 | 0.7  |
| Dcaf5    | NA   | NA   | 1.59 | 0.89 | 0    |
| Dcaf6    | NA   | 0.96 | 1.16 | 0.46 | 0    |
| Dcaf7    | NA   | 0    | 0.43 | 0    | 0    |
| Dcaf8    | NA   | 0    | 0.74 | 0    | 0    |
| Dcakd    | NA   | 0.82 | 1.19 | 3.13 | 0    |
| Dcamk1l  | 0.74 | NA   | NA   | NA   | NA   |
| Dcbld1   | 0.75 | NA   | 1.19 | 0.6  | 0    |
| Dcbld2   | 1.22 | 1.04 | 1.31 | 0    | 0    |

|         |      |      |      |      |      |
|---------|------|------|------|------|------|
| Dcc     | 0.29 | 0.43 | 0.43 | 0    | 0    |
| Dcdc2   | 0    | NA   | NA   | NA   | NA   |
| Dcdc2b  | NA   | NA   | NA   | NA   | 1.94 |
| Dchs1   | 0.1  | 1.04 | 1.48 | 1.38 | 1.15 |
| Dchs2   | NA   | NA   | NA   | 0    | NA   |
| Dci     | 0.72 | NA   | NA   | NA   | 0    |
| Dck     | 0.46 | 1.98 | 2.3  | 0    | 0    |
| Dclk1   | NA   | 0.02 | 1.06 | 0.33 | 1.21 |
| Dclk2   | NA   | 1.79 | 0.66 | 0.57 | 1.72 |
| Dclk3   | NA   | NA   | 0    | 4.32 | 0    |
| Dclre1a | 0    | 1.15 | 0.3  | 1.42 | 2.05 |
| Dclre1b | 0    | 0.91 | 1.62 | 0    | 0    |
| Dclre1c | 0    | 0.32 | 1.41 | 1.09 | 3.8  |
| Dcn     | 0.38 | 0.64 | 0.04 | 1.06 | 2.49 |
| Dcp1a   | NA   | 1.36 | 1.24 | 0    | 0.14 |
| Dcp1b   | NA   | NA   | 0.65 | 0.76 | 0    |
| Dcp2    | NA   | 0.79 | 1.08 | 1.46 | 0.7  |
| Dcps    | NA   | 0    | 0.55 | 2.03 | 1.8  |
| Dest1   | NA   | NA   | 1    | 0.6  | NA   |
| Dest2   | NA   | NA   | 0.94 | 1.13 | 5.85 |
| Dcstamp | NA   | 2.14 | 0.99 | 0.93 | NA   |
| Dct     | 0.34 | 0    | 0.5  | 0.34 | 0    |
| Dctd    | 0.25 | 1.73 | 1.96 | 2    | 7.24 |
| Dctn1   | 1    | 1.03 | 1.53 | 0    | 0.27 |
| Dctn2   | 0    | 2.84 | 1.99 | 0.01 | 0    |
| Dctn3   | 0.24 | 1.49 | 0.19 | 3.28 | 0    |
| Dctn4   | 0    | 0.9  | 0.77 | 0.93 | 0    |
| Dctn5   | 0.66 | 2.42 | 0.32 | 2.14 | 0    |
| Dctn6   | 0.78 | 0    | 0.72 | 1.8  | 0.13 |
| Dctpp1  | NA   | 0.74 | 2.35 | 1.35 | 0    |
| Dcun1d1 | NA   | 2.05 | 1.39 | 0.41 | 0    |
| Dcun1d2 | NA   | 0.91 | 2.77 | NA   | 0    |
| Dcun1d3 | NA   | NA   | 2.29 | 0.43 | 0    |
| Dcun1d4 | NA   | 1.12 | 2.37 | 0.64 | 1.85 |
| Dcun1d5 | NA   | NA   | 0.81 | 0.7  | 1.51 |
| Dex     | 0    | 0.41 | 0.53 | 2.3  | 3.35 |
| Dcxr    | 1.11 | 0.35 | 2.8  | 3.44 | 0    |
| Dda1    | NA   | 1.18 | 0.74 | 0    | 1.19 |
| Ddah1   | 0.32 | 2.3  | 0.92 | 0.83 | 1.57 |
| Ddah2   | 0    | 1.63 | 1.92 | 0.71 | 6.69 |
| Ddb1    | 0.76 | 0    | 0.95 | 0    | 2.12 |

|        |      |      |      |      |      |
|--------|------|------|------|------|------|
| Ddb2   | 0    | 0.35 | 2.67 | 1.35 | 2.5  |
| Ddc    | 1.19 | 1.14 | 0.59 | 1.12 | 1.57 |
| Ddef1  | 0.88 | NA   | NA   | NA   | NA   |
| Ddhd1  | 0.13 | NA   | 1.78 | 2.13 | 0    |
| Ddhd2  | 0    | 0    | 0.95 | 0.32 | 0    |
| Ddi1   | NA   | NA   | 0    | 2.66 | 1.29 |
| Ddi2   | NA   | 2.07 | 0.44 | NA   | 0.38 |
| Ddit3  | 0.49 | 0    | 4.84 | NA   | NA   |
| Ddit4  | 0    | 1.21 | 0.47 | 0.81 | 1.99 |
| Ddit4l | 0.04 | NA   | 0.37 | 6.57 | 0.91 |
| Ddn    | 0    | 2.13 | 1.15 | 0    | 1.69 |
| Ddo    | NA   | 1.23 | 0.72 | 9.63 | 1.15 |
| Ddost  | 0.47 | 0    | 0.51 | 1.4  | 0    |
| Ddr1   | 1.08 | 0    | 0.91 | 0.9  | 1.43 |
| Ddr2   | 0.79 | 1.05 | 1.04 | 0    | 2.33 |
| Ddrgk1 | NA   | 2.25 | 3.34 | 1.88 | 0    |
| Ddt    | 1.12 | 2.48 | 3.76 | NA   | 0    |
| Ddx1   | 0.23 | 1.76 | 1.98 | 0.49 | 0    |
| Ddx10  | 0    | 0    | 1.57 | 0.53 | 2.71 |
| Ddx11  | 1.05 | 0    | 1.32 | NA   | 1.24 |
| Ddx17  | NA   | 0.66 | 0.93 | 5.55 | 0.6  |
| Ddx18  | 0.37 | 0    | 0.24 | 1.62 | 0    |
| Ddx19a | NA   | 0    | 3.84 | 0.96 | 0    |
| Ddx19b | NA   | NA   | 0    | 0.27 | 1.13 |
| Ddx20  | 0    | NA   | 0.7  | 0.81 | 3.38 |
| Ddx21  | 0.18 | 1.91 | 1.63 | 1.51 | 1.34 |
| Ddx23  | 0    | 0.85 | 1.62 | 0.83 | 0.86 |
| Ddx24  | 0.9  | 0    | 1.45 | 3.34 | 3.32 |
| Ddx25  | 0.41 | 3.58 | 0.68 | 1.85 | 0    |
| Ddx26b | NA   | NA   | 1.13 | 0.87 | 4.31 |
| Ddx27  | 0    | 0    | 0.02 | 0.96 | 2.34 |
| Ddx28  | 0    | 0.84 | 0.14 | 4.01 | 0.94 |
| Ddx31  | 0.52 | 1.49 | 0.74 | 2.25 | 0.53 |
| Ddx39  | 0    | NA   | NA   | NA   | 0    |
| Ddx39b | NA   | 0.7  | 0.37 | NA   | NA   |
| Ddx3x  | 0.83 | 1.57 | 0.5  | 0.24 | 0    |
| Ddx3y  | 0.81 | 0.7  | 1.68 | 1.37 | 0.63 |
| Ddx4   | 0.6  | 0.62 | 3.66 | 0    | 2.85 |
| Ddx41  | 0.71 | 0    | 4.88 | 1.3  | 0    |
| Ddx42  | 1.09 | 0    | 3.11 | 0.83 | 2.39 |
| Ddx43  | NA   | 1.68 | 1.67 | NA   | 3.93 |

|         |      |      |      |      |      |
|---------|------|------|------|------|------|
| Ddx46   | 0.09 | 0    | 0.41 | 1.22 | 0    |
| Ddx47   | 0.62 | 0    | 0.32 | NA   | 9.89 |
| Ddx49   | NA   | 1.09 | 1.11 | 0.44 | 0.77 |
| Ddx5    | 0.44 | 1.82 | 1.92 | 1.06 | 0    |
| Ddx50   | 0.69 | 1.26 | 0.72 | 0.61 | 0    |
| Ddx51   | 0    | 1.39 | 0.01 | 2.39 | 6.38 |
| Ddx52   | 1.02 | 0.63 | 0.74 | 0.04 | 0.94 |
| Ddx54   | 0.49 | 0.67 | 1.07 | 1.31 | 1.14 |
| Ddx55   | 0    | NA   | 0.07 | 3.26 | 0    |
| Ddx56   | 0    | 0    | 1.44 | 0.68 | 2.47 |
| Ddx58   | 0    | 0.3  | 4.16 | 0    | 0    |
| Ddx59   | NA   | NA   | 0.35 | 3.03 | 1.45 |
| Ddx6    | 0.68 | 0    | 0.73 | 0    | 0.84 |
| Ddx60   | NA   | 1.81 | 0.57 | 0    | 1.83 |
| Deadc1  | 0.74 | NA   | NA   | NA   | NA   |
| Deaf1   | 0.94 | 0    | 2.58 | 0.66 | 0.65 |
| Decr1   | 0.05 | 3.7  | 2.21 | 1.66 | 0    |
| Decr2   | 0    | 0.66 | 1.34 | 1.39 | NA   |
| Dedd    | 0    | 1.56 | 0.41 | 0.38 | 0    |
| Dedd2   | 0    | NA   | 3.63 | 0    | 0.55 |
| Def6    | 0    | 0.94 | 1.38 | 2.43 | 2.97 |
| Def8    | NA   | 2.39 | 3.31 | 7.65 | 0    |
| Defa4   | NA   | 1.62 | 0    | NA   | 0.89 |
| Defb1   | 5.68 | 0    | 0    | 0    | 3.46 |
| Defb4   | NA   | NA   | NA   | NA   | 2.69 |
| Degs1   | NA   | 0.23 | 2.31 | 1.06 | 0    |
| Degs2   | NA   | NA   | 1.99 | 1.13 | 3.84 |
| Dek     | 1.25 | 1.2  | 0.97 | 1.06 | 0    |
| Dem1    | NA   | NA   | NA   | NA   | 1.23 |
| Dennd1a | NA   | 0.75 | 1.31 | 1.56 | 2.4  |
| Dennd1b | NA   | 1.03 | 0.47 | 2.05 | 1.47 |
| Dennd1c | NA   | 0    | 0.76 | 4.22 | 1.04 |
| Dennd2a | NA   | 0.99 | 2.61 | 1.21 | 0    |
| Dennd2c | NA   | NA   | 2.35 | 0.46 | 0.91 |
| Dennd2d | NA   | 0    | 2.12 | 0.85 | 1.23 |
| Dennd3  | NA   | 0.49 | 1.35 | 1.04 | 0.33 |
| Dennd4a | NA   | 1.47 | 0.21 | 0.75 | 0    |
| Dennd4b | NA   | 2.41 | 0.57 | 1.64 | 3.62 |
| Dennd4c | NA   | 0    | 2.73 | 1.06 | 0    |
| Dennd5a | NA   | 1.13 | 1.77 | 1.93 | 0    |
| Dennd5b | NA   | 0.18 | 0.66 | 2.05 | 0    |

|         |      |      |      |      |      |
|---------|------|------|------|------|------|
| Dennd6a | NA   | NA   | 1.9  | 0    | NA   |
| Dennd6b | NA   | 2.02 | 0.43 | 2.34 | NA   |
| Denr    | 0.83 | 0.89 | 1.78 | 2.35 | 1.89 |
| Depdc1  | 0.91 | NA   | NA   | NA   | NA   |
| Depdc1b | 0.16 | NA   | 0.81 | 0    | 0    |
| Depdc2  | 0    | NA   | NA   | NA   | NA   |
| Depdc5  | 0.64 | 0    | 1.28 | 0    | 0.31 |
| Depdc6  | NA   | NA   | NA   | NA   | 1.98 |
| Depdc7  | NA   | NA   | 4.31 | 2.06 | 1.17 |
| Deptor  | NA   | 0.43 | 1.57 | 0.56 | NA   |
| Dera    | NA   | 1.8  | 1.52 | 0.63 | 0    |
| Derl1   | NA   | 0.89 | 0.79 | 0.81 | 0    |
| Derl2   | NA   | 4.19 | 1.75 | 0    | 0.76 |
| Derl3   | NA   | NA   | 0.38 | 1.13 | 0.9  |
| Des     | 3.44 | 0.36 | 0.58 | 3.84 | 0    |
| Desi1   | NA   | 1.09 | 0.63 | 4.59 | NA   |
| Desi2   | NA   | 0.49 | 2.34 | 1.37 | NA   |
| Det1    | NA   | 0    | 0.54 | 4.79 | 1.95 |
| Dexi    | 0.36 | 0    | 4.11 | 1.33 | 0    |
| Dffa    | 0    | 0.08 | 1.9  | 0.05 | 0.41 |
| Dffb    | 0    | 0    | 0.44 | 2.25 | 0    |
| Dfna5   | NA   | 2.97 | 1.63 | 0.58 | 0    |
| Dgat1   | 1.57 | 2.06 | 0.99 | 0.2  | 0    |
| Dgat2   | 3.08 | NA   | 1.03 | 6.31 | 3.88 |
| Dgat2l6 | NA   | NA   | NA   | 1.11 | NA   |
| Dgcr14  | NA   | 1.2  | 1.09 | 0.74 | 0.52 |
| Dgcr2   | 0    | 0.93 | 1.48 | 2.16 | 0.59 |
| Dgcr6   | 0.51 | NA   | NA   | 0.88 | NA   |
| Dgcr8   | 0.29 | 0    | 0.9  | 0    | 0    |
| Dgka    | 0.27 | 0    | 2.39 | 0.34 | 0    |
| Dgkb    | 6.42 | 0.05 | 1.41 | 1.41 | 0.63 |
| Dgkd    | 0.88 | 0.04 | 2.77 | 3.73 | 0    |
| Dgke    | 2.52 | 1.67 | 1.01 | 0.07 | 0.6  |
| Dgkg    | 0.07 | 1.85 | 1.58 | 0.94 | 0    |
| Dgkh    | 1.38 | NA   | 1.86 | 3.23 | NA   |
| Dgki    | NA   | 1.79 | 1.96 | 3.93 | 0    |
| Dgkk    | NA   | NA   | NA   | 1.02 | NA   |
| Dgkq    | 1.4  | 1.51 | 0.93 | 1.47 | 0    |
| Dgkz    | 0.34 | 0    | 1.65 | 0.47 | 0    |
| Dguok   | 0.08 | 2.75 | 2.33 | 0.88 | 1.85 |
| Dher24  | 0.45 | 1.65 | 1.62 | 0    | 0    |

|        |      |      |      |      |      |
|--------|------|------|------|------|------|
| Dhcr7  | 0.14 | 2.17 | 1.5  | 0    | 1.84 |
| Dhdds  | 0    | 1.17 | 0.12 | 0.03 | 2.07 |
| Dhdh   | NA   | NA   | 0.2  | 0.98 | 0.74 |
| Dhdpsl | NA   | NA   | NA   | NA   | 0.78 |
| Dhfr   | 0.33 | 1.14 | 3.04 | NA   | 1.35 |
| Dhh    | 1.73 | NA   | 0.85 | 1.07 | NA   |
| Dhodh  | 0.12 | 1.17 | 2.49 | 1.45 | 1.59 |
| Dhps   | 3.14 | 1.12 | 1.29 | 1.66 | 0    |
| Dhrs1  | 0.27 | 3.15 | 0.92 | 0.44 | 1.07 |
| Dhrs11 | NA   | 0.41 | 0.4  | 1.35 | 0    |
| Dhrs13 | NA   | NA   | 1.46 | 0.39 | 7.07 |
| Dhrs2  | 0.97 | 1.39 | 0.81 | 0    | 0    |
| Dhrs3  | 0    | 0    | 1.3  | 0.65 | 0    |
| Dhrs4  | 0.69 | NA   | NA   | NA   | NA   |
| Dhrs7  | 0.67 | 0    | 1.16 | 1.82 | 0    |
| Dhrs7b | NA   | 2.04 | 2.02 | 0.55 | 0.71 |
| Dhrs7c | NA   | NA   | 2.18 | 2    | 0    |
| Dhrs8  | 0.18 | NA   | NA   | NA   | NA   |
| Dhrs9  | 0.13 | NA   | NA   | 0.43 | NA   |
| Dhrsx  | 0    | NA   | 0.35 | 0.44 | 0    |
| Dhtkd1 | 2.65 | 0.38 | 2.58 | 1.91 | 0    |
| Dhx15  | 0.07 | 1.72 | 2.46 | 0.47 | 1.41 |
| Dhx16  | 0    | 0    | 0.41 | 3.06 | 1.32 |
| Dhx29  | 0    | 1.09 | 1.66 | 0.91 | 2.52 |
| Dhx30  | 0.66 | 0    | 1.42 | 1.87 | 0.53 |
| Dhx32  | 0.75 | 0    | 1.41 | NA   | 0    |
| Dhx33  | 0.03 | NA   | 0.27 | 2.86 | 2.54 |
| Dhx34  | 1.98 | 1.54 | 1.99 | 2.34 | 1.1  |
| Dhx35  | 0    | 0    | 1.51 | 0.88 | 0.34 |
| Dhx36  | 0.8  | NA   | 1.51 | 1.11 | 1.29 |
| Dhx37  | 0.91 | NA   | 0.45 | 2.01 | 1.42 |
| Dhx38  | NA   | 2.02 | 0    | 2.4  | 1.05 |
| Dhx40  | 0.67 | 0.4  | 2.97 | 2.12 | 0.77 |
| Dhx57  | NA   | 0    | 2.39 | NA   | 0    |
| Dhx58  | NA   | 2.02 | 0.72 | 0.06 | 0    |
| Dhx8   | 0    | 1.82 | 0.6  | 0    | 1.29 |
| Dhx9   | 0    | 1.31 | 0.12 | 0.04 | 0    |
| Diablo | 0.12 | 1.64 | 0    | NA   | 2.3  |
| Dicer1 | 1.2  | 1.51 | 1.21 | 1.57 | 0.55 |
| Dido1  | 0    | 0    | 0.64 | 0.65 | 0    |
| Diexf  | NA   | 0    | 0.01 | 1.19 | NA   |

|        |      |      |      |      |       |
|--------|------|------|------|------|-------|
| Dimt1  | NA   | 0.66 | 3.65 | 1.13 | NA    |
| Dio1   | 0.55 | 4.01 | 0.78 | 0.69 | 4.92  |
| Dio2   | 0    | 0    | 1.16 | 2.81 | 1.8   |
| Dio3   | 1.29 | NA   | NA   | 0    | NA    |
| Dio3os | NA   | NA   | 2.11 | NA   | 0     |
| Dip2a  | NA   | 0.92 | 1.29 | 1.16 | NA    |
| Dip2b  | NA   | NA   | 0.75 | 0    | 0     |
| Dip2c  | NA   | 2.66 | 0.64 | 0    | 2.7   |
| Diras1 | 0.28 | NA   | 0.91 | 1.59 | 2.55  |
| Diras2 | 1.27 | 2.25 | 1.19 | 3.83 | 1.26  |
| Dirc2  | 3.54 | NA   | 0.84 | 0    | 0     |
| Dis3   | NA   | 1.04 | 2.54 | 0.94 | 1     |
| Dis3l  | NA   | NA   | 0    | 0.75 | 0     |
| Dis3l2 | NA   | NA   | 0.74 | 0    | 1.3   |
| Disc1  | 0    | NA   | NA   | NA   | NA    |
| Disp1  | 0    | NA   | 0.58 | 0.57 | 1.34  |
| Disp2  | 1.12 | NA   | 1.99 | 0.82 | 0.24  |
| Dixdc1 | 0.65 | 0.45 | 0.02 | 0.74 | 0     |
| Dkc1   | NA   | 0.75 | 0.26 | 1.29 | 0     |
| Dkk1   | 1.36 | 0    | 0.42 | 0.83 | 2.33  |
| Dkk2   | 0.14 | 0.71 | 1.74 | 1.87 | 3.31  |
| Dkk3   | 0.69 | 0.85 | 0.08 | 0.94 | 1.79  |
| Dkk4   | 2.56 | 2.87 | 1.12 | 0.86 | 16.22 |
| Dkk1l  | NA   | 2.2  | 0.78 | 3.09 | 7.16  |
| Dlat   | 0.43 | 0    | 0.51 | 1.03 | 0     |
| Dlc1   | 0.62 | 0.01 | 0.76 | 1.03 | 2.82  |
| Dld    | 1.08 | 0.1  | 1.71 | 0    | 1.16  |
| Dlec1  | NA   | NA   | NA   | 1.61 | NA    |
| Dleu2  | 4.56 | 0    | 5.4  | 1.76 | 2.05  |
| Dleu7  | NA   | NA   | 0.92 | 1.41 | 2.16  |
| Dlg1   | NA   | 0.03 | 0.71 | 2.35 | 3.07  |
| Dlg2   | NA   | 1.25 | 0.99 | 0.92 | 0     |
| Dlg3   | NA   | 0.32 | 1.81 | 0.3  | 0.34  |
| Dlg4   | NA   | 1.85 | 0.38 | 0.11 | 2.2   |
| Dlg5   | 1.62 | 0.01 | 0.41 | 1.29 | 0.8   |
| Dlg7   | 0.22 | NA   | NA   | NA   | NA    |
| Dlgap1 | 0.59 | 0.89 | 0.64 | 0.92 | 1.14  |
| Dlgap2 | 1.62 | 0.5  | 1.12 | 1.16 | 0     |
| Dlgap3 | 0    | NA   | 0.07 | 0.78 | 0     |
| Dlgap4 | 0.24 | 1.58 | 2.51 | 1.65 | 0     |
| Dlgap5 | NA   | 1.48 | 4.61 | 2.68 | 0.73  |



|         |      |      |      |      |       |
|---------|------|------|------|------|-------|
| Dlk1    | 0.53 | 1.15 | 0    | 1.49 | 0     |
| Dlk2    | NA   | 0.91 | 2.42 | 0.79 | 1.57  |
| Dll1    | 0    | NA   | 4.43 | 0    | 2.59  |
| Dll3    | 1.89 | 2.44 | 0.74 | 0.56 | 0     |
| Dll4    | 1.6  | NA   | 0.18 | 1.01 | 2.04  |
| Dlst    | 0.61 | 0    | 1.56 | 0.79 | NA    |
| Dlx1    | 1.62 | NA   | 3.89 | 0.78 | 0     |
| Dlx2    | 0    | 0.07 | 3.29 | 0.96 | 8.1   |
| Dlx3    | 0.25 | NA   | 1.94 | 1.2  | 0.78  |
| Dlx4    | 1.4  | 0.05 | 0.7  | 0.57 | 1.73  |
| Dlx5    | 0    | 0.84 | 0.9  | 1.47 | 4.86  |
| Dlx6    | NA   | 2.41 | 0.66 | 0.36 | 0     |
| Dlx6as  | NA   | NA   | NA   | NA   | 0     |
| Dmap1   | 0    | NA   | 2.31 | 0    | 4.55  |
| Dmbt1   | 0.62 | 2.85 | 1.7  | 1.49 | 3.13  |
| Dmbx1   | NA   | NA   | 2.77 | 0.59 | 2.41  |
| Dmc1    | NA   | 0.49 | 1.29 | 0.19 | 1.46  |
| Dmd     | 0.19 | 0.35 | 0    | 0    | 2.69  |
| Dmgdh   | 0    | NA   | 1.01 | 3.01 | 1.04  |
| Dmkn    | NA   | NA   | 0    | 3.63 | 0     |
| Dmn     | 0.27 | NA   | NA   | NA   | NA    |
| Dmp1    | 0.48 | 0.85 | 0.67 | 6.81 | 1.13  |
| Dmpk    | NA   | 1.24 | 2.14 | 1.23 | 0     |
| Dmrt1   | 2.56 | 2.25 | 0    | 2.06 | 0     |
| Dmrt2   | 0.04 | NA   | 0.5  | 0.56 | 11.76 |
| Dmrt3   | 7.67 | NA   | 0.59 | 1.03 | 0     |
| Dmrta1  | 1.91 | NA   | 2.01 | 0    | 0     |
| Dmrta2  | 2.51 | NA   | 0.86 | 0.69 | NA    |
| Dmrta3  | 0.09 | NA   | 0.4  | 0    | 0     |
| Dmrta1b | NA   | NA   | NA   | 0    | NA    |
| Dmrta2  | NA   | NA   | 1.9  | 1.5  | 0     |
| Dmtf1   | 0    | 0.37 | 0.76 | 0.72 | 4.02  |
| Dmtn    | NA   | 0    | 0.35 | 0.98 | NA    |
| Dmwd    | 0.44 | 0.67 | 2.22 | 0.83 | 0     |
| Dmxl1   | NA   | 0.14 | 2.41 | 0.86 | 0     |
| Dmxl2   | NA   | 0.95 | 1.99 | 2.9  | 0     |
| Dna2    | NA   | 0.24 | 3.96 | 1.4  | 3.15  |
| Dna2l   | 0    | NA   | NA   | NA   | NA    |
| Dnaaf1  | NA   | 0.78 | 1.44 | 0.38 | NA    |
| Dnaaf2  | NA   | 0.11 | 1.3  | 1.26 | NA    |
| Dnaaf3  | NA   | NA   | NA   | 0.39 | NA    |

|         |      |      |      |       |      |
|---------|------|------|------|-------|------|
| Dnah1   | NA   | NA   | 0.09 | 0.13  | NA   |
| Dnah10  | NA   | NA   | NA   | 0.48  | NA   |
| Dnah11  | NA   | NA   | 1.84 | NA    | NA   |
| Dnah12  | NA   | NA   | 4.16 | 0     | NA   |
| Dnah17  | NA   | 0.15 | 4.99 | 0     | NA   |
| Dnah2   | NA   | 0.98 | 0.69 | 2.63  | NA   |
| Dnah3   | NA   | NA   | NA   | 0.1   | NA   |
| Dnah5   | NA   | NA   | 1.73 | 0     | NA   |
| Dnah6   | NA   | 0.11 | 1.2  | 0.13  | NA   |
| Dnah8   | NA   | NA   | 0.11 | 1.56  | NA   |
| Dnah9   | NA   | 0.55 | 0.71 | 1.44  | NA   |
| Dnai2   | 3.48 | NA   | NA   | NA    | NA   |
| Dnaja1  | 0.61 | 3.09 | 1.42 | 0.02  | 0    |
| Dnaja2  | 0    | 0.56 | 1.48 | 0.83  | 1.94 |
| Dnaja3  | 0    | 0    | 0.83 | 0.82  | 1.49 |
| Dnaja4  | 0.66 | 3.62 | 0.98 | 1.23  | 2.14 |
| Dnajb1  | 0.54 | 1.85 | 0.63 | 0     | 0    |
| Dnajb11 | 0    | NA   | 0.75 | 0.42  | 2.58 |
| Dnajb12 | 0    | 0.86 | 1.21 | 0     | 0    |
| Dnajb13 | NA   | NA   | 0.95 | 0.25  | 1.47 |
| Dnajb14 | NA   | 0.31 | 1.56 | 0     | 2.82 |
| Dnajb2  | NA   | 1.21 | 1.59 | 0     | 0    |
| Dnajb3  | NA   | NA   | NA   | 1.58  | NA   |
| Dnajb4  | 0    | 1.35 | 1.1  | 1.57  | 1.2  |
| Dnajb5  | 0.35 | 0.29 | 0.31 | 11.38 | 0.07 |
| Dnajb6  | 0.25 | 2.73 | 1.08 | 0     | 0    |
| Dnajb7  | 0.43 | NA   | 0    | 2.73  | NA   |
| Dnajb8  | 0    | NA   | 0    | NA    | 2.53 |
| Dnajb9  | 0.32 | 1.07 | 2.7  | 0.29  | 1.81 |
| Dnajc1  | 0.23 | 0    | 1.87 | 1.29  | 0.29 |
| Dnajc10 | 0.23 | 0.53 | 2.28 | 3.24  | NA   |
| Dnajc11 | 0    | 0    | 0    | NA    | 0.93 |
| Dnajc12 | 0.75 | 0.99 | 0.52 | 2.08  | 2.76 |
| Dnajc13 | 0.71 | 0.64 | 0.16 | 0     | 1.42 |
| Dnajc14 | 0.6  | NA   | 2.78 | 2.91  | 0    |
| Dnajc15 | NA   | 0.93 | 1.68 | 0.71  | 0.05 |
| Dnajc16 | NA   | 0.56 | 0.43 | 2.51  | 0.47 |
| Dnajc17 | NA   | 0.64 | 0.46 | NA    | 2.78 |
| Dnajc18 | NA   | NA   | 0.63 | 0.62  | 0.66 |
| Dnajc19 | NA   | NA   | 1.42 | 0.72  | 0    |
| Dnajc2  | NA   | 1.38 | 0.65 | 1.97  | 3.43 |

|          |      |      |      |      |       |
|----------|------|------|------|------|-------|
| Dnajc21  | NA   | NA   | 1.16 | 0.47 | 0     |
| Dnajc22  | NA   | 1.18 | 0.74 | 1.53 | 1.44  |
| Dnajc24  | NA   | 2.17 | 2.63 | 0.9  | 0     |
| Dnajc25  | NA   | NA   | 3.01 | NA   | 1.7   |
| Dnajc27  | NA   | NA   | 0.48 | 1.13 | 0.59  |
| Dnajc28  | NA   | 1.78 | 4.44 | 1.3  | 1.18  |
| Dnajc3   | 8.56 | 0    | 2.72 | 0    | 1.4   |
| Dnajc30  | NA   | NA   | 0.81 | 2.66 | 1.62  |
| Dnajc4   | 0    | 1.2  | 1.27 | 0.61 | 0     |
| Dnajc5   | 0.85 | NA   | 0.74 | 0    | 0     |
| Dnajc5b  | 1.18 | NA   | 0.42 | 3.3  | 0     |
| Dnajc5g  | NA   | NA   | 0.57 | 8.68 | NA    |
| Dnajc6   | 0.37 | 0.74 | 0.45 | NA   | 0     |
| Dnajc7   | 0.65 | 2.1  | 2.33 | 0.25 | 2.41  |
| Dnajc8   | 0.09 | 0.9  | 3.8  | 0.77 | 2.18  |
| Dnajc9   | 1.35 | 1.45 | 2.01 | 0.63 | 0     |
| Dnal1    | NA   | NA   | 0.74 | 0.39 | NA    |
| Dnal4    | NA   | 0.78 | 2.78 | 0.19 | NA    |
| Dnali1   | 1.72 | 0.4  | 0.38 | 0.85 | 0     |
| Dnase1   | 0    | 3.06 | 0.13 | 1.11 | 2.8   |
| Dnase111 | 0.62 | 3.05 | 2.31 | NA   | 0     |
| Dnase112 | 0.79 | 2.85 | 1.64 | 2.97 | 1.17  |
| Dnase113 | 0.12 | 0.02 | 0.92 | 4.32 | 2.43  |
| Dnase2b  | 0.39 | 1.24 | 5.19 | 0    | 1.92  |
| Dncl2a   | 1.99 | NA   | NA   | NA   | NA    |
| Dnd1     | 4.16 | 0    | 0.98 | 0.69 | 0     |
| Dner     | 0.53 | NA   | 0.27 | 0.34 | 1.11  |
| Dnhd1    | NA   | NA   | 0.9  | NA   | 5.42  |
| Dnlz     | NA   | NA   | 4.51 | 1.5  | 0     |
| Dnm1     | NA   | 1.21 | 1.97 | 0    | 0.55  |
| Dnm11    | 0.14 | 1.62 | 1.16 | 0.61 | 0     |
| Dnm2     | 0.17 | 0.28 | 0.8  | NA   | 0     |
| Dnm3     | 2.07 | 1.56 | 0.76 | 0.95 | 1.26  |
| Dnm3os   | NA   | NA   | 0.46 | NA   | NA    |
| Dnmbp    | 0.58 | 0    | 1.21 | 1.08 | 0     |
| Dnmt1    | 0.11 | 0    | 1.73 | 0    | 0     |
| Dnmt3a   | 0    | 0.24 | 0.27 | 0    | 0.68  |
| Dnmt3b   | 0    | 1.16 | 0.79 | 2.68 | 1.54  |
| Dnmt3l   | 1    | 1.32 | 1.27 | 1.44 | 13.12 |
| Dnpep    | 0    | 0.6  | 0.79 | 1.48 | 0     |
| Dnph1    | NA   | 0.55 | 1.96 | 1.78 | NA    |

|         |      |      |      |      |      |
|---------|------|------|------|------|------|
| Dntt    | 1.32 | 0.6  | 0.51 | 1.3  | 1.99 |
| Dnttip1 | 0.62 | NA   | 1.03 | 0.96 | 2.44 |
| Dnttip2 | NA   | 0    | 3.62 | 0.02 | 0.6  |
| Doc2a   | 1.14 | 1.78 | 0.73 | NA   | 0    |
| Doc2b   | 1.18 | 1.31 | 0.9  | 0    | 0    |
| Dock1   | 1.29 | 0.94 | 0.89 | 0.81 | 3.18 |
| Dock10  | 0.97 | 0    | 1.58 | 0.52 | 0    |
| Dock11  | 0.04 | NA   | 0.76 | 0.07 | 2.48 |
| Dock2   | 0.49 | 0    | 0.97 | 0    | 1.04 |
| Dock3   | 1.56 | 1.59 | 1.16 | 0    | 0    |
| Dock4   | 0.71 | 0    | 2.33 | 0.4  | 1.34 |
| Dock5   | 0    | 0.29 | 2    | 1.78 | 0.84 |
| Dock6   | NA   | 0.49 | 0.42 | 0.53 | 2.88 |
| Dock7   | 3.48 | NA   | 0.96 | 0    | 0    |
| Dock8   | 0.51 | NA   | 0.95 | 1.11 | 0    |
| Dock9   | 2.28 | 0.43 | 0.84 | 0    | 0    |
| Dohh    | NA   | 2.03 | 2.41 | 1.24 | 0    |
| Dok1    | 0.99 | 1.06 | 0.14 | 2.4  | 1.34 |
| Dok2    | NA   | 0.92 | 0.79 | 0.88 | 2.9  |
| Dok3    | 0.56 | 0    | 1.89 | 2.45 | 2.92 |
| Dok4    | 5.28 | 1.02 | 0.23 | 0.28 | 0    |
| Dok5    | 1.1  | 1.32 | 2.28 | 1.02 | 0    |
| Dok6    | NA   | NA   | NA   | 4.62 | NA   |
| Dok7    | NA   | NA   | 0.12 | 4.41 | 0    |
| Dolk    | NA   | 1.39 | 0.24 | 3.19 | 1.43 |
| Dolpp1  | 0    | 0    | 0.99 | 0    | 2.53 |
| Dom3z   | 0.3  | 0.37 | 0.8  | 1.22 | 0.8  |
| Donson  | 0.07 | 1.74 | 2.45 | 1.04 | NA   |
| Dopey1  | NA   | 0    | 0.9  | 1.84 | 0    |
| Dopey2  | NA   | 0.75 | 0.94 | 0.14 | 0.98 |
| Dot11   | 0    | 1.5  | 1.31 | 1.44 | 0    |
| Dpagt1  | 0.2  | 3.56 | 0.25 | 6.95 | 0    |
| Dpcd    | NA   | NA   | 0.49 | 0    | NA   |
| Dpcr1   | NA   | NA   | NA   | 0    | NA   |
| Dpep1   | 4.57 | 1.16 | 0.58 | 7.57 | 0    |
| Dpep2   | 0.23 | NA   | NA   | 0.2  | NA   |
| Dpep3   | 1.2  | 2.09 | 4.56 | 2.04 | 4.43 |
| Dpf1    | NA   | 1.75 | 1.7  | 1.7  | 0    |
| Dpf2    | 1.22 | 0    | 2.01 | 0.71 | 0    |
| Dpf3    | 0.88 | 0.02 | 0    | 0.91 | 1.37 |
| Dph2    | NA   | 0.05 | 1.82 | 1.82 | 2.87 |

|         |      |      |      |      |       |
|---------|------|------|------|------|-------|
| Dph3    | NA   | NA   | 1.4  | 1.04 | 2.6   |
| Dph5    | NA   | 1.01 | 3.49 | 0.98 | 2.18  |
| Dpm1    | 0.05 | 1.61 | 3.01 | 0.88 | 0     |
| Dpm2    | 0.55 | 2.55 | 1.92 | 0.81 | 1.77  |
| Dpm3    | 0.48 | 2.92 | 2.55 | 0    | 0     |
| Dpp10   | 0.83 | NA   | 1.02 | 0.63 | 2.15  |
| Dpp3    | 0.41 | 0.88 | 0.9  | 0    | 4.12  |
| Dpp4    | 4.79 | 0    | 0.76 | 2.62 | 2.61  |
| Dpp6    | 0.38 | 0    | 0.11 | 1.14 | 0     |
| Dpp7    | 0.09 | NA   | 0.44 | 0    | 0     |
| Dpp8    | 0.71 | 1.2  | 0.95 | 0.48 | 1.74  |
| Dpp9    | 0    | NA   | 0    | 0.11 | 0.96  |
| Dppa2   | 0    | NA   | 0.88 | 0.52 | 1.5   |
| Dppa3   | 3.16 | NA   | 0.97 | 3.25 | 12.78 |
| Dppa4   | 0.74 | 3.72 | 1.3  | 2.19 | 1.24  |
| Dppa5   | 2.38 | NA   | NA   | NA   | NA    |
| Dpt     | 0.94 | 1.39 | 1.57 | 0.82 | 0     |
| Dpy1911 | NA   | 0.71 | 0    | 3.91 | 0     |
| Dpy1912 | NA   | NA   | 1.75 | 0.67 | 0     |
| Dpy1913 | NA   | NA   | 0.21 | 0    | 0     |
| Dpy1914 | NA   | 0.87 | 2.14 | 0.67 | 0     |
| Dpy30   | NA   | 1.79 | 1.06 | 0    | 0     |
| Dpyd    | 3.18 | 1.14 | 0.69 | 0    | 0.33  |
| Dpys    | 3.31 | 1.52 | 0.36 | 0    | 1.41  |
| Dpysl2  | 0    | 0    | 1.93 | 0.08 | 0     |
| Dpysl3  | 0.76 | 0.72 | 1.01 | 0    | 1.35  |
| Dpysl4  | 0.17 | 0.78 | 0.92 | 0    | 0     |
| Dpysl5  | NA   | NA   | 0.73 | 0    | 8.06  |
| Dqx1    | 0.61 | NA   | 1.63 | 0    | 0     |
| Dr1     | 0    | 1.16 | 1.14 | 5.6  | 1.5   |
| Dram1   | NA   | 0    | 0.85 | 1.27 | 0     |
| Dram2   | NA   | NA   | 2.12 | 2.17 | 1.92  |
| Drap1   | 0.83 | 2.09 | 0.6  | 0.13 | 1.79  |
| Draxin  | NA   | NA   | 0.91 | 0.52 | NA    |
| Drc1    | NA   | NA   | 0    | 2.35 | NA    |
| Drd1lip | 1.91 | NA   | NA   | NA   | NA    |
| Drd2    | 0.52 | 1.08 | 1.24 | 0.6  | 10.39 |
| Drd3    | 0    | 1.07 | 0.48 | 0.19 | 0     |
| Drd4    | 0.4  | 2.88 | 0.02 | 1.44 | 0     |
| Drd5    | 0    | NA   | NA   | 0.41 | NA    |
| Drg1    | 0.34 | 0.07 | 0.99 | 1.16 | 0.04  |

|         |      |      |      |      |      |
|---------|------|------|------|------|------|
| Drg2    | 0.05 | 1.61 | 0.1  | 1.08 | 0    |
| Drosha  | NA   | NA   | NA   | 2.89 | NA   |
| Drp2    | 3.36 | 0.81 | 0.29 | 0    | 0    |
| Dsc1    | 0    | 2.43 | 0.74 | 4.2  | 9.53 |
| Dsc2    | 0    | 1.16 | 1.91 | 1.63 | 0    |
| Dsc3    | 4.36 | 0.64 | 2.1  | 0.89 | 0.23 |
| Dscam   | 2.32 | 0.5  | 0    | 0.66 | 0    |
| Dscaml1 | 0    | NA   | 0.36 | 1.08 | 0    |
| Dscc1   | NA   | 0    | 0.63 | 0.65 | 2.38 |
| Dscr1   | 0.62 | NA   | NA   | NA   | NA   |
| Dscr111 | 0    | NA   | NA   | NA   | NA   |
| Dscr112 | 2.45 | NA   | NA   | NA   | NA   |
| Dscr2   | 0.01 | NA   | NA   | NA   | NA   |
| Dscr3   | 0    | 0    | 3.14 | 1.09 | 0    |
| Dscr6   | 2.4  | NA   | NA   | NA   | NA   |
| Dse     | NA   | 0.06 | 1.3  | 0.53 | 2.95 |
| Dsel    | NA   | NA   | 1.66 | 0.37 | 0.03 |
| Dsg2    | 0    | 1.66 | 0.93 | 0.24 | 1.16 |
| Dsg3    | 1.89 | NA   | NA   | 0.75 | NA   |
| Dsg4    | 0.49 | NA   | NA   | 1.34 | NA   |
| Dsn1    | NA   | 1.14 | 3.3  | 0.68 | 4.99 |
| Dsp     | 0.4  | 0    | 0.01 | 0    | 0.99 |
| Dspp    | 0    | 0.28 | 0.93 | 0.1  | 1.18 |
| Dst     | 0.15 | 0.47 | 1.23 | 4.12 | 0    |
| Dstn    | 0.5  | 1.84 | 2.3  | 1.2  | 3.48 |
| Dstyk   | NA   | 0.92 | 2.26 | 0    | 0    |
| Dtd1    | NA   | NA   | 1.25 | 1.62 | NA   |
| Dtd2    | NA   | NA   | 1.45 | 0.72 | NA   |
| Dtl     | NA   | 0    | 1.37 | 0.68 | 0    |
| Dtna    | 1.51 | 0.55 | 0    | 2.03 | 1.43 |
| Dtnb    | 1.66 | 1.93 | 0.88 | 5.62 | 0.38 |
| Dtnbp1  | 0.55 | NA   | 1.32 | 0.44 | 0    |
| Dtwd1   | NA   | 1.53 | 3.08 | 1.37 | 0    |
| Dtwd2   | NA   | NA   | 2.1  | 8.37 | 2.19 |
| Dtx1    | 0.15 | NA   | 0.02 | 0.59 | 0.6  |
| Dtx2    | 0    | 1.23 | 2.34 | 4.32 | 8.43 |
| Dtx3    | 0.02 | 1.38 | 0.94 | 3.53 | NA   |
| Dtx3l   | NA   | NA   | 4.09 | 0    | 0    |
| Dtx4    | 0.1  | 2.93 | 0.84 | 2.21 | 3.71 |
| Dtymk   | 0.08 | 1.27 | 1.42 | 0    | 0.48 |
| Dullard | 0    | NA   | NA   | NA   | NA   |

|        |      |      |      |      |      |
|--------|------|------|------|------|------|
| Duox1  | 0.91 | 1.23 | 2.79 | 3.3  | 0    |
| Duox2  | 0.1  | NA   | NA   | 0    | NA   |
| Duoxa1 | NA   | NA   | 0.48 | NA   | NA   |
| Duoxa2 | NA   | NA   | 1.3  | 0    | 3.42 |
| Dupd1  | NA   | NA   | NA   | 0.54 | NA   |
| Dus11  | NA   | 2.71 | 1.98 | 1.49 | 0    |
| Dus21  | NA   | 1.09 | 0.78 | NA   | 0    |
| Dus31  | NA   | NA   | 1.33 | 1.49 | 1.78 |
| Dus41  | NA   | 0    | 0.91 | 0.39 | 0    |
| Dusp1  | 0    | 1.02 | 2.33 | 0    | 0    |
| Dusp10 | 0    | 1.62 | 0.8  | 0    | 0.72 |
| Dusp11 | 0.24 | 1.25 | 1.43 | 0    | 1.25 |
| Dusp12 | 0    | 0.83 | 0.82 | 1.93 | 0    |
| Dusp13 | 0.98 | 0    | 8.43 | 0.65 | 0    |
| Dusp14 | 0    | 0    | 0    | 0.21 | 1.23 |
| Dusp15 | 0.34 | NA   | 1.48 | 1.07 | 0    |
| Dusp16 | 0.01 | NA   | 0.68 | 0    | 0.89 |
| Dusp18 | 0    | NA   | 1.94 | NA   | 0    |
| Dusp19 | 1.05 | NA   | 0.41 | 0.76 | NA   |
| Dusp2  | 0.43 | 2.17 | 1.12 | 2.39 | 2.42 |
| Dusp21 | NA   | 0.53 | 1.08 | 0.44 | 3.57 |
| Dusp22 | 4.63 | 3.42 | 2.71 | 1.29 | 3.75 |
| Dusp23 | 0    | NA   | 2.59 | 0.34 | 2.52 |
| Dusp26 | NA   | 2.76 | 2.73 | 0.94 | 0    |
| Dusp27 | NA   | NA   | 0.49 | 0.95 | 3.06 |
| Dusp28 | NA   | NA   | 1.3  | 0.97 | 0    |
| Dusp3  | 0.38 | 2.97 | 1.49 | 1.06 | 2.22 |
| Dusp4  | 0    | 1.19 | 2    | 2.19 | 0    |
| Dusp5  | NA   | 2.46 | 1.85 | 1.34 | 0    |
| Dusp6  | 1.4  | 1.88 | 0.39 | 0    | 0    |
| Dusp7  | 0.58 | 0    | 3.01 | 2.78 | 0    |
| Dusp8  | 4.2  | 1.63 | 1.24 | 2.69 | 1.42 |
| Dusp9  | 1.38 | 1.34 | 1.46 | 3.32 | 0    |
| Dut    | NA   | 1.17 | 1.01 | 0.65 | 2.29 |
| Dvl1   | 1.54 | 0    | 1.22 | 1.21 | 2.19 |
| Dvl2   | 0    | 0    | 0.79 | 1.29 | 0    |
| Dvl3   | 0.88 | 1.44 | 1.03 | 1.02 | 0    |
| Dvwa   | NA   | NA   | NA   | NA   | 0.22 |
| Dydc1  | NA   | NA   | 2.29 | 0.54 | NA   |
| Dydc2  | NA   | NA   | 2.72 | NA   | 4.52 |
| Dym    | NA   | 1.16 | 1.32 | 0    | 1.39 |

|          |       |      |      |      |       |
|----------|-------|------|------|------|-------|
| Dync1h1  | NA    | 0    | 0.55 | 0    | 0.33  |
| Dync1i1  | NA    | 2.52 | 1.55 | 0.46 | 0     |
| Dync1i2  | NA    | 0.21 | 3.11 | 0.17 | 1.5   |
| Dync1li1 | NA    | 0.97 | 1.45 | 0.57 | 6.55  |
| Dync1li2 | NA    | 0.55 | 1.19 | 0    | 0     |
| Dync2h1  | NA    | 2.7  | 1.32 | 0.4  | 0     |
| Dync2li1 | NA    | 0    | 1.4  | 4.32 | NA    |
| Dynll1   | NA    | 1.39 | 1.85 | 1.36 | 0     |
| Dynll2   | NA    | NA   | 1.03 | 0.71 | 2.19  |
| Dynlrb1  | NA    | 0.98 | 1.41 | 0.15 | 1.63  |
| Dynlrb2  | NA    | NA   | 0.2  | 1.63 | 0     |
| Dynlt3   | NA    | 2    | 2.69 | 1.07 | 2.78  |
| Dyrk1a   | 0     | 0.4  | 0.3  | 1.22 | 0     |
| Dyrk1b   | 0     | 0    | 1.91 | 0.25 | 2.98  |
| Dyrk2    | NA    | 0    | 1.03 | 1.82 | NA    |
| Dyrk3    | 0     | 1.36 | 0.04 | 3.34 | 0     |
| Dyrk4    | 0     | NA   | NA   | 0.94 | NA    |
| Dysf     | 3.48  | 0    | 0.49 | 1.96 | 7.33  |
| Dyx1c1   | 1.08  | NA   | 0.01 | 1.66 | 0     |
| Dzank1   | NA    | 4.1  | 0.34 | 0.84 | NA    |
| Dzip1    | NA    | 1.04 | 0.54 | 0    | 0.73  |
| Dzip1l   | NA    | NA   | 4.2  | 1.64 | 0     |
| Dzip3    | NA    | 0    | 0.62 | 0.78 | 0     |
| E2f1     | 0.37  | 0.96 | 2.47 | 6.48 | 2.24  |
| E2f2     | 0.25  | 1.38 | 2.38 | 1.63 | 2.5   |
| E2f3     | 0.27  | 0    | 1.36 | 2.12 | 0     |
| E2f4     | NA    | 0.1  | 0.14 | 2.63 | 3.63  |
| E2f5     | 0     | 0.26 | 1.31 | 0.48 | 0     |
| E2f6     | 0     | 0.79 | 1.37 | 0.6  | 1.04  |
| E2f7     | 1.65  | NA   | 1.81 | 0.24 | 1.32  |
| E2f8     | NA    | 0.08 | 0.8  | 1.26 | 0.81  |
| E4f1     | 0     | 0.13 | 2.53 | 1.38 | 22.35 |
| Eaf1     | 0     | NA   | 2.21 | 0    | 0.52  |
| Eaf2     | 1.36  | 2.57 | 0.91 | 1.52 | 2.59  |
| Eapp     | NA    | 0.1  | 0.85 | 0.76 | 2.73  |
| Ears2    | NA    | NA   | 0.02 | 1.92 | 0     |
| Ebag9    | 0.23  | 2.34 | 0.21 | 0.93 | 7.46  |
| Ebf1     | 1.17  | NA   | 0.96 | 0    | 0.59  |
| Ebf2     | 0.83  | 2.17 | 0.27 | 0.9  | 0     |
| Ebf3     | 10.44 | NA   | 0.09 | 0.81 | 1.19  |
| Ebf4     | NA    | NA   | 0.41 | 3.35 | 2.42  |



|          |      |      |      |      |      |
|----------|------|------|------|------|------|
| Ebi2     | 1.13 | NA   | NA   | NA   | NA   |
| Ebi3     | 0.36 | 0.48 | 4.13 | 1.83 | 0    |
| Ebna1bp2 | 0.09 | 1.22 | 0.67 | NA   | 2.42 |
| Ebp      | 0.12 | 1.52 | 2.22 | 0.94 | 0    |
| Ebpl     | 0.35 | NA   | 0.24 | 1.98 | 4.76 |
| Ecd      | NA   | 0.57 | 0.83 | 0.44 | 0.33 |
| Ece1     | 0.02 | 1.78 | 0.97 | 5.9  | 4.19 |
| Ece2     | 0.93 | 0.32 | 0    | 2.19 | 1.92 |
| Ecel1    | 0.36 | 1.37 | 1.49 | 1.32 | 0    |
| Ecgf1    | 1.58 | NA   | NA   | NA   | NA   |
| Ech1     | 0.2  | 1.18 | 0.39 | 4.12 | 6.8  |
| Echdc1   | 0.17 | 0.65 | 1.63 | 1.6  | 0    |
| Echdc2   | NA   | 0    | 1.21 | 0.7  | 1.43 |
| Echdc3   | 6.45 | 2.39 | 2.29 | 1.2  | 0.77 |
| Echs1    | 0.43 | 2.84 | 3.12 | 0.35 | 0    |
| Eci1     | NA   | 1.74 | 1.62 | 0.72 | NA   |
| Eci2     | NA   | 2.17 | 1.35 | NA   | NA   |
| Ecm1     | 1.51 | 2.84 | 1.62 | 1.49 | 3.48 |
| Ecm2     | NA   | 0.32 | 1.08 | 0.06 | 3.44 |
| Ecsr     | NA   | NA   | 2.49 | NA   | 0    |
| Ecsit    | NA   | 0.92 | 2.16 | 0.74 | 0    |
| Ect2     | 0.54 | 0    | 2.05 | 0    | 4.11 |
| Eda      | 0.3  | 0    | 0.27 | 0.33 | 2.55 |
| Eda2r    | 1.94 | 2.42 | 3.28 | 1.05 | 1.82 |
| Edar     | 0    | 0    | 0.94 | 0.3  | 1.4  |
| Edaradd  | 0.24 | NA   | 0    | 2.44 | NA   |
| Edc3     | NA   | 2.35 | 4.49 | 0    | 1.94 |
| Edc4     | NA   | 0    | 2.73 | 0    | 5.5  |
| Eddm3b   | NA   | NA   | NA   | 0.25 | NA   |
| Edem1    | 0.48 | 0    | 2.26 | 0.55 | 3.22 |
| Edem2    | NA   | 1.37 | 0.26 | 3.77 | 0    |
| Edem3    | NA   | 1.28 | 0.45 | 0.17 | 0.43 |
| Edf1     | 1.64 | 2.37 | 0.65 | 0.33 | 2.76 |
| Edg1     | 0    | NA   | NA   | NA   | NA   |
| Edg2     | 1.05 | NA   | NA   | NA   | NA   |
| Edg3     | 0.11 | NA   | NA   | NA   | NA   |
| Edg4     | 0    | NA   | NA   | NA   | NA   |
| Edg5     | 1.45 | NA   | NA   | NA   | NA   |
| Edg6     | 3.72 | NA   | NA   | NA   | NA   |
| Edg7     | 8.28 | NA   | NA   | NA   | NA   |
| Edg8     | 3.73 | NA   | NA   | NA   | NA   |

|         |      |      |      |       |       |
|---------|------|------|------|-------|-------|
| Edil3   | 0    | 0.5  | 1.56 | 8.35  | 0     |
| Edn1    | 0.25 | 0.31 | 2.33 | 0.82  | 0     |
| Edn2    | 0.82 | 1.83 | 0.11 | 3.6   | 1.6   |
| Edn3    | 0.95 | 1.05 | 2.19 | 1.6   | 0     |
| Ednra   | 0.07 | 0.32 | 0.41 | 1.24  | 0     |
| Ednrb   | 0.7  | 3.59 | 0.02 | 0.29  | 2.03  |
| Eea1    | 0.62 | 1    | 2.9  | 1.63  | 2.65  |
| Eed     | 0.82 | 0    | 0.33 | 2.98  | 2.5   |
| Eef1a1  | 0.76 | 1.65 | 1.65 | 3.64  | 6.13  |
| Eef1a2  | 1.06 | 0.83 | 1    | 1.84  | 2.24  |
| Eef1b2  | 0.25 | 0.72 | 5.01 | 0.13  | 0     |
| Eef1d   | 0.96 | 0.7  | 0    | 0.18  | 0.21  |
| Eef1e1  | 0.32 | 0.9  | 2.14 | 0.7   | 0     |
| Eef1g   | NA   | 0    | 0.77 | 1.09  | NA    |
| Eef2    | 0.43 | 0    | 0.95 | 1.13  | 0     |
| Eef2k   | 0    | NA   | 1.15 | 0     | 0     |
| Eefsec  | 0.53 | NA   | 1.96 | 0     | 0     |
| Eepd1   | NA   | NA   | 0    | 2.78  | 0.71  |
| Efcab1  | NA   | 1.03 | 0.83 | 1.69  | 1.69  |
| Efcab10 | NA   | NA   | 0    | 0.35  | NA    |
| Efcab11 | NA   | 0    | 1.16 | 0.83  | NA    |
| Efcab12 | NA   | NA   | 3.26 | 0.17  | NA    |
| Efcab14 | NA   | 0    | 0.91 | 0.52  | NA    |
| Efcab2  | NA   | 1.8  | 0    | 0.71  | 0     |
| Efcab3  | NA   | NA   | 1.57 | 4.79  | NA    |
| Efcab4a | NA   | NA   | 0.61 | 0.35  | 3.5   |
| Efcab4b | NA   | NA   | NA   | 2.62  | NA    |
| Efcab5  | NA   | NA   | NA   | 2.66  | NA    |
| Efcab6  | NA   | 2.19 | 0.83 | 3.07  | 18.06 |
| Efcab7  | NA   | NA   | 0.02 | 2.18  | 0.92  |
| Efcbp1  | 0    | NA   | NA   | NA    | NA    |
| Efcbp2  | 0.49 | NA   | NA   | NA    | NA    |
| Efcc1   | NA   | 1.71 | 0.45 | 1.43  | NA    |
| Efemp1  | 0.96 | 0.73 | 2.54 | 1.2   | 1.36  |
| Efemp2  | 0    | 0    | 0.48 | 0.03  | 0.93  |
| Efha1   | NA   | NA   | NA   | NA    | 0     |
| Efha2   | NA   | NA   | NA   | NA    | 1.02  |
| Efhb    | NA   | NA   | 1.75 | 2.03  | 1.54  |
| Efhc1   | 1.04 | 0    | 0.41 | 14.64 | 0     |
| Efhc2   | 0    | 1.2  | 1.21 | 1.47  | 0     |
| Efhd1   | 0    | 2.19 | 0.45 | 2.31  | 2.69  |

|         |      |      |      |       |      |
|---------|------|------|------|-------|------|
| Efhd2   | 0.04 | 3.23 | 1.39 | 5.8   | 0    |
| Efna1   | 0.95 | 0.47 | 2.53 | 0.8   | 0    |
| Efna2   | 1.4  | 1.15 | 0.71 | 0.57  | 0    |
| Efna3   | 2.63 | 0.79 | 0.57 | 0.31  | 0    |
| Efna4   | 0.59 | 1.61 | 1.33 | 4.27  | 3.75 |
| Efna5   | 0    | 1.07 | 0.15 | 1.14  | 1.61 |
| Efnb1   | 0    | 0.71 | 0.44 | 2.42  | 2.85 |
| Efnb2   | 1.14 | 1.2  | 0.02 | 1.08  | 1.63 |
| Efnb3   | 1.8  | 1.54 | 0.31 | 1.51  | 2.08 |
| Efr3a   | NA   | 1.78 | 1.41 | 1.42  | 0    |
| Efr3b   | NA   | 0.9  | 1.11 | 0     | 1.32 |
| Efs     | 4.54 | 0.09 | 1.83 | 1.47  | 0    |
| Eftud1  | 3.51 | 1.39 | 0.54 | 0.56  | 3.43 |
| Eftud2  | NA   | NA   | 0.62 | 0.78  | 0    |
| Egf     | 1.66 | 1.27 | 10.5 | 1.8   | 4.24 |
| Egfl6   | 2.19 | 0.42 | 0.92 | 1.08  | 0    |
| Egfl7   | 0.06 | 1.46 | 0    | 0.68  | 0    |
| Egfl8   | 0.25 | 1.17 | 1.98 | NA    | NA   |
| Egfl9   | 2.78 | NA   | NA   | NA    | NA   |
| Egflam  | NA   | NA   | 0.04 | 1.28  | 2.34 |
| Egfr    | 0.14 | 0.66 | 1.01 | 11.85 | 0    |
| Egln1   | 0.43 | 1.84 | 1.3  | 0.18  | 0.32 |
| Egln2   | 0.88 | 2.58 | 0.43 | 1.6   | 0.05 |
| Egln3   | 0.38 | 1.15 | 1.08 | 0     | 0    |
| Egr1    | 0    | 1.46 | 3.41 | 0.25  | 4.16 |
| Egr2    | 0.64 | 1.44 | 1.54 | 0     | 0    |
| Egr3    | 0.84 | 1.05 | 0.77 | 0.53  | 0    |
| Egr4    | 1.27 | 2.22 | 0    | 1     | 0    |
| Ehbp1   | 0    | 0.04 | 0.65 | 1.65  | 1.12 |
| Ehbp111 | NA   | 0.32 | 5.15 | 3.34  | 7.36 |
| Ehd1    | 0.22 | 0.59 | 1.87 | 3.01  | 0    |
| Ehd2    | 0    | 0.32 | 1.62 | 0     | 1.33 |
| Ehd3    | 0.2  | 0.3  | 2.68 | 0     | 2.13 |
| Ehd4    | 0.85 | 0    | 0.42 | 0.73  | 1.78 |
| Ehf     | 0.03 | 0.22 | 0    | 2.06  | 0    |
| Ehhadh  | 0.88 | 2.37 | 2.15 | 2.57  | 0.35 |
| Ehmt1   | 0.71 | 1.22 | 2.02 | 2.81  | 0    |
| Ehmt2   | NA   | 0.02 | 1.27 | 0.57  | 0.12 |
| Ei24    | 0.1  | 0    | 2.53 | 1.09  | 0    |
| Eid1    | NA   | 0.86 | 2.51 | 2.68  | 0    |
| Eid2    | NA   | NA   | 1.5  | 1     | 2.01 |

|         |      |      |      |      |       |
|---------|------|------|------|------|-------|
| Eid2b   | NA   | NA   | NA   | 0.17 | NA    |
| Eid3    | NA   | NA   | 0.57 | 0.95 | 4.85  |
| Eif1    | NA   | 0.38 | 1.92 | 0    | 0.84  |
| Eif1ad  | NA   | NA   | 2.83 | 1.29 | 1.03  |
| Eif1ax  | NA   | 1.44 | 1.6  | 0.84 | 0     |
| Eif1ay  | 1.21 | NA   | NA   | NA   | NA    |
| Eif1b   | NA   | 1.61 | 0.13 | 0.87 | 3.21  |
| Eif2a   | NA   | NA   | 2.17 | 1.05 | 0     |
| Eif2ak1 | 0    | 1.35 | 0.89 | 0.78 | 0.5   |
| Eif2ak2 | NA   | 0.44 | 0.43 | 0    | 0     |
| Eif2ak3 | 0.67 | 0    | 1.55 | 0    | 0.64  |
| Eif2ak4 | 0.5  | NA   | 0.82 | 1.06 | 0.91  |
| Eif2b1  | 0.45 | 0    | 1.48 | 0.89 | 30.78 |
| Eif2b2  | 1.85 | 0    | 2.12 | 1.21 | 0     |
| Eif2b3  | 0.13 | 1.28 | 0.27 | 1.05 | 0.83  |
| Eif2b4  | 0    | 0.66 | 0    | 1.69 | 0     |
| Eif2b5  | 0    | 0    | 1.32 | 0.24 | 4.51  |
| Eif2c1  | 0    | NA   | NA   | NA   | 0     |
| Eif2c2  | 1.13 | NA   | NA   | NA   | 0     |
| Eif2c3  | 0    | NA   | NA   | NA   | 1.52  |
| Eif2c4  | 0.68 | NA   | NA   | NA   | 0.33  |
| Eif2d   | NA   | 0    | 0.98 | 0    | NA    |
| Eif2s1  | 0.53 | 0.62 | 0.67 | 0    | 1.75  |
| Eif2s2  | 0.13 | 0.79 | 1.72 | 0    | 0.62  |
| Eif3a   | NA   | 2.01 | 0.36 | 0    | 0     |
| Eif3b   | NA   | 1.72 | 1.21 | 0.06 | 1.82  |
| Eif3c   | NA   | NA   | 1.98 | NA   | 0     |
| Eif3d   | NA   | 1    | 1.9  | 0    | 0     |
| Eif3e   | NA   | 1.05 | 2.53 | 2.38 | 3.99  |
| Eif3f   | NA   | 0.14 | 1.02 | 0    | 0.01  |
| Eif3g   | NA   | 2.3  | 0.68 | 1.38 | 0     |
| Eif3h   | NA   | 0    | 0.88 | 0    | 3.06  |
| Eif3i   | NA   | 1.84 | 0.52 | 1.87 | 0     |
| Eif3j   | NA   | NA   | NA   | NA   | 0     |
| Eif3k   | NA   | 0    | 1.37 | 0    | 0     |
| Eif3l   | NA   | 1.3  | 0.3  | 0.85 | 0     |
| Eif3m   | NA   | 0.76 | 0.32 | 0.85 | 0     |
| Eif3s1  | 0.2  | NA   | NA   | NA   | NA    |
| Eif3s10 | 0.21 | NA   | NA   | NA   | NA    |
| Eif3s2  | 0    | NA   | NA   | NA   | NA    |
| Eif3s3  | 0.13 | NA   | NA   | NA   | NA    |

|           |      |      |      |      |      |
|-----------|------|------|------|------|------|
| Eif3s4    | 0    | NA   | NA   | NA   | NA   |
| Eif3s5    | 0.19 | NA   | NA   | NA   | NA   |
| Eif3s6    | 0.87 | NA   | NA   | NA   | NA   |
| Eif3s6ip  | 0.18 | NA   | NA   | NA   | NA   |
| Eif3s7    | 0.91 | NA   | NA   | NA   | NA   |
| Eif3s9    | 0.14 | NA   | NA   | NA   | NA   |
| Eif4a1    | 0.37 | 2.1  | 0.47 | 1.12 | 0    |
| Eif4a2    | 0    | 0    | 2.6  | 1.08 | 0    |
| Eif4a3    | NA   | 0.69 | 0.86 | 1.53 | 0    |
| Eif4b     | 0.01 | 0    | 1.42 | 0    | 0    |
| Eif4e     | 0.29 | 0.64 | 1.38 | 2.21 | 2.01 |
| Eif4e1b   | NA   | NA   | NA   | 1.58 | NA   |
| Eif4e2    | NA   | 0.51 | 1.66 | 0.9  | 0    |
| Eif4e3    | NA   | NA   | 1.68 | 0.93 | 0    |
| Eif4ebp1  | 1.77 | 0.98 | 0.41 | 0.19 | 0    |
| Eif4ebp2  | 0.57 | 0.42 | 1.28 | 2.97 | 0.7  |
| Eif4ebp3  | 0.18 | NA   | NA   | NA   | NA   |
| Eif4enif1 | 0.77 | 0.96 | 1.93 | 1.68 | 1.25 |
| Eif4g1    | 0.1  | 0    | 0.06 | 1.83 | 1.59 |
| Eif4g2    | 0.29 | 0.35 | 0.24 | 0    | 0.76 |
| Eif4g3    | 1.29 | 0.77 | 0.74 | 1.24 | 0    |
| Eif4h     | NA   | 1.45 | 0.76 | 0.04 | 0    |
| Eif5      | 0    | 1.29 | 1.75 | 0.36 | 0    |
| Eif5a     | 0.4  | 1.62 | 0.38 | 1.4  | 1.17 |
| Eif5a2    | 1.75 | 3.09 | 2.25 | 1.42 | 1.39 |
| Eif5b     | 0.1  | 0.65 | 0.06 | 0.95 | 0    |
| Eif6      | NA   | 1.25 | 2.13 | 0    | 0.12 |
| Ela1      | 2.18 | NA   | NA   | NA   | NA   |
| Ela2      | 0    | NA   | NA   | NA   | NA   |
| Ela3b     | 0.65 | NA   | NA   | NA   | NA   |
| Elac1     | 0    | 1.14 | 1.55 | 0    | 1.11 |
| Elac2     | 0.1  | 0.59 | 0.93 | 2.58 | 0.71 |
| Elane     | NA   | 0    | 1.09 | 0.83 | 0.65 |
| Elavl1    | 0    | 0    | 0.03 | 0    | 0    |
| Elavl2    | 1.19 | 0.35 | 0.84 | 0.72 | 1.74 |
| Elavl3    | 0.57 | 2.14 | 0.03 | 1.83 | 2.03 |
| Elavl4    | 0.71 | 1.5  | 1.58 | 1.41 | 0.82 |
| Elf1      | 0.7  | 1.08 | 0.87 | 1.36 | 0.28 |
| Elf2      | 0    | 0.53 | 0.49 | 0.25 | 0    |
| Elf3      | 0.62 | 0.89 | 1.36 | 0.74 | 3.81 |
| Elf4      | 0.54 | 1.2  | 0.02 | 0.99 | 0    |

|         |      |      |      |      |       |
|---------|------|------|------|------|-------|
| Elf5    | 0.85 | 0.54 | 2.04 | 0.46 | 0     |
| Elfn1   | NA   | NA   | 0.79 | 0.42 | 14.36 |
| Elfn2   | NA   | NA   | 2.51 | 0    | NA    |
| Elk1    | 0    | 0.75 | 0.55 | 3.29 | 0     |
| Elk3    | 0.2  | 0.03 | 4.92 | NA   | 0     |
| Elk4    | 0.96 | 0.82 | 0.37 | 0    | 1.91  |
| El1     | 0.83 | 0.81 | 1.68 | 3.24 | 0     |
| El12    | 0    | 0.71 | 1.23 | 0.15 | 1.33  |
| El13    | 0.78 | NA   | NA   | 0.43 | NA    |
| Elmo1   | 0.32 | 0    | 1.8  | 1.18 | 0     |
| Elmo2   | 0.81 | 0.28 | 0.64 | 0.52 | 4.25  |
| Elmo3   | 0.56 | 3.54 | 1.55 | 1.06 | 0     |
| Elmod1  | NA   | NA   | 2.95 | 2.17 | 2.61  |
| Elmod2  | 2.4  | NA   | 0.84 | 0.39 | 0     |
| Elmod3  | NA   | NA   | 2.89 | 0.56 | NA    |
| Elmsan1 | NA   | NA   | 0.33 | 0.62 | NA    |
| Eln     | 1.65 | 0.91 | 0.21 | 1.12 | 3.31  |
| Elof1   | NA   | NA   | 5.49 | 3.16 | 0     |
| Elovl1  | 0.03 | 1.41 | 1.46 | 5.41 | 3.08  |
| Elovl2  | 0.08 | 1.78 | 2.29 | 0.87 | 1.43  |
| Elovl3  | 0.2  | NA   | 1.19 | 3.46 | 1.18  |
| Elovl4  | 6.29 | 0    | 1.89 | 0.71 | 1.92  |
| Elovl5  | 0.98 | 1.03 | 1.02 | 0.16 | 0.99  |
| Elovl6  | 1.34 | 0.87 | 1.42 | 0.28 | 2.45  |
| Elovl7  | 2.55 | NA   | 0.86 | 0.72 | 0.2   |
| Elp2    | NA   | NA   | 0.5  | 0    | 3.32  |
| Elp3    | 0.21 | 0    | 0.38 | 0.5  | 1.88  |
| Elp4    | 0    | 0.96 | 1.02 | 0.73 | 1.05  |
| Elp5    | NA   | 1.86 | 0    | 0.92 | NA    |
| Elp6    | NA   | 0    | 0.33 | 0.85 | NA    |
| Elt1    | NA   | 1.78 | 0.05 | 2.46 | 1.79  |
| Emb     | 0.87 | NA   | 0.01 | 1.2  | 0     |
| Emc1    | NA   | 0    | 0.55 | 0    | NA    |
| Emc10   | NA   | NA   | 0.55 | 0.23 | NA    |
| Emc2    | NA   | 0    | 1.27 | 1.06 | NA    |
| Emc3    | NA   | 0.79 | 1.42 | 0    | NA    |
| Emc4    | NA   | NA   | 3.97 | 0.65 | NA    |
| Emc6    | NA   | 1.33 | 1.47 | 1.03 | NA    |
| Emc7    | NA   | 0.74 | 1.61 | 0.73 | NA    |
| Emc8    | NA   | 0.94 | 1.23 | 2.23 | NA    |
| Emc9    | NA   | 2.2  | 1.39 | 1.57 | NA    |

|         |      |      |      |      |      |
|---------|------|------|------|------|------|
| Emcn    | 1.8  | 0.75 | 0.92 | 2.32 | 2.01 |
| Emd     | 0.82 | 3.8  | 2.67 | 0.95 | 0    |
| Eme1    | NA   | NA   | 0.73 | 0.95 | 0    |
| Eme2    | 2.18 | NA   | 1    | 0.25 | NA   |
| Emg1    | NA   | 0.06 | 1.49 | NA   | 2.01 |
| Emid1   | 0.32 | 2.58 | 0    | 1.83 | 1.58 |
| Emid2   | NA   | NA   | NA   | NA   | 1.59 |
| Emilin1 | 0.17 | 1.74 | 1.79 | 0.89 | 0    |
| Emilin2 | 0.74 | 0    | 1.57 | 0.95 | 0.74 |
| Emilin3 | 2.43 | NA   | 1.38 | 0.65 | 0    |
| Eml1    | 0    | 2.24 | 1.04 | 3.73 | NA   |
| Eml2    | 0.48 | 0.72 | 2.6  | 0    | 0    |
| Eml3    | NA   | 0.15 | 1.61 | 2.16 | 0    |
| Eml4    | 2.12 | 0    | 1.34 | 1.47 | 0.51 |
| Eml5    | 0.51 | NA   | 0.76 | 2    | 1.31 |
| Eml6    | NA   | NA   | 1.29 | 0.27 | 0.7  |
| Emp1    | 0.06 | 0    | 0    | 0.78 | 1.59 |
| Emp2    | 0.58 | 0.67 | 1.46 | 0    | 0    |
| Emp3    | 0.27 | 3.41 | 0.48 | 0    | 0.39 |
| Emr1    | 0    | 4.37 | 3.39 | 1.2  | 3.36 |
| Emr4    | 0.78 | NA   | NA   | NA   | NA   |
| Emx1    | 0    | 1.96 | 2.21 | 0.09 | 0    |
| Emx2    | 1.71 | 0.03 | 2.1  | 0    | 2.33 |
| Emx2os  | NA   | NA   | 0    | NA   | 0    |
| En1     | 0.7  | 1.91 | 0    | 1.28 | 0    |
| En2     | 0.22 | 1.48 | 0.6  | 2.4  | 4.54 |
| Enah    | 0.27 | 0.88 | 0.9  | 1.61 | 0    |
| Enam    | 0    | NA   | 1.4  | 1.13 | 0.7  |
| Enc1    | 0    | 1.22 | 7.49 | 0.96 | 0.04 |
| Endod1  | NA   | 0.93 | 0.55 | 0    | 0.61 |
| Endog   | 0    | 0.11 | 0.8  | NA   | 0    |
| Endogl1 | 0.06 | NA   | NA   | NA   | NA   |
| Endou   | NA   | 1.4  | 1.05 | 1.92 | NA   |
| Endov   | NA   | NA   | 1.13 | 1.71 | NA   |
| Eng     | 1.3  | 0.75 | 0.48 | 1.49 | 0.89 |
| Engase  | NA   | 0    | 1.63 | 1.21 | 0    |
| Enho    | NA   | NA   | 0.87 | 0.92 | 0    |
| Enkd1   | NA   | NA   | 0.48 | 1.45 | NA   |
| Enkur   | NA   | NA   | 3.55 | 3.31 | 0    |
| Eno1    | 0.33 | 1    | 0    | 0    | 0.42 |
| Eno2    | 0.49 | 3.63 | 0    | 0.4  | 0    |

|        |      |      |      |      |      |
|--------|------|------|------|------|------|
| Eno3   | 0    | 1.07 | 0    | 2.14 | 1.98 |
| Eno4   | NA   | NA   | NA   | 0.9  | NA   |
| Enoph1 | NA   | 3.06 | 1.83 | 0.14 | 0    |
| Enox1  | NA   | 0.82 | 0.58 | 0    | 0    |
| Enox2  | NA   | 0    | 1.55 | 1.18 | 0    |
| Enpep  | 0    | 2.09 | 0.29 | 1.03 | 1.44 |
| Enpp1  | 0.3  | 2.17 | 2.88 | 1.5  | 0.26 |
| Enpp2  | 0.76 | 0    | 1.16 | 0    | 1.63 |
| Enpp3  | 0    | 1.02 | 0.46 | 0.87 | 0.17 |
| Enpp4  | 1.3  | 0.54 | 0.4  | 0.06 | 2.49 |
| Enpp5  | 1.34 | NA   | 0.25 | 1.86 | 2.02 |
| Enpp6  | 0.9  | NA   | 2.49 | 0.99 | 0.17 |
| Enpp7  | NA   | NA   | NA   | 1.32 | NA   |
| Ensa   | 0.74 | 0    | 0.89 | 0.42 | 0    |
| Enthd1 | NA   | NA   | 2.21 | 0.8  | NA   |
| Enthd2 | NA   | NA   | 1.54 | 1.26 | NA   |
| Entpd1 | 0.72 | 0.01 | 2.86 | 1.21 | 0    |
| Entpd2 | 1.35 | 2.53 | 1.71 | 0.37 | 2.94 |
| Entpd3 | 1.03 | 3.93 | 2.7  | 4.02 | 2.24 |
| Entpd4 | 0.85 | 0.46 | 3.09 | 3.78 | 0    |
| Entpd5 | 0.79 | 0.03 | 0.98 | 1.36 | 0    |
| Entpd6 | 0.82 | 0    | 0.98 | 0.75 | 0.1  |
| Entpd7 | 1.31 | 0    | 0.21 | 0    | 2.49 |
| Entpd8 | 1.38 | NA   | NA   | 1.01 | NA   |
| Eny2   | NA   | 0    | 0    | 0    | 1.55 |
| Eogt   | NA   | 1.14 | 1.42 | 0.27 | NA   |
| Eomes  | 0.39 | NA   | 0.74 | 1.95 | 0    |
| Ep300  | 0.89 | 1.76 | 1.81 | 1.42 | 0    |
| Ep400  | 0.4  | 0    | 1.08 | 1.52 | 0.92 |
| Epas1  | 0    | 0.7  | 1.16 | 0    | 2.21 |
| Epc1   | 0.84 | NA   | 0.7  | 0    | 1.43 |
| Epc2   | 1.09 | NA   | 1.73 | 0.81 | 2.88 |
| Epcam  | NA   | 1.02 | 0.43 | 0.52 | 2.38 |
| Epdr1  | NA   | NA   | 3.55 | 0.85 | 1.31 |
| Epg5   | NA   | NA   | NA   | 0    | NA   |
| Epgn   | 2.09 | NA   | NA   | 0.45 | NA   |
| Epha1  | 1.25 | 0    | 0.49 | 0.6  | 0.91 |
| Epha10 | NA   | NA   | 1.99 | 0.61 | 0    |
| Epha2  | 0    | 1.96 | 0    | 0    | 0    |
| Epha3  | 0.65 | 0.58 | 0.39 | 1.55 | 1.78 |
| Epha4  | 0.61 | 1.44 | 0.66 | 0.36 | 0    |



|          |      |      |      |       |      |
|----------|------|------|------|-------|------|
| Epha5    | 0.24 | 1.12 | 0.52 | 0.64  | 0    |
| Epha6    | 0.7  | NA   | 2.6  | 0.06  | 3.76 |
| Epha7    | 0.83 | 0.01 | 0.34 | 0     | 1.79 |
| Epha8    | 0.65 | NA   | 0    | 0.52  | 2.58 |
| Ephb1    | 0.72 | 0    | 0    | 2.48  | 1.44 |
| Ephb2    | 0.52 | 0.3  | 0.54 | 0     | 0    |
| Ephb3    | 0    | 0.93 | 2.38 | 0.68  | 2.82 |
| Ephb4    | 0.95 | 1.52 | 1.17 | 1.89  | 5.33 |
| Ephb6    | 0.9  | 0    | 3.55 | 0.94  | 0    |
| Ephx1    | 0    | 0.21 | 0.22 | 0.51  | 0.87 |
| Ephx2    | 3.41 | 0    | 0.81 | 0.77  | 0.76 |
| Ephx3    | NA   | 1.32 | 3.42 | 1.11  | 0.98 |
| Ephx4    | NA   | NA   | 0.25 | 2.05  | NA   |
| Epm2a    | 0    | 0.04 | 2.53 | 1.56  | 1    |
| Epm2aip1 | 8.63 | 1.3  | 1.19 | 0.83  | 0.52 |
| Epn1     | 0    | 2.23 | 0.96 | 0.2   | 1    |
| Epn2     | 0    | 0.55 | 0.85 | 7.87  | 0.75 |
| Epn3     | 1.02 | 0.63 | 1.1  | 1.74  | 0    |
| Epo      | 0.74 | NA   | NA   | 1.96  | NA   |
| Epor     | 1.03 | 0    | 0.55 | 1.54  | 0.79 |
| Eppb9    | 0    | NA   | NA   | NA    | NA   |
| Eppin    | NA   | 1.92 | 1.7  | 0.79  | NA   |
| Eppk1    | 0    | 1.54 | 0.15 | 0.68  | 0    |
| Eprs     | 2.38 | 0    | 0.99 | 0     | 3.01 |
| Eps15    | 0    | 0.18 | 2.6  | 1.06  | 2.98 |
| Eps15l1  | NA   | 0.55 | 0.9  | 0.04  | 0    |
| Eps8     | 0    | 1.3  | 5.04 | 1.13  | 0    |
| Eps8l1   | 0.31 | 1.45 | 0    | 0.57  | 0    |
| Eps8l2   | 0.91 | 3.94 | 0.72 | NA    | 2.31 |
| Eps8l3   | 2.98 | 1.47 | 0.97 | NA    | 0.64 |
| Epsti1   | NA   | NA   | 0    | 10.64 | 0.43 |
| Ept1     | NA   | NA   | 0.64 | NA    | NA   |
| Epx      | 0.38 | 1.09 | 1.29 | 0.49  | 0    |
| Epyc     | NA   | 2.06 | 1.02 | 0.39  | 2.09 |
| Eqtn     | NA   | NA   | 0.34 | 0     | NA   |
| Eraf     | 3.47 | NA   | NA   | NA    | NA   |
| Eral1    | 0    | 0.21 | 0.79 | 0.64  | 0.44 |
| Erap1    | NA   | 0.53 | 1.61 | 3.9   | 1.93 |
| Eras     | 0.31 | NA   | NA   | 1.54  | NA   |
| Erbb2    | 0.77 | 0    | 2.16 | 0     | 0    |
| Erbb2ip  | 0.91 | 1.09 | 1.22 | 1     | 3.37 |

|       |      |      |      |      |      |
|-------|------|------|------|------|------|
| Erb3  | 0.01 | 0.77 | 1.6  | 1.4  | 1    |
| Erb4  | 1.3  | 2    | 0    | 0    | 6.13 |
| Erc1  | NA   | 0.99 | 0.27 | 0.51 | 0.26 |
| Erc2  | NA   | 0.73 | 0.81 | 0.86 | 1.44 |
| Erc3  | 0    | 1.02 | 1.33 | NA   | 0    |
| Erc4  | 0.8  | 0    | 1.96 | 1.84 | 1.55 |
| Erc5  | 2.17 | 1.08 | 1.26 | 0.8  | 3.14 |
| Erc6  | 0.12 | 0.35 | 0.61 | 0.44 | 0    |
| Erc7  | 0    | 0    | 1.54 | 2.06 | 2.16 |
| Erc8  | 0.18 | NA   | NA   | NA   | 0    |
| Erc9  | NA   | 0.41 | 1.57 | 1.17 | 0    |
| Erc10 | NA   | NA   | 0.42 | 0.37 | NA   |
| Erc11 | NA   | 1.12 | 0    | 1.38 | 0.44 |
| Erc12 | 0    | 0.47 | 0.17 | 0.31 | 1.95 |
| Erc13 | 0    | 0    | 0.14 | 1.12 | 0.73 |
| Erc14 | 0.18 | 0    | 0.59 | 0.92 | 0    |
| Erc15 | NA   | NA   | 1.98 | 0    | 1.1  |
| Erc16 | NA   | 0    | 0.51 | 0.04 | 0    |
| Erc17 | NA   | 0.33 | 0.26 | 0.89 | 1.83 |
| Erc18 | 0    | 0.56 | 1.49 | 0    | 0    |
| Erc19 | NA   | NA   | 0    | 0.38 | 0    |
| Erc20 | NA   | 1.62 | 0.77 | 0.37 | 0.17 |
| Erc21 | NA   | 1.79 | 2.61 | 0.08 | 1.13 |
| Erc22 | NA   | NA   | NA   | 1.43 | NA   |
| Erc23 | NA   | NA   | 2.35 | 1.08 | 0    |
| Erc24 | NA   | 0    | 2.02 | 1.1  | 3.94 |
| Erc25 | NA   | 1.03 | 1.38 | 0.46 | 0    |
| Erc26 | 0.16 | 1.28 | 3.29 | 2.33 | 0    |
| Erc27 | NA   | NA   | 0.92 | 0.07 | 0    |
| Erc28 | NA   | 0    | 0.23 | 0    | 0    |
| Erc29 | 0.31 | 0.6  | 0.65 | 0.86 | 0    |
| Erc30 | 0    | 2.25 | 1.29 | 0.14 | 5.24 |
| Erc31 | 0    | 0    | 2.86 | 1.39 | 1.7  |
| Erc32 | NA   | 2.62 | 0.58 | 0.67 | 0.69 |
| Erc33 | NA   | NA   | 0.14 | 2.01 | 1.71 |
| Erc34 | NA   | 0.8  | 0.36 | 0.9  | 0    |
| Erc35 | NA   | 0.78 | 2.04 | 0.94 | 0.18 |
| Erc36 | NA   | NA   | 1.98 | 0.25 | 0.23 |
| Erc37 | NA   | NA   | 0.95 | 0.36 | 0    |
| Erc38 | NA   | NA   | 1.3  | 0    | 0    |
| Erc39 | NA   | NA   | 1.75 | 0.35 | 1.15 |

|       |      |      |      |      |      |
|-------|------|------|------|------|------|
| Esd   | 0.93 | 0.57 | 3.02 | 4.22 | 0.92 |
| Esf1  | NA   | 1.66 | 5.07 | 2.52 | 2.03 |
| Esm1  | 0.85 | 0.18 | 0.33 | 1.19 | 1.49 |
| Espl1 | 0.37 | 2.38 | 2.41 | 1.83 | 1.81 |
| Espn  | 0    | 0.27 | 1.26 | 1.49 | 0    |
| Espnl | NA   | NA   | NA   | 1.09 | NA   |
| Esr1  | 0.99 | 0.19 | 1.62 | 0.11 | 1    |
| Esr2  | 0    | 0.99 | 0.49 | 0    | 0    |
| Esrp1 | NA   | 0.74 | 0.57 | 2.7  | 0.76 |
| Esrp2 | NA   | 1.61 | 0.26 | 0.61 | 2.12 |
| Esrra | 0.7  | 1.05 | 0.66 | 1.94 | 0.99 |
| Esrrb | 0.44 | 1.45 | 0.44 | 5.27 | 0    |
| Esrrg | 0.74 | 0.64 | 0.21 | 0.59 | 0    |
| Esx1  | 4.33 | NA   | 2.46 | 1.93 | NA   |
| Esyt1 | NA   | 0    | 0    | 1.31 | 0    |
| Esyt2 | NA   | NA   | 1.96 | 0    | 2.26 |
| Esyt3 | NA   | NA   | 2.52 | 4.09 | 1.82 |
| Etaa1 | NA   | 2.9  | 1.95 | 0.6  | 0    |
| Etf1  | 0.6  | 0.25 | 1.52 | 0.9  | 0    |
| Etfā  | 0    | 2.69 | 2.21 | 1.93 | 0    |
| Etfb  | 0.36 | 0.89 | 1.59 | 0.04 | 2.33 |
| Etfdh | 1.59 | 0.54 | 0.51 | 1.75 | 0.03 |
| Ethe1 | 1.51 | 0    | 1.12 | 0    | 0    |
| Etnk1 | 0.06 | 1.49 | 0.45 | 0    | 0    |
| Etnk2 | 0.55 | 0.34 | 1.43 | 1.02 | 0    |
| Ets1  | 0    | 0.51 | 1.93 | 1.99 | 0.71 |
| Ets2  | 0.18 | 0.22 | 1.15 | 5.52 | 0    |
| Etv1  | 1.23 | 0.76 | 0.63 | 0.89 | 2.16 |
| Etv2  | NA   | 3.52 | 1.96 | 2.24 | 0    |
| Etv3  | 0.37 | 0.66 | 3.57 | 0.6  | 1.17 |
| Etv3l | NA   | NA   | NA   | 0    | NA   |
| Etv4  | 3.05 | 0    | 0    | 3.48 | 4.61 |
| Etv5  | 0.76 | 0.57 | 1.75 | 1.71 | 2.44 |
| Etv6  | 0.79 | 0.17 | 0.1  | 0.38 | 0.44 |
| Eva1  | 1.07 | NA   | NA   | NA   | NA   |
| Eva1a | NA   | NA   | 2.86 | 1.22 | NA   |
| Eva1b | NA   | 1.35 | 2.76 | NA   | NA   |
| Eva1c | NA   | NA   | 0    | 2.18 | NA   |
| Evc   | 0.63 | 1.3  | 0.78 | 5.08 | 0    |
| Evc2  | 2.1  | NA   | 1.34 | 2.5  | 3.57 |
| Evi1  | 0    | NA   | NA   | NA   | NA   |

|         |      |      |      |      |      |
|---------|------|------|------|------|------|
| Evi2a   | 0.05 | 0    | 1.77 | NA   | 0    |
| Evi2b   | 3.27 | 1.09 | 1.61 | NA   | 3.02 |
| Evi5    | 0    | 0.85 | 1.48 | 1.08 | 2.49 |
| Evi5l   | NA   | NA   | 2.74 | 0    | 0    |
| Evl     | 1.06 | 0    | 0.08 | 2.04 | 0    |
| Evpl    | 2.33 | 0.63 | 0.96 | 1.26 | 5.44 |
| Evx1    | 2.55 | 0.79 | 1.47 | 0.54 | 0.53 |
| Evx2    | 0.55 | NA   | NA   | 1.33 | NA   |
| Ewsr1   | NA   | 0.68 | 1.18 | 2.29 | 0.89 |
| Exd1    | NA   | NA   | 0.83 | 0.96 | NA   |
| Exd2    | NA   | 0    | 0.36 | 0.78 | 1.42 |
| Exo1    | 0    | 0.45 | 1.41 | 1.15 | 0.09 |
| Exo5    | NA   | 2    | 1.17 | 0.96 | NA   |
| Exoc1   | NA   | 0.55 | 0.68 | 0.22 | 1.22 |
| Exoc2   | NA   | 0.17 | 2.31 | 0.78 | 4.39 |
| Exoc3   | NA   | 0.75 | 1.54 | NA   | 1.68 |
| Exoc3l2 | NA   | NA   | 1.29 | NA   | NA   |
| Exoc3l4 | NA   | NA   | 1.77 | NA   | NA   |
| Exoc4   | NA   | NA   | 1.93 | 0.5  | 0.66 |
| Exoc5   | NA   | 1.1  | 1.02 | 0.28 | 1.39 |
| Exoc6   | NA   | NA   | 0.58 | 0.11 | 0    |
| Exoc6b  | NA   | 0.21 | 1.14 | 0.76 | 0.76 |
| Exoc7   | 1.52 | 1.36 | 1.11 | 0    | 0.15 |
| Exoc8   | 1.04 | NA   | 0.3  | 0    | 2.73 |
| Exog    | NA   | 0.14 | 1.49 | 0.94 | 1.18 |
| Exosc1  | 1.88 | 0.91 | 1.67 | 0.5  | 0    |
| Exosc10 | 0.32 | 0    | 0.76 | 2.88 | 0    |
| Exosc2  | 0.24 | 0.6  | 1.19 | 1.3  | 1.66 |
| Exosc3  | 0    | NA   | 2.61 | 0.28 | 0    |
| Exosc4  | 0.52 | 0    | 0.48 | 1.68 | 4.19 |
| Exosc5  | 0.23 | 0.78 | 0.23 | 2.78 | 0.01 |
| Exosc6  | 0    | NA   | 1.17 | NA   | 2.19 |
| Exosc7  | 1.14 | 1.09 | 0.39 | 2.65 | 2.27 |
| Exosc8  | 0.43 | 0    | 0.88 | 0.98 | 0    |
| Exosc9  | 3.16 | 1.93 | 2.93 | 0.42 | 0.7  |
| Exph5   | NA   | 0    | 0.38 | 0.73 | 2.43 |
| Ext1    | 0.33 | 0    | 0.15 | 1.48 | 0    |
| Ext2    | 0.79 | 0    | 0.63 | 0    | 2.81 |
| Extl1   | 0    | 2.84 | 0.73 | 0.18 | 2.64 |
| Extl2   | 0.26 | 1.69 | 0.76 | 0.03 | 2.85 |
| Extl3   | 1.1  | 1.72 | 0.53 | 1.67 | 1.44 |

|        |      |      |      |      |       |
|--------|------|------|------|------|-------|
| Eya1   | 0.43 | 1.27 | 1.87 | 0.62 | 1.57  |
| Eya2   | 1.16 | 2.16 | 1.72 | 1.99 | 2.03  |
| Eya3   | 0    | 1.29 | 0.86 | 1.4  | 0     |
| Eya4   | 0.76 | 0.81 | 0.45 | 1.36 | 1.68  |
| Ezh1   | 1.05 | 0.13 | 1.4  | 0.27 | 0.34  |
| Ezh2   | 0.31 | 0.38 | 2.23 | 0.19 | 0     |
| Ezr    | NA   | 0    | 0.89 | 0    | 0.85  |
| F10    | 0.97 | 0.39 | 0.9  | 1.13 | 0     |
| F11    | 0.5  | 0.86 | 1.3  | 0    | 0     |
| F11r   | 0    | 0.86 | 0.62 | NA   | 0.51  |
| F12    | 0    | 2.02 | 0.06 | 0.7  | 2.97  |
| F13a1  | 0.77 | 1.96 | 2.01 | 5.09 | 0.49  |
| F13b   | 1.55 | 2    | 0.31 | 0.07 | 1.04  |
| F2     | 2.04 | 2.7  | 0.76 | 1.97 | 5.75  |
| F2r    | 0.48 | 0.13 | 1.3  | 3.95 | 1.63  |
| F2r11  | 1.85 | 1.86 | 0.59 | 1.85 | 1.34  |
| F2r12  | 1.95 | 1.05 | 0.63 | 1.63 | 0.61  |
| F2r13  | 0    | 2    | 2.66 | 0.7  | 0     |
| F3     | 0.55 | 1.27 | 2.3  | 5.13 | 0.87  |
| F5     | 0.24 | 4.24 | 2.37 | 1.71 | 0     |
| F7     | 0.79 | 2.55 | 3.72 | 3    | 0     |
| F8     | 0.61 | 3.42 | 1.38 | 2.9  | 0.86  |
| F9     | 3.72 | 2.25 | 1.26 | 1.09 | 2.83  |
| Fa2h   | 0.91 | 2.73 | 2.39 | 0.13 | 1.82  |
| Faah   | 0.8  | 1.12 | 0.21 | 1.96 | 0.63  |
| Fabp1  | 3.57 | 2.88 | 0.94 | NA   | 12.99 |
| Fabp12 | NA   | NA   | NA   | 6.78 | NA    |
| Fabp2  | 2.32 | 2.58 | 1.15 | 3.74 | 1.45  |
| Fabp3  | 1.73 | 0.94 | 2.05 | 0    | 3.53  |
| Fabp4  | 0.84 | 1.33 | 1.66 | 4.33 | 2.62  |
| Fabp5  | NA   | 0.27 | 3.69 | NA   | 3.8   |
| Fabp6  | 1.05 | 1.2  | 3.23 | 2.02 | 0     |
| Fabp7  | 0    | 1.5  | 0.5  | 0    | 4.84  |
| Fadd   | 1.64 | 1.07 | 0.92 | 5.26 | 2.99  |
| Fads1  | 0    | 1.01 | 3.06 | 0    | 0     |
| Fads2  | 1.27 | 2.64 | 1.53 | 0.4  | 0.53  |
| Fads3  | 0.19 | 1.14 | 0.28 | 0.73 | 0     |
| Fads6  | NA   | NA   | NA   | 0.67 | NA    |
| Faf1   | 0    | 0    | 0.73 | 0.99 | 1.47  |
| Faf2   | NA   | 0.79 | 1.64 | 0.53 | 1.93  |
| Fah    | 0    | 1.99 | 0.59 | 0.48 | 0     |

|           |      |      |      |      |      |
|-----------|------|------|------|------|------|
| Fahd1     | 0.86 | NA   | 2.03 | 0.5  | 0    |
| Fahd2a    | NA   | 0    | 0.91 | 0.71 | 0    |
| Faim      | 0.45 | 2    | 3.01 | 0.74 | 0    |
| Faim2     | 2.33 | 0.32 | 0.9  | 0.47 | 0    |
| Faim3     | NA   | 0    | 0.4  | 0.71 | 0    |
| Fam100a   | NA   | NA   | NA   | NA   | 3.73 |
| Fam100b   | NA   | NA   | NA   | NA   | 0    |
| Fam101a   | NA   | NA   | 0    | 2.33 | 4.39 |
| Fam101b   | NA   | NA   | 0.61 | 2.26 | 0.17 |
| Fam102a   | NA   | 0    | 1.33 | 0.95 | 1.98 |
| Fam102b   | NA   | NA   | 2.21 | 0    | 0    |
| Fam103a1  | NA   | NA   | 0.71 | NA   | 1.6  |
| Fam104a   | NA   | NA   | 1.36 | 0    | NA   |
| Fam105a   | NA   | 1.92 | 2.53 | 1.68 | 1.32 |
| Fam105b   | NA   | NA   | 0.49 | 0.75 | 1.16 |
| Fam107a   | NA   | 0    | 0.46 | 0.79 | 0    |
| Fam107b   | NA   | NA   | 0.48 | 4.83 | 0.11 |
| Fam109a   | NA   | NA   | 1.61 | 2.12 | 1.81 |
| Fam109b   | NA   | NA   | 2.78 | 0.39 | 3.54 |
| Fam110a   | NA   | NA   | 4.16 | 3.79 | 1.78 |
| Fam110b   | NA   | 1.96 | 1.23 | 0    | 0    |
| Fam110c   | NA   | NA   | 2.25 | 1.24 | 0    |
| Fam111a   | NA   | 1.03 | 1.83 | 1.92 | 0.06 |
| Fam113a   | NA   | NA   | NA   | NA   | 1.92 |
| Fam113b   | NA   | NA   | NA   | NA   | 0    |
| Fam114a1  | NA   | 0.16 | 0.89 | 2.38 | 1.12 |
| Fam114a2  | NA   | 3.1  | 1.92 | 0.35 | 0    |
| Fam115a   | NA   | 1.5  | 0.92 | 2.7  | 0.57 |
| Fam115c   | NA   | NA   | 2.12 | 0.16 | 5.26 |
| Fam116a   | NA   | NA   | NA   | NA   | 0    |
| Fam116b   | NA   | NA   | NA   | NA   | 0    |
| Fam117a   | NA   | 0.02 | 1    | 0    | 0    |
| Fam117b   | NA   | NA   | 0.74 | 1.64 | 0    |
| Fam118a   | NA   | 0.85 | 1.47 | 0.9  | 0    |
| Fam118b   | NA   | NA   | 0.32 | 1.98 | 0    |
| Fam119a   | NA   | NA   | NA   | NA   | 0    |
| Fam120a   | NA   | 0.46 | 0.48 | 0.22 | 0.89 |
| Fam120aos | NA   | NA   | 0.94 | NA   | NA   |
| Fam120b   | NA   | NA   | 1.79 | 2.5  | 1.41 |
| Fam120c   | NA   | 1.42 | 0.6  | 1.89 | 1.28 |
| Fam122a   | NA   | NA   | 0    | 0    | 3.87 |

|          |    |      |      |      |      |
|----------|----|------|------|------|------|
| Fam122b  | NA | NA   | 0.91 | 0.74 | 4.15 |
| Fam122c  | NA | NA   | 1.54 | 0    | 0    |
| Fam123a  | NA | NA   | NA   | NA   | 3.66 |
| Fam123c  | NA | NA   | NA   | NA   | 0    |
| Fam124a  | NA | NA   | 2.87 | NA   | NA   |
| Fam124b  | NA | 2.34 | 0    | 0    | 0    |
| Fam125a  | NA | NA   | NA   | NA   | 0    |
| Fam125b  | NA | NA   | NA   | NA   | 0    |
| Fam126a  | NA | NA   | 1.45 | 1.19 | 0    |
| Fam126b  | NA | NA   | 1.34 | 1.22 | 0    |
| Fam128b  | NA | NA   | NA   | NA   | 0    |
| Fam129a  | NA | 0.45 | 0.92 | 0    | 0    |
| Fam129b  | NA | NA   | 0.83 | 0    | 3.81 |
| Fam129c  | NA | NA   | 1.94 | 0.27 | 0    |
| Fam131a  | NA | 0.2  | 1.73 | 0.5  | 0    |
| Fam131b  | NA | 1.05 | 2.16 | 1.62 | 1.82 |
| Fam131c  | NA | NA   | 0.96 | 1.1  | 0    |
| Fam132a  | NA | NA   | 1.93 | 1.76 | 1.28 |
| Fam132b  | NA | NA   | NA   | 0.13 | NA   |
| Fam133b  | NA | NA   | NA   | NA   | 0    |
| Fam134a  | NA | 0.41 | 0.94 | 1.06 | 0    |
| Fam134b  | NA | 0.98 | 0.98 | 0.72 | 0.15 |
| Fam134c  | NA | 0    | 0.49 | 0    | 0.01 |
| Fam135a  | NA | 1.35 | 0.74 | 1.16 | 0    |
| Fam135b  | NA | NA   | 0.25 | 0.78 | 1.76 |
| Fam136a  | NA | 1.33 | 2.92 | 1.37 | 2.43 |
| Fam13a   | NA | 0.94 | 1.31 | 0.28 | 1.44 |
| Fam13b   | NA | 1.59 | 0.19 | 0.43 | 2.98 |
| Fam13c   | NA | 0.83 | 0.67 | 0.69 | 0    |
| Fam149a  | NA | 1.25 | 0.97 | 2.61 | 0    |
| Fam150a  | NA | NA   | NA   | 1.31 | NA   |
| Fam150b  | NA | NA   | NA   | 0    | NA   |
| Fam151a  | NA | NA   | 0    | NA   | NA   |
| Fam151b  | NA | NA   | NA   | 1.56 | NA   |
| Fam154a  | NA | NA   | 1.18 | 1.16 | 0.5  |
| Fam154b  | NA | NA   | 0    | 0    | NA   |
| Fam155a  | NA | 0.01 | 0.59 | NA   | 6.65 |
| Fam158a  | NA | NA   | NA   | NA   | 6    |
| Fam159a  | NA | NA   | NA   | 1.12 | NA   |
| Fam159b  | NA | NA   | NA   | 1.08 | NA   |
| Fam160a1 | NA | NA   | 0.85 | 0.48 | 2.21 |

|          |    |      |      |      |      |
|----------|----|------|------|------|------|
| Fam160a2 | NA | NA   | 0.62 | 1.54 | 0    |
| Fam160b1 | NA | NA   | 1.14 | 0    | 1.73 |
| Fam160b2 | NA | 0    | 2.33 | 0    | 0.79 |
| Fam161a  | NA | NA   | 0.55 | 0.15 | 1.61 |
| Fam161b  | NA | NA   | NA   | 0.83 | NA   |
| Fam162a  | NA | 0.86 | 0.38 | 2.44 | 0    |
| Fam162b  | NA | NA   | 3.31 | 1.31 | 2.71 |
| Fam163a  | NA | 1.9  | 1.6  | 1.52 | 0    |
| Fam163b  | NA | NA   | NA   | 1.52 | NA   |
| Fam164a  | NA | NA   | NA   | NA   | 0    |
| Fam164c  | NA | NA   | NA   | NA   | 1.71 |
| Fam165b  | NA | NA   | NA   | NA   | 0    |
| Fam166a  | NA | NA   | 1.16 | 0.2  | 0    |
| Fam167a  | NA | NA   | 1.56 | 2.45 | 0    |
| Fam167b  | NA | NA   | 2.35 | 1.27 | 0    |
| Fam168a  | NA | 0.01 | 1.22 | 0.85 | 1.53 |
| Fam168b  | NA | 0    | 1.76 | 1.52 | 0    |
| Fam169a  | NA | 0.04 | 0.93 | 1.48 | 2.09 |
| Fam169b  | NA | NA   | 1.35 | 1.28 | NA   |
| Fam170a  | NA | NA   | 1.16 | 5.28 | NA   |
| Fam170b  | NA | NA   | 1.35 | 1.11 | NA   |
| Fam171a1 | NA | 0    | 2.16 | 0    | 0    |
| Fam171a2 | NA | NA   | 1.25 | 0    | 0    |
| Fam171b  | NA | NA   | 1.84 | 0.18 | 1.46 |
| Fam172a  | NA | 1.81 | 0.97 | 0.75 | 0.65 |
| Fam173a  | NA | 2.8  | 1.94 | 0.57 | 0    |
| Fam173b  | NA | NA   | 1.78 | 0.87 | 0.88 |
| Fam174a  | NA | NA   | 0.28 | 0.87 | 0    |
| Fam174b  | NA | 2.23 | 0.51 | 1.69 | 0    |
| Fam175a  | NA | NA   | 1.96 | 0.41 | 1.96 |
| Fam175b  | NA | 1.15 | 1.02 | 0.27 | 0    |
| Fam176a  | NA | NA   | NA   | NA   | 0    |
| Fam176b  | NA | NA   | NA   | NA   | 0    |
| Fam178a  | NA | 1    | 1.3  | 0    | 0    |
| Fam178b  | NA | NA   | 0    | 1.43 | 0    |
| Fam179a  | NA | NA   | 1.38 | 1.42 | 0.59 |
| Fam179b  | NA | 0.47 | 1.24 | 2.38 | 2.5  |
| Fam180a  | NA | NA   | NA   | 0.02 | NA   |
| Fam181a  | NA | NA   | NA   | 1.08 | 0    |
| Fam181b  | NA | NA   | 0.02 | 1.44 | 0    |
| Fam183b  | NA | NA   | NA   | 1.5  | NA   |



|          |    |      |      |      |      |
|----------|----|------|------|------|------|
| Fam184a  | NA | 1.68 | 0    | 2.07 | 0    |
| Fam184b  | NA | NA   | 0.76 | 3.56 | 0.8  |
| Fam185a  | NA | NA   | 0.86 | 0.71 | 1.95 |
| Fam186b  | NA | NA   | NA   | 3.93 | NA   |
| Fam187b  | NA | NA   | 0.37 | 0.23 | 0    |
| Fam188a  | NA | 0.41 | 1.11 | 0.12 | 0    |
| Fam188b  | NA | NA   | 1.35 | 0    | 2.58 |
| Fam189a1 | NA | 2.22 | 0.07 | 0.93 | 3.92 |
| Fam189a2 | NA | 1.06 | 0    | 0.2  | 1.35 |
| Fam189b  | NA | 0.55 | 4.13 | 0.3  | 0    |
| Fam18b   | NA | NA   | NA   | NA   | 0    |
| Fam190a  | NA | NA   | NA   | NA   | 3.04 |
| Fam192a  | NA | 2.03 | 1    | 3.56 | 0    |
| Fam193a  | NA | 0    | 1.91 | 1.33 | NA   |
| Fam193b  | NA | 0.56 | 1.87 | 0.92 | NA   |
| Fam194a  | NA | NA   | 0.37 | 0.53 | NA   |
| Fam195a  | NA | NA   | 0.39 | 0.76 | NA   |
| Fam195b  | NA | NA   | 1.2  | 1.27 | NA   |
| Fam196a  | NA | NA   | 0    | 1.22 | NA   |
| Fam198a  | NA | NA   | NA   | 2.55 | NA   |
| Fam198b  | NA | 3.24 | 2.14 | 2.8  | NA   |
| Fam199x  | NA | NA   | 2.43 | 0.09 | NA   |
| Fam19a1  | NA | NA   | 0    | 0.58 | 0.64 |
| Fam19a2  | NA | NA   | 0    | 0.71 | 0    |
| Fam19a3  | NA | NA   | NA   | 0.84 | NA   |
| Fam19a4  | NA | NA   | 0.27 | 0    | 0    |
| Fam19a5  | NA | NA   | 0.29 | 1.2  | 0    |
| Fam203a  | NA | 0    | 0.21 | 1.14 | NA   |
| Fam207a  | NA | NA   | 2.47 | 1.16 | NA   |
| Fam20a   | NA | NA   | 0    | 1.82 | 0.94 |
| Fam20b   | NA | 0.36 | 1.1  | 6.78 | 1.37 |
| Fam20c   | NA | NA   | 4.07 | 0.22 | 2.04 |
| Fam210a  | NA | NA   | 1.3  | 1.07 | NA   |
| Fam210b  | NA | NA   | 0.48 | 0.73 | NA   |
| Fam211a  | NA | NA   | 0.4  | 1.54 | NA   |
| Fam211b  | NA | 2.34 | 0.59 | 1.37 | NA   |
| Fam212a  | NA | NA   | 3.25 | 0.11 | NA   |
| Fam212b  | NA | 0.44 | 0.05 | 0.93 | NA   |
| Fam213a  | NA | NA   | 1.8  | 0    | NA   |
| Fam213b  | NA | NA   | 4.31 | 1.65 | NA   |
| Fam214a  | NA | NA   | 1.25 | 2.2  | NA   |

|         |    |      |      |      |      |
|---------|----|------|------|------|------|
| Fam214b | NA | 2.33 | 3.17 | 0.22 | NA   |
| Fam216a | NA | 0.08 | 2.26 | NA   | NA   |
| Fam216b | NA | NA   | 1.63 | 5.37 | NA   |
| Fam217a | NA | NA   | 0.88 | 1.78 | NA   |
| Fam217b | NA | NA   | 1.37 | 0.1  | NA   |
| Fam219a | NA | NA   | 0.7  | 1.16 | NA   |
| Fam219b | NA | NA   | 2.42 | 8.71 | NA   |
| Fam220a | NA | NA   | 1.41 | 1.36 | NA   |
| Fam221a | NA | NA   | 0.7  | 0    | NA   |
| Fam221b | NA | NA   | 2.02 | 0.71 | NA   |
| Fam222a | NA | NA   | 2.6  | 1.1  | NA   |
| Fam222b | NA | 0.67 | 0.12 | 2.12 | NA   |
| Fam227a | NA | NA   | NA   | 0    | NA   |
| Fam227b | NA | NA   | 1.42 | 0.73 | NA   |
| Fam228a | NA | NA   | 1.04 | 0.81 | NA   |
| Fam229a | NA | NA   | 0.45 | NA   | NA   |
| Fam229b | NA | NA   | 1.89 | 1.89 | NA   |
| Fam24a  | NA | NA   | NA   | 1.61 | NA   |
| Fam26d  | NA | NA   | 0    | 1.46 | NA   |
| Fam26e  | NA | NA   | 2.26 | 0    | 0.06 |
| Fam26f  | NA | NA   | 1.56 | 0.8  | 2.66 |
| Fam32a  | NA | 2.28 | 0.87 | 3.15 | 4.75 |
| Fam35a  | NA | 2.02 | 1.7  | 0.76 | 0    |
| Fam36a  | NA | NA   | NA   | NA   | 0.02 |
| Fam38a  | NA | NA   | NA   | NA   | 0    |
| Fam38b  | NA | NA   | NA   | NA   | 0    |
| Fam3a   | NA | 1.76 | 1.18 | 1.03 | 0.1  |
| Fam3b   | NA | NA   | 0    | 2.93 | 0.32 |
| Fam3c   | NA | 0.02 | 1.58 | 0.61 | 0    |
| Fam40a  | NA | NA   | NA   | NA   | 2.68 |
| Fam40b  | NA | NA   | NA   | NA   | 0.04 |
| Fam43a  | NA | NA   | 3.25 | 1.08 | 0    |
| Fam43b  | NA | NA   | 0.52 | 0.66 | NA   |
| Fam45a  | NA | 3.93 | 2.75 | 0.34 | 2.4  |
| Fam46a  | NA | 2.9  | 0.47 | 0    | 1.61 |
| Fam46b  | NA | NA   | 2.22 | 2.1  | 0    |
| Fam46c  | NA | 0.75 | 0.74 | 0    | 0.1  |
| Fam46d  | NA | NA   | NA   | 0.65 | NA   |
| Fam47a  | NA | NA   | NA   | NA   | 0    |
| Fam47c  | NA | NA   | 0.92 | 0.21 | NA   |
| Fam47e  | NA | 2.87 | 0.88 | 0.68 | NA   |

|         |    |      |      |       |       |
|---------|----|------|------|-------|-------|
| Fam48a  | NA | NA   | NA   | NA    | 0.21  |
| Fam49a  | NA | 1.47 | 0.56 | 2.99  | 0.2   |
| Fam49b  | NA | 0    | 2.92 | 0.17  | 0     |
| Fam50a  | NA | 2.03 | 2.44 | 2.33  | 0     |
| Fam50b  | NA | 4    | 0    | 0.8   | 3.17  |
| Fam53a  | NA | NA   | 2.46 | 3.51  | 0     |
| Fam53b  | NA | 0    | 1.21 | 2     | 0     |
| Fam53c  | NA | 0.27 | 1.27 | 1.78  | 0     |
| Fam54a  | NA | NA   | NA   | NA    | 0     |
| Fam54b  | NA | NA   | NA   | NA    | 0     |
| Fam55c  | NA | NA   | NA   | NA    | 2.26  |
| Fam55d  | NA | NA   | NA   | NA    | 6.09  |
| Fam57a  | NA | 0.92 | 0.11 | 0.4   | 11.18 |
| Fam57b  | NA | NA   | 0.22 | 6.56  | 0     |
| Fam59a  | NA | NA   | NA   | NA    | 1.1   |
| Fam59b  | NA | NA   | NA   | NA    | 2.36  |
| Fam5b   | NA | 2.94 | 1.69 | 1.64  | 4.36  |
| Fam5c   | NA | 0.93 | 2.43 | 0.87  | 0     |
| Fam60a  | NA | 0.18 | 4.18 | 1.18  | 0     |
| Fam63a  | NA | 0.27 | 1.72 | 0.81  | 0.5   |
| Fam63b  | NA | 2.25 | 0.01 | 1.05  | 0     |
| Fam64a  | NA | 1.65 | 2.99 | 1.08  | 0     |
| Fam65a  | NA | 0    | 1    | NA    | 1.19  |
| Fam65b  | NA | 0.86 | 0.06 | 1.19  | 0     |
| Fam65c  | NA | NA   | 0.57 | 1.15  | 0     |
| Fam69a  | NA | 0    | 1.09 | 1.11  | 0     |
| Fam69b  | NA | NA   | 1.05 | 1.9   | 4.47  |
| Fam69c  | NA | NA   | NA   | 1.79  | NA    |
| Fam70a  | NA | NA   | NA   | NA    | 0.82  |
| Fam71a  | NA | NA   | 0.31 | 0.28  | NA    |
| Fam71b  | NA | NA   | 0    | 10.33 | NA    |
| Fam71d  | NA | NA   | 0.16 | 0.05  | NA    |
| Fam71e1 | NA | NA   | 1.86 | NA    | 1.26  |
| Fam71e2 | NA | NA   | NA   | 0.9   | NA    |
| Fam71f1 | NA | NA   | 2.27 | 0.44  | 1.51  |
| Fam71f2 | NA | NA   | NA   | 1.44  | NA    |
| Fam72a  | NA | NA   | 2.32 | 0     | NA    |
| Fam73a  | NA | NA   | 2.66 | 0     | 0     |
| Fam73b  | NA | NA   | 0.81 | 0     | 3.73  |
| Fam76a  | NA | 1.42 | 0.44 | 2.07  | 0     |
| Fam76b  | NA | NA   | 1.72 | 1.01  | 0     |

|          |      |      |      |      |      |
|----------|------|------|------|------|------|
| Fam78a   | NA   | NA   | 0.63 | 2.54 | 0    |
| Fam78b   | NA   | NA   | 0.62 | 0    | 1.69 |
| Fam81a   | NA   | NA   | 0.4  | 0.85 | 0.13 |
| Fam81b   | NA   | NA   | 0.71 | NA   | 0.86 |
| Fam82a1  | NA   | NA   | NA   | NA   | 1.3  |
| Fam82a2  | NA   | NA   | NA   | NA   | 2.08 |
| Fam82b   | NA   | NA   | NA   | NA   | 0    |
| Fam83a   | NA   | NA   | NA   | 0.44 | NA   |
| Fam83b   | NA   | NA   | NA   | 1.82 | NA   |
| Fam83c   | NA   | NA   | NA   | 1.01 | NA   |
| Fam83d   | NA   | NA   | 2.72 | 0.11 | 0.07 |
| Fam83e   | NA   | 0    | 0.27 | 1.3  | 2.29 |
| Fam83f   | NA   | NA   | 0.13 | 1.16 | 0    |
| Fam83g   | NA   | NA   | 0.91 | NA   | NA   |
| Fam83h   | NA   | NA   | 0.72 | 1.89 | 1.16 |
| Fam84a   | NA   | NA   | 0.93 | 2.52 | 0    |
| Fam84b   | NA   | NA   | 1.14 | 2.67 | 0.54 |
| Fam89a   | NA   | NA   | 1.5  | 1.25 | 0    |
| Fam89b   | NA   | NA   | NA   | 2.84 | NA   |
| Fam92b   | NA   | NA   | NA   | 0    | NA   |
| Fam96a   | NA   | NA   | 0.96 | 0.79 | 0    |
| Fam96b   | NA   | 0    | 2.33 | 0    | 0    |
| Fam98a   | NA   | 0.1  | 1.24 | 0.94 | 0    |
| Fam98b   | NA   | NA   | 1.97 | 0.72 | 3.22 |
| Fam98c   | NA   | NA   | 2.48 | NA   | 0    |
| Fanca    | 0.93 | 0.52 | 1.5  | 0.96 | 2.72 |
| Fanfb    | NA   | NA   | 1.05 | 0.8  | 1.37 |
| Fancc    | 0.08 | 0.76 | 0.46 | 0.27 | 1.46 |
| Fancd2   | 0    | NA   | 1.4  | 0    | 0.93 |
| Fancd2os | NA   | NA   | 1.67 | NA   | NA   |
| Fance    | 0.04 | 0    | 1.42 | 0.62 | 0.79 |
| Fanff    | NA   | 0.78 | 0.52 | 1.55 | 1.6  |
| Fancg    | 0    | 0    | 1.67 | 0    | 0.19 |
| Fanci    | NA   | 0    | 0.87 | 0    | 0    |
| Fancl    | 0    | 1.16 | 0.55 | 1.54 | 0    |
| Fancm    | NA   | NA   | 0.85 | 0.18 | 0.13 |
| Fank1    | 0    | NA   | 0.62 | 0    | 0.76 |
| Fap      | 2.11 | 0.06 | 0.05 | 0    | 0    |
| Far1     | NA   | NA   | 1.92 | 2.12 | 0    |
| Far2     | NA   | 2.36 | 1.53 | 3.28 | 0    |
| Farp1    | 1.08 | 1.11 | 0.93 | 0    | 0    |

|         |      |      |      |      |       |
|---------|------|------|------|------|-------|
| Farp2   | 1.53 | 0.65 | 0.98 | 0.07 | 0.61  |
| Fars2   | NA   | 0.07 | 0.32 | 0    | 0.09  |
| Farsa   | NA   | 0.62 | 0.73 | 1.46 | 0     |
| Farsb   | NA   | NA   | 1.31 | NA   | 0.26  |
| Farslb  | 0.4  | NA   | NA   | NA   | NA    |
| Fas     | NA   | 0.25 | 2.54 | 0    | 0     |
| Fasn    | 0.21 | 0.52 | 1.83 | 0    | 0     |
| Fastk   | 0    | 1.49 | 0.5  | 1.53 | 3.88  |
| Fastkd1 | NA   | 1.61 | 0.3  | 2.32 | 4.52  |
| Fastkd2 | NA   | 0.03 | 1.13 | 1.41 | 1.84  |
| Fastkd3 | NA   | 0.77 | 0.83 | 0.66 | 0     |
| Fastkd5 | NA   | 3.4  | 1.77 | 0.83 | 2.16  |
| Fat1    | NA   | 0.51 | 2.92 | 3.52 | 2.33  |
| Fat2    | NA   | 1.77 | 0    | 0.61 | 0     |
| Fat3    | NA   | NA   | 2.83 | 0.23 | 3.7   |
| Fat4    | NA   | 1.43 | 3.04 | 1.04 | 0     |
| Fate1   | NA   | NA   | NA   | 0.76 | NA    |
| Fau     | 2.58 | 1.87 | 1.64 | 1.61 | NA    |
| Faxc    | NA   | NA   | 0.64 | 0.79 | NA    |
| Fbf1    | 1.43 | NA   | 0.85 | 1.48 | 4.14  |
| Fbl     | 0.26 | 3.01 | 0.98 | 0.07 | 3.75  |
| Fblim1  | NA   | NA   | 0.72 | 3.37 | 2.34  |
| Fbll1   | NA   | NA   | 0.1  | 0    | 0     |
| Fbln1   | 0.27 | 0.92 | 1.23 | 0.4  | 2.6   |
| Fbln2   | 0    | 1.28 | 0.39 | 1.23 | 0     |
| Fbln5   | 1.69 | 1.45 | 0.09 | 0.26 | 1.75  |
| Fbln7   | NA   | NA   | 0.64 | 0.84 | 0.96  |
| Fbn1    | 0.77 | 0    | 0.89 | 0    | 1.31  |
| Fbn2    | 0.71 | 0    | 1.54 | 3.1  | 2.02  |
| Fbp1    | 5.44 | 3.3  | 4.56 | 0.52 | 0     |
| Fbp2    | 0    | 0.71 | 2.62 | 1.25 | 12.36 |
| Fbrs    | NA   | 0.43 | 1.08 | 0.63 | 0     |
| Fbrsl1  | NA   | NA   | 0.05 | 0.76 | 2.9   |
| Fbs1    | 0.6  | NA   | NA   | NA   | NA    |
| Fbxl10  | 0    | NA   | NA   | NA   | NA    |
| Fbxl11  | 0.58 | NA   | NA   | NA   | NA    |
| Fbxl12  | 0    | 0    | 1.32 | 0.78 | 2.12  |
| Fbxl13  | 0    | NA   | 1.79 | 0    | NA    |
| Fbxl14  | 0.92 | 3    | 0.51 | 3.28 | 7.16  |
| Fbxl15  | 0    | 3.25 | 0.83 | 0.82 | 1.44  |
| Fbxl16  | 0.19 | NA   | 0.36 | 0    | 0.96  |

|        |      |      |      |      |      |
|--------|------|------|------|------|------|
| Fbxl17 | 1.19 | NA   | 1.93 | 1.4  | 0.05 |
| Fbxl18 | 0.14 | 0    | 0.71 | 1.81 | 2.31 |
| Fbxl19 | 6.58 | NA   | 0.57 | 1.11 | 2.31 |
| Fbxl2  | 3.49 | 1.68 | 3.18 | 0.67 | 0.86 |
| Fbxl20 | 0    | NA   | 1.66 | 0.01 | 0    |
| Fbxl21 | 0.48 | NA   | 0.16 | 1.33 | NA   |
| Fbxl22 | NA   | NA   | NA   | 1.76 | NA   |
| Fbxl3  | NA   | NA   | 0.38 | 0    | 0    |
| Fbxl4  | 2.15 | 4.69 | 2.66 | 2.73 | 6.87 |
| Fbxl5  | 0.27 | 0.36 | 0.12 | 0    | 0    |
| Fbxl6  | 0.27 | 1    | 0.44 | NA   | 3.28 |
| Fbxl7  | 0.41 | 0.17 | 0.36 | 0.19 | 0    |
| Fbxl8  | 0.9  | 3.5  | 4.66 | 2.85 | 0    |
| Fbxo10 | NA   | NA   | 1.94 | NA   | 0    |
| Fbxo11 | 0.51 | 0    | 2.89 | 0.93 | 0.6  |
| Fbxo15 | 1.71 | NA   | 1.32 | 1.07 | 0.11 |
| Fbxo16 | 2.87 | NA   | 1.51 | 0.13 | 0    |
| Fbxo17 | 1.07 | 1.31 | 0.72 | 1.96 | NA   |
| Fbxo18 | 0.46 | NA   | 0.94 | 0.46 | 2.61 |
| Fbxo2  | 4.45 | 0    | 0.92 | NA   | 0    |
| Fbxo21 | 0.43 | 0    | 0.08 | 3.32 | 0    |
| Fbxo22 | 0.76 | 0.98 | 1.38 | NA   | 1.29 |
| Fbxo24 | 0    | 0.71 | 1.67 | 0.81 | 0.13 |
| Fbxo25 | 2.06 | NA   | 0.4  | 0    | 0    |
| Fbxo27 | 2.11 | NA   | 1.29 | 1.55 | 0    |
| Fbxo28 | 0.6  | 0.67 | 1.08 | 0.57 | 1.71 |
| Fbxo3  | 0.55 | 1.14 | 0.16 | 0.56 | 0    |
| Fbxo30 | 0.09 | NA   | 1.2  | 0.53 | 1.28 |
| Fbxo31 | 0.39 | NA   | 2.33 | 0    | 0.52 |
| Fbxo32 | 0.94 | NA   | 2.3  | 0.4  | 0.47 |
| Fbxo33 | NA   | NA   | 2.87 | 0.88 | 1.26 |
| Fbxo34 | 0.62 | 0.08 | 1.83 | 4.81 | 0    |
| Fbxo36 | 1.42 | NA   | 2.96 | 0.48 | 0    |
| Fbxo38 | 0.21 | 1.59 | 0.74 | 0.24 | 0.21 |
| Fbxo39 | NA   | NA   | NA   | 1.26 | NA   |
| Fbxo4  | 0    | 1.32 | 0.51 | 0.99 | 0.18 |
| Fbxo40 | 0    | NA   | NA   | 0.84 | NA   |
| Fbxo41 | NA   | 0    | 0.35 | 0.5  | 0    |
| Fbxo42 | 0.55 | 0.68 | 1.17 | 0    | 0    |
| Fbxo43 | 0    | NA   | 2.53 | 0    | 0    |
| Fbxo44 | 0.97 | NA   | 0    | 1.23 | 2.78 |

|         |      |      |      |      |      |
|---------|------|------|------|------|------|
| Fbxo45  | NA   | NA   | 1.38 | 1.94 | 0    |
| Fbxo46  | 1.22 | 0    | 1.42 | 1.04 | 0.93 |
| Fbxo47  | NA   | NA   | NA   | 1.41 | NA   |
| Fbxo48  | NA   | NA   | NA   | 0.24 | NA   |
| Fbxo5   | 0    | 0.36 | 2.67 | 0    | 3.68 |
| Fbxo6   | NA   | NA   | 1.23 | 3.83 | 0    |
| Fbxo7   | 1.7  | 0    | 1.37 | 0    | 3.38 |
| Fbxo8   | 0.49 | NA   | 1.91 | 0.41 | 3.6  |
| Fbxo9   | 0.8  | 1.5  | 2.32 | 0.42 | 1.37 |
| Fbxw10  | NA   | NA   | 2.2  | NA   | 0    |
| Fbxw11  | 0.13 | 0.77 | 0.72 | 0.08 | 1.91 |
| Fbxw2   | 0.28 | 1.03 | 0.66 | 1.51 | 0    |
| Fbxw4   | 0.28 | 0    | 1.04 | 1.02 | 0    |
| Fbxw5   | 0.76 | NA   | 1.91 | 0.59 | 2.18 |
| Fbxw7   | 0.19 | 2.06 | 1.61 | 0    | 1.63 |
| Fbxw8   | NA   | NA   | 0.27 | 0.24 | 1.16 |
| Fbxw9   | 0    | NA   | 3.19 | 1.18 | 1.78 |
| Fcamr   | 0.58 | NA   | 2.71 | 3.29 | 0    |
| Fcer1a  | 4.7  | 0    | 0.58 | 4.78 | 0    |
| Fcer1g  | 2.12 | 0    | 1.27 | 0    | 0    |
| Fcfl    | NA   | 1.32 | 0    | 4.23 | 0.98 |
| Fcgbp   | NA   | 0    | 2.97 | NA   | 0    |
| Fcgr2b  | 1.08 | 0.43 | 1.7  | 3.02 | 1.72 |
| Fcgrt   | 0.08 | 0.34 | 3.18 | 1.32 | 2.28 |
| Fcho1   | 0    | 0    | 1.69 | 0.04 | 1.46 |
| Fcho2   | NA   | NA   | 2.41 | 0.71 | 1.19 |
| Fchsd1  | 0.45 | NA   | 2.43 | 0    | 0    |
| Fchsd2  | 0.52 | 0.23 | 0.29 | 1.36 | 0.91 |
| Fcmd    | 1.2  | NA   | NA   | NA   | NA   |
| Fcrl1   | NA   | NA   | 0.43 | 2.37 | 0    |
| Fcrl3   | 2.29 | NA   | NA   | NA   | NA   |
| Fcrl5   | NA   | NA   | NA   | 1.37 | NA   |
| Fcrl6   | NA   | NA   | NA   | 0.59 | NA   |
| Fcrla   | NA   | NA   | 0.41 | 1.51 | 1.17 |
| Fcrlb   | NA   | NA   | NA   | 0.06 | NA   |
| Fdft1   | 1.23 | 0    | 1.23 | 0    | 0    |
| Fdps    | 1.19 | 0.06 | 1.36 | 2.62 | 1.4  |
| Fdx1    | 0    | 0.03 | 0.34 | 0.64 | 0    |
| Fdx11   | NA   | NA   | NA   | 1.32 | NA   |
| Fdxacb1 | NA   | NA   | NA   | 1.19 | NA   |
| Fdxr    | 0.18 | 1.33 | 0.65 | 4.8  | 0.95 |

|        |      |      |      |      |       |
|--------|------|------|------|------|-------|
| Fech   | 0.24 | 1.02 | 0.62 | 0.52 | 0     |
| Fem1a  | 0.05 | NA   | 0.53 | 1.84 | 0     |
| Fem1b  | 1.78 | 0.5  | 5.81 | 0    | 0     |
| Fem1c  | 0.74 | 0    | 2.92 | 0    | 6.12  |
| Fen1   | 0.44 | 1.06 | 1.43 | 0.79 | 0.77  |
| Fendrr | NA   | NA   | 2.11 | NA   | NA    |
| Fer113 | 0.28 | NA   | NA   | NA   | NA    |
| Fer114 | 1.99 | 2.88 | 1.51 | 1.51 | 0     |
| Ferd31 | 0.96 | NA   | 1.57 | 2.5  | NA    |
| Fermt1 | NA   | NA   | NA   | 0    | NA    |
| Fermt2 | NA   | 0.78 | 0    | 0.03 | 1.36  |
| Fermt3 | NA   | NA   | 0.3  | 0.89 | 0     |
| Fes    | 0    | 0.02 | 0.55 | 1.23 | 0     |
| Fetub  | 0.72 | 1.53 | 1.16 | 5.43 | 1.38  |
| Fev    | 3.14 | 1.77 | 4.02 | 0.88 | 0     |
| Fez1   | 0.86 | 0    | 0    | 2.66 | 2.57  |
| Fez2   | 0    | 3.24 | 1.81 | 0.75 | 0     |
| Fezfl  | NA   | NA   | NA   | 1.1  | NA    |
| Fezf2  | NA   | 3.53 | 0.54 | 2.24 | 0     |
| Ffar1  | NA   | NA   | NA   | 0.33 | NA    |
| Ffar2  | NA   | 0.5  | 2.51 | 1.55 | 0     |
| Ffar3  | NA   | NA   | NA   | 1.04 | NA    |
| Ffar4  | NA   | NA   | 4.09 | 0.38 | NA    |
| Fga    | 0    | 1.85 | 1.81 | 2.94 | 10.85 |
| Fgb    | 0.7  | 1.35 | 1.63 | 7.53 | 10.62 |
| Fgd1   | 2.92 | 0.09 | 1.16 | NA   | 0     |
| Fgd2   | 0.94 | 2.65 | 3.68 | 2.72 | 0.21  |
| Fgd3   | 0.77 | NA   | 1.06 | 2.01 | 0.93  |
| Fgd4   | 0.58 | NA   | 0.2  | 1.3  | 0     |
| Fgd5   | 1.96 | NA   | 2.55 | 1.9  | 0     |
| Fgd6   | 0.76 | 1.14 | 2.5  | 4.26 | 0.51  |
| Fgf1   | 0.64 | 1.68 | 1.66 | 0    | 0     |
| Fgf10  | 0    | NA   | 0    | 0.76 | 7.42  |
| Fgf11  | 1.45 | NA   | 1.86 | 0.19 | 0     |
| Fgf12  | 1.38 | 0.98 | 0.32 | 0    | 0     |
| Fgf13  | 1.03 | 2.18 | 1.56 | 0.05 | 2.31  |
| Fgf14  | 0.34 | 1.25 | 0.75 | 4.87 | 0     |
| Fgf16  | 2.58 | 0.39 | 1.99 | 0.83 | 3.27  |
| Fgf17  | 3.39 | 3.22 | 0.52 | 2.02 | 0     |
| Fgf18  | 0.24 | 1.49 | 0.86 | 2.6  | 6.05  |
| Fgf2   | 4.2  | 0    | 0.9  | NA   | 0     |



|          |      |      |      |      |       |
|----------|------|------|------|------|-------|
| Fgf20    | 0.62 | 2.21 | 0.52 | 1.13 | 0     |
| Fgf21    | 1.85 | 1.99 | 1.12 | 1.72 | 0     |
| Fgf22    | 0.87 | 0.27 | 1.1  | 1.21 | 1.02  |
| Fgf23    | 1.79 | 3.19 | 2.16 | 1.02 | 1.98  |
| Fgf3     | 1.98 | 1.8  | 0.23 | 1.16 | 0     |
| Fgf4     | 0    | 0    | 0    | 1.86 | 0.69  |
| Fgf5     | 0.36 | 0.06 | 1.09 | 0    | 0     |
| Fgf6     | 2.2  | 0.92 | 2.38 | 3.47 | 4.02  |
| Fgf7     | 0    | 1.6  | 0.57 | 0    | 0     |
| Fgf8     | 2.7  | 1.51 | 0.04 | 1.49 | 0     |
| Fgf9     | 2.52 | 0.26 | 0.89 | 0.22 | 0     |
| Fgfbp1   | 0.55 | 1.35 | 0    | 0.87 | 0     |
| Fgfbp3   | NA   | NA   | 2.18 | 0    | 1.2   |
| Fgfr1    | 0.62 | 1.14 | 2.21 | 2.16 | 0.64  |
| Fgfr1op  | 0.84 | 1.22 | 3.08 | 0.74 | 1.1   |
| Fgfr1op2 | 0.8  | NA   | 0.81 | 0.03 | 0     |
| Fgfr2    | 0.58 | 0.41 | 0.78 | 1.16 | 1.08  |
| Fgfr3    | 0.49 | 0.12 | 0.59 | 2.41 | 1.68  |
| Fgfr4    | 0.61 | 0.79 | 0.29 | 0    | 0     |
| Fgfrl1   | 1.08 | NA   | 0.49 | 1.45 | NA    |
| Fgg      | 0.58 | 2.03 | 1.19 | 0.89 | 7.32  |
| Fggy     | NA   | 2.34 | 1    | 1.01 | 1.76  |
| Fgl1     | 1.44 | 1.16 | 2.79 | 2.48 | 4.18  |
| Fgl2     | 0.96 | 1.07 | 1.03 | 1.56 | 0     |
| Fgr      | 1.39 | 0.74 | 2.11 | 1.92 | 0     |
| Fhad1    | NA   | NA   | 1.21 | 0    | NA    |
| Fhdc1    | NA   | NA   | 0.11 | 1.3  | 2.97  |
| Fhit     | 0.05 | 0    | 0.7  | 0.78 | 0     |
| Fhl1     | 1.85 | 0    | 1.75 | 0.87 | 0     |
| Fhl2     | 0.93 | 2.34 | 2.14 | 0.66 | 0     |
| Fhl3     | 0.83 | 2.48 | 2.77 | 2.34 | 13.61 |
| Fhl5     | 1.26 | 1.33 | 2.02 | 0.63 | 2.39  |
| Fhod1    | 0.24 | 0.8  | 1.88 | 4.34 | 1.22  |
| Fhod3    | NA   | 1.08 | 0.91 | 0    | 0     |
| Fibcd1   | 0.79 | NA   | 0.51 | 1.36 | 3.83  |
| Fibin    | NA   | NA   | 0    | 1.6  | 3.05  |
| Fibp     | 0.6  | 0    | 1.06 | 1.53 | 0     |
| Ficd     | NA   | 1.71 | 1.52 | 0    | 0     |
| Fig4     | NA   | 2.51 | 1.32 | 0    | 0     |
| Figf     | 2.7  | 1.04 | 1.54 | 2.16 | 4.31  |
| Figla    | 0.49 | NA   | 0    | 0.65 | NA    |

|         |      |      |      |       |      |
|---------|------|------|------|-------|------|
| Fign    | 0    | NA   | 1.02 | 0     | 1.27 |
| Fignl1  | 1.84 | NA   | 0.88 | 1.11  | 4.23 |
| Fignl2  | NA   | NA   | NA   | 1.61  | NA   |
| Filip1  | NA   | NA   | 0.94 | 1.16  | 0.02 |
| Filip11 | NA   | 1.3  | 1.98 | 0     | 0    |
| Fip111  | 0.37 | 0    | 1.02 | 0.24  | 0    |
| Fis1    | NA   | 2.27 | 0.64 | 0.16  | 0    |
| Fitm1   | NA   | NA   | 0.82 | 1.05  | 0.93 |
| Fitm2   | NA   | NA   | 0.78 | 2.41  | 0.72 |
| Fiz1    | 0.08 | NA   | 3.85 | 0.63  | 0    |
| Fjx1    | 0    | 1.82 | 0.75 | 4.04  | 0    |
| Fkbp10  | 1.4  | 1.32 | 1.34 | NA    | 0    |
| Fkbp11  | 0.47 | 0    | 0.96 | 0.38  | 0    |
| Fkbp14  | 3.19 | 0.07 | 0.83 | 0.91  | 0.6  |
| Fkbp15  | NA   | 0    | 1.02 | 0     | 0.56 |
| Fkbp1a  | 0    | 0.94 | 0.36 | 0     | 1.92 |
| Fkbp1b  | NA   | 2.02 | 1.19 | 1.45  | 5.25 |
| Fkbp2   | 0.08 | 2.08 | 0.85 | 0.38  | 2.56 |
| Fkbp3   | 2.09 | 1.74 | 0    | NA    | 0.33 |
| Fkbp4   | 0    | 1.19 | 0.5  | 3.08  | 1.55 |
| Fkbp5   | 0.64 | 0.44 | 0.75 | NA    | 0    |
| Fkbp6   | 0    | 1.07 | 0.27 | 2.26  | 0    |
| Fkbp7   | 0.3  | NA   | 0.64 | 0.76  | 0    |
| Fkbp8   | 1.03 | 0.61 | 0.28 | 6.56  | 1.27 |
| Fkbp9   | 0.74 | 0.26 | 0.98 | 2.61  | 1.36 |
| Fkbp1   | 1.11 | 0    | 0.76 | 0.77  | 2.17 |
| Fkhl18  | 0    | NA   | NA   | NA    | NA   |
| Fkrp    | 2.05 | 0.55 | 0.75 | 2.19  | 0.57 |
| Fktn    | NA   | 0    | 2.57 | 3.74  | 1.82 |
| Flad1   | NA   | 0.6  | 0.06 | 0     | 0    |
| Flcn    | NA   | 1.86 | 2.23 | 5.19  | 1    |
| Flg     | NA   | 0.96 | 0.51 | NA    | 0.63 |
| Flg2    | NA   | NA   | NA   | 0     | NA   |
| Fli1    | 0.06 | 0    | 2.08 | 1.06  | 0.64 |
| Flii    | NA   | 1.55 | 1.71 | 0     | 1.68 |
| Flna    | 0.43 | 2.56 | 3.86 | 13.81 | 1.17 |
| Flnb    | 0.51 | 0    | 0.19 | 0     | 0.59 |
| Flnc    | NA   | 1.49 | 0.87 | 2.61  | 4.69 |
| Flot1   | 1.42 | 0.02 | 1.17 | 0.06  | 0    |
| Flot2   | 0.41 | 0.37 | 0.97 | 0.77  | 0    |
| Flrt1   | 0    | 0.83 | 2.41 | 2.08  | 0    |

|         |      |      |      |      |      |
|---------|------|------|------|------|------|
| Flrt2   | 1.81 | 0    | 9.75 | 1.96 | 0    |
| Flrt3   | 1.87 | 1.65 | 0.89 | 0    | 0    |
| Flt1    | 1.13 | 0.21 | 2.38 | 1.28 | 1.73 |
| Flt3    | 1.22 | 1.55 | 0.25 | 0    | 3.28 |
| Flt4    | 0    | 0.69 | 1    | 2.86 | 0.9  |
| Flywch1 | NA   | NA   | 1.28 | 1.9  | 2    |
| Flywch2 | NA   | NA   | 1.84 | 1.03 | 3.31 |
| Fmn1    | NA   | NA   | 0.6  | 0.33 | 1.87 |
| Fmn2    | 0    | NA   | 0.75 | 2.12 | 1.37 |
| Fmnl1   | 1.75 | 0.24 | 1.5  | 1.76 | 0    |
| Fmnl2   | 0.44 | NA   | 2.52 | 1.38 | 1.18 |
| Fmnl3   | 0.42 | NA   | 1.48 | 1.86 | 0    |
| Fmo1    | 0.67 | 2.58 | 0    | 0    | 4.53 |
| Fmo2    | 1.16 | 0.99 | 0    | 1.12 | 1.69 |
| Fmo3    | 0.58 | 6.11 | 1.95 | 0.07 | 1.69 |
| Fmo4    | 0    | 0.34 | 0    | 1.71 | 2.63 |
| Fmo5    | 1.12 | 1.37 | 1.89 | 2.87 | 0.28 |
| Fmod    | 4.11 | 1.9  | 1.33 | 0    | 0    |
| Fmr1    | 0.71 | 0.74 | 1.03 | 0.9  | 1.21 |
| Fmr1nb  | NA   | NA   | 1.66 | 1.38 | NA   |
| Fn1     | 0    | 0.92 | 0.59 | 0    | 3.36 |
| Fn3k    | 0    | 1.03 | 0.09 | 1.29 | 0    |
| Fn3krp  | NA   | 0    | 1.29 | 0.57 | 0    |
| Fnbp1   | 0.98 | 0    | 3.82 | 0    | 0    |
| Fnbp11  | NA   | 0.5  | 0.73 | 0.14 | 0.19 |
| Fnbp4   | 0.94 | 0    | 1.7  | 0.66 | 1.78 |
| Fndc1   | NA   | NA   | 0.17 | 2.81 | 1.61 |
| Fndc3a  | NA   | 0.25 | 0.88 | 0.84 | 0    |
| Fndc3b  | NA   | 0    | 1.53 | 1.43 | 0    |
| Fndc4   | 0.38 | 1.63 | 2.09 | 1.3  | 0    |
| Fndc5   | 0    | NA   | 0.83 | 0.83 | 2.59 |
| Fndc7   | NA   | NA   | 0.02 | 0    | 0    |
| Fndc8   | NA   | 0    | 1.1  | 3.22 | 0    |
| Fndc9   | NA   | NA   | 2.6  | 2.3  | NA   |
| Fnip1   | NA   | 2.32 | 0.39 | 0    | 1.68 |
| Fnip2   | NA   | NA   | 1.03 | 1.81 | 0    |
| Fnta    | 0.04 | 0.24 | 0.98 | 0    | NA   |
| Fntb    | 0.68 | 0    | 1.11 | 0.83 | 0    |
| Focad   | NA   | 0    | 1.27 | 0    | NA   |
| Folh1   | 1.12 | 0.79 | 1.75 | 0    | 1.08 |
| Folr1   | 0.07 | 2.18 | 1.95 | 1.42 | 0    |

|       |      |      |      |      |      |
|-------|------|------|------|------|------|
| Folr2 | 0.4  | 1.6  | 1.21 | 2.26 | 0    |
| Fopnl | NA   | NA   | 1.92 | 1.47 | NA   |
| Fos   | 0    | 1.39 | 0.68 | 0.95 | 0    |
| Fosb  | 0.4  | 0    | 2.34 | 1.03 | 2.43 |
| Fosl1 | 0    | 0.23 | 3.4  | NA   | 0    |
| Fosl2 | 0.04 | 0.42 | 0.8  | 1.93 | 0    |
| Foxa1 | 2.26 | 0.42 | 1.17 | 0.7  | 0    |
| Foxa2 | 2.46 | 1.4  | 2.26 | 0.9  | 0    |
| Foxa3 | 0    | NA   | 1.15 | 0.93 | 1.45 |
| Foxb1 | 0.3  | 2.03 | 0.16 | 0.57 | 0    |
| Foxb2 | 0    | NA   | NA   | 0.85 | NA   |
| Foxc1 | 0    | 0    | 1.05 | 0    | 0    |
| Foxc2 | 1.71 | 1.98 | 2.08 | 0.97 | 0    |
| Foxd1 | 0    | 1.35 | 1.95 | 0.57 | 2.38 |
| Foxd2 | 0    | 1.7  | 1.68 | 1.22 | 0    |
| Foxd3 | 1.43 | 0.77 | 0.4  | 3.5  | 0    |
| Foxd4 | 1.79 | NA   | 0.88 | NA   | NA   |
| Foxe1 | NA   | NA   | NA   | 1.32 | NA   |
| Foxe3 | 1.56 | 1.61 | 0    | 0.85 | 6.62 |
| Foxf1 | NA   | 0.23 | 0.52 | 0.88 | NA   |
| Foxf2 | 0.93 | 0.76 | 1.18 | 2.66 | 1.11 |
| Foxg1 | NA   | 1    | 0    | NA   | 3.31 |
| Foxh1 | 1.77 | 0.76 | 0.03 | 0.66 | 1.37 |
| Foxi1 | 0.49 | 0.06 | 0    | 1.45 | 4.03 |
| Foxi2 | NA   | NA   | NA   | 2.56 | NA   |
| Foxj1 | 2.94 | 0.24 | 1.34 | 1.53 | 0    |
| Foxj2 | 0    | 0    | 3.02 | 0.87 | 2.06 |
| Foxj3 | NA   | 0    | 1.89 | 1.67 | 0.52 |
| Foxk1 | 0.65 | NA   | 1.07 | 1.23 | 0.5  |
| Foxk2 | NA   | 0.76 | 0.49 | 1.5  | 0.14 |
| Foxl1 | 0.51 | 4.52 | 1.68 | 2.03 | 0    |
| Foxl2 | 0    | 1.64 | 0.04 | 2.18 | 0.96 |
| Foxm1 | 0.78 | 1.34 | 0.85 | NA   | 0    |
| Foxn1 | 4.04 | 1.09 | 0    | 1.21 | 2.81 |
| Foxn2 | 0.22 | 0.06 | 1.03 | 0.16 | 2.05 |
| Foxn3 | NA   | 0    | 2.67 | 1.11 | 0    |
| Foxn4 | 0    | NA   | 1.46 | 2.72 | 0    |
| Foxo1 | NA   | 0    | 0.75 | 3.56 | 0    |
| Foxo3 | NA   | 1.21 | 1.41 | 1.69 | 0    |
| Foxo4 | NA   | 0.24 | 1.7  | 3.08 | 2.62 |
| Foxp1 | 0.46 | NA   | 0.06 | 2.47 | 0    |

|          |      |      |      |      |       |
|----------|------|------|------|------|-------|
| Foxp2    | 0.14 | NA   | 0.66 | 0.91 | NA    |
| Foxp3    | 0.57 | 1.69 | 1.57 | NA   | 0     |
| Foxp4    | 0.48 | NA   | 0.83 | 1.08 | 0     |
| Foxq1    | 0.55 | NA   | 0.71 | 0.41 | 0.77  |
| Foxr1    | NA   | NA   | NA   | 0.32 | NA    |
| Foxr2    | NA   | NA   | NA   | 1.09 | NA    |
| Foxred1  | NA   | NA   | 0.13 | 1    | 0     |
| Foxred2  | NA   | 1.06 | 1.35 | 1.42 | 3.01  |
| Foxs1    | NA   | NA   | 0.59 | 0.52 | 0     |
| Fpgs     | 1.09 | 0.04 | 1.13 | 1.66 | 0.17  |
| Fpgt     | 0.88 | 1.97 | 2.3  | NA   | 1.41  |
| Fpr1     | 0.09 | 0.38 | 5.06 | 7.02 | 0     |
| Fpr2     | NA   | 1.74 | 7.13 | NA   | 0     |
| Fpr3     | NA   | 1.52 | 0.42 | 0.75 | 0     |
| Fprl1    | 1.05 | NA   | NA   | NA   | NA    |
| Fra10ac1 | NA   | NA   | 0.52 | 0.44 | NA    |
| Frag1    | 2.02 | NA   | NA   | NA   | NA    |
| Frap1    | 0    | NA   | NA   | NA   | NA    |
| Fras1    | 0.42 | 0.99 | 0.45 | 0.77 | 2.77  |
| Frat1    | 1.46 | 3.46 | 1.4  | 0    | 4.49  |
| Frat2    | 0.18 | 3.92 | 2.28 | 1.19 | 0     |
| Frem1    | NA   | NA   | 1.94 | 2.85 | 0.19  |
| Frem2    | NA   | NA   | 1.96 | 0.05 | 4.7   |
| Frem3    | NA   | NA   | NA   | 0.28 | NA    |
| Freq     | 0.27 | NA   | NA   | NA   | NA    |
| Frg1     | 4.32 | 1.48 | 1.16 | 1.64 | 0     |
| Frk      | 1.11 | 1.22 | 0.62 | 2.98 | 0     |
| Frmd3    | 0    | NA   | 0.88 | 0.06 | 2.84  |
| Frmd4a   | 0    | 0.23 | 1.06 | 1.74 | 12.32 |
| Frmd4b   | 0    | 0.79 | 1.84 | 0.97 | 0     |
| Frmd5    | NA   | NA   | 0.59 | 0.37 | 1.76  |
| Frmd6    | NA   | NA   | 2.14 | 0    | 0     |
| Frmd7    | NA   | NA   | NA   | 1.56 | NA    |
| Frmd8    | NA   | 2.51 | 1.25 | 0    | 0.49  |
| Frmpd1   | 0    | 1.88 | 0.67 | 0    | 0     |
| Frmpd3   | NA   | NA   | 1.83 | 1.6  | 2.08  |
| Frmpd4   | NA   | NA   | NA   | 1.49 | NA    |
| Frrs1    | NA   | NA   | 1.93 | 2.57 | NA    |
| Frrs11   | NA   | NA   | 0    | 1.59 | NA    |
| Frs2     | 1    | 1.79 | 1.05 | 0.4  | 1.32  |
| Frs3     | 0    | 1.14 | 0    | 1.47 | 4.84  |

|        |      |      |      |      |       |
|--------|------|------|------|------|-------|
| Fry    | NA   | 0.09 | 0.91 | 0    | 0.66  |
| Fryl   | NA   | 0.01 | 0.89 | 0    | 2.24  |
| Frzb   | 1.46 | 1.62 | 0.16 | 0    | 2.95  |
| Fscb   | NA   | NA   | NA   | 0    | NA    |
| Fscn1  | 0.73 | 1.41 | 0.72 | 1.76 | 0     |
| Fscn2  | 0    | 3.47 | 0.09 | 2.26 | 0     |
| Fscn3  | 0    | 1.64 | 2.41 | 0.26 | 4.91  |
| Fsd1   | 2.98 | 1.13 | 2.19 | 0    | 10.13 |
| Fsd11  | NA   | NA   | NA   | 0.14 | NA    |
| Fsd2   | NA   | NA   | 0.29 | 0.74 | 0.33  |
| Fshb   | 0    | 0.25 | 0    | 1.13 | 1.43  |
| Fshr   | 2.3  | 0    | 0.87 | 1.15 | 0.17  |
| Fsip1  | 1.54 | NA   | 1.28 | 6.55 | NA    |
| Fsip2  | 0.56 | NA   | NA   | 0.68 | NA    |
| Fst    | 0.4  | 1.26 | 1.4  | NA   | 0     |
| Fstl1  | 0.07 | 0.79 | 0.82 | NA   | 0.02  |
| Fstl3  | 0.44 | 3.76 | 1.68 | 0    | 3.8   |
| Fstl4  | NA   | 2.4  | 0.35 | 0    | 6.89  |
| Fstl5  | 3.75 | NA   | 0.95 | 3.88 | 2.08  |
| Fted   | 0.22 | 2.38 | 1.27 | 0.71 | 1.57  |
| Fth1   | 0.79 | 0    | 3.66 | 0    | 0     |
| Fth117 | 2.35 | NA   | NA   | 3.54 | NA    |
| Ftmt   | 1.01 | NA   | NA   | 8.11 | NA    |
| Fto    | NA   | 1.74 | 1.02 | 0.55 | 2.17  |
| Ftsj1  | NA   | 0    | 0    | 0.46 | 0     |
| Ftsj2  | 0.34 | 0    | 4.24 | 2.33 | 0     |
| Ftsj3  | 0.01 | 1.12 | 1.09 | 0.96 | 3.04  |
| Ftsjd1 | NA   | NA   | 0.66 | 2.22 | 0     |
| Ftsjd2 | NA   | 0.95 | 1.26 | 4.04 | 0     |
| Ftx    | NA   | NA   | 1.39 | NA   | NA    |
| Fubp1  | 0.59 | 0    | 0.31 | 0.5  | 1.12  |
| Fubp3  | 0.19 | 3.25 | 0.04 | 0.98 | 0     |
| Fuca1  | 9.19 | 2.16 | 2.42 | 1.37 | 0     |
| Fuca2  | NA   | NA   | 2    | 1.01 | 0     |
| Fuk    | 0.15 | NA   | 1.84 | 2.65 | 1.84  |
| Fundc1 | NA   | NA   | 1.27 | 0.75 | 0     |
| Fundc2 | 0.49 | NA   | 1.44 | 0.97 | 0     |
| Fuom   | NA   | NA   | 1.25 | 0.38 | NA    |
| Furin  | 0.54 | 1.69 | 4.21 | 1.55 | 0     |
| Fus    | NA   | 1.63 | 0.11 | 0.03 | 1.48  |
| Fusip1 | 1.18 | NA   | NA   | NA   | NA    |

|        |      |      |      |      |      |
|--------|------|------|------|------|------|
| Fut1   | 3.67 | 2.4  | 2.85 | 0.04 | 0    |
| Fut10  | 0.78 | NA   | 0.92 | 3.47 | 1.28 |
| Fut11  | 0.38 | NA   | 1.65 | NA   | 1.91 |
| Fut2   | 0    | 0.16 | 0.66 | 0.34 | 1.03 |
| Fut4   | 7.74 | 0    | 1.46 | 0    | 4.07 |
| Fut7   | 0    | 0.31 | 1.76 | NA   | 3.34 |
| Fut8   | 0.13 | 0    | 1.39 | 3.76 | 2.67 |
| Fut9   | 1    | 0.62 | 1.74 | 2.04 | 1.68 |
| Fuz    | NA   | 0    | 0.66 | 1.5  | 0.7  |
| Fvt1   | 0.24 | NA   | NA   | NA   | NA   |
| Fxc1   | 2.4  | NA   | NA   | NA   | 0    |
| Fxn    | NA   | 0    | 1.1  | 0    | 0.32 |
| Fxr1   | NA   | 0    | 0.43 | NA   | 0.28 |
| Fxr2   | NA   | 1.21 | 0.34 | 1.1  | 0.61 |
| Fxyd1  | 0.31 | 2.24 | 2.03 | 0.73 | 2.35 |
| Fxyd2  | 0.1  | 0.74 | 1.24 | 0.91 | 1.32 |
| Fxyd3  | 1.7  | 0.55 | 0.31 | NA   | 6.14 |
| Fxyd4  | 0    | NA   | 0.56 | 1.28 | 0.56 |
| Fxyd5  | 0.7  | 3.57 | 0.83 | NA   | 8.35 |
| Fxyd6  | 0.96 | 0.9  | 1.1  | 0.91 | 1.84 |
| Fxyd7  | 0.75 | 0    | 2.37 | 1.82 | 0    |
| Fyb    | 1.04 | 0.01 | 5.3  | 4.72 | 2.37 |
| Fyco1  | 0    | 0    | 1.14 | 0    | 1.68 |
| Fyn    | 0    | 0    | 2.74 | 0.55 | 5.24 |
| Fyttd1 | NA   | NA   | 1.81 | 1.62 | 0.06 |
| Fzd1   | 0.57 | 1.23 | 1.08 | 1.72 | 0.59 |
| Fzd10  | 3.54 | 1.04 | 0.78 | 1.26 | 0    |
| Fzd2   | 0    | 1.42 | 0.98 | 2.33 | 0    |
| Fzd3   | 1.95 | 1.84 | 0.34 | 2.75 | 1.31 |
| Fzd4   | 0.63 | 0.94 | 0.86 | 2.43 | 0    |
| Fzd5   | 0    | 0.8  | 1.2  | 2.62 | 0    |
| Fzd6   | 0    | 0.74 | 1.89 | 0    | 0    |
| Fzd7   | 1.04 | 0.23 | 0    | 1.05 | 3.01 |
| Fzd8   | 0.23 | 0.12 | 0.5  | 1.61 | 0    |
| Fzd9   | 0    | 0.81 | 0    | 1.28 | 0    |
| Fzr1   | 0.3  | 2.15 | 0.82 | 1.07 | 0    |
| G0s2   | 0    | 0    | 1.4  | 0    | 0    |
| G2e3   | NA   | NA   | 1.82 | 1.15 | 0    |
| G3bp1  | NA   | 1.03 | 0.02 | 1.9  | 1.78 |
| G3bp2  | NA   | 0.13 | 0.89 | 0.02 | 0    |
| G6pc   | 0    | 2.71 | 0    | 0.82 | 2.07 |

|            |      |      |      |      |      |
|------------|------|------|------|------|------|
| G6pc2      | 1.5  | 1.14 | 7.7  | 1.48 | 2.2  |
| G6pc3      | 0.75 | 0.08 | 1.11 | 1.34 | 0    |
| Gaa        | 0.43 | 1.13 | 1.5  | 0.87 | 0.34 |
| Gab1       | 0.76 | 0.97 | 3.02 | 0.77 | 0    |
| Gab2       | 0    | 1.49 | 0.78 | 2.5  | 0    |
| Gab3       | 0.3  | NA   | 2.53 | 0    | 0.84 |
| Gabarap    | 0    | 2.09 | 0.56 | 0    | 0.45 |
| Gabarap11  | 0.03 | 0.55 | 0.46 | 1.27 | 1.7  |
| Gabarap12  | 0.39 | 2.15 | 1.4  | 0.14 | 5.54 |
| Gabbr1     | 0.39 | 0.9  | 0.74 | 1.88 | 2.24 |
| Gabbr2     | NA   | NA   | NA   | 0    | NA   |
| Gabpa      | 0.33 | 0.92 | 0.32 | 0.5  | 1.4  |
| Gabpb1     | NA   | 0.27 | 1.65 | 0.51 | 0    |
| Gabpb2     | 0    | NA   | 0.61 | 0.87 | NA   |
| Gabra1     | 2.58 | 2.1  | 0.44 | 1.63 | 1.56 |
| Gabra2     | 0    | 0.39 | 0.97 | 0.99 | 1.27 |
| Gabra3     | 3.95 | 1.09 | 0    | 4    | 0.44 |
| Gabra4     | 0.54 | 1.34 | 0    | 0.64 | 0    |
| Gabra5     | 1.29 | 1.35 | 0.95 | 0.99 | 2.1  |
| Gabra6     | 1.15 | 0.44 | 2.58 | 0.75 | 3.3  |
| Gabrb1     | 1.31 | 0.04 | 2.07 | 1    | 1.98 |
| Gabrb2     | 0    | 1.28 | 0.4  | 0.02 | 0    |
| Gabrb3     | 0.42 | 0.06 | 0.71 | 5.96 | 1.89 |
| Gabrd      | 0    | 2.37 | 0.8  | 1.06 | 1.47 |
| Gabre      | 2.53 | 1.55 | 0.9  | 3.8  | 3.32 |
| Gabrg1     | 0.57 | NA   | 0.87 | 0.77 | 0.98 |
| Gabrg2     | 0.3  | 2.14 | 0.82 | 0    | 0.98 |
| Gabrg3     | 0.78 | 1.12 | 1.97 | 2.38 | 1.63 |
| Gabrp      | 1.72 | 1.24 | 0.57 | 3.56 | 2.87 |
| Gabrq      | 0.62 | 1.22 | 1.6  | 2.32 | 2.43 |
| Gabrr1     | 0.76 | 1.12 | 0.81 | 4.24 | 2.19 |
| Gabrr2     | 0    | 2.64 | 3.38 | 0.91 | 3.06 |
| Gabrr3     | NA   | NA   | NA   | 0.71 | NA   |
| Gad1       | 0.42 | 1.2  | 0    | 1.56 | 2.83 |
| Gad2       | 0    | 0.38 | 0.67 | 3.63 | 0    |
| Gadd45a    | 0.19 | 1.04 | 0.45 | 0.03 | 0    |
| Gadd45b    | 0.14 | 0.01 | 1.98 | 2.3  | 0    |
| Gadd45g    | 0.67 | 0.16 | 1.2  | 1.6  | 0.03 |
| Gadd45gip1 | 0    | 0.81 | 1.82 | 0    | 1.2  |
| Gadl1      | 2.13 | NA   | 1.76 | 1.28 | NA   |
| Gak        | 0.24 | 0    | 0.22 | 2.24 | 1.67 |



|         |      |      |      |       |      |
|---------|------|------|------|-------|------|
| Gal     | 2.56 | 2.43 | 1.21 | 3.13  | 0    |
| Gal3st1 | 1.07 | 2.31 | 2.17 | 0.9   | 0    |
| Gal3st2 | NA   | NA   | 0.32 | NA    | NA   |
| Gal3st3 | NA   | NA   | NA   | 0.55  | NA   |
| Gal3st4 | NA   | 3.89 | 1.21 | 0.48  | 1.14 |
| Galc    | 0    | 0    | 0.68 | 0.86  | 0    |
| Gale    | 0.24 | 0.4  | 1.71 | 1.08  | 0    |
| Galk1   | 0.07 | 2.71 | 1.68 | 0.82  | 1.19 |
| Galk2   | 0.01 | 2.24 | 1.96 | 0.27  | 1.05 |
| Galm    | 0.59 | NA   | 2.01 | 0.63  | 0    |
| Galns   | 0    | 0.05 | 1.13 | 2.46  | 2.67 |
| Galnt1  | 0    | 2.8  | 2.91 | 0.67  | 4.11 |
| Galnt10 | 0.18 | 1.18 | 1.76 | 3.1   | 0.26 |
| Galnt11 | 0.49 | 0.76 | 0.81 | 0.12  | 2.1  |
| Galnt12 | 1.57 | 0    | 2.09 | 0.06  | 1.82 |
| Galnt13 | 4.1  | NA   | 0.47 | 3.5   | 0    |
| Galnt14 | 2.16 | 3.83 | 0.83 | 1.09  | 7.59 |
| Galnt15 | NA   | NA   | 0.94 | 1.38  | NA   |
| Galnt16 | NA   | NA   | 0.67 | 0.53  | NA   |
| Galnt18 | NA   | NA   | 0.61 | 2.51  | NA   |
| Galnt2  | 0.86 | 3.25 | 0.6  | 0.02  | 0.66 |
| Galnt3  | 0.49 | 0    | 0.52 | 0     | 1.04 |
| Galnt4  | 0.54 | NA   | 0.71 | 0.87  | 1.33 |
| Galnt5  | 0.42 | NA   | NA   | 1.12  | NA   |
| Galnt6  | 0.65 | 0    | 3.69 | 1.01  | 0    |
| Galnt7  | 0.25 | 0.76 | 1.69 | 0     | 1.48 |
| Galnt9  | 0.55 | NA   | 1.32 | 1.74  | 13.2 |
| Galntl1 | 1.32 | NA   | NA   | NA    | 3.49 |
| Galntl2 | 1.21 | NA   | NA   | NA    | 1.35 |
| Galntl4 | 3.36 | NA   | NA   | NA    | 0    |
| Galntl5 | NA   | NA   | 0    | 14.43 | 2.15 |
| Galntl6 | NA   | NA   | 1.22 | 0.62  | NA   |
| Galp    | 2.56 | NA   | NA   | 2.23  | NA   |
| Galr1   | 1.98 | 0.75 | 0.42 | 2.89  | 1.15 |
| Galr2   | 0.39 | 2.61 | 3.29 | 3.49  | 3.27 |
| Galr3   | 1.01 | 2    | 1.17 | NA    | 0    |
| Galt    | 0.12 | 0    | 1.44 | 3.27  | 4.46 |
| Gamt    | 0.24 | 0    | 2.21 | 1.73  | 2.46 |
| Gan     | 1.64 | 1.91 | 2.18 | 0     | 0    |
| Ganab   | 5.28 | 0    | 1.27 | 0     | 0    |
| Ganc    | NA   | NA   | 1.1  | 1.01  | 0    |

|         |       |      |      |      |      |
|---------|-------|------|------|------|------|
| Gap43   | 1.35  | 0    | 3.68 | 1.03 | 2.46 |
| Gapdh   | NA    | 0    | 0.43 | 2.21 | 0    |
| Gapdhs  | NA    | 0.69 | 0.29 | 3.39 | 0    |
| Gapt    | NA    | NA   | NA   | 1.42 | NA   |
| Gapvd1  | NA    | 0.89 | 1.64 | 4.85 | 0    |
| Gar1    | NA    | 2.58 | 3.16 | 1.01 | 2.29 |
| Garem   | NA    | 1.65 | 0.68 | 0    | NA   |
| Gareml  | NA    | NA   | 2.47 | 1.17 | NA   |
| Garn1   | 2.05  | NA   | NA   | NA   | NA   |
| Garn3   | 0.51  | 1.17 | 2.35 | 0    | 0    |
| Gars    | 0.68  | 1.53 | 2.47 | 0    | 2.54 |
| Gart    | 0.05  | 0.53 | 0.05 | 1.34 | 0.25 |
| Gas1    | 1.59  | 0.09 | 1.15 | 0.89 | 1.26 |
| Gas2    | 0.78  | 0.99 | 1.39 | 0.3  | 1.94 |
| Gas2l1  | 1.25  | 1.4  | 0.98 | 0.8  | 0.63 |
| Gas2l2  | NA    | NA   | 0.19 | 1.84 | NA   |
| Gas2l3  | 0     | NA   | 4.26 | 0.06 | 1.04 |
| Gas5    | 0.51  | NA   | 1.89 | 0    | 0    |
| Gas6    | 0.4   | 1.64 | 2.78 | 3.56 | 0.49 |
| Gas7    | 0.67  | 0    | 1.94 | 4.58 | 0.09 |
| Gas8    | 0.51  | 0.85 | 0    | NA   | 0    |
| Gast    | 10.31 | 1.39 | 2.91 | 1.7  | 0    |
| Gata1   | 0.62  | 0.71 | 1.63 | 1.31 | 1.27 |
| Gata2   | 0.83  | 0.06 | 1.1  | 0.7  | 1.32 |
| Gata3   | 6.94  | 0    | 1.98 | 0.8  | 2.07 |
| Gata4   | 0.89  | 0.28 | 0.62 | 0.71 | 1.65 |
| Gata5   | 0.48  | NA   | 0.54 | 1.11 | 0    |
| Gata6   | 0.09  | 0.35 | 1.94 | 0.21 | 0    |
| Gatad1  | NA    | 0.1  | 1.7  | 1.07 | 2.3  |
| Gatad2a | NA    | 0    | 2.28 | 1.28 | 0.71 |
| Gatad2b | NA    | NA   | 0.61 | 1.08 | 1.42 |
| Gatc    | NA    | 0.74 | 1.75 | 2.37 | 0    |
| Gatm    | 0     | 2.79 | 0.81 | 1.62 | 0.16 |
| Gats    | 1.07  | NA   | NA   | NA   | NA   |
| Gatsl2  | NA    | NA   | NA   | 1.18 | NA   |
| Gatsl3  | NA    | NA   | 2.57 | 0    | NA   |
| Gba     | 0     | NA   | NA   | 1.09 | NA   |
| Gba2    | 0.87  | NA   | 1.29 | 0    | 3.03 |
| Gbas    | 0     | 0.98 | 1.33 | 1.76 | 0    |
| Gbe1    | 0     | 0.96 | 2.09 | 0.55 | 0    |
| Gbf1    | 0.09  | 0    | 2.2  | 0    | 1.25 |

|        |      |      |      |      |      |
|--------|------|------|------|------|------|
| Gbgt1  | 0    | NA   | 3.2  | 1.82 | 1.71 |
| Gbl    | 0    | NA   | NA   | NA   | NA   |
| Gbp1   | 2.53 | NA   | NA   | NA   | 0    |
| Gbp2   | 0    | 0.19 | 2.73 | 0.81 | 0.02 |
| Gbp3   | NA   | NA   | 1.52 | 0    | 0.14 |
| Gbp4   | 0    | NA   | NA   | 1.85 | NA   |
| Gbp5   | 0    | NA   | NA   | 1.03 | NA   |
| Gbp6   | NA   | NA   | 0.37 | NA   | NA   |
| Gbp7   | NA   | NA   | NA   | 0.4  | NA   |
| Gbx1   | NA   | 2.83 | 2.03 | 1.36 | 1.71 |
| Gbx2   | 0.75 | 4.4  | 1.88 | 0    | 0    |
| Gc     | 0.11 | 2.53 | 0.96 | 4.75 | 8.61 |
| Gca    | 0.26 | 0.73 | 2.38 | 0.76 | 0    |
| Gcat   | 0    | 0    | 1.76 | 2.26 | 0.09 |
| Gcc1   | 0.68 | 1.27 | 0.38 | 0    | 0    |
| Gcc2   | NA   | 0    | 0.69 | 0    | 0    |
| Gcdh   | 1.08 | 0    | 1.6  | 0.42 | 0    |
| Gcet2  | 1.96 | NA   | NA   | NA   | 0.02 |
| Gcfc2  | NA   | 0.89 | 1.44 | 0.71 | NA   |
| Geg    | 0.63 | 1.86 | 3.59 | 2.31 | 7.04 |
| Gcgr   | 2.85 | 1.87 | 0.21 | 0.65 | 3.22 |
| Gch1   | 0    | 0.17 | 2.32 | 0.53 | 0    |
| Gchfr  | NA   | 1.89 | 0    | 0.67 | 0    |
| Gck    | 2.32 | 1.62 | 0.71 | 0    | 2.91 |
| Gckr   | 1.97 | 2.04 | 1.1  | 0.85 | 1.69 |
| Gclc   | 0    | 1.1  | 2.15 | 1.39 | 2.84 |
| Gclm   | 0.99 | 2.88 | 1.23 | 0.95 | 1.94 |
| Gcm1   | 0.87 | 0.78 | 0.1  | 1.15 | 0.65 |
| Gcm2   | 0.69 | 0    | 0.43 | 1.77 | 1.21 |
| Gcn111 | 0.38 | 0    | 1.11 | 0    | 2.89 |
| Gcn512 | 0.43 | NA   | NA   | NA   | NA   |
| Gcnt1  | 0    | 0    | 2.4  | 0.11 | 2.06 |
| Gcnt2  | 0    | 0.04 | 0.56 | 2.62 | 0    |
| Gcnt3  | 0.39 | 0.82 | 0.71 | 1.26 | 3.31 |
| Gcnt4  | NA   | NA   | NA   | 0    | NA   |
| Gcnt7  | NA   | NA   | 0.58 | 1.16 | 3.07 |
| Gcom1  | NA   | NA   | NA   | NA   | 0.49 |
| Gcs1   | 0.08 | NA   | NA   | NA   | NA   |
| Gesam  | NA   | NA   | 0.09 | 1.05 | NA   |
| Gesh   | NA   | NA   | NA   | NA   | 0    |
| Gda    | 0.29 | NA   | 2.07 | 0    | 1.66 |

|         |      |      |      |      |      |
|---------|------|------|------|------|------|
| Gdap1   | 0    | 0.95 | 0.7  | 0.36 | 0.45 |
| Gdap111 | 0.31 | 1.77 | 1.34 | 3.22 | 0    |
| Gdap2   | 1.76 | 0    | 0.66 | 0.12 | 0    |
| Gde1    | NA   | 1.5  | 0.59 | 1.21 | 2.35 |
| Gdf1    | 2.3  | NA   | NA   | NA   | NA   |
| Gdf10   | 0.77 | 2.05 | 2.62 | 0.18 | 5.46 |
| Gdf11   | 4.72 | 0.02 | 0    | 0    | 0.61 |
| Gdf15   | 0.54 | 0.63 | 2.36 | 0.55 | NA   |
| Gdf2    | 1.24 | 2.59 | 2.1  | 5.38 | 4.44 |
| Gdf3    | 1.13 | 0.53 | 0.01 | 0.96 | 2    |
| Gdf5    | 1.88 | 1.76 | 2.11 | NA   | 3.61 |
| Gdf6    | 0    | NA   | NA   | 4.17 | NA   |
| Gdf7    | 1.3  | NA   | NA   | 2.34 | NA   |
| Gdf8    | 1.38 | NA   | NA   | NA   | NA   |
| Gdf9    | 2.59 | 1.3  | 0.45 | 0.83 | 0    |
| Gdi1    | 0.11 | 1.6  | 1.26 | 0.28 | 2.71 |
| Gdi2    | 0    | 0.76 | 1.46 | 1.46 | 0    |
| Gdnf    | 1.02 | 1.29 | 0.29 | 0.89 | 2.27 |
| Gdpd1   | NA   | NA   | 1.13 | 1.66 | 0    |
| Gdpd2   | 1.96 | 2.19 | 2.17 | 0.34 | 1.71 |
| Gdpd3   | NA   | 0.07 | 0.35 | 0.06 | 0    |
| Gdpd4   | NA   | NA   | NA   | 1.14 | NA   |
| Gdpd5   | NA   | 2.13 | 1.77 | 1.49 | 3.84 |
| Gdpgp1  | NA   | NA   | NA   | 0.5  | NA   |
| Gem     | 0    | 1.97 | 1.37 | 7.38 | 0    |
| Gemin2  | NA   | 0.96 | 0.33 | 0.73 | NA   |
| Gemin4  | 0.34 | 0    | 3.24 | 3.23 | 2.78 |
| Gemin5  | 0    | NA   | 0.36 | 2.68 | 1.6  |
| Gemin6  | 0    | 0.41 | 1.12 | 0.78 | 4.24 |
| Gemin7  | 1.46 | 2.89 | 4.62 | 1.17 | 0.91 |
| Gemin8  | NA   | 0.1  | 0.43 | 0.51 | 0.53 |
| Gen1    | NA   | NA   | 2.65 | 0.44 | 0.06 |
| Get4    | NA   | NA   | 2.1  | 0.22 | NA   |
| Gfap    | 0.66 | 0.93 | 0.11 | 0    | 0    |
| Gfer    | 1.35 | 1.22 | 1.1  | NA   | 0.94 |
| Gfi1    | 0.66 | 0    | 2.05 | 2.28 | 3.27 |
| Gfi1b   | 2.46 | 0    | 0.68 | 1.12 | 0.85 |
| Gfm1    | NA   | 0.9  | 0.67 | 0.47 | 1.23 |
| Gfm2    | NA   | NA   | 0.72 | 0.45 | 0    |
| Gfod1   | NA   | 0.95 | 2.14 | 2.36 | 0    |
| Gfod2   | NA   | 2.69 | 1.52 | 3.9  | 0    |

|        |      |      |      |      |      |
|--------|------|------|------|------|------|
| Gfpt1  | 0.72 | 0.87 | 1.53 | 0    | 0    |
| Gfpt2  | 0.68 | 1.81 | 0.47 | 1.62 | 0    |
| Gfra1  | 1.7  | 1.22 | 1.16 | 0    | 0    |
| Gfra2  | 2.41 | 0.79 | 0.69 | 1.51 | 0    |
| Gfra3  | 1.77 | 1.83 | 2.02 | 0.72 | NA   |
| Gfra4  | 1.99 | 0.91 | 3.87 | 1.21 | 5.75 |
| Gfral  | NA   | NA   | NA   | 1.63 | NA   |
| Gga1   | 0    | 0.84 | 0.35 | 1.52 | 1.01 |
| Gga2   | 0.03 | 0.07 | 2.86 | 2.67 | 0    |
| Gga3   | 0.74 | 0    | 3.91 | 3.16 | 0.63 |
| Ggact  | NA   | NA   | 3.91 | 1.59 | NA   |
| Ggct   | NA   | 1.2  | 0.07 | 0.13 | 2    |
| Ggcx   | 0    | 3.84 | 0.16 | 0.07 | 0.16 |
| Ggh    | 1.32 | 0    | 0.28 | 1.03 | 0    |
| Ggn    | 0    | NA   | 2.71 | 0.75 | 6.85 |
| Ggnbp1 | NA   | NA   | NA   | 1.01 | NA   |
| Ggnbp2 | NA   | 0.58 | 1.46 | 0.26 | 1.56 |
| Ggps1  | 0.02 | 2.09 | 0.88 | 0.72 | 0    |
| Ggt1   | 0    | 0.52 | 0.17 | NA   | 0.08 |
| Ggt5   | NA   | 0.5  | 2.73 | 1.36 | 0    |
| Ggt6   | NA   | NA   | 6.27 | 0.63 | 0    |
| Ggt7   | NA   | NA   | 1.42 | 0.47 | 0.85 |
| Ggta1  | NA   | NA   | NA   | NA   | 1.08 |
| Ggtl3  | 0.76 | NA   | NA   | NA   | NA   |
| Ggtla1 | 0    | NA   | NA   | NA   | NA   |
| Ghdc   | NA   | NA   | 0.9  | 1.21 | 8.56 |
| Ghitm  | 3.23 | 2.29 | 0.63 | 1.34 | 0    |
| Ghr    | 1.75 | 1.7  | 0.9  | 1.04 | 3.39 |
| Ghrh   | 1.29 | 2.02 | 1.74 | 3.16 | 3.73 |
| Ghrhr  | 0.28 | 1.49 | 0    | 1.19 | 0    |
| Ghrl   | 1.56 | NA   | 2.38 | 1.57 | 5.28 |
| Ghsr   | 0.85 | 0.7  | 4.1  | 1    | 0    |
| Gid4   | NA   | 1.86 | 0.7  | 2.43 | NA   |
| Gid8   | NA   | 0.19 | 0.95 | 0    | NA   |
| Gif    | 0.7  | 2.35 | 1.5  | 0.54 | 3.56 |
| Gigyf1 | NA   | NA   | 2.93 | 0    | 1.55 |
| Gigyf2 | NA   | 0.53 | 0.39 | 0    | 0    |
| Gimap1 | NA   | NA   | 1.27 | 1.29 | NA   |
| Gimap4 | NA   | 0.09 | 0.3  | 1.76 | 0.66 |
| Gimap5 | NA   | 0    | 2.23 | 1.49 | 2.58 |
| Gimap6 | NA   | 0    | 0    | 3.52 | 2.89 |

|        |      |      |      |      |       |
|--------|------|------|------|------|-------|
| Gimap7 | NA   | NA   | 0.53 | 0.79 | 0     |
| Gimap8 | NA   | NA   | 0.39 | 1.92 | 0     |
| Gin1   | NA   | 2.37 | 1.04 | 1.05 | 4.05  |
| Ginm1  | NA   | NA   | 1.42 | 0.37 | NA    |
| Gins1  | NA   | 0.86 | 0.96 | 0    | 1.44  |
| Gins2  | NA   | 0.4  | 1.82 | NA   | 2.93  |
| Gins3  | NA   | 0.19 | 1.89 | 0.87 | 0     |
| Gins4  | NA   | 2.02 | 0.73 | 0    | 2.83  |
| Gip    | 1.83 | 1.21 | 1.18 | 0.99 | 3.26  |
| Gipc1  | NA   | 0.23 | 1.26 | 1.28 | 0     |
| Gipc2  | NA   | 2.22 | 2.94 | 0.98 | 1.06  |
| Gipc3  | NA   | NA   | 3.28 | 0.87 | 0     |
| Gipr   | NA   | 2.6  | 1.57 | 1.01 | 0     |
| Git1   | NA   | 1.91 | 0.99 | 1.28 | 1.51  |
| Git2   | 0    | 0.99 | 1.04 | 0    | 0.88  |
| Gja1   | 0.97 | 1.87 | 0.91 | 1.18 | 0     |
| Gja10  | 3.89 | NA   | 0.91 | 1.47 | NA    |
| Gja12  | 0.9  | NA   | NA   | NA   | NA    |
| Gja3   | 0.24 | 1.65 | 0.1  | 1.18 | 0     |
| Gja4   | 3.34 | 1.11 | 1.7  | 0    | 0     |
| Gja5   | 1.14 | 2.41 | 1.14 | 1.09 | 5.19  |
| Gja7   | 0.46 | NA   | NA   | NA   | NA    |
| Gja8   | 0.73 | 3.45 | 0.41 | 3.3  | 0     |
| Gja9   | 0.52 | NA   | NA   | NA   | NA    |
| Gjb1   | 0    | 2.24 | 0.32 | 2.32 | 1.54  |
| Gjb2   | 0    | NA   | 3.6  | 0.41 | 4.54  |
| Gjb3   | 1.42 | 1.18 | 1.81 | 4.74 | 0     |
| Gjb4   | 0.92 | 0.65 | 0    | 4.37 | 5.61  |
| Gjb5   | 1.36 | 2.34 | 1.78 | 0.12 | 2.34  |
| Gjb6   | 1.24 | NA   | 0.62 | 0.16 | 0     |
| Gjc1   | 2.37 | 0.34 | 1.37 | 3.23 | 1.15  |
| Gjc2   | NA   | 1.26 | 0    | 1.19 | 0     |
| Gjc3   | NA   | NA   | NA   | 1.74 | NA    |
| Gjd2   | NA   | 1.27 | 2.13 | 1.75 | 1.09  |
| Gjd3   | NA   | NA   | NA   | 1.09 | NA    |
| Gjd4   | NA   | NA   | 1.71 | 0    | 2.73  |
| Gje1   | 1.1  | NA   | NA   | NA   | NA    |
| Gk2    | 4.81 | 1.41 | 2.22 | 0.02 | 0     |
| Gk5    | NA   | NA   | 2.03 | 0.18 | 1.21  |
| Gkap1  | 4.09 | NA   | 0.44 | 1.19 | 2.11  |
| Gkn1   | 2.63 | 1.15 | 0.26 | 0.7  | 11.09 |

|          |      |      |      |      |      |
|----------|------|------|------|------|------|
| Gkn2     | NA   | NA   | 4.95 | 1.58 | 1.08 |
| Gla      | 0.65 | 0    | 0.69 | 0.58 | 0    |
| Glb1     | 0.28 | 0.45 | 1.11 | 0.95 | 0    |
| Glb11    | 0.04 | 0.55 | 1.08 | 2.25 | 0.19 |
| Glb112   | NA   | 2.08 | 0.49 | 0    | 0    |
| Glb113   | NA   | NA   | 1.11 | 2.01 | NA   |
| Glcci1   | 0.79 | NA   | 1.73 | 0.03 | 0    |
| Glce     | 0.06 | 0.81 | 1.29 | 0.97 | 1.32 |
| Gldc     | 2.1  | 0.93 | 0.86 | 1.33 | 0    |
| Gldn     | NA   | NA   | NA   | 0    | NA   |
| Gle1     | NA   | 0.98 | 0.87 | 1.17 | 0.81 |
| Gle11    | 1.65 | NA   | NA   | NA   | NA   |
| Glg1     | 0.75 | 0    | 1.09 | 0    | 0    |
| Gli1     | NA   | 1.12 | 0.88 | 1.87 | 0    |
| Gli2     | 0.45 | 0.37 | 0.89 | 1.71 | 1.72 |
| Gli3     | 0.9  | 1.26 | 1.15 | 0.24 | 0    |
| Glipr1   | 0    | 0.92 | 0.86 | NA   | 0    |
| Glipr111 | NA   | NA   | 1.62 | 2.05 | 0    |
| Glipr112 | NA   | NA   | NA   | 0    | NA   |
| Glipr2   | NA   | NA   | 1.02 | 2    | 1.28 |
| Glis1    | 2.11 | NA   | 7.88 | 1.38 | 0.4  |
| Glis2    | 0.37 | NA   | 0.75 | 0.74 | 2.66 |
| Glis3    | NA   | NA   | 0.27 | 0.69 | 0.2  |
| Glmn     | 0.41 | 1.25 | 2.72 | 0.68 | 0    |
| Glo1     | 0.38 | 0.24 | 1.75 | 1.11 | 0    |
| Glod4    | NA   | 2.76 | 0.73 | 0.82 | 3.07 |
| Glod5    | NA   | NA   | 0.7  | 0    | 0    |
| Glp1r    | 0.9  | 2.1  | 0    | 0    | 0    |
| Glp2r    | 0.89 | NA   | NA   | 0    | NA   |
| Gla1     | 0    | 1.24 | 1.7  | 0.82 | 0    |
| Gla2     | 1.22 | 2.2  | 0    | 0.55 | 2.57 |
| Gla3     | 0.64 | 0.1  | 1.67 | 0.25 | 2.82 |
| Gla4     | NA   | NA   | NA   | 0.65 | NA   |
| Glr1     | 0.91 | 0.65 | 0    | 3.98 | 3.19 |
| Glr2     | NA   | 0    | 1.55 | 0    | 0.01 |
| Glr3     | 0.46 | 0    | 0.84 | 1.27 | 0    |
| Glr4     | NA   | 0.59 | 0.42 | 1.77 | 0.17 |
| Glr5     | NA   | 1.95 | 3.75 | 0.9  | 0    |
| Gls      | 1.65 | 0.33 | 0.88 | 0    | 0.61 |
| Gls2     | 0    | 0    | 0    | 0.28 | 0.47 |
| Glt1d1   | NA   | NA   | NA   | 0.43 | NA   |

|          |      |      |      |      |      |
|----------|------|------|------|------|------|
| Glt25d1  | 0.06 | NA   | NA   | NA   | 1.73 |
| Glt25d2  | 4.22 | NA   | NA   | NA   | 3.16 |
| Glt6d1   | NA   | NA   | NA   | 1.64 | NA   |
| Glt8d1   | NA   | 0.61 | 0.83 | 0    | 0    |
| Glt8d2   | NA   | 1.69 | 0.49 | 0    | 1.19 |
| Gltp     | 0.73 | 2.12 | 2.78 | 1.03 | 1    |
| Gltpd1   | NA   | 1.44 | 3.49 | 0.52 | 1.02 |
| Gltpd2   | NA   | NA   | NA   | 0.83 | NA   |
| Gltscr1  | 1    | 0    | 3.33 | 1.86 | 0.09 |
| Gltscr11 | NA   | 0.02 | 0.69 | 0    | NA   |
| Gltscr2  | 0    | 0    | 0.76 | 1.27 | 1.97 |
| Glud1    | 0.38 | 1.56 | 1.56 | NA   | 0    |
| Glul     | 1.19 | 0.04 | 3.24 | 1.04 | 0.75 |
| Gluld1   | 2.38 | NA   | NA   | NA   | NA   |
| Glyat    | 0    | 0.97 | 0    | 0.8  | 1.58 |
| Glycam1  | 0    | NA   | NA   | NA   | NA   |
| Glyctk   | NA   | NA   | 0.71 | 0    | 0    |
| Glyr1    | NA   | 1.97 | 2.55 | 0.12 | 1.09 |
| Gm2a     | 1.21 | 1.63 | 0.59 | 0.99 | 2.54 |
| Gmcl1    | NA   | 0.34 | 1    | 1.93 | 0    |
| Gmds     | 0.34 | 0.54 | 0.11 | 0.7  | 0    |
| Gmeb1    | 0.64 | 0.48 | 0.39 | 0.91 | 0    |
| Gmeb2    | 0.57 | 1.49 | 1.09 | 3.52 | 1.38 |
| Gmfb     | 0    | 0    | 2.14 | 0.82 | 0    |
| Gmfg     | 2.01 | 0    | 0.85 | 1.34 | 0.35 |
| Gmip     | 0.7  | 1.22 | 5.19 | 1.86 | 0.18 |
| Gml      | NA   | 1.69 | 3.58 | 0.87 | NA   |
| Gmnn     | 0.01 | 0    | 2.03 | 0.04 | 0    |
| Gmppa    | 0.47 | 0.92 | 0.33 | 0.41 | 0    |
| Gmppb    | 0.67 | 1.39 | 1.12 | 0.82 | 1.79 |
| Gmpr     | 0.98 | 0.52 | 0.96 | 0    | NA   |
| Gmpr2    | 0.44 | 2.42 | 0.02 | 0.39 | 1.28 |
| Gmps     | 0.1  | 0    | 1.51 | 0.06 | 0    |
| Gna11    | 0    | 1.37 | 0.96 | 1.77 | 2.78 |
| Gna12    | 1.24 | 0.09 | 0.18 | 0    | 0.82 |
| Gna13    | 0.01 | 0.9  | 1.39 | 0.78 | 0.46 |
| Gna14    | 3.27 | 1.29 | 0.77 | 1.72 | 1.59 |
| Gna15    | 0.68 | 4.36 | 2.1  | 1.94 | 5.41 |
| Gnai1    | 0.57 | 0.72 | 0.39 | 2.63 | 0    |
| Gnai2    | 0    | 1.76 | 2.74 | 0.19 | 0    |
| Gnai3    | 2.84 | 0    | 3.28 | 1.03 | 0    |



|         |      |      |      |      |       |
|---------|------|------|------|------|-------|
| Gnal    | 0.6  | 0.36 | 0.48 | 0.45 | 0     |
| Gnao1   | NA   | 0.76 | 1.2  | 3    | 1.75  |
| Gnaq    | 0.97 | 0.79 | 0.68 | 0    | 0     |
| Gnas    | 0.09 | 0    | 0.62 | 0    | 0.56  |
| Gnat1   | 1.41 | 1.47 | 0.34 | 0.39 | 5.96  |
| Gnat2   | 0.61 | 2.46 | 0.67 | 1.17 | 2.32  |
| Gnaz    | NA   | 0    | 1.12 | 0.29 | 0     |
| Gnb1    | 0.69 | 1.03 | 0.59 | 0.37 | 0     |
| Gnb11   | 0.22 | 2.12 | 3.52 | NA   | 0     |
| Gnb2    | 0.42 | 2.84 | 2.39 | 0.58 | 0     |
| Gnb211  | NA   | 0    | 1.75 | 0.15 | 0     |
| Gnb3    | 0    | 1.57 | 0.55 | 0.96 | 0     |
| Gnb4    | 0.2  | NA   | 3.37 | 0.68 | 3.24  |
| Gnb5    | 0.28 | 1.65 | 1.8  | 0.86 | 0     |
| Gne     | 0.51 | 0.16 | 2.29 | 1.23 | 0     |
| Gng10   | 0.79 | 0    | 3.14 | NA   | 2.17  |
| Gng11   | 0.83 | 0.84 | 3.28 | 0.39 | 0.69  |
| Gng12   | 0.81 | 0.99 | 0.02 | 0    | 0.59  |
| Gng13   | 1.22 | 1.9  | 0    | NA   | 0     |
| Gng2    | 0.53 | NA   | 0.6  | 0.86 | 2.25  |
| Gng3    | 2.32 | 0    | 1.04 | NA   | 0     |
| Gng4    | 0    | 1.02 | 0.66 | 1.1  | 0     |
| Gng5    | 0.72 | 1.86 | 1.81 | 0    | 3.15  |
| Gng7    | 0.1  | 1.48 | 1.67 | 1.11 | 0.92  |
| Gng8    | 1.17 | NA   | 2.15 | 2.82 | 2.89  |
| Gngt1   | 0.29 | 1.74 | 0.32 | 2.47 | 0     |
| Gngt2   | 0.34 | NA   | 2.55 | NA   | 2.72  |
| Gnl1    | NA   | 1.05 | 2.26 | 1.28 | 0     |
| Gnl2    | 0    | 0.77 | 4.63 | 0.79 | 7.13  |
| Gnl3    | NA   | 1.45 | 1.06 | 1.26 | 5.92  |
| Gnl31   | NA   | 0.67 | 0    | 0.01 | 1.18  |
| Gnmt    | 0.34 | 2.45 | 0.89 | 0    | 2.32  |
| Gnpat   | 0.17 | 3.73 | 1.53 | 1.26 | 2.8   |
| Gnpda1  | 0.06 | 1.38 | 2.46 | NA   | 14.09 |
| Gnpda2  | 0.75 | NA   | 1.87 | 0.68 | 1.45  |
| Gnpnat1 | 0    | NA   | 2.62 | 0.68 | 0     |
| Gnptab  | NA   | 0.09 | 1.8  | 3.25 | 1.22  |
| Gnptg   | NA   | NA   | 0.94 | 0.01 | 2.99  |
| Gnrh1   | NA   | NA   | NA   | 0.67 | NA    |
| Gnrhr   | 0    | 0.85 | 0.83 | 0.88 | 2.2   |
| Gns     | 0.73 | 0    | 0.87 | 1.04 | 0     |

|          |      |      |      |       |      |
|----------|------|------|------|-------|------|
| Golga1   | 0    | 1.35 | 0.74 | 0.87  | 0    |
| Golga2   | 0.65 | 0.89 | 1    | 1.17  | 2.59 |
| Golga3   | 0.09 | 1.37 | 0.43 | 0     | 0    |
| Golga4   | 0    | 0.65 | 1.86 | 2.22  | 0    |
| Golga5   | 0.59 | 1.95 | 2.31 | 0.61  | 1.04 |
| Golga7   | 1    | 3.23 | 4.4  | 1.57  | 5.59 |
| Golga7b  | NA   | NA   | 1.51 | 3.05  | 0.68 |
| Golgb1   | 0.48 | 0.76 | 1.41 | 0     | 1.31 |
| Golim4   | NA   | 0    | 0.89 | 0.72  | 1    |
| Golm1    | NA   | 1.48 | 1.99 | 1.12  | 2.64 |
| Golph2   | 5.52 | NA   | NA   | NA    | NA   |
| Golph3   | 0.3  | 0.72 | 2.51 | 0     | 0.87 |
| Golph3l  | NA   | 1.4  | 1.05 | 0.11  | 0    |
| Golph4   | 0    | NA   | NA   | NA    | NA   |
| Golt1a   | NA   | NA   | 1.63 | 11.37 | 3.51 |
| Golt1b   | NA   | 1.1  | 0.51 | 0.83  | 0    |
| Gon4l    | NA   | 0    | 2.61 | 0     | 1.35 |
| Gopc     | 1.32 | NA   | 0.76 | NA    | 0    |
| Gorab    | NA   | NA   | 0    | 1.35  | 0    |
| Gorasp1  | 0.48 | 1.63 | 1.1  | 1.21  | 1.65 |
| Gorasp2  | 1.01 | 1.08 | 1.98 | 0     | 0    |
| Gosr1    | 0.36 | 0.38 | 1.13 | 0.56  | 0    |
| Gosr2    | 1.08 | 0.74 | 0    | 0.73  | 1.07 |
| Got1     | 0    | 0    | 3.36 | 0.84  | 1.51 |
| Got1l1   | NA   | NA   | 0    | 1.37  | NA   |
| Got2     | 0    | 0.96 | 0.34 | 1.09  | 0    |
| Gp1ba    | 5.08 | 0    | 1.61 | 1.97  | 0    |
| Gp1bb    | 0    | 1.89 | 0.65 | NA    | 0    |
| Gp2      | NA   | 1.63 | 1.2  | 0.63  | 8.29 |
| Gp5      | 3.62 | 0    | 0.79 | 2.36  | 0.21 |
| Gp6      | 0.23 | 2.21 | 2.25 | NA    | 0.03 |
| Gp9      | 0    | 1.41 | 0.81 | 4.82  | 0    |
| Gpa33    | 0.09 | 0    | 0.9  | 1.1   | 0    |
| Gpaa1    | 0.25 | 0.84 | 1.1  | 9.86  | 0.24 |
| Gpam     | 1.2  | NA   | 0    | 0     | 0.12 |
| Gpank1   | NA   | NA   | 0.98 | 0     | NA   |
| Gpat2    | NA   | NA   | 2.67 | 0     | 1.12 |
| Gpatch1  | NA   | 0    | 0    | 0.23  | 0    |
| Gpatch1l | NA   | NA   | 1.71 | 0.45  | NA   |
| Gpatch2  | NA   | 0    | 0.37 | 0     | 0    |
| Gpatch2l | NA   | 0    | 1.72 | 0.3   | NA   |

|         |      |      |      |      |      |
|---------|------|------|------|------|------|
| Gpatch3 | NA   | 1.24 | 0    | 0.02 | 0.92 |
| Gpatch4 | NA   | 1.11 | 1.06 | 1.04 | 0    |
| Gpatch8 | NA   | 0    | 0.33 | 0    | 0.04 |
| Gpbar1  | 1.92 | NA   | NA   | 0.56 | NA   |
| Gpbp1   | NA   | NA   | 1.41 | 0    | 3.72 |
| Gpbp111 | NA   | 1.15 | 2.37 | 1.68 | 6.35 |
| Gpc1    | 0.57 | 0.92 | 1.97 | 0.35 | 0    |
| Gpc2    | 1.83 | NA   | 0.93 | 0.91 | 0.62 |
| Gpc3    | 0.34 | 1.46 | 0.32 | 0.92 | 0    |
| Gpc4    | 2.98 | 0.86 | 1.58 | 1.23 | 1.95 |
| Gpc5    | 0.33 | 1.53 | 1.91 | 0.84 | 0    |
| Gpc6    | 1.84 | NA   | 0.04 | 0    | 1.19 |
| Gpcpd1  | NA   | NA   | 1    | 0.37 | NA   |
| Gpd1    | 1.51 | 0.8  | 2.06 | 0.73 | 2.44 |
| Gpd11   | NA   | 0    | 4.35 | 0.79 | 0    |
| Gpd2    | 0    | 0.68 | 1.69 | 1.02 | 0.35 |
| Gper    | NA   | NA   | NA   | NA   | 1.41 |
| Gpha2   | 1.17 | NA   | 1.12 | 1.58 | 0    |
| Gphb5   | 0    | NA   | NA   | 0.02 | NA   |
| Gphn    | 0.84 | 0    | 1.87 | 0.35 | 0.21 |
| Gpiap1  | 0    | NA   | NA   | NA   | NA   |
| Gpihbp1 | NA   | NA   | 0    | 0    | 1.52 |
| Gpkow   | 0    | 0.54 | 0.85 | 1.01 | 1.99 |
| Gpld1   | 0.81 | 0.08 | 0.88 | 2.28 | 1.85 |
| Gpm6a   | 0.45 | 0.7  | 0.17 | 1.06 | 0.52 |
| Gpm6b   | 0.06 | 0.46 | 0.25 | 0.72 | 0    |
| Gpn1    | NA   | 0.72 | 1.17 | 1.05 | 0    |
| Gpn2    | NA   | 1.47 | 1.42 | 2.08 | NA   |
| Gpn3    | NA   | 4.25 | 0.56 | 0.95 | 6.3  |
| Gpnmb   | 0.89 | 0.68 | 1.34 | 0.59 | 0    |
| Gpr1    | 0.3  | 2.3  | 1.01 | 4.28 | 1.23 |
| Gpr101  | NA   | NA   | 0.12 | 0.95 | NA   |
| Gpr103  | 0.83 | NA   | NA   | NA   | NA   |
| Gpr107  | NA   | 0    | 1.21 | 0.14 | 0    |
| Gpr108  | 0.9  | NA   | 2.12 | 1.04 | 0    |
| Gpr109b | 1.06 | NA   | NA   | NA   | NA   |
| Gpr110  | 0.29 | 1.14 | 0.34 | 0.02 | 0    |
| Gpr111  | NA   | NA   | NA   | 0.89 | NA   |
| Gpr112  | NA   | NA   | NA   | 0.01 | NA   |
| Gpr113  | NA   | NA   | NA   | 0    | NA   |
| Gpr114  | NA   | NA   | 2.37 | 2.31 | 3.69 |

|         |      |      |      |      |      |
|---------|------|------|------|------|------|
| Gpr115  | 0    | NA   | 2.62 | NA   | 1.46 |
| Gpr116  | 0    | 0.91 | 0.55 | 0    | 0    |
| Gpr119  | 0.37 | NA   | NA   | 1.15 | NA   |
| Gpr12   | 0    | 1.31 | 0.88 | 2.23 | 0    |
| Gpr120  | 0.37 | NA   | NA   | NA   | NA   |
| Gpr123  | 0.72 | NA   | 0.63 | 1.17 | 1.08 |
| Gpr124  | 0.67 | 2.6  | 1.37 | 0.35 | 0    |
| Gpr125  | 0.9  | 0.75 | 0.56 | 3.66 | 0    |
| Gpr126  | 0    | 1.24 | 0.77 | 3.06 | 0    |
| Gpr128  | 4.37 | NA   | NA   | 1.29 | NA   |
| Gpr132  | 1.13 | 0.75 | 1.27 | 0    | 0    |
| Gpr133  | 3.63 | NA   | 3.76 | 0    | 1.91 |
| Gpr135  | 0.63 | 1.02 | 0.68 | 0.27 | 2.13 |
| Gpr137  | NA   | 0.4  | 0    | 0.18 | 3.16 |
| Gpr137b | NA   | 1.42 | 1.99 | 3.36 | 0    |
| Gpr137c | NA   | NA   | 0.1  | 1.48 | 1.14 |
| Gpr139  | NA   | NA   | NA   | 0.66 | NA   |
| Gpr141  | 2.18 | NA   | NA   | 0    | NA   |
| Gpr142  | 0.85 | NA   | NA   | 1.17 | NA   |
| Gpr143  | 0.57 | 2.54 | 9.67 | 1.63 | 2.83 |
| Gpr146  | 0.87 | NA   | 0.25 | 1.78 | 0.66 |
| Gpr149  | 0.54 | NA   | NA   | 0.6  | NA   |
| Gpr15   | NA   | 2.74 | 0.01 | 0.6  | 3.76 |
| Gpr150  | 2.56 | NA   | 0    | 0.39 | 2.09 |
| Gpr151  | 0.75 | NA   | NA   | 1.46 | NA   |
| Gpr152  | 2.45 | NA   | NA   | 0.94 | NA   |
| Gpr153  | 2    | 0.1  | 4.01 | 0.04 | 4.85 |
| Gpr155  | 1.78 | NA   | 0.72 | 1.55 | 0    |
| Gpr156  | 0.68 | NA   | NA   | 0.05 | NA   |
| Gpr157  | NA   | NA   | NA   | 0.25 | NA   |
| Gpr158  | 0.16 | NA   | 0    | 2.16 | 2.25 |
| Gpr160  | 0    | NA   | 0.26 | 1.52 | 6.87 |
| Gpr161  | NA   | 0.6  | 1.14 | 3.98 | 0    |
| Gpr162  | NA   | 1.96 | 2.86 | 2.86 | 2.55 |
| Gpr17   | NA   | 0    | 1.89 | 0.31 | 9.6  |
| Gpr171  | 0    | 2.31 | 2.26 | 0    | 4.26 |
| Gpr172b | 3.92 | NA   | NA   | NA   | 1.2  |
| Gpr173  | 0.92 | 1.52 | 0    | 0    | 1.93 |
| Gpr174  | NA   | NA   | 0.55 | 5.22 | 0    |
| Gpr176  | NA   | 2.32 | 2.38 | 0    | 7.66 |
| Gpr179  | NA   | NA   | NA   | 1.05 | NA   |

|         |      |      |       |       |      |
|---------|------|------|-------|-------|------|
| Gpr18   | 1.54 | 0    | 0.21  | 0.1   | 0    |
| Gpr180  | NA   | NA   | 3.06  | 1.93  | 0    |
| Gpr182  | NA   | 2.44 | 1.94  | 2.63  | 0    |
| Gpr183  | NA   | 0    | 2.29  | 4.78  | 0    |
| Gpr19   | 0.45 | 0    | 9.14  | 0     | 0    |
| Gpr20   | 1.34 | 2.51 | 12.34 | 0.94  | 0    |
| Gpr21   | 3.22 | NA   | NA    | 1.97  | NA   |
| Gpr22   | 0    | 1.43 | 1.83  | 15.36 | 0    |
| Gpr23   | 0    | NA   | NA    | NA    | NA   |
| Gpr25   | NA   | 3.93 | 0.21  | 0.67  | 0.45 |
| Gpr26   | 1.55 | NA   | 0.72  | 2.98  | 0    |
| Gpr27   | 0.97 | 0    | 1.26  | 0.99  | 0    |
| Gpr3    | 1.06 | 1.51 | 2.57  | 1.55  | 0.17 |
| Gpr30   | 0    | NA   | NA    | NA    | NA   |
| Gpr34   | 0.14 | NA   | 2.77  | 0.04  | 0    |
| Gpr35   | 0    | 1.96 | 0.54  | 1     | 2.09 |
| Gpr37   | 3.06 | 0.8  | 1.48  | 17.03 | 1.63 |
| Gpr3711 | 1.61 | 0.45 | 0     | 1.97  | 4.98 |
| Gpr39   | 0.55 | 2.25 | 0.61  | NA    | 0    |
| Gpr4    | 1.04 | 1.9  | 0.1   | 0.49  | 3.32 |
| Gpr44   | 0    | NA   | NA    | NA    | 0    |
| Gpr45   | 0.78 | 0.85 | 0.09  | 1.1   | 0.68 |
| Gpr50   | 0.44 | 1.48 | 0.8   | 0.69  | 1.81 |
| Gpr52   | NA   | NA   | NA    | 1.7   | NA   |
| Gpr55   | NA   | NA   | NA    | 4.51  | NA   |
| Gpr56   | 0    | 0    | 0.57  | 1.43  | 1.96 |
| Gpr6    | 1.29 | 0.77 | 0.79  | 1.03  | 3.73 |
| Gpr61   | 0.55 | NA   | 0     | 2.14  | 0    |
| Gpr62   | NA   | NA   | 0     | 1.17  | NA   |
| Gpr63   | 2.94 | 1.24 | 0.42  | 13.74 | 2.04 |
| Gpr64   | 0.07 | 0    | 0.24  | 0.47  | 1.89 |
| Gpr65   | 0.55 | 0    | 2.8   | 1.64  | 0    |
| Gpr68   | 0.57 | 2.41 | 4.82  | 0.72  | 3.86 |
| Gpr75   | 0    | 0.06 | 1.98  | NA    | 2.61 |
| Gpr77   | 0    | NA   | NA    | NA    | NA   |
| Gpr81   | 0    | NA   | NA    | NA    | 2.58 |
| Gpr82   | 2.64 | NA   | NA    | 0.62  | NA   |
| Gpr83   | 1.69 | NA   | 1.45  | 0.02  | 0    |
| Gpr84   | 0.45 | NA   | 3.02  | 0.56  | 0    |
| Gpr85   | 1.84 | 1.99 | 2     | 0     | 1    |
| Gpr87   | 0.89 | 1.2  | 0.64  | 1.96  | 3.89 |

|         |      |      |      |      |      |
|---------|------|------|------|------|------|
| Gpr88   | 0    | 1.78 | 1.33 | 0    | 0    |
| Gpr97   | 0.39 | 0.14 | 1.02 | 0.54 | 0    |
| Gpr98   | NA   | 0.92 | 1.28 | 0    | 0    |
| Gprasp1 | 6.73 | 0    | 2.04 | NA   | 3.91 |
| Gprasp2 | 3.89 | NA   | NA   | 0    | 0    |
| Gprc5a  | NA   | 2.79 | 0    | 1.24 | 2.09 |
| Gprc5b  | 0.47 | 1.32 | 1.25 | 0    | 1.42 |
| Gprc5c  | 1.18 | 1.67 | 1.23 | 0    | 1.47 |
| Gprc5d  | 1.36 | 3.17 | 0.2  | 2.35 | 3.33 |
| Gprc6a  | 0.75 | NA   | 0    | 1.58 | NA   |
| Gprin1  | 1.18 | NA   | 0.47 | 0.92 | 0    |
| Gprin2  | NA   | 0    | 1.04 | 0    | 3.11 |
| Gprin3  | NA   | NA   | 1.39 | 1.65 | NA   |
| Gps1    | 0.29 | 0.07 | 0.27 | 0    | 0    |
| Gps2    | 0.44 | 0    | 2.31 | 0    | NA   |
| Gpsm1   | 1.85 | NA   | 0.5  | 0.72 | 0.29 |
| Gpsm2   | NA   | 0.03 | 1.38 | 0.22 | 0    |
| Gpsm3   | 1.12 | 1.31 | 1.55 | 1.16 | 0    |
| Gpsn2   | 0    | NA   | NA   | NA   | NA   |
| Gpt     | NA   | 2.36 | 3.87 | 1.17 | 0.95 |
| Gpt2    | 0.73 | NA   | 1.73 | 1.27 | 1.19 |
| Gpx1    | 0.42 | 0.77 | 0.92 | 0    | 0    |
| Gpx2    | 0.06 | 1.14 | 0.27 | 0.07 | 6.97 |
| Gpx3    | 0    | 1.55 | 4.8  | 6.76 | 0    |
| Gpx4    | 0.85 | 0.3  | 0.53 | 0    | 0    |
| Gpx5    | 0.88 | 1.71 | 0.33 | 0    | 1.11 |
| Gpx6    | 0    | NA   | NA   | 0.73 | NA   |
| Gpx7    | 2.79 | 1.11 | 0.77 | 2.96 | 3.2  |
| Gpx8    | NA   | NA   | 0.79 | 0    | 0    |
| Gramd1a | NA   | NA   | 5.21 | 3.45 | 0    |
| Gramd1b | NA   | 1.03 | 2.15 | 0    | 2.26 |
| Gramd1c | NA   | 0    | 1.2  | 0.28 | 3.49 |
| Gramd2  | NA   | NA   | NA   | 2.79 | NA   |
| Gramd3  | NA   | 0    | 2.21 | 0.35 | 1.87 |
| Gramd4  | NA   | 0    | 2.09 | 2.44 | 2.62 |
| Grap    | 0.5  | 0.67 | 0.18 | 1.93 | 1.68 |
| Grap2   | 0.93 | 0.2  | 0.93 | 0.48 | 0    |
| Grasp   | 0.09 | NA   | 0.05 | 0.31 | 2.21 |
| Grb10   | 0.74 | 1.9  | 0.42 | 0    | 2.36 |
| Grb14   | 0.27 | 1.01 | 0.51 | 0.64 | 0    |
| Grb2    | 0.32 | 0    | 0.81 | 1.49 | 0    |

|         |      |      |      |      |      |
|---------|------|------|------|------|------|
| Grb7    | 1.21 | 2.23 | 0.07 | 1.28 | 2.59 |
| Greb1   | 0    | 0    | 0.39 | 0.7  | 9.69 |
| Greb11  | NA   | 1.01 | 0    | 1.43 | NA   |
| Grem1   | 1.22 | 1    | 4.04 | 0    | 3.1  |
| Grem2   | 0    | 1.87 | 0.44 | 1.77 | 0    |
| Grhl1   | NA   | NA   | 2.56 | 1.15 | NA   |
| Grhl2   | NA   | 0.93 | 0    | 0    | 1.75 |
| Grhl3   | NA   | NA   | 0.71 | 2.25 | 0    |
| Grhpr   | 0.39 | 0.03 | 0    | 1.81 | 0    |
| Gria1   | 0.72 | 0.82 | 0.94 | 0    | 0    |
| Gria2   | 0.88 | 0.34 | 0.38 | 1.29 | 0.63 |
| Gria3   | 0.61 | 0.17 | 1.76 | 1.15 | 7.96 |
| Gria4   | 1.53 | 1.01 | 0.51 | 1.31 | 0    |
| Grid1   | 0.76 | NA   | 0.05 | 0.11 | 2.47 |
| Grid2   | 0    | 0.94 | 0.01 | 3.4  | 0    |
| Grik1   | 0.29 | 0.43 | 0.81 | 0    | 2.04 |
| Grik2   | 1.94 | 0.69 | 0.48 | 3.28 | 0    |
| Grik3   | 0    | 0    | 0.61 | 1.13 | 0    |
| Grik4   | 0    | 1.01 | 0.93 | 2.09 | 0    |
| Grik5   | 0.79 | 0    | 1.9  | 0.93 | 0    |
| Grin1   | 1.48 | 0.57 | 0.03 | 0.44 | 0    |
| Grin2a  | 0    | 1.31 | 1.36 | 2.75 | 2.92 |
| Grin2b  | 0.35 | 0    | 0.07 | 0    | 3.29 |
| Grin2c  | 1.48 | 2.29 | 0.83 | 1.94 | 3.38 |
| Grin2d  | 0.51 | 1.06 | 1.21 | 5.52 | 0    |
| Grin3a  | 3.07 | NA   | 0.63 | 0.1  | 0    |
| Grin3b  | 1.48 | NA   | 2.39 | NA   | 0    |
| Grina   | 0    | 1.38 | 5.01 | 1.5  | 0    |
| Grin1a  | 1.64 | NA   | NA   | NA   | 0    |
| Grip1   | 0.66 | 1.55 | 0.62 | 1.15 | 0    |
| Grip2   | NA   | 1.74 | 0    | 1.77 | 0    |
| Gripap1 | NA   | NA   | 1.24 | 0.97 | 0.59 |
| Grk1    | 2.32 | 1.96 | 0    | 0.94 | NA   |
| Grk4    | NA   | 0.64 | 1.72 | 0.74 | 2.24 |
| Grk5    | NA   | 0    | 0.31 | 0.01 | 3.98 |
| Grk6    | NA   | 1.51 | 0.08 | 3.83 | 0    |
| Grif1   | NA   | NA   | NA   | NA   | 0    |
| Grm1    | 0.27 | 1.19 | 0.16 | 1.79 | NA   |
| Grm2    | 0.23 | 2.24 | 1.02 | 0.36 | 1.37 |
| Grm3    | 1.28 | 1.48 | 0.75 | 1.45 | 0    |
| Grm4    | NA   | 0.76 | 0.05 | 0    | 6.88 |

|         |      |      |      |       |      |
|---------|------|------|------|-------|------|
| Grm5    | 0.61 | 0    | 0.91 | 0     | 0    |
| Grm6    | NA   | NA   | NA   | 2.19  | NA   |
| Grm7    | 0    | 1.01 | 0.72 | 0.38  | 0    |
| Grm8    | 1.27 | 0.81 | 0.76 | 0.79  | 2.84 |
| Grn     | 0.26 | 1.21 | 1.75 | 0     | 3.8  |
| Grp     | 0.09 | 1.32 | 1.99 | 0     | 3.22 |
| Grpel1  | 2.53 | 1.51 | 6.28 | 2.74  | 0    |
| Grpel2  | 0.21 | NA   | 0    | 2.46  | 0    |
| Grpr    | 1.17 | 0.76 | 0.65 | 3.92  | 2.38 |
| Grrp1   | NA   | NA   | NA   | NA    | 0    |
| Grsf1   | 0    | 0    | 0.54 | 0.56  | 0    |
| Grtp1   | 2.97 | 4.12 | 0.36 | 0.16  | 0    |
| Grwd1   | 0    | 1.55 | 1.05 | 1.6   | 0.26 |
| Gsap    | NA   | 1.91 | 1.28 | 2.52  | NA   |
| Gsc     | 2.2  | NA   | 0.27 | 3.67  | NA   |
| Gsc2    | NA   | 0.21 | 4.54 | 1.19  | 0    |
| Gscl    | 4.13 | NA   | NA   | NA    | NA   |
| Gsdm1   | 2.03 | NA   | NA   | NA    | NA   |
| Gsdma   | NA   | NA   | NA   | 5.91  | NA   |
| Gsdmc   | NA   | NA   | 0.03 | 0.05  | 9.88 |
| Gsdmd   | NA   | 0    | 0.19 | 0.5   | 1.22 |
| Gsdmdc1 | 0    | NA   | NA   | NA    | NA   |
| Gse1    | NA   | 0    | 1.59 | 0     | NA   |
| Gsg1    | 1.35 | 1.09 | 0.57 | 0     | 4.04 |
| Gsg11   | NA   | NA   | 0    | 0     | 1.96 |
| Gsg2    | 0.6  | NA   | 4.36 | 12.77 | 1.04 |
| Gsh1    | 0.78 | NA   | NA   | NA    | NA   |
| Gsh2    | 2.11 | NA   | NA   | NA    | NA   |
| Gsk3a   | NA   | 0.78 | 2.01 | 1.3   | 4.94 |
| Gsk3b   | 0.74 | 2.13 | 1.38 | 1.31  | 1.69 |
| Gskip   | NA   | NA   | 2.05 | 0.74  | NA   |
| Gsn     | 0.54 | 0.74 | 1.17 | 0.33  | 0    |
| Gspt1   | 0.48 | 1.02 | 0.41 | 0.31  | 1.59 |
| Gspt2   | 0.09 | 1.57 | 1.71 | 0     | 0    |
| Gsr     | 0.76 | 0.37 | 2.54 | 2.72  | 3.6  |
| Gss     | 0    | 0    | 1.61 | 0.16  | 0    |
| Gsta1   | 0.28 | NA   | NA   | NA    | NA   |
| Gsta2   | 0    | NA   | NA   | NA    | NA   |
| Gsta3   | 1.4  | 3.08 | 1.26 | 4.13  | 3.06 |
| Gsta4   | 0.16 | 2.02 | 0.36 | 2.11  | 1.25 |
| Gsted   | NA   | 1.4  | 1.74 | 1.14  | 0    |



|          |      |      |      |      |      |
|----------|------|------|------|------|------|
| Gstk1    | 0.67 | 2.7  | 3.21 | 1.57 | 0.05 |
| Gstm1    | 0.53 | 0    | 1.31 | 0    | 0.57 |
| Gstm2    | 0    | 1.06 | 1.31 | 0.02 | 1.56 |
| Gstm3    | 0    | 0.8  | 1.12 | 1.64 | 1.3  |
| Gstm4    | 0.06 | 0    | 2.42 | 4.26 | 0    |
| Gstm5    | 1.03 | 1.38 | 8.02 | NA   | 1.8  |
| Gsto1    | 1.68 | 0    | 3.01 | 1.01 | 0.6  |
| Gsto2    | NA   | NA   | 1.12 | 0.92 | 0    |
| Gstp1    | 0.75 | 0    | 0.06 | 0.68 | 0    |
| Gstt1    | 0.96 | 1.95 | 0.87 | 1.41 | 1.26 |
| Gstt2    | 0.5  | 4.29 | 1.96 | NA   | 2.14 |
| Gstz1    | 0.31 | 2.39 | 1.85 | NA   | 0.33 |
| Gsx1     | NA   | NA   | 0    | 0.27 | 0    |
| Gsx2     | NA   | NA   | 0.57 | 0.95 | 1.26 |
| Gtdc1    | NA   | 1.4  | 0.94 | 0    | 0    |
| Gtdc2    | NA   | NA   | 1.38 | 0    | NA   |
| Gtf2a1   | 0.41 | 1.33 | 2.58 | 0.49 | 1.02 |
| Gtf2a11  | NA   | NA   | 1.19 | NA   | NA   |
| Gtf2a2   | 0.99 | 0    | 0.95 | 0    | 1.1  |
| Gtf2b    | 0.09 | 0    | 1.89 | 2.64 | 0    |
| Gtf2e1   | 0.61 | 1.8  | 0.98 | 0.73 | 0    |
| Gtf2e2   | 0    | 3.36 | 1.18 | 0.82 | 0    |
| Gtf2f1   | 0.65 | 1.58 | 0.03 | 0.86 | 1.4  |
| Gtf2f2   | 0.8  | 1.7  | 3.18 | 0.85 | 0.88 |
| Gtf2h1   | 0.44 | 1.61 | 1.29 | 1.19 | 0    |
| Gtf2h2   | 0.26 | NA   | 2.53 | NA   | 0.11 |
| Gtf2h3   | 0.16 | 3.06 | 3.24 | 0.36 | 1.31 |
| Gtf2h4   | 0.18 | 1.77 | 0.39 | 0.91 | 0    |
| Gtf2h5   | NA   | 0    | 0.46 | 0    | 0    |
| Gtf2i    | 0.66 | 0.09 | 0.82 | 3.14 | 3.64 |
| Gtf2ird1 | 0.27 | 0    | 2.04 | 3.2  | 2.21 |
| Gtf2ird2 | NA   | NA   | 1.66 | NA   | 4.08 |
| Gtf3a    | 0.33 | 0    | 2.19 | 0    | 0    |
| Gtf3c1   | 1.15 | 0    | 0.46 | 1.44 | 0    |
| Gtf3c2   | 0.28 | 0    | 0    | 2.23 | 2.27 |
| Gtf3c3   | NA   | 0.44 | 0.61 | 0.28 | 0    |
| Gtf3c4   | 0.36 | 0    | 1.04 | 1.56 | 1.3  |
| Gtf3c5   | 0    | 1.54 | 0.7  | 0.01 | 2.81 |
| Gtf3c6   | NA   | NA   | 2.74 | 0.27 | 0    |
| Gtpbp1   | 0    | 1.34 | 0    | 2.92 | 2.41 |
| Gtpbp10  | NA   | 2.08 | 2.02 | 1.06 | 0    |

|         |      |      |      |      |      |
|---------|------|------|------|------|------|
| Gtpbp2  | 0.12 | 1.37 | 1.82 | 1.56 | 0    |
| Gtpbp3  | 0    | 0.67 | 0.39 | 0.85 | 0    |
| Gtpbp4  | 0.07 | 1.6  | 2.9  | 0.76 | 2.17 |
| Gtpbp5  | 2.8  | NA   | NA   | NA   | 0    |
| Gtpbp6  | NA   | 0    | 0.98 | 1.22 | 0    |
| Gtpbp8  | NA   | 0.23 | 1.13 | 0.19 | 5.09 |
| Gtse1   | 0.12 | 2.04 | 1.42 | 1.71 | 0    |
| Gtsf1   | NA   | NA   | 2.91 | 0.86 | 0.88 |
| Gtsf11  | NA   | NA   | 1.81 | 1.48 | 0    |
| Guca1a  | 0.44 | 1.38 | 2.5  | 1.7  | 0    |
| Guca1b  | 1.98 | 0.53 | 0.64 | 1    | 0    |
| Guca2a  | 0.24 | 0    | 0    | 1.16 | 0    |
| Guca2b  | 0.13 | 0.08 | 1.67 | 1.11 | 0    |
| Gucd1   | NA   | NA   | 1.62 | 1.31 | NA   |
| Gucy1a2 | 0    | 2.5  | 0.48 | 2.48 | 0    |
| Gucy1a3 | 0.7  | 1.74 | 0.61 | 0.67 | 0.03 |
| Gucy1b2 | 0.56 | NA   | NA   | 0.84 | NA   |
| Gucy1b3 | 0.06 | 1.61 | 0.85 | 1.07 | 0.01 |
| Gucy2c  | 0.7  | 1.76 | 0.12 | 2.71 | 0    |
| Gucy2d  | NA   | NA   | NA   | 4.53 | NA   |
| Gucy2e  | 0    | NA   | NA   | NA   | NA   |
| Gucy2f  | 0.29 | NA   | NA   | 4.74 | NA   |
| Guf1    | NA   | 0    | 1.01 | 0.26 | 2.79 |
| Guk1    | 0.73 | 1.45 | 1.2  | 0    | 0.82 |
| Gulp1   | 0.7  | 0.28 | 0.24 | 2.03 | 2.09 |
| Gusb    | NA   | 1.19 | 0.84 | 2.23 | 0    |
| Gvin1   | NA   | NA   | NA   | NA   | 0.83 |
| Gxylt1  | NA   | NA   | 2    | 2.7  | NA   |
| Gxylt2  | NA   | NA   | 0.83 | 5.06 | NA   |
| Gylt1b  | 0.06 | NA   | 1.98 | 2.21 | 3.15 |
| Gypa    | 0    | 1.47 | 0    | 1.31 | 3.04 |
| Gypc    | 0.41 | 0    | 2.33 | 1.89 | 0.36 |
| Gys1    | 0    | 1.15 | 1.57 | 0.97 | 0    |
| Gys2    | 1.41 | 2.94 | 1.3  | 3.57 | 1.34 |
| Gzfl    | NA   | NA   | 0.96 | 0.71 | 0.61 |
| Gzma    | 1.25 | 0.87 | 2.06 | 0    | 3.34 |
| Gzmb    | 1.69 | 2.08 | 2.32 | 0.57 | 9.51 |
| Gzmk    | 0    | 0.68 | 0.91 | 0.68 | 4.16 |
| Gzmm    | 1.18 | 0    | 3.88 | 2.96 | 0    |
| H19     | 0.33 | NA   | 0.58 | NA   | 0    |
| H1f0    | 0.85 | 2.33 | 1.94 | 1.03 | 0.87 |

|        |      |      |      |      |      |
|--------|------|------|------|------|------|
| H1fnt  | NA   | NA   | 1.62 | 2.65 | 0    |
| H1foo  | 6.02 | NA   | 0.81 | 2.45 | NA   |
| H1fx   | 0    | 0    | 0    | 1.35 | 0    |
| H2afb1 | NA   | 3.85 | 0.55 | 0.69 | NA   |
| H2afj  | NA   | 0.71 | 0.4  | 2    | 1    |
| H2afv  | 0.48 | 0    | 4.23 | 0    | 0    |
| H2afx  | NA   | 1.13 | 2.92 | 1.13 | 2.47 |
| H2afy  | 0.24 | 0.02 | 0.15 | 0.96 | 0    |
| H2afy2 | NA   | 0.74 | 0    | 1.72 | 1.16 |
| H2afz  | 0.37 | 0.86 | 1.94 | 0.26 | 0    |
| H2bfm  | NA   | NA   | 0.08 | 0.7  | NA   |
| H3f3b  | 0.6  | 0.24 | 0.73 | 1.1  | 0    |
| H6pd   | 1.24 | 0.85 | 1.36 | 0    | 3.2  |
| Haa0   | 1.5  | 3.4  | 0.92 | 2.25 | 1.53 |
| Habp2  | 0.84 | 1.59 | 0.9  | 0.51 | 0.01 |
| Habp4  | 0    | 0.6  | 1.11 | 0.96 | 0.74 |
| Hace1  | 2.45 | NA   | 0.29 | 0.3  | 0    |
| Hacl1  | NA   | NA   | 2.22 | 0.69 | 0    |
| Hadh   | NA   | 0    | 1.52 | 1.1  | 0    |
| Hadha  | 0.61 | 0    | 0.4  | 0.57 | 4.55 |
| Hadhb  | NA   | 0.99 | 0.34 | 2.61 | 0.99 |
| Hagh   | 0.14 | 0.64 | 3.35 | 1.72 | 0    |
| Haghl  | 0    | NA   | 1.95 | 3.86 | 1.93 |
| Hak    | 1.3  | NA   | NA   | NA   | NA   |
| Hal    | 6.47 | 0.95 | 2.44 | 3.89 | 1.26 |
| Hamp   | 5.74 | 2.28 | 1    | 0.82 | 8.62 |
| Hand1  | 0.52 | 1.81 | 0.05 | 1.16 | 2.14 |
| Hand2  | 1.53 | 2.2  | 0    | 2.33 | 2.24 |
| Hao1   | 0.78 | 2.42 | 0.29 | 3.05 | 5.12 |
| Hao2   | NA   | 0.13 | 1.01 | 0    | 0    |
| Hap1   | 0.16 | 0.66 | 0.85 | 0.19 | 2.54 |
| Hapl1  | 0.5  | 0.46 | 1.02 | 3.66 | 1.25 |
| Hapl2  | 1.99 | 0.02 | 0    | 1.04 | 0    |
| Hapl3  | 0.62 | NA   | 0    | 0.66 | 1.71 |
| Hapl4  | 0    | NA   | 3.52 | 6.17 | 0.1  |
| Harbi1 | NA   | NA   | 1.98 | 0.71 | 3.72 |
| Hars   | 0.32 | 2.54 | 1.05 | 0.61 | 0    |
| Hars2  | 0.97 | 0.12 | 1.3  | 0    | 1.75 |
| Has1   | 1.24 | 0.05 | 0.46 | 0.97 | 3.46 |
| Has2   | 2.6  | 0.21 | 0.82 | 1.45 | 1.13 |
| Has3   | 6.03 | NA   | 1.41 | NA   | 3.72 |

|         |       |      |      |      |      |
|---------|-------|------|------|------|------|
| Hat1    | 0.3   | 0.01 | 5.03 | 0.76 | 0    |
| Haus1   | NA    | NA   | 1.89 | 0.02 | 2.9  |
| Haus2   | NA    | 1.11 | 0.07 | 0.66 | 1.21 |
| Haus3   | NA    | 3.11 | 1.48 | NA   | 0    |
| Haus4   | NA    | 2.93 | 2.87 | 1.38 | 1.41 |
| Haus5   | NA    | 0    | 1.86 | 1.47 | 0.79 |
| Haus6   | NA    | 0.29 | 0.8  | 0.53 | 0    |
| Haus7   | NA    | 2.39 | 1.88 | 0    | NA   |
| Haus8   | NA    | NA   | 2.67 | 0.93 | 0.85 |
| Havcr1  | 1.85  | 1.08 | 0.54 | 0    | 0    |
| Havcr2  | 0.12  | NA   | 2.55 | 0.89 | 0    |
| Hax1    | NA    | 1.01 | 3.63 | 0    | 0    |
| Hbegf   | NA    | 0.17 | 2.35 | 0.28 | 1.68 |
| Hbp1    | 0.19  | 0.91 | 1.56 | NA   | 0    |
| Hbq1    | 0.63  | NA   | NA   | NA   | NA   |
| Hbs11   | 0.57  | 0.83 | 1.2  | 1.9  | 1.37 |
| Hbxip   | 3.77  | NA   | NA   | NA   | 4.06 |
| Hccs    | 0.48  | 0.19 | 1.22 | 0.48 | 0    |
| Hcfc1   | 0.08  | 0    | 0.81 | 1.6  | 0.65 |
| Hcfc1r1 | 0     | 0    | 1.04 | NA   | 0    |
| Hcfc2   | NA    | 0.72 | 0.77 | 0.21 | 1.2  |
| Hck     | 0     | 0.62 | 4.53 | 1.95 | 0    |
| Hcls1   | 0     | 3.06 | 2.15 | 0    | 0    |
| Hcn1    | 0     | NA   | 2.01 | 0    | NA   |
| Hcn2    | 2.19  | 1.39 | 1.76 | 1.01 | 0    |
| Hcn3    | 0.04  | NA   | 1.41 | 1.29 | 2.83 |
| Hcn4    | 3.49  | NA   | NA   | 0.16 | NA   |
| Hcrt    | 3.52  | 0.12 | 2.78 | 0.5  | 4.74 |
| Hcrtr1  | 2.88  | 2.14 | 2.11 | 0    | NA   |
| Hcrtr2  | 19.42 | 0.09 | 1.28 | 0.73 | 0    |
| Hcst    | 0     | NA   | 2    | 1.92 | 2.35 |
| Hdac1   | 0.52  | 1.13 | 1.81 | 0.79 | 0    |
| Hdac10  | NA    | NA   | 1.69 | 2.58 | 1.56 |
| Hdac11  | 0     | 1.69 | 3.22 | 2.06 | 1.94 |
| Hdac2   | 0     | 0.91 | 1.3  | 0.93 | 3.21 |
| Hdac3   | 0     | 0    | 2    | 2.28 | 3    |
| Hdac4   | NA    | 0    | 1.74 | 1.66 | 1.43 |
| Hdac5   | 0.4   | 0    | 2.01 | 0.4  | 0.22 |
| Hdac6   | 1.09  | 0.98 | 1.89 | 0.73 | 3.16 |
| Hdac7   | NA    | 2.96 | 1.59 | 1.86 | 0.89 |
| Hdac7a  | 0     | NA   | NA   | NA   | NA   |

|          |      |      |      |      |       |
|----------|------|------|------|------|-------|
| Hdac8    | 0    | NA   | 0.64 | 0.72 | 3.05  |
| Hdac9    | 0.58 | 0    | 0.29 | 2.36 | 0     |
| Hdc      | 0.89 | 4.37 | 0.65 | 0.67 | 10.11 |
| Hddc2    | NA   | 2.24 | 1.35 | 0    | 0     |
| Hddc3    | NA   | NA   | 0.78 | 0.81 | 0     |
| Hdgf     | 0.54 | 1.75 | 0.14 | 2.93 | 4.91  |
| Hdgfl1   | NA   | NA   | 1.06 | 1.11 | 3.36  |
| Hdgfrp2  | NA   | NA   | 0.57 | 0.89 | NA    |
| Hdgfrp3  | 0.08 | 1.2  | 1.47 | NA   | 0.63  |
| Hdhd1a   | NA   | NA   | NA   | NA   | 0     |
| Hdhd2    | NA   | NA   | 1.22 | 0.69 | 0     |
| Hdhd3    | 0    | 0.31 | 3.32 | 0    | 0     |
| Hdlbp    | 1.93 | 0.47 | 0.19 | 1.83 | 0.83  |
| Hdx      | NA   | NA   | NA   | 1.9  | NA    |
| Heatr1   | NA   | 1.19 | 0.68 | 0.85 | 0     |
| Heatr2   | NA   | 0    | 0.53 | NA   | 1.69  |
| Heatr3   | NA   | 1.49 | 2.23 | 0    | 0     |
| Heatr5a  | NA   | NA   | 1.34 | 1.37 | 0     |
| Heatr5b  | NA   | NA   | 0.99 | 1.32 | 2.08  |
| Heatr6   | NA   | 1.02 | 1.11 | 2.07 | 3.18  |
| Heatr7a  | NA   | NA   | NA   | NA   | 1.13  |
| Heatr7b2 | NA   | NA   | NA   | NA   | 2.31  |
| Hebp1    | 0    | 1.43 | 2.88 | 2.36 | 0     |
| Hebp2    | 0.97 | 1.85 | 1.95 | 1.67 | 1.18  |
| Heca     | NA   | 0.83 | 1.32 | 1.16 | 0.08  |
| Hectd1   | 0.14 | NA   | 1.27 | 1.09 | 3.27  |
| Hectd2   | 0.35 | NA   | 1.7  | 1.1  | 0.86  |
| Hectd3   | NA   | 0.63 | 1.17 | 0    | 0     |
| Hecw1    | NA   | 1.22 | 0.4  | 0.34 | 1.96  |
| Hecw2    | NA   | NA   | 0.82 | 2.31 | 0.99  |
| Heg1     | NA   | 0    | 4.84 | 0.74 | 0     |
| Hel308   | 0    | NA   | NA   | NA   | NA    |
| Helb     | 0.83 | NA   | 0.36 | 0    | NA    |
| Hells    | 0.34 | 1.48 | 2.25 | 0    | 0.11  |
| Helq     | NA   | NA   | 1.38 | 0.17 | 0.68  |
| Helt     | 0    | NA   | NA   | 0.96 | NA    |
| Helz     | 1.11 | 0    | 1.27 | 0.88 | 0.1   |
| Helz2    | NA   | NA   | 1.13 | 0.12 | NA    |
| Hemgn    | 0.35 | NA   | 1.33 | 1.62 | 0.17  |
| Hemk1    | 1.4  | 0    | 0.56 | 3.66 | 0     |
| Henmt1   | NA   | NA   | 0    | 0    | NA    |

|          |      |      |      |      |      |
|----------|------|------|------|------|------|
| Hepacam  | NA   | NA   | 1.13 | NA   | 2.05 |
| Hepacam2 | NA   | NA   | 2.04 | 0    | 0.56 |
| Heph     | 0.46 | 0.02 | 3.77 | 0.79 | 0.06 |
| Heph11   | NA   | NA   | NA   | 0.96 | NA   |
| Herc1    | 0.08 | 0    | 1.25 | 0    | 1.41 |
| Herc2    | 0.7  | 0.68 | 0.56 | 0    | 0.83 |
| Herc3    | 1.1  | 2.68 | 0.37 | 2.06 | 3.87 |
| Herc4    | NA   | 0    | 1.9  | 0.89 | 0.09 |
| Herc5    | 1.82 | NA   | NA   | NA   | 0.06 |
| Herc6    | NA   | 1.82 | 1.85 | 0    | NA   |
| Herpud1  | 0.48 | 0.02 | 3.21 | 0.17 | 2.83 |
| Herpud2  | NA   | NA   | 2.71 | 1.81 | 1.22 |
| Hes1     | 1.63 | 0.97 | 3.44 | 0    | 0.78 |
| Hes2     | 6.92 | 0.78 | 0.06 | 0.79 | 0    |
| Hes3     | 0    | NA   | NA   | 2.8  | NA   |
| Hes5     | 0    | NA   | 0.94 | 1.49 | 1.48 |
| Hes6     | 0.11 | NA   | 2.44 | 2.16 | 1    |
| Hes7     | 4.64 | NA   | 8.03 | 0.74 | 0    |
| Hesx1    | 4.1  | 1.75 | 4.88 | 0.66 | 4.15 |
| Hexa     | 0    | 0    | 0.62 | 0.46 | 0    |
| Hexb     | 0    | 1.93 | 2.35 | 1.5  | 0    |
| Hexdc    | NA   | NA   | 1.55 | 0.6  | 0.17 |
| Hexim1   | NA   | 0.4  | 1.01 | 0.83 | 1.64 |
| Hexim2   | NA   | NA   | 0    | 2.95 | NA   |
| Hey1     | 0    | 3.17 | 2.64 | 0.24 | 0    |
| Hey2     | 5.51 | 1.57 | 0.99 | 1.18 | 3.97 |
| Heyl     | 0    | 1.47 | 0.58 | 1.61 | 0    |
| Hfe      | 2.05 | 1.28 | 2.01 | 0    | 2.62 |
| Hfe2     | NA   | NA   | 1.51 | 1.59 | 0.3  |
| Hfm1     | NA   | NA   | NA   | 0.19 | NA   |
| Hgd      | 0.54 | 0.03 | 1.53 | 0    | 2.83 |
| Hgf      | 0    | 0    | 1.18 | 2.2  | 0    |
| Hgfac    | 0.57 | 2.44 | 0.49 | 3.56 | 1.43 |
| Hgs      | 0    | 1.29 | 1.08 | 3.49 | 4.8  |
| Hgsnat   | NA   | 0.71 | 1.03 | 0.36 | 0    |
| Hhat     | NA   | 0    | 1.69 | 1.17 | 1.36 |
| Hhatl    | NA   | NA   | 0.17 | 1.32 | 0    |
| Hhex     | 0.19 | 3.5  | 1.68 | 0.83 | 3.8  |
| Hhip     | 0.27 | NA   | 0.72 | 0    | 1.22 |
| Hhip11   | NA   | NA   | 0.7  | 1.4  | NA   |
| Hhip12   | NA   | 0.97 | 2.06 | 3.19 | 0    |

|           |      |      |      |      |      |
|-----------|------|------|------|------|------|
| Hhla1     | NA   | NA   | NA   | 0.13 | NA   |
| Hiat1     | 0    | NA   | 2.82 | 0.58 | 2.47 |
| Hiat1l    | NA   | NA   | 0.95 | 0.47 | 0    |
| Hibadh    | 0.65 | NA   | 0.98 | 0.86 | 1.25 |
| Hibch     | 0    | 0.98 | 0.06 | 0.96 | 0    |
| Hic1      | 0.51 | 0    | 1.09 | 2.37 | 0    |
| Hic2      | 0.91 | 0.94 | 0.31 | 3.04 | 0.19 |
| Hid1      | NA   | NA   | 0.37 | 0.55 | NA   |
| Hif1a     | 0.15 | 1.29 | 2.08 | 1.23 | 0    |
| Hif1an    | 0.87 | 1.5  | 0.85 | 0.23 | 0.6  |
| Hif3a     | 0    | 0.98 | 0    | 0.15 | 1.7  |
| Higd1a    | NA   | 1.52 | 2.44 | 2.07 | 0    |
| Higd1b    | NA   | 1.92 | 0.74 | 2.81 | 0    |
| Higd2a    | NA   | 0    | 0.92 | 0    | 0    |
| Hilpda    | NA   | 1.35 | 2.07 | 7.12 | NA   |
| Hils1     | 0.78 | NA   | 1.68 | 2.29 | 0    |
| Hinfp     | NA   | 1.09 | 2.03 | 2.75 | NA   |
| Hint1     | 0.22 | 0.67 | 1.92 | 0    | 0    |
| Hint2     | 0.34 | NA   | 0.7  | 0.89 | 0    |
| Hint3     | 0    | NA   | 2.45 | 2.13 | 0    |
| Hip1      | 0.65 | 0.01 | 1.32 | 0    | 3.3  |
| Hip1r     | 2.09 | 0    | 0.43 | 0    | NA   |
| Hip2      | 0    | NA   | NA   | NA   | NA   |
| Hipk1     | 0.29 | 1.33 | 0.81 | 1.4  | 0    |
| Hipk2     | 0.56 | 0    | 3.15 | 1.04 | 0    |
| Hipk3     | 0    | 0.72 | 0.8  | 0.46 | 0    |
| Hipk4     | NA   | NA   | NA   | 2.09 | NA   |
| Hira      | 1.27 | 0    | 0.67 | 2.76 | 1.42 |
| Hirip3    | NA   | 1.16 | 2.52 | 0.35 | 2.97 |
| Hist1h1a  | 0.91 | NA   | NA   | 1.61 | NA   |
| Hist1h1b  | 1.53 | NA   | NA   | 2.15 | NA   |
| Hist1h1c  | 0.07 | 1.82 | 1.74 | 3.42 | 0.75 |
| Hist1h1d  | 0    | NA   | NA   | 0.99 | NA   |
| Hist1h1e  | 0.66 | 2.46 | 0.02 | NA   | 0    |
| Hist1h1t  | 1.11 | 3.54 | 2.8  | 0.98 | 3.27 |
| Hist1h2aa | 6.32 | NA   | NA   | 0.78 | NA   |
| Hist1h2ab | 2.43 | NA   | NA   | 1.32 | NA   |
| Hist1h2ac | 1.04 | NA   | NA   | 7.12 | NA   |
| Hist1h2ad | 1.13 | NA   | NA   | NA   | NA   |
| Hist1h2ae | 0.93 | NA   | NA   | 1.46 | NA   |
| Hist1h2ag | 0.84 | NA   | NA   | NA   | NA   |

|           |      |      |      |       |      |
|-----------|------|------|------|-------|------|
| Hist1h2ah | 2.57 | NA   | NA   | NA    | NA   |
| Hist1h2ai | 0.92 | NA   | NA   | NA    | NA   |
| Hist1h2ak | 2.13 | NA   | NA   | 16    | NA   |
| Hist1h2ba | 5.12 | NA   | NA   | 0.7   | NA   |
| Hist1h2bb | 0.72 | NA   | NA   | 0.8   | NA   |
| Hist1h2bc | 0.17 | 2.16 | 1.01 | 1.91  | 0.66 |
| Hist1h2be | 0.18 | 0    | 0    | 0     | 5.53 |
| Hist1h2bf | 0.66 | NA   | NA   | NA    | NA   |
| Hist1h2bg | 0.92 | NA   | NA   | 2.32  | NA   |
| Hist1h2bh | 1.18 | NA   | NA   | 0.62  | NA   |
| Hist1h2bj | 0.27 | NA   | NA   | NA    | NA   |
| Hist1h2bk | 0.05 | NA   | NA   | NA    | NA   |
| Hist1h2bl | 0.36 | NA   | NA   | NA    | NA   |
| Hist1h2bm | 0.68 | NA   | NA   | 1.02  | NA   |
| Hist1h2bn | 0.15 | NA   | NA   | 2.89  | NA   |
| Hist1h3a  | NA   | 3.76 | 0.93 | 15.57 | NA   |
| Hist1h3b  | 2.39 | NA   | NA   | NA    | NA   |
| Hist1h3c  | 1.22 | NA   | NA   | NA    | NA   |
| Hist1h3d  | 0.25 | 3.21 | 0.76 | 3.57  | NA   |
| Hist1h3e  | 1.09 | NA   | NA   | NA    | NA   |
| Hist1h3f  | 0.64 | 4.3  | 0    | 0.92  | 1.7  |
| Hist1h3g  | 2.23 | NA   | NA   | NA    | NA   |
| Hist1h3h  | 0.81 | 2    | 3.08 | NA    | NA   |
| Hist1h3i  | 3.9  | 1.43 | 0.41 | 4.04  | NA   |
| Hist1h4a  | 0.84 | NA   | NA   | NA    | NA   |
| Hist1h4b  | 0.85 | 1.69 | 1.24 | NA    | NA   |
| Hist1h4c  | 0    | NA   | NA   | 0.92  | NA   |
| Hist1h4d  | 2.03 | NA   | NA   | 1.22  | NA   |
| Hist1h4f  | 0.53 | NA   | NA   | 1.7   | NA   |
| Hist1h4h  | 0.18 | 2.3  | 1.15 | 0.97  | 1.29 |
| Hist1h4i  | 0.2  | NA   | NA   | 0.51  | NA   |
| Hist1h4j  | NA   | 1.29 | 0.49 | NA    | 1.39 |
| Hist1h4k  | 0    | NA   | NA   | NA    | NA   |
| Hist2h2ab | 0.48 | NA   | NA   | 1.5   | NA   |
| Hist2h2ac | 1.1  | NA   | NA   | NA    | NA   |
| Hist2h2be | 1.17 | 3    | 0.7  | 0     | 7.1  |
| Hist3h2a  | 2.37 | 1.25 | 2.06 | 0.5   | 0.36 |
| Hist3h2bb | 0    | NA   | NA   | NA    | NA   |
| Hist4h4   | NA   | NA   | NA   | 1.02  | NA   |
| Hivep1    | 0.51 | 1.31 | 1.67 | 1.06  | 0    |
| Hivep2    | 0    | 0.08 | 1.82 | 2.17  | 0    |



|         |      |      |      |      |       |
|---------|------|------|------|------|-------|
| Hivep3  | 1.02 | 1    | 1.41 | 0    | 0.78  |
| Hjurp   | NA   | 0.64 | 2.56 | 0    | 1.99  |
| Hk1     | 0.67 | 0.43 | 3.3  | 0.01 | 0     |
| Hk2     | 0.26 | 1.83 | 3.05 | 0    | 1.2   |
| Hk3     | 0.98 | 0    | 1.13 | 0.99 | 0     |
| Hkdc1   | NA   | 0    | 0.59 | 2.55 | 2.17  |
| Hlcs    | 0    | 0.97 | 0.46 | 2.82 | 1.61  |
| Hlf     | 0.98 | 0.7  | 0.93 | 0    | 0     |
| Hltf    | NA   | 1.78 | 0    | 0.5  | 2.05  |
| Hlx     | NA   | 0.88 | 1.42 | 0.49 | 0     |
| Hlx1    | 1.26 | NA   | NA   | NA   | NA    |
| Hlxb9   | 2.12 | NA   | NA   | NA   | NA    |
| Hmbox1  | NA   | 0.91 | 1.66 | 0.9  | 0.97  |
| Hmbs    | 0.13 | 1.77 | 0.79 | 1    | 0     |
| Hmcn1   | NA   | NA   | 0.12 | 0    | 2.55  |
| Hmg20a  | 0    | 0    | 0.9  | 0.56 | 0     |
| Hmg20b  | 0.59 | 0.02 | 1.54 | 0.12 | 1.82  |
| Hmga1   | 0.43 | NA   | NA   | 0    | NA    |
| Hmga2   | 0.56 | 0.77 | 0.44 | 1.59 | 0.78  |
| Hmgb1   | NA   | 1.48 | 0.92 | 1    | 0     |
| Hmgb2   | 2.97 | 0.01 | 1.52 | 0    | 0     |
| Hmgb3   | 0.6  | 1.57 | 1.96 | 1.03 | 0     |
| Hmgb4   | NA   | NA   | 1.3  | 4.78 | 18.09 |
| Hmgcl   | 0    | 0.7  | 0.8  | 0.26 | 0     |
| Hmgcll1 | 2.41 | NA   | 0.62 | 1.39 | 0     |
| Hmger   | 0.74 | 0.59 | 0.83 | 0.01 | 0     |
| Hmgcs1  | 0.47 | 0.71 | 0.94 | 0    | 0.53  |
| Hmgcs2  | 1.03 | 1.88 | 1.22 | 1.18 | 2.07  |
| Hmgn1   | NA   | 0    | 1.01 | 0    | 0     |
| Hmgn2   | 0.47 | NA   | NA   | 1.66 | 7.42  |
| Hmgn3   | 1.08 | 2    | 1.97 | 1.63 | 7.09  |
| Hmgn5   | NA   | 0.56 | 2.22 | 0.95 | NA    |
| Hmgxb3  | NA   | 0    | 0.09 | 2.48 | 1.29  |
| Hmgxb4  | NA   | 0.46 | 0.28 | 0.44 | 0     |
| Hmha1   | NA   | 0.09 | 2.71 | 0.03 | 3.29  |
| Hmmr    | 0.74 | 0    | 2.41 | 2.53 | 0     |
| Hmox1   | 1.16 | 2.32 | 1.53 | 0    | 5.56  |
| Hmox2   | 0.12 | 3.11 | 3.4  | NA   | 0     |
| Hmx1    | 0    | 1.42 | 2.55 | 1.8  | 0     |
| Hmx2    | NA   | NA   | 4.95 | 0    | 0     |
| Hmx3    | 1.3  | NA   | NA   | 1.72 | NA    |

|           |      |      |      |      |      |
|-----------|------|------|------|------|------|
| Hn1       | 0.53 | 2.55 | 1.23 | 0.96 | 1.35 |
| Hn1l      | NA   | 0.87 | 2.23 | 0.67 | 0.96 |
| Hnf1a     | NA   | 2.19 | 1.89 | 0.95 | 0    |
| Hnf1b     | NA   | 0.81 | 0.87 | 1.36 | 0    |
| Hnf4a     | 2.24 | 0.92 | 0.79 | 0.76 | 2.42 |
| Hnf4g     | 1.02 | 0.31 | 1.05 | 0.63 | 0.67 |
| Hnmt      | 0    | 0    | 0.99 | 0    | 2.64 |
| Hnrnpa0   | NA   | 2.61 | 2.73 | 0    | 0    |
| Hnrnpa1   | NA   | 1.9  | 1.53 | NA   | 0    |
| Hnrnpa2b1 | NA   | 2.42 | 0.45 | 2.52 | 0.03 |
| Hnrnpa3   | NA   | 1.83 | 0    | 0.66 | 1.55 |
| Hnrnpab   | NA   | 2.2  | 1.22 | 0.04 | 0    |
| Hnrnpc    | NA   | 0.97 | 0.36 | 0.72 | 0    |
| Hnrnpd    | NA   | 0    | 1.19 | 0    | 0    |
| Hnrnpf    | NA   | 1.85 | 0.4  | 0.51 | 2.66 |
| Hnrnph1   | NA   | 1.67 | 0.15 | 0    | 0    |
| Hnrnph2   | NA   | 0.2  | 1.43 | 0.67 | 0    |
| Hnrnph3   | NA   | 0.12 | 1.97 | 2.62 | 0.48 |
| Hnrnpk    | NA   | 1.89 | 5.68 | 0.08 | 0    |
| Hnrnpl    | NA   | 0.64 | 1.4  | 1.62 | 1.89 |
| Hnrnpm    | NA   | 0.57 | 0.82 | NA   | 0    |
| Hnrnpr    | NA   | 1.47 | 0.31 | 0.35 | 1.92 |
| Hnrnpu    | NA   | 0.99 | 0.87 | 0.01 | 0    |
| Hnrnpul1  | NA   | 0    | 4.09 | 0.23 | 0    |
| Hnrnpul2  | NA   | 0.03 | 0.47 | 0    | 1.13 |
| Hnrpa0    | 0.07 | NA   | NA   | NA   | NA   |
| Hnrpa1    | 0    | NA   | NA   | NA   | NA   |
| Hnrpa2b1  | 0    | NA   | NA   | NA   | NA   |
| Hnrpab    | 0.06 | NA   | NA   | NA   | NA   |
| Hnrpc     | 1.45 | NA   | NA   | NA   | NA   |
| Hnrpd     | 3.09 | NA   | NA   | NA   | NA   |
| Hnrpdl    | 0    | NA   | NA   | NA   | 0    |
| Hnrpf     | 0    | NA   | NA   | NA   | NA   |
| Hnrph1    | 0.04 | NA   | NA   | NA   | NA   |
| Hnrph2    | 2.26 | NA   | NA   | NA   | NA   |
| Hnrpk     | 0.18 | NA   | NA   | NA   | NA   |
| Hnrpl     | 3.19 | NA   | NA   | NA   | NA   |
| Hnrpll    | NA   | NA   | NA   | NA   | 1.57 |
| Hnrpm     | 0.4  | NA   | NA   | NA   | NA   |
| Hnrpr     | 0.81 | NA   | NA   | NA   | NA   |
| Hnrpu     | 1.09 | NA   | NA   | NA   | NA   |

|          |      |      |      |      |      |
|----------|------|------|------|------|------|
| Hnrpul1  | 0.91 | NA   | NA   | NA   | NA   |
| Hnt      | 0.43 | NA   | NA   | NA   | NA   |
| Hoga1    | NA   | NA   | 4.9  | 0    | NA   |
| Homer1   | 0.91 | 1.29 | 3.89 | 1.26 | 0.89 |
| Homer2   | 0.54 | 1.53 | 0.89 | 0.6  | 0    |
| Homer3   | 0    | 3.25 | 1.65 | NA   | 1.08 |
| Homez    | 0    | NA   | 0    | NA   | 0.7  |
| Hook1    | 0.77 | 0.38 | 0.93 | 0    | 0    |
| Hook2    | 0.57 | 0    | 1.9  | 4.6  | 0.07 |
| Hook3    | 0    | NA   | 0.87 | 0    | 1.23 |
| Hopx     | NA   | 1.75 | 0.35 | 0.7  | 8.09 |
| Hormad1  | NA   | NA   | 0.53 | 0    | NA   |
| Hormad2  | NA   | NA   | 2.33 | 0.65 | 0    |
| Hoxa1    | 0.86 | 1.51 | 2.11 | 0    | 1.43 |
| Hoxa10   | 0.46 | 0    | 0.98 | 0    | 0    |
| Hoxa11   | 0.52 | 1.3  | 0.84 | 1.33 | 3.15 |
| Hoxa11as | NA   | NA   | NA   | NA   | 3.78 |
| Hoxa13   | 1.15 | NA   | 1.79 | 3.29 | 0    |
| Hoxa2    | 0.79 | 1.99 | 0    | 0    | 8.61 |
| Hoxa3    | 0.65 | 0.24 | 0    | 0.82 | 1.51 |
| Hoxa4    | 1.42 | 0.53 | 1.34 | 0.39 | 2.6  |
| Hoxa5    | 0.74 | 1.01 | 0    | 0.9  | 2.9  |
| Hoxa6    | 0.64 | NA   | NA   | 2.45 | NA   |
| Hoxa7    | 0.4  | 3.3  | 3.3  | 0    | 0    |
| Hoxa9    | 0.66 | NA   | NA   | 0    | 0.13 |
| Hoxb1    | 1.53 | 1.47 | 0.03 | 0.53 | 4.67 |
| Hoxb13   | 3.84 | 2.1  | 0    | 0    | 0    |
| Hoxb2    | 0.05 | 2.75 | 1.09 | 0    | 0    |
| Hoxb3    | 0.45 | 0    | 1.92 | 0.06 | 0.79 |
| Hoxb4    | 0.57 | NA   | 2.23 | 0.9  | 2.16 |
| Hoxb5    | 2.82 | 1.37 | 2.25 | 0    | 3.13 |
| Hoxb6    | 0.52 | 0    | 1.43 | 0.97 | 0    |
| Hoxb7    | 0.86 | 2.05 | 2.8  | 0.02 | 3.14 |
| Hoxb8    | 2.26 | 0.35 | 1.22 | 0.07 | NA   |
| Hoxb9    | 0.27 | 0    | 0.65 | 0.41 | 0    |
| Hoxc10   | 0    | 1.29 | 1.94 | 7.12 | 2.14 |
| Hoxc11   | NA   | NA   | NA   | 1.89 | NA   |
| Hoxc12   | 0    | NA   | NA   | 1.32 | NA   |
| Hoxc13   | 3    | 0.14 | 0.16 | 1.01 | 0    |
| Hoxc4    | 0.9  | 1.66 | 0.04 | NA   | 0    |
| Hoxc5    | 0.06 | 0.59 | 1.47 | 1.41 | 1.65 |

|         |      |      |      |      |       |
|---------|------|------|------|------|-------|
| Hoxc6   | 0    | 1.13 | 1.17 | 0.48 | 0     |
| Hoxc8   | 1.46 | 0.93 | 1.9  | 0.57 | 2.87  |
| Hoxc9   | 1.29 | NA   | 2.11 | 0    | 1.3   |
| Hoxd1   | 2.11 | 2.44 | 0.71 | 2.15 | 4.25  |
| Hoxd10  | 0.4  | 2.01 | 0.88 | 2.09 | 0     |
| Hoxd11  | 0.98 | 0.92 | 0.65 | 0.94 | 0.27  |
| Hoxd12  | 0    | 0.84 | 0.95 | 1.51 | 0     |
| Hoxd13  | 0.58 | 1.13 | 0.42 | 1.94 | 0.04  |
| Hoxd3   | 4.98 | 0.98 | 0.03 | 0.09 | 2.93  |
| Hoxd4   | 1.02 | NA   | 1.66 | 0    | 0     |
| Hoxd8   | 0.02 | NA   | 1.52 | 1.18 | 1.33  |
| Hoxd9   | 0.84 | 2.18 | 0    | 1.66 | 1.51  |
| Hp      | 1.95 | 0    | 1.12 | 2.54 | 0     |
| Hp1bp3  | 1.02 | 2.51 | 1.97 | 0.53 | 0     |
| Hpca    | 1.84 | 2.8  | 0.95 | 1.82 | 0.99  |
| Hpcal1  | 0    | 2.61 | 1.95 | 1.24 | 0     |
| Hpcal4  | 0.96 | 0.44 | 0.99 | 0    | 2.62  |
| Hpd     | 2.22 | 2.48 | 0    | 2.86 | 7.29  |
| Hpdl    | NA   | NA   | 0.94 | 1.8  | 2.28  |
| Hpgd    | NA   | 0.84 | 2.19 | 4.28 | 4.89  |
| Hpgds   | NA   | 2.13 | 3.74 | 0.39 | 1.37  |
| Hpn     | 2.65 | 2.36 | 1.98 | 1.17 | 0.05  |
| Hps1    | 0.12 | 0.8  | 1.12 | 0.72 | 1.06  |
| Hps3    | 0    | NA   | 0.59 | 0.98 | 3.19  |
| Hps4    | 0.45 | 0    | 3.92 | 1.53 | 0.02  |
| Hps5    | 0    | 0.06 | 3.14 | 0.92 | 3.5   |
| Hps6    | 0.03 | 1.68 | 1.04 | 3.5  | 0     |
| Hpse    | 0    | 3.06 | 0.44 | 0.46 | 0     |
| Hpse2   | NA   | NA   | NA   | 0.01 | NA    |
| Hpx     | NA   | 1.04 | 0.28 | 1.37 | 10.88 |
| Hr      | 0.6  | 1.8  | 2.53 | 0.66 | 0     |
| Hrasls  | 2.98 | 1.02 | 0    | 2.6  | 1.22  |
| Hrasls3 | 3.96 | NA   | NA   | NA   | NA    |
| Hrasls5 | NA   | NA   | 2.36 | 0.8  | 0.26  |
| Hrb     | 0.53 | NA   | NA   | NA   | NA    |
| Hrbl    | 1.12 | NA   | NA   | NA   | NA    |
| Hrc     | 2.22 | 0.39 | 0    | 2.63 | 6.27  |
| Hrct1   | NA   | NA   | 0.95 | 0.42 | 3.04  |
| Hrg     | 0.78 | 1.24 | 1.98 | 0    | 4.55  |
| Hrh1    | 0.91 | 1.28 | 0.21 | 1.82 | 1.37  |
| Hrh2    | 0.47 | 0.52 | 0.4  | 1.11 | 0     |

|          |      |      |      |      |       |
|----------|------|------|------|------|-------|
| Hrh3     | 3.3  | 0    | 1.13 | 1.39 | 0     |
| Hrh4     | 0.76 | 1.32 | 1.43 | 0.48 | 0     |
| Hrk      | NA   | 1.03 | 1.58 | 2.03 | 0     |
| Hrnr     | 1.27 | NA   | NA   | 1.78 | NA    |
| Hrsp12   | 0    | 2.34 | 2.73 | 1.45 | 1.69  |
| Hs1bp3   | 0    | 1.8  | 1.34 | 2.28 | 0.73  |
| Hs2st1   | 0.07 | 1.2  | 0.85 | 0    | 1.29  |
| Hs3st1   | 0    | 1.43 | 2.24 | 1.17 | 0.15  |
| Hs3st2   | 3.05 | 1.13 | 0.12 | 1.43 | 1.07  |
| Hs3st3a1 | 0    | 1.55 | 0.1  | 2.18 | 4.1   |
| Hs3st3b1 | 0.24 | 1.74 | 0.42 | 0.79 | 1.16  |
| Hs3st4   | NA   | NA   | 0.78 | NA   | 1.8   |
| Hs3st5   | NA   | NA   | 0.52 | 0    | NA    |
| Hs3st6   | NA   | NA   | 1.4  | 0.52 | 10.67 |
| Hs6st1   | 1.58 | 0.63 | 4.63 | 0.89 | NA    |
| Hs6st2   | 0.42 | NA   | 0.84 | 0.21 | 0.52  |
| Hs6st3   | 2.55 | NA   | 1.23 | 0.28 | 5.05  |
| Hsbp1    | 0    | 3.87 | 1.28 | 0    | 0.2   |
| Hsbp111  | NA   | NA   | 0    | NA   | NA    |
| Hscb     | NA   | NA   | 2.06 | 0.02 | 0     |
| Hsd11b1  | 0.12 | 2.13 | 1.61 | 0.24 | 0     |
| Hsd11b2  | 0    | 1.37 | 0    | 1.32 | 8.78  |
| Hsd17b1  | 0    | 0.02 | 0    | 1.01 | 1.34  |
| Hsd17b10 | NA   | 1.56 | 0.66 | 0    | 0     |
| Hsd17b11 | 0.37 | 0.77 | 0.77 | 1.55 | 1.07  |
| Hsd17b12 | 0    | 1.78 | 1.45 | 0    | 1.03  |
| Hsd17b13 | 5.39 | NA   | NA   | 0    | NA    |
| Hsd17b14 | NA   | 1.76 | 0.76 | 2.81 | 1.1   |
| Hsd17b2  | 2.82 | 2.17 | 1.44 | 0.44 | 0     |
| Hsd17b3  | 0.65 | 0.58 | 0.62 | 1.62 | 4.54  |
| Hsd17b4  | 1.36 | 0    | 1.12 | 0.72 | 0.08  |
| Hsd17b6  | NA   | 0.73 | 0.74 | 2.58 | 1.5   |
| Hsd17b7  | 1.69 | 0.88 | 1.8  | NA   | 1.77  |
| Hsd3b1   | 4.14 | 0.76 | 0.29 | 0.43 | 2.98  |
| Hsd3b2   | 1.03 | 1.33 | 0.4  | 1.89 | 0     |
| Hsd3b7   | 0    | NA   | 1.51 | 1.09 | 1.49  |
| Hsd11    | NA   | NA   | 4.33 | 1.72 | 0.78  |
| Hsd12    | NA   | 3.27 | 0.79 | 1.74 | 0     |
| Hsf1     | 1.98 | 1.48 | 1.21 | 0    | 1.22  |
| Hsf2     | 0.65 | 0    | 1.23 | 1.06 | 0     |
| Hsf2bp   | 0    | 1.2  | 0    | 2.3  | 1.01  |

|          |      |      |      |      |      |
|----------|------|------|------|------|------|
| Hsf4     | 0    | 3.34 | 0.28 | NA   | 0    |
| Hsf5     | NA   | NA   | 1.25 | 0    | 1.53 |
| Hsfy2    | NA   | NA   | 0.51 | 1.76 | NA   |
| Hsh2d    | 4.22 | NA   | 1.67 | 1.43 | NA   |
| Hsp90aa1 | NA   | 1.59 | 0.42 | 0.8  | 0    |
| Hsp90ab1 | NA   | 0    | 0.52 | 1.63 | 0.54 |
| Hsp90b1  | NA   | 1.5  | 1.44 | 0.11 | 1.25 |
| Hspa12a  | 0.67 | 1.11 | 0.88 | 0    | 0    |
| Hspa12b  | 0.39 | NA   | 0.74 | 0.84 | 2.82 |
| Hspa13   | NA   | 0.26 | 1.21 | 0    | 0    |
| Hspa14   | 0.68 | 0.18 | 0.32 | 0.93 | 2.15 |
| Hspa1a   | 0.68 | 0.71 | 1.99 | 1    | 3.67 |
| Hspa1b   | 0.47 | 1.31 | 1.6  | NA   | NA   |
| Hspa11   | 1.02 | 1.03 | 1.97 | 0    | 5.62 |
| Hspa2    | 1.38 | 0.91 | 2.28 | 2.05 | 0    |
| Hspa4    | 0    | 0.44 | 0.74 | 0    | 0    |
| Hspa4l   | NA   | 0.65 | 1.08 | 0.3  | 2.24 |
| Hspa5    | 7.93 | 1.89 | 0.96 | 0    | 1.43 |
| Hspa8    | 0    | 2.16 | 0    | 0.73 | 0    |
| Hspa9    | NA   | 0.46 | 0.9  | 1.99 | 0    |
| Hspb1    | 0.64 | 1.14 | 1.77 | 5.74 | 1.39 |
| Hspb11   | NA   | 0.17 | 2.5  | 0.09 | 0    |
| Hspb2    | 0.31 | 1.8  | 0.85 | NA   | 3.23 |
| Hspb3    | 0.83 | 1.27 | 0.05 | 2.3  | 0    |
| Hspb6    | NA   | 1.97 | 3.25 | 2.1  | 4.15 |
| Hspb7    | 2.72 | 1.11 | 0.12 | 1.29 | 1.94 |
| Hspb8    | 1.14 | 1.51 | 0.43 | 0    | 1.4  |
| Hspb9    | 3.8  | NA   | 1.82 | 0.98 | 2.19 |
| Hspbap1  | 0    | 0.9  | 1.13 | 1.82 | 2.89 |
| Hsbbp1   | NA   | 1.77 | 1.34 | 1.21 | 0    |
| Hspc171  | 0.4  | NA   | NA   | NA   | NA   |
| Hspd1    | 0.01 | 1.44 | 0.68 | 0.67 | 1.16 |
| Hspe1    | 0    | 0.29 | 0.43 | 0.38 | 1.05 |
| Hspg2    | 0.91 | 1.27 | 0.94 | NA   | 0    |
| Hsph1    | NA   | 1.96 | 1.23 | 0.57 | 0    |
| Hszfp36  | 0.31 | NA   | NA   | NA   | NA   |
| Htatip   | 0.67 | NA   | NA   | NA   | NA   |
| Htatip2  | 0    | 2.37 | 0.75 | 0    | 0.8  |
| Htatsf1  | 0.19 | 0.48 | 2.15 | 1.2  | 1.58 |
| Htf9c    | 1.22 | NA   | NA   | NA   | NA   |
| Htr1a    | 0.24 | 1.65 | 0.96 | 0.7  | 3.24 |

|        |       |      |      |      |      |
|--------|-------|------|------|------|------|
| Htr1b  | 0     | 0.83 | 0.29 | 3.83 | 4.33 |
| Htr1d  | 16.79 | 1.49 | 0    | 0.36 | 3.11 |
| Htr1f  | 2.79  | 1.5  | 0.68 | 2.43 | 0    |
| Htr2a  | 2.1   | NA   | NA   | 0.17 | NA   |
| Htr2b  | 0.11  | 2.62 | 0.32 | 0.29 | 0    |
| Htr2c  | 2.48  | 0    | 1.14 | 0    | 1.37 |
| Htr3a  | 1.83  | 2.28 | 1.85 | 5.63 | 3.37 |
| Htr3b  | 0.86  | 2.35 | 0    | 0.69 | 0    |
| Htr4   | 0     | 0    | 0.01 | 1.44 | 0    |
| Htr5a  | 0     | 0.04 | 1.46 | 2.73 | 2.39 |
| Htr6   | 2.09  | 1.93 | 1.43 | 0.59 | 2.2  |
| Htr7   | 0     | 1.09 | 0.39 | 0.89 | 0.1  |
| Htra1  | NA    | 0.07 | 2.72 | 1.43 | 0    |
| Htra2  | NA    | 0    | 0.82 | NA   | 3.06 |
| Htra3  | 1.7   | NA   | 0.85 | 0.04 | 1.75 |
| Htra4  | NA    | NA   | 0    | 0.4  | NA   |
| Htt    | NA    | 0.82 | 1.09 | 0    | 0    |
| Hunk   | 2.19  | 0    | 2.54 | 0.69 | 0    |
| Hus1   | 0.62  | 0.73 | 0.43 | 1.99 | 2.15 |
| Hus1b  | 0.2   | NA   | NA   | 2.6  | NA   |
| Huwe1  | NA    | 0.37 | 0.92 | 1.83 | 0.12 |
| Hven1  | NA    | NA   | 0.7  | NA   | 0    |
| Hyal1  | 0.28  | NA   | NA   | NA   | NA   |
| Hyal2  | 0.41  | 4.77 | 0.9  | 2.63 | 0    |
| Hyal3  | 0     | 1.54 | 5.59 | NA   | 4.64 |
| Hyal4  | 0     | 2.47 | 2.2  | 1.13 | 0    |
| Hydin  | 2.64  | 1.15 | 0.43 | NA   | 1.54 |
| Hyi    | NA    | 1.46 | 0.54 | 0.14 | 1.03 |
| Hyls1  | NA    | NA   | 0.83 | 0.36 | 0    |
| Hyou1  | 0     | 1.82 | 0.34 | 0    | 2.11 |
| Hypk   | NA    | 2.08 | 0.55 | 0.45 | NA   |
| Iah1   | NA    | NA   | 2.11 | 0    | 0    |
| Iapp   | 2.52  | 0.97 | 1.07 | 0.46 | 1.46 |
| Iars   | 0.25  | 2.54 | 5.74 | 1.3  | 0    |
| Iars2  | NA    | 0    | 1.9  | 0.18 | 5.44 |
| Iba57  | NA    | 2.06 | 0.03 | 0.82 | NA   |
| Ibrdc2 | 1.2   | NA   | NA   | NA   | NA   |
| Ibrdc3 | 0     | NA   | NA   | NA   | NA   |
| Ibsp   | 1.77  | 1.06 | 0.76 | 0.94 | 0    |
| Ibtk   | 0     | 0.5  | 1.65 | 0    | 3.64 |
| Ica1   | 0     | 0.71 | 1.76 | 0.67 | 0    |

|         |      |      |      |      |       |
|---------|------|------|------|------|-------|
| Ica11   | NA   | NA   | 2.64 | 6.27 | 2.29  |
| Icam1   | 0.17 | 0.59 | 3.3  | 1.95 | 0     |
| Icam2   | 0.25 | 0    | 1.73 | 0.11 | 0     |
| Icam4   | 0    | 1.34 | 0.36 | 0.68 | 2.57  |
| Icam5   | 0    | 4.74 | 0.34 | 1.14 | 0     |
| Ick     | 0.58 | 0    | 0.77 | 1.47 | 0     |
| Icmt    | 0.24 | 0.86 | 1.03 | NA   | 0     |
| Icos    | 0.54 | 0    | 0.13 | 2.44 | 0.96  |
| Ict1    | 0.07 | 1.36 | 0    | 0.51 | 0     |
| Id1     | NA   | 1.3  | 4.3  | 0.39 | 0.09  |
| Id2     | NA   | 2    | 1.22 | 0.26 | 3.15  |
| Id3     | NA   | 0    | 0.15 | 1.13 | 2.43  |
| Id4     | NA   | 0.61 | 0.64 | 0    | 1.95  |
| Ide     | 1.66 | 0.19 | 1.57 | 0    | 0     |
| Idh1    | 0.12 | 2.16 | 1.27 | 2.75 | 2.6   |
| Idh2    | 0    | 0    | 1.01 | 0.63 | 0     |
| Idh3a   | 0    | 1.15 | 0.03 | 0.6  | 0     |
| Idh3b   | 0.16 | 0    | 2.82 | 0.99 | 0     |
| Idh3g   | 0.33 | 0    | 0.54 | 1.48 | 0     |
| Idi1    | 0.74 | 0    | 1.57 | 1.05 | 1.59  |
| Idi2    | NA   | NA   | 2.04 | 0.26 | 1.71  |
| Idnk    | NA   | NA   | 0.81 | 1.44 | NA    |
| Ido1    | NA   | 0.43 | 4.18 | 0.38 | 10.69 |
| Ido2    | NA   | NA   | 0.98 | 1.04 | NA    |
| Ids     | 0.31 | 0.18 | 1.93 | 0.63 | 0     |
| Idua    | 0.83 | 0.23 | 0.02 | 0    | 0     |
| Ier2    | 0.86 | 2.86 | 1.79 | 2    | 0     |
| Ier3    | 0.4  | 0.55 | 2.08 | 0.02 | 0     |
| Ier3ip1 | NA   | 1.25 | 0.93 | 0.54 | 0     |
| Ier5    | 4.18 | 1.15 | 1.14 | 2.22 | 0     |
| Ier5l   | 0.27 | NA   | 1.75 | 1.24 | 1.16  |
| Iffo1   | NA   | 0.22 | 0.95 | 1.52 | 0     |
| Iffo2   | NA   | NA   | 0.18 | 1.89 | 0     |
| Ifi16   | 0.1  | NA   | NA   | NA   | NA    |
| Ifi27l1 | NA   | NA   | 1.95 | 0.31 | 0     |
| Ifi30   | 5.86 | 0    | 0.76 | 1.45 | 0.06  |
| Ifi35   | 0.06 | 0.05 | 1.49 | 0    | 0     |
| Ifi44   | NA   | 0.4  | 0.04 | 0    | 0     |
| Ifi44l  | NA   | 0.85 | 1.59 | 0    | NA    |
| Ifih1   | 0.06 | 0.86 | 0.73 | 0    | 0     |
| Ifit1   | 0    | 2.17 | 1.05 | 0    | 0     |



|         |      |      |      |      |      |
|---------|------|------|------|------|------|
| Ifit2   | 0.01 | 1.33 | 1.12 | 0    | 0    |
| Ifit3   | 0    | 1.35 | 1.97 | 0    | 0    |
| Ifitm1  | 0    | 0.2  | 0.3  | 0.55 | 0.31 |
| Ifitm10 | NA   | NA   | 0.78 | 0.92 | NA   |
| Ifitm2  | 0.08 | 1.17 | 0.66 | 0.17 | 0    |
| Ifitm3  | 0    | 0.44 | 0.82 | 0.77 | 0    |
| Ifitm5  | 1.1  | NA   | NA   | 1.06 | NA   |
| Ifltd1  | NA   | NA   | 1.55 | 7.36 | NA   |
| Ifna1   | 1.42 | 2.04 | 1.61 | NA   | 3.39 |
| Ifna13  | 1.62 | NA   | NA   | 1.64 | NA   |
| Ifna14  | 0.77 | NA   | NA   | 0    | NA   |
| Ifna2   | 0.79 | 2.29 | 0.98 | 0    | 1.67 |
| Ifna4   | 0.87 | 1.6  | 1.94 | NA   | 2.6  |
| Ifna5   | 0.92 | 3.13 | 2.18 | NA   | 2.86 |
| Ifna6   | 0.64 | NA   | NA   | 0    | NA   |
| Ifna7   | 0.58 | NA   | NA   | NA   | NA   |
| Ifnar1  | 0.22 | 0    | 1.29 | 0.46 | 0    |
| Ifnar2  | 0.28 | 0    | 0.81 | 0.61 | 2.34 |
| Ifnb1   | 0    | 2.37 | 2.07 | 1.99 | 0    |
| Ifne    | NA   | NA   | NA   | 6.55 | NA   |
| Ifng    | 0    | 0.43 | 0    | 0.27 | 5.84 |
| Ifngr1  | 0.53 | 0    | 3.23 | 0.35 | 0    |
| Ifngr2  | 0.13 | 0.4  | 1.57 | 0.42 | 0    |
| Ifnk    | 0.32 | NA   | NA   | 0.33 | NA   |
| Ifnl3   | NA   | NA   | NA   | 0    | NA   |
| Ifnlr1  | NA   | NA   | 0.5  | 2.23 | NA   |
| Ifrd1   | 0.56 | 1.45 | 1.84 | 0    | 1.89 |
| Ifrd2   | 0    | 0    | 1.41 | 1.58 | 1.31 |
| Ifrg15  | 1.06 | NA   | NA   | NA   | NA   |
| Ift122  | NA   | 0.05 | 0.77 | 0.34 | 0.42 |
| Ift140  | NA   | 0.68 | 1.82 | 0    | 1.34 |
| Ift172  | 1.33 | NA   | 1.7  | 0    | 2.15 |
| Ift20   | NA   | 2.64 | 3.44 | 0.79 | 0    |
| Ift27   | NA   | 0.44 | 1.66 | 1.2  | NA   |
| Ift43   | NA   | NA   | 2.11 | 0.38 | NA   |
| Ift46   | NA   | 2.26 | 1.19 | 0    | NA   |
| Ift52   | NA   | 4.01 | 0.67 | 1.41 | 1.12 |
| Ift57   | NA   | 0    | 0.19 | 0.18 | 2.18 |
| Ift74   | NA   | 2.06 | 0.59 | 1.37 | 0    |
| Ift80   | NA   | NA   | 0.01 | 1.19 | 0    |
| Ift81   | NA   | 0    | 0.13 | 0.67 | 0.56 |

|         |      |      |      |      |      |
|---------|------|------|------|------|------|
| Ift88   | NA   | 0    | 3.28 | 0.22 | 0    |
| Igbp1   | 0.31 | 1.76 | 0.82 | 0.79 | 2.09 |
| Igdcc3  | NA   | NA   | 0.64 | 2.63 | 0    |
| Igdcc4  | NA   | NA   | 3.09 | 0    | 0    |
| Igf1    | 0.26 | 0.51 | 1.83 | 1.25 | 2.3  |
| Igf1r   | 0    | 0.63 | 0.51 | 1.19 | 0    |
| Igf2    | 1.15 | NA   | NA   | NA   | NA   |
| Igf2as  | 2.29 | NA   | NA   | NA   | 6.8  |
| Igf2bp1 | 0.49 | NA   | 0.61 | 1.14 | 1.58 |
| Igf2bp2 | NA   | 2.09 | 1.32 | 0.75 | 0.14 |
| Igf2bp3 | 0    | 1.28 | 1.68 | 0.44 | 0    |
| Igf2r   | 1.9  | 0.05 | 0.74 | 0    | 0    |
| Igfals  | 0.29 | 3.66 | 4.5  | 1.74 | 7.06 |
| Igfbp1  | 2.93 | 0.88 | 1.75 | 1.21 | 4.8  |
| Igfbp2  | 2.51 | 3.42 | 0.86 | 4.49 | 0.91 |
| Igfbp3  | 0.85 | 0    | 1.08 | 0    | 0.72 |
| Igfbp4  | 0.88 | 0.96 | 2.94 | 0.38 | 0    |
| Igfbp5  | 0.56 | 0    | 0.9  | 0.41 | 1.34 |
| Igfbp6  | 1.33 | 4.36 | 0.26 | 0    | 1.66 |
| Igfbp7  | 0    | 0.66 | 1.97 | 0.15 | 1.08 |
| Igfbp11 | 3.44 | NA   | 0.09 | 1    | 0    |
| Igf13   | NA   | NA   | NA   | 0.04 | NA   |
| Igflr1  | NA   | 2.69 | 1.31 | 2.18 | NA   |
| Igfn1   | NA   | NA   | NA   | 1.57 | NA   |
| Ighg1   | NA   | 0.62 | 2.64 | NA   | 0    |
| Ighm    | NA   | 0.13 | 1.04 | 0.04 | NA   |
| Ighmbp2 | 1.21 | 0.76 | 0.54 | 0.02 | 0    |
| Igj     | 1.51 | 1.17 | 1.91 | 0.09 | 2.99 |
| Igk     | NA   | 0    | 4.01 | NA   | NA   |
| Igkc    | NA   | NA   | NA   | 0.39 | NA   |
| Igl11   | NA   | 0.56 | 3.19 | 1.7  | 0.21 |
| Iglon5  | NA   | NA   | 0.1  | 1.42 | 3.15 |
| Igsf1   | 0.9  | 0    | 0.35 | 0.93 | 0    |
| Igsf10  | 0.45 | NA   | 0.02 | 0.26 | 2.01 |
| Igsf11  | 0    | NA   | 0.97 | 1.5  | 0    |
| Igsf21  | NA   | NA   | 1.91 | 1.42 | 0    |
| Igsf3   | 1.43 | 0.66 | 0.78 | 3.2  | 0.06 |
| Igsf5   | NA   | NA   | 0.98 | 1.15 | NA   |
| Igsf6   | 0.81 | 0.02 | 2.12 | 4    | 0    |
| Igsf8   | 2.74 | NA   | 0.71 | 0    | 0.03 |
| Igsf9   | 4.02 | NA   | 1.17 | 1.71 | 0    |

|         |      |      |      |      |      |
|---------|------|------|------|------|------|
| Igsf9b  | NA   | NA   | NA   | 0.86 | NA   |
| Ihh     | 0.93 | 2.25 | 1.9  | 2.49 | 2.45 |
| Ihpk1   | 0.89 | NA   | NA   | NA   | NA   |
| Ik      | 0    | 2.48 | 0.87 | 1.08 | 2.51 |
| Ikbip   | NA   | NA   | 0.67 | 0.47 | NA   |
| Ikbkap  | 0.41 | 0    | 0.24 | 1.4  | 0    |
| Ikbkb   | 0.59 | 0    | 1.54 | 1.99 | 0    |
| Ikbke   | NA   | 1.03 | 1.86 | 0.9  | 0.05 |
| Ikbkg   | 0    | 2.99 | 4.34 | 1.08 | 1.16 |
| Ikzf1   | NA   | 0    | 1.01 | 2.07 | 1.03 |
| Ikzf2   | NA   | 1.52 | 0.49 | 1.43 | 0    |
| Ikzf3   | NA   | 1.73 | 0    | 3.13 | 1.5  |
| Ikzf4   | NA   | 0.62 | 1.2  | 1.27 | 0    |
| Ikzf5   | NA   | 0.41 | 0.76 | 0.01 | 0    |
| Il10    | 0.11 | 0    | 4.34 | 3.46 | 0    |
| Il10ra  | 0.22 | 0.73 | 1.71 | 0.92 | 2.17 |
| Il10rb  | 0.06 | 0    | 2.31 | 1.65 | 0    |
| Il11    | 0.06 | 1.14 | 1.28 | 3.68 | 3.32 |
| Il12a   | 3.73 | 1.93 | 2.22 | 0.01 | 0.1  |
| Il12b   | 0    | 1.1  | 1.23 | 1.81 | 0    |
| Il12rb1 | 0.93 | 1.29 | 1.62 | 0.97 | 0.68 |
| Il12rb2 | 1.06 | 0    | 1.86 | 1.22 | 6.14 |
| Il13    | 0.93 | 2.74 | 1.32 | 0    | 0    |
| Il13ra1 | 0.69 | 0.96 | 5.2  | 1.88 | 0    |
| Il13ra2 | 0.55 | 0.98 | 4.07 | 0    | 7.92 |
| Il15    | 0.35 | 1.41 | 0.95 | 0    | 6.82 |
| Il15ra  | 0.07 | 0    | 0    | 9.62 | 0.31 |
| Il16    | 0    | 0    | 0.28 | 4.03 | 0    |
| Il17a   | NA   | 0.77 | 0.31 | 1.45 | 5.46 |
| Il17b   | 2.53 | 0    | 0.52 | 0.96 | 0    |
| Il17c   | 1.63 | NA   | NA   | 0.86 | NA   |
| Il17d   | 2.61 | NA   | 0.45 | 2.4  | 0    |
| Il17f   | 0.74 | NA   | NA   | 5.24 | NA   |
| Il17ra  | NA   | 0.32 | 3.1  | 1.36 | 0    |
| Il17rb  | 2.96 | 1.3  | 2.3  | 2.87 | 3.21 |
| Il17rc  | 0.33 | 0.82 | 1.62 | 1.04 | 0    |
| Il17rd  | 2.59 | NA   | 0.6  | 0    | 0.74 |
| Il17re  | 0    | NA   | 0.47 | 1.28 | 1.47 |
| Il18    | 0.59 | 0.14 | 1.14 | 1.74 | 0    |
| Il18bp  | 0    | 1.84 | 0.38 | 2.91 | 2.98 |
| Il18r1  | 0.72 | 0.01 | 3.22 | 0.53 | 4.4  |

|         |      |      |      |      |      |
|---------|------|------|------|------|------|
| II18rap | 1.39 | 0.05 | 1.21 | 0    | 0    |
| II19    | 0.38 | NA   | NA   | 0.79 | NA   |
| II1a    | 0.3  | 0.85 | 2.18 | 1.97 | 0    |
| II1b    | 0.5  | 0.41 | 0.07 | 1.13 | 0    |
| II1f10  | 0.93 | NA   | 0.32 | 1.26 | 0    |
| II1f5   | 1.56 | NA   | NA   | NA   | 2.52 |
| II1f6   | 1.54 | NA   | NA   | NA   | 0.94 |
| II1f8   | 2.86 | NA   | NA   | NA   | 1.82 |
| II1f9   | 4.39 | NA   | NA   | NA   | 0.07 |
| II1r1   | 0.44 | 0    | 1.33 | 1.53 | 3.04 |
| II1r2   | 2.44 | 0.28 | 2.2  | 0    | 0    |
| II1rap  | 0    | 0.85 | 1.34 | 0    | 0    |
| II1rap1 | 0.65 | 1.93 | 0    | 0    | 2.25 |
| II1rap2 | 0.51 | 0.83 | 0    | 0.87 | 2.07 |
| II1r11  | 0.62 | 0.18 | 0.42 | 0.54 | 0    |
| II1r12  | 2.41 | 1.24 | 2.24 | 0.05 | 0    |
| II1rn   | 0.04 | 0.2  | 1.69 | 0.36 | 0    |
| II2     | 2.21 | 0.37 | 1.99 | 0    | 1.53 |
| II20    | 1.13 | NA   | 6.09 | 0.23 | 3.41 |
| II20ra  | NA   | 0    | 1.14 | 1.82 | 3.92 |
| II20rb  | NA   | NA   | 1.69 | 0.76 | 0.6  |
| II21    | 0.4  | 3.26 | 1.42 | 2.13 | 0    |
| II21r   | 0    | 0    | 0.84 | 0.22 | 2.48 |
| II22    | 1.67 | NA   | NA   | NA   | NA   |
| II22ra1 | 0.75 | NA   | NA   | 0.54 | NA   |
| II22ra2 | 1.88 | NA   | 0    | 0.45 | 2.97 |
| II23a   | 0    | 2.11 | 0.41 | 0.68 | 0.51 |
| II23r   | 3.75 | NA   | NA   | 3.51 | NA   |
| II24    | 0.61 | 0    | 2.44 | 0.27 | 4.06 |
| II25    | NA   | 1.11 | 1.14 | 1.39 | 0    |
| II27    | 0    | NA   | NA   | 2.12 | NA   |
| II27ra  | 0    | 0.54 | 1.4  | 0    | 0.73 |
| II28ra  | 0.54 | NA   | NA   | NA   | 7.06 |
| II2ra   | 0    | 1.77 | 3.41 | 0.72 | 1.92 |
| II2rb   | 0    | 0    | 0.23 | 0.13 | 3.54 |
| II2rg   | 1.54 | 1.19 | 0.47 | 5.52 | 0    |
| II3     | 0.29 | 1.51 | 2.7  | 1.83 | 1.84 |
| II31    | NA   | NA   | NA   | 1.74 | NA   |
| II31ra  | 0    | NA   | 2.1  | 2.1  | 0.02 |
| II33    | NA   | 1.5  | 0    | 1.42 | 0.26 |
| II34    | NA   | NA   | 0    | 0.11 | 6.22 |

|        |      |      |      |      |      |
|--------|------|------|------|------|------|
| Il3ra  | 1.97 | 1.91 | 0.47 | 0.17 | 0.1  |
| Il4    | 4.47 | 1.11 | 1.36 | 0.96 | 0    |
| Il4i1  | 0.99 | NA   | NA   | NA   | NA   |
| Il5    | 0.79 | 0.25 | 4.75 | 0    | 0    |
| Il5ra  | 1.29 | 0    | 0.25 | 6.96 | 0.04 |
| Il6    | 0.41 | 2.89 | 1.92 | 0.4  | 0    |
| Il6st  | 0.63 | 0.25 | 1.45 | 2.38 | 0    |
| Il7    | 1.18 | 0.97 | 3.85 | 1.36 | 2.67 |
| Il7r   | 0    | 0    | 2.14 | 1.44 | 2.41 |
| Il8    | NA   | 0.68 | 1.61 | 1.83 | NA   |
| Il8ra  | 0.51 | NA   | NA   | NA   | NA   |
| Il8rb  | 0.01 | NA   | NA   | NA   | NA   |
| Il9    | 0    | 1.31 | 3.98 | 1.97 | 0    |
| Il9r   | 0.87 | 2.05 | 2.31 | 0.7  | 1.33 |
| Ildr1  | NA   | NA   | 1.36 | 2.36 | 0    |
| Ildr2  | NA   | NA   | 0.57 | 0.44 | NA   |
| Ilf2   | 0    | 1.44 | 0.11 | 0.61 | 0    |
| Ilf3   | 0.2  | 0    | 1.29 | 1.61 | 0    |
| Ilk    | 0    | 2.32 | 4.1  | 1.38 | 0    |
| Ilkap  | NA   | 0.12 | 1.25 | NA   | 1.7  |
| Ilvbl  | 0    | 0.06 | 0    | 0    | 0.97 |
| Immpl1 | NA   | NA   | 0    | 0    | 0    |
| Immpl2 | 0.39 | NA   | 1.23 | 0.94 | 0.19 |
| Immt   | 0.73 | 0    | 0    | 0    | 1.64 |
| Imp3   | NA   | 0    | 1.8  | 0.69 | 0    |
| Imp4   | NA   | 1.02 | 0.25 | 1.59 | 2.89 |
| Impa1  | 2.16 | 0.8  | 1.17 | 0    | 0.5  |
| Impa2  | 0    | 0.01 | 0.22 | 0.85 | 4.37 |
| Impact | 0.4  | 0    | 0.35 | 1.15 | 0    |
| Impad1 | NA   | 1.96 | 0.67 | 0.39 | 0    |
| Impdh1 | 0.34 | 4    | 0.45 | 2.26 | 0    |
| Impdh2 | 0.32 | 0.87 | 0.16 | 0.51 | 0    |
| Impg1  | 2.24 | 1.38 | 0.81 | 0.31 | 0.12 |
| Impg2  | 0.85 | NA   | NA   | 0.77 | NA   |
| Ina    | 1.3  | 0.98 | 2.09 | 1.93 | 1.99 |
| Inadl  | NA   | 0    | 1.28 | 0    | 0.51 |
| Inca1  | NA   | NA   | NA   | 1.88 | NA   |
| Incenp | 3.65 | 0.77 | 1.32 | 0    | 1.56 |
| Indo   | 0    | NA   | NA   | NA   | NA   |
| Inf2   | NA   | 0.05 | 0.02 | 0.94 | 1.4  |
| Ing1   | 0    | 0.36 | 0.21 | 1.08 | 0    |

|        |      |      |      |      |      |
|--------|------|------|------|------|------|
| Ing2   | NA   | 1.1  | 2.42 | 2.3  | 0    |
| Ing3   | 0.4  | 0.7  | 0.24 | 0.31 | 1.59 |
| Ing4   | 1.04 | 1.54 | 1.01 | 0.65 | 0.14 |
| Ing5   | 0    | NA   | 0.75 | 1.48 | 0.78 |
| Inha   | 1    | 1.87 | 0.91 | 4.93 | 4.01 |
| Inhba  | 0    | 0.02 | 0.17 | 0.3  | 0.88 |
| Inhbb  | 0.41 | 0    | 1.96 | 0.02 | NA   |
| Inhbc  | 0.54 | 1.79 | 0.12 | 0    | 0    |
| Inhbe  | 1.27 | 1.46 | 1.59 | 0    | 2.53 |
| Inip   | NA   | NA   | 0.91 | 0.51 | NA   |
| Inmt   | NA   | NA   | 0.44 | 0.43 | 5.11 |
| Ino80  | NA   | NA   | 0.96 | 1.75 | 0    |
| Ino80b | NA   | 0.62 | 3    | 1.28 | 0.06 |
| Ino80c | NA   | NA   | 1.16 | 0.69 | 1.35 |
| Ino80d | NA   | 1    | 0.5  | 1.24 | 2.16 |
| Ino80e | NA   | NA   | 0    | 1.28 | 2.48 |
| Inpp1  | 0.21 | 1.74 | 1.66 | 0.8  | 4.27 |
| Inpp4a | 0.4  | 0.35 | 1.71 | 0    | 2.25 |
| Inpp4b | 1.61 | 0    | 0.61 | 1.74 | 1.38 |
| Inpp5a | 0    | 0.74 | 5.72 | 0    | 0    |
| Inpp5b | 0.97 | 0    | 1.04 | 0    | 0    |
| Inpp5d | 0.88 | 0    | 2.2  | 1.83 | 0    |
| Inpp5e | 1.02 | 0    | 4.22 | 2.49 | 1.61 |
| Inpp5f | 0    | 0.21 | 3.36 | 0    | 0.23 |
| Inpp5j | NA   | 2.6  | 3.95 | 1.72 | 3.47 |
| Inpp5k | NA   | 0    | 2.62 | 0.47 | 0    |
| Inpp11 | 0.48 | 1.73 | 3.14 | 1.44 | 1.13 |
| Insc   | NA   | NA   | 0    | 1.47 | 1.66 |
| Insig1 | 0.75 | 1.24 | 1.83 | 0.11 | 0    |
| Insig2 | 0    | 0.73 | 2.13 | 1.55 | 2.2  |
| Insl3  | 1.05 | NA   | NA   | NA   | NA   |
| Insl5  | 0.02 | 3.29 | 1.41 | 0.71 | 3.06 |
| Insl6  | 1.72 | 1.82 | 1.73 | 0    | 0    |
| Insm1  | 0    | 1.04 | 0.85 | 0.91 | 1.91 |
| Insm2  | 0    | NA   | 0.84 | 0    | 1.1  |
| Insr   | 1    | 1.17 | 1.14 | 0    | 0    |
| Insr   | 2.14 | 0    | 0.24 | NA   | 5.43 |
| Ints1  | NA   | 0.44 | 1.4  | 1.09 | 0    |
| Ints10 | NA   | NA   | 0.69 | 0.56 | 0.23 |
| Ints12 | NA   | 0.57 | 2.14 | 0.08 | 3.57 |
| Ints2  | NA   | NA   | 1.91 | 1.44 | 2.77 |

|        |      |      |      |      |      |
|--------|------|------|------|------|------|
| Ints3  | NA   | 1.36 | 0.33 | 1.76 | 0    |
| Ints4  | NA   | NA   | 1.89 | 0.7  | 1.02 |
| Ints5  | NA   | 1.33 | 0    | 1.44 | 1.59 |
| Ints6  | NA   | 1.44 | 1.94 | 0    | 1.11 |
| Ints7  | NA   | 0    | 0.84 | 0.44 | 1.34 |
| Ints8  | NA   | 1.24 | 0    | 0.18 | 0    |
| Ints9  | NA   | 0    | 0.3  | 0    | 1.07 |
| Intu   | NA   | NA   | 0.38 | 0.82 | 0.64 |
| Invs   | 0.11 | 1.32 | 0.03 | 0    | 0.96 |
| Ip6k1  | NA   | 0.74 | 1.26 | 0.04 | 0    |
| Ip6k2  | NA   | 2.66 | 0.57 | 0    | 0.32 |
| Ip6k3  | NA   | NA   | 2.91 | 0.1  | 2.56 |
| Ipcef1 | NA   | 0.76 | 0    | 1.89 | 4.1  |
| Ipmk   | 1.45 | NA   | 1.71 | 0    | 0.94 |
| Ipo11  | 0.01 | NA   | 2.14 | 0.02 | 0.99 |
| Ipo13  | 0.11 | 0    | 0.82 | 1.36 | 3.62 |
| Ipo4   | 0.35 | 2.01 | 2.43 | 2.33 | 0.76 |
| Ipo5   | NA   | 1.04 | 0.33 | 0.17 | 1.82 |
| Ipo7   | 1.38 | 1.27 | 0.59 | 0.68 | 3.43 |
| Ipo8   | 0.42 | 0.73 | 0.73 | 0    | 0    |
| Ipo9   | 0.46 | 0    | 1.51 | 0.1  | 1.09 |
| Ipp    | 1.15 | 3.95 | 4.25 | NA   | 0.52 |
| Ippk   | NA   | 2.58 | 2.99 | NA   | 0    |
| Ipw    | NA   | 1.92 | 0.66 | NA   | 0.27 |
| Iqca   | 0.77 | NA   | NA   | NA   | NA   |
| Iqcb1  | NA   | 0.79 | 4.54 | 0.95 | 2.65 |
| Iqcc   | 2.8  | 3.03 | 1.94 | 2.41 | 3.24 |
| Iqcd   | 0    | NA   | 0.68 | 5.54 | NA   |
| Iqce   | 0    | 1.5  | 1.08 | 1.94 | 0    |
| Iqcf1  | 3.03 | NA   | 0.35 | 3.71 | NA   |
| Iqcf3  | 1.62 | NA   | 1.04 | NA   | 0    |
| Iqcf4  | NA   | NA   | 0    | NA   | NA   |
| Iqcf5  | NA   | NA   | 0.82 | NA   | 8.64 |
| Iqcg   | NA   | 0.78 | 0.2  | 1    | 0    |
| Iqch   | NA   | 0.98 | 1.83 | 5.02 | 0    |
| Iqck   | NA   | 0.97 | 0    | 0.32 | 0    |
| Iqgap1 | 0    | 0.3  | 0.48 | 0    | 0    |
| Iqgap2 | NA   | 0.15 | 1.65 | 0    | 0    |
| Iqgap3 | NA   | NA   | 1.75 | 0    | 2.98 |
| Iqsec1 | NA   | 2.7  | 0    | 1.22 | 0    |
| Iqsec2 | NA   | 0.09 | 1.27 | 0.4  | 1.84 |

|          |      |      |      |      |       |
|----------|------|------|------|------|-------|
| Iqsec3   | 0.42 | 2.49 | 1.24 | 0.91 | 0     |
| Iqub     | NA   | NA   | 0.01 | 0.18 | NA    |
| Iqwd1    | 0    | NA   | NA   | NA   | NA    |
| Irak1    | 0.68 | 0    | 1.74 | NA   | 0     |
| Irak1bp1 | 0    | NA   | 0.81 | 0.82 | 4.4   |
| Irak2    | 0    | NA   | 0.76 | 0.38 | 0     |
| Irak3    | 0.05 | 0    | 1.71 | 0.5  | 0     |
| Irak4    | 0.79 | 0    | 5.65 | 0.35 | 0.9   |
| Ireb2    | 1.01 | 0.12 | 0.79 | 0.65 | 0     |
| Irf1     | 0    | 1.48 | 1.23 | 0.69 | 0     |
| Irf2     | 0.66 | 1.03 | 2.71 | 1.24 | 0.05  |
| Irf2bp1  | 1    | 1.04 | 2.01 | 0.89 | 0.13  |
| Irf2bp2  | 0    | NA   | 1.61 | 1.64 | 1.94  |
| Irf2bp1  | NA   | NA   | 4.03 | 0.29 | NA    |
| Irf3     | 0    | 0    | 0    | 0    | 2.03  |
| Irf4     | 0.87 | 0.52 | 0.97 | 0    | 0     |
| Irf5     | 0.37 | 0.89 | 0.24 | 2.13 | 0     |
| Irf6     | 0.84 | 1.72 | 1.01 | 5.55 | 2.53  |
| Irf7     | 0.91 | 0.01 | 0.36 | 2.47 | 0     |
| Irf8     | NA   | 1.92 | 3.12 | 0.73 | 3.16  |
| Irf9     | NA   | 1.23 | 5.88 | 0    | 0     |
| Irg1     | NA   | NA   | NA   | 0.18 | 0     |
| Irgq     | NA   | 1.18 | 0.72 | 0.73 | 1.37  |
| Irs1     | 0    | 0    | 0.54 | 1.27 | 0.72  |
| Irs2     | NA   | 1.26 | 1.09 | 0.86 | 0     |
| Irs4     | 1.33 | 0.96 | 0    | 2.29 | 0.87  |
| Irx1     | 2.24 | NA   | 0.69 | 1.32 | 2.9   |
| Irx2     | 1.33 | NA   | 1.49 | 0.88 | NA    |
| Irx3     | 0.97 | NA   | 2.55 | 0    | 1.74  |
| Irx4     | 5.65 | 1.89 | 0.84 | 3.87 | 12.53 |
| Irx5     | 0    | 1.55 | 1.44 | 2.18 | 1.95  |
| Irx6     | 0.73 | NA   | NA   | 2.35 | NA    |
| Isca1    | NA   | 1.98 | 0.84 | 1.28 | 0     |
| Isca2    | NA   | NA   | 0.86 | 1.26 | 0     |
| Iscu     | NA   | 0.62 | 2.34 | 0    | 0.92  |
| Isg15    | NA   | 1    | 0.23 | 0.03 | NA    |
| Isg20    | 0.01 | 1.15 | 0.53 | 8.06 | 1.71  |
| Isg2012  | NA   | 1.14 | 2.92 | 3.04 | 0.12  |
| Isgf3g   | 1.16 | NA   | NA   | NA   | NA    |
| Isl1     | 0.37 | 1.51 | 0.72 | 0    | 0     |
| Isl2     | 1.51 | NA   | 0.96 | 0.55 | 0     |



|          |      |      |      |      |      |
|----------|------|------|------|------|------|
| Islr     | 1.56 | 1.44 | 0.99 | 3.4  | 0    |
| Islr2    | NA   | NA   | 0    | 1.36 | 0    |
| Ism1     | NA   | NA   | 0.42 | NA   | 0.5  |
| Isoc1    | NA   | 2.4  | 2.05 | 0.16 | 0    |
| Ist1     | NA   | 1.17 | 1.27 | 0.29 | NA   |
| Isx      | NA   | NA   | 1.42 | 0    | 2.47 |
| Isy1     | NA   | NA   | 0.27 | 0.79 | 0.83 |
| Isyna1   | 3.57 | 3.02 | 2.28 | 0    | 1.25 |
| Itch     | 2.2  | 0.69 | 1.85 | 0.05 | 0    |
| Itfg1    | NA   | 2.71 | 0.45 | 0.79 | 0.75 |
| Itfg2    | NA   | 0    | 0.41 | 0.96 | 0    |
| Itfg3    | NA   | NA   | 1.08 | 0.02 | 0    |
| Itga1    | 0    | 0.06 | 3.75 | NA   | NA   |
| Itga10   | 0.98 | 1.68 | 1.4  | 0.06 | 0    |
| Itga11   | 0.91 | NA   | NA   | 0.06 | NA   |
| Itga2    | 0.73 | 0.52 | 0.67 | 0    | 1.21 |
| Itga2b   | 5.83 | 1.44 | 1.29 | 0.36 | 0    |
| Itga3    | 4.92 | 1.19 | 0    | 2.06 | 0    |
| Itga4    | 0.43 | 0.01 | 2.25 | NA   | 0    |
| Itga5    | 0    | 2.01 | 1.47 | 2.14 | 4.44 |
| Itga6    | 2.65 | 0    | 2.43 | 0.97 | 1.04 |
| Itga7    | 1.5  | 3.97 | 0.89 | 1.08 | 0    |
| Itga8    | 1.28 | 1.88 | 1.92 | 0    | 1.48 |
| Itga9    | 0    | 1.22 | 0.92 | 2.97 | 0.97 |
| Itgad    | NA   | NA   | NA   | 1.55 | NA   |
| Itgae    | 0.71 | 2.19 | 1.14 | 1.16 | 4.05 |
| Itgal    | 0.4  | 0.23 | 2.27 | 1.49 | 5.68 |
| Itgam    | 0.37 | 0    | 0.77 | 1.44 | 0    |
| Itgav    | 0.54 | 0    | 0.93 | 0    | 0    |
| Itgax    | 0.48 | 1.33 | 0.29 | 1.85 | 1.07 |
| Itgb1    | 1.32 | 0.37 | 0.77 | 0.64 | 0.72 |
| Itgb1bp1 | 1.23 | 0.59 | 0.52 | 0.41 | 1.98 |
| Itgb1bp2 | 1.07 | 1.01 | 1.73 | 0    | 0    |
| Itgb1bp3 | 0.57 | NA   | NA   | NA   | 2.82 |
| Itgb2    | 2.5  | 2.3  | 0.92 | 0    | 1.25 |
| Itgb3    | 0.91 | 1.26 | 2.18 | 0    | 0.9  |
| Itgb3bp  | NA   | 0.45 | 1.57 | NA   | 0    |
| Itgb4    | 0.96 | 1.47 | 0    | 2.17 | 0    |
| Itgb4bp  | 0.45 | NA   | NA   | NA   | NA   |
| Itgb5    | 1.56 | 0.96 | 0.82 | 1.45 | 1.86 |
| Itgb6    | 0.22 | 0.53 | 0.66 | 0.24 | 0    |

|          |      |      |      |      |      |
|----------|------|------|------|------|------|
| Itgb7    | 1.05 | 0    | 3.65 | 0.43 | 0    |
| Itgb8    | 0    | 0.7  | 3.9  | 0    | 0    |
| Itgb11   | 0.58 | 0.93 | 0.56 | 0.61 | 5.11 |
| Itih1    | 1.24 | 1.24 | 0.94 | 1.37 | 4.57 |
| Itih2    | 0.27 | 0.08 | 0    | 1.95 | 2.13 |
| Itih3    | 1.93 | 1.71 | 0.83 | 2.57 | 4.25 |
| Itih4    | 1.64 | 2.2  | 1.22 | 1.11 | 5.82 |
| Itih5    | 0    | 1.16 | 0.39 | 1.69 | 0    |
| Itk      | 0.64 | 0    | 0.76 | 1.41 | 2.29 |
| Itln1    | NA   | NA   | 0.5  | NA   | 0    |
| Itln2    | 1.13 | NA   | NA   | NA   | NA   |
| Itm2a    | 0    | 0.13 | 1.99 | 1.25 | 0    |
| Itm2b    | 0.46 | 0.91 | 0.75 | 4.47 | 0.68 |
| Itm2c    | 0.13 | 4.17 | 1    | 1.56 | 3.94 |
| Itpa     | 0.44 | 2.17 | 1.64 | 0.74 | 4.42 |
| Itpk1    | 0    | 0.81 | 1.96 | 0.27 | 1.25 |
| Itpka    | 4.98 | 2.1  | 2.82 | 2.76 | 0    |
| Itpkb    | 0.46 | 0    | 0.41 | 2.73 | 1.39 |
| Itpkc    | 2.72 | 0    | 1.64 | 1.21 | 0    |
| Itpri1   | 0.38 | 0    | 2.05 | 1.08 | 0.63 |
| Itpri2   | 2.14 | 1.45 | 0.83 | 1.66 | 0.98 |
| Itpri3   | 1.1  | 0    | 1.8  | 0    | 0.55 |
| Itprip   | NA   | NA   | 1.78 | NA   | 0    |
| Itprip11 | NA   | NA   | 1.74 | 1.09 | 2.79 |
| Itprip12 | NA   | NA   | 0.36 | 1.63 | 0    |
| Itsn1    | 0.17 | 1.16 | 1.26 | 0    | 0.98 |
| Itsn2    | NA   | 0.93 | 1.05 | 1.14 | 0    |
| Ivd      | 0.43 | 0.88 | 0.96 | 0.11 | 1.05 |
| Ivl      | 1.95 | 1.29 | 6.51 | 0    | 0    |
| Ivns1abp | 5.35 | 1.12 | 0.89 | 1.13 | 2.21 |
| Iws1     | NA   | NA   | 1.7  | 2.57 | 0    |
| Ixl      | 0.24 | NA   | NA   | NA   | NA   |
| Iyd      | NA   | NA   | 1.06 | 0.77 | 0.29 |
| Izumo1   | NA   | NA   | 0    | 2.49 | NA   |
| Izumo2   | NA   | NA   | 5.53 | 0.54 | NA   |
| Izumo4   | NA   | 1.89 | 2.4  | 3.41 | NA   |
| Jag1     | 0    | 0    | 1.13 | 2.02 | 0    |
| Jag2     | 5.65 | 1.06 | 1.04 | 1.08 | 0    |
| Jagn1    | NA   | NA   | 1.66 | 2.44 | 0    |
| Jak1     | 0    | 0    | 1.05 | 0    | 1.92 |
| Jak2     | 0.26 | 0.94 | 2.25 | 0.79 | 0.41 |

|         |      |      |      |      |      |
|---------|------|------|------|------|------|
| Jak3    | 0    | 0    | 1.66 | 1.21 | 0    |
| Jakmip1 | NA   | NA   | 1.43 | 4.49 | 1.02 |
| Jakmip2 | NA   | 2.06 | 1.98 | 0.18 | 0.12 |
| Jakmip3 | NA   | NA   | 0.5  | 1.22 | 0    |
| Jam2    | 0.26 | 0.72 | 0.66 | 1.3  | 1.13 |
| Jam3    | 0.69 | 1.38 | 0.51 | 3.29 | 1.27 |
| Jarid1a | 0    | NA   | NA   | NA   | NA   |
| Jarid1b | 0    | NA   | NA   | NA   | NA   |
| Jarid1c | 0.62 | NA   | NA   | NA   | NA   |
| Jarid1d | 0.63 | NA   | NA   | NA   | NA   |
| Jarid2  | 0    | 0.6  | 3.15 | 0    | 1.65 |
| Jazf1   | NA   | NA   | 4.24 | 1.3  | 3.64 |
| Jdp2    | NA   | NA   | 0    | 1.17 | 2.91 |
| Jhdm1d  | NA   | 0.21 | 2.42 | 1.65 | 0.99 |
| Jkamp   | NA   | NA   | 1.26 | 0.93 | 0    |
| Jmjd1a  | 0    | NA   | NA   | NA   | NA   |
| Jmjd1b  | 0.13 | NA   | NA   | NA   | NA   |
| Jmjd1c  | 0.53 | 1.52 | 1.17 | 0    | 2.36 |
| Jmjd2a  | 0.93 | NA   | NA   | NA   | NA   |
| Jmjd2b  | 0.52 | NA   | NA   | NA   | NA   |
| Jmjd2c  | 0    | NA   | NA   | NA   | NA   |
| Jmjd4   | NA   | 0    | 1.62 | NA   | 0.68 |
| Jmjd5   | NA   | NA   | NA   | NA   | 2.21 |
| Jmjd6   | NA   | 0.94 | 1.77 | 1.09 | 2.96 |
| Jmjd7   | NA   | 0.43 | 0.55 | NA   | NA   |
| Jmjd8   | NA   | NA   | 0.28 | 0    | 0    |
| Jmy     | 0.77 | NA   | 0.8  | 0    | 0    |
| Josd1   | NA   | 1.81 | 2.31 | 1.59 | 0    |
| Josd2   | NA   | NA   | 2.95 | 1.19 | 0.43 |
| Jph1    | 1.72 | NA   | 2.76 | 2.89 | 2.59 |
| Jph2    | 0.44 | 2.37 | 0    | 0.75 | 1.53 |
| Jph3    | 0.39 | 1.33 | 0.8  | 0.84 | 2.9  |
| Jph4    | 0    | NA   | 0    | 3.89 | 7.82 |
| Jpx     | NA   | NA   | 1.91 | NA   | NA   |
| Jrk     | 0.41 | 0.07 | 0.39 | 0.68 | 0    |
| Jsrp1   | NA   | NA   | 2.75 | 1.85 | 7.64 |
| Jtb     | 1.24 | 2.6  | 1.76 | 0    | 0    |
| Jtv1    | 0    | NA   | NA   | NA   | NA   |
| Jub     | 0.78 | NA   | NA   | NA   | 4.91 |
| Jun     | 0.07 | 2.19 | 2.63 | 0.27 | 1.91 |
| Junb    | 0.81 | 1.09 | 2.18 | 0.15 | 0    |

|         |      |      |      |      |      |
|---------|------|------|------|------|------|
| Jund    | NA   | 0    | 0.97 | 0    | 0    |
| Jup     | 4.12 | 0.22 | 0.3  | 0    | 0.99 |
| Kalrn   | NA   | 0.51 | 0.4  | 2.67 | 0    |
| Kank1   | NA   | 0.65 | 0.34 | 0    | 0.78 |
| Kank2   | NA   | 1.88 | 1.76 | 0    | 1.75 |
| Kank3   | NA   | 1.53 | 1.3  | 1.42 | 3.31 |
| Kank4   | NA   | NA   | 1.31 | 1.11 | 9.02 |
| Kansl1  | NA   | NA   | 1.9  | 2.53 | NA   |
| Kansl11 | NA   | 0    | 1.06 | 0    | NA   |
| Kansl2  | NA   | 0.05 | 1.78 | 3.91 | NA   |
| Kansl3  | NA   | 0.94 | 1.25 | 3.19 | NA   |
| Kars    | 0.5  | 1.74 | 1.39 | 0.93 | NA   |
| Kat2a   | NA   | 0.24 | 0    | 0.3  | 0    |
| Kat2b   | NA   | 0.74 | 0.13 | 1.65 | 0.76 |
| Kat5    | NA   | 1.86 | 1.28 | 0.32 | 0    |
| Kat6a   | NA   | 0.91 | 0.68 | 1.66 | NA   |
| Kat6b   | NA   | 0    | 0.88 | 0    | NA   |
| Kat7    | NA   | 0    | 0.87 | 0    | NA   |
| Kat8    | NA   | 1.19 | 1.9  | NA   | NA   |
| Katna1  | 0    | 1.61 | 8.2  | 0    | 5    |
| Katnal1 | 0.44 | NA   | 0.76 | 1.14 | 0    |
| Katnal2 | NA   | NA   | 0.18 | 1.25 | 1.48 |
| Katnb1  | 0    | 0.09 | 1.02 | 0.25 | 0    |
| Katnb11 | NA   | 1.73 | 1.14 | NA   | NA   |
| Kazald1 | 3.22 | 1.69 | 1.8  | 1.47 | 0.88 |
| Kazn    | NA   | 0.67 | 0.59 | 1.84 | NA   |
| Kbtbd10 | NA   | NA   | NA   | NA   | 4.69 |
| Kbtbd11 | NA   | 0.46 | 0    | 1.79 | 2.16 |
| Kbtbd12 | NA   | NA   | 0.97 | 0.77 | NA   |
| Kbtbd13 | NA   | NA   | NA   | 1.12 | NA   |
| Kbtbd2  | 0.84 | 1.87 | 2.06 | 0.69 | 0    |
| Kbtbd3  | 0    | NA   | 2.47 | 0.7  | 0    |
| Kbtbd4  | 1.5  | 1.16 | 1.29 | NA   | 1.2  |
| Kbtbd5  | 0.63 | NA   | NA   | NA   | NA   |
| Kbtbd7  | NA   | NA   | 1.72 | 0    | 0    |
| Kbtbd8  | NA   | NA   | 0.49 | 1.3  | 1.17 |
| Kbtbd9  | 0.98 | NA   | NA   | NA   | NA   |
| Kcmf1   | 0.71 | 1.97 | 1.62 | 3.66 | 0.89 |
| Kcna1   | 0.33 | 0.86 | 0.7  | 1.47 | 0.9  |
| Kcna10  | 2.23 | NA   | NA   | 3.66 | NA   |
| Kcna2   | 1.63 | 2.13 | 0.8  | 1.13 | 2.99 |

|        |      |      |      |      |      |
|--------|------|------|------|------|------|
| Kcna3  | 0.05 | 0    | 1.13 | 0.9  | 1.85 |
| Kcna4  | 1.75 | 1.33 | 0.86 | 2.23 | 1.08 |
| Kcna5  | 1.27 | 1.61 | 0.87 | 1.97 | 1.39 |
| Kcna6  | 0    | 1.72 | 1.76 | 2.96 | 1.68 |
| Kcna7  | 0.61 | NA   | 3.56 | 1.94 | 2.25 |
| Kcnab1 | 0    | 0.8  | 0.77 | 0.06 | 1.06 |
| Kcnab2 | 1.07 | 0.22 | 1.07 | 0    | 1.2  |
| Kcnab3 | 0    | 2.39 | 1.31 | 0.28 | 0    |
| Kcnb1  | 0.05 | 1.49 | 0    | 0.35 | 0.39 |
| Kcnb2  | NA   | NA   | NA   | 0.65 | NA   |
| Kcnc1  | 0.9  | 0.17 | 0.01 | 2.88 | 0.82 |
| Kcnc2  | NA   | 1.42 | 1.4  | 0.18 | 2.74 |
| Kcnc3  | 1.47 | 0.96 | 0    | 1.93 | 0    |
| Kcnc4  | 0    | 1.32 | 0.74 | 2.11 | 1.95 |
| Kcnd1  | 1.24 | 2.66 | 0.32 | 0.62 | 4.22 |
| Kcnd2  | 0.91 | 0    | 0.47 | 0.82 | 1.57 |
| Kcnd3  | 0.19 | 0.3  | 1.66 | 0.82 | 1.19 |
| Kcne1  | NA   | 2.07 | 0    | 1.9  | 5.39 |
| Kcne11 | 0.67 | 1.41 | 0    | 2.07 | 0    |
| Kcne2  | 0.65 | 1.08 | 0.67 | 1.2  | 1.62 |
| Kcne3  | 0.76 | NA   | 1.43 | 3.05 | 0    |
| Kcne4  | 0.59 | 0    | 1.67 | 1.95 | 0    |
| Kcnf1  | 0    | 1.01 | 1.7  | 2.31 | 8.21 |
| Kcng1  | NA   | 0    | 1.65 | 2.04 | 1.93 |
| Kcng2  | NA   | 1.92 | 1    | 2    | 0    |
| Kcng3  | 0.36 | NA   | NA   | 1.97 | NA   |
| Kcng4  | 0.26 | NA   | 2.14 | 1.09 | NA   |
| Kcnh1  | 0    | 1.82 | 1.26 | 2.09 | 2.54 |
| Kcnh2  | 1.64 | 1.16 | 1.18 | 1.98 | NA   |
| Kcnh3  | 1.5  | NA   | 2.03 | 0.93 | 0.77 |
| Kcnh4  | NA   | NA   | NA   | 0.07 | NA   |
| Kcnh5  | NA   | NA   | 0.68 | 1.43 | 0    |
| Kcnh6  | NA   | NA   | NA   | 7.39 | NA   |
| Kcnh7  | 0    | NA   | 0.7  | 5.94 | 0    |
| Kcnh8  | 1.26 | NA   | 1.16 | 5.58 | NA   |
| Kcnip1 | 3.22 | 0.91 | 0.02 | 0.89 | 2.74 |
| Kcnip2 | 0    | 1.53 | 0.11 | 0.31 | 1.1  |
| Kcnip3 | NA   | NA   | 0.26 | 0.3  | 0    |
| Kcnip4 | 0    | NA   | 0.8  | 4.34 | 1.26 |
| Kcnj1  | 1.13 | 0.8  | 0    | 0    | 2.07 |
| Kcnj10 | 1.05 | 1.57 | 2.13 | 3.46 | 0    |

|          |      |      |      |      |      |
|----------|------|------|------|------|------|
| Kcnj11   | 0.95 | NA   | 0    | 0    | 1.45 |
| Kcnj12   | 0    | 2.81 | 1.86 | NA   | 1.4  |
| Kcnj13   | NA   | 1.12 | 0.24 | 4.74 | 0    |
| Kcnj14   | 0.46 | 2.5  | 2.97 | 1.96 | 4.58 |
| Kcnj15   | 1.14 | 0    | 0.95 | 1.17 | 0    |
| Kcnj16   | 0.11 | 0    | 1.08 | 2.68 | 2.73 |
| Kcnj2    | 0    | 0    | 3.47 | 0    | 0    |
| Kcnj3    | 0.65 | 0.85 | 0.37 | 1.49 | 3.23 |
| Kcnj4    | 2.33 | 0.93 | 0.21 | 0.68 | 6.42 |
| Kcnj5    | 3.48 | 1.02 | 0.39 | 0.6  | 2.08 |
| Kcnj6    | 0.58 | 0.98 | 1.17 | 0.74 | 1.68 |
| Kcnj8    | 0    | 1.04 | 0.79 | 1.91 | 0    |
| Kcnj9    | 0.71 | 0.29 | 0    | 0.53 | 2.73 |
| Kcnk1    | 0    | 0.38 | 1.45 | 1.73 | 1.13 |
| Kcnk10   | NA   | 3.02 | 2.23 | 1.4  | 0    |
| Kcnk12   | 1.04 | 0    | 1.75 | 1.83 | 2.32 |
| Kcnk13   | 1.27 | 0.88 | 1.42 | 0.1  | 3.4  |
| Kcnk15   | NA   | 1.3  | 0.56 | 1.26 | 12.6 |
| Kcnk16   | 1.13 | NA   | 2.88 | 0.05 | 1.72 |
| Kcnk18   | NA   | NA   | NA   | 0.94 | NA   |
| Kcnk2    | 0.34 | 1.67 | 5.82 | 0.54 | 4.93 |
| Kcnk3    | 0.63 | 1.16 | 0.01 | 1.23 | 0    |
| Kcnk4    | 0.47 | NA   | 0.04 | 0.98 | 3.18 |
| Kcnk5    | 0.44 | 2.74 | 0.36 | 1.59 | 3.54 |
| Kcnk6    | 0    | NA   | 0    | 0.39 | 0.47 |
| Kcnk7    | 7.99 | 2.01 | 0.92 | 0.84 | 0    |
| Kcnk9    | NA   | NA   | NA   | 1.45 | NA   |
| Kenma1   | 0.97 | 0    | 0.9  | 0    | 0    |
| Kenmb1   | 1.53 | 1.11 | 0    | 0.02 | 1.39 |
| Kenmb2   | 0.21 | 0.35 | 0.2  | 1.38 | 0    |
| Kenmb3   | NA   | NA   | NA   | 3.94 | NA   |
| Kenmb4   | 0.86 | 0.09 | 1.1  | 2.03 | NA   |
| Kcnn1    | 0.9  | 2.64 | 1.47 | 1.44 | 0    |
| Kcnn2    | 0.39 | 1.82 | 1.75 | 1.7  | 0    |
| Kcnn3    | 1.72 | 1.1  | 0.39 | 0.15 | 0    |
| Kcnn4    | 0.58 | 0.14 | 1.6  | 4.16 | 0.1  |
| Kcnq1    | 0.43 | 1.01 | 4.46 | 1.38 | 0.03 |
| Kcnq1ot1 | NA   | NA   | 0.58 | NA   | 0.95 |
| Kcnq2    | 0.4  | 0.15 | 0.53 | 0.54 | 1.42 |
| Kcnq3    | 1.83 | 1.36 | 2.53 | 1.46 | 0    |
| Kcnq4    | 0.61 | 2.71 | 1.58 | 2.78 | 0    |

|        |      |      |      |      |      |
|--------|------|------|------|------|------|
| Kcnq5  | 2.8  | NA   | 0.65 | 0    | 0.28 |
| Kcnrg  | 3.06 | NA   | NA   | 3.05 | NA   |
| Kcns1  | 0.6  | 1.1  | 4.25 | 0.54 | 0    |
| Kcns2  | 0    | NA   | 1.29 | 0.1  | 2.79 |
| Kcns3  | 0    | 0.67 | 1.19 | 1.03 | 0    |
| Kcnt1  | NA   | NA   | 0.97 | 0.66 | NA   |
| Kcnt2  | NA   | NA   | 0    | 1.81 | 2.47 |
| Kenu1  | NA   | NA   | 1.16 | NA   | 4.86 |
| Kcnv1  | 0.92 | 0.72 | 0.45 | 0.52 | 1.3  |
| Kcnv2  | 4.38 | 0.25 | 1.54 | 0.92 | 2.59 |
| Kcp    | NA   | NA   | 1.05 | 1.36 | 0    |
| Kctd1  | 2.03 | NA   | 0.51 | 0.49 | 0.65 |
| Kctd10 | 0.38 | NA   | 1.27 | 0    | 3.35 |
| Kctd11 | 4.34 | NA   | 1.28 | NA   | 0    |
| Kctd12 | 0.82 | 0.34 | 0.55 | 1.49 | 8.42 |
| Kctd13 | 0.72 | 1.98 | 1.14 | 2.15 | 1.47 |
| Kctd14 | NA   | 1.23 | 0.8  | 0.12 | 1.73 |
| Kctd15 | 0.74 | 0.95 | 0    | 3.08 | 0.7  |
| Kctd16 | 3.45 | NA   | 1.9  | 0.9  | 0    |
| Kctd17 | NA   | 0.64 | 1.71 | 1.75 | 1.1  |
| Kctd18 | NA   | NA   | 1.75 | 0.55 | 4.03 |
| Kctd19 | NA   | NA   | NA   | 0.79 | NA   |
| Kctd2  | 0.65 | 2.13 | 1.61 | 0.7  | 1.4  |
| Kctd20 | NA   | 1.4  | 0.4  | 0    | 1.2  |
| Kctd21 | NA   | NA   | 3.26 | NA   | 0.51 |
| Kctd3  | 0.79 | 1.22 | 0    | 1.85 | 1.65 |
| Kctd4  | 0    | NA   | 1.91 | 2.07 | 0    |
| Kctd5  | 0    | 1.29 | 0.84 | 1.11 | 0    |
| Kctd6  | 0.33 | NA   | 4.74 | 0.13 | 0.22 |
| Kctd7  | 0    | 0.2  | 1.16 | 0    | 0    |
| Kctd8  | 0.62 | NA   | NA   | 0.6  | NA   |
| Kctd9  | 0.5  | 1.88 | 3.47 | 0.59 | 0    |
| Kdelc1 | 1.23 | 3.01 | 1.57 | 2.13 | 0.73 |
| Kdelc2 | NA   | NA   | 1.88 | 0    | 0.02 |
| Kdelr1 | 0    | 1.76 | 1.09 | 0.33 | 0    |
| Kdelr2 | 0    | 1.09 | 0.68 | 2.88 | 0    |
| Kdelr3 | 0.64 | 1.23 | 1.41 | 0.94 | 0.7  |
| Kdm1a  | NA   | 0    | 1.48 | 0.01 | NA   |
| Kdm1b  | NA   | NA   | 1.71 | 2.34 | NA   |
| Kdm2a  | NA   | 0.37 | 1.24 | 0.46 | 0    |
| Kdm2b  | NA   | NA   | 3.24 | 1.45 | 0    |

|           |      |      |      |      |       |
|-----------|------|------|------|------|-------|
| Kdm3a     | NA   | 0.08 | 1.12 | 0.13 | 3.3   |
| Kdm3b     | NA   | 0.84 | 1.16 | 0    | 0     |
| Kdm4a     | NA   | 0    | 0.94 | 0    | 1.17  |
| Kdm4b     | NA   | 2.91 | 1.45 | 0.46 | 1.56  |
| Kdm4c     | NA   | 0    | 0.79 | 0    | 0     |
| Kdm4d     | NA   | 2.67 | 1.01 | 1.06 | 13.88 |
| Kdm5a     | NA   | 1.04 | 0.37 | 0    | 0.49  |
| Kdm5b     | NA   | 0.52 | 0.64 | 0    | 1.27  |
| Kdm5c     | NA   | 0.74 | 0.25 | 0    | 0.72  |
| Kdm5d     | NA   | 1.45 | 2.37 | 3.95 | 0     |
| Kdm6a     | NA   | 0.6  | 1.79 | 0    | 0     |
| Kdm6b     | NA   | 2.97 | 3.46 | 1.45 | 0     |
| Kdm8      | NA   | 0.04 | 1.43 | 0.77 | NA    |
| Kdr       | 0.51 | 1.54 | 1.34 | 1.23 | 0     |
| Kdsr      | NA   | 1.56 | 2    | 0.44 | 0     |
| Keap1     | 1.01 | 0.8  | 1.87 | 1.46 | 0     |
| Kel       | 1.28 | 1.32 | 0.21 | 1.76 | 1.61  |
| Kera      | 4    | 0.08 | 0.69 | 0.73 | 1.55  |
| Khdrbs1   | 0.25 | 0.94 | 0.72 | 0.96 | 0.1   |
| Khdrbs2   | 0.14 | 0.79 | 1.3  | 1.96 | 2.62  |
| Khdrbs3   | 0.51 | 2.41 | 1.68 | 1.09 | 0.07  |
| Khk       | 0.14 | 0.7  | 2.07 | 0.7  | 2.05  |
| Khyn      | NA   | 0.87 | 0.2  | 0    | NA    |
| Khsrp     | 0    | 0    | 0.11 | 1.28 | 1.15  |
| Kidins220 | NA   | 1.09 | 0.72 | 0    | 0.9   |
| Kif11     | 0    | 0.27 | 1.9  | 0.74 | 1.36  |
| Kif12     | 0.54 | NA   | 0.14 | 0.01 | 0     |
| Kif13a    | 0.52 | 0    | 0.89 | 0.22 | 0.74  |
| Kif13b    | 0.17 | 0    | 0.44 | 0.01 | 3.25  |
| Kif14     | 1.79 | 0    | 0.43 | 0.13 | 0     |
| Kif15     | NA   | 1.29 | 0.64 | 0.01 | 5.71  |
| Kif16b    | NA   | 1.44 | 0.24 | 0    | 0.35  |
| Kif17     | 0.53 | 1.46 | 0    | 0    | 0     |
| Kif18a    | 0.18 | 1.43 | 0.74 | 0.69 | 0     |
| Kif18b    | NA   | 0.05 | 1.96 | 0    | 3.29  |
| Kif1a     | 0.64 | 1.24 | 0.15 | 0    | 0     |
| Kif1b     | 0.53 | 0    | 1.18 | 1.79 | 0     |
| Kif1c     | 0.71 | 1.25 | 0.58 | 2.07 | 2.17  |
| Kif20a    | 2.31 | 0.84 | 3.48 | NA   | 0     |
| Kif20b    | NA   | 1.25 | 1.87 | 0.91 | 0.39  |
| Kif21a    | 0.32 | NA   | 0.55 | 4.03 | 0     |



|         |      |      |      |      |       |
|---------|------|------|------|------|-------|
| Kif21b  | 0.4  | 0    | 0.59 | 1.34 | 1     |
| Kif22   | 0.16 | 1.39 | 4.38 | 0.03 | 2     |
| Kif23   | 0.57 | 0.88 | 0.98 | 0    | 0.56  |
| Kif24   | 1.49 | 1.97 | 0.6  | 0    | 0.82  |
| Kif26a  | NA   | NA   | 1.32 | 0.43 | 2.23  |
| Kif26b  | NA   | 0.01 | 0.48 | 0.23 | 3.89  |
| Kif27   | 0.27 | NA   | 1.19 | 3.53 | 0.77  |
| Kif2a   | 1.1  | 0.46 | 0.75 | 0.84 | 0     |
| Kif2b   | 0    | NA   | 0.05 | 3.97 | 5.92  |
| Kif2c   | 1.96 | 0    | 2.31 | 0    | 0     |
| Kif3a   | 0.26 | 1.02 | 1.58 | 0    | 0     |
| Kif3b   | 0    | 1.19 | 1.01 | 0.63 | 1.82  |
| Kif3c   | 1.25 | 2.91 | 2.01 | NA   | 0     |
| Kif5a   | 0.7  | 0.44 | 0.24 | 0    | 0     |
| Kif5b   | 0.59 | 0    | 1.87 | 0    | 0.92  |
| Kif5c   | 1.15 | 0    | 0.83 | 0.71 | 0.69  |
| Kif6    | NA   | NA   | 0.28 | 1.37 | 5.66  |
| Kif7    | 0.29 | NA   | 2.33 | 0.55 | 1.39  |
| Kif9    | 0.47 | NA   | 2.48 | 1.13 | NA    |
| Kifap3  | 0    | 0    | 1.69 | 0.26 | 0     |
| Kifc1   | 1.09 | NA   | NA   | 0    | 0     |
| Kifc2   | 0.75 | NA   | 0.71 | 1.54 | 0     |
| Kifc3   | 1.14 | 3.39 | 1.44 | 2.22 | 12.86 |
| Kin     | 0.34 | 2.88 | 1.06 | 0.67 | 1.09  |
| Kir3dl1 | 1.11 | NA   | NA   | NA   | NA    |
| Kirrel  | NA   | 1.1  | 1.48 | 9.01 | 3.19  |
| Kirrel2 | 0.47 | NA   | NA   | 0.29 | NA    |
| Kirrel3 | 3.39 | NA   | 0.42 | 1.09 | 0     |
| Kiss1   | 0.2  | NA   | NA   | 1.29 | NA    |
| Kiss1r  | NA   | NA   | 5.67 | 0.85 | 5.07  |
| Kit     | 1.86 | 1.56 | 1.25 | 1.11 | 0.65  |
| Kl      | 0    | 1.38 | 1.17 | 3.28 | 0     |
| Klb     | NA   | NA   | 0.71 | 0.92 | 0.13  |
| Klc1    | NA   | 1.06 | 0.56 | 0.03 | 1.05  |
| Klc2    | 0.36 | 0    | 1.61 | 0    | 0     |
| Klc3    | NA   | NA   | 1.65 | 0.95 | 0     |
| Klc4    | NA   | NA   | 2.74 | 1.15 | 0.79  |
| Klf1    | 1.18 | 0.52 | 2.5  | 0.24 | 0     |
| Klf10   | NA   | 2.72 | 3.2  | 0    | 0     |
| Klf11   | NA   | 0    | 0.66 | 1.73 | 1.67  |
| Klf12   | 0.47 | 0    | 0.74 | 0    | 1.16  |

|         |      |      |      |      |      |
|---------|------|------|------|------|------|
| Klf13   | 0    | 0.88 | 1.08 | 5.21 | 1.73 |
| Klf14   | NA   | NA   | 0    | 2.33 | NA   |
| Klf15   | 3    | 2.66 | 0.91 | 0.8  | 1.21 |
| Klf16   | 3.18 | NA   | 0    | 2.23 | 0.89 |
| Klf17   | NA   | NA   | 0.35 | 2.47 | NA   |
| Klf2    | 0.19 | 0    | 1.98 | 0.9  | 0.16 |
| Klf3    | 1.19 | 0    | 1.22 | NA   | 0    |
| Klf4    | 0.75 | 1.72 | 2.99 | 0.73 | 1.97 |
| Klf5    | 0.5  | 0.14 | 0.6  | 3.23 | 0    |
| Klf6    | NA   | 0.12 | 1.67 | 1.18 | 0    |
| Klf7    | 1.56 | 0.37 | 0.27 | 0    | 0    |
| Klf8    | 1.86 | NA   | NA   | 4.08 | NA   |
| Klf9    | NA   | 0.63 | 1.19 | 0.39 | 0.57 |
| Klhdc1  | 0    | NA   | 0.76 | 0.75 | NA   |
| Klhdc10 | NA   | 0    | 1.26 | 0    | 0    |
| Klhdc2  | 0.26 | 1.11 | 1.55 | 0.01 | 5.09 |
| Klhdc3  | 0.85 | 0.91 | 0.68 | 0.01 | 2.24 |
| Klhdc4  | 0    | 1.99 | 0.38 | 2.2  | 0.27 |
| Klhdc5  | NA   | NA   | NA   | NA   | 0    |
| Klhdc7a | NA   | NA   | 1.68 | 1.38 | NA   |
| Klhdc7b | NA   | NA   | NA   | 0.74 | NA   |
| Klhdc8a | NA   | 2.59 | 0.26 | 0.18 | 1.61 |
| Klhdc8b | NA   | NA   | 0.68 | 1.78 | 4.39 |
| Klhdc9  | NA   | NA   | 1.43 | 0    | 1.22 |
| Klh1    | 2.96 | 0.3  | 0.93 | 0    | 2.93 |
| Klh10   | 2.15 | NA   | 0.21 | 8.21 | NA   |
| Klh11   | 0.75 | 2.12 | 0.39 | 2.52 | 0    |
| Klh12   | 0    | 1.2  | 3.59 | 0.66 | 0    |
| Klh13   | 2.83 | NA   | 1.62 | 3.08 | 1.2  |
| Klh14   | NA   | NA   | 2.21 | 0    | 0    |
| Klh15   | 0.65 | NA   | 0.52 | 3.07 | 0.95 |
| Klh17   | 0    | NA   | 5.3  | 0    | 0    |
| Klh18   | 0    | 0.14 | 0.65 | 2.28 | 1.17 |
| Klh12   | 0.66 | 0.59 | 2.56 | 2.31 | 0    |
| Klh120  | NA   | 0.46 | 0.4  | 0    | 0    |
| Klh121  | NA   | 0.06 | 1.5  | 0.78 | 0    |
| Klh122  | NA   | 0    | 0    | 0.02 | 0    |
| Klh123  | NA   | 1.86 | 0    | NA   | 0    |
| Klh124  | NA   | 1.01 | 0.51 | 0.52 | 1.94 |
| Klh125  | NA   | 0.22 | 0.82 | 1.89 | 2.01 |
| Klh126  | NA   | 2.28 | 0.57 | 0.1  | 0.84 |

|        |      |      |      |      |      |
|--------|------|------|------|------|------|
| Klh128 | NA   | 0    | 1.39 | 1.15 | 0    |
| Klh129 | NA   | 0.49 | 2.17 | 1.32 | 3.07 |
| Klh13  | NA   | NA   | NA   | 0    | NA   |
| Klh130 | NA   | NA   | NA   | 1.63 | NA   |
| Klh131 | NA   | NA   | NA   | 0.57 | NA   |
| Klh132 | NA   | NA   | 0    | 0.43 | NA   |
| Klh133 | NA   | NA   | NA   | 1.53 | NA   |
| Klh134 | NA   | NA   | NA   | 1.08 | NA   |
| Klh135 | NA   | 0.24 | 1.68 | 1.39 | 0    |
| Klh136 | NA   | 1.62 | 1.24 | 0.33 | 0.07 |
| Klh138 | NA   | NA   | NA   | 3.56 | NA   |
| Klh14  | 1.55 | 1.21 | 0.65 | 1.72 | 0    |
| Klh140 | NA   | NA   | 0.37 | 1.96 | NA   |
| Klh141 | NA   | 1.2  | 1.76 | 0    | NA   |
| Klh142 | NA   | NA   | 1.17 | 2.81 | NA   |
| Klh15  | 0.66 | 0    | 0.77 | 0.31 | 2.44 |
| Klh16  | 0.89 | NA   | 2.6  | 3.63 | 4.41 |
| Klh17  | 0.29 | 0.41 | 1.52 | 0.12 | 0    |
| Klh18  | 2.5  | NA   | 0.4  | 0.57 | 1.62 |
| Klh19  | NA   | 0    | 0.38 | 0    | 0    |
| Klk1   | 0.38 | 1.14 | 1.06 | NA   | 1.18 |
| Klk10  | 0.7  | 0.63 | 0.94 | 1.36 | 5.25 |
| Klk11  | 0.73 | 0    | 1.6  | 2.14 | 0    |
| Klk12  | 4.07 | 0.53 | 0.95 | 2.01 | 3.58 |
| Klk13  | 8.72 | NA   | NA   | 1.25 | NA   |
| Klk14  | 1.19 | NA   | NA   | 1.83 | NA   |
| Klk15  | 1.26 | NA   | NA   | 2.36 | NA   |
| Klk4   | 0.4  | NA   | 3.16 | 0.67 | 4.85 |
| Klk5   | 0.92 | 1.93 | 2.68 | 0.78 | 0    |
| Klk6   | 1.11 | 1.05 | 0.03 | 2.12 | 0    |
| Klk7   | 2.21 | 0.88 | 1.66 | 0.83 | 0    |
| Klk8   | 0.69 | 2.21 | 1.65 | NA   | 0    |
| Klk9   | 1.86 | NA   | 1.98 | 1.08 | NA   |
| Klkb1  | 2.79 | 2.26 | 3.66 | NA   | 0.62 |
| Klra1  | 0.4  | NA   | NA   | NA   | 0.42 |
| Klrb1  | NA   | NA   | NA   | 0.83 | NA   |
| Klrc1  | 3.31 | NA   | NA   | 0    | NA   |
| Klrc2  | 0    | 1.96 | 1.32 | NA   | NA   |
| Klrc3  | 0.34 | 0.94 | 1.86 | 3.17 | 2.02 |
| Klrd1  | 0.82 | 0    | 1.05 | 0.61 | 1.46 |
| Klrg1  | 0    | 0    | 2.52 | 1.59 | 4.41 |

|         |      |      |      |      |      |
|---------|------|------|------|------|------|
| Klrg2   | NA   | NA   | 0.21 | 4.92 | 0    |
| Klrk1   | 0.62 | 0.77 | 3.03 | 0.55 | 7.95 |
| Kmo     | 1.57 | 2.71 | 1.01 | NA   | 1.68 |
| Kmt2a   | NA   | 0    | 0.46 | 0.68 | NA   |
| Kmt2b   | NA   | 1.85 | 1.31 | 1.34 | NA   |
| Kmt2c   | NA   | NA   | 1.91 | 1.29 | NA   |
| Kmt2d   | NA   | 0.19 | 1.72 | 1.39 | NA   |
| Kmt2e   | NA   | NA   | 1.85 | 1.3  | NA   |
| Kncn    | NA   | NA   | NA   | 4.12 | NA   |
| Kndc1   | NA   | NA   | 0.89 | 2.24 | 1.9  |
| Kng1    | 0.81 | 1.84 | 0    | 2.86 | 3.41 |
| Knop1   | NA   | 1.44 | 1.41 | 0.95 | NA   |
| Kns2    | 0.38 | NA   | NA   | NA   | NA   |
| Knstrn  | NA   | NA   | 1.59 | 0.09 | NA   |
| Kntc1   | 0.07 | 0.38 | 3.06 | 0.11 | 1.33 |
| Kpna1   | 1.16 | 1.5  | 1.31 | 0.5  | 1.83 |
| Kpna2   | 0.29 | 1.12 | 1.55 | 0    | 0.88 |
| Kpna3   | 0.67 | 1.64 | 0.38 | 0.21 | 0    |
| Kpna4   | 4.02 | 0    | 0.36 | 0.21 | 0    |
| Kpna6   | 0.76 | 1.02 | 0.71 | 0    | 0    |
| Kpna7   | NA   | NA   | NA   | 2.4  | NA   |
| Kpnb1   | 0.52 | 1.32 | 0.43 | 1.8  | 0    |
| Kprp    | NA   | NA   | NA   | 1.61 | NA   |
| Kptn    | 0.56 | 2.99 | 0.61 | 1.37 | 1.99 |
| Kras    | NA   | 0    | 0.14 | NA   | 0    |
| Krbal   | NA   | NA   | 2.68 | 1.36 | 0    |
| Krcc1   | NA   | 0.64 | 1.44 | 0.92 | 1.63 |
| Kremen1 | NA   | NA   | 0.06 | 0.83 | 0    |
| Kremen2 | 1.6  | NA   | NA   | 1.69 | NA   |
| Kri1    | NA   | 2.14 | 0.71 | NA   | 5.35 |
| Krit1   | NA   | 0.05 | 0.9  | 1.13 | 0    |
| Krr1    | NA   | 0.89 | 1.6  | NA   | 0    |
| Krt1    | NA   | 2.06 | 0.12 | 2.09 | 0    |
| Krt10   | NA   | 0.22 | 1.09 | 0    | 6.88 |
| Krt12   | NA   | 2.37 | 0.86 | 1.11 | 2.44 |
| Krt13   | NA   | 1.12 | 0    | 1.29 | 0    |
| Krt14   | NA   | 0.15 | 0.32 | 3.93 | 2.4  |
| Krt15   | NA   | 1.44 | 1.07 | 1.3  | 0    |
| Krt16   | NA   | 1.07 | 1.63 | 2.18 | 2.02 |
| Krt17   | NA   | 0.72 | 1.71 | 3.64 | 1.51 |
| Krt18   | NA   | 2    | 0.74 | 1.11 | 0.36 |

|        |      |      |      |      |       |
|--------|------|------|------|------|-------|
| Krt19  | NA   | 1.22 | 1.61 | 1.51 | 0     |
| Krt2   | NA   | 0.84 | 0.78 | 0.06 | 0     |
| Krt20  | 0.35 | 1.51 | 2.26 | 0.99 | 9.17  |
| Krt222 | NA   | NA   | 0.91 | 0.62 | 1.27  |
| Krt23  | NA   | 0.7  | 2.8  | 1.92 | 0     |
| Krt24  | NA   | 1.95 | 1.29 | 2.67 | 4.95  |
| Krt25  | NA   | NA   | 0.81 | 0.01 | 0     |
| Krt26  | NA   | NA   | NA   | 1.48 | NA    |
| Krt27  | NA   | NA   | 0    | 2.8  | 0     |
| Krt28  | NA   | NA   | NA   | 0    | NA    |
| Krt31  | NA   | 0.96 | 0    | 0.5  | 1.77  |
| Krt32  | NA   | 0.48 | 3.75 | 2.24 | 0     |
| Krt33a | NA   | 1.1  | 2.71 | 0.92 | 0     |
| Krt33b | NA   | 1.55 | 0.29 | 0    | 2.63  |
| Krt34  | NA   | 0.48 | 2.99 | 2.36 | 0     |
| Krt35  | NA   | 0.43 | 1.92 | 0.46 | 0     |
| Krt36  | NA   | 0.39 | 1.4  | 0.57 | 4.8   |
| Krt39  | NA   | NA   | NA   | 1.52 | NA    |
| Krt4   | NA   | 0.66 | 0.42 | 3.32 | 2.59  |
| Krt40  | NA   | NA   | NA   | 0.69 | NA    |
| Krt5   | NA   | 1.02 | 0.42 | 0.82 | 1.72  |
| Krt6a  | NA   | 1.02 | 0    | 0.54 | 1.68  |
| Krt6b  | NA   | 0.51 | 4.48 | 1.85 | 0     |
| Krt7   | NA   | 1.1  | 0.14 | 3.7  | 10.19 |
| Krt71  | NA   | NA   | 0    | 1.88 | 0     |
| Krt72  | NA   | NA   | 1.54 | 0.36 | NA    |
| Krt73  | NA   | NA   | 0.98 | 4.05 | 1.96  |
| Krt74  | NA   | NA   | NA   | 0    | NA    |
| Krt75  | NA   | 0.55 | 0.1  | 4.06 | 0     |
| Krt76  | NA   | 0.3  | 0.53 | 3.38 | 0.28  |
| Krt77  | NA   | NA   | 0    | 2.07 | 0.77  |
| Krt78  | NA   | NA   | 0    | 1.35 | NA    |
| Krt79  | NA   | NA   | 0.02 | 0.87 | NA    |
| Krt8   | NA   | 0.6  | 0.92 | 0.22 | 0     |
| Krt80  | NA   | NA   | 2.16 | 0.87 | 4.32  |
| Krt81  | NA   | 0.21 | 1.6  | NA   | 4.16  |
| Krt82  | NA   | NA   | 1.79 | 1.6  | NA    |
| Krt84  | NA   | 0.87 | 4.01 | 1.36 | 3.4   |
| Krt85  | NA   | 1.2  | 0    | 1.4  | NA    |
| Krt86  | NA   | NA   | NA   | 1.14 | 0     |
| Krt9   | NA   | NA   | NA   | 0.68 | NA    |

|            |      |      |      |       |      |
|------------|------|------|------|-------|------|
| Krtap1-5   | NA   | NA   | 4.31 | 0     | 4.74 |
| Krtap10-10 | NA   | NA   | NA   | 2.1   | NA   |
| Krtap10-4  | NA   | NA   | NA   | 0.84  | NA   |
| Krtap11-1  | NA   | NA   | 2.34 | 0.51  | NA   |
| Krtap12-1  | 2.43 | NA   | NA   | 1.36  | NA   |
| Krtap13-1  | 2.32 | NA   | 1.35 | 0.63  | NA   |
| Krtap17-1  | NA   | NA   | 0.03 | 1.29  | 0    |
| Krtap19-1  | NA   | NA   | 1.19 | 19.39 | NA   |
| Krtap19-3  | NA   | NA   | 0.26 | 2.07  | NA   |
| Krtap19-4  | NA   | NA   | NA   | 0     | NA   |
| Krtap19-5  | NA   | NA   | NA   | 0     | NA   |
| Krtap2-4   | NA   | 0.65 | 0    | NA    | 4.27 |
| Krtap20-2  | NA   | NA   | NA   | 3.65  | NA   |
| Krtap21-1  | 0    | NA   | NA   | 2.24  | NA   |
| Krtap24-1  | NA   | NA   | NA   | 2.13  | NA   |
| Krtap26-1  | NA   | NA   | NA   | 0.81  | NA   |
| Krtap3-1   | 0    | NA   | 0.92 | 0.86  | 0    |
| Krtap3-2   | 1.45 | NA   | 3.67 | NA    | 0.04 |
| Krtap3-3   | 0.5  | NA   | 1.26 | 0     | 0    |
| Krtap4-1   | NA   | NA   | 1.77 | 1.62  | 3.99 |
| Krtap4-2   | NA   | NA   | 0.35 | 0.76  | NA   |
| Krtap4-6   | NA   | NA   | 1.66 | NA    | 0    |
| Krtap4-7   | 2.41 | 0.93 | 0    | 1.81  | 9.18 |
| Krtap5-1   | 2.45 | NA   | NA   | 0.32  | NA   |
| Krtap5-2   | NA   | NA   | 2.76 | 0.74  | NA   |
| Krtap5-3   | NA   | NA   | NA   | 0.76  | NA   |
| Krtap5-4   | 0.71 | NA   | NA   | 0.77  | NA   |
| Krtap5-5   | NA   | NA   | NA   | 1.49  | NA   |
| Krtap6-1   | 3.08 | NA   | NA   | 0.03  | NA   |
| Krtap6-2   | 0    | NA   | NA   | 2.01  | NA   |
| Krtap6-3   | 0.21 | NA   | NA   | 0.48  | NA   |
| Krtap7-1   | NA   | NA   | 2.81 | 1.67  | NA   |
| Krtap8-1   | 0    | NA   | 0.22 | 1.96  | NA   |
| Krtap9-3   | NA   | NA   | 0    | 0.53  | 0.21 |
| Krtcap2    | 1.1  | NA   | 3.58 | 0     | 0    |
| Krtcap3    | 1.66 | NA   | 1.34 | 0.73  | 0.78 |
| Krtdap     | NA   | NA   | 4.17 | 0.65  | 1.13 |
| Ksr1       | NA   | 0.11 | 0.79 | 0     | 0    |
| Ksr2       | NA   | NA   | NA   | 0.71  | NA   |
| Ktelc1     | NA   | NA   | NA   | NA    | 0    |
| Kti12      | NA   | NA   | 0.56 | 0.95  | 0    |

|         |      |      |       |      |      |
|---------|------|------|-------|------|------|
| Ktn1    | 0.7  | 0.31 | 1.05  | 0.4  | 0    |
| Kxd1    | NA   | 0.77 | 1.14  | 0    | NA   |
| Ky      | 0.21 | NA   | 0.85  | 1.06 | 0.21 |
| Kynu    | 0    | 2.21 | 0.86  | 0    | 1.99 |
| L1cam   | 0.92 | 0.73 | 0.71  | 1.11 | 0    |
| L1td1   | NA   | 0    | 2.03  | 3.98 | 1.7  |
| L2hgdh  | NA   | 1.71 | 1.37  | 0.8  | 0    |
| L3hypdh | NA   | NA   | 0     | 0.94 | NA   |
| L3mbtl  | 0.27 | NA   | NA    | NA   | NA   |
| L3mbtl1 | NA   | NA   | NA    | 0.17 | NA   |
| L3mbtl2 | 1.09 | NA   | 0     | 0.98 | 3.04 |
| L3mbtl3 | 1.31 | NA   | 0.3   | 1.33 | 0    |
| L3mbtl4 | NA   | NA   | NA    | 0.9  | NA   |
| Lacc1   | NA   | NA   | 1.51  | 0.93 | NA   |
| Lace1   | 0.72 | NA   | 1.5   | 0.71 | NA   |
| Lactb   | 0.42 | NA   | 1.64  | 1.05 | 3.31 |
| Lactb2  | 1.96 | 1.24 | 2.86  | 3.25 | 0    |
| Lad1    | 0    | 0.96 | 2.05  | 2.48 | 0    |
| Lag3    | 0    | 3.47 | 0     | 1.15 | 0    |
| Lage3   | NA   | 0.08 | 3.22  | 0.02 | 0.11 |
| Lair1   | 0.85 | 0.68 | 3.31  | 0.4  | 1.02 |
| Lalba   | 1.44 | 0.69 | 0     | 3.92 | 0    |
| Lama1   | 2.63 | 2.91 | 0.29  | 1.02 | 0    |
| Lama2   | 0.56 | 1.23 | 2.34  | 0.66 | 0    |
| Lama3   | 0.71 | 1.17 | 1.22  | 0    | 0    |
| Lama4   | 0.24 | 0.71 | 0.58  | 0    | 0    |
| Lama5   | 0    | 0.52 | 0.51  | 0.57 | 2.23 |
| Lamb1   | NA   | 1.08 | 0.07  | 5.44 | NA   |
| Lamb2   | 0.86 | 2.32 | 10.89 | 0    | 0    |
| Lamb3   | 0.07 | 2.91 | 0     | 1.12 | 0    |
| Lamc1   | 0    | 0.69 | 1.72  | 0    | 1.19 |
| Lamc2   | 0.41 | 0    | 0.75  | 0    | 2    |
| Lamc3   | 0.44 | 0.55 | 0.9   | 1.82 | 0    |
| Lamp1   | 1.75 | 0.92 | 1.18  | 2.26 | 1.91 |
| Lamp2   | 0.47 | 0.04 | 1.78  | 0    | 0    |
| Lamp3   | 7.79 | 1.55 | 0.81  | 0    | NA   |
| Lamp5   | NA   | 1.33 | 6.63  | 2.62 | NA   |
| Lamtor1 | NA   | NA   | 0.41  | 0.6  | NA   |
| Lamtor2 | NA   | 1.57 | 0.6   | 1    | NA   |
| Lamtor3 | NA   | 0    | 2.06  | 0.98 | NA   |
| Lamtor4 | NA   | NA   | 2.2   | 0.83 | NA   |

|         |      |      |      |      |      |
|---------|------|------|------|------|------|
| Lamtor5 | NA   | 0    | 1.6  | 0.49 | NA   |
| Lancl1  | 0    | 0    | 1.26 | 1    | 2.41 |
| Lancl2  | 0.59 | 0.98 | 2.12 | 0    | 0.57 |
| Lancl3  | NA   | NA   | 5.42 | 2.6  | NA   |
| Lap3    | 7    | 0.61 | 2.65 | 0.7  | 1.09 |
| Laptm4a | 0.6  | 4.15 | 2.76 | 0    | 2.98 |
| Laptm4b | 0.97 | 0.53 | 0    | 1.32 | 1.51 |
| Laptm5  | 0.15 | 1.56 | 0.72 | 6.5  | 0.1  |
| Large   | 1.09 | 1.22 | 2.4  | 1.87 | 1.35 |
| Larp1   | NA   | 2.41 | 0.67 | 1.36 | 1.74 |
| Larp1b  | NA   | NA   | 1.29 | 0.91 | 0    |
| Larp4   | NA   | 0.82 | 0.19 | 0.82 | 0    |
| Larp4b  | NA   | 0.84 | 1.08 | 0    | 2.48 |
| Larp6   | NA   | 0.66 | 0.81 | 0.46 | 0    |
| Larp7   | NA   | 0.02 | 0.85 | 0.82 | 1.06 |
| Lars    | 0    | 2.33 | 0.66 | 0.32 | 2.27 |
| Lars2   | 0    | 0.5  | 0.5  | 0.8  | 0.8  |
| Las11   | NA   | 1.17 | 1.64 | 1.45 | 0    |
| Lasp1   | 0    | 2.03 | 0.47 | 1.37 | 0    |
| Lass1   | 0.12 | NA   | NA   | NA   | NA   |
| Lass2   | 0    | NA   | NA   | NA   | 0    |
| Lass4   | 0.37 | NA   | NA   | NA   | 0    |
| Lass5   | 0.57 | NA   | NA   | NA   | 0.78 |
| Lass6   | 0.61 | NA   | NA   | NA   | 1.98 |
| Lat     | 0.95 | NA   | NA   | 0.99 | NA   |
| Lat2    | NA   | 1.83 | 1.42 | 1.5  | 1.27 |
| Lats1   | 0.78 | 1.56 | 0.47 | 0.96 | 0    |
| Lats2   | 0    | NA   | 0.36 | 2.47 | 1.77 |
| Lax1    | NA   | 0    | 1.89 | 1.33 | 2.4  |
| Layn    | NA   | NA   | 0.51 | 1.36 | 1.06 |
| Lba1    | 0    | NA   | NA   | NA   | NA   |
| Lbh     | 0.71 | 0    | 1.15 | 2.88 | 0    |
| Lbp     | 0.23 | 0.64 | 0.87 | 0.98 | 0    |
| Lbr     | 0.08 | 1.43 | 3.69 | 0.06 | 1.94 |
| Lbx1    | NA   | 2.01 | 1.25 | 0.06 | 0    |
| Lbx2    | NA   | NA   | NA   | 3.36 | NA   |
| Lca5    | NA   | NA   | 0.14 | 0.94 | 1.64 |
| Lca5l   | NA   | NA   | 1.59 | 0    | 3.08 |
| Lcat    | 0.41 | 0.76 | 0.35 | NA   | 1.42 |
| Lce1b   | NA   | NA   | 0.52 | 1.98 | NA   |
| Lce1c   | NA   | NA   | NA   | 0    | NA   |



|         |      |      |      |      |      |
|---------|------|------|------|------|------|
| Lce1d   | NA   | NA   | NA   | 1.29 | NA   |
| Lce1e   | NA   | NA   | NA   | 1.63 | NA   |
| Lce1f   | NA   | NA   | NA   | 0    | NA   |
| Lce3a   | NA   | NA   | NA   | 1.35 | NA   |
| Lce3b   | NA   | NA   | NA   | 0.96 | NA   |
| Lce3c   | NA   | NA   | NA   | 1.11 | NA   |
| Lck     | 4.58 | 0    | 0.1  | 4.84 | 2.38 |
| Lclat1  | NA   | NA   | 1.95 | 1.23 | 0    |
| Lcmt1   | 0.6  | 0    | 2.17 | 2.29 | 0    |
| Lcmt2   | 0    | 1.28 | 0.9  | 1.08 | 0    |
| Lcn10   | NA   | NA   | NA   | 2.36 | NA   |
| Lcn12   | NA   | NA   | 0    | 0.33 | 5.8  |
| Lcn2    | 0.92 | 1.66 | 2.09 | 1.45 | 0    |
| Lcn6    | NA   | NA   | NA   | 3.16 | NA   |
| Lcn8    | NA   | NA   | 0.81 | 1.25 | 3.16 |
| Lcn9    | NA   | NA   | NA   | 3.61 | NA   |
| Lcor    | NA   | NA   | 0.78 | 0    | 0.7  |
| Lcor1   | NA   | NA   | 0.63 | 0    | 0    |
| Lcp1    | 0.6  | 2.79 | 1.3  | 1.95 | 0    |
| Lcp2    | 0    | 1.49 | 0.84 | 1.58 | 0    |
| Lct     | NA   | 0.15 | 0.91 | 0.38 | 7.09 |
| Lctl    | 0.55 | NA   | NA   | 0.68 | NA   |
| Ldb1    | 0.85 | 2.72 | 1.31 | 6.17 | 1.3  |
| Ldb2    | 0.91 | 1.22 | 0.85 | 1.57 | 1.5  |
| Ldb3    | 0.29 | 0.45 | 0.83 | 0.89 | 1.83 |
| Ldha    | NA   | 0    | 1.66 | 2.37 | 0    |
| Ldhal6b | 0.98 | 1.89 | 1.78 | 0    | 8.71 |
| Ldhb    | NA   | 0.59 | 0.31 | 0    | 3.66 |
| Ldhc    | NA   | 0.19 | 0.21 | 0    | 0    |
| Ldhd    | 0.9  | NA   | 3.93 | 0.77 | 1.3  |
| Ldlr    | 0.46 | 0.02 | 1.75 | 0    | 4.18 |
| Ldlrad1 | NA   | NA   | NA   | 0.32 | NA   |
| Ldlrad2 | NA   | NA   | NA   | 1.1  | NA   |
| Ldlrad3 | NA   | NA   | 3.15 | 2.2  | 5.07 |
| Ldlrad4 | NA   | 0.57 | 0.29 | 0.37 | NA   |
| Ldlrap1 | NA   | 0    | 2.05 | 3.19 | 0    |
| Ldoc1   | NA   | 3.64 | 2.14 | 4.42 | 1.25 |
| Ldoc11  | NA   | NA   | 0.55 | 0    | 4.44 |
| Leap2   | NA   | NA   | 0    | 0.07 | NA   |
| Lect1   | 0.22 | 3.66 | 0.25 | 0.43 | 2.7  |
| Lect2   | 1.73 | 1.09 | 0    | 1.36 | 1.59 |

|          |      |      |      |      |      |
|----------|------|------|------|------|------|
| Lef1     | 0    | 0    | 0.16 | 0    | 0    |
| Lefty1   | NA   | 1.12 | 0    | 0.82 | 1.33 |
| Lefty2   | NA   | 2.58 | 1.43 | 0.64 | 0    |
| Lekr1    | NA   | NA   | 0.98 | 1.4  | NA   |
| Lelp1    | NA   | NA   | 0.79 | 1.69 | 0    |
| Lemd1    | 1.59 | NA   | 0    | 1.98 | 4.72 |
| Lemd2    | 0.12 | NA   | 2.71 | 0    | 0    |
| Lemd3    | NA   | 1.2  | 0    | 0    | 0.25 |
| Lenep    | 1.25 | NA   | NA   | NA   | 3.79 |
| Leng1    | 0.99 | NA   | 0    | 0.78 | 1.8  |
| Leng4    | 0    | NA   | NA   | NA   | NA   |
| Leng8    | 0.17 | NA   | 0.06 | 0.03 | 2.04 |
| Leng9    | 1.92 | NA   | 3.85 | NA   | NA   |
| Leo1     | NA   | NA   | 0.69 | 0.09 | 3.5  |
| Lep      | 1.87 | 2.14 | 1.18 | 1.43 | 0    |
| Lepr     | 1.45 | 0    | 0.29 | NA   | 0    |
| Lepre1   | 0    | 1.22 | 2.79 | 0.51 | 0    |
| Lepre11  | 0.82 | 1.48 | 0.52 | 1.3  | 0    |
| Lepre12  | 0.21 | 1.86 | 1.45 | NA   | NA   |
| Lepre14  | NA   | 0.27 | 1.01 | 0.23 | NA   |
| Leprot   | NA   | 0.83 | 1.66 | 1.09 | 0    |
| Leproth1 | 0    | 0.03 | 1.28 | 0    | 2.63 |
| Letm1    | 0.15 | 0.08 | 1.01 | 0.37 | 0.52 |
| Letm2    | NA   | NA   | 0.32 | 0.25 | NA   |
| Letmd1   | 0    | 0    | 0.82 | 1.4  | 0    |
| Lfng     | 0    | 0.23 | 1.23 | 1.05 | 0    |
| Lgals1   | 0.83 | 0    | 2.6  | 1.91 | 1    |
| Lgals12  | 1.19 | NA   | 1.83 | 1.56 | 0.1  |
| Lgals2   | 0.86 | 0.45 | 0.82 | 1.83 | 2.55 |
| Lgals3   | 0.1  | 3.41 | 0.29 | 1.13 | 0    |
| Lgals3bp | 0    | 1.7  | 1.78 | 0.16 | 0    |
| Lgals4   | 1.07 | 0.95 | 3.15 | NA   | 1.83 |
| Lgals7   | 0    | NA   | NA   | NA   | NA   |
| Lgals8   | 0.73 | 0.16 | 0.45 | NA   | 0    |
| Lgals9   | 0.59 | 2.03 | 3.49 | 1.84 | 0.81 |
| Lgalsl   | NA   | 2.05 | 4.06 | 0.33 | NA   |
| Lgi1     | 2.74 | 1.22 | 2.49 | 2.05 | 3.04 |
| Lgi2     | 1.07 | 0.3  | 0.76 | 0.6  | 0    |
| Lgi3     | 3.27 | NA   | 0.66 | 4.74 | 0.81 |
| Lgi4     | 1.26 | NA   | 4.95 | 1.09 | 0    |
| Lgmn     | 0.53 | 2.66 | 1.38 | 2.44 | 1    |

|        |      |      |      |      |      |
|--------|------|------|------|------|------|
| Lgr4   | NA   | 1.4  | 1.16 | 0.06 | 0    |
| Lgr5   | NA   | 1.16 | 0.09 | 0.52 | 3.17 |
| Lgr6   | 0    | NA   | 0.08 | 0.4  | 2.31 |
| Lgsn   | NA   | NA   | NA   | 1.46 | NA   |
| Lgtn   | 0.06 | NA   | NA   | NA   | 1.8  |
| Lhb    | 1.09 | 3.04 | 0.24 | 1.04 | 9.16 |
| Lhcgr  | 0.57 | 1.62 | 0    | 4.08 | 0    |
| Lhfp   | 0    | 3.03 | 2.93 | 0.87 | 0    |
| Lhfp11 | NA   | NA   | NA   | 1.88 | NA   |
| Lhfp12 | 0.65 | 0    | 2.78 | 2.27 | 0    |
| Lhfp13 | NA   | NA   | 1.33 | 2.19 | 1.27 |
| Lhfp14 | NA   | NA   | 0    | 0.68 | 2.33 |
| Lhfp15 | NA   | NA   | 1.43 | 0    | NA   |
| Lhpp   | NA   | 0    | 0.81 | 0.48 | 0.88 |
| Lhx1   | 2.46 | 0.14 | 1.59 | 0    | 5.06 |
| Lhx2   | 0    | 0    | 2.47 | 2.1  | 3.32 |
| Lhx3   | 0.18 | 1.28 | 1.53 | 0.73 | 2.18 |
| Lhx4   | 0.43 | NA   | 1.41 | 1.07 | NA   |
| Lhx5   | 4.24 | 1.85 | 0.2  | 0    | 4.16 |
| Lhx6   | 2.62 | 1.19 | 0.02 | 0.82 | 0    |
| Lhx8   | 0.82 | NA   | 0    | 0.87 | NA   |
| Lhx9   | 0.22 | NA   | 0.54 | 1.25 | NA   |
| Lias   | 0.15 | 0.32 | 0    | 0.87 | 1.71 |
| Lif    | 0.09 | 0.74 | 0.1  | 0.87 | 2.45 |
| Lifr   | 0.39 | 1.89 | 0.94 | 2.97 | 1.1  |
| Lig1   | 1.16 | 0    | 4.17 | 0.48 | 6.6  |
| Lig3   | 0    | 1.24 | 0.47 | 0    | 0.81 |
| Lig4   | 1.13 | 1.05 | 1.55 | 1.14 | 2.75 |
| Lilra5 | NA   | NA   | NA   | 0    | NA   |
| Lilrb3 | NA   | 0.21 | 4.21 | NA   | 0    |
| Lilrb4 | 0.96 | 0.51 | 0.81 | NA   | NA   |
| Lim2   | 0.34 | 1.05 | 1.22 | 0.54 | 5.34 |
| Lima1  | NA   | 2.43 | 0.63 | 3.78 | 1.98 |
| Limch1 | NA   | 0.96 | 0.18 | 0    | 2.19 |
| Limd1  | 0.62 | 0.92 | 1.1  | NA   | 1.62 |
| Limd2  | NA   | 1.52 | 2.43 | NA   | 0.7  |
| Lime1  | NA   | 0    | 1.04 | 0.89 | 5.6  |
| Limk1  | 1.28 | 0.98 | 0.54 | 1.79 | 0    |
| Limk2  | 0.57 | 0    | 0.28 | 3.8  | 0    |
| Lims1  | 0.31 | 0.82 | 2.19 | 0.25 | 0    |
| Lims2  | 1.34 | 1.43 | 1.62 | NA   | 2.54 |

|        |      |      |      |      |      |
|--------|------|------|------|------|------|
| Lin28  | 0.63 | NA   | NA   | NA   | 0.21 |
| Lin28a | NA   | 0.27 | 0    | 0.81 | NA   |
| Lin28b | NA   | NA   | 2.27 | 1.83 | 0    |
| Lin37  | NA   | 3.38 | 0.63 | 2.42 | 0    |
| Lin52  | NA   | NA   | 1.38 | 0.95 | 0    |
| Lin54  | NA   | NA   | 1.3  | 0.4  | 2.48 |
| Lin7a  | 0.43 | 2.64 | 0.3  | 1.18 | 0    |
| Lin7b  | 1.86 | 1.02 | 1.06 | NA   | 0.11 |
| Lin7c  | 1.22 | 0.94 | 1.11 | 0.18 | 2.29 |
| Lin9   | NA   | NA   | 1.1  | 0.39 | 0.86 |
| Lingo1 | NA   | NA   | 0.46 | 1.61 | 0    |
| Lingo2 | NA   | NA   | 0    | 1.5  | 1.53 |
| Lingo3 | NA   | NA   | 2.89 | 0.82 | NA   |
| Lingo4 | NA   | NA   | NA   | 1.16 | NA   |
| Lins   | NA   | 1.23 | 0.6  | 1.02 | NA   |
| Lipa   | NA   | 0    | 0.35 | 1.28 | 1.76 |
| Lipc   | 0.9  | 0.08 | 0    | 2.66 | 0.55 |
| Lipe   | 0.39 | 0.24 | 1.68 | 0    | 0    |
| Lipf   | 0.41 | 1.56 | 1.36 | 0.61 | 2.06 |
| Lipg   | 0.82 | 0.99 | 0.75 | 1.57 | 0    |
| Liph   | 0.42 | NA   | 0.46 | 3.24 | 0.12 |
| Lipi   | NA   | NA   | 0    | 0.7  | 3.89 |
| Lipk   | NA   | NA   | NA   | 0.83 | NA   |
| Lipl2  | 0    | NA   | NA   | NA   | NA   |
| Lipl3  | 3.98 | NA   | NA   | NA   | NA   |
| Lipm   | NA   | NA   | NA   | 0.24 | NA   |
| Lipn   | NA   | NA   | NA   | 1.59 | NA   |
| Lipt1  | NA   | 0.07 | 2.23 | 0    | 8.51 |
| Lipt2  | NA   | NA   | NA   | 1.8  | NA   |
| Litaf  | 0.09 | 1.96 | 2.04 | 0.46 | 0    |
| Lix1   | 0.71 | NA   | 0.78 | 1.01 | 0    |
| Lix11  | NA   | NA   | 1.39 | 0.35 | 1.85 |
| Llgl1  | NA   | 1.54 | 1.33 | 1.26 | 2.89 |
| Llgl2  | NA   | 0    | 2.5  | 0.05 | NA   |
| Llph   | NA   | 0    | 2.96 | 0.23 | 0.36 |
| Lman1  | 0.83 | 1.08 | 0.16 | 0.99 | 0    |
| Lman11 | 1.22 | 2.09 | 1.67 | 2.95 | 1.78 |
| Lman2  | 0.42 | 2.4  | 1.02 | 0.63 | 2.38 |
| Lman21 | 0    | 1.15 | 1.3  | 0.84 | 1.37 |
| Lmbr1  | 0.66 | NA   | 0.93 | 0    | 0    |
| Lmbr11 | NA   | 0    | 0.45 | 0    | 4.22 |

|           |      |      |      |      |      |
|-----------|------|------|------|------|------|
| Lmbrd1    | NA   | 2.32 | 2.88 | 1.15 | 0    |
| Lmbrd2    | NA   | NA   | NA   | 1.06 | NA   |
| Lmcd1     | 0    | 1.27 | 0.6  | 0    | 0    |
| Lmf1      | NA   | 0    | 0.07 | 0    | 0.7  |
| Lmf2      | NA   | 0.01 | 1.18 | 2.73 | 1.02 |
| Lmln      | 0.5  | NA   | 0.68 | 0    | 1.71 |
| Lmna      | 0.1  | 0.97 | 0.15 | 1.22 | 0    |
| Lmnb1     | 0.53 | 0.03 | 5.96 | 0    | 0    |
| Lmnb2     | 0.89 | 0.26 | 0.77 | 0    | 1.78 |
| Lmo1      | 1.38 | 0.59 | 2.4  | 2.76 | 3.99 |
| Lmo2      | 0.22 | 2.45 | 5.68 | 1.47 | 2.21 |
| Lmo3      | 1.21 | 2.05 | 1.32 | 0.96 | 0    |
| Lmo4      | 0.91 | 0.17 | 2.66 | 2.81 | 1.55 |
| Lmo6      | 0.71 | NA   | NA   | NA   | NA   |
| Lmo7      | 1.55 | 1.46 | 0.31 | 0.69 | 1.36 |
| Lmod1     | 0.47 | 1.27 | 0.24 | 0.77 | 0    |
| Lmod2     | NA   | NA   | 0    | 1.45 | 0    |
| Lmod3     | 4.61 | NA   | 5.17 | 2.64 | 1.99 |
| Lmtk2     | 2.39 | 1.51 | 4.5  | 0.38 | 0    |
| Lmtk3     | NA   | NA   | 0.88 | 1.19 | NA   |
| Lmx1a     | 0.28 | NA   | 0    | 0.84 | NA   |
| Lmx1b     | 4.52 | 1.42 | 1.14 | 0.75 | 3.83 |
| Lnpep     | 0    | 1.1  | 0    | 2.41 | 1.1  |
| Lnx1      | 2.33 | NA   | 0    | 1.84 | 0.65 |
| Lnx2      | 0    | NA   | 1.48 | 2.71 | 1.93 |
| Loh11cr2a | 0.63 | NA   | NA   | NA   | NA   |
| Loh12cr1  | 2.25 | NA   | 0    | 1.08 | 1.01 |
| Lonp1     | NA   | 0.07 | 3.48 | 0    | 0    |
| Lonp2     | NA   | 0    | 0.22 | 0.22 | 1.05 |
| Lonrf1    | NA   | NA   | 1.93 | 0.83 | NA   |
| Lonrf2    | NA   | NA   | 1.12 | 1.54 | 0.89 |
| Lonrf3    | NA   | 0.02 | 2.92 | 1.38 | 0.74 |
| Lor       | 0.75 | 0.99 | 0.06 | 3.18 | 2.27 |
| Lox       | 1.03 | 0.54 | 1.2  | 0.78 | 0    |
| Loxhd1    | 0    | NA   | NA   | 2.16 | NA   |
| Lox11     | 0.23 | 2.11 | 1.48 | 0    | 0    |
| Lox12     | 0.73 | 0.95 | 1.54 | 0    | 1.32 |
| Lox13     | 0.81 | 1.81 | 2.69 | NA   | 0    |
| Lox14     | 0.84 | NA   | 1.54 | 1.35 | 0    |
| Lpar1     | NA   | 0.93 | 0.76 | 2.06 | 0.67 |
| Lpar2     | NA   | 1.75 | 0.88 | 1.72 | 0    |

|        |      |      |      |       |      |
|--------|------|------|------|-------|------|
| Lpar3  | NA   | 0.93 | 1.77 | 0.81  | 0    |
| Lpar4  | NA   | 0.49 | 1.84 | 0.99  | 0    |
| Lpar5  | NA   | NA   | NA   | 1.39  | NA   |
| Lpar6  | NA   | 2.44 | 0.77 | 0.57  | 0    |
| Lpcat1 | NA   | 0.39 | 0.77 | 4.38  | 2.46 |
| Lpcat2 | NA   | NA   | 0.46 | 1     | 0    |
| Lpcat3 | NA   | 1.05 | 0.18 | 0.73  | 1.49 |
| Lpcat4 | NA   | 0    | 1.17 | 2.24  | 0    |
| Lpgat1 | NA   | 0.04 | 1.23 | 2.01  | 0.51 |
| Lphn1  | 0    | 0    | 0.54 | 1.61  | 0    |
| Lphn2  | 0    | 0.72 | 1.07 | 1.72  | NA   |
| Lphn3  | 0.29 | 0    | 0    | 0.53  | 0    |
| Lpin1  | 0    | 0    | 2.44 | 0.08  | 0    |
| Lpin2  | 0.29 | 0    | 1.66 | 0     | 0.61 |
| Lpin3  | 0    | NA   | 1.85 | NA    | 2.56 |
| Lpl    | 0.31 | 1.41 | 5.87 | 5.58  | 3.12 |
| Lpo    | 0.07 | 1.9  | 1.15 | 1.5   | 3.45 |
| Lpp    | 0    | 0.93 | 1.8  | 0.76  | 1    |
| Lpxn   | 0.3  | 0    | 1.91 | 0     | 0    |
| Lrat   | 1.3  | 1.1  | 1.21 | 1.27  | 1.3  |
| Lrba   | 0.37 | 0    | 0.6  | 0     | 0    |
| Lrch1  | NA   | 1.25 | 0.98 | 0     | 0.86 |
| Lrch2  | 3.94 | NA   | 0.88 | 3.44  | 0.53 |
| Lrch3  | 0    | 1.2  | 1.08 | 0     | 0.24 |
| Lrch4  | 0.6  | 1.17 | 0    | NA    | 0.98 |
| Lrdd   | 0.96 | NA   | NA   | NA    | 3.77 |
| Lrfn1  | NA   | NA   | 0.47 | 0.85  | 0.66 |
| Lrfn2  | 0.06 | NA   | 3.74 | 1.08  | 0    |
| Lrfn3  | 0.23 | 0    | 0.9  | 4.64  | 1.01 |
| Lrfn4  | 0    | 1.06 | 1.25 | 2.88  | 0    |
| Lrfn5  | 0.13 | NA   | 1.53 | 1.77  | 2.51 |
| Lrg1   | 0    | NA   | 3.04 | 1.73  | 0    |
| Lrguk  | NA   | NA   | 0    | 0.83  | 0    |
| Lrif1  | NA   | 1.37 | 2.74 | 2.39  | NA   |
| Lrig1  | 2.41 | 0    | 1.21 | 1.1   | 0.52 |
| Lrig2  | 1.15 | 0    | 1.31 | 0     | 0    |
| Lrig3  | 1.03 | NA   | 0    | 16.61 | 0    |
| Lrit1  | NA   | 2.11 | 0.38 | 0.68  | 1.59 |
| Lrit2  | NA   | NA   | NA   | 2.02  | NA   |
| Lrit3  | NA   | NA   | NA   | 0.55  | NA   |
| Lrmp   | 0.02 | 1.29 | 1.63 | 1.72  | 1.86 |

|         |      |      |      |      |      |
|---------|------|------|------|------|------|
| Lrp1    | 0.11 | 0.63 | 1.54 | 0    | 0.29 |
| Lrp10   | 0.31 | 2.87 | 1.19 | 1.13 | 0    |
| Lrp11   | 0.15 | NA   | 0    | 1.24 | 0    |
| Lrp12   | 1.15 | 0.48 | 0.78 | 1.11 | 1.81 |
| Lrp1b   | 0.82 | 1.72 | 0.89 | 1.05 | 0    |
| Lrp2    | 0.96 | 0.89 | 0.26 | 0.93 | 1.69 |
| Lrp2bp  | NA   | 0.6  | 0.06 | 2.54 | 2.79 |
| Lrp3    | NA   | 5.65 | 0.88 | 1.17 | 0    |
| Lrp4    | 1.86 | 1.4  | 2.32 | 2.62 | 2.98 |
| Lrp5    | 3.56 | 0.27 | 2.41 | 0.78 | 2.69 |
| Lrp6    | 1.83 | 1.42 | 0.4  | 5.93 | 0    |
| Lrp8    | 0.02 | 0.72 | 1.72 | 2.32 | 0.72 |
| Lrpap1  | 0.11 | 0    | 6.71 | 0    | 0.28 |
| Lrpprc  | 0.44 | 0    | 0.1  | 0    | 3.79 |
| Lrr1    | NA   | NA   | 3.43 | 2.29 | NA   |
| Lrrc1   | 0.41 | 0.31 | 0    | 0.72 | 2.03 |
| Lrrc10  | 0    | NA   | NA   | 2.38 | NA   |
| Lrrc14  | NA   | 2.2  | 2.36 | NA   | 0    |
| Lrrc14b | NA   | NA   | NA   | 1.12 | NA   |
| Lrrc15  | 0    | 1.6  | 0.24 | 3.24 | 1.81 |
| Lrrc16  | 0.4  | NA   | NA   | NA   | NA   |
| Lrrc16a | NA   | 0    | 2.09 | 5.29 | 0    |
| Lrrc16b | NA   | NA   | 2.34 | 0.3  | 0    |
| Lrrc17  | 0.75 | 0.28 | 0.78 | 1.92 | 0    |
| Lrrc18  | NA   | NA   | 0.81 | 1.89 | NA   |
| Lrrc19  | 0    | 2.07 | 0.62 | 0.76 | 0.05 |
| Lrrc2   | 0.55 | 1.71 | 0.89 | 5.85 | 0.77 |
| Lrrc20  | 0.45 | 0.9  | 0.7  | 0.58 | 1    |
| Lrrc21  | 0.31 | NA   | NA   | NA   | NA   |
| Lrrc22  | 0    | NA   | NA   | NA   | NA   |
| Lrrc23  | NA   | 0.97 | 1.94 | 2.71 | 2.01 |
| Lrrc24  | NA   | NA   | NA   | 0.59 | NA   |
| Lrrc25  | 0.8  | NA   | NA   | 1.49 | NA   |
| Lrrc26  | NA   | NA   | NA   | 1.86 | NA   |
| Lrrc27  | NA   | NA   | 2.57 | 1.02 | 0    |
| Lrrc28  | 0.04 | NA   | 0.59 | 0.9  | 0.58 |
| Lrrc29  | 1.79 | NA   | NA   | 0.01 | NA   |
| Lrrc3   | 0    | 0.42 | 0.9  | 1.23 | 1.75 |
| Lrrc31  | NA   | 0.53 | 1.59 | NA   | 0    |
| Lrrc32  | NA   | NA   | NA   | 1    | NA   |
| Lrrc33  | NA   | NA   | 0.75 | 0.65 | 0    |

|        |       |      |      |      |      |
|--------|-------|------|------|------|------|
| Lrrc34 | NA    | NA   | 2.58 | 1.6  | 2.07 |
| Lrrc36 | NA    | 1.09 | 2.13 | 0.9  | 0    |
| Lrrc38 | NA    | NA   | 0.35 | 0.86 | NA   |
| Lrrc39 | NA    | NA   | 0.23 | 5.11 | 0.65 |
| Lrrc3b | 10.86 | NA   | 1.4  | 2.3  | 0.59 |
| Lrrc4  | 0.54  | NA   | 0.21 | 0.12 | 0.97 |
| Lrrc40 | NA    | 0.8  | 1.78 | 0.92 | 0    |
| Lrrc41 | NA    | 0.63 | 2.26 | 2.53 | 0.33 |
| Lrrc42 | NA    | 2.02 | 2.08 | 0.45 | 0.79 |
| Lrrc43 | NA    | NA   | NA   | 0.28 | NA   |
| Lrrc45 | NA    | NA   | 2.61 | 0.77 | 0.14 |
| Lrrc46 | NA    | NA   | 1.15 | 1.14 | 0    |
| Lrrc47 | NA    | 0    | 0.57 | 2.07 | 0    |
| Lrrc48 | NA    | 1.1  | 0.76 | 0.38 | 0    |
| Lrrc49 | NA    | 1.2  | 0.76 | 0.64 | 1.58 |
| Lrrc4b | 2.13  | NA   | 0.59 | 0.65 | NA   |
| Lrrc4c | NA    | NA   | 3.61 | 1.55 | 0    |
| Lrrc50 | NA    | NA   | NA   | NA   | 0    |
| Lrrc52 | NA    | NA   | 0.86 | 1.39 | NA   |
| Lrrc55 | NA    | NA   | NA   | 0.73 | NA   |
| Lrrc56 | NA    | NA   | 0.28 | 2.97 | 1.73 |
| Lrrc57 | NA    | NA   | 0.08 | 0.05 | 2.12 |
| Lrrc58 | NA    | NA   | 1.81 | 0.96 | 0    |
| Lrrc59 | NA    | 2    | 1.13 | 0.93 | 0.9  |
| Lrrc6  | 0.25  | 0    | 0.72 | 0    | 0    |
| Lrrc61 | NA    | 2.79 | 3.24 | 2.88 | 2.91 |
| Lrrc63 | NA    | NA   | 1.56 | 2.59 | NA   |
| Lrrc66 | NA    | NA   | 1.89 | 1.47 | NA   |
| Lrrc68 | NA    | NA   | NA   | NA   | 0    |
| Lrrc69 | NA    | NA   | 0    | 0    | 4.65 |
| Lrrc7  | NA    | NA   | NA   | 0.65 | NA   |
| Lrrc71 | NA    | NA   | 1.35 | NA   | NA   |
| Lrrc73 | NA    | NA   | 2.86 | 1.6  | NA   |
| Lrrc8a | NA    | NA   | 4.9  | 1.24 | 0    |
| Lrrc8b | NA    | NA   | NA   | 1.74 | NA   |
| Lrrc8c | NA    | NA   | 1.05 | 2.3  | 2.16 |
| Lrrc8d | NA    | 3.02 | 2.82 | 0    | 7.65 |
| Lrrc8e | NA    | 1.58 | 0.83 | 0.27 | 0    |
| Lrrc9  | NA    | NA   | NA   | 1.5  | NA   |
| Lrrcc1 | NA    | NA   | 0.11 | 0.51 | 1.04 |
| Lrrd1  | NA    | NA   | NA   | 0.27 | NA   |



|         |      |      |      |      |      |
|---------|------|------|------|------|------|
| Lrrfip1 | 0    | 0.78 | 0    | 0.39 | 2.78 |
| Lrrfip2 | 0.44 | 0.97 | 2.18 | 0.9  | 0    |
| Lrriq1  | NA   | NA   | NA   | 0.26 | NA   |
| Lrriq2  | 0    | NA   | NA   | NA   | NA   |
| Lrriq3  | NA   | NA   | 0.97 | 1.8  | 1.87 |
| Lrrk1   | 2.51 | 0.07 | 0.46 | 1.92 | 0.86 |
| Lrrk2   | NA   | NA   | 1.48 | 0.67 | 1.97 |
| Lrrn1   | 0.71 | NA   | 1.4  | 0    | 0    |
| Lrrn2   | 0.29 | 0.57 | 0.25 | 1.17 | 0    |
| Lrrn3   | 0.87 | 0    | 2.14 | 1.49 | 4.22 |
| Lrrn4   | NA   | NA   | 2.52 | 4.32 | NA   |
| Lrrn4cl | NA   | NA   | 1.24 | 1.89 | NA   |
| Lrrtm1  | 0    | NA   | 0.31 | 0    | 1.94 |
| Lrrtm2  | 4.14 | 1.21 | 0.6  | 0.91 | 0.13 |
| Lrrtm3  | 2.71 | NA   | NA   | 1.69 | NA   |
| Lrrtm4  | 0.7  | 2.3  | 0.63 | 1.79 | 0.28 |
| Lrsam1  | 0.45 | NA   | 0.37 | 0    | 0    |
| Lrtm1   | NA   | 0.27 | 0.61 | 0.13 | 2.15 |
| Lrtm2   | NA   | NA   | 2.49 | 1.42 | NA   |
| Lrwd1   | NA   | NA   | 2.1  | 0.94 | 1.58 |
| Lsamp   | 0.6  | 0.68 | 0.06 | 0.48 | 2.26 |
| Lsg1    | NA   | 3.31 | 0.99 | 1.24 | 3.78 |
| Lsm1    | 0    | 2.28 | 0.69 | 1.31 | 0    |
| Lsm10   | 1.2  | NA   | 2.8  | 1.29 | 3.95 |
| Lsm11   | 1.76 | NA   | 0.78 | 4.67 | 0.82 |
| Lsm12   | NA   | 1.17 | 0.12 | 2.39 | 0    |
| Lsm14a  | NA   | 0    | 1.62 | 0    | 2.54 |
| Lsm14b  | NA   | 0    | 1.39 | 0.69 | 1.59 |
| Lsm2    | 0.46 | 1.35 | 1.47 | 0    | 3.29 |
| Lsm3    | 0.75 | 2.04 | 2.7  | 0    | 0    |
| Lsm4    | 0.21 | 1.59 | 0.01 | 0.66 | 0    |
| Lsm5    | 1.54 | 0.75 | 1.49 | 0    | 0    |
| Lsm6    | 1.42 | 1.52 | 1.09 | 0    | 1.18 |
| Lsm7    | 0.09 | 0.88 | 2.92 | 0.37 | 2.06 |
| Lsm8    | 0.11 | NA   | NA   | NA   | NA   |
| Lsmd1   | NA   | NA   | 1.57 | 0    | 0.05 |
| Lsmem1  | NA   | NA   | NA   | 0    | NA   |
| Lsp1    | 0.05 | 1.76 | 4.03 | 1.95 | 0    |
| Lsr     | NA   | 1.99 | 0.84 | 2.59 | 0    |
| Lss     | 2.33 | 1.35 | 1.26 | 0.02 | 1.11 |
| Lst1    | 0.69 | 1.41 | 3.22 | 0.81 | 0    |

|         |      |      |      |      |       |
|---------|------|------|------|------|-------|
| Lta     | 1.21 | 0.23 | 3.37 | 0    | 1.74  |
| Lta4h   | 0.4  | 0.74 | 1.82 | 0.55 | 0     |
| Ltb     | 2.89 | 0    | 1.84 | 0.85 | 1.13  |
| Ltb4dh  | 1.68 | NA   | NA   | NA   | NA    |
| Ltb4r2  | 0.07 | 0    | 0    | 0.93 | 0     |
| Ltbp1   | 0.47 | 1.63 | 0.67 | 0    | 0     |
| Ltbp2   | 0    | 1.59 | 1.67 | 0.67 | 0     |
| Ltbp3   | 0.45 | 0    | 1.51 | 0.88 | 0     |
| Ltbp4   | 0.51 | 1.03 | 2.62 | 0.73 | 1.37  |
| Ltbr    | 0.15 | 0.56 | 0.28 | 3.19 | 4.02  |
| Ltc4s   | 2.33 | 0.26 | 1.37 | NA   | 0.83  |
| Ltf     | 0.76 | 1.54 | 2.79 | 1.32 | 0     |
| Ltk     | 1.06 | 0    | 1.41 | 2.51 | 0.94  |
| Ltn1    | NA   | 0.76 | 0.78 | 0    | NA    |
| Ltv1    | NA   | NA   | 1.71 | 1.77 | 1.44  |
| Luc7l   | 0.12 | 0    | 0.32 | 0.7  | 0     |
| Luc7l2  | 0.45 | 0    | 1.2  | 1.58 | 1.45  |
| Luc7l3  | NA   | 0.21 | 0.61 | 0.75 | 0     |
| Lum     | 1.81 | 0    | 0.65 | 0.6  | 0.88  |
| Lurap1  | NA   | NA   | 1.65 | 0.78 | NA    |
| Lurap1l | NA   | NA   | 0.37 | 0.42 | NA    |
| Luzp1   | 0.72 | 2.63 | 1.09 | 1.2  | 0     |
| Luzp2   | 0.82 | 2.63 | 1.23 | 2.6  | 0     |
| Lxn     | 0.32 | 0    | 0.97 | 1.25 | 0     |
| Ly6d    | 0.17 | 1.58 | 5.6  | 2.15 | 1.68  |
| Ly6e    | 2.94 | 1.33 | 3.84 | 0.05 | 0.92  |
| Ly6g5b  | 3.28 | NA   | NA   | 3.96 | NA    |
| Ly6g5c  | 0    | NA   | NA   | 0    | NA    |
| Ly6g6c  | 2.18 | 1.34 | 0.78 | 1.2  | 1.91  |
| Ly6g6d  | 1.08 | 4.13 | 0.42 | 0.16 | 3.57  |
| Ly6g6e  | 0    | 1.36 | 0.65 | 0.43 | 21.54 |
| Ly6g6f  | NA   | NA   | NA   | 1.06 | NA    |
| Ly6h    | 0.35 | 1.33 | 2.91 | 1.33 | NA    |
| Ly6k    | NA   | NA   | 0    | 1    | 0     |
| Ly75    | 0    | 1.67 | 1.11 | 3.56 | 3.11  |
| Ly86    | 0.21 | 1.14 | 0.74 | 0.24 | 0     |
| Ly9     | 1.88 | 0    | 0.52 | 1.79 | 0     |
| Ly96    | 1.3  | 0    | 1.33 | 0.18 | 0     |
| Lyar    | 0    | NA   | 4.01 | 2.49 | 3.14  |
| Lyg1    | NA   | NA   | 2.17 | 1.22 | 0     |
| Lyg2    | NA   | NA   | 1.26 | 2.12 | NA    |

|         |      |      |      |       |       |
|---------|------|------|------|-------|-------|
| Lyl1    | 0    | 0.54 | 4.61 | 0.15  | 0     |
| Lyn     | 3.19 | 0.25 | 7.23 | 1.47  | NA    |
| Lynx1   | 0.57 | NA   | 0    | 0     | 1.82  |
| Lypd1   | NA   | 0.66 | 1.68 | 0.2   | 1.58  |
| Lypd2   | NA   | NA   | NA   | 1.48  | NA    |
| Lypd3   | NA   | 0.69 | 2.42 | 1.43  | 5.38  |
| Lypd4   | NA   | NA   | 1.1  | 0     | 2     |
| Lypd5   | NA   | NA   | 0.32 | 1.25  | 0     |
| Lypd6   | NA   | NA   | 0.72 | 0.49  | 2.33  |
| Lypd6b  | NA   | NA   | 0.2  | 1.87  | 10.33 |
| Lypd8   | NA   | NA   | 0.5  | NA    | NA    |
| Lypla1  | 0.4  | 0    | 1.21 | 0.76  | 1.69  |
| Lypla2  | 0.1  | 0.61 | 0.91 | 0.31  | 1.49  |
| Lypla3  | 0.24 | NA   | NA   | NA    | NA    |
| Lyplal1 | 0    | NA   | 1.53 | 8.61  | 0     |
| Lym1    | NA   | 2.41 | 1.06 | 3.18  | 0     |
| Lym2    | NA   | 0    | 2.01 | 0.8   | 1.09  |
| Lym4    | NA   | 0    | 1.18 | 0     | 0     |
| Lym5    | NA   | NA   | 2.31 | 1.22  | 1.94  |
| Lym7    | NA   | NA   | 1.83 | 4.26  | 16.64 |
| Lym9    | NA   | 0.56 | 0.46 | 0.12  | NA    |
| Lysmd1  | NA   | NA   | 0.28 | 1.22  | 3.25  |
| Lysmd2  | NA   | NA   | 1.83 | 0.28  | 0     |
| Lysmd3  | NA   | NA   | 1.18 | 0.47  | 1.34  |
| Lysmd4  | NA   | NA   | 2.2  | 0.71  | 0.52  |
| Lyst    | 0.24 | 0    | 0.72 | 0.22  | 0     |
| Lyve1   | NA   | 2.35 | 1.85 | 1.57  | 1     |
| Lyzl1   | 1.9  | NA   | NA   | 0.67  | NA    |
| Lyzl4   | 2.36 | NA   | 0    | 2.19  | 9.49  |
| Lyzl6   | 0.34 | 0.14 | 4.73 | 0.97  | 0     |
| Lzic    | 0    | NA   | 0.24 | 1     | 0     |
| Lztf11  | 0.44 | 1.16 | 1.04 | 0.73  | 0     |
| Lztr1   | 2.57 | 0.38 | 2.75 | 1.59  | 3.26  |
| Lzts1   | 0    | NA   | NA   | 0.45  | NA    |
| Lzts2   | 0    | NA   | 1.69 | 1.15  | NA    |
| Lzts3   | NA   | 0    | 7.4  | 3.46  | NA    |
| M1ap    | NA   | NA   | 1.98 | 12.86 | NA    |
| M6pr    | 0.98 | 1.72 | 0.52 | NA    | 4.49  |
| M6prbp1 | 0    | NA   | NA   | NA    | NA    |
| Maats1  | NA   | NA   | 0.98 | 0.94  | NA    |
| Mab2111 | 0    | 0.17 | 1.43 | 1.3   | 0     |

|          |      |      |      |      |       |
|----------|------|------|------|------|-------|
| Mab2112  | 0.56 | 1.15 | 0    | 2.56 | 1.72  |
| Mab2113  | NA   | NA   | 1.14 | 2.04 | NA    |
| Macc1    | NA   | NA   | 1.5  | 1.9  | 11.92 |
| Macf1    | 0    | 0.72 | 0.95 | 0    | 1.96  |
| Macrocl  | NA   | 0    | 1.86 | 0.97 | 3.7   |
| Macrocl2 | NA   | NA   | 1.22 | 0.05 | 0.44  |
| Mad111   | 0    | 0    | 0.34 | 0    | 0     |
| Mad211   | 0.08 | 0.63 | 2.01 | 1.2  | 0     |
| Mad211bp | 0.84 | 4.39 | 1.72 | 0    | 4.09  |
| Mad212   | 0.89 | NA   | 1.49 | 2.15 | 2.23  |
| Madcam1  | 2.92 | 4.36 | 0.96 | 1.38 | 1.37  |
| Madd     | 0    | 0    | 2.1  | 0    | 2.25  |
| Maea     | 1.5  | 1.21 | 0.87 | 0.45 | 0     |
| Mael     | NA   | NA   | 0.17 | 3.08 | 0     |
| Maf      | 0    | 1.19 | 3.44 | 0.68 | 0     |
| Maf1     | 0.06 | NA   | 0.89 | 1.01 | 1.88  |
| Mafa     | 3.27 | NA   | NA   | 1.65 | NA    |
| Mafb     | 0.31 | 0.14 | 8.28 | 3.11 | 1.51  |
| Maff     | 0    | 1.56 | 1.24 | 2.75 | 0     |
| Mafg     | 0.72 | 0    | 1.01 | 3.09 | 0     |
| Mafk     | 0    | 1.18 | 1.54 | NA   | 1.93  |
| Mag      | 1.29 | 0.36 | 1.17 | 1.07 | 0     |
| Magea1   | 0    | NA   | NA   | NA   | NA    |
| Magea10  | NA   | NA   | NA   | 0.18 | NA    |
| Magea2   | 0.92 | NA   | NA   | NA   | NA    |
| Magea3   | 3.65 | NA   | NA   | NA   | NA    |
| Magea4   | 2.46 | 2.5  | 2.78 | 1.3  | 1.52  |
| Magea5   | 0.91 | 0.54 | 2.11 | 5.76 | 0     |
| Magea6   | 0.08 | 0    | 0.59 | 0.53 | 1.81  |
| Magea8   | 0.79 | 0    | 1.02 | 0.28 | NA    |
| Magea9   | 0.88 | NA   | NA   | NA   | NA    |
| Mageb1   | 0    | NA   | NA   | NA   | NA    |
| Mageb18  | NA   | NA   | NA   | 1.61 | NA    |
| Mageb2   | 0.04 | NA   | NA   | NA   | NA    |
| Mageb3   | 0.57 | 0    | 0.92 | 0.23 | 3.72  |
| Mageb4   | NA   | NA   | NA   | 0    | NA    |
| Mageb5   | 2.54 | NA   | NA   | NA   | NA    |
| Maged1   | 0.64 | 1.39 | 2.28 | 0    | 0     |
| Maged2   | 1.38 | 0    | 1.33 | 0.23 | 0     |
| Magee1   | 2.43 | NA   | 1.46 | 0.47 | 0     |
| Magee2   | NA   | NA   | NA   | 0.97 | NA    |

|        |      |      |      |      |      |
|--------|------|------|------|------|------|
| Magef1 | NA   | 0    | 4.13 | 2.71 | 9.47 |
| Mageh1 | 0    | 0    | 1.89 | 1.38 | 4.67 |
| Magel2 | 0    | 1.94 | 0.95 | 1.05 | 0    |
| Magi1  | 0.72 | 0.88 | 0.42 | 2.25 | 1.12 |
| Magi2  | NA   | 0.77 | 2.27 | 0.6  | 0    |
| Magi3  | NA   | NA   | 1.95 | 0    | 0.88 |
| Magix  | NA   | 3.21 | 0.11 | 0    | 0    |
| Magmas | 0.36 | NA   | NA   | NA   | NA   |
| Magoh  | 0.28 | 0.01 | 0.42 | 0    | 1.21 |
| Magohb | NA   | 2.46 | 1.36 | 0.61 | 0    |
| Magt1  | NA   | 0    | 1.54 | 0.2  | 0.83 |
| Mak    | 0.3  | 0.61 | 1.72 | 1.76 | 0    |
| Mak10  | 0.35 | NA   | NA   | NA   | NA   |
| Mak16  | NA   | 0.08 | 2.24 | NA   | 0    |
| Mal    | 0.37 | 1.8  | 0.21 | 3.17 | 2.55 |
| Mal2   | 0.23 | NA   | 1.73 | 1.86 | 0    |
| Malat1 | NA   | NA   | 1.97 | 0.98 | 0.63 |
| Mall   | NA   | 0.08 | 1.15 | 1.27 | 0    |
| Malsu1 | NA   | NA   | 1.16 | 1.48 | NA   |
| Malt1  | 1.06 | 0.95 | 3.91 | 0    | 2.68 |
| Mamdc1 | 0.25 | NA   | NA   | NA   | NA   |
| Mamdc2 | 1.3  | NA   | 1.03 | 0    | 0.63 |
| Mamdc4 | NA   | NA   | 5.74 | 1.43 | 0.9  |
| Maml1  | 2.89 | 0    | 1.44 | 1.22 | 0    |
| Maml2  | NA   | NA   | 3.33 | 0.52 | 0    |
| Maml3  | NA   | NA   | NA   | 1.38 | NA   |
| Mamld1 | NA   | 0.41 | 1.42 | 1.32 | 3.3  |
| Mamstr | NA   | NA   | 0    | 1.17 | NA   |
| Man1a2 | NA   | 0.71 | 0.81 | 0.09 | 0    |
| Man1b1 | NA   | 0    | 1.02 | 1.02 | 0    |
| Man1c1 | 0.41 | 2.57 | 1.99 | 0.99 | 0    |
| Man2a1 | 0.46 | 2.56 | 1.96 | 0.96 | 6.71 |
| Man2a2 | 0    | 1.29 | 0.79 | 0.98 | 1.18 |
| Man2b1 | 1.16 | 0    | 1.01 | 1.41 | 2.62 |
| Man2b2 | 0.21 | 0    | 2.01 | 0.19 | 1.44 |
| Man2c1 | 6.22 | 0    | 0.58 | 0.71 | 1.37 |
| Manba  | 0.05 | 0.66 | 2.63 | 0.05 | 0    |
| Manbal | 0.76 | NA   | 1.4  | 0.22 | 0    |
| Manea  | 0.59 | 1.37 | 1.38 | 0.88 | 0    |
| Maneal | NA   | NA   | 0.49 | 1.35 | NA   |
| Manf   | NA   | 0.19 | 1.48 | 1.01 | 1.28 |

|           |      |      |      |       |      |
|-----------|------|------|------|-------|------|
| Mansc1    | 5.64 | 4.11 | 2.71 | 3.04  | 3.33 |
| Maoa      | 0.58 | 0    | 0    | 0.61  | 3.08 |
| Maob      | 1.32 | 2.33 | 1.68 | 1.89  | 1.49 |
| Map10     | NA   | NA   | 0.62 | 0.61  | NA   |
| Map1a     | NA   | 1.26 | 2.21 | 0     | NA   |
| Map1b     | NA   | 0.46 | 0.68 | 3.79  | NA   |
| Map1lc3a  | 0.48 | NA   | 2.05 | 0.91  | 0    |
| Map1lc3b  | 0.64 | 1.28 | 0.38 | 1.71  | 0    |
| Map1s     | NA   | 1.29 | 0    | 1.25  | NA   |
| Map2      | NA   | 1    | 2.01 | 1.81  | NA   |
| Map2k1    | 2.88 | 1.39 | 2.52 | NA    | 0.59 |
| Map2k1ip1 | 0.16 | NA   | NA   | NA    | NA   |
| Map2k2    | 0    | 0.9  | 1.34 | 0.7   | 0.11 |
| Map2k3    | 0.53 | 0.63 | 1.22 | 0     | 0.08 |
| Map2k4    | 0.74 | 1.58 | 2.11 | 0.14  | 2.03 |
| Map2k5    | 0    | 0    | 0.92 | 0     | 0.75 |
| Map2k6    | 0.63 | 3.37 | 4.78 | 0.77  | 0    |
| Map2k7    | 0.33 | 0.64 | 0.47 | NA    | 0.88 |
| Map3k1    | 0    | 1.7  | 2.43 | 1.12  | 0    |
| Map3k10   | 0.54 | 0.83 | 0.93 | 2.33  | 0    |
| Map3k11   | 2.48 | 1.47 | 1.5  | 1.58  | 0    |
| Map3k12   | 0    | 1.23 | 0.37 | 2.13  | 0    |
| Map3k13   | 0.97 | NA   | NA   | 1.59  | NA   |
| Map3k14   | 0    | 0    | 1.69 | NA    | 2.77 |
| Map3k15   | NA   | NA   | NA   | 0.9   | NA   |
| Map3k19   | NA   | NA   | NA   | 2.24  | NA   |
| Map3k2    | 0    | 0.32 | 0.52 | 0.55  | 0.04 |
| Map3k3    | 0    | 0.53 | 1.69 | NA    | 3.39 |
| Map3k4    | 0    | 0    | 0.93 | 0.31  | 0    |
| Map3k5    | 1.36 | 0.39 | 1.25 | 0.52  | 0    |
| Map3k6    | 1.05 | 1.2  | 2.31 | 1.16  | 0.65 |
| Map3k7    | 0.69 | 0.77 | 1.03 | 0.42  | 0.93 |
| Map3k7cl  | NA   | 3.76 | 9.28 | 4.79  | NA   |
| Map3k7ip1 | 0.05 | NA   | NA   | NA    | NA   |
| Map3k7ip2 | 0    | NA   | NA   | NA    | NA   |
| Map3k8    | 0    | 1.58 | 0.71 | 1.88  | 0    |
| Map3k9    | 2.2  | 1.1  | 1.2  | 1.94  | 0    |
| Map4      | NA   | 0.43 | 0.06 | 0     | NA   |
| Map4k1    | 0.27 | 0    | 0.1  | 1.5   | 0    |
| Map4k2    | 0.52 | 0.1  | 1.35 | 1.68  | 0.63 |
| Map4k3    | 1.42 | 0.71 | 0.82 | 10.88 | 0    |

|           |      |      |      |      |      |
|-----------|------|------|------|------|------|
| Map4k4    | 1.33 | 0.71 | 0    | 0.74 | 0    |
| Map4k5    | 0.42 | 1.03 | 2.12 | 2.32 | 0    |
| Map6      | NA   | NA   | 0.06 | 1.62 | NA   |
| Map6d1    | NA   | 0    | 0.94 | 1.17 | 0.8  |
| Map7      | NA   | 0    | 1.88 | 1.71 | NA   |
| Map7d1    | NA   | 3.23 | 0.33 | 0.54 | NA   |
| Map7d2    | NA   | NA   | 0.08 | 3.04 | NA   |
| Map9      | NA   | 0.71 | 0    | 0.66 | NA   |
| Mapbpip   | 0.09 | NA   | NA   | NA   | NA   |
| Mapk1     | 0.06 | 1.98 | 0.65 | 0.07 | 0.55 |
| Mapk10    | 0    | 0.99 | 1.05 | 0.36 | 1.83 |
| Mapk11    | 0.92 | 1.58 | 2.31 | 2.22 | 0    |
| Mapk12    | 1.17 | NA   | 0.79 | 0.97 | 1.47 |
| Mapk13    | 0    | 0.29 | 1.48 | 2.46 | 0    |
| Mapk14    | 0.26 | 1.5  | 1.53 | 0.47 | 0    |
| Mapk15    | NA   | NA   | 2.72 | 3.64 | 4.5  |
| Mapk1ip11 | NA   | 0.55 | 0.49 | 2.69 | 0    |
| Mapk3     | 0    | 0.84 | 0.99 | 1.42 | 0    |
| Mapk4     | 2.19 | 1.01 | 1.38 | 2.58 | 0    |
| Mapk6     | 1.13 | 1.16 | 1.18 | 5.2  | 1.68 |
| Mapk7     | 0    | 1.34 | 1.34 | 0.9  | 0    |
| Mapk8     | 0.47 | 0.37 | 0.94 | 0    | 0.08 |
| Mapk8ip1  | NA   | 1.42 | 1.13 | 1.25 | 1.98 |
| Mapk8ip2  | 1.09 | 0    | 0.4  | 1.14 | 1.72 |
| Mapk8ip3  | 0.21 | 1.78 | 1.04 | 0.23 | 0.49 |
| Mapk9     | 0    | 0    | 1.24 | 0.01 | 1.87 |
| Mapkap1   | 0    | 0    | 0.9  | 0.78 | 1.79 |
| Mapkapk2  | 0.52 | 1.85 | 0.9  | 0.92 | 0    |
| Mapkapk3  | 0.77 | 0.8  | 3.68 | 1.85 | 1.9  |
| Mapkapk5  | 3.46 | 2.82 | 0.17 | 1.2  | 3.81 |
| Mapkbp1   | 1.39 | 1.14 | 1.19 | 0.43 | 1.69 |
| Mapksp1   | NA   | NA   | NA   | NA   | 0.72 |
| Mapre1    | 0    | 0.82 | 1.27 | 0.66 | 0    |
| Mapre2    | 0    | 0    | 1.2  | 0.96 | 0    |
| Mapre3    | 0.48 | 1.3  | 1.5  | 0.97 | 0    |
| Mapt      | 0.14 | 0.8  | 0.88 | 7.18 | 0    |
| 41699     | NA   | 2.51 | 1.38 | 2.15 | NA   |
| 41700     | NA   | 2.82 | 2.09 | 2.21 | NA   |
| 41699     | NA   | 0.34 | 2.38 | 0.2  | 1.65 |
| 41708     | NA   | NA   | 0.44 | 0.78 | 0    |
| 41709     | NA   | NA   | 1.35 | 0.54 | 0    |

|          |       |      |      |      |       |
|----------|-------|------|------|------|-------|
| 41700    | NA    | 0.74 | 1.55 | 1.19 | 0     |
| 41701    | NA    | 0.86 | 0    | 0    | 2.7   |
| 41702    | NA    | NA   | 0.58 | 1.23 | 0.81  |
| 41703    | NA    | 1.75 | 1.78 | 0.72 | 1.44  |
| 41704    | NA    | 0.59 | 1.97 | 0    | 1.22  |
| 41705    | NA    | 0.86 | 2.24 | 0.02 | 0.13  |
| 41706    | NA    | 0.09 | 1.72 | 0    | 0.28  |
| 41707    | NA    | NA   | 1.76 | 2.24 | 1.87  |
| Marcks   | 0.45  | 1.35 | 1.69 | 0    | 0     |
| Marcksl1 | NA    | 2.79 | 0.89 | 1.98 | 11.49 |
| Marco    | 0.32  | 0    | 0    | 0.51 | 0     |
| Mark1    | 0.52  | 0    | 0.42 | 1.37 | 0.18  |
| Mark2    | 1.7   | 0.49 | 0.75 | 1.45 | 0     |
| Mark3    | 0     | 3.87 | 1.76 | 0.64 | NA    |
| Mark4    | 0     | 0.74 | 0.43 | 1.53 | 0.22  |
| Mars     | NA    | 1.57 | 0.93 | 0    | 0     |
| Mars2    | NA    | NA   | 1.87 | 1.13 | 0.12  |
| Marveld1 | 0     | NA   | 0.85 | 1.88 | 0.78  |
| Marveld2 | 0.49  | NA   | 1.93 | 0.34 | 2.68  |
| Marveld3 | 0.61  | NA   | 0.66 | 0.24 | 0     |
| Mas1     | 0.79  | 0.02 | 0.05 | 1.54 | 4.47  |
| Masp1    | 0.41  | 0.79 | 0.36 | 1.62 | 0     |
| Masp2    | 0     | 1.45 | 1    | NA   | 1.14  |
| Mast1    | 14.82 | 1.48 | 0.28 | 0.19 | 0     |
| Mast2    | 0.56  | 1    | 0.59 | 1.52 | 0     |
| Mast3    | 0.31  | 0.62 | 1.68 | 0.94 | 0.26  |
| Mast4    | NA    | 0.77 | 0.67 | 3.6  | 0.69  |
| Mastl    | 0.65  | NA   | 2.76 | 1.73 | 0     |
| Mat1a    | 0     | 2.27 | 1.74 | 0.13 | 1.15  |
| Mat2a    | 0.52  | 1.36 | 1.04 | 0.17 | 0     |
| Mat2b    | 0.35  | 0.46 | 0    | 4.11 | 1.76  |
| Matk     | 0.08  | 0    | 9.7  | 0.06 | 3.19  |
| Matn1    | 0     | 0.65 | 4.75 | NA   | 0     |
| Matn2    | 0.67  | 1.15 | 1.21 | 3.75 | 0     |
| Matn3    | 0     | 1.65 | 0.61 | 0.76 | 1.82  |
| Matn4    | 1.03  | 0    | 2.14 | 2.78 | 0     |
| Matr3    | 0.14  | 0.51 | 1.87 | NA   | 0     |
| Mau2     | NA    | 0.71 | 0.61 | 0    | NA    |
| Mavs     | NA    | 0.16 | 0.74 | 2.42 | 0     |
| Max      | 0.69  | 0    | 0.09 | 1.04 | NA    |
| Maz      | 0.56  | 0    | 3.9  | 1.96 | 0     |



|        |      |      |      |      |      |
|--------|------|------|------|------|------|
| Mb     | 0    | 0.63 | 0    | 3.08 | 3.12 |
| Mb21d1 | NA   | NA   | 3.58 | 0.62 | NA   |
| Mb21d2 | NA   | NA   | 3.44 | 7.42 | NA   |
| Mbd1   | 0.39 | 1.23 | 1.49 | 4.11 | 0    |
| Mbd2   | 0.52 | 0.57 | 0.1  | 1.9  | 0    |
| Mbd3   | 0.02 | 0.69 | 1.19 | 2.42 | 1.36 |
| Mbd311 | 0.73 | NA   | 1.57 | 2.99 | NA   |
| Mbd312 | NA   | NA   | 0.63 | NA   | NA   |
| Mbd4   | 0.35 | 2.05 | 0    | NA   | 2.43 |
| Mbd5   | 0    | 0    | 0.98 | 1.24 | 0    |
| Mbd6   | NA   | NA   | 1.94 | 1.14 | 1.02 |
| Mbip   | 0    | 0.98 | 0    | 1.12 | 2.75 |
| Mbl2   | 1.46 | 2.41 | 0.89 | 4.49 | 2.3  |
| Mblac1 | NA   | NA   | 1.75 | 1.56 | NA   |
| Mblac2 | NA   | NA   | 0.17 | 0    | 0    |
| Mbnl1  | 2.17 | 0.54 | 2.09 | 0.98 | 0    |
| Mbnl2  | 0.68 | 0.18 | 0.37 | 3.01 | 0    |
| Mbnl3  | 0.01 | 0    | 0.97 | 0.27 | 1.39 |
| Mboat1 | NA   | NA   | 1.99 | 1.15 | 1.04 |
| Mboat2 | NA   | 3.21 | 2.51 | 1.44 | 2.17 |
| Mboat4 | NA   | NA   | NA   | 1.04 | NA   |
| Mboat7 | NA   | 1.26 | 0.35 | 3.19 | 0    |
| Mbp    | 0    | 0.96 | 0.66 | 1.14 | 0.61 |
| Mbtd1  | 0.56 | 1.67 | 0.53 | 0.3  | 0    |
| Mbtps1 | 0.06 | 0    | 0    | 3.41 | 0    |
| Mbtps2 | 0    | 0    | 1.3  | NA   | 1.83 |
| Mc1r   | 0    | 0.01 | 1.28 | 0.34 | 0    |
| Mc2r   | 2.52 | 1.14 | 0.23 | 0    | 4.37 |
| Mc3r   | 0    | 1.26 | 0.52 | 2.13 | 4.45 |
| Mc4r   | 0.87 | NA   | NA   | 0.2  | NA   |
| Mc5r   | 0.62 | 2.06 | 0.01 | 1.43 | 0    |
| Mcama  | 2.24 | 0.42 | 0.87 | 0.98 | 1.52 |
| Mcart1 | 0.1  | NA   | NA   | NA   | 0    |
| Mcat   | NA   | 1.82 | 0.85 | 0    | 1.21 |
| Mcc    | 0.48 | 0.73 | 0.1  | 0.57 | 1.01 |
| Mccc1  | 0    | 0    | 0.36 | 0.86 | 6.11 |
| Mccc2  | 0.36 | 0    | 1.26 | 0.48 | 1.56 |
| Mcee   | 0.17 | NA   | 0.44 | 5.29 | 3.25 |
| Mcf2   | 1.78 | 0    | 0.21 | 2.72 | 1.8  |
| Mcf21  | 1.63 | 0    | 1.37 | 2.17 | 0    |
| Mcfd2  | 0    | 0.98 | 1.8  | 0.54 | 0    |

|        |      |      |      |      |      |
|--------|------|------|------|------|------|
| Mchr1  | NA   | 1.38 | 0.41 | 5.25 | 1.83 |
| Mcl1   | 1.08 | 1.59 | 0.33 | 0.5  | 0    |
| Mcm10  | 0    | 2.26 | 0.64 | 1.42 | 0    |
| Mcm2   | 0.49 | 0    | 2.51 | 0.27 | 0    |
| Mcm3   | 0.26 | 0    | 1.67 | 0    | 0    |
| Mcm3ap | 1.52 | 0.83 | 2.47 | 0    | 0.07 |
| Mcm4   | 0    | 0.38 | 3.12 | 0    | 0    |
| Mcm5   | 0.24 | 0.77 | 2.28 | 0    | 1.75 |
| Mcm6   | 0.05 | 0    | 1.29 | 2.67 | 0.72 |
| Mcm7   | 0.68 | 0    | 2.03 | 0.06 | 3.32 |
| Mcm8   | 3.1  | NA   | 0.8  | 0.62 | 0    |
| Mcm9   | NA   | 1.44 | 0.38 | 0    | 0    |
| Mcmcbp | NA   | 2.13 | 0.9  | 0    | NA   |
| Mcmde1 | 3.17 | NA   | NA   | NA   | NA   |
| Mcmde2 | NA   | NA   | NA   | 3.34 | NA   |
| Mcoln1 | 1.94 | 0.39 | 0.27 | 1.85 | 1.76 |
| Mcoln2 | 0.01 | NA   | 1.71 | 4.74 | 2.45 |
| Mcoln3 | 0.96 | 2.93 | 1.55 | 1.9  | 0    |
| Mcph1  | 0.99 | 0.48 | 2.2  | 0.2  | 0    |
| Mers1  | 0    | 2.02 | 1.13 | 0.74 | 2.75 |
| Mctp1  | NA   | 2.56 | 0.27 | 0    | 0    |
| Mctp2  | NA   | 0    | 0.76 | 1.63 | 0    |
| Mcts1  | 0.7  | 0    | 1.21 | 0    | 0    |
| Mcu    | NA   | NA   | 0.4  | 1.79 | NA   |
| Mcur1  | NA   | 3.09 | 0.35 | 0.52 | NA   |
| Mdc1   | NA   | 0    | 2.54 | 0.41 | 0.77 |
| Mdfi   | 0    | 2.05 | 1.22 | 0.67 | 0    |
| Mdfic  | NA   | 2.94 | 1.55 | 1.72 | 0    |
| Mdga1  | 0.37 | NA   | 0.01 | 1.98 | 0    |
| Mdga2  | NA   | NA   | 1.73 | 0    | 0.31 |
| Mdh1   | 0.21 | 1.71 | 0.04 | 3.82 | 0    |
| Mdh1b  | 0.61 | NA   | 0.24 | 1.26 | 2.56 |
| Mdh2   | 0    | 2.4  | 0.72 | 0.41 | 2.22 |
| Mdk    | 1.21 | 3.49 | 6.36 | 0    | 0    |
| Mdm1   | 0.52 | 0.63 | 0.04 | 0.49 | 0    |
| Mdm2   | 0.06 | 0.88 | 0.94 | 0.24 | 0.1  |
| Mdm4   | 1.2  | 0.77 | 0.74 | 0    | 0.8  |
| Mdn1   | 1.38 | 2.19 | 0.5  | 7.53 | 3.93 |
| Mdp1   | NA   | NA   | 0.62 | 0    | 0    |
| Mds1   | 4.06 | NA   | NA   | NA   | NA   |
| Me1    | NA   | 1.03 | 3.89 | 1.03 | NA   |

|        |      |      |      |      |      |
|--------|------|------|------|------|------|
| Me2    | 0.34 | 1.83 | 1.6  | 0.52 | 0.18 |
| Me3    | NA   | 0    | 2.45 | 0.97 | 3.21 |
| Mea1   | 0    | 0.78 | 1.31 | NA   | 3.01 |
| Meaf6  | NA   | 0    | 1.86 | 0.73 | 0    |
| Mecom  | NA   | 0.27 | 0.52 | 0.43 | 1.46 |
| Mecp2  | 0    | 0    | 1.59 | 1.69 | 0.76 |
| Mecr   | NA   | 1.05 | 0.68 | 0    | 0    |
| Med1   | NA   | 0.01 | 0    | 1.45 | 1.05 |
| Med10  | NA   | NA   | 0.12 | 1.22 | NA   |
| Med11  | NA   | NA   | 2.74 | 1.15 | 1.37 |
| Med12  | NA   | 1.84 | 1.98 | 2.38 | 0    |
| Med121 | NA   | NA   | 0.3  | 0    | 0.32 |
| Med13  | NA   | 1.22 | 0.59 | 0.48 | 0    |
| Med131 | NA   | 0.58 | 1.41 | 1.86 | 1.53 |
| Med14  | NA   | 0.37 | 0.17 | 1.03 | 0    |
| Med15  | NA   | 1.31 | 0.31 | 0    | 3.55 |
| Med16  | NA   | 1.37 | 1.14 | 0    | 3.95 |
| Med17  | NA   | 0.24 | 0.49 | 0.44 | 1.54 |
| Med18  | NA   | 2.53 | 1.9  | 1.1  | 0    |
| Med19  | NA   | NA   | 1.16 | 0.16 | 0.81 |
| Med20  | NA   | 1.02 | 1.87 | 0.72 | 0    |
| Med21  | NA   | 0    | 2.2  | 0.1  | 4.36 |
| Med22  | NA   | 1.03 | 2.48 | 2.26 | 0    |
| Med23  | NA   | 0.98 | 1.53 | 1.18 | 0    |
| Med24  | NA   | 0    | 0.03 | 1.45 | 0    |
| Med25  | NA   | 0    | 0.65 | 1.59 | 0    |
| Med26  | NA   | NA   | 0.78 | 0.66 | 1.55 |
| Med27  | NA   | 1.18 | 1.62 | 0.77 | 1.26 |
| Med28  | NA   | 2.28 | 2.34 | 3.05 | 0    |
| Med29  | NA   | NA   | 1.16 | 0.66 | 3.62 |
| Med30  | NA   | NA   | 0.64 | 1.32 | 0.16 |
| Med31  | NA   | 3.32 | 2.02 | NA   | 1.62 |
| Med4   | NA   | 0.78 | 0.14 | 0.88 | 3.75 |
| Med6   | 0.36 | 0.41 | 1.27 | 0.5  | 0    |
| Med7   | NA   | 0.14 | 2.87 | 0.88 | 4.19 |
| Med8   | NA   | 0.06 | 0.01 | 2.25 | 0.57 |
| Med9   | NA   | 2.09 | 2.94 | 4.43 | 1.09 |
| Medag  | NA   | NA   | 1.51 | 1.69 | NA   |
| Mef2a  | 1.05 | 0    | 3.81 | 1.06 | 0    |
| Mef2b  | 1.49 | 3.89 | 4.09 | NA   | NA   |
| Mef2c  | 0    | 0.16 | 1.77 | 1.19 | 0    |

|          |      |      |      |      |      |
|----------|------|------|------|------|------|
| Mef2d    | 0    | 1.81 | 0.86 | 1.9  | 0.82 |
| Mefv     | 0.56 | 4.63 | 2.07 | 0.55 | 0    |
| Meg3     | NA   | 0.57 | 0.62 | 2.77 | 0    |
| Megf10   | NA   | NA   | 0.58 | 0.09 | 0.8  |
| Megf11   | NA   | NA   | 0.48 | 0.38 | NA   |
| Megf6    | NA   | 0    | 0.36 | 0.71 | 0    |
| Megf8    | NA   | 0.81 | 1.85 | 0.79 | 2.2  |
| Megf9    | NA   | 0.49 | 0.82 | 1.41 | 0.22 |
| Mei1     | 0.51 | NA   | 1.72 | 1.95 | 0    |
| Meig1    | 0.42 | NA   | 2.84 | 0    | 0    |
| Meiob    | NA   | NA   | 0.71 | 2.02 | NA   |
| Meis1    | 0.93 | 0    | 0.93 | 0    | 0    |
| Meis2    | NA   | 0.86 | 6.13 | 1.19 | 1.24 |
| Meis3    | NA   | NA   | 0.64 | 0.79 | 0.18 |
| Melk     | 1.28 | 0.47 | 1.73 | 0.84 | 1.91 |
| Memo1    | NA   | NA   | NA   | 0    | NA   |
| Men1     | 1.85 | 0    | 0.23 | 4.47 | 3.55 |
| Meox1    | 0.94 | 4.14 | 0.36 | 1.03 | 0.24 |
| Meox2    | 1.23 | 0.09 | 0    | 2.39 | 0.01 |
| Mep1a    | 0    | 1.04 | 1.5  | 0.41 | 0    |
| Mep1b    | 1.35 | 2.16 | 1.79 | 0.08 | 5.1  |
| Mepce    | NA   | 0    | 0.78 | 1.41 | 0    |
| Mepe     | 2.03 | 0.38 | 2.28 | 0    | 1.33 |
| Mertk    | 0    | 0.24 | 3.3  | 0    | 0    |
| Mesdc1   | 1.29 | NA   | 2.14 | 1.66 | 0.48 |
| Mesdc2   | 2.64 | NA   | 1.19 | 1.06 | 0.12 |
| Mesp1    | 3.51 | NA   | 2.14 | 1.26 | 0    |
| Mesp2    | 0.18 | NA   | 2.08 | 0.09 | NA   |
| Mest     | 0.36 | 0    | 0.38 | 1.86 | 0    |
| Met      | 0.08 | 0.53 | 2.27 | 1.75 | 2.56 |
| Metap1   | 0    | 0    | 0.72 | 0.76 | 3.44 |
| Metap1d  | NA   | NA   | 0.25 | 4.01 | NA   |
| Metap2   | 0    | 0.76 | 0.6  | 0.6  | 0    |
| Metrn    | 0.98 | 1.25 | 1.56 | 0.65 | 0.93 |
| Metrn1   | NA   | NA   | 0.9  | 1.21 | 1.23 |
| Mett10d  | NA   | NA   | NA   | NA   | 3.57 |
| Mett5d1  | NA   | NA   | NA   | NA   | 0.31 |
| Mettl1   | 0.83 | 1.98 | 0.09 | 2.85 | 0    |
| Mettl10  | NA   | 1.14 | 0.52 | 0.45 | 3.17 |
| Mettl11a | NA   | NA   | NA   | NA   | 4.75 |
| Mettl13  | NA   | 0    | 0.85 | 3.74 | 0    |

|          |      |      |      |      |      |
|----------|------|------|------|------|------|
| Mettl14  | NA   | NA   | 0.76 | 0.81 | 0    |
| Mettl15  | NA   | NA   | 0.87 | 0.49 | NA   |
| Mettl16  | NA   | 0    | 0    | 0.85 | NA   |
| Mettl17  | NA   | 0    | 0.12 | 1.57 | NA   |
| Mettl18  | NA   | 2.39 | 0    | 0.93 | NA   |
| Mettl20  | NA   | NA   | 1.05 | 1.77 | NA   |
| Mettl21a | NA   | NA   | 1.49 | 1.13 | NA   |
| Mettl21c | NA   | NA   | NA   | 0.75 | NA   |
| Mettl21d | NA   | 1.29 | 1.64 | 0.51 | NA   |
| Mettl22  | NA   | 1.66 | 0.28 | 1.21 | NA   |
| Mettl23  | NA   | NA   | 1.09 | 1.21 | NA   |
| Mettl24  | NA   | NA   | NA   | 1.31 | NA   |
| Mettl25  | NA   | NA   | 2.79 | 0.72 | NA   |
| Mettl3   | 0.23 | 0    | 2.86 | NA   | 0    |
| Mettl4   | 0.73 | 0.1  | 2.65 | 1.25 | 0    |
| Mettl5   | NA   | 0.4  | 2.14 | 0.55 | 0    |
| Mettl6   | NA   | NA   | 0.51 | 1.81 | 2.58 |
| Mettl7b  | NA   | NA   | 1.2  | 2.26 | 2.07 |
| Mettl8   | NA   | 0    | 1.03 | 2.37 | 0.9  |
| Mettl9   | NA   | 0    | 2.99 | 0.61 | 0    |
| Mex3a    | NA   | NA   | 0.4  | NA   | 0    |
| Mex3b    | NA   | NA   | 4.38 | 1.88 | 4.63 |
| Mex3c    | NA   | 0    | 1.39 | 1.6  | 0.89 |
| Mex3d    | NA   | 1.38 | 2.53 | 1.95 | 1.92 |
| Mfap1    | 0.37 | NA   | NA   | NA   | NA   |
| Mfap2    | 0.96 | 1.35 | 0.57 | 1.9  | 2.7  |
| Mfap3    | 0.72 | 1.41 | 1.54 | 0.72 | 2.28 |
| Mfap3l   | NA   | 0.67 | 2.29 | 1.05 | 0    |
| Mfap4    | 4.08 | 2.19 | 1.53 | 1.22 | 4.95 |
| Mfap5    | 5.67 | 0.48 | 0.81 | 1.54 | 1.69 |
| Mff      | NA   | 1.55 | 2.23 | 0.97 | 0    |
| Mfge8    | 1.02 | 0.27 | 3.1  | 0.35 | 4.87 |
| Mfhas1   | 0.61 | 0    | 0    | 1.54 | 6.61 |
| Mfi2     | 0.09 | 1.14 | 1.73 | 0.91 | 1.3  |
| Mfn1     | 0.55 | 1.07 | 1.01 | 0.76 | 1.47 |
| Mfn2     | 0.62 | 0.77 | 0.05 | 0    | 0.09 |
| Mfng     | 0    | 0    | 4.19 | 0.52 | NA   |
| Mfrp     | 2.06 | NA   | NA   | NA   | NA   |
| Mfsd1    | NA   | 1.16 | 3.64 | 0.64 | 3.08 |
| Mfsd10   | NA   | 0.75 | 2.72 | 3.07 | 3.46 |
| Mfsd11   | NA   | 1.83 | 3.6  | 2.01 | 0    |

|         |      |      |      |      |      |
|---------|------|------|------|------|------|
| Mfsd12  | NA   | 2.87 | 1.53 | 2.23 | NA   |
| Mfsd2a  | NA   | NA   | 1.08 | 1.86 | NA   |
| Mfsd2b  | NA   | 2.01 | 2.73 | 1.12 | NA   |
| Mfsd3   | NA   | NA   | 1.18 | NA   | 1.58 |
| Mfsd4   | NA   | NA   | 0    | 0.33 | 0.88 |
| Mfsd5   | NA   | 1.86 | 1    | 2.33 | 0    |
| Mfsd6   | NA   | 2.3  | 2.33 | 0    | 3.64 |
| Mfsd6l  | NA   | NA   | 0    | 2.02 | NA   |
| Mfsd8   | NA   | NA   | 1.88 | 0.03 | 0    |
| Mfsd9   | NA   | 1.37 | 0.1  | 1.28 | 0.13 |
| Mga     | 0    | 0    | 1.22 | 2.45 | 0    |
| Mgam    | 0    | 0.23 | 6.26 | 0    | 0    |
| Mgarp   | NA   | NA   | 0.89 | 2.89 | NA   |
| Mgat1   | 0.37 | 3.31 | 0.69 | 2.47 | 0    |
| Mgat2   | 0.47 | 1.02 | 2.37 | 1.1  | 0    |
| Mgat3   | 0.92 | 1.4  | 1.38 | 1.9  | 3.26 |
| Mgat4a  | 0.55 | 0.62 | 1.22 | 1.36 | 2.81 |
| Mgat4b  | 0.44 | 2.19 | 2.33 | 0.97 | 2.56 |
| Mgat4c  | NA   | 0.98 | 0.38 | 1.75 | 1.28 |
| Mgat5   | 0    | 1.29 | 1.09 | 4.69 | 0    |
| Mgat5b  | NA   | NA   | 0.53 | 1.85 | 9.13 |
| Mgea5   | 0.13 | 0.99 | 1.08 | 1.52 | 0.25 |
| Mgll    | 1.37 | 1.03 | 0.04 | 0    | 0.49 |
| Mgme1   | NA   | NA   | 0.43 | 0.11 | NA   |
| Mgmt    | 0    | 0    | 3.56 | 1.2  | 0    |
| Mgp     | NA   | 1.57 | 0.5  | 5.53 | 0.07 |
| Mgrn1   | 0.29 | 0.24 | 0.27 | 1.55 | 0.18 |
| Mgst1   | 0.48 | NA   | 0.93 | 1.69 | 0.65 |
| Mgst2   | 0.4  | 2.38 | 1.98 | 2.27 | 4.04 |
| Mgst3   | 0.35 | 2.13 | 2.13 | 0.76 | 0.74 |
| Mia     | NA   | 0.77 | 0.91 | 0.8  | NA   |
| Mia2    | 3.21 | 1.36 | 0    | 0.7  | 0.02 |
| Mia3    | 0.61 | 0.66 | 0.88 | 0.12 | 0.09 |
| Miat    | NA   | NA   | 1.69 | NA   | NA   |
| Mib1    | 0    | NA   | 1.04 | 0    | 0    |
| Mib2    | NA   | NA   | 1.88 | 0.38 | 0    |
| Mical1  | NA   | 2.81 | 2    | 0.06 | 1.29 |
| Mical2  | NA   | 2.09 | 2.46 | 1.92 | 1.7  |
| Mical3  | 1.14 | 0    | 1.03 | 0    | 0    |
| Micalcl | NA   | NA   | NA   | 2.05 | 0.32 |
| Micall1 | NA   | 0    | 2.49 | 0.99 | 0    |

|          |      |      |      |       |      |
|----------|------|------|------|-------|------|
| Micall2  | NA   | 0.79 | 0    | 0.77  | 0    |
| Micu1    | NA   | 1.55 | 1.12 | 1.24  | NA   |
| Micu2    | NA   | 1.99 | 2.05 | 5.18  | NA   |
| Micu3    | NA   | NA   | 2.53 | 0.52  | NA   |
| Mid1     | 0.94 | 0.23 | 0.94 | 1.88  | 0    |
| Mid1ip1  | 0.13 | 0    | 0.36 | 0     | 0    |
| Mid2     | 0.05 | 1.35 | 0.59 | 0.56  | 2.27 |
| Midn     | 0.06 | NA   | 1.68 | 1.58  | 0    |
| Mien1    | NA   | NA   | 1.26 | 0.69  | NA   |
| Mier1    | NA   | NA   | 0.89 | 0.71  | 0    |
| Mier2    | NA   | 0.1  | 3.82 | 2.35  | 1.76 |
| Mier3    | NA   | NA   | 4.37 | 0.95  | 3.94 |
| Mif      | 2.08 | 1.42 | 0.02 | 15.69 | 2.63 |
| Mif4gd   | NA   | NA   | 1.49 | 2.68  | 8.47 |
| Miip     | NA   | 2.36 | 1.38 | 1.87  | 1.7  |
| Milr1    | NA   | 0    | 3.04 | 0.59  | NA   |
| Mina     | 0    | 0    | 0.3  | NA    | 0    |
| Mink1    | NA   | 1.17 | 0.43 | 0.85  | 0.89 |
| Minos1   | NA   | NA   | 0.56 | 0.13  | NA   |
| Minpp1   | 0.24 | 0.85 | 0.13 | 0     | 0    |
| Mios     | NA   | 0.91 | 1.81 | 0.75  | 0.77 |
| Miox     | NA   | NA   | 1.75 | 1.93  | 0    |
| Mip      | 0.76 | 1.57 | 0.98 | 0.82  | 0    |
| Mipep    | 0    | 0    | 2.16 | 0     | 1.85 |
| Mipol1   | 0.05 | NA   | 0.76 | NA    | 0.57 |
| Mir100   | NA   | NA   | NA   | 2.35  | NA   |
| Mir106a  | NA   | NA   | NA   | 0.95  | NA   |
| Mir106b  | NA   | NA   | NA   | 2.03  | NA   |
| Mir107   | NA   | NA   | NA   | 1.17  | NA   |
| Mir10a   | NA   | NA   | NA   | 0     | NA   |
| Mir10b   | NA   | NA   | NA   | 0.6   | NA   |
| Mir125a  | NA   | NA   | NA   | 0.49  | NA   |
| Mir126   | NA   | NA   | NA   | 0     | NA   |
| Mir127   | NA   | NA   | NA   | 0.87  | NA   |
| Mir128-1 | NA   | NA   | NA   | 0.5   | NA   |
| Mir128-2 | NA   | NA   | NA   | 0.81  | NA   |
| Mir129-1 | NA   | NA   | NA   | 0     | NA   |
| Mir129-2 | NA   | NA   | NA   | 1.18  | NA   |
| Mir130a  | NA   | NA   | NA   | 0     | NA   |
| Mir130b  | NA   | NA   | NA   | 1.41  | NA   |
| Mir132   | NA   | NA   | NA   | 0.64  | NA   |

|          |      |    |      |      |    |
|----------|------|----|------|------|----|
| Mir133b  | NA   | NA | NA   | 2.46 | NA |
| Mir134   | NA   | NA | NA   | 2.85 | NA |
| Mir136   | NA   | NA | NA   | 3.5  | NA |
| Mir137   | NA   | NA | NA   | 0.37 | NA |
| Mir138-1 | NA   | NA | NA   | 0.78 | NA |
| Mir138-2 | NA   | NA | NA   | 0.79 | NA |
| Mir139   | NA   | NA | NA   | 1.09 | NA |
| Mir140   | NA   | NA | NA   | 0.67 | NA |
| Mir141   | NA   | NA | NA   | 3.27 | NA |
| Mir142   | NA   | NA | NA   | 0    | NA |
| Mir144   | NA   | NA | NA   | 0.82 | NA |
| Mir148a  | NA   | NA | NA   | 5.34 | NA |
| Mir148b  | NA   | NA | NA   | 0    | NA |
| Mir149   | NA   | NA | NA   | 1.01 | NA |
| Mir150   | NA   | NA | NA   | 0    | NA |
| Mir152   | NA   | NA | NA   | 0.5  | NA |
| Mir154   | NA   | NA | NA   | 5    | NA |
| Mir155   | NA   | NA | NA   | 0    | NA |
| Mir15a   | NA   | NA | NA   | 0    | NA |
| Mir15b   | NA   | NA | NA   | 3.02 | NA |
| Mir16    | 0.01 | NA | NA   | NA   | NA |
| Mir16-1  | NA   | NA | NA   | 2.3  | NA |
| Mir16-2  | NA   | NA | NA   | 1.01 | NA |
| Mir17hg  | NA   | NA | 2.13 | 0.62 | NA |
| Mir181c  | NA   | NA | NA   | 1.56 | NA |
| Mir182   | NA   | NA | NA   | 3.04 | NA |
| Mir183   | NA   | NA | NA   | 0.7  | NA |
| Mir184   | NA   | NA | NA   | 1.34 | NA |
| Mir185   | NA   | NA | NA   | 2    | NA |
| Mir186   | NA   | NA | NA   | 4.24 | NA |
| Mir187   | NA   | NA | NA   | 1.27 | NA |
| Mir188   | NA   | NA | NA   | 0    | NA |
| Mir191   | NA   | NA | NA   | 3.47 | NA |
| Mir192   | NA   | NA | NA   | 0    | NA |
| Mir194-1 | NA   | NA | NA   | 0    | NA |
| Mir194-2 | NA   | NA | NA   | 1.28 | NA |
| Mir195   | NA   | NA | NA   | 1.38 | NA |
| Mir199b  | NA   | NA | NA   | 1.84 | NA |
| Mir200a  | NA   | NA | NA   | 0.61 | NA |
| Mir200b  | NA   | NA | NA   | 4.82 | NA |
| Mir200c  | NA   | NA | NA   | 0.18 | NA |



|          |    |      |      |       |    |
|----------|----|------|------|-------|----|
| Mir202   | NA | NA   | NA   | 0     | NA |
| Mir203   | NA | NA   | NA   | 0.88  | NA |
| Mir204   | NA | NA   | NA   | 1.32  | NA |
| Mir206   | NA | NA   | NA   | 0.25  | NA |
| Mir208a  | NA | NA   | NA   | 3.95  | NA |
| Mir21    | NA | NA   | NA   | 0.08  | NA |
| Mir210   | NA | NA   | NA   | 0.76  | NA |
| Mir211   | NA | NA   | NA   | 1.12  | NA |
| Mir212   | NA | NA   | NA   | 1.22  | NA |
| Mir215   | NA | NA   | NA   | 1.45  | NA |
| Mir216a  | NA | NA   | NA   | 0.67  | NA |
| Mir217   | NA | NA   | NA   | 1.66  | NA |
| Mir218-1 | NA | NA   | NA   | 25.61 | NA |
| Mir218-2 | NA | NA   | NA   | 1.21  | NA |
| Mir219-1 | NA | NA   | NA   | 2.6   | NA |
| Mir219-2 | NA | NA   | NA   | 0.04  | NA |
| Mir221   | NA | NA   | NA   | 0.98  | NA |
| Mir222   | NA | NA   | NA   | 0.63  | NA |
| Mir224   | NA | NA   | NA   | 1.41  | NA |
| Mir22hg  | NA | 0.93 | 1.97 | NA    | NA |
| Mir23a   | NA | NA   | NA   | 0.27  | NA |
| Mir23b   | NA | NA   | NA   | 0.66  | NA |
| Mir24-2  | NA | NA   | NA   | 1.33  | NA |
| Mir25    | NA | NA   | NA   | 0.9   | NA |
| Mir26b   | NA | NA   | NA   | 0.66  | NA |
| Mir27a   | NA | NA   | NA   | 0     | NA |
| Mir27b   | NA | NA   | NA   | 0     | NA |
| Mir28    | NA | NA   | NA   | 0.84  | NA |
| Mir296   | NA | NA   | NA   | 0.8   | NA |
| Mir299   | NA | NA   | NA   | 0.31  | NA |
| Mir29a   | NA | NA   | NA   | 1.85  | NA |
| Mir29c   | NA | NA   | NA   | 0     | NA |
| Mir302a  | NA | NA   | NA   | 1.69  | NA |
| Mir302b  | NA | NA   | NA   | 2.28  | NA |
| Mir30a   | NA | NA   | NA   | 1.4   | NA |
| Mir30b   | NA | NA   | NA   | 0.58  | NA |
| Mir30d   | NA | NA   | NA   | 0.42  | NA |
| Mir30e   | NA | NA   | NA   | 0     | NA |
| Mir31    | NA | NA   | NA   | 0     | NA |
| Mir32    | NA | NA   | NA   | 0.52  | NA |
| Mir326   | NA | NA   | NA   | 1.78  | NA |

|          |      |      |      |      |      |
|----------|------|------|------|------|------|
| Mir330   | NA   | NA   | NA   | 0.17 | NA   |
| Mir331   | NA   | NA   | NA   | 1.12 | NA   |
| Mir339   | NA   | NA   | NA   | 1.09 | NA   |
| Mir34a   | NA   | NA   | NA   | 1.82 | NA   |
| Mir34b   | NA   | NA   | NA   | 0.55 | NA   |
| Mir375   | NA   | NA   | NA   | 0.15 | NA   |
| Mir376c  | NA   | NA   | NA   | 0.11 | NA   |
| Mir377   | NA   | NA   | NA   | 0    | NA   |
| Mir382   | NA   | NA   | NA   | 1.87 | NA   |
| Mir412   | NA   | NA   | NA   | 0    | NA   |
| Mir425   | NA   | NA   | NA   | 1.24 | NA   |
| Mir431   | NA   | NA   | NA   | 0.15 | NA   |
| Mir455   | NA   | NA   | NA   | 1.53 | NA   |
| Mir485   | NA   | NA   | NA   | 0.34 | NA   |
| Mir494   | NA   | NA   | NA   | 0.63 | NA   |
| Mir495   | NA   | NA   | NA   | 6.04 | NA   |
| Mir503   | NA   | NA   | NA   | 0    | NA   |
| Mir504   | NA   | NA   | NA   | 0.55 | NA   |
| Mir671   | NA   | NA   | NA   | 1.28 | NA   |
| Mir675   | NA   | NA   | NA   | 0.62 | NA   |
| Mir7-2   | NA   | NA   | NA   | 1.59 | NA   |
| Mir711   | NA   | NA   | NA   | 1.25 | NA   |
| Mir9-1   | NA   | NA   | NA   | 2.14 | NA   |
| Mir9-3   | NA   | NA   | NA   | 1.26 | NA   |
| Mir93    | NA   | NA   | NA   | 1.44 | NA   |
| Mir96    | NA   | NA   | NA   | 1.04 | NA   |
| Mir98    | NA   | NA   | NA   | 1.28 | NA   |
| Mir99a   | NA   | NA   | NA   | 0.89 | NA   |
| Mir99b   | NA   | NA   | NA   | 0.28 | NA   |
| Mirlet7b | NA   | NA   | NA   | 2.6  | NA   |
| Mirlet7d | NA   | NA   | 1.02 | 0.86 | NA   |
| Mirlet7e | NA   | NA   | NA   | 1.02 | NA   |
| Mirlet7g | NA   | NA   | NA   | 1.98 | NA   |
| Mirlet7i | NA   | NA   | NA   | 1.13 | NA   |
| Mis12    | NA   | 2.02 | 1.69 | 0.32 | 0    |
| Mis18a   | NA   | 0    | 2.61 | 2.09 | NA   |
| Mis18bp1 | NA   | 1.06 | 1.12 | 1.06 | NA   |
| Misp     | NA   | 1.75 | 2.19 | 1.09 | NA   |
| Mitd1    | NA   | NA   | 0.69 | NA   | 0.52 |
| Mitf     | 0.13 | 0    | 2.6  | 1.18 | 0.04 |
| Mix11    | 2.22 | NA   | 2.89 | 1.77 | 0    |

|         |      |      |      |      |      |
|---------|------|------|------|------|------|
| Mki67   | 0.72 | 0.7  | 3.76 | 0    | 0    |
| Mki67ip | 0    | NA   | 1.4  | 1.13 | 0    |
| Mkks    | 1.12 | 1.9  | 0.21 | 0    | 1.4  |
| Mkl1    | 1.26 | 1.07 | 0.22 | 1.78 | 0    |
| Mkl2    | 1.78 | 0    | 1.94 | 0.66 | 1.62 |
| Mkln1   | 0    | 1.87 | 0.71 | 0    | 1.05 |
| Mknk1   | 0.34 | 1.97 | 1.59 | 0    | 4.33 |
| Mknk2   | 0.16 | 0.64 | 2.28 | 1.13 | 3.46 |
| Mkrn1   | 0    | 1.05 | 0.97 | 2.87 | 1.53 |
| Mkrn2   | 0.03 | 0.83 | 1.9  | 0.85 | 0    |
| Mkrn3   | 0    | 1.04 | 0.59 | 0.31 | NA   |
| Mks1    | NA   | 0.86 | 0.69 | 0.91 | 0    |
| Mkx     | NA   | NA   | 1.82 | 0.63 | 0.06 |
| Mlana   | 0    | 0.81 | 1.71 | 1.87 | 0    |
| Mlc1    | 1.8  | 0.22 | 0    | 0    | 7.33 |
| Mlec    | NA   | 0.79 | 0.69 | 4.42 | 1.56 |
| Mlf1    | 0    | 0.45 | 2.61 | 3.86 | 1.4  |
| Mlf1ip  | 0    | 1.13 | 2.22 | NA   | 2.15 |
| Mlf2    | 0.18 | 0    | 3.72 | 0    | 0    |
| Mlh1    | 0.19 | 0.02 | 0.88 | 1.14 | 0    |
| Mlh3    | 0.71 | 1.49 | 0.31 | 4.34 | 1.1  |
| Mlip    | NA   | 2.03 | 0.87 | 6.68 | NA   |
| Mlk1    | NA   | NA   | 1.72 | 0    | 0    |
| Mll     | 0.47 | NA   | NA   | NA   | NA   |
| Mll2    | NA   | NA   | NA   | NA   | 0.39 |
| Mll3    | NA   | NA   | NA   | NA   | 0.47 |
| Mll5    | 1.8  | NA   | NA   | NA   | 0.59 |
| Mllt1   | 0    | 1.6  | 0.86 | 3.45 | 0.68 |
| Mllt10  | 1.02 | 0.61 | 0.09 | 0.84 | 0.61 |
| Mllt11  | NA   | 0    | 0.93 | 0.7  | 0    |
| Mllt3   | 0.91 | 0    | 1.78 | 0.49 | 3.12 |
| Mllt4   | 0.46 | 0.66 | 0.74 | 2.36 | 0    |
| Mllt6   | 0    | NA   | 0.88 | 1.64 | 0    |
| Mllt7   | 2.52 | NA   | NA   | NA   | NA   |
| Mlph    | 4.06 | 0.79 | 0.92 | 2.1  | 2.25 |
| Mlst8   | NA   | 0.64 | 0.02 | 1.47 | 0    |
| Mlstd1  | 3.8  | NA   | NA   | NA   | NA   |
| Mlx     | NA   | 0    | 3.3  | 0.15 | 1.23 |
| Mlxip   | NA   | 1.34 | 0.55 | 1.5  | 1.61 |
| Mlxipl  | NA   | 3.07 | 2.5  | 1.03 | 1.39 |
| Mlycd   | 0.06 | 0.48 | 1.21 | 0    | 0    |

|        |      |      |      |      |      |
|--------|------|------|------|------|------|
| Mlze   | 0.31 | NA   | NA   | NA   | NA   |
| Mmaa   | 0.97 | NA   | 1.25 | 0    | 0    |
| Mmab   | 0.25 | NA   | 1.37 | 0.85 | 0.35 |
| Mmachc | NA   | 1.89 | 0.42 | 0.79 | 0    |
| Mmadhc | NA   | 0    | 3.41 | 0.55 | 0    |
| Mmd    | 0    | 0    | 0.55 | 1.45 | 0.59 |
| Mmd2   | 0.39 | NA   | 0.73 | 1.79 | 2.12 |
| Mme    | 0    | 3.56 | 3.76 | 1.41 | 0    |
| Mmel1  | NA   | NA   | 2.07 | 0.89 | NA   |
| Mmgt1  | NA   | NA   | 2.37 | 0.57 | 3.96 |
| Mmp10  | 0.32 | 1.2  | 2.44 | 0    | 0    |
| Mmp11  | 2.92 | 1.69 | 2.33 | 1.63 | 4.92 |
| Mmp12  | 0.83 | 1.02 | 0    | 1.56 | 1.06 |
| Mmp13  | 0.33 | 0.12 | 1.15 | 0.64 | 1.44 |
| Mmp14  | 0    | 0.7  | 2.58 | 0.49 | 0    |
| Mmp15  | 1.08 | 1.93 | 1.01 | 1.05 | 1.39 |
| Mmp16  | 0    | 0.59 | 0.62 | 3.29 | 1.33 |
| Mmp17  | 1.44 | 0.32 | 6.83 | 4.2  | 0    |
| Mmp19  | 0.49 | 1.49 | 1.94 | 1.7  | 3.01 |
| Mmp2   | 0    | 1.25 | 2.33 | 0.8  | 0    |
| Mmp20  | 0    | 1.18 | 1.17 | 0    | 3.13 |
| Mmp21  | 0.26 | NA   | NA   | 0.81 | NA   |
| Mmp24  | 0.12 | 0.76 | 0.58 | 0.99 | 0    |
| Mmp25  | 0.52 | NA   | NA   | 0.84 | NA   |
| Mmp27  | NA   | NA   | NA   | 1.1  | NA   |
| Mmp28  | 0.89 | NA   | NA   | 1.47 | NA   |
| Mmp3   | 1.79 | 0    | 1.98 | 0.84 | 9.3  |
| Mmp7   | 0    | 2.23 | 0.26 | 1.6  | 4.36 |
| Mmp8   | 1.32 | 0.68 | 0    | 1.62 | 0    |
| Mmp9   | 0.69 | 0.36 | 3.71 | 0.94 | 0    |
| Mmrn1  | 0    | 1.34 | 2.13 | 3.3  | 1.48 |
| Mmrn2  | 0.48 | 0.78 | 0.47 | 1.73 | 1.6  |
| Mms19  | NA   | 0    | 0    | NA   | 0    |
| Mms19l | 0    | NA   | NA   | NA   | NA   |
| Mms22l | NA   | NA   | NA   | 0.14 | NA   |
| Mn1    | NA   | 1.49 | 3.65 | 0    | 0    |
| Mnat1  | 0.4  | 1.59 | 2.81 | 0    | 0    |
| Mnd1   | NA   | NA   | 0.2  | NA   | 0    |
| Mnda   | NA   | 1.47 | 1.65 | 0.72 | NA   |
| Mnf1   | NA   | NA   | 0.35 | 0    | NA   |
| Mns1   | 0.15 | 2.91 | 0.86 | 1.35 | 0    |

|         |      |      |      |      |      |
|---------|------|------|------|------|------|
| Mnt     | 0    | 0.67 | 2.51 | 0.64 | 0    |
| Mnx1    | NA   | 0.91 | 3.01 | 0.95 | 2.39 |
| Moap1   | 0.5  | NA   | NA   | NA   | NA   |
| Mob1a   | NA   | 0.12 | 2.08 | 0.1  | NA   |
| Mob1b   | NA   | NA   | 2.27 | 2.14 | NA   |
| Mob2    | NA   | NA   | 2.32 | 0.61 | NA   |
| Mob3a   | NA   | NA   | 4.62 | 1.72 | NA   |
| Mob3b   | NA   | 1.83 | 1.8  | 0    | NA   |
| Mob3c   | NA   | NA   | 1.4  | 0    | NA   |
| Mob4    | NA   | 0.93 | 2.1  | 1.51 | NA   |
| Mobk1b  | 0.25 | NA   | NA   | NA   | NA   |
| Mobkl1a | NA   | NA   | NA   | NA   | 0    |
| Mobkl1b | NA   | NA   | NA   | NA   | 0.65 |
| Mobkl2a | NA   | NA   | NA   | NA   | 1.22 |
| Mobkl2b | 1.46 | NA   | NA   | NA   | 1.77 |
| Mobkl2c | 0    | NA   | NA   | NA   | 0    |
| Mobkl3  | NA   | NA   | NA   | NA   | 0    |
| Mobp    | 0.19 | 0.8  | 0.89 | 0.23 | 0    |
| Mocos   | 1.44 | 1.43 | 1.11 | 0.23 | 0    |
| Mocs1   | 2.36 | 1.46 | 1.92 | 0.72 | 0.32 |
| Mocs2   | 1.05 | 0.88 | 1.8  | 0.65 | 0    |
| Mocs3   | 0    | 0.58 | 2.07 | 1.51 | 1.12 |
| Mog     | 0.98 | 0.54 | 0    | 1.98 | 0    |
| Mogat1  | 0.5  | NA   | 2.57 | 3.05 | NA   |
| Mogat2  | 0    | 0.79 | 1.51 | 2.84 | 4.46 |
| Mogs    | NA   | 2.65 | 1.01 | 7.6  | 0    |
| Mon1a   | NA   | NA   | 1.61 | 2.26 | 5.49 |
| Mon1b   | NA   | 1.72 | 0.43 | NA   | 0    |
| Mon2    | NA   | 0.71 | 1.91 | 0    | 0.36 |
| Morc1   | NA   | 0.35 | 0.42 | 0    | 0.57 |
| Morc3   | NA   | 0.99 | 0.99 | 0.93 | 0.26 |
| Morc4   | NA   | 0    | 0.96 | 1.85 | 1.41 |
| Morf4l1 | 0    | 0.57 | 3.61 | 1.04 | 0.6  |
| Morf4l2 | 0.27 | 1.77 | 1.61 | 0.61 | 0.3  |
| Morn1   | NA   | 1.4  | 0    | 0.04 | 0    |
| Morn2   | NA   | NA   | 3.6  | 1.6  | 4.32 |
| Morn3   | NA   | NA   | 1.62 | 2.72 | 5.06 |
| Morn4   | NA   | NA   | 0.2  | 0.47 | 0.83 |
| Morn5   | NA   | NA   | 1.36 | 1.66 | 0    |
| Mos     | 0.42 | 2.65 | 0.4  | 1.98 | 6.32 |
| Mosc2   | NA   | NA   | NA   | NA   | 2.27 |

|           |      |      |      |      |      |
|-----------|------|------|------|------|------|
| Mospd1    | 0    | 1.28 | 1.04 | 0.39 | 0    |
| Mospd2    | 0.98 | 0.09 | 2.34 | 0.65 | 1    |
| Mospd3    | 0.01 | 2.85 | 0.3  | 0    | 0    |
| Mov10     | 0.51 | NA   | 1.44 | 0.3  | 1.41 |
| Mov10l1   | 0    | NA   | 0.19 | 0.7  | 1.27 |
| Moxd1     | 2.02 | 2.36 | 1.25 | 1.91 | 1.23 |
| Mpc1      | NA   | 1.92 | 1.75 | 1.75 | NA   |
| Mpc2      | NA   | 1.98 | 1.09 | 0    | NA   |
| Mpdu1     | 0    | 0    | 0.25 | 0    | 1.91 |
| Mpdz      | 0.41 | 0.77 | 0.05 | 0    | 0    |
| Mpeg1     | NA   | NA   | 3.28 | 2.13 | 0    |
| Mpg       | 0.88 | 1.38 | 0.57 | 0.62 | 2.34 |
| Mphosph1  | 0.01 | NA   | NA   | NA   | NA   |
| Mphosph10 | 0    | 1.88 | 0.57 | 0.36 | 2.32 |
| Mphosph6  | 0.43 | 1.44 | 2.23 | 0.63 | 0.23 |
| Mphosph8  | NA   | 1.04 | 0.66 | NA   | 0    |
| Mphosph9  | 0    | 0    | 0.54 | 1.15 | 0    |
| Mpi       | NA   | 1.13 | 1.93 | 0.62 | 3.18 |
| Mpl       | 0    | 0.93 | 1.52 | 1.26 | 1.47 |
| Mplkip    | NA   | NA   | 2.21 | 1.02 | NA   |
| Mpnd      | NA   | NA   | 1.18 | 0.66 | 1.44 |
| Mpo       | 0    | 0.28 | 0.02 | 0.87 | 1.13 |
| Mpp1      | 0    | 2.18 | 1.38 | 0.64 | 2.36 |
| Mpp2      | 1.37 | 0.89 | 2.25 | 1.18 | 4.17 |
| Mpp3      | 0    | 2.89 | 0.81 | 1.83 | 3.54 |
| Mpp4      | 0.36 | NA   | 1.57 | 0    | NA   |
| Mpp5      | 1.42 | 0.66 | 4.29 | 0.66 | 1.82 |
| Mpp6      | 0.44 | 1.18 | 0.43 | 2.55 | 0.69 |
| Mpp7      | 0.2  | NA   | 0    | 1.5  | 0.72 |
| Mppe1     | 0.05 | 0.16 | 0.37 | 1.18 | 0    |
| Mpped1    | NA   | 1.8  | 2.06 | 0.93 | 2.04 |
| Mpped2    | NA   | 0.56 | 1.19 | 0.37 | 1.57 |
| Mprip     | NA   | 0    | 0.63 | 2.4  | 0.63 |
| Mpst      | 3.77 | 3.01 | 1.53 | 1.18 | 0.55 |
| Mpv17     | 0.33 | 0    | 3.81 | 1.56 | 0    |
| Mpv17l1   | 1.06 | NA   | 1.88 | 0.9  | NA   |
| Mpv17l2   | NA   | NA   | 1.42 | 4.48 | 2.75 |
| Mpz       | 0.58 | 1.16 | 1.62 | 3.08 | 2.77 |
| Mpzl1     | 0.87 | 0.87 | 2.02 | 1.01 | 1.68 |
| Mpzl2     | NA   | 0.77 | 0.54 | 0.88 | 0    |
| Mpzl3     | NA   | NA   | 2.49 | 1.46 | 0    |

|         |      |      |      |      |      |
|---------|------|------|------|------|------|
| Mr1     | 0.02 | 1.82 | 0.77 | 3.42 | 1.55 |
| Mrap    | NA   | NA   | 0.75 | 1.07 | NA   |
| Mrap2   | NA   | NA   | 1.15 | 1.25 | 2.51 |
| Mras    | 0.46 | 2.64 | 1.38 | 1.4  | 0.07 |
| Mrc1    | 0.71 | 1.1  | 1.58 | 1.17 | NA   |
| Mrc2    | 0.54 | 0.87 | 1.59 | 0.61 | 1.69 |
| Mre11a  | 0.67 | 0.4  | 1.09 | 0.69 | 0.93 |
| Mreg    | NA   | 2.38 | 0.08 | 1.21 | 4.15 |
| Mrfap1  | NA   | NA   | 1.5  | 1.26 | 0    |
| Mrgbp   | NA   | 1.11 | 1.34 | 0    | NA   |
| Mrgprd  | 2.02 | NA   | NA   | 0.21 | NA   |
| Mrgpre  | NA   | NA   | NA   | 0.57 | NA   |
| Mrgprf  | 0.38 | NA   | 1.58 | 2.03 | 1.04 |
| Mrgprg  | NA   | NA   | NA   | 0    | NA   |
| Mrgprx1 | NA   | NA   | NA   | 0.8  | NA   |
| Mrgprx2 | NA   | NA   | NA   | 0.29 | NA   |
| Mri1    | NA   | NA   | 1.35 | 1.15 | 0    |
| Mrm1    | NA   | 1.51 | 1.66 | 1.39 | 0    |
| Mro     | 0    | NA   | 1.12 | 1.29 | 2.31 |
| Mroh1   | NA   | NA   | 0.6  | 0    | NA   |
| Mroh2a  | NA   | NA   | 1.45 | 4.39 | NA   |
| Mroh2b  | NA   | NA   | 1.41 | 0    | NA   |
| Mroh5   | NA   | NA   | NA   | 1.17 | NA   |
| Mroh8   | NA   | NA   | NA   | 1.59 | NA   |
| Mroh9   | NA   | 0.39 | 0    | 1.54 | NA   |
| Mrp63   | 0.55 | 1.22 | 0.67 | NA   | 0    |
| Mrpl1   | 0.17 | NA   | 0.59 | 1.6  | 0    |
| Mrpl10  | 0.89 | NA   | 2.5  | 0.91 | 0    |
| Mrpl11  | 0.19 | 0.15 | 1.3  | 1.12 | 0    |
| Mrpl12  | 0.01 | 1.86 | 0.65 | 0.24 | 0.01 |
| Mrpl13  | 0    | 0    | 0.76 | 0    | 2.03 |
| Mrpl14  | 1.08 | NA   | 2.84 | 0.39 | 1.58 |
| Mrpl15  | 0    | 0.74 | 1.02 | 1.35 | 0    |
| Mrpl16  | 0.77 | 1.61 | 1.26 | 1.3  | 0    |
| Mrpl17  | 0    | 0    | 0.49 | 0.83 | 1.89 |
| Mrpl18  | 0.03 | 1.74 | 2.17 | 1.99 | 0.32 |
| Mrpl19  | 0    | 1.25 | 0.35 | 1.08 | 2.08 |
| Mrpl2   | 0.57 | 2.39 | 0.07 | 3.16 | 4.35 |
| Mrpl20  | 0.53 | 1.5  | 1.07 | 1.41 | 0.94 |
| Mrpl21  | 0    | NA   | 0.3  | 0    | 3.18 |
| Mrpl22  | 0.4  | 0    | 2.14 | 0.04 | 0    |

|         |      |      |      |      |      |
|---------|------|------|------|------|------|
| Mrpl23  | 0    | 0    | 0.46 | 1.66 | 2.59 |
| Mrpl24  | 0.51 | 0.86 | 0.18 | NA   | 2.56 |
| Mrpl27  | 0.25 | NA   | 0.62 | 0.65 | 6.64 |
| Mrpl28  | 0.75 | 1.92 | 2.35 | 0    | 2.16 |
| Mrpl3   | 0.13 | 1.15 | 1.93 | 0.84 | 3.69 |
| Mrpl30  | 1.21 | NA   | 0.27 | 1.25 | 4.81 |
| Mrpl32  | 0.28 | NA   | 0.96 | 1.14 | 0    |
| Mrpl33  | 0.57 | 0.09 | 0.77 | 0    | 0    |
| Mrpl34  | 0.2  | 0.79 | 2.12 | 0.66 | 0    |
| Mrpl35  | 0    | 0.13 | 0.34 | 0.92 | 0    |
| Mrpl36  | 0.4  | NA   | 0.8  | 1.05 | 0    |
| Mrpl37  | 0.22 | NA   | 0.3  | 0.52 | 0    |
| Mrpl38  | 0    | NA   | 0    | 2.33 | 0    |
| Mrpl39  | 0.72 | 1.36 | 0.03 | 0.7  | 0    |
| Mrpl4   | 0.89 | 3.18 | 0.61 | 1.83 | 1.07 |
| Mrpl40  | 1.08 | 1.11 | 0.4  | 0.8  | 0    |
| Mrpl41  | NA   | 0.4  | 0.85 | 1.91 | 0    |
| Mrpl42  | NA   | 0.42 | 0.79 | 0    | 0    |
| Mrpl43  | 0.42 | NA   | 1.99 | 0.99 | 0    |
| Mrpl44  | 0.47 | 0.88 | 2.8  | 2.47 | 3.06 |
| Mrpl45  | 0    | NA   | 0.4  | 1.1  | 2.28 |
| Mrpl46  | 0.83 | 2.17 | 1.61 | 1.2  | 0    |
| Mrpl47  | NA   | NA   | 0.21 | 0.94 | 0.02 |
| Mrpl48  | 0.23 | 1.76 | 0    | 2.17 | 3.11 |
| Mrpl49  | 0.3  | 0    | 1.61 | 0.59 | 0    |
| Mrpl50  | 0.67 | NA   | 2.37 | 1.23 | 0    |
| Mrpl51  | 0.1  | NA   | 1.33 | 0.33 | 0    |
| Mrpl52  | 1.04 | 1.5  | 1.63 | 0.09 | 0.58 |
| Mrpl53  | 0    | NA   | NA   | NA   | NA   |
| Mrpl54  | 0.47 | NA   | 1.77 | 1.75 | 4.64 |
| Mrpl55  | 0.33 | NA   | 2.59 | 0.38 | 1.59 |
| Mrpl9   | 0    | 0.49 | 1.2  | 0.75 | 2.56 |
| Mrps10  | 0    | 0.99 | 1.02 | 0.69 | 0    |
| Mrps11  | 0.7  | 1.73 | 1.46 | 0    | 2    |
| Mrps12  | 0.04 | 0.92 | 2.16 | NA   | 0.07 |
| Mrps14  | 3.24 | 0.3  | 0.52 | 0.78 | 0    |
| Mrps15  | 0.35 | 0    | 1.02 | 0    | 0    |
| Mrps16  | 0.08 | 3.62 | 0.29 | 0.89 | 0    |
| Mrps17  | 0.28 | NA   | NA   | 1.36 | NA   |
| Mrps18a | 1    | 0.4  | 0.66 | NA   | 1.42 |
| Mrps18b | 0.82 | 2.3  | 2.49 | 0.13 | 2.22 |



|         |      |      |      |      |      |
|---------|------|------|------|------|------|
| Mrps18c | 0.17 | 1.38 | 0.06 | NA   | 2.16 |
| Mrps2   | 0.12 | 1.99 | 0.66 | 0.83 | 0    |
| Mrps21  | 0    | NA   | 3.27 | 0    | 0    |
| Mrps22  | 0.35 | 0    | 3.59 | 0    | 0    |
| Mrps23  | 0.25 | NA   | 1.1  | 0.82 | 0    |
| Mrps24  | 0.38 | NA   | 1.54 | 1.79 | 0    |
| Mrps25  | 0.16 | NA   | 1.16 | 1.51 | 0    |
| Mrps26  | 0.26 | NA   | 1.12 | 0.24 | 0    |
| Mrps27  | 0    | 2.26 | 1.28 | 1.21 | 0    |
| Mrps28  | 0.06 | 0    | 1.44 | 0.53 | 3.57 |
| Mrps30  | 0    | 1.29 | 1.64 | 0.89 | 4.14 |
| Mrps31  | 0.72 | 1.23 | 1.4  | 0.72 | 0    |
| Mrps33  | 0.34 | 0.6  | 1.88 | 0.92 | 0    |
| Mrps34  | 0.05 | 1.54 | 5.8  | 3.48 | 0    |
| Mrps35  | 0.57 | 0.82 | 1.14 | 1.46 | 0    |
| Mrps36  | 0.7  | NA   | 2.17 | NA   | 0    |
| Mrps5   | 0.19 | NA   | 0.84 | 1.16 | 0.52 |
| Mrps6   | 0.78 | NA   | 0.87 | 0    | 3.79 |
| Mrps7   | 0.07 | 1.46 | 0    | 0.32 | 3.07 |
| Mrps9   | 0.29 | NA   | 0.64 | 2.1  | 3.96 |
| Mrrf    | 0    | NA   | 0.99 | 0.04 | 5.6  |
| Mrs2    | NA   | 0.8  | 1.63 | 0.36 | 0    |
| Mrto4   | NA   | 2.35 | 0.66 | 2.12 | 2.29 |
| Mrvi1   | 0.3  | NA   | 2.03 | 0.65 | 0    |
| Ms4a1   | NA   | 0    | 1.15 | 0    | 0    |
| Ms4a10  | 2.18 | NA   | NA   | 0.91 | NA   |
| Ms4a13  | NA   | NA   | NA   | 1.09 | NA   |
| Ms4a15  | NA   | NA   | 0.37 | 0.7  | NA   |
| Ms4a2   | 1.36 | 0.85 | 0.27 | 2.29 | 1.23 |
| Ms4a3   | 1.06 | 0.5  | 0.6  | 4.98 | 0    |
| Ms4a4a  | NA   | NA   | NA   | 0.06 | NA   |
| Ms4a5   | 0.84 | NA   | NA   | 0    | NA   |
| Ms4a7   | 0    | NA   | 2.39 | NA   | 0    |
| Msantd1 | NA   | NA   | 0.58 | 0.62 | NA   |
| Msantd2 | NA   | 0    | 0.69 | 0.47 | NA   |
| Msantd3 | NA   | NA   | 2.32 | 0.22 | NA   |
| Msantd4 | NA   | NA   | 1.23 | 0.99 | NA   |
| Msc     | 0    | 0    | 1.62 | 1.5  | 0    |
| Msgn1   | 0.73 | NA   | NA   | 2.17 | NA   |
| Msh2    | 0    | 0    | 1.43 | 0    | 1.51 |
| Msh3    | 0    | 1.18 | 0.66 | 0.6  | 0.91 |

|         |      |      |      |      |      |
|---------|------|------|------|------|------|
| Msh4    | 3.88 | 1.1  | 2.06 | NA   | 0    |
| Msh5    | 0.61 | NA   | NA   | NA   | NA   |
| Msh6    | 0.11 | 0    | 3.49 | NA   | 0.18 |
| Msi1    | NA   | 1.05 | 0.6  | 2.45 | 0.53 |
| Msi2    | NA   | NA   | 0.66 | 1.3  | 0    |
| Msl1    | NA   | 1.74 | 1.5  | 1.13 | 0    |
| Msl2    | NA   | 2.02 | 2.74 | 2.76 | 3.2  |
| Msl3    | NA   | 3.43 | 2    | 0.01 | 1.07 |
| Msln    | 4.02 | 1.43 | 0.26 | 2.39 | 0.68 |
| Msemb   | 0    | 2.09 | 1.28 | 0.66 | 0    |
| Msmmp   | NA   | NA   | NA   | 3.68 | NA   |
| Msn     | 0.21 | 2.63 | 0.4  | 0.06 | 0.38 |
| Msr1    | 1.12 | 0.29 | 1.28 | 0.87 | 1.55 |
| Msra    | 0    | 0.04 | 0.65 | 5.18 | 0    |
| Msrbl   | NA   | 0.02 | 2.74 | 2.28 | NA   |
| Msrbl2  | NA   | 4.85 | 1.29 | 3.95 | 0    |
| Msrbl3  | NA   | NA   | 1.51 | 0.84 | 1.4  |
| Mss51   | NA   | NA   | 3.31 | 0.43 | NA   |
| Mst1    | 0.23 | 1.43 | 5.89 | 0.11 | 0    |
| Mst1r   | 0    | 3.26 | 0.52 | 1.49 | 1.52 |
| Mstn    | NA   | NA   | NA   | 4.55 | NA   |
| Msto1   | NA   | NA   | 1.91 | NA   | 3.42 |
| Msx1    | 0.34 | 1.93 | 0.29 | 0    | 0    |
| Msx2    | 0.11 | 0.49 | 1.18 | 2.44 | 1.66 |
| Mt3     | 1.95 | 1.31 | 1.47 | 1.45 | 0    |
| Mt4     | 0.35 | 0.58 | 0.53 | 2.72 | 2.72 |
| Mta1    | 3.35 | 0    | 0.03 | 2.07 | 0    |
| Mta2    | 0    | 0.39 | 2.06 | 0.59 | 2.15 |
| Mta3    | 0.89 | NA   | 0.99 | 0.47 | 0.31 |
| Mtac2d1 | 0    | NA   | NA   | NA   | NA   |
| Mtap    | 0    | 0.78 | 0.64 | NA   | 0    |
| Mtbp    | 0.06 | NA   | 2.69 | 0.59 | 4.56 |
| Mtch1   | 1.44 | 0    | 2.87 | 0.86 | 0    |
| Mtch2   | 0    | 0.86 | 0.68 | 0.27 | 0    |
| Mtcp1   | 0    | NA   | 0.94 | NA   | 0.26 |
| Mtdh    | NA   | 0.39 | 1.21 | 0.81 | 2.66 |
| Mterf   | 0.4  | 1.72 | 0.72 | 0.75 | 0    |
| Mterfd1 | NA   | 0    | 0.73 | 0    | 3.35 |
| Mterfd2 | NA   | 1.18 | 0.25 | NA   | 4.59 |
| Mterfd3 | NA   | NA   | 1.45 | 1.43 | 0    |
| Mtf1    | 1.33 | 0    | 0.89 | 0    | 0    |

|         |      |      |      |      |      |
|---------|------|------|------|------|------|
| Mtf2    | 0.12 | 0.88 | 1.03 | 1.01 | 1.1  |
| Mtfmt   | NA   | NA   | 1.72 | 1.68 | 2.24 |
| Mtftp1  | NA   | NA   | 0.39 | 2.23 | NA   |
| Mtfr1   | NA   | 0.84 | 0.48 | 0.98 | 0.73 |
| Mtfr11  | NA   | NA   | 1.46 | 0.98 | NA   |
| Mtfr2   | NA   | NA   | 2.76 | 0.74 | NA   |
| Mtg1    | NA   | 0.51 | 0.41 | 2.78 | 1.07 |
| Mthfd1  | 0.2  | 0    | 1.19 | 0.92 | 0    |
| Mthfd11 | NA   | NA   | 1.61 | 0    | 0    |
| Mthfd2  | 1.71 | 2.76 | 2.09 | 0.81 | 0.59 |
| Mthfd21 | NA   | 2.89 | 0.64 | 0.61 | 0.61 |
| Mthfr   | 4.44 | 0.31 | 0.61 | 0    | 0.16 |
| Mthfs   | 5.56 | 0    | 2.65 | NA   | 0.07 |
| Mthfsd  | NA   | 0    | 0.44 | 2.68 | 0    |
| Mtif2   | 0.81 | 0.07 | 1.88 | 1.45 | 0    |
| Mtif3   | NA   | NA   | 0.36 | 1.38 | 0    |
| Mtl5    | 0    | 1.63 | 0.97 | 1.38 | 1.28 |
| Mtm1    | 0.37 | 0.59 | 0.19 | 2.14 | 1.87 |
| Mtmr1   | 1    | 0.81 | 0    | 0.72 | 1.56 |
| Mtmr10  | NA   | 2.62 | 0.62 | 2.01 | 0.35 |
| Mtmr11  | NA   | 1.34 | 1.46 | 0.18 | 1.58 |
| Mtmr12  | NA   | 1.51 | 1.27 | 0    | 4.32 |
| Mtmr14  | NA   | 0.57 | 6.28 | 0.29 | 0.41 |
| Mtmr2   | 0    | 1.79 | 0.15 | 0.34 | 0    |
| Mtmr3   | 0.26 | 1.38 | 1.32 | 0    | 2.18 |
| Mtmr4   | 0.49 | 1.22 | 5.26 | 0    | 0.27 |
| Mtmr6   | 3.97 | 0.39 | 0.97 | 0.85 | 1.48 |
| Mtmr7   | 1.74 | 0.78 | 1.77 | 0.75 | 0.18 |
| Mtmr9   | 0.5  | 0.56 | 0.97 | 0    | 0    |
| Mtnr1a  | 0    | 2.19 | 0.07 | 0    | 3.46 |
| Mtnr1b  | 2.16 | NA   | NA   | 0    | NA   |
| Mto1    | 2.42 | 0.13 | 1.2  | 0.58 | 1.72 |
| Mtor    | NA   | 0.45 | 1.2  | 0    | 0.7  |
| Mtpap   | NA   | 0    | 0.59 | NA   | 0    |
| Mtpn    | 0.51 | NA   | 1.46 | NA   | 1.31 |
| Mtr     | 0    | 0    | 0    | 0    | 0    |
| Mtrf1   | 2.92 | NA   | NA   | 1.01 | NA   |
| Mtrf11  | 0.26 | 2.2  | 0.03 | 0    | 3.29 |
| Mtrr    | 0.61 | 0.81 | 0.43 | 1.8  | 1.67 |
| Mtss1   | 0.42 | 0.48 | 2.37 | 1.71 | 1    |
| Mtss11  | NA   | 2.47 | 1.68 | 1.2  | NA   |

|        |       |      |      |       |      |
|--------|-------|------|------|-------|------|
| Mttp   | 11.57 | 1.56 | 1.17 | 0     | 2.68 |
| Mtus1  | 1.18  | 1.77 | 1.57 | 3.8   | 0    |
| Mtus2  | NA    | 0.44 | 0.13 | 1.72  | NA   |
| Mtx1   | 0.24  | 1.25 | 2.17 | 19.78 | 1.99 |
| Mtx2   | 0     | 2.63 | 1.61 | 0.86  | 3.53 |
| Mtx3   | NA    | NA   | 0.82 | 0.92  | 0    |
| Muc1   | 0.78  | 0    | 6.33 | 0.31  | 0    |
| Muc13  | NA    | 3.64 | 0.99 | 0.42  | 0.74 |
| Muc15  | NA    | NA   | 0.15 | 1.65  | 3.77 |
| Muc16  | NA    | 0.54 | 0.56 | NA    | 6.38 |
| Muc2   | NA    | 2.1  | 0.53 | 0.85  | 2.71 |
| Muc20  | 0.12  | NA   | 0.43 | 1.51  | 1.46 |
| Muc3   | NA    | NA   | 0.1  | NA    | NA   |
| Muc4   | 0.56  | 0.9  | 0.81 | 1.6   | 2.02 |
| Muc5ac | NA    | 1.56 | 0.55 | NA    | 0    |
| Muc5b  | NA    | 2.13 | 0.74 | 1.11  | 0    |
| Muc6   | 0.44  | NA   | NA   | 0.02  | NA   |
| Mucdhl | 3.3   | NA   | NA   | NA    | NA   |
| Muc11  | NA    | NA   | 3.46 | 0     | NA   |
| Mudeng | NA    | NA   | NA   | NA    | 0    |
| Mul1   | NA    | 0.08 | 0.73 | 0.08  | 0.7  |
| Mum1   | 0.26  | 0.67 | 3.44 | 1.96  | 0    |
| Mum111 | 1.49  | NA   | 0.26 | 0.81  | 0.44 |
| Murc   | NA    | NA   | 1.56 | 0.4   | 1    |
| Mus81  | 0     | 0.71 | 1.72 | 0.4   | 0.55 |
| Musk   | 0     | 0.49 | 1.08 | 2.11  | 2.65 |
| Mustn1 | 0.39  | 1.51 | 1.18 | 3.06  | 0.91 |
| Mut    | 1.45  | 1.79 | 0.99 | 0.04  | 0    |
| Muted  | 0     | NA   | NA   | NA    | 0    |
| Mutyh  | 0     | 0    | 1.57 | 1.36  | 0    |
| Mvb12a | NA    | NA   | 0.15 | 0.94  | NA   |
| Mvb12b | NA    | 0.79 | 1.91 | 2.3   | NA   |
| Mvd    | 1.51  | 1.12 | 3.3  | 0.79  | 0    |
| Mvk    | 0.09  | 1.91 | 3.06 | 0.64  | 0    |
| Mvp    | 0.14  | 0.73 | 1.44 | 0.02  | 0    |
| Mx1    | 0.26  | 3.08 | 1.62 | 0     | 0    |
| Mx2    | 0.14  | 3.25 | 0    | 0.22  | 0    |
| Mxd1   | NA    | 0.83 | 1.91 | 2.07  | 0    |
| Mxd3   | 0     | 0    | 2.41 | 0.29  | 4.42 |
| Mxd4   | 0     | 0    | 0    | 0.41  | 0    |
| Mxi1   | 0.31  | 1.85 | 2.01 | 1.2   | 0    |

|         |      |      |      |      |      |
|---------|------|------|------|------|------|
| Mxra7   | NA   | 1.26 | 0.15 | 1.22 | 0.63 |
| Mxra8   | NA   | 0    | 0.83 | 0.96 | 1.39 |
| Myadm   | 0.27 | NA   | 0.84 | 0    | 0.04 |
| Myadml2 | NA   | NA   | 1.52 | 1.8  | 2.25 |
| Myb     | 0    | 1.07 | 0.28 | 2.85 | 0.57 |
| Mybbp1a | 0.03 | 2.11 | 0.73 | NA   | 2.27 |
| Mybl1   | NA   | 1.39 | 0.92 | 0.36 | 2.35 |
| Mybl2   | 1.01 | 0.69 | 1.39 | 0.61 | 0    |
| Mybpc1  | NA   | 0.63 | 0.5  | 1.13 | 2.43 |
| Mybpc2  | 0    | 1.18 | 0.17 | 0.71 | 1.33 |
| Mybpc3  | 0    | 0    | 0.9  | 1.24 | 0    |
| Mybph   | 3.33 | 1.24 | 1.25 | 1.36 | 0    |
| Mybphl  | NA   | NA   | NA   | 0.74 | NA   |
| Myc     | 0    | 1.89 | 2.08 | 0    | 8.79 |
| Mycbp   | 0.23 | 1.88 | 0.42 | NA   | 0.9  |
| Mycbp2  | NA   | 0    | 0.71 | 1.32 | 1.67 |
| Mycbpap | 0    | NA   | 1.5  | 1.69 | 0.3  |
| Mycl1   | NA   | 0    | 0.85 | 1.54 | 0    |
| Mycn    | NA   | 0.92 | 0.38 | 3.49 | 1.46 |
| Myct1   | 1.28 | 2.55 | 0.34 | 0.19 | 1.26 |
| Myd88   | 0.38 | 0.77 | 5.03 | 0    | 0    |
| Myef2   | 0.52 | 1.21 | 2.32 | 0.29 | 1.53 |
| Myeov2  | NA   | NA   | 0.2  | 0.69 | 0    |
| Myf5    | 1.44 | 0    | 0.92 | 0.42 | 0    |
| Myf6    | 2.47 | 0.04 | 5.46 | 0.95 | 4.51 |
| Myh1    | 1.49 | 1.18 | 0.83 | 1.25 | 2.33 |
| Myh10   | 0.38 | 0.61 | 1.49 | 0    | 4.13 |
| Myh11   | 0.27 | 0.33 | 1.17 | 0.3  | 0.13 |
| Myh13   | NA   | NA   | NA   | 0.6  | NA   |
| Myh14   | 3.12 | 1.11 | 0.98 | 0.71 | 0    |
| Myh15   | NA   | NA   | NA   | 0    | NA   |
| Myh2    | 4.45 | 1.03 | 1    | 2.23 | 4.93 |
| Myh3    | 1.34 | 3.36 | 4.1  | 1.71 | 0.53 |
| Myh4    | 0.04 | 0.81 | 2.71 | 1.04 | 0    |
| Myh6    | 0.92 | 1.57 | 0    | NA   | 0    |
| Myh7    | 1.19 | 1.17 | 0.23 | 0.56 | 0    |
| Myh7b   | NA   | 0.72 | 0.04 | 1.16 | 0    |
| Myh8    | 0    | 1.26 | 1.08 | 2.53 | 2.65 |
| Myh9    | 1.02 | 0    | 1.27 | 0    | 0    |
| Myl1    | 0.59 | 1.1  | 1.01 | 0.77 | 1.72 |
| Myl10   | NA   | 1.76 | 1.31 | 1.3  | 3.23 |

|         |      |      |      |      |      |
|---------|------|------|------|------|------|
| Myl12a  | NA   | 0    | 2.44 | NA   | NA   |
| Myl12b  | NA   | 0.92 | 0.9  | 0.22 | 0.13 |
| Myl2    | 0.73 | 2.3  | 1.52 | 1.71 | 0    |
| Myl3    | 1.29 | 1.48 | 2.21 | 1.24 | 0    |
| Myl4    | 0    | 0.48 | 0.18 | 1.35 | 0    |
| Myl6    | 1.2  | 2.77 | 3.19 | 0.31 | 2.98 |
| Myl6b   | NA   | 3.52 | 0    | 0    | 3.33 |
| Myl7    | 1    | 0.84 | 0    | 7.89 | 4.4  |
| Myl9    | 1.12 | 1.51 | 6.76 | 0    | 0    |
| Mylc2pl | 0.89 | NA   | NA   | NA   | NA   |
| Mylip   | 1.07 | 3.03 | 2.05 | 2.59 | 0    |
| Mylk    | 0.26 | 0.35 | 0.63 | 0.59 | 0    |
| Mylk2   | 0    | NA   | 4.42 | 0    | 0    |
| Mylk3   | NA   | 1.73 | 1.33 | 0.78 | 2    |
| Mylk4   | NA   | NA   | 0.56 | 0    | NA   |
| Mylpf   | 2.85 | 0.75 | 2.14 | 0.72 | 0    |
| Mynn    | 0    | 2.1  | 0.67 | 0    | 0.95 |
| Myo10   | 0.17 | 0.48 | 0.29 | 0    | 1.67 |
| Myo15b  | NA   | 0.59 | 2.67 | 0.85 | 0.96 |
| Myo16   | NA   | 1.47 | 0    | 3.11 | 2.58 |
| Myo18a  | 0.75 | 0    | 0.7  | 1.33 | NA   |
| Myo18b  | 0.42 | NA   | 2.45 | 1.28 | NA   |
| Myo19   | NA   | 1.01 | 1.82 | 2.57 | 0    |
| Myo1a   | 0.8  | 0.01 | 4.92 | 0    | 4.62 |
| Myo1b   | 0.62 | 0.99 | 1.54 | 1.11 | 1.14 |
| Myo1c   | 2.71 | 0.58 | 0.8  | 1.86 | 0.54 |
| Myo1d   | 0    | 1.1  | 2.05 | 0.25 | 0.07 |
| Myo1e   | 0.44 | 0    | 2.9  | 0    | 0.79 |
| Myo1f   | 0.82 | 2.64 | 0.98 | 1.41 | 0    |
| Myo1g   | 0.77 | NA   | 1.85 | 1.05 | 0    |
| Myo1h   | NA   | NA   | 2.58 | NA   | NA   |
| Myo3a   | 0    | 1.37 | 1.87 | 6.55 | 7.11 |
| Myo3b   | 0.01 | NA   | 1.45 | 0.66 | NA   |
| Myo5a   | 0.63 | 1.08 | 0.48 | 0    | 0    |
| Myo5b   | 4.14 | NA   | 0.17 | 1.15 | 0.24 |
| Myo5c   | 0.6  | 0    | 2.14 | 0.37 | 0.49 |
| Myo6    | 0    | 0.69 | 0.47 | NA   | 0    |
| Myo7a   | 0.49 | 1    | 1.23 | 0.7  | 0    |
| Myo7b   | 2.25 | 1    | 0.98 | 0.53 | 2.18 |
| Myo9a   | 1.47 | 0    | 0.88 | 0.01 | 1.85 |
| Myo9b   | 0    | 0.57 | 1.76 | 1.14 | 0    |

|         |      |      |      |      |      |
|---------|------|------|------|------|------|
| Myoc    | 0.55 | 1.31 | 0.23 | 2.13 | 2.05 |
| Myocd   | 0.05 | NA   | 1.02 | 0.64 | 4.54 |
| Myod1   | 0    | 0    | 0.44 | 1.84 | 3.56 |
| Myof    | NA   | 0    | 0.95 | 1.92 | 0.05 |
| Myog    | 5.56 | 2.96 | 0    | 1.09 | 5.27 |
| Myohd1  | 0.72 | NA   | NA   | NA   | NA   |
| Myom1   | 0    | 0.54 | 2.39 | 1.39 | 0    |
| Myom2   | 0    | 1.22 | 0.49 | 0.7  | 1.31 |
| Myom3   | 0.38 | NA   | 1.09 | 1.22 | 9.16 |
| Myot    | NA   | 0.2  | 2.64 | 1.01 | 0    |
| Myoz1   | 1.08 | 1.12 | 0.34 | 0.7  | 2.46 |
| Myoz2   | NA   | 0.47 | 0.04 | 1.22 | 0    |
| Myoz3   | 2.21 | 0.25 | 1.6  | 0.66 | 0    |
| Mypn    | NA   | NA   | 0.92 | 2.54 | 1.75 |
| Mypop   | NA   | NA   | 0.95 | 1.99 | 0    |
| Myrf    | NA   | 1.78 | 2.84 | 0    | NA   |
| Myrfl   | NA   | NA   | 1.72 | 0    | NA   |
| Myrip   | 0.58 | 2.21 | 0.49 | 0    | 0    |
| Mysm1   | NA   | NA   | 0.92 | 0.13 | 0.13 |
| Myst1   | 0.98 | NA   | NA   | NA   | 0    |
| Myst2   | 1.9  | NA   | NA   | NA   | 1.28 |
| Myst3   | 1.59 | NA   | NA   | NA   | 0    |
| Myst4   | 0.38 | NA   | NA   | NA   | 0    |
| Myt1    | 2.04 | 1.54 | 0.69 | 0    | 0    |
| Myt11   | 0.49 | 0.84 | 0.39 | 1.7  | 8.07 |
| Myzap   | NA   | NA   | NA   | 0.62 | NA   |
| Mzb1    | NA   | 0.59 | 2.06 | 1.29 | NA   |
| Mzfl    | NA   | 0    | 1.36 | 1.44 | 3.21 |
| Mzt1    | NA   | NA   | 0.95 | NA   | NA   |
| N4bp1   | NA   | 0.62 | 1.73 | 0.91 | 0    |
| N4bp2   | NA   | NA   | 0    | 0    | 1.7  |
| N4bp211 | NA   | 0.41 | 2.45 | 0    | 1.66 |
| N4bp212 | NA   | 0.39 | 0.39 | 0    | 0    |
| N4bp3   | NA   | 1.5  | 0.99 | 2.03 | NA   |
| N6amt1  | NA   | 0.3  | 0.92 | 0.08 | 0.83 |
| N6amt2  | NA   | NA   | 1.28 | 0.65 | 0.16 |
| Naa10   | NA   | 1.46 | 1.11 | NA   | NA   |
| Naa11   | NA   | 1.16 | 1.6  | 0.99 | NA   |
| Naa15   | NA   | 1.34 | 0.92 | 0.77 | NA   |
| Naa16   | NA   | 0.01 | 1.62 | 1.02 | NA   |
| Naa20   | NA   | NA   | 1.63 | 0    | NA   |

|          |      |      |      |      |      |
|----------|------|------|------|------|------|
| Naa25    | NA   | NA   | 0.76 | 0.67 | NA   |
| Naa30    | NA   | NA   | 1.28 | 0.94 | NA   |
| Naa35    | NA   | 0    | 1.6  | 0    | NA   |
| Naa38    | NA   | 0    | 0.51 | 0.76 | NA   |
| Naa40    | NA   | 0    | 0.4  | 0    | NA   |
| Naa50    | NA   | 1.93 | 1.3  | 0.67 | NA   |
| Naa60    | NA   | 1.67 | 1.08 | 0.81 | NA   |
| Naaa     | NA   | 2.03 | 0.56 | 1.31 | 0    |
| Naalad2  | 0.64 | 0    | 0    | 0.59 | 0    |
| Naaladl1 | NA   | 1.91 | 1.41 | 2.4  | 1.48 |
| Naaladl2 | NA   | NA   | 3.18 | 0.38 | NA   |
| Nab1     | 0    | 0.23 | 3.3  | 1.72 | 0    |
| Nab2     | 0    | 1.21 | 0.12 | 0.02 | 0.57 |
| Nabp1    | NA   | 0    | 2.01 | 0.33 | NA   |
| Nabp2    | NA   | 1.21 | 2.95 | 0    | NA   |
| Naca     | 0.36 | 2.08 | 0.87 | 0    | 0    |
| Nacad    | NA   | 1.08 | 0    | 0.7  | 0    |
| Nacc1    | NA   | NA   | 0.41 | 4.65 | 1.07 |
| Nacc2    | NA   | 1.15 | 0.78 | 1.94 | 0    |
| Nadk     | NA   | 3.01 | 3.11 | 2.54 | 0    |
| Nadk2    | NA   | NA   | 1.26 | 3.56 | NA   |
| Nadsyn1  | NA   | 6.08 | 0.92 | 2.37 | 1.5  |
| Nae1     | NA   | 0.2  | 1.7  | 0    | NA   |
| Naf1     | NA   | NA   | 2.9  | 3.29 | 1.76 |
| Naga     | 0    | 1.13 | 1.64 | 0    | 0    |
| Nagk     | 0    | 0.97 | 1.75 | 0.82 | 0.97 |
| Naglu    | 0    | 0.07 | 0.66 | 0    | 2.26 |
| Nagpa    | 0    | 0.63 | 0.14 | 0.44 | 0    |
| Nags     | 0.52 | NA   | 1.07 | 0.52 | 0    |
| Naif1    | NA   | NA   | 0.88 | 0.64 | 0    |
| Nalcn    | NA   | NA   | 1.79 | 0.31 | NA   |
| Nampt    | NA   | 0.09 | 3.32 | 1.43 | 0    |
| Nanog    | 0.34 | 1.2  | 1.6  | NA   | 4.24 |
| Nanos1   | 6.67 | NA   | 0.42 | 1.19 | 1.62 |
| Nanos2   | 0    | NA   | NA   | 0.89 | NA   |
| Nanos3   | 2.38 | NA   | NA   | 1.35 | NA   |
| Nanp     | NA   | NA   | 3.23 | 0.94 | 0    |
| Nans     | 0.08 | 0    | 0.95 | 1.81 | 2.38 |
| Nap111   | 0.41 | 0    | 0.69 | 0.93 | 0    |
| Nap112   | 0.01 | 3.92 | 3.34 | 1.62 | 0    |
| Nap113   | 1.61 | 1.65 | 0.94 | 1.07 | 0    |



|         |       |      |      |      |      |
|---------|-------|------|------|------|------|
| Nap114  | 0.1   | 1.07 | 1.64 | 0.43 | 2    |
| Nap115  | 0     | NA   | 2.02 | 1.45 | 9.84 |
| Napa    | 1.54  | 0.04 | 0.86 | 7.71 | 1.77 |
| Napb    | 0.57  | NA   | 0.81 | 0.46 | 1.91 |
| Napepld | NA    | NA   | 1.54 | 0.79 | 1.49 |
| Napg    | 0.62  | 0.01 | 0.82 | 0    | 2.3  |
| Naprt1  | NA    | NA   | 1.98 | 1.92 | 1.41 |
| Napsa   | 0.55  | NA   | 0.36 | 2.32 | 0.75 |
| Narf    | NA    | 2.17 | 0.12 | 1.19 | 5.39 |
| Narfl   | 0     | 1.89 | 1.28 | 0.67 | 3.06 |
| Narg1   | 0.12  | NA   | NA   | NA   | NA   |
| Narg2   | 0.55  | 0    | 1.39 | 2.37 | 0    |
| Nars    | 0     | 2.2  | 2.03 | 0.97 | 0    |
| Nars2   | NA    | 1.75 | 1.01 | 0.84 | 1.65 |
| Nasp    | 1.66  | 0.96 | 0.77 | 0.81 | 0    |
| Nat1    | 0     | 1.11 | 0.38 | 0.12 | 0.78 |
| Nat10   | NA    | 0.6  | 1.23 | 2.98 | 2.41 |
| Nat14   | NA    | NA   | 1.9  | 0.52 | 0.78 |
| Nat15   | NA    | NA   | NA   | NA   | 0    |
| Nat2    | 0     | 2.63 | 0.52 | 1.28 | 3.42 |
| Nat5    | 0.34  | NA   | NA   | NA   | NA   |
| Nat6    | 0     | 0    | 0.87 | 0.45 | 1.11 |
| Nat8    | NA    | 0.27 | 0    | 1.34 | 0    |
| Nat8l   | NA    | NA   | 3.3  | 0.31 | 1.22 |
| Nat9    | NA    | 1.45 | 1.46 | 0.3  | 0    |
| Nav1    | 0.87  | NA   | 1.79 | 0    | 0.76 |
| Nav2    | 13.06 | 0.64 | 1.16 | 2.39 | 1.33 |
| Nav3    | NA    | 0.63 | 0.72 | 2.51 | 0    |
| Nbas    | NA    | 1.83 | 0.17 | 0    | 0.9  |
| Nbea    | 0.34  | 0    | 0.67 | 1.32 | 0.41 |
| Nbeal1  | NA    | NA   | 0.71 | 0.58 | NA   |
| Nbeal2  | NA    | 1.75 | 1.68 | 1.23 | 0    |
| Nbl1    | 0.7   | 0.26 | 1.66 | 2.08 | 0    |
| Nbn     | 0.54  | 0    | 2.91 | 1.56 | 0    |
| Nbr1    | 0.69  | 0.94 | 0.86 | 3.19 | 6.98 |
| Ncald   | 0     | 0    | 0.13 | 1.19 | 0    |
| Ncam1   | 0     | 0.49 | 0.66 | 1.03 | 0    |
| Ncam2   | 0.62  | 2.57 | 1.09 | 0.46 | 0.84 |
| Ncan    | NA    | 0.69 | 0.58 | 2.22 | 3.85 |
| Ncapd2  | NA    | 0    | 5.17 | 0    | 0    |
| Ncapd3  | NA    | 0    | 1.64 | 0.11 | 1.77 |

|            |      |      |      |      |      |
|------------|------|------|------|------|------|
| Ncapg      | NA   | 0.15 | 1.29 | NA   | 1.51 |
| Ncapg2     | NA   | 0.17 | 2.91 | 1.24 | 2.51 |
| Ncaph      | NA   | 0.2  | 3.55 | 0.33 | 0    |
| Ncaph2     | NA   | 0.17 | 1.5  | 1.22 | 1.15 |
| Ncbp1      | NA   | 1.12 | 1.58 | 0.09 | 0.84 |
| Ncbp2      | 0.11 | 0.86 | 2.35 | 0.83 | 0    |
| Nccrp1     | NA   | NA   | NA   | 0.86 | NA   |
| Ncdn       | 0.82 | 0.85 | 2.44 | 1.65 | 1.42 |
| Nceh1      | NA   | NA   | 0.88 | 0.99 | 0    |
| Ncf1       | 4.16 | NA   | NA   | NA   | NA   |
| Ncf2       | 0.14 | 0.92 | 1.29 | 0    | 1.52 |
| Ncf4       | 0.96 | 0.16 | 2.76 | 0.66 | 0    |
| Nck1       | 0.68 | 0.75 | 2.07 | 0.78 | 4.05 |
| Nck2       | NA   | 0    | 0.66 | 0.38 | 0    |
| Nckap1     | 0.21 | 1.98 | 1.92 | 2.5  | 0.26 |
| Nckap11    | NA   | 1.72 | 0.07 | 1.8  | 3.89 |
| Nckap5     | NA   | NA   | 0    | 0.69 | 0    |
| Nckap51    | NA   | NA   | 0.23 | 0    | 1.49 |
| Nckipsd    | 0.75 | 0.53 | 2.39 | 0    | 2.23 |
| Ncl        | 0    | 1.75 | 0.96 | 1.93 | 2.06 |
| Ncln       | NA   | 1.67 | 1.78 | 0    | 0.8  |
| Nemap      | NA   | NA   | NA   | 0    | NA   |
| Ncoa1      | 0.33 | 0.25 | 0.92 | 2.03 | 0.48 |
| Ncoa2      | 0.89 | 0.71 | 0.68 | 3    | 0    |
| Ncoa3      | 0.18 | 1    | 2.03 | 3.16 | 0.9  |
| Ncoa4      | 0.84 | NA   | NA   | 2.88 | NA   |
| Ncoa5      | 0.57 | NA   | 0.24 | 0.18 | 0    |
| Ncoa6      | 0.3  | 0.94 | 0.63 | 1.7  | 3.42 |
| Ncoa7      | NA   | NA   | 0.26 | 2.69 | 1.25 |
| Ncor1      | 0.83 | 0    | 0.52 | 1.74 | 0.57 |
| Ncor2      | 0    | 0.08 | 1.05 | 0.79 | 1.18 |
| Ncr1       | 3.32 | 1.36 | 1.8  | 5.85 | 0    |
| Ncrna00081 | NA   | NA   | NA   | NA   | 0.56 |
| Ncrna00085 | NA   | NA   | NA   | NA   | 0    |
| Ncrna00086 | NA   | NA   | NA   | NA   | 1.71 |
| Ncs1       | NA   | 1.12 | 0.29 | 3.1  | NA   |
| Ncstn      | 0.72 | 0.76 | 1.04 | 0    | 0    |
| Ndc80      | NA   | 1.65 | 1.76 | 0    | 3.8  |
| Nde1       | 0.52 | 1.45 | 1.28 | 0.74 | 0.76 |
| Ndel1      | 0.07 | 0.99 | 0.75 | 0    | 0    |
| Ndfip1     | 0    | 0.06 | 2.49 | 2.17 | NA   |

|          |      |      |      |      |      |
|----------|------|------|------|------|------|
| Ndfip2   | 0.71 | NA   | 1.34 | 0.81 | 0.04 |
| Ndn      | 1.44 | 0.18 | 2.28 | 2.6  | 1.22 |
| Ndnf     | NA   | 0.81 | 0.74 | 0.44 | NA   |
| Ndnl2    | 0.78 | NA   | 0.28 | 1.94 | 0    |
| Ndor1    | 7.52 | 2.2  | 0    | 3.71 | 2.27 |
| Ndp      | NA   | 1.25 | 0.38 | 1.04 | 0    |
| Ndrg1    | 0.99 | 0.9  | 0.14 | 4.24 | 1.71 |
| Ndrg2    | 3.4  | 0    | 0    | 2.41 | 0.19 |
| Ndrg3    | 0.1  | 0    | 1.83 | 1.37 | 2.64 |
| Ndrg4    | 0.54 | 2.07 | 2.29 | 0    | 1.33 |
| Ndst1    | 0.01 | 1.07 | 0.88 | 1.52 | 2.07 |
| Ndst2    | 0.8  | 0    | 0.6  | 5.85 | 0    |
| Ndst3    | 0.55 | 1.52 | 0.57 | 1.97 | 0    |
| Ndst4    | 0.79 | 0.89 | 0.08 | 13.9 | 2.22 |
| Ndufa1   | 0    | 1.69 | 1.56 | NA   | 1.7  |
| Ndufa10  | NA   | 0    | 0.84 | 1.43 | NA   |
| Ndufa11  | 0.2  | NA   | 0.41 | 0.92 | 0    |
| Ndufa12  | NA   | NA   | 2.17 | 5.89 | 0    |
| Ndufa13  | NA   | 1.08 | 0.68 | NA   | 0    |
| Ndufa2   | 0.59 | 1.3  | 1.33 | 0.12 | 3.06 |
| Ndufa3   | 0.86 | 1.25 | 0    | 0    | 0    |
| Ndufa4   | 0.11 | 2.87 | 3.03 | 0.12 | 0    |
| Ndufa4l2 | NA   | 0.36 | 1.15 | 0.41 | 0    |
| Ndufa5   | 0.26 | 1.58 | 1.51 | 0.72 | 0    |
| Ndufa6   | 0.03 | 5.01 | 2.99 | 1.7  | 0    |
| Ndufa7   | 0.4  | 0.86 | 0    | 0    | 0    |
| Ndufa8   | 0.5  | 0    | 1.14 | 2.85 | 0    |
| Ndufa9   | 0.35 | 0.11 | 0.46 | 0    | 0    |
| Ndufab1  | 0    | 1.71 | 1.07 | 1.07 | 0    |
| Ndufaf1  | 0    | 5.33 | 0    | 1.25 | 0    |
| Ndufaf2  | NA   | NA   | 2.46 | 0.95 | 3.42 |
| Ndufaf3  | NA   | 2.6  | 1.52 | 0.74 | 3.07 |
| Ndufaf4  | NA   | 1.15 | 2.65 | 3.01 | 0    |
| Ndufaf5  | NA   | 1.98 | 2.65 | 1.34 | NA   |
| Ndufaf6  | NA   | NA   | 2.47 | 2.05 | NA   |
| Ndufaf7  | NA   | 0.33 | 2.6  | 2.34 | NA   |
| Ndufb10  | 0.14 | NA   | 1.99 | 0    | 0    |
| Ndufb11  | NA   | 1.04 | 1.18 | 0    | 0    |
| Ndufb2   | 0    | 0    | 1.14 | 0    | 0    |
| Ndufb3   | 1.16 | 0    | 1.16 | 0    | 0    |
| Ndufb4   | NA   | 3.1  | 2.39 | 0    | 0    |

|        |      |      |      |       |      |
|--------|------|------|------|-------|------|
| Ndufb5 | 0.26 | 0    | 1.29 | 0     | 0    |
| Ndufb6 | NA   | 0    | 0.44 | 0.95  | 0.96 |
| Ndufb7 | 0    | 0    | 0.06 | 0     | 1.75 |
| Ndufb8 | 0.34 | 1.47 | 1.12 | 0     | 0    |
| Ndufb9 | 0    | NA   | 2.41 | 0     | 0    |
| Ndufc1 | 0.78 | 0.19 | 1.37 | 10.75 | 0.18 |
| Ndufc2 | 2.1  | 0    | 1.91 | 1.64  | 0.69 |
| Ndufs1 | 7.45 | 1.37 | 0.35 | 0     | 2.33 |
| Ndufs2 | 0.07 | 1.8  | 1.85 | 1.98  | 0    |
| Ndufs3 | 0.14 | 0    | 1.51 | 1.93  | 0    |
| Ndufs4 | 0.15 | 0    | 1.33 | 1.09  | 1.67 |
| Ndufs5 | 0.44 | NA   | NA   | NA    | 0    |
| Ndufs6 | NA   | 0    | 1.33 | 0.03  | 0    |
| Ndufs7 | 0.85 | 1.25 | 4.5  | 3.81  | 0.71 |
| Ndufs8 | 0.32 | 0.98 | 0.24 | 0.1   | 0    |
| Ndufv1 | 0.27 | 1.31 | 0.41 | 0.65  | 0    |
| Ndufv2 | 0    | 0    | 2.32 | 1.98  | 3    |
| Ndufv3 | NA   | NA   | 0.56 | 4.28  | 0    |
| Neat1  | NA   | 0.05 | 3.19 | NA    | 0.82 |
| Neb    | 0.96 | 0.68 | 2.24 | 0     | 0    |
| Nebi   | 0.73 | 0.68 | 0.1  | 1.25  | 1.02 |
| Necab1 | NA   | NA   | 1.68 | 0.46  | 0.94 |
| Necab2 | NA   | 1.06 | 2.19 | 1.53  | 7.6  |
| Necab3 | NA   | 0.17 | 0.03 | 1.96  | 0    |
| Necap1 | NA   | 0.82 | 1.76 | 0.39  | 2.1  |
| Necap2 | NA   | 0.53 | 1.63 | 0.07  | 0.88 |
| Nedd1  | 0.83 | NA   | 0.65 | 0.57  | 2.37 |
| Nedd4  | 1.27 | 1.99 | 0.48 | 2.02  | 0.22 |
| Nedd4l | 0.43 | 0.75 | 1.47 | 1.27  | 0    |
| Nedd8  | 0    | 1.43 | 2.17 | 0     | 0    |
| Nedd9  | 0.46 | 1.68 | 1.77 | 1.18  | 0    |
| Nefh   | 0    | 0.08 | 2.91 | 3.07  | 0    |
| Nefl   | 0.65 | 0.03 | 0.64 | NA    | 0    |
| Nefm   | NA   | 1.45 | 0.35 | 0.64  | 0    |
| Negr1  | 0.74 | NA   | 0    | 0.96  | 0    |
| Neil1  | 1.03 | 1.76 | 1.82 | 0.13  | 2.49 |
| Neil2  | 3.39 | NA   | NA   | 0.58  | NA   |
| Neil3  | NA   | 0    | 1.71 | 0.73  | 0    |
| Nek1   | 0.47 | 0.93 | 0.19 | 1.77  | 0.53 |
| Nek10  | NA   | NA   | NA   | 0     | NA   |
| Nek11  | 1.2  | 2.5  | 0.44 | 0.96  | 0.41 |

|         |      |      |      |      |      |
|---------|------|------|------|------|------|
| Nek2    | 0    | 0.31 | 1.55 | 0.27 | 2.06 |
| Nek3    | 0    | 0.4  | 1.03 | 0.62 | 2.68 |
| Nek4    | 0    | 0.15 | 0.93 | 0.08 | 0    |
| Nek5    | NA   | NA   | NA   | 0    | NA   |
| Nek6    | 0.49 | NA   | 0.22 | 4.06 | 0.11 |
| Nek7    | 1.2  | 1.54 | 1.2  | 0.74 | 3.66 |
| Nek8    | 0    | NA   | 2    | 0.9  | NA   |
| Nek9    | 6.9  | 1.67 | 0.22 | 0    | 0    |
| Nelf    | 0.91 | NA   | NA   | NA   | 0    |
| Nelfa   | NA   | 0    | 2.29 | NA   | NA   |
| Nelfb   | NA   | 0    | 2.74 | 0    | NA   |
| Nelfcd  | NA   | 0    | 1.15 | 0.66 | NA   |
| Nelfe   | NA   | 2.31 | 3.53 | 0.98 | NA   |
| Nell1   | NA   | 1.26 | 0.91 | 1.04 | 1.44 |
| Nell2   | 0    | 0    | 1.15 | 0    | 0    |
| Nemf    | NA   | 0.56 | 1.22 | 0    | NA   |
| Nenf    | NA   | 1.14 | 3.12 | 0    | 0    |
| Neo1    | 0.73 | 1.91 | 1.15 | 1.88 | 0    |
| Nes     | 0    | 1.24 | 5.2  | 2.24 | 0    |
| Net1    | 0    | 0    | 1.05 | 0.68 | 3.55 |
| Neto1   | 0.32 | NA   | 1.15 | 2.4  | NA   |
| Neto2   | 0    | 0    | 0    | 0.06 | 0.09 |
| Neu1    | 0    | 0    | 1.37 | 1.51 | 0.01 |
| Neu2    | 2.45 | 0.01 | 1.95 | 0.07 | 2.72 |
| Neu3    | 0.02 | 0.2  | 1.14 | 1.48 | 2.13 |
| Neu4    | 1.19 | NA   | NA   | 0.51 | NA   |
| Neurl   | 2.45 | NA   | NA   | NA   | NA   |
| Neurl1b | NA   | NA   | 3.13 | NA   | 0    |
| Neurl2  | NA   | NA   | 3.6  | 2.11 | 0    |
| Neurl3  | NA   | NA   | 0.12 | 1.23 | 0.63 |
| Neurl4  | NA   | NA   | 2.27 | 0.74 | 0.01 |
| Neurod1 | 0.9  | 0.74 | 1.34 | 0.03 | 1.45 |
| Neurod2 | 1.83 | 1.33 | 0.98 | 3.08 | 0    |
| Neurod4 | 0    | 0.45 | 0.05 | 0.24 | 2.57 |
| Neurod6 | 0.09 | 1.39 | 1.69 | 1.24 | 0    |
| Neurog1 | 1.31 | 1.74 | 0.72 | 1.21 | 0    |
| Neurog2 | 0    | 2.2  | 2.05 | 0.9  | 0    |
| Neurog3 | 0.62 | 0.85 | 0.78 | 2.7  | 1.68 |
| Nexn    | 0.62 | NA   | 0    | 0.24 | 1.09 |
| Nf1     | 0.44 | 0    | 1.29 | 1.77 | 0    |
| Nf2     | 0.36 | 0.63 | 1.03 | 2.02 | 0    |

|          |      |      |      |      |      |
|----------|------|------|------|------|------|
| Nfam1    | NA   | NA   | 1.9  | 2.79 | 0    |
| Nfasc    | 0.25 | 0    | 0.94 | 0.52 | 1.53 |
| Nfat5    | 0.24 | 2.03 | 0    | 2.36 | 0.24 |
| Nfatc1   | 0.51 | 0.05 | 1.5  | 0.67 | 0    |
| Nfatc2   | 0.74 | NA   | 0.71 | 0.96 | 0.43 |
| Nfatc2ip | 0.38 | 0    | 0.53 | 1.43 | 0    |
| Nfatc3   | 0    | 0    | 1.05 | 1.02 | 0    |
| Nfatc4   | 1.28 | 1.2  | 0    | 0.14 | 0    |
| Nfe2     | 2.71 | 2.46 | 4.43 | 1.91 | 0    |
| Nfe2l1   | 0.93 | 1.03 | 3.04 | 0    | 3.26 |
| Nfe2l2   | 0.87 | 0.31 | 1.25 | 0.67 | 0    |
| Nfe2l3   | 3.27 | 1.3  | 0.11 | 1.23 | 1.24 |
| Nfia     | 0    | NA   | 1.1  | 0.25 | 0.67 |
| Nfib     | 0.5  | 0.67 | 0.01 | 0.38 | 1.26 |
| Nfic     | 0.41 | 0.02 | 1.94 | 1.54 | 0    |
| Nfil3    | 0.06 | 0.13 | 0.67 | 0.4  | NA   |
| Nfix     | 0.39 | 1.51 | 1.15 | 0.47 | 1.16 |
| Nfkb1    | 0    | 1.41 | 1.46 | 8.66 | 0    |
| Nfkb2    | 0.1  | 0.63 | 0.9  | 1.71 | 0    |
| Nfkbia   | 0    | 0.56 | 1.26 | 1.61 | 0    |
| Nfkbib   | 0.93 | 0.78 | 0.4  | 1.19 | 0    |
| Nfkbid   | NA   | NA   | 0.53 | 4.44 | 0    |
| Nfkbie   | 0.32 | 1.59 | 2.09 | 0.97 | 0    |
| Nfkbi1   | 0.93 | 0.64 | 1.81 | 1.96 | 0    |
| Nfkbi2   | NA   | NA   | NA   | NA   | 4.23 |
| Nfkbiz   | 0.25 | NA   | 0.69 | 1.25 | 0    |
| Nfirkb   | 0.76 | 0    | 0.74 | 1.86 | 1.28 |
| Nfs1     | 0.13 | 0    | 0.81 | 0    | 0    |
| Nfu1     | NA   | 0.03 | 0.75 | 4.2  | 2.24 |
| Nfx1     | 0.46 | 0    | 0.58 | 2.77 | 0    |
| Nfxl1    | NA   | NA   | 3.6  | 0.24 | 1.61 |
| Nfya     | 1.46 | 0.59 | 0.77 | 0    | 0    |
| Nfyb     | 0.57 | 0.78 | 1.84 | 0.13 | 2.78 |
| Nfyc     | 0    | 1.24 | 0.17 | 0.67 | 1.39 |
| Ngb      | 3.18 | 1.37 | 0.5  | 0.48 | 0.63 |
| Ngdn     | NA   | 1.21 | 0.92 | 1.8  | 1.38 |
| Ngef     | 1.93 | NA   | 1.33 | 3.35 | 3.54 |
| Ngf      | NA   | 1.73 | 0.46 | 0    | 1.6  |
| Ngfb     | 0    | NA   | NA   | NA   | NA   |
| Ngfr     | 0.09 | 2.21 | 0.77 | 1.93 | 0    |
| Ngfrap1  | 0.88 | 1.32 | 1.93 | 0.26 | 1.86 |

|           |      |      |      |      |      |
|-----------|------|------|------|------|------|
| Ngly1     | 0    | 2.15 | 2.62 | 0.13 | 4.16 |
| Ngrn      | NA   | 2.24 | 1.7  | 1.26 | 0    |
| Nhedc2    | NA   | NA   | NA   | NA   | 1.63 |
| Nhej1     | NA   | 0    | 0.7  | 0    | 0.05 |
| Nhlh1     | 1.37 | 0    | 0.64 | 0    | 0    |
| Nhlh2     | 2.32 | 0.55 | 1.3  | 2.81 | 0    |
| Nhlrc1    | 2.01 | NA   | NA   | 0.58 | NA   |
| Nhlrc2    | 0.38 | 0    | 0.95 | 0.92 | 0.86 |
| Nhlrc3    | NA   | NA   | 1    | 0.58 | 0.05 |
| Nhlrc4    | NA   | NA   | NA   | 1.75 | NA   |
| Nhp2      | NA   | 2.68 | 1.15 | 0.75 | 2.37 |
| Nhp211    | NA   | 2.16 | 0.54 | 1.52 | 0    |
| Nhs       | NA   | NA   | NA   | 2.04 | NA   |
| Nhs11     | NA   | NA   | 0.49 | 1.54 | 0    |
| Nhs12     | NA   | NA   | 2.4  | NA   | NA   |
| Nicn1     | 0    | NA   | 2.22 | 0.84 | 0    |
| Nid1      | 0.4  | 0.06 | 1.57 | 1.25 | 0    |
| Nid2      | 0.57 | 0    | 6.36 | NA   | 0.18 |
| Nif311    | 0    | 1.75 | 1.97 | NA   | 3.46 |
| Nim1      | NA   | NA   | NA   | 0.34 | NA   |
| Nin       | 1    | 0.3  | 2.56 | 0    | 0    |
| Ninj1     | 0    | 1.01 | 1.09 | 1.55 | 0    |
| Ninj2     | 0    | 0.55 | 1.85 | 0.05 | NA   |
| Ninl      | NA   | 0    | 3.47 | 0.61 | 1.01 |
| Nip7      | NA   | 1.39 | 1.88 | 1.65 | 2.61 |
| Nipa1     | 0    | NA   | 2.83 | NA   | 0    |
| Nipa2     | NA   | 1.6  | 4.21 | 0.86 | 0    |
| Nipal1    | NA   | NA   | 0.17 | 0.13 | 0    |
| Nipal2    | NA   | 0.94 | 0.1  | 1.02 | 0    |
| Nipal3    | NA   | 0    | 2.23 | 0    | 0    |
| Nipal4    | NA   | NA   | 1.78 | 0.35 | 1.05 |
| Nipbl     | NA   | 0.63 | 0.76 | 1.23 | 0    |
| Nipsnap1  | 1.25 | 0    | 3.23 | 0.66 | 1.07 |
| Nipsnap3a | NA   | NA   | 1.36 | 2.72 | 0    |
| Nipsnap3b | 0.61 | 1.82 | 1.9  | 0.59 | 3.26 |
| Nisch     | 0.04 | 0.6  | 3.63 | 1.66 | 2.27 |
| Nit1      | 0.46 | 2.49 | 1.54 | 0.14 | 0.57 |
| Nit2      | 0.15 | 0    | 1.52 | 1.19 | 8.12 |
| Nkain1    | NA   | 0    | 0.75 | 3.26 | 1.65 |
| Nkain2    | NA   | NA   | 0    | 1.48 | 0.22 |
| Nkain3    | NA   | NA   | NA   | 1.98 | NA   |

|         |      |      |      |      |      |
|---------|------|------|------|------|------|
| Nkain4  | NA   | NA   | 3.03 | 1.25 | 0    |
| Nkap    | NA   | NA   | 0    | 0.95 | 1.81 |
| Nkapl   | NA   | NA   | 0.22 | 1.16 | 2.01 |
| Nkd1    | 0.44 | NA   | 0.06 | 2.11 | NA   |
| Nkd2    | 0.8  | NA   | 0.72 | 0.58 | 0    |
| Nkg7    | 0    | 1.1  | 1.1  | 3.37 | 2.81 |
| Nkiras1 | 0    | NA   | 1.46 | 0    | 0    |
| Nkiras2 | 0.89 | 1.72 | 1.03 | NA   | 0.53 |
| Nkpd1   | 0.23 | NA   | 0.92 | 1.65 | NA   |
| Nkrf    | NA   | 0.94 | 3.91 | 2.38 | 0    |
| Nktr    | 0.29 | 1.17 | 0.42 | 0    | 2.04 |
| Nkx1-2  | 1.52 | NA   | NA   | 0.79 | NA   |
| Nkx2-1  | NA   | 0.64 | 1.05 | 2.82 | 0    |
| Nkx2-2  | 0    | 2.8  | 2.81 | 0.65 | 2.83 |
| Nkx2-3  | 0.08 | NA   | 0.99 | 0.93 | NA   |
| Nkx2-4  | NA   | NA   | NA   | 0.44 | NA   |
| Nkx2-5  | 4.84 | 1.79 | 0.16 | 1.06 | 0    |
| Nkx2-6  | 2.16 | NA   | NA   | 0.38 | NA   |
| Nkx3-1  | 3.49 | 1.77 | 3.2  | 1.05 | 1.03 |
| Nkx3-2  | NA   | 1.49 | 0.26 | 1.56 | 0    |
| Nkx6-1  | 1.15 | 2.53 | 2.41 | 1.89 | NA   |
| Nkx6-2  | 0.67 | NA   | 0.11 | NA   | 0.01 |
| Nkx6-3  | NA   | NA   | 1.65 | 2.48 | NA   |
| Nle1    | NA   | 0.96 | 0    | 3.42 | 0    |
| Nlgn1   | 0.08 | 1.12 | 2.1  | 0.87 | 0.13 |
| Nlgn2   | 0.35 | NA   | 1.49 | 1.14 | 4.77 |
| Nlgn3   | 0    | 1.22 | 1.18 | 1.12 | NA   |
| Nlk     | 0    | 1.13 | 2.15 | 4.02 | 0.85 |
| Nln     | 0    | NA   | 0.88 | 0    | 0    |
| Nlrc3   | NA   | NA   | 1.57 | 1.15 | 2.73 |
| Nlrc4   | NA   | NA   | NA   | 1.9  | NA   |
| Nlrc5   | NA   | NA   | 0    | 0.62 | 1.83 |
| Nlrp10  | NA   | NA   | 0    | 2.86 | NA   |
| Nlrp12  | NA   | NA   | 1.5  | NA   | 0    |
| Nlrp14  | NA   | NA   | 2.88 | 2.11 | NA   |
| Nlrp2   | NA   | NA   | NA   | 0.86 | NA   |
| Nlrp3   | NA   | 0.55 | 0.76 | 2.79 | 0    |
| Nlrp5   | NA   | NA   | 1.57 | 1.34 | NA   |
| Nlrp6   | NA   | NA   | 0.48 | 1.02 | NA   |
| Nlrx1   | NA   | 0.33 | 2.61 | 0    | 0    |
| Nmb     | 1.38 | 0.48 | 2.01 | 3.52 | 0    |



|        |      |      |      |      |      |
|--------|------|------|------|------|------|
| Nmbr   | 2.09 | 2.9  | 0.11 | 0.91 | 2.72 |
| Nmd3   | NA   | 0.64 | 0.87 | 0.94 | 1.33 |
| Nme1   | 0.29 | 0.27 | 0.25 | NA   | NA   |
| Nme2   | 0.53 | NA   | NA   | NA   | NA   |
| Nme3   | 1.1  | 2.63 | 1.51 | 2.75 | 0    |
| Nme4   | 0.62 | 1.3  | 2.52 | 0    | 2.1  |
| Nme5   | 0    | 1.87 | 7.72 | 0    | 0    |
| Nme6   | 0    | 1.67 | 2.17 | 1.53 | 1.42 |
| Nme7   | 0.47 | 0.46 | 1.33 | 0.8  | 0.67 |
| Nme8   | NA   | 2.74 | 0    | 7.64 | NA   |
| Nme9   | NA   | NA   | NA   | 0    | NA   |
| Nmi    | 0.16 | 0    | 0.86 | 1.58 | 0.35 |
| Nmnat1 | NA   | NA   | 1.19 | 0.59 | 2.57 |
| Nmnat2 | NA   | 0    | 1    | 5.13 | 7.79 |
| Nmnat3 | NA   | NA   | 1.55 | 3.22 | 0    |
| Nmral1 | NA   | NA   | 1.02 | 0.94 | 2.9  |
| Nmrk1  | NA   | 0.81 | 1.06 | 0    | NA   |
| Nmrk2  | NA   | 1.9  | 0.5  | 0    | NA   |
| Nms    | NA   | NA   | NA   | 2.13 | NA   |
| Nmt1   | 1.08 | 0    | 0.34 | 0.03 | 0    |
| Nmt2   | 0    | 0    | 0.5  | 0.88 | 1.43 |
| Nmu    | 1.25 | 1.71 | 0.78 | 1.42 | 3.43 |
| Nmur1  | NA   | 0.98 | 2.94 | 1.2  | 3.49 |
| Nmur2  | 0.7  | NA   | 2.26 | 1.59 | 2.98 |
| Nnat   | 0.21 | 0.7  | 0.38 | 1.53 | 0    |
| Nnmt   | 0    | 1.04 | 0.47 | 1.88 | 1.45 |
| Nnt    | 0.08 | 0    | 2.13 | 0    | 0    |
| Noa1   | NA   | NA   | 2.63 | 2.08 | NA   |
| Nob1   | NA   | NA   | 1.25 | 1.64 | 4.3  |
| Nobox  | NA   | NA   | 0    | 0.15 | 0.03 |
| Noc2l  | NA   | 1.4  | 0.28 | 2.34 | 0.6  |
| Noc3l  | NA   | 1.42 | 2.81 | 1.07 | 3.16 |
| Noc4l  | NA   | 1.54 | 2.06 | 2.5  | 1.01 |
| Nod1   | NA   | 2.21 | 3.6  | 1.58 | 4.16 |
| Nod2   | NA   | NA   | NA   | 4.76 | NA   |
| Nodal  | 0.14 | 1.35 | 0.15 | 1.88 | 2.03 |
| Nog    | 2.85 | NA   | 2.97 | 0.67 | 5.4  |
| Nol1   | 0.92 | NA   | NA   | NA   | NA   |
| Nol10  | NA   | 1.49 | 0.49 | 1.12 | 0.87 |
| Nol11  | NA   | 1.61 | 0.66 | 0.62 | 2.54 |
| Nol12  | NA   | 0.07 | 3.19 | 1.76 | 1.61 |

|         |      |      |      |      |      |
|---------|------|------|------|------|------|
| Nol3    | 0.21 | 2.54 | 1.14 | NA   | 0    |
| Nol4    | 1.25 | 1.36 | 0.13 | 1.92 | 1.65 |
| Nol5a   | 0.27 | NA   | NA   | NA   | NA   |
| Nol6    | 0    | 1.12 | 0.75 | 1.81 | 0.98 |
| Nol7    | 0.42 | 0.76 | 3.11 | 0.83 | 1.56 |
| Nol8    | 0    | 0    | 0.82 | 1.67 | 2.27 |
| Nol9    | NA   | 0    | 0.72 | 3.76 | 0    |
| Nola1   | 0.23 | NA   | NA   | NA   | NA   |
| Nola2   | 0.3  | NA   | NA   | NA   | NA   |
| Nola3   | 0    | NA   | NA   | NA   | NA   |
| Nolc1   | 0.54 | 0.72 | 1.98 | 1.39 | 1.89 |
| Nom1    | NA   | NA   | NA   | 1.44 | NA   |
| Nono    | 0.77 | 0    | 0    | 0.48 | 0    |
| Nop10   | NA   | 0    | 2.2  | 0.21 | 2.5  |
| Nop14   | NA   | 2.7  | 0.54 | 1.36 | 0    |
| Nop16   | NA   | 0.97 | 1.34 | 1.75 | 0    |
| Nop2    | NA   | 2.16 | 0.6  | 1.13 | 1.91 |
| Nop56   | NA   | 0.85 | 0.52 | NA   | 1.29 |
| Nop58   | NA   | NA   | 2.02 | 0.99 | 2.58 |
| Nop9    | NA   | NA   | 0    | 0    | NA   |
| Nope    | 0.53 | NA   | NA   | NA   | NA   |
| Nos1    | 3.58 | 0.73 | 0.57 | 1.66 | 1.12 |
| Nos1ap  | NA   | 0    | 0.91 | 0.03 | 0    |
| Nos2    | NA   | 1.67 | 0.39 | 1.75 | 0    |
| Nos3    | 0.65 | 1.6  | 0.01 | 1.6  | 0    |
| Nosip   | 0.71 | 0    | 0.69 | 0    | 0    |
| Nostrin | NA   | NA   | 0.96 | 1.37 | 3.03 |
| Notch1  | 0.93 | 2.15 | 1.15 | 0    | 1.42 |
| Notch2  | 0    | 1    | 1.33 | 0    | 0    |
| Notch3  | 1.17 | 1.25 | 0    | 2.5  | 1.21 |
| Notch4  | 0.41 | 0.16 | 0.98 | NA   | 1.34 |
| Notum   | NA   | NA   | 3.15 | 0.64 | 0    |
| Nov     | 0.81 | 1.71 | 1.22 | 4.33 | 0.72 |
| Nova1   | 0.22 | 0.64 | 0.6  | 3.91 | 2.04 |
| Nova2   | NA   | 0.48 | 0.67 | 0.05 | 0    |
| Nox1    | 0    | NA   | NA   | 1.81 | NA   |
| Nox3    | 0.52 | NA   | NA   | 2.4  | NA   |
| Nox4    | 0.11 | 2.07 | 1.06 | 0.75 | 1.16 |
| Noxa1   | 0    | NA   | NA   | NA   | NA   |
| Noxo1   | 1.78 | NA   | 2.66 | 2.04 | 4.01 |
| Noxred1 | NA   | NA   | 0    | 0.17 | NA   |

|        |      |      |      |      |      |
|--------|------|------|------|------|------|
| Npas1  | 1.61 | 3.03 | 3.75 | 0.79 | 0    |
| Npas2  | 0.55 | 0.61 | 3    | 1.61 | 0    |
| Npas3  | 0.49 | 0.93 | 0    | 0.62 | 1.13 |
| Npas4  | NA   | NA   | 1.46 | 0.78 | 0.07 |
| Npat   | 0.19 | 0    | 1.67 | 0    | 0    |
| Npb    | 0.89 | NA   | 3.56 | 0.88 | 7.53 |
| Npbwr1 | NA   | NA   | NA   | 0.54 | NA   |
| Npc1   | 0.07 | 0    | 0.93 | 0    | 0    |
| Npc1l1 | 1.29 | 0.89 | 0    | 0.95 | 1.94 |
| Npc2   | 0.57 | 0.06 | 0.79 | 0.02 | 0    |
| Npdc1  | 1.85 | 1.33 | 2.08 | 1.14 | 5.69 |
| Npepl1 | 0.16 | 2.13 | 0.67 | 0.57 | 0    |
| Npepps | 0    | 0.19 | 1.49 | 0    | 0.89 |
| Npff   | 0.77 | 4.31 | 1.77 | 0.4  | 2.41 |
| Npffr1 | NA   | NA   | NA   | 1.24 | NA   |
| Npffr2 | NA   | NA   | 1.63 | 1.3  | 4.74 |
| Nphp1  | 0.52 | 1.18 | 2.75 | 0.94 | 1.07 |
| Nphp3  | 0.79 | NA   | 1.5  | NA   | 0    |
| Nphp4  | 1.33 | 0.25 | 2.23 | 0.8  | 0.92 |
| Nphs1  | 3.31 | 3.64 | 1.4  | 1.2  | 7.58 |
| Nphs2  | 0.37 | 0.87 | 0.02 | 1.41 | 1.48 |
| Npl    | 1.82 | 1.33 | 2.14 | 0.14 | 1.96 |
| Nploc4 | NA   | 2.33 | 3.18 | 0    | 1.61 |
| Npm1   | NA   | 1.74 | 3.42 | 0    | 3.4  |
| Npm2   | 1.57 | NA   | NA   | 2.57 | NA   |
| Npm3   | 1.97 | NA   | NA   | NA   | NA   |
| Npnt   | 0.92 | NA   | 0.37 | 0    | 1.05 |
| Nppa   | NA   | 0.73 | 1.17 | 2.48 | 0    |
| Nppb   | 4.32 | 0.03 | 5.08 | 2.13 | 0    |
| Nppc   | 2.78 | 3.27 | 0.79 | 1.56 | 3.6  |
| Npr1   | 0.58 | 2.28 | 1.44 | 1.06 | 3.81 |
| Npr2   | 0.1  | 0    | 1.38 | 1.42 | 1.91 |
| Npr3   | 1.15 | 0.74 | 0.42 | 0.46 | 0    |
| Nprl2  | NA   | 0.09 | 0.15 | 3.35 | NA   |
| Nprl3  | NA   | 0    | 0.29 | 0    | NA   |
| Npsr1  | NA   | NA   | NA   | 1.28 | NA   |
| Nptn   | NA   | 0.19 | 1.79 | 0.93 | 0    |
| Nptx1  | 0.33 | 0.02 | 3.18 | 2.3  | 0    |
| Nptx2  | 2.52 | 0.67 | 0.87 | 2.06 | 5.42 |
| Nptxr  | 0    | NA   | NA   | NA   | NA   |
| Npvf   | NA   | 1.98 | 2.09 | 1.57 | 0.56 |

|         |      |      |      |      |      |
|---------|------|------|------|------|------|
| Npw     | NA   | NA   | NA   | 2.23 | NA   |
| Npy     | 0.69 | 1.02 | 1.79 | 0.77 | 0    |
| Npy1r   | 0.4  | 0.37 | 0.81 | 1.02 | 2.27 |
| Npy2r   | NA   | 1.44 | 1.54 | 0.36 | 0    |
| Npy4r   | NA   | 1.61 | 0    | 0.58 | NA   |
| Npy5r   | 1.43 | 1.44 | 0.48 | 1.52 | 1.72 |
| Npy6r   | NA   | 2.2  | 1.62 | 0    | 2.25 |
| Nqo1    | 0.29 | 1.6  | 0.41 | 2.67 | 0    |
| Nqo2    | 1.95 | 4.62 | 3.54 | 0    | 1.4  |
| Nr0b1   | 0.24 | 0.8  | 0    | 0.7  | 0    |
| Nr0b2   | 0.51 | 2    | 1.12 | 0.97 | 1.89 |
| Nr1d1   | 2.01 | 0    | 1.16 | 0.64 | NA   |
| Nr1d2   | 0.04 | 0    | 1.45 | 1    | 0    |
| Nr1h2   | 0.28 | 1.77 | 0.02 | 2    | 0    |
| Nr1h3   | 0.12 | 0.05 | 1.8  | 1.37 | 0    |
| Nr1h4   | 0.08 | 2.46 | 0.48 | 0    | 2.19 |
| Nr1i2   | 0.49 | 1.52 | 0.41 | 0.45 | 2.29 |
| Nr1i3   | 6.97 | 2.29 | 0.23 | 3.48 | 1.72 |
| Nr2c1   | 0    | 0    | 0.55 | 2.92 | 0.03 |
| Nr2c2   | 2.33 | 1.18 | 1.07 | 3.82 | 0.13 |
| Nr2c2ap | NA   | NA   | 0    | 0.47 | 1.18 |
| Nr2e1   | 0.43 | 2.02 | 0    | 1.69 | 0    |
| Nr2e3   | 0.57 | 1.57 | 0.59 | 2.4  | 3.08 |
| Nr2f1   | 0    | 0    | 1.73 | 2.42 | NA   |
| Nr2f2   | 2.09 | 0.47 | 0.6  | 1.6  | 0    |
| Nr2f6   | 0.13 | 1.8  | 1.27 | 1.6  | 1.14 |
| Nr3c1   | 0.63 | 0.24 | 0    | 1.3  | 2.83 |
| Nr3c2   | 0.43 | 0    | 0.51 | 0.59 | 0    |
| Nr4a1   | 0    | 0.99 | 1.88 | 1.24 | 1.09 |
| Nr4a2   | 1    | 0.09 | 1.25 | 0.06 | 0.74 |
| Nr4a3   | 0    | 0.64 | 0.47 | 0.59 | 0    |
| Nr5a1   | 0.81 | 0.74 | 0.1  | 1.53 | 3.06 |
| Nr5a2   | 1.01 | 0.96 | 0.34 | 0.77 | 2.24 |
| Nr6a1   | 0.58 | 1.37 | 0.84 | 0    | 1.75 |
| Nrap    | 0.31 | 1.26 | 1.42 | NA   | 0    |
| Nrarp   | NA   | NA   | 0.27 | 2.88 | 0    |
| Nras    | 0.45 | 2.46 | 3.08 | NA   | 1.19 |
| Nrbf2   | 0    | 1.29 | 1.33 | 0.85 | 0    |
| Nrbp1   | NA   | 1.59 | 0.64 | 0    | 2.69 |
| Nrbp2   | NA   | NA   | 0.88 | 0.17 | 0    |
| Nrcam   | NA   | 0.86 | 0.6  | 0    | 1.33 |

|         |      |      |      |      |      |
|---------|------|------|------|------|------|
| Nrd1    | 0.14 | 1.78 | 2.17 | 2.85 | 0    |
| Nrde2   | NA   | 2.24 | 0.64 | 0    | NA   |
| Nrep    | NA   | 0    | 0.69 | 1.2  | NA   |
| Nrf1    | 0.82 | 0    | 0.55 | 0.85 | 0.7  |
| Nrg1    | 0    | 0.65 | 1.22 | 1.64 | 5.09 |
| Nrg2    | 2.01 | 1.07 | 0.44 | 0.74 | 1.18 |
| Nrg3    | 1.59 | NA   | 0.85 | 2.47 | 3.97 |
| Nrg4    | 2.2  | NA   | 1.23 | 3.65 | 0.05 |
| Nrgn    | 0    | 0    | 0.72 | 0.79 | 0.91 |
| Nrip1   | 0    | 1.25 | 1.36 | 0    | 1.74 |
| Nrip2   | 0.24 | 1.68 | 0.44 | 2.15 | 0    |
| Nrip3   | 0.78 | 1.29 | 0.62 | 1.29 | 0    |
| Nrk     | 0.99 | NA   | 0.39 | 0.94 | 1.61 |
| Nrl     | 0.52 | 0.96 | 0.95 | NA   | 2.52 |
| Nrm     | 0.06 | NA   | 1.12 | 0.94 | 2.08 |
| Nrn1    | 0.57 | 2.37 | 1    | 1.14 | 3.74 |
| Nrn11   | NA   | NA   | NA   | 0.98 | NA   |
| Nrp1    | NA   | 0.74 | 0.87 | 0.93 | 2.26 |
| Nrp2    | 0.49 | 1.05 | 0.86 | 2.27 | 0    |
| Nrsn1   | NA   | NA   | 2.46 | 0.25 | 1.87 |
| Nrsn2   | NA   | 0.89 | 0.9  | NA   | 0    |
| Nrtn    | 1.48 | 1.87 | 2.04 | 1.26 | 0    |
| Nrxn1   | 0.21 | 0.32 | 0.56 | 0    | 1.22 |
| Nrxn2   | 1.06 | 1.18 | 0.31 | 0.44 | 0.87 |
| Nrxn3   | 0.11 | 0.37 | 0.45 | 1.09 | 0    |
| Nsa2    | NA   | 0    | 1.77 | 0    | NA   |
| Nsbp1   | 1.13 | NA   | NA   | NA   | NA   |
| Nsd1    | 0.29 | 0.83 | 0.61 | 1.99 | 0.07 |
| Nsdhl   | 0.03 | 1.04 | 1.25 | 0.51 | 0.6  |
| Nsf     | 1.52 | 0.23 | 1.08 | 0.85 | 2.05 |
| Nsfl1c  | 0.51 | 0.71 | 2.22 | 0    | 0.55 |
| Nsg1    | NA   | 0    | 2.37 | 0.56 | NA   |
| Nsl1    | NA   | 0    | 0.61 | 0.86 | 0.49 |
| Nsmaf   | 1.17 | 0.99 | 2.56 | 1.01 | 0    |
| Nsmce1  | NA   | NA   | 1.24 | 1.31 | 3.13 |
| Nsmce2  | NA   | NA   | 0.53 | 0.86 | 2.06 |
| Nsmce4a | NA   | 0.28 | 0.74 | 1.21 | 0    |
| Nsmf    | NA   | 0    | 2.31 | 0.84 | NA   |
| Nsun2   | 1.54 | NA   | 1.64 | 1.4  | 3.17 |
| Nsun3   | 2.7  | 0    | 0.98 | NA   | 0    |
| Nsun4   | NA   | NA   | 0    | 0.78 | 0.61 |

|        |       |      |      |      |       |
|--------|-------|------|------|------|-------|
| Nsun5  | NA    | 0.32 | 0    | 2.51 | 2.68  |
| Nsun6  | NA    | 2.32 | 0.6  | 0.74 | 0     |
| Nsun7  | NA    | 2.72 | 1.43 | 1.65 | 0     |
| Nt5c   | 0.19  | 1.64 | 0.63 | 0.75 | 1.11  |
| Nt5c1a | NA    | NA   | NA   | 0.9  | NA    |
| Nt5c1b | 0     | NA   | 0.72 | 3.92 | 2.23  |
| Nt5c2  | 0.69  | 0.32 | 1.65 | 1.4  | 0     |
| Nt5c3  | 0.25  | NA   | NA   | NA   | 1.64  |
| Nt5c3b | NA    | NA   | 7.82 | 0    | NA    |
| Nt5c3l | NA    | NA   | NA   | NA   | 1.41  |
| Nt5dc1 | NA    | NA   | 2.53 | 1.77 | 3.23  |
| Nt5dc2 | NA    | 0.74 | 3.71 | NA   | 0     |
| Nt5dc3 | NA    | 0.9  | 0.51 | 4.47 | 3.69  |
| Nt5e   | 1.62  | 0    | 0.37 | 0.89 | 2.77  |
| Nt5m   | 0.62  | 0.98 | 0.16 | 0.55 | 0     |
| Ntan1  | 0     | 2.36 | 1.26 | 0    | 0     |
| Ntf3   | 2.54  | 0.75 | 0.63 | 1.41 | 2.95  |
| Ntf5   | 0.09  | NA   | NA   | NA   | NA    |
| Nthl1  | 1.38  | 1.78 | 0.76 | 0.26 | 0     |
| Ntm    | NA    | 0.38 | 1.79 | 5.61 | 1.69  |
| Ntmt1  | NA    | NA   | 0.71 | NA   | NA    |
| Ntn1   | 0     | 1.29 | 0.6  | 6.15 | 0     |
| Ntn3   | NA    | 0    | 8.35 | 1.03 | 7.67  |
| Ntn4   | 1.48  | NA   | 1.62 | 0.87 | 0     |
| Ntn5   | NA    | NA   | 2.44 | 0.33 | NA    |
| Ntng1  | 0.87  | 0.76 | 0.05 | 1.85 | 0     |
| Ntng2  | 0     | NA   | 0    | 0    | 0     |
| Ntper  | NA    | NA   | 1.25 | 0    | NA    |
| Ntrk1  | 0     | 1.03 | 2.15 | NA   | 13.75 |
| Ntrk2  | 1.06  | 0.59 | 0.55 | 1.24 | 0     |
| Ntrk3  | 0.04  | 0.9  | 0.03 | 0    | 1.64  |
| Nts    | 0.63  | 2.66 | 2.51 | 0    | 2.71  |
| Ntsr1  | 13.04 | 3.98 | 0.73 | 0.13 | 8.29  |
| Ntsr2  | 0     | 1.07 | 3.52 | 0    | 17.04 |
| Nuak1  | NA    | 2.43 | 2.83 | 0    | 3.24  |
| Nuak2  | NA    | 1.17 | 0.13 | 0.25 | NA    |
| Nub1   | NA    | NA   | 1.12 | 1.77 | 0.1   |
| Nubp1  | 0.63  | 1.52 | 0.07 | 0.47 | 0     |
| Nubp2  | 0     | 1.59 | 0.43 | 1.04 | 0.64  |
| Nubpl  | NA    | 2.86 | 0    | 0.27 | 2.97  |
| Nucb1  | 0.21  | 2.62 | 1.57 | 0    | 1.92  |

|          |      |      |      |      |      |
|----------|------|------|------|------|------|
| Nucb2    | 1.07 | 0.98 | 1.19 | 0.41 | 2.68 |
| Nucks1   | NA   | 0.03 | 0.78 | 0.85 | 0    |
| Nude     | 0.14 | 1.34 | 1    | 2    | 1.39 |
| Nuded1   | NA   | NA   | 0    | 0.51 | 1.43 |
| Nuded2   | NA   | NA   | 0.23 | 0.68 | 0    |
| Nuded3   | NA   | 0    | 0.62 | 0    | 0.11 |
| Nudt1    | 0.1  | 1.04 | 2.14 | 0.06 | 0    |
| Nudt10   | 0.91 | NA   | 1.04 | 1.46 | 0    |
| Nudt11   | 0    | 0    | 0    | 2.57 | 0.96 |
| Nudt12   | 0    | NA   | 2.41 | 0.91 | 1.37 |
| Nudt13   | 2.33 | 0.4  | 0.89 | 0.36 | 0.98 |
| Nudt14   | 0    | NA   | 3.05 | 1    | 0.53 |
| Nudt15   | 0.72 | 1.55 | 0.64 | 0.58 | 0    |
| Nudt16   | NA   | NA   | 1.28 | 3.53 | 0.97 |
| Nudt16l1 | NA   | NA   | 1.89 | 0    | 0    |
| Nudt17   | NA   | NA   | 0.51 | 0.73 | 2.08 |
| Nudt18   | NA   | 2.65 | 1.3  | 0.6  | 0.99 |
| Nudt19   | NA   | NA   | 2.12 | NA   | 0    |
| Nudt2    | 0.99 | 0.15 | 4.29 | 0    | 0    |
| Nudt21   | NA   | 1.09 | 0.97 | 1.13 | 0    |
| Nudt22   | NA   | NA   | 2.03 | 4.69 | 0    |
| Nudt3    | 0.86 | 2.38 | 1.63 | NA   | NA   |
| Nudt4    | 0.11 | 0.23 | 1.8  | 1.71 | 4.84 |
| Nudt5    | 0.09 | NA   | 1.21 | 3.79 | 0    |
| Nudt6    | 0    | 1.22 | 0.5  | 0.8  | 0.97 |
| Nudt7    | NA   | 1.42 | 1.03 | 0.58 | 1.25 |
| Nudt8    | 0.2  | NA   | NA   | 0.69 | NA   |
| Nudt9    | 0.33 | 0.15 | 0.24 | 1.05 | 1.96 |
| Nuf2     | NA   | NA   | 2.4  | 0.49 | 1.27 |
| Nufip1   | 0    | 1.75 | 1.52 | 0.71 | 1    |
| Nufip2   | NA   | NA   | 2.27 | 1.96 | 0.88 |
| Nuggc    | NA   | NA   | NA   | 3.3  | NA   |
| Numa1    | 0.17 | 0    | 1.91 | 0    | 1.78 |
| Numb     | 0.78 | 1.77 | 0.54 | 3.84 | 0    |
| Numbl    | 0.57 | NA   | 2.06 | 1.81 | 0.8  |
| Nup107   | 0.65 | 0    | 1.23 | 0.68 | 0    |
| Nup133   | 0.41 | 0    | 0.87 | 0    | 0    |
| Nup153   | 1.15 | 0    | 0.71 | 1.21 | 1.88 |
| Nup155   | 0.48 | 0    | 1.16 | 0    | 0    |
| Nup160   | 0.7  | 1.4  | 0.64 | 6.13 | 0    |
| Nup188   | 2.84 | 0.84 | 0.65 | 2.47 | 0.19 |

|         |      |      |      |      |      |
|---------|------|------|------|------|------|
| Nup205  | 0.75 | 0.58 | 1.98 | 0    | 1.47 |
| Nup210  | 1.14 | 0    | 0.44 | 2.54 | 3.22 |
| Nup210l | NA   | NA   | 0.42 | 0    | 0    |
| Nup214  | NA   | 1.18 | 0.38 | 1.05 | 0.09 |
| Nup35   | 0.69 | NA   | 3.25 | 2.46 | 3.16 |
| Nup37   | 0    | 0.12 | 1.24 | 1.83 | 0    |
| Nup43   | 0.59 | 1.54 | 1.01 | 1.9  | 0    |
| Nup50   | 0.3  | 0.49 | 1.67 | 0.98 | 1.03 |
| Nup54   | 0.75 | 0.46 | 1.44 | 0.03 | 0.04 |
| Nup62   | 0.87 | 1.36 | 1.45 | NA   | 0    |
| Nup62cl | NA   | NA   | NA   | 9.1  | NA   |
| Nup85   | NA   | 0.45 | 1.27 | 1.37 | 0    |
| Nup88   | 0    | 2.21 | 1.07 | 0    | 0    |
| Nup93   | 0.04 | 0    | 0.08 | 0.26 | 1.76 |
| Nup98   | 0.59 | 1.18 | 0.55 | 4.09 | 0    |
| Nupl1   | 0.5  | 1.41 | 0.32 | NA   | 0.03 |
| Nupl2   | 0    | 0.58 | 0.14 | 0.43 | 0.94 |
| Nupr1   | 0.56 | 0.51 | 0    | 0.87 | 3.22 |
| Nupr1l  | NA   | NA   | NA   | 2.6  | NA   |
| Nus1    | NA   | 1.08 | 2.36 | 1.24 | 0    |
| Nusap1  | 0    | 1.48 | 0.97 | 0.99 | 0.57 |
| Nut     | 0    | NA   | NA   | NA   | NA   |
| Nutf2   | 0.25 | 1.24 | 1.31 | 2.05 | 0    |
| Nutm1   | NA   | NA   | 0    | 1.17 | NA   |
| Nvl     | 0.76 | 2    | 1.32 | 0.84 | 1.12 |
| Nwd1    | NA   | NA   | NA   | 0.25 | NA   |
| Nxf1    | 0.6  | 2.23 | 2.51 | 3.94 | 0.65 |
| Nxf2    | 0.77 | 2.24 | 1.44 | NA   | 0    |
| Nxf3    | NA   | 1.83 | 0.15 | 0.72 | 2.47 |
| Nxn     | 0.51 | 2.16 | 1.68 | 0.38 | 0    |
| Nxn1l   | NA   | NA   | 0    | 0.45 | NA   |
| Nxn12   | NA   | NA   | 1.55 | 1.6  | NA   |
| Nxpe2   | NA   | NA   | NA   | 0    | NA   |
| Nxpe3   | NA   | 1.43 | 2.09 | 1.27 | NA   |
| Nxpe4   | NA   | 1.17 | 2.28 | 1.61 | NA   |
| Nxph1   | 1.65 | NA   | 0    | 3.5  | 1.1  |
| Nxph2   | 3.88 | NA   | 0.61 | 2.81 | 0    |
| Nxph3   | 0.56 | 0.51 | 1.46 | 0.79 | 3.02 |
| Nxph4   | 0    | 1.68 | 1.39 | 0.93 | 6.36 |
| Nxt1    | 0    | 3.36 | 1.52 | 2.18 | 0    |
| Nxt2    | 1.66 | 0    | 1.01 | 0.76 | 0.26 |



|         |      |      |      |      |      |
|---------|------|------|------|------|------|
| Nyap1   | NA   | NA   | 0.25 | 1.24 | NA   |
| Nyap2   | NA   | NA   | NA   | 1.61 | NA   |
| Nynrin  | NA   | 1.22 | 0.27 | 1.29 | NA   |
| Nyx     | 0.83 | 3.61 | 0.94 | 1.2  | 0    |
| Oaf     | NA   | NA   | 2.33 | 1.09 | 0.86 |
| Oard1   | NA   | 1.38 | 0.67 | 2.35 | NA   |
| Oas2    | 0.71 | 3.54 | 1.95 | 1.12 | 0.1  |
| Oas3    | 0.24 | 1.31 | 3.31 | 0    | 0    |
| Oat     | 0    | 1.46 | 1.09 | 1.01 | 0    |
| Oaz1    | 1.81 | 3.35 | 0.51 | NA   | 4.54 |
| Oaz2    | 0    | 0    | 3.59 | 1.13 | 0.97 |
| Oaz3    | 5.94 | 0    | 0.99 | 0    | 0    |
| Obfc1   | 0    | 0.79 | 1.06 | 0.4  | 3.62 |
| Obfc2a  | NA   | NA   | NA   | NA   | 0    |
| Obfc2b  | NA   | NA   | NA   | NA   | 1.87 |
| Obp2a   | NA   | 0.88 | 0.98 | 0.62 | NA   |
| Obp2b   | NA   | NA   | NA   | 0.86 | NA   |
| Obscn   | 0.39 | 1.18 | 2.67 | 1.24 | 0    |
| Obsl1   | NA   | 0.68 | 0.1  | 0.14 | 0    |
| Oc90    | NA   | NA   | NA   | 0.31 | NA   |
| Oca2    | NA   | 1.35 | 2.5  | 0    | 0    |
| Ocel1   | NA   | 1.11 | 1.95 | 0.29 | 0    |
| Ociad1  | NA   | NA   | 2.16 | 0    | 2.56 |
| Ociad2  | NA   | NA   | 0    | 1.08 | 0    |
| Ocln    | 1.62 | NA   | NA   | 0.28 | 1.52 |
| Ocm     | 0.95 | NA   | NA   | 1.32 | NA   |
| Ocrl    | NA   | 0.51 | 0.32 | 0    | 1.57 |
| Ocstamp | NA   | NA   | NA   | 0    | NA   |
| Odam    | NA   | 0.22 | 0    | 0    | 1.91 |
| Odc1    | 1.44 | 0    | 4.26 | 1.24 | 2.13 |
| Odf1    | 3.95 | 0.69 | 1.56 | 1.38 | 1.74 |
| Odf2    | 0.46 | 0    | 0.81 | 0    | 1.55 |
| Odf21   | NA   | NA   | 0.17 | 0.85 | 1.07 |
| Odf3    | 0    | NA   | 0.79 | 3.15 | 0    |
| Odf3b   | NA   | NA   | 0.39 | 0.58 | 0.8  |
| Odf311  | NA   | NA   | NA   | 1.41 | NA   |
| Odf312  | NA   | NA   | NA   | 0    | NA   |
| Odf4    | 2.03 | NA   | 0.69 | 0.77 | NA   |
| Odz1    | 0.59 | NA   | NA   | NA   | 3.27 |
| Odz2    | NA   | NA   | NA   | NA   | 0.55 |
| Odz3    | NA   | NA   | NA   | NA   | 0.55 |

|         |      |      |      |      |      |
|---------|------|------|------|------|------|
| Odz4    | NA   | NA   | NA   | NA   | 1.31 |
| Ofcc1   | 0    | NA   | NA   | 0.11 | NA   |
| Ofd1    | 0    | 3.11 | 0.55 | 0.49 | 3.89 |
| Ogdh    | 0    | 0.11 | 0.03 | 2.92 | 1.1  |
| Ogdhl   | NA   | NA   | NA   | 0    | NA   |
| Ogfod1  | NA   | 0    | 0.55 | 1.27 | 0    |
| Ogfod2  | NA   | 2.16 | 2.16 | 0.91 | 4    |
| Ogfod3  | NA   | 1.48 | 2.21 | NA   | NA   |
| Ogfr    | 0.32 | 1.29 | 0.1  | 1.83 | 0    |
| Ogfrl1  | 0    | 0.39 | 3.25 | 1.14 | 2.81 |
| Ogg1    | 0.89 | 1.17 | 0.58 | 1.33 | 0    |
| Ogn     | 1.93 | 1.7  | 0.66 | 2.6  | 0    |
| Ogt     | 1.02 | 0.59 | 1.11 | 0    | 0.98 |
| Oip5    | NA   | 1.2  | 2.14 | NA   | 2.88 |
| Oit3    | 1.02 | NA   | 0.48 | 0    | 2.31 |
| Ola1    | NA   | 1.04 | 0.1  | 0.02 | 0    |
| Olah    | NA   | 2.33 | 0.2  | 1.29 | 0    |
| Olfm1   | 1.14 | 2.16 | 2.11 | 0    | 3.92 |
| Olfm2   | NA   | NA   | 0.14 | 0.58 | 0    |
| Olfm3   | 1.29 | NA   | 0.72 | 5.3  | NA   |
| Olfm4   | NA   | 0.98 | 0.73 | 1.04 | 0    |
| Olfml1  | 0    | 3.55 | 0.87 | 0    | 0    |
| Olfml2a | 0.63 | 2.17 | 1.7  | 0.85 | 2.98 |
| Olfml2b | 0    | 0    | 2.14 | 1.23 | 0    |
| Olfml3  | 0.43 | 0.98 | 2.47 | 0.21 | 0    |
| Olig1   | 2.54 | NA   | 4.44 | 0.91 | 0.35 |
| Olig2   | 0.7  | 1.04 | 1.23 | 2.11 | 0.31 |
| Olig3   | 0.95 | NA   | 0.91 | 0.61 | NA   |
| Olr1    | 1.71 | 1.19 | 1.85 | 1.51 | 0    |
| Oma1    | NA   | NA   | 1.87 | 0.78 | 0    |
| Omd     | 1.76 | 0.06 | 1.07 | 0.51 | 2.39 |
| Omg     | 1.33 | 3.98 | 0.68 | 0.15 | 0    |
| Omp     | 0.35 | 1.74 | 0.71 | 1.11 | 3.57 |
| Onecut1 | 0.54 | 2.02 | 0.26 | 1.21 | 0    |
| Onecut2 | 0.65 | 1.32 | 0.54 | 2.19 | 1.9  |
| Onecut3 | NA   | NA   | 3.74 | NA   | 3.15 |
| Ooep    | NA   | NA   | 0.58 | NA   | 1.39 |
| Opa1    | 0.06 | 0.32 | 0.86 | 0.59 | NA   |
| Opa3    | NA   | 1.2  | 1.62 | 0.86 | 1.09 |
| Opalin  | NA   | NA   | 0    | 0.17 | 0    |
| Opcml   | NA   | 0.49 | 0    | 1.28 | 2.47 |

|         |      |      |      |       |      |
|---------|------|------|------|-------|------|
| Ophn1   | 1.02 | 0.65 | 2.88 | 0.6   | 0.56 |
| Oplah   | 1.03 | 2.89 | 4.42 | NA    | 0    |
| Opn1sw  | 3.33 | 0.7  | 1.28 | 2.77  | 1.61 |
| Opn3    | 0.35 | 2.19 | 0.58 | 0.13  | 3.19 |
| Opn4    | 0    | NA   | 1.64 | 0.42  | 0    |
| Opn5    | 0    | NA   | NA   | 0     | NA   |
| Oprd1   | 0.45 | 0.17 | 0    | 0.98  | 3.28 |
| Oprk1   | 0    | 1.87 | 0.07 | 10.73 | 3.7  |
| Oprl1   | NA   | 0.14 | 0.97 | 1.28  | 1.77 |
| Oprm1   | 0.89 | 1.2  | 0    | 1.66  | 0    |
| Oprs1   | 1.07 | NA   | NA   | NA    | NA   |
| Optc    | 1.68 | NA   | 0.4  | 1.8   | 1.34 |
| Optn    | 1.04 | 0.82 | 0.72 | 1.25  | 3.91 |
| Orai1   | NA   | NA   | 1    | 1.78  | 0    |
| Orai2   | NA   | 1.48 | 2.05 | 1.71  | 3.53 |
| Orai3   | NA   | 1.96 | 1.64 | 2.09  | 0    |
| Oraov1  | 0    | NA   | 1.42 | 0.76  | 0    |
| Orc1    | NA   | 1.38 | 2.82 | 0.45  | NA   |
| Orc11   | 3.35 | NA   | NA   | NA    | 2.05 |
| Orc2    | NA   | 0.42 | 0.54 | 1.49  | NA   |
| Orc21   | 3.81 | NA   | NA   | NA    | 0.2  |
| Orc3    | NA   | 0    | 0.68 | 0.56  | NA   |
| Orc31   | 0    | NA   | NA   | NA    | 0    |
| Orc4    | NA   | 1.65 | 1.67 | 0.85  | NA   |
| Orc41   | 0.15 | NA   | NA   | NA    | 0    |
| Orc5    | NA   | 2.12 | 1.35 | 0.57  | NA   |
| Orc51   | 0.26 | NA   | NA   | NA    | 2.96 |
| Orc6    | NA   | 1.55 | 0.67 | 0.5   | NA   |
| Orc61   | 0.1  | NA   | NA   | NA    | 0.64 |
| Orm1    | 0.21 | 1.14 | 2.21 | 0.91  | 0    |
| Orm2    | 1.26 | 0.42 | 1.23 | 1.58  | NA   |
| Ormdl1  | NA   | NA   | 0.67 | 0.57  | 2.95 |
| Ormdl2  | 0    | 0    | 0.91 | NA    | 0    |
| Ormdl3  | 0.03 | NA   | 0.5  | 2.37  | 3.09 |
| Os9     | NA   | 0.23 | 0.12 | 0     | 1.61 |
| Osbp    | 0    | 0    | 3.08 | 0     | 0    |
| Osbp2   | 1.59 | 0    | 1.36 | 2.7   | 0    |
| Osbp110 | 2.84 | 0.74 | 0.51 | 3.31  | NA   |
| Osbp111 | 0    | 0.53 | 2.11 | 2.38  | 0.53 |
| Osbp11a | 1.05 | 2.09 | 2.04 | 2.23  | 2.16 |
| Osbp12  | 0.09 | 0.57 | 2.88 | 0.07  | 2.04 |

|         |      |      |      |      |      |
|---------|------|------|------|------|------|
| Osbp13  | 0.55 | 0    | 0.8  | 0.29 | 1.89 |
| Osbp15  | 0.97 | NA   | 2.37 | 1.8  | 1.15 |
| Osbp16  | 0.63 | NA   | 0.51 | 1.77 | 2    |
| Osbp17  | 1    | 0    | 1.4  | 0.93 | 0    |
| Osbp18  | 0    | 3.56 | 2.02 | 1.37 | 1.21 |
| Osbp19  | 0.28 | 0.88 | 1.21 | 0.61 | 0    |
| Oscar   | 0.23 | NA   | 0    | 0.54 | NA   |
| Oscpl   | NA   | NA   | 3.09 | 0.04 | NA   |
| Osgep   | 0.2  | 0    | 0.26 | 0.84 | 0    |
| Osgep11 | 0    | 0    | 1.01 | 1.62 | 2.1  |
| Osgin1  | NA   | 0    | 2.04 | 2.26 | 4.65 |
| Osgin2  | NA   | 0.87 | 1.53 | 0.51 | 2.33 |
| Osm     | 0.36 | 0.14 | 3.24 | 0    | 0    |
| Osmr    | 0.38 | 0.44 | 0.42 | 1.49 | 1.43 |
| Osr1    | 0.2  | NA   | 2.9  | 2.4  | 0    |
| Osr2    | 0.81 | 1.95 | 0.83 | 0.69 | 0    |
| Ost4    | NA   | NA   | 0.55 | NA   | NA   |
| Ostc    | NA   | NA   | 0.66 | 1.06 | 0    |
| Ostf1   | 0.06 | 0    | 1.98 | 1.21 | 0.99 |
| Ostm1   | 0.6  | 2.34 | 2.49 | 2.4  | 0    |
| Ostn    | 0.22 | NA   | NA   | 0    | NA   |
| Otc     | 1.94 | 0.47 | 0    | 2    | 3.04 |
| Otoa    | 0    | NA   | NA   | 0    | NA   |
| Otof    | 0.53 | 1.56 | 0.8  | 1.44 | 2.3  |
| Otog    | 0.2  | NA   | NA   | NA   | NA   |
| Otogl   | NA   | NA   | NA   | 0.87 | NA   |
| Otol1   | NA   | NA   | NA   | 1.16 | NA   |
| Otop1   | 1.82 | NA   | NA   | 1.48 | NA   |
| Otop2   | 3.38 | NA   | 2.85 | 1.33 | 7.09 |
| Otop3   | 0.51 | NA   | NA   | 1.73 | NA   |
| Otor    | 5.48 | 0.24 | 4.01 | 0    | 1.6  |
| Otos    | 1.44 | NA   | 0    | 2.02 | 3.88 |
| Otp     | 0.64 | NA   | 1.15 | 0.91 | 0    |
| Otub1   | 1.88 | 1.71 | 0.11 | 0.63 | 0    |
| Otub2   | 0.26 | 1.89 | 2.13 | 0    | 0    |
| Otud1   | NA   | NA   | 3.27 | 1.15 | 0.17 |
| Otud3   | NA   | 0    | 6.37 | 1.2  | 8.08 |
| Otud4   | NA   | 0.1  | 0.66 | 0.78 | 1.29 |
| Otud5   | NA   | NA   | 0.02 | 0    | 0.01 |
| Otud6a  | NA   | NA   | NA   | 1.41 | NA   |
| Otud6b  | NA   | NA   | 0.99 | 0.29 | 1.95 |

|        |      |      |      |      |      |
|--------|------|------|------|------|------|
| Otud7a | NA   | NA   | 0.83 | 1.4  | NA   |
| Otud7b | NA   | 2.51 | 0.11 | 2.8  | 0    |
| Otx1   | 0.31 | NA   | 1.71 | 3.27 | 5.62 |
| Otx2   | 0.45 | NA   | 0.87 | 0    | 0    |
| Ovca2  | 1.72 | 1.25 | 2.02 | 2.35 | NA   |
| Ovch2  | NA   | NA   | NA   | 2.14 | NA   |
| Ovgp1  | 0.26 | 0.78 | 1.08 | 0.16 | 0    |
| Ovol1  | 2.38 | 1.02 | 0.88 | 1.77 | 2.02 |
| Ovol2  | NA   | 0.44 | 1.3  | 0.07 | 2.07 |
| Oxa11  | 0    | 0    | 2.33 | 0.61 | 0    |
| Oxct1  | 2.22 | 0    | 1.34 | 0    | 0.96 |
| Oxgr1  | NA   | NA   | 0.05 | 0.46 | NA   |
| Oxld1  | NA   | 2.92 | 1.3  | 0.67 | NA   |
| Oxnad1 | NA   | NA   | 0.01 | 0.6  | 0    |
| Oxr1   | 0.24 | 2.06 | 1.52 | 0.44 | 0    |
| Oxsm   | NA   | 0.82 | 0.74 | 0    | 0    |
| Oxsr1  | NA   | 1.05 | 1.45 | 0.13 | 0    |
| Oxt    | 2.13 | 1.23 | 0.68 | 0.71 | 3.47 |
| Oxtr   | 0.08 | 0.69 | 3.32 | 2.69 | 2.15 |
| P2rx1  | 1.38 | 2.73 | 0.27 | 1.4  | 0.61 |
| P2rx2  | 0.47 | 1.42 | 5.1  | 1.11 | 0    |
| P2rx3  | 0.13 | 0.38 | 0.47 | 2.58 | 0    |
| P2rx4  | 0    | 0.74 | 2.29 | 1.21 | 0.63 |
| P2rx5  | 0.54 | 3.68 | 0    | 0.09 | 0    |
| P2rx6  | NA   | 1.71 | 0.57 | 0.39 | 0    |
| P2rx7  | 1.99 | 0.83 | 1.78 | 3.01 | 4.09 |
| P2rx11 | 1.48 | NA   | NA   | NA   | NA   |
| P2ry1  | 0.14 | 2.3  | 0.06 | 4.42 | 1.22 |
| P2ry10 | 0.21 | 0    | 0    | 1    | 2.67 |
| P2ry12 | 3.13 | NA   | 1.06 | 0.89 | 0    |
| P2ry13 | 0.16 | 1.18 | 3.72 | 2.48 | 0    |
| P2ry14 | 0.83 | 2.88 | 3.02 | 1.74 | 1.05 |
| P2ry2  | 0.4  | 1.54 | 2.49 | 3.26 | 0    |
| P2ry4  | 0.7  | 1.5  | 2.36 | 1.37 | 6.41 |
| P2ry6  | 0.49 | 1.4  | 2.28 | 6.83 | 6.75 |
| P4ha1  | 0.66 | 0.71 | 1.81 | 0.53 | 1.83 |
| P4ha2  | 0.24 | 2.4  | 0.28 | 0.24 | 0.82 |
| P4ha3  | 1.61 | NA   | 4.27 | 0.68 | 0    |
| P4hb   | 0.8  | 2.16 | 1.53 | 1.34 | 0    |
| P4htm  | NA   | 0    | 1.48 | 0    | 0    |
| P518   | 3.52 | NA   | NA   | NA   | NA   |

|          |      |      |      |      |      |
|----------|------|------|------|------|------|
| Pa2g4    | 0.17 | 1.63 | 0    | 0.13 | 0    |
| Pabpc1   | 0.74 | 0.76 | 2.12 | 2.07 | 0    |
| Pabpc11  | NA   | NA   | 0    | 0    | 2.22 |
| Pabpc4   | NA   | 0    | 1.09 | 1.64 | 0    |
| Pabpc41  | NA   | NA   | 0.37 | NA   | 0    |
| Pabpc5   | 0    | NA   | 0.41 | 2.27 | 0    |
| Pabpn1   | 0    | 0.13 | 0.7  | 0.05 | 0    |
| Pacrg    | 1.45 | 0.74 | 1.77 | 0    | 0    |
| Pacrgl   | NA   | NA   | 0.34 | 0    | 0    |
| Pacs1    | 0    | 0.12 | 2.03 | 0.72 | 0.43 |
| Pacs2    | NA   | 0    | 1.18 | 0.51 | 0    |
| Pacsin1  | 0.47 | NA   | 0.46 | 0    | 0.5  |
| Pacsin2  | 1.53 | 0.51 | 2.38 | 0.14 | NA   |
| Pacsin3  | 0.57 | 1.55 | 0.58 | 0    | 2.28 |
| Padi1    | 0.36 | 0.07 | 0.38 | 0.1  | 0    |
| Padi2    | 1.2  | 2.85 | 1.16 | 0.88 | 5.09 |
| Padi3    | 0.67 | 0.59 | 0.91 | 1.22 | 1.61 |
| Padi4    | 0.83 | 0    | 1.81 | 2.48 | 0    |
| Padi6    | 0.1  | NA   | NA   | 0.43 | NA   |
| Paf1     | NA   | 0.39 | 1.71 | 0.33 | 0    |
| Pafah1b1 | 0.47 | 0.25 | 1.16 | 0    | 0.14 |
| Pafah1b2 | 0.24 | 0.01 | 1.28 | 0.63 | 0    |
| Pafah1b3 | 0    | 0.19 | 1.29 | NA   | 0.24 |
| Pafah2   | 0    | 0    | 1.5  | 0.88 | 0    |
| Pag1     | NA   | NA   | 1.54 | 1.63 | 0.47 |
| Pah      | 0    | 2.5  | 2.14 | 1.95 | 2.5  |
| Paics    | 0.12 | 0    | 0.74 | 0    | 0    |
| Paip1    | 2.08 | 0.46 | 0.95 | 0.41 | 0    |
| Paip2    | 0    | NA   | 2.71 | 0    | 0    |
| Paip2b   | NA   | 0.03 | 1.31 | 0.1  | 0    |
| Pak1     | 0    | 1.44 | 0.65 | 1.53 | 0.76 |
| Pak1ip1  | 0.84 | 1.27 | 2.52 | 2.8  | 0    |
| Pak2     | 0    | 0.9  | 0.02 | 2.12 | 0.68 |
| Pak3     | 1.15 | 0.51 | 0.55 | 0.74 | 3.24 |
| Pak4     | 0.88 | 1.26 | 0.88 | 1.3  | 3.17 |
| Pak6     | NA   | 0.73 | 0.86 | 0.9  | 0    |
| Pak7     | 0.49 | 0.57 | 0.06 | 1.67 | 1.56 |
| Palb2    | NA   | 0    | 2.67 | 0.92 | 3.47 |
| Pald1    | NA   | NA   | 2.13 | 1.42 | NA   |
| Palld    | NA   | 0.59 | 0.07 | 0.15 | 0    |
| Palm     | 0.43 | 1.2  | 0.43 | 1.75 | 1.31 |

|        |       |      |      |      |      |
|--------|-------|------|------|------|------|
| Palm2  | 1     | NA   | 0.88 | NA   | NA   |
| Palm3  | NA    | NA   | NA   | 2.21 | NA   |
| Palmd  | 2.32  | 1.12 | 2.88 | 3.21 | 0    |
| Pam    | 0     | 0    | 0.87 | 0    | 0    |
| Pam16  | NA    | 1.54 | 4.57 | NA   | NA   |
| Pamci  | 0.92  | NA   | NA   | NA   | NA   |
| Pamr1  | NA    | 1.61 | 0.82 | 5.45 | 0    |
| Pan2   | NA    | 0    | 0.24 | 0    | 4.72 |
| Pan3   | NA    | NA   | 2.73 | 1.3  | 0    |
| Pank1  | 2.16  | NA   | 1.13 | 0.9  | 0.73 |
| Pank2  | 1.01  | 2.02 | 0    | 1.17 | 0    |
| Pank3  | 0.45  | 0.87 | 1.86 | 0    | 1.47 |
| Pank4  | 0.91  | 0    | 1.33 | 0    | 1.45 |
| Panx1  | 0.63  | 2.15 | 1.43 | 0.66 | 1.93 |
| Panx2  | NA    | NA   | 0    | 0.57 | 1.75 |
| Panx3  | 0.16  | NA   | 1.3  | 5.11 | 1.59 |
| Paox   | 0.43  | 0.84 | 2.41 | 1.31 | NA   |
| Papd1  | 0     | NA   | NA   | NA   | NA   |
| Papd4  | 1.94  | NA   | 0.85 | 2.71 | 0    |
| Papd5  | NA    | NA   | 1.25 | 0.46 | 0    |
| Papd7  | NA    | 0.75 | 0.89 | 0.39 | NA   |
| Papln  | 0.93  | NA   | 0    | 0.01 | 0    |
| Papola | 0     | 0.78 | 1.6  | 2.06 | 0    |
| Papolb | 0.83  | 0.74 | 1.89 | 0.52 | 6.21 |
| Papolg | 0.71  | 1.76 | 1.95 | 0.69 | 0    |
| Pappa  | 10.78 | 0.05 | 0.09 | NA   | 1.48 |
| Pappa2 | 0.29  | 0    | 3.41 | 1.18 | 0    |
| Papss1 | 0     | 0.68 | 0.89 | 4.01 | 0.14 |
| Papss2 | 1.17  | 0    | 1.42 | 5    | 2.57 |
| Paqr3  | 0.42  | 2.98 | 2.54 | 1.93 | 5    |
| Paqr4  | 0     | 0    | 3.04 | NA   | 1.37 |
| Paqr5  | NA    | 0.38 | 0.84 | 1.24 | 1.26 |
| Paqr6  | 0.02  | 0.6  | 0.89 | 1.01 | 4.27 |
| Paqr7  | NA    | NA   | 1    | 2.71 | 1.16 |
| Paqr8  | NA    | NA   | 0    | 1.68 | 2.94 |
| Paqr9  | 0.56  | NA   | 0.77 | 0    | NA   |
| Parc   | 3.48  | NA   | NA   | NA   | NA   |
| Pard3  | 1.01  | 0.78 | 0.14 | 5.65 | 0    |
| Pard3b | NA    | NA   | 0.48 | 0.52 | 0    |
| Pard6a | 0.06  | 3.27 | 0    | 0.72 | 0    |
| Pard6b | 0.64  | 0.7  | 2.53 | 0.4  | 0    |

|        |      |      |      |      |      |
|--------|------|------|------|------|------|
| Pard6g | 0.85 | NA   | 1.01 | 0    | 1.53 |
| Parg   | 0.04 | 0.02 | 1.68 | NA   | 0    |
| Park2  | 0    | 1.23 | 0.7  | 0    | 0    |
| Park7  | 0.12 | 1.04 | 3.36 | 1.38 | 0    |
| Parl   | NA   | 0.08 | 1.48 | 0.49 | 0    |
| Parm1  | NA   | 0.06 | 0.99 | 2.01 | NA   |
| Parn   | 0    | 0    | 1.16 | 2.58 | 0    |
| Parp1  | NA   | 0    | 2.22 | 0    | 0    |
| Parp10 | NA   | NA   | 0.66 | 0    | NA   |
| Parp11 | NA   | 2.11 | 0.72 | 0.62 | 0.75 |
| Parp12 | NA   | 2.43 | 2.34 | 0    | 0    |
| Parp14 | 0.43 | NA   | 2.6  | 0    | 0    |
| Parp16 | 0    | 0    | 2.48 | 3.84 | 0    |
| Parp2  | NA   | 0    | 1.09 | 0    | 0    |
| Parp3  | NA   | 1.3  | 1.56 | 1.94 | 0    |
| Parp4  | NA   | 0.89 | 1.02 | 1.58 | 1.7  |
| Parp6  | 0.38 | 0.05 | 1.34 | 2.05 | 1.94 |
| Parp8  | 0.2  | 0.9  | 0.63 | 0.98 | 1.05 |
| Parp9  | NA   | NA   | 1.3  | NA   | 0.34 |
| Parpbp | NA   | 1.27 | 1.21 | NA   | NA   |
| Pars2  | NA   | NA   | 0.93 | 1.72 | 1.22 |
| Parva  | 0.88 | 0.71 | 1.01 | 1.54 | 1.68 |
| Parvb  | 0.6  | 1.18 | 2.8  | 1.5  | 0    |
| Parvg  | 0.28 | NA   | 0.75 | 1.45 | 1.96 |
| Pask   | 0    | 0    | 1.91 | 0    | 0    |
| Pate2  | NA   | NA   | NA   | 1.13 | NA   |
| Patl1  | NA   | NA   | 1.2  | 0.23 | 0    |
| Patl2  | NA   | NA   | 1.81 | 4.08 | 0    |
| Patz1  | NA   | 0    | 1.77 | 1.39 | 0    |
| Pawr   | 1.12 | 0.45 | 1.11 | 8    | 3.79 |
| Pax1   | 2.38 | 0.73 | 0.99 | 1.17 | 1.62 |
| Pax2   | 0    | NA   | NA   | 0.72 | NA   |
| Pax3   | 1    | 0.31 | 0.72 | 2.04 | 0    |
| Pax4   | 0.4  | 1.81 | 0.65 | 1.67 | 4.56 |
| Pax5   | 5.05 | 1.1  | 2.03 | 0    | 4.97 |
| Pax6   | 0.06 | 0.59 | 0.49 | 0    | 1.14 |
| Pax7   | 0    | 0    | 0.32 | 1.15 | 2.16 |
| Pax8   | 0.77 | 0.83 | 1.07 | 1.36 | 1.96 |
| Pax9   | 0.35 | 1.01 | 0.07 | 3.25 | 0    |
| Paxbp1 | NA   | 0.22 | 0.43 | 0    | NA   |
| Paxip1 | 5.96 | 0    | 0.83 | 1.2  | 2    |



|         |      |      |      |      |      |
|---------|------|------|------|------|------|
| Pb1     | 0.4  | NA   | NA   | NA   | NA   |
| Pbdc1   | NA   | NA   | 0.18 | 1.75 | NA   |
| Pbef1   | 0.25 | NA   | NA   | NA   | NA   |
| Pbk     | 0.48 | 0    | 3.02 | 1.32 | 1.13 |
| Pbld    | NA   | NA   | NA   | NA   | 0    |
| Pbrm1   | NA   | 1.3  | 2.58 | 0    | 0    |
| Pbx1    | 0.36 | 1.38 | 0.33 | 0    | 0    |
| Pbx2    | 0.22 | 0.7  | 0.68 | 2.7  | 0.54 |
| Pbx3    | 0    | 2.06 | 2.93 | 1.63 | 0    |
| Pbx4    | 0.09 | NA   | 0.51 | 1.24 | 5    |
| Pbxip1  | 0.02 | 0    | 1.54 | 0    | 4.92 |
| Pcaf    | 0.97 | NA   | NA   | NA   | NA   |
| Pcbd1   | NA   | 3.22 | 0    | 2.97 | 0.12 |
| Pcbd2   | NA   | NA   | 1.16 | 2.4  | 0.01 |
| Pcbp1   | 0.26 | 2.38 | 1.46 | 0.84 | 1.2  |
| Pcbp2   | 0    | 0    | 1.17 | 0.02 | 0    |
| Pcbp3   | 0    | 0.86 | 1.14 | 0    | 0    |
| Pcbp4   | 1.32 | 0    | 2.58 | 1.68 | 0    |
| Pcca    | 0    | 0.26 | 0.23 | 1.85 | 0.92 |
| Pccb    | 0.31 | 0.09 | 1.27 | 0.72 | 1.66 |
| Pcdh1   | NA   | 1.03 | 1.31 | 1.43 | 4.43 |
| Pcdh10  | 0.17 | NA   | 0.82 | 3.83 | 0    |
| Pcdh11x | 0    | 1.49 | 0.92 | NA   | 0    |
| Pcdh12  | 2.46 | 1.09 | 0.31 | 0.66 | 1.78 |
| Pcdh15  | 0.45 | NA   | 0.43 | 0.56 | NA   |
| Pcdh17  | NA   | 1.11 | 0    | 1.22 | 1.26 |
| Pcdh18  | 1.24 | NA   | 0.81 | 0.95 | 0    |
| Pcdh19  | NA   | NA   | 0.51 | 0.59 | 2.13 |
| Pcdh20  | 0    | NA   | 0.2  | 1.8  | 1.51 |
| Pcdh21  | 0    | NA   | NA   | NA   | NA   |
| Pcdh7   | 0.38 | 0.56 | 2.54 | 0    | 0    |
| Pcdh8   | 1.01 | 3.55 | 1.06 | 1.63 | 0    |
| Pcdh9   | 0.46 | 0.17 | 0.67 | 0    | 0.11 |
| Pcdha1  | 1.94 | NA   | NA   | NA   | NA   |
| Pcdha10 | 5.38 | 3.84 | 1.56 | NA   | 0    |
| Pcdha11 | 4.14 | NA   | NA   | NA   | NA   |
| Pcdha12 | 0.83 | NA   | NA   | NA   | NA   |
| Pcdha2  | 0.45 | NA   | NA   | NA   | NA   |
| Pcdha3  | 2.55 | NA   | NA   | NA   | NA   |
| Pcdha5  | 0    | NA   | NA   | NA   | NA   |
| Pcdha6  | 0.44 | NA   | NA   | NA   | NA   |

|          |       |      |      |      |      |
|----------|-------|------|------|------|------|
| Pcdha7   | 0.44  | NA   | NA   | NA   | NA   |
| Pcdha8   | 0     | NA   | NA   | NA   | NA   |
| Pcdhac1  | 1.22  | NA   | 1.05 | NA   | NA   |
| Pcdhac2  | 1.36  | NA   | 2.07 | NA   | NA   |
| Pcdhb1   | 1.94  | 1.7  | 0.98 | 1.46 | 2.28 |
| Pcdhb10  | 2.56  | NA   | 1.45 | 2.65 | 0    |
| Pcdhb11  | 1.32  | 0.07 | 0    | 0.91 | 0    |
| Pcdhb12  | 1.8   | 1.11 | 2.54 | 3.23 | 1.95 |
| Pcdhb13  | 0.35  | 0    | 2.9  | 2.27 | 4.56 |
| Pcdhb14  | 1.5   | NA   | 1.36 | 0.46 | 1.09 |
| Pcdhb15  | 1.4   | NA   | 0    | 4.07 | 2.12 |
| Pcdhb16  | 0.29  | NA   | 1.09 | 1.52 | 2.05 |
| Pcdhb17  | 13.37 | 0.67 | 0.26 | 1.11 | 4.72 |
| Pcdhb18  | 3.49  | NA   | 2.12 | 0.35 | 2.92 |
| Pcdhb2   | 0.44  | NA   | 3.37 | 4.78 | 0    |
| Pcdhb3   | 1.54  | 2.21 | 1.9  | 9.09 | 0    |
| Pcdhb4   | 4.64  | NA   | 0.58 | 3.69 | 0    |
| Pcdhb5   | 0.94  | NA   | 3.09 | 0    | 1.85 |
| Pcdhb6   | 0     | 0    | 0.57 | 4.42 | 6.97 |
| Pcdhb7   | 0     | NA   | 1.83 | 4.72 | 3.27 |
| Pcdhb8   | 0.73  | 0.9  | 2.29 | 0    | 0    |
| Pcdhb9   | 1.72  | NA   | 0.09 | 2.93 | 0    |
| Pcdhga1  | 0.91  | NA   | NA   | NA   | NA   |
| Pcdhga10 | 1.92  | NA   | NA   | NA   | NA   |
| Pcdhga2  | 0.72  | NA   | NA   | NA   | NA   |
| Pcdhga3  | 1.04  | NA   | NA   | NA   | NA   |
| Pcdhga4  | 0.78  | NA   | NA   | NA   | NA   |
| Pcdhga5  | 2.34  | NA   | NA   | NA   | NA   |
| Pcdhga6  | 1.13  | NA   | NA   | NA   | NA   |
| Pcdhga7  | 0.96  | NA   | NA   | NA   | NA   |
| Pcdhga8  | 0     | NA   | NA   | NA   | NA   |
| Pcdhga9  | 1.51  | NA   | NA   | NA   | NA   |
| Pcdhgb1  | 3.06  | NA   | NA   | NA   | NA   |
| Pcdhgb2  | 0.84  | NA   | NA   | NA   | NA   |
| Pcdhgb4  | 0.1   | NA   | NA   | NA   | NA   |
| Pcdhgb5  | 1.77  | NA   | NA   | NA   | NA   |
| Pcdhgb6  | 0.72  | NA   | NA   | NA   | NA   |
| Pcdhgb7  | 0     | NA   | NA   | NA   | NA   |
| Pcdhgc3  | 0     | NA   | NA   | NA   | NA   |
| Pcdhgc4  | 0     | NA   | 3.41 | NA   | 2.45 |
| Pcdhgc5  | 0.47  | NA   | NA   | NA   | NA   |

|         |      |      |      |      |      |
|---------|------|------|------|------|------|
| Pced1a  | NA   | NA   | 0.73 | 2.12 | NA   |
| Pced1b  | NA   | NA   | 0    | 0    | NA   |
| Pcf11   | NA   | 0.56 | 1.83 | 0    | 1.71 |
| Pcgf1   | NA   | 0.6  | 0.87 | 0.34 | 0    |
| Pcgf2   | NA   | 0.75 | 1.32 | 0.01 | 0    |
| Pcgf3   | NA   | 0.87 | 0.31 | 0.71 | 0.38 |
| Pcgf5   | NA   | NA   | 1.63 | 1.72 | 1.93 |
| Pcgf6   | NA   | NA   | 1.71 | 1.1  | 3.91 |
| Pcid2   | NA   | 2.57 | 0.17 | 0.32 | 0    |
| Pcif1   | NA   | 1.36 | 1.85 | 1.81 | 0.31 |
| Pck1    | 0.49 | 2.03 | 1.65 | 0.72 | 1.25 |
| Pck2    | NA   | 1.03 | 3.12 | 0.6  | 0    |
| Pclo    | NA   | 0.81 | 0.49 | 1.26 | 2.33 |
| Pcm1    | 0.64 | 0.01 | 1.41 | 0.16 | 1.26 |
| Pcmt1   | 0    | 1.83 | 1.58 | 0.45 | 0.57 |
| Pcmtd1  | NA   | NA   | 1.34 | 0.66 | 0    |
| Pcmtd2  | NA   | 0    | 1.73 | 2.58 | 2.46 |
| Pcna    | 0    | 0.14 | 0.68 | NA   | 0    |
| Pcnp    | 0.69 | 1.91 | 3.87 | 1.65 | 0    |
| Pcnt    | NA   | 0    | 1.96 | 0    | 0.6  |
| Pcnx    | 0.43 | 0    | 1.71 | 1.49 | 0    |
| Pcnx12  | NA   | 0    | 0.41 | 0.01 | 0.66 |
| Pcnx13  | 0.75 | NA   | 2.4  | 1.4  | 2.66 |
| Pcnx14  | NA   | 0.17 | 0.78 | 2.98 | NA   |
| Pcolce  | 0    | 1.37 | 0.82 | 1.42 | 0.66 |
| Pcolce2 | 0    | 0    | 1.3  | 2.05 | 2.08 |
| Pcoln3  | 1.05 | NA   | NA   | NA   | NA   |
| Pcp2    | 0.63 | NA   | 1.46 | NA   | 0.01 |
| Pcp4    | 0.78 | 1.39 | 1.59 | 3.02 | 0    |
| Pcp411  | 2.05 | NA   | 0.84 | 0    | 1.2  |
| Pcqap   | 1.58 | NA   | NA   | NA   | NA   |
| Pcsk1   | 0.4  | 0.77 | 1.46 | 3.67 | 0.07 |
| Pcsk1n  | 0.03 | 0.63 | 0.84 | 1.05 | 0    |
| Pcsk2   | 0.66 | 0.83 | 0.59 | 1.31 | 0    |
| Pcsk4   | 0    | NA   | 2.46 | 1.05 | 0    |
| Pcsk5   | 0.82 | 1.35 | 0.45 | 0    | 2.17 |
| Pcsk6   | NA   | 1.12 | 1.55 | 4.59 | 2.39 |
| Pcsk7   | 0.74 | 0    | 1.79 | 1.56 | 3.36 |
| Pcsk9   | 0    | NA   | 1.04 | 1.53 | 4.12 |
| Pctk1   | 1.51 | NA   | NA   | NA   | NA   |
| Pctk2   | 7.76 | NA   | NA   | NA   | NA   |

|           |      |      |      |       |      |
|-----------|------|------|------|-------|------|
| Pctk3     | 0    | NA   | NA   | NA    | NA   |
| Pctp      | 0    | 2.24 | 0.28 | 0.56  | 2.52 |
| Pcyox1    | 0.37 | 0    | 0.4  | 0.07  | 0    |
| Pcyox11   | NA   | 0    | 0.44 | 1.7   | 5.19 |
| Pcyt1a    | 0.45 | 0    | 0.22 | 1.51  | 0    |
| Pcyt1b    | 3.78 | 1.39 | 0.86 | 0.9   | 1.07 |
| Pcyt2     | NA   | 0.12 | 3.18 | 0     | 1.1  |
| Pdap1     | 1.6  | 1.5  | 0.88 | 1.06  | 0.14 |
| Pdc       | 0.01 | 1.55 | 3.12 | 0.66  | 1.41 |
| Pdcd1     | 1.91 | 2.25 | 1.11 | 1.49  | 4.87 |
| Pdcd10    | 0.49 | 0    | 2.4  | 0.57  | 0.51 |
| Pdcd11    | 0.78 | 0.72 | 1.84 | 2.64  | 1.46 |
| Pdcd11lg2 | 0    | 1.09 | 1.68 | 11.26 | 2.93 |
| Pdcd2     | 0.26 | 0.19 | 1.03 | 0     | 0    |
| Pdcd2l    | NA   | NA   | 1.15 | 0.34  | 0    |
| Pdcd4     | 0.32 | 0    | 1.17 | 0.37  | 0    |
| Pdcd5     | 0.05 | 0    | 3.33 | 0.79  | 0    |
| Pdcd6     | 1.9  | 0.87 | 4.52 | NA    | 0.83 |
| Pdcd6ip   | 0.29 | 0    | 2.83 | 0.24  | 1.79 |
| Pdcd7     | 0    | NA   | 1.5  | 0     | 0.65 |
| Pdcl      | 1.07 | 0.55 | 1.15 | 0.7   | 0    |
| Pdcl2     | 0.58 | NA   | 3.95 | 0.78  | 0    |
| Pdcl3     | 0    | NA   | NA   | 0.53  | NA   |
| Pdde1     | NA   | NA   | 2.07 | 0     | 0    |
| Pde10a    | 0.49 | 0.56 | 1.36 | 2.37  | 1.18 |
| Pde11a    | 1.86 | 1.08 | 0.68 | 2.58  | 0    |
| Pde12     | NA   | 1.77 | 1.42 | 1.24  | 0.32 |
| Pde1a     | 0.3  | 0    | 0.03 | 1.77  | 0    |
| Pde1b     | 0.51 | 0    | 3.73 | 0.9   | 0    |
| Pde1c     | 0.49 | 0.93 | 0.97 | 2.15  | 0    |
| Pde2a     | 0.58 | 1.99 | 0.37 | 0     | 0.07 |
| Pde3a     | 1.3  | 1.46 | 0.36 | 1.88  | 0    |
| Pde3b     | 0    | 0    | 3.32 | 4.03  | 0.89 |
| Pde4a     | 0.32 | 1.4  | 1.2  | 0.54  | 0    |
| Pde4b     | 0    | 0.67 | 1.25 | 0.53  | 0    |
| Pde4c     | 0.59 | NA   | NA   | NA    | NA   |
| Pde4d     | 0.55 | 0.13 | 0.31 | 1.52  | 3.63 |
| Pde4dip   | NA   | 0    | 2.06 | 4.48  | 0    |
| Pde5a     | 0.71 | 1.39 | 2.05 | 0.04  | 0    |
| Pde6a     | 1.52 | 0.74 | 3.06 | 2.31  | 8.94 |
| Pde6b     | 2.11 | 0.74 | 0.41 | 0.91  | 0    |

|        |      |      |      |      |      |
|--------|------|------|------|------|------|
| Pde6c  | 1.21 | 0.3  | 2.47 | 0.19 | 0    |
| Pde6d  | 0.26 | 1.59 | 1.5  | 0.31 | 1.33 |
| Pde6g  | 1.08 | 1.24 | 0.11 | 0.9  | 0    |
| Pde6h  | 1.15 | 1.26 | 3.07 | 3.5  | 0    |
| Pde7a  | 0.76 | NA   | 1.87 | 0.02 | 0    |
| Pde7b  | 1.18 | 0.79 | 0.61 | 3.35 | 0.82 |
| Pde8a  | 2.05 | 1.66 | 0.74 | 1.92 | 1.59 |
| Pde8b  | 3.28 | 1    | 0.92 | 2.63 | 1.69 |
| Pde9a  | 0.44 | 0    | 0.68 | 0    | 1.73 |
| Pdgfa  | 0.5  | 1.3  | 3.11 | 4.54 | 0    |
| Pdgfb  | 0.27 | 0.78 | 0.77 | 0.7  | 2.57 |
| Pdgfc  | 1.21 | 0.37 | 2.93 | 2.36 | 0    |
| Pdgfd  | 0.21 | 0.15 | 0.68 | 2.41 | 1.62 |
| Pdgfra | 1.08 | 0.51 | 1.11 | 2.13 | 1.05 |
| Pdgfrb | 0.54 | 1.41 | 2.36 | 1.67 | 0.56 |
| Pdgfrl | 0.76 | 2.67 | 0.35 | 0.41 | 0    |
| Pdha1  | 0.02 | 1.28 | 2.45 | NA   | 1.69 |
| Pdha2  | 0    | 1.67 | 0.48 | 0.06 | 0    |
| Pdhb   | 0.44 | 0    | 1.65 | 0    | NA   |
| Pdhx   | 0    | 1.67 | 2    | 0.22 | 4.2  |
| Pdia2  | NA   | 0.4  | 0.02 | 1.01 | 5.72 |
| Pdia3  | NA   | 1.61 | 0.88 | 1.66 | 3.13 |
| Pdia4  | NA   | 1.66 | 3.17 | NA   | 0    |
| Pdia5  | NA   | 0    | 1.47 | 0    | 2.41 |
| Pdia6  | NA   | 0.86 | 1.19 | 1.58 | 0    |
| Pdik11 | NA   | NA   | 1.19 | 3.7  | 0    |
| Pdilt  | NA   | NA   | 1.42 | 3.68 | NA   |
| Pdk1   | 1.66 | 1.75 | 0.09 | 0.77 | 1.03 |
| Pdk2   | 0    | 0.35 | 0.55 | 0.85 | 1.42 |
| Pdk3   | 0.65 | 0.09 | 3.53 | 0    | 0    |
| Pdk4   | 1.16 | 0.82 | 2.32 | 0.82 | 0    |
| Pdlim1 | 0.47 | 0    | 1.1  | 0    | NA   |
| Pdlim2 | 1.16 | 3.76 | 2.55 | 0.7  | 0.45 |
| Pdlim3 | 4.69 | 1.43 | 1.37 | 2.33 | 0    |
| Pdlim4 | 0.55 | 1.07 | 1.75 | 0    | 3.9  |
| Pdlim5 | NA   | 0.24 | 0.64 | 4.08 | 0    |
| Pdlim7 | 0.66 | 1.98 | 1.86 | 2.16 | 0    |
| Pdp1   | NA   | 1.4  | 1.68 | 0    | 0    |
| Pdp2   | NA   | NA   | 3.46 | 2.58 | 0.66 |
| Pdpk1  | 0.78 | 0.78 | 0.52 | 0.16 | 1.54 |
| Pdpn   | NA   | 0.79 | 1.42 | 6.05 | 0    |

|          |      |      |      |      |      |
|----------|------|------|------|------|------|
| Pdpr     | NA   | 1.1  | 1.42 | 0.56 | NA   |
| Pdrg1    | 0.31 | NA   | 0.98 | 1.78 | 0    |
| Pds5a    | NA   | 0    | 1.44 | 0    | 1.83 |
| Pds5b    | NA   | 2.05 | 0.69 | 0    | 0.03 |
| Pdss1    | NA   | 0    | 1.09 | 1.03 | 0    |
| Pdss2    | NA   | 0.44 | 0.36 | 1.87 | 0    |
| Pdx1     | NA   | 1.13 | 1.07 | 1.45 | 1.78 |
| Pdxdc1   | NA   | 0    | 0.03 | 0.1  | 0    |
| Pdxk     | 0    | 0.21 | 1.02 | 0.03 | 0    |
| Pdyp     | 0    | NA   | 1.02 | 2.95 | 0.57 |
| Pdyn     | 0.69 | 1.47 | 0.96 | 0.69 | 4.32 |
| Pdzd11   | NA   | NA   | 0.32 | 1.68 | 0    |
| Pdzd2    | NA   | 0.82 | 0.7  | 0    | 0.71 |
| Pdzd3    | NA   | 1.5  | 0.65 | 1.55 | 0    |
| Pdzd4    | NA   | NA   | 0.78 | 0    | 0.7  |
| Pdzd7    | NA   | NA   | NA   | 1.08 | NA   |
| Pdzd8    | NA   | 0.14 | 1.11 | 0    | 1.2  |
| Pdzd9    | NA   | NA   | 0.7  | 0.1  | NA   |
| Pdzk1    | 0    | 2.09 | 0.8  | NA   | 2.11 |
| Pdzk1ip1 | NA   | 0.37 | 2.55 | 0.77 | 0    |
| Pdzrn3   | 2.9  | 0    | 1.55 | 0.84 | 0    |
| Pdzrn4   | NA   | 1.13 | 0    | 1.14 | 0    |
| Pea15    | 0.52 | NA   | NA   | NA   | NA   |
| Pear1    | NA   | NA   | 0.03 | 2.03 | 1.42 |
| Pebp1    | NA   | 1.04 | 0.36 | 0.68 | 0    |
| Pebp4    | NA   | NA   | 0.8  | 2.02 | 0    |
| Pecam1   | 0    | 0    | 0    | 1.59 | 4.4  |
| Peci     | 0    | NA   | NA   | NA   | 5.51 |
| Pecr     | 0    | 2.39 | 2.14 | 0.87 | 3.14 |
| Pefl     | NA   | 3.9  | 1.49 | 1.78 | 0    |
| Peg10    | 0.25 | 1.15 | 0.28 | 0.62 | 0    |
| Peg3     | 0    | 0.48 | 0.28 | NA   | 1.86 |
| Peli1    | 0.33 | 1.34 | 2.85 | 0.52 | 0    |
| Peli2    | 0    | 1.27 | 0.12 | 2.21 | 2.7  |
| Peli3    | NA   | NA   | NA   | 0.25 | NA   |
| Pelo     | 0.12 | 1.25 | 1.04 | 0    | 1.43 |
| Pelp1    | NA   | 0    | 2.96 | 1.99 | 1.71 |
| Pemt     | 0.47 | 0    | 0    | 0    | 0    |
| Penk     | NA   | 1.62 | 0.48 | 1.97 | 0    |
| Peo1     | 0    | NA   | NA   | NA   | NA   |
| Pepd     | NA   | 1.1  | 1.4  | 3.11 | 0    |

|         |       |      |      |      |      |
|---------|-------|------|------|------|------|
| Per1    | 0.6   | 1.7  | 0.49 | 0.05 | 0.11 |
| Per2    | 0.02  | 1    | 0.08 | NA   | 0    |
| Per3    | 0.03  | 0.28 | 0.64 | NA   | 0    |
| Perld1  | 0     | NA   | NA   | NA   | NA   |
| Perp    | 2.71  | 0    | 1.31 | 2.64 | 0.48 |
| Perq1   | 0     | NA   | NA   | NA   | NA   |
| Pes1    | 0.48  | 1.87 | 2.2  | 0.91 | 0    |
| Pet100  | NA    | NA   | 2.2  | NA   | NA   |
| Pet112  | NA    | 1.65 | 0.08 | 0.8  | NA   |
| Pet112l | 0     | NA   | NA   | NA   | 1.85 |
| Pet117  | NA    | NA   | NA   | 1.96 | NA   |
| Pex1    | 1.64  | 0.5  | 1.64 | 1.42 | 1.84 |
| Pex10   | NA    | 0.32 | 0.72 | NA   | 0.1  |
| Pex11a  | 0.49  | 0.97 | 0.37 | 1.58 | 0    |
| Pex11b  | 0.2   | 0.21 | 1.12 | 2.8  | 2.91 |
| Pex11g  | NA    | NA   | 4.1  | 4.6  | NA   |
| Pex12   | 3.16  | 1.34 | 2.43 | 1.71 | 0    |
| Pex13   | 0.68  | 0    | 1.6  | 0    | 0    |
| Pex14   | 0.81  | 0    | 1.23 | 1.21 | 0    |
| Pex16   | 2.32  | 0.61 | 0.53 | 0    | 0.56 |
| Pex19   | 0.44  | 1.14 | 0.41 | 0.8  | 0    |
| Pex2    | NA    | 0.02 | 1.59 | 0    | NA   |
| Pex26   | NA    | 0.13 | 5.11 | 2.67 | 0.69 |
| Pex3    | 0.87  | 0    | 0.03 | 0.62 | 1.18 |
| Pex5    | 0     | 0    | 0.47 | 0.84 | 3.08 |
| Pex5l   | NA    | 1.07 | 0.57 | 3.06 | 0.88 |
| Pex6    | 0.32  | 2.14 | 0.78 | 0.15 | 0.65 |
| Pex7    | 0     | 2.29 | 1.85 | 1.52 | 2.08 |
| Pf4     | NA    | 0.88 | 2.66 | 2.86 | 0.31 |
| Pfas    | NA    | 0    | 0    | 2.14 | 0    |
| Pfdn1   | 24.74 | 0.61 | 3.2  | 0.13 | 0    |
| Pfdn2   | 1.46  | 0.45 | 8.21 | 0.81 | 0    |
| Pfdn4   | 0.42  | 0.52 | 1.09 | 0.3  | 0    |
| Pfdn5   | 1.06  | 1.54 | 1    | 2.66 | 1.88 |
| Pfkfb1  | 2.9   | 1.4  | 2.95 | 1.67 | 1.83 |
| Pfkfb2  | 0     | 1.55 | 0.42 | 0.44 | 3.23 |
| Pfkfb3  | 0.15  | 0    | 1.7  | 0    | 0    |
| Pfkfb4  | NA    | 0.05 | 0.95 | 0.82 | 0    |
| Pfkl    | 0.93  | 1.33 | 0.49 | 0.76 | 1.62 |
| Pfkm    | 0     | 1.46 | 2.08 | 0    | 1.7  |
| Pfkp    | 0     | 1.36 | 1.2  | 0.2  | 1.44 |

|         |      |      |      |      |       |
|---------|------|------|------|------|-------|
| Pfn1    | 0    | 2.28 | 1.1  | 1    | 0     |
| Pfn2    | 0.28 | 0    | 2.57 | 0.83 | 0.7   |
| Pfn3    | 2.62 | NA   | NA   | NA   | NA    |
| Pfn4    | 4.36 | NA   | 0.16 | 0.53 | 0     |
| Pfk1    | 0.46 | NA   | NA   | NA   | NA    |
| Pga5    | 0    | NA   | NA   | NA   | NA    |
| Pgam1   | NA   | 1.28 | 2.15 | NA   | 0     |
| Pgam2   | 1.68 | 0.57 | 0.06 | 0    | 1.26  |
| Pgam5   | NA   | NA   | 0.79 | 0.63 | NA    |
| Pgap1   | NA   | 1.65 | 0.75 | 0    | 0.19  |
| Pgap2   | NA   | 2.23 | 0.32 | 0.66 | 0     |
| Pgap3   | NA   | 3.49 | 2.41 | 2.49 | 2.94  |
| Pgbd1   | NA   | NA   | 3.08 | 2.72 | 15.41 |
| Pgbd5   | 2.5  | 1.72 | 1.04 | 2.66 | 1.71  |
| Pgc     | 0    | 2.01 | 1.4  | 1.4  | 0     |
| Pgcp    | 3.19 | NA   | NA   | NA   | 2.55  |
| Pgd     | 0    | 0.36 | 2.17 | 0.21 | 0     |
| Pgf     | 0.35 | 0.87 | 2.65 | 2.1  | 3.83  |
| Pggt1b  | 2.69 | 0.63 | 1.59 | 0    | 0.55  |
| Pgk1    | 0.94 | 0    | 1.92 | 0.05 | 0     |
| Pgk2    | 2.78 | 0    | 2.19 | 2.42 | 0     |
| Pgls    | 0    | 1.59 | 1.96 | 0.37 | 0     |
| Pglyrp1 | 0.25 | 0.35 | 2.43 | 0.19 | 0     |
| Pglyrp2 | 0    | NA   | 1.7  | 1.31 | 1.6   |
| Pglyrp3 | 2.44 | NA   | NA   | 0.92 | NA    |
| Pglyrp4 | 0.57 | NA   | NA   | 1.07 | NA    |
| Pgm1    | 0    | 1.03 | 0    | 1.99 | 0     |
| Pgm2    | 0.51 | NA   | 0.77 | 0.21 | 1.2   |
| Pgm211  | 0.55 | NA   | 3.43 | 0    | 0     |
| Pgm3    | 0.2  | 1.73 | 2.64 | 0.19 | 0     |
| Pgm5    | 1.87 | 1.59 | 2.56 | 1.79 | NA    |
| Pgp     | NA   | 2    | 0.7  | 0.74 | 0.9   |
| Pgpep1  | 0.7  | 1.86 | 2.32 | 0.69 | 0     |
| Pgpep11 | NA   | NA   | NA   | 2.45 | NA    |
| Pgr     | 0.56 | 1.7  | 0.77 | 5.2  | 2.36  |
| Pgrmc1  | 0.42 | 0.25 | 2.78 | 1.49 | 1.85  |
| Pgrmc2  | 0.03 | 0    | 2.19 | 2.23 | 0     |
| Pgs1    | NA   | 0    | 1.87 | 2.42 | 0     |
| Phactr1 | NA   | 0.62 | 0.9  | 0.67 | 0     |
| Phactr2 | 0.04 | 0.12 | 0.97 | 1.42 | 0     |
| Phactr3 | 0.48 | NA   | 4.06 | 1.96 | 0.48  |



|         |      |      |      |      |      |
|---------|------|------|------|------|------|
| Phactr4 | 0.48 | 0    | 0.86 | 0.43 | 0    |
| Phax    | NA   | NA   | 1.69 | 2.51 | 0    |
| Phb     | 0    | 1.11 | 1.32 | 0.71 | 0.61 |
| Phb2    | NA   | 1.85 | 1.82 | 0.78 | 0    |
| Phc1    | 0.28 | 0    | 1.76 | NA   | 0    |
| Phc2    | 0.35 | 1.54 | 2.05 | 1.89 | 0    |
| Phc3    | 0    | 0.83 | 0.26 | 0.6  | 0    |
| Phca    | 0.06 | NA   | NA   | NA   | NA   |
| Phex    | 1.09 | 0.85 | 0.66 | 0.37 | 4.93 |
| Phf1    | 0    | 0    | 6.12 | 0.41 | 0    |
| Phf10   | 0.1  | 3.38 | 1.86 | 0.18 | 0    |
| Phf11   | 0.13 | NA   | NA   | NA   | NA   |
| Phf12   | 0.77 | NA   | 2.44 | 1.82 | 0    |
| Phf13   | 2.54 | NA   | 1.12 | 0.74 | 1.58 |
| Phf14   | NA   | 1.2  | 0.09 | 0.03 | 0.5  |
| Phf15   | 2.38 | 0    | 0.29 | 1.67 | 1.67 |
| Phf16   | 0    | 1.62 | 2.12 | 0.9  | 0    |
| Phf17   | 0.47 | 0    | 1.17 | 6.68 | 0    |
| Phf19   | 0.26 | NA   | 0.94 | 4.83 | 0    |
| Phf2    | 5.89 | 0    | 0.64 | 0.49 | 0.88 |
| Phf20   | NA   | 0.07 | 0.65 | 0    | 0    |
| Phf2011 | NA   | 1.71 | 1.11 | 0.84 | 1.36 |
| Phf21a  | NA   | 1.96 | 1.16 | 1.13 | 0    |
| Phf21b  | NA   | NA   | 1.89 | 1.42 | NA   |
| Phf23   | NA   | NA   | 1.21 | 1.3  | 1.21 |
| Phf3    | 0    | 0.24 | 0.94 | 0    | 1.07 |
| Phf5a   | 0.75 | NA   | 0.76 | 1.15 | 0    |
| Phf6    | 0.37 | NA   | 1.26 | 0.87 | 1.09 |
| Phf7    | 1.78 | 0.86 | 1.45 | 0.21 | 0    |
| Phf8    | NA   | 0.71 | 0.8  | 0    | 0    |
| Phgdh   | 0    | 0.79 | 2.34 | 0    | 0.53 |
| Phgdh11 | 0.02 | NA   | NA   | NA   | NA   |
| Phgr1   | NA   | NA   | 0    | NA   | NA   |
| Phip    | 0.48 | 0.21 | 0.53 | 0    | 0.05 |
| Phka1   | 0.6  | 1.78 | 2.22 | 0    | 1.78 |
| Phka2   | 0.49 | 1.8  | 0.92 | 0.03 | 1.27 |
| Phkb    | 0.37 | 0    | 2.44 | 3.73 | 0    |
| Phkg1   | 9.37 | 0.98 | 0.33 | 0    | 2.31 |
| Phkg2   | 0.36 | 0.05 | 0.03 | NA   | 1.12 |
| Phlda1  | 0.01 | 0.77 | 2.36 | 8.7  | 0    |
| Phlda2  | 0    | 3.44 | 3.64 | 0    | 9.63 |

|          |      |      |      |      |      |
|----------|------|------|------|------|------|
| Phlda3   | 0.45 | 3.16 | 0.64 | 3.27 | 0    |
| Phldb1   | NA   | 0.3  | 0.4  | 0.97 | 3.37 |
| Phldb2   | 1.5  | NA   | 0.54 | 4.73 | 0.89 |
| Phldb3   | NA   | NA   | NA   | 0.53 | NA   |
| Phlpp1   | NA   | 1.34 | 2    | 1.79 | 0    |
| Phlpp2   | NA   | 0    | 1.15 | NA   | 1.78 |
| Phospho1 | 0.3  | NA   | NA   | 1.4  | 2.63 |
| Phospho2 | NA   | NA   | 1.4  | 1.18 | 0    |
| Phox2a   | 0    | 1.07 | 0.33 | NA   | 0    |
| Phox2b   | 0    | 1.27 | 0.78 | 0.38 | 0    |
| Phpt1    | 0.28 | NA   | 2.58 | 0.7  | 0    |
| Phrf1    | NA   | NA   | 0.52 | 0    | 1.45 |
| Phtf1    | 0.93 | 5.01 | 0.69 | 0.61 | 2.52 |
| Phtf2    | 0    | 1.4  | 1.19 | 0.95 | 2.12 |
| Phyh     | 2.89 | 0    | 1.41 | 2.57 | 2.76 |
| Phyhd1   | NA   | NA   | 2.06 | 2.28 | 2.16 |
| Phyhip   | 0.41 | 2.08 | 2.05 | 7.11 | 0    |
| Phyhipl  | 0.5  | NA   | 0.8  | NA   | 0    |
| Pi15     | 0.29 | 1.57 | 2.19 | 1.31 | 1.75 |
| Pi16     | 0.31 | NA   | 1.31 | 1.76 | 0    |
| Pi4k2a   | NA   | 0.81 | 0.53 | 0    | 0.02 |
| Pi4k2b   | 0.63 | NA   | 1.16 | 0.7  | 1.64 |
| Pi4ka    | NA   | 0    | 0.77 | 0    | 0    |
| Pi4kb    | NA   | 0    | 0.42 | 0    | 0    |
| Pianp    | NA   | NA   | 1.03 | 2.87 | NA   |
| Pias1    | 0.62 | 1.09 | 0.74 | 0.58 | 0.65 |
| Pias2    | NA   | 0.23 | 0.39 | 0.47 | 0.36 |
| Pias3    | 0.52 | 0.91 | 0.94 | 1.47 | 3.73 |
| Pias4    | 0.61 | 0.81 | 0.78 | 4.16 | 0.96 |
| Pib5pa   | 1.76 | NA   | NA   | NA   | NA   |
| Pibf1    | NA   | 0.66 | 0.53 | NA   | 0    |
| Picalm   | 0.5  | 2.33 | 1.75 | 0.38 | 0    |
| Pick1    | NA   | 2.09 | 1.49 | 2.24 | 0.14 |
| Pid1     | NA   | 2    | 1.42 | 1.02 | 0.18 |
| Piezo1   | NA   | 3.06 | 3.44 | 0.8  | NA   |
| Piezo2   | NA   | 0.86 | 0.53 | 0.75 | NA   |
| Pif1     | NA   | NA   | 1.05 | 2.19 | 0.39 |
| Pifo     | NA   | NA   | NA   | 0    | NA   |
| Piga     | 0.4  | 0.21 | 1.03 | 1.16 | 1.15 |
| Pigb     | 0.84 | 0.73 | 0.5  | NA   | 6.08 |
| Pigc     | 1.9  | 0.54 | 1.4  | 0.9  | 0.69 |

|         |      |      |      |      |      |
|---------|------|------|------|------|------|
| Pigf    | 0    | 0    | 1.14 | NA   | 0    |
| Pigg    | NA   | 0    | 1.41 | 0    | 0.78 |
| Pigh    | 0    | 0.69 | 1.42 | NA   | 0    |
| Pigk    | 0.1  | 1.9  | 1.41 | 1.48 | 0    |
| Pigl    | 0    | 0    | 1.33 | 0.87 | 0    |
| Pigm    | 2.27 | NA   | 0    | 0    | 0    |
| Pign    | 0.03 | 0.7  | 1.17 | 0.02 | 0    |
| Pigo    | 0.23 | 0    | 2.41 | 0.21 | 0.13 |
| Pigp    | NA   | 0.28 | 1.99 | 0.88 | 0    |
| Pigq    | 0    | 1.24 | 1.95 | 1.41 | 1.45 |
| Pigr    | 0.33 | 0.33 | 1.25 | 0.17 | 1.17 |
| Pigs    | 0    | NA   | 0.2  | 0    | 0    |
| Pigt    | 0.67 | 1.19 | 1.14 | 0.98 | 0    |
| Pigu    | NA   | NA   | 1.09 | 1.3  | 0    |
| Pigv    | NA   | 1.26 | 1.18 | 1.46 | 2.05 |
| Pigw    | 0.71 | NA   | NA   | 1.47 | NA   |
| Pigx    | NA   | NA   | 0.87 | 0.39 | 0.75 |
| Pigy    | NA   | NA   | NA   | NA   | 0.58 |
| Pigz    | NA   | 1.28 | 1.28 | 2.21 | 0.14 |
| Pih1d1  | NA   | 1.69 | 1.9  | 3.85 | 2.43 |
| Pih1d2  | NA   | NA   | 0    | 0.62 | 0.09 |
| Pih1d3  | NA   | NA   | 1.46 | 0.53 | NA   |
| Pik3ap1 | 0.25 | NA   | 4.29 | 0.09 | 0.03 |
| Pik3c2a | 0.18 | 1.21 | 0.93 | 0.08 | 2.14 |
| Pik3c2b | NA   | NA   | NA   | 1.27 | NA   |
| Pik3c2g | 0.45 | 0.13 | 1.29 | 1.86 | 1.93 |
| Pik3c3  | 0.72 | 4.33 | 1.26 | 0    | 0    |
| Pik3ca  | 0.84 | 1.48 | 3.57 | 3.38 | 0    |
| Pik3cb  | 0.84 | 1.81 | 3.05 | 0    | 4.95 |
| Pik3cd  | 0.74 | 0.82 | 2.48 | 0.3  | 0.74 |
| Pik3cg  | 0.18 | 0    | 1.04 | 0.65 | 0    |
| Pik3ip1 | NA   | 0    | 1.29 | 3.63 | 2.67 |
| Pik3r1  | 0.28 | 0    | 3.97 | 0.91 | 0    |
| Pik3r2  | 0    | 2.18 | 1.4  | 1.19 | 3.27 |
| Pik3r3  | 1.09 | 0    | 0.1  | 0    | 1.74 |
| Pik3r4  | 0    | 0.74 | 0.9  | 1.64 | 0.7  |
| Pik3r5  | NA   | 2.08 | 2.58 | 1.03 | 0    |
| Pik3r6  | NA   | NA   | 3.2  | 2.02 | NA   |
| Pik4ca  | 1.31 | NA   | NA   | NA   | NA   |
| Pik4cb  | 0.69 | NA   | NA   | NA   | NA   |
| Pikfyve | NA   | 1.07 | 1.51 | 0    | 0    |

|         |      |      |      |      |      |
|---------|------|------|------|------|------|
| Pilra   | 0.59 | 4.47 | 3.24 | 0.77 | 0    |
| Pilrb   | 0.62 | NA   | NA   | NA   | NA   |
| Pim1    | 0.5  | 3.13 | 2.37 | 0    | 0    |
| Pim2    | 0    | 0.05 | 2.57 | 0    | 0    |
| Pim3    | 0.16 | NA   | 1.55 | 1.05 | 2.57 |
| Pin1    | 1.88 | 1.01 | 0.96 | 0    | 3.09 |
| Pin4    | 0.22 | 0.08 | 1.17 | 0.65 | 0    |
| Pink1   | 0    | 1.36 | 1.42 | 1.83 | NA   |
| Pinlyp  | NA   | 0.6  | 1.81 | 0.86 | NA   |
| Pinx1   | 0.35 | NA   | 4.76 | 1.86 | NA   |
| Pion    | NA   | NA   | NA   | NA   | 2.53 |
| Pip     | 2.16 | 2.46 | 1.48 | 0.78 | 1.66 |
| Pip4k2a | NA   | 0.45 | 1.07 | 0.4  | 0    |
| Pip4k2b | NA   | 0    | 0.42 | 1.72 | 0    |
| Pip4k2c | NA   | 0    | 1.19 | 1.37 | 0    |
| Pip5k1a | 0.01 | 0.07 | 0.8  | 0.81 | 0.66 |
| Pip5k1b | 1    | 1.27 | 0.62 | 0.78 | 0.11 |
| Pip5k1c | 0.48 | 1.23 | 0.79 | 0.37 | 0    |
| Pip5k2a | 0.84 | NA   | NA   | NA   | NA   |
| Pip5k2b | 0    | NA   | NA   | NA   | NA   |
| Pip5k2c | 0    | NA   | NA   | NA   | NA   |
| Pip5k3  | 0    | NA   | NA   | NA   | NA   |
| Pip5kl1 | 1.01 | NA   | 0.75 | 1.66 | 0    |
| Pipox   | 4.9  | 2.76 | 1.19 | 0.33 | 2.1  |
| Pir     | 0    | 2.31 | 2.29 | 2.78 | 1.72 |
| Pirt    | NA   | NA   | 0    | 4.83 | NA   |
| Pisd    | NA   | 1    | 1.51 | 1.21 | NA   |
| Pithd1  | NA   | NA   | 0.85 | 1.96 | NA   |
| Pitpna  | NA   | 1.17 | 0.58 | 0.02 | 1.24 |
| Pitpnb  | 0.61 | 1.46 | 1.23 | 0.75 | 0    |
| Pitpnc1 | 0.95 | 0    | 2.33 | 3.69 | 1.05 |
| Pitpnm1 | 0.39 | 0.88 | 2.61 | 1.6  | 0.85 |
| Pitpnm2 | 0    | NA   | 0    | 1.98 | 0.75 |
| Pitpnm3 | NA   | 0.85 | 0.72 | 0.11 | 0    |
| Pitrm1  | 0    | 0    | 0    | 0.18 | 0    |
| Pitx1   | 0    | 0.69 | 0.48 | 2.26 | 0    |
| Pitx2   | 0.4  | 1.3  | 1.99 | 0    | 1.11 |
| Pitx3   | 2.32 | 1.55 | 1.26 | 1.18 | 0    |
| Piwil1  | 7.46 | 4.46 | 0.75 | 1.55 | 0    |
| Piwil2  | 0.32 | 1.02 | 0    | 1.42 | 0    |
| Piwil4  | NA   | NA   | 2.17 | 1.45 | 0    |

|          |      |      |      |      |      |
|----------|------|------|------|------|------|
| Pja1     | 0.66 | 0    | 2.53 | 0.32 | 2.33 |
| Pja2     | 0.33 | 0.02 | 1.98 | 2.84 | 3    |
| Pkd1     | 1.6  | 1.16 | 2.07 | 0.91 | 0.82 |
| Pkd111   | 4.42 | NA   | NA   | 0.23 | NA   |
| Pkd112   | 0.72 | NA   | 3.1  | 3.01 | 3.53 |
| Pkd113   | 0.37 | NA   | NA   | 1.68 | NA   |
| Pkd2     | 1.5  | 2.17 | 1.36 | 2.34 | 0.3  |
| Pkd211   | NA   | 0    | 0    | 0.21 | 0.86 |
| Pkd212   | 0.33 | 1.39 | 0.47 | NA   | 0    |
| Pkdec    | NA   | NA   | 0.81 | 0.25 | NA   |
| Pkdrej   | 0    | 1.41 | 0.3  | 1.33 | 1.61 |
| Pkhd1    | 0.43 | NA   | 2.14 | 3.1  | 0    |
| Pkhd111  | 1.45 | NA   | 1.09 | 0    | NA   |
| Pkia     | 0.45 | 1.48 | 0.45 | 0.89 | 1.33 |
| Pkib     | 0.67 | NA   | 1.49 | 1.13 | 1.04 |
| Pkig     | 0.77 | 0.12 | 0    | 0.8  | 0    |
| Pklr     | 2.71 | 1.22 | 1    | 1.67 | 2.21 |
| Pkm      | NA   | 2.3  | 0.39 | 0.01 | NA   |
| Pkm2     | 0.99 | NA   | NA   | NA   | 0    |
| Pkmyt1   | NA   | 2.8  | 1.72 | 2.84 | 4.46 |
| Pkn1     | 0.29 | 1.08 | 3.4  | 0    | 2.62 |
| Pkn2     | 0    | 1.38 | 1.34 | 0.02 | 0    |
| Pkn3     | 0    | NA   | 1.09 | 0.61 | 0.25 |
| Pknox1   | 0.15 | 1.17 | 2.02 | 0    | 0    |
| Pknox2   | 0.73 | 0.29 | 1.54 | 1.24 | 2.53 |
| Pkp1     | 1.39 | 0.35 | 0    | 3.48 | 0    |
| Pkp2     | 0.65 | 0.43 | 4.6  | 0.3  | 0.37 |
| Pkp3     | 1.1  | 1.7  | 1.49 | 1.81 | 0    |
| Pkp4     | 1.09 | 0    | 1.77 | 2.63 | 4.27 |
| Pla1a    | 0.64 | 2.12 | 1.62 | 0.04 | 2.92 |
| Pla2g10  | 3.09 | 2.3  | 0.59 | 1.12 | 0    |
| Pla2g12a | 0    | 2.21 | 1.89 | 0.99 | 0.93 |
| Pla2g12b | 0    | NA   | 0    | 1.4  | 1.89 |
| Pla2g15  | NA   | 0    | 0.25 | 1.08 | 0    |
| Pla2g16  | NA   | 1.78 | 1.21 | 0.64 | 0    |
| Pla2g1b  | 0    | 0.09 | 0.22 | 1.55 | 0    |
| Pla2g2a  | 1.43 | 0.97 | 0.68 | 0.14 | 0    |
| Pla2g2c  | NA   | NA   | NA   | 2.31 | NA   |
| Pla2g2d  | 0.74 | 0.24 | 0    | 0.66 | 2.53 |
| Pla2g2e  | 0.92 | 1.04 | 1.73 | 1.06 | 9.24 |
| Pla2g2f  | 1.11 | 1.62 | 0    | 1.01 | 2.6  |

|         |      |      |      |      |       |
|---------|------|------|------|------|-------|
| Pla2g3  | 1.65 | 0.59 | 1.56 | 0    | 0     |
| Pla2g4a | 0    | 0    | 2.93 | 2.08 | 0     |
| Pla2g4b | 0    | 0    | 0.66 | NA   | NA    |
| Pla2g4c | NA   | 1.54 | 0.71 | 0    | 1.84  |
| Pla2g4d | NA   | NA   | 0.95 | 1.45 | NA    |
| Pla2g4f | NA   | NA   | 0    | 4.49 | 16.86 |
| Pla2g5  | 7.95 | 1.35 | 2.3  | 2.04 | 5.5   |
| Pla2g6  | 1.37 | 0.58 | 0.49 | 0.88 | 0     |
| Pla2g7  | 0.49 | 3.08 | 2.1  | NA   | 0     |
| Pla2r1  | NA   | 1.6  | 0.45 | 0.18 | 1.24  |
| Plaa    | 0    | 0.55 | 1.08 | 0.5  | 0     |
| Plac1   | 2.64 | 0.73 | 0.8  | 2.13 | 3.37  |
| Plac11  | NA   | NA   | 0.1  | 0.6  | NA    |
| Plac8   | 0    | 0    | 1.26 | 0.88 | 0     |
| Plac8l1 | NA   | NA   | 0    | 0    | 0.94  |
| Plac9   | 0.25 | NA   | NA   | NA   | NA    |
| Plag1   | 0.38 | 1.03 | 2.02 | 1.05 | 1.53  |
| Plagl1  | 0.06 | 1.04 | 1.43 | NA   | 0.85  |
| Plagl2  | 0    | 0.76 | 1.08 | 1.61 | 0     |
| Plat    | 0    | 0.71 | 1.07 | 0.84 | 2.36  |
| Plau    | 0.33 | 0.2  | 1.68 | 1.42 | 0     |
| Plaur   | 0.14 | 0.79 | 4.1  | 0.06 | 0     |
| Plb1    | NA   | NA   | 0.81 | 1.27 | 0.3   |
| Plbd1   | NA   | 0    | 0.98 | 2.36 | NA    |
| Plbd2   | NA   | NA   | 0.71 | 0    | 1.97  |
| Plcb1   | 0.33 | 0    | 0.27 | 2.12 | 1.2   |
| Plcb2   | 2.71 | 2.08 | 1.66 | 2.22 | 0     |
| Plcb3   | 0.69 | 1.1  | 1.6  | 1.38 | 0     |
| Plcb4   | 2.05 | 0.84 | 0.48 | 1.82 | 0.04  |
| Plcd1   | 0    | 0    | 2.2  | 0.22 | 0     |
| Plcd3   | 0    | NA   | 1.97 | 2.37 | 0     |
| Plcd4   | 0    | NA   | 0.01 | NA   | 3.65  |
| Plce1   | 2.9  | 0.34 | 1.48 | 0.58 | 2.61  |
| Plcg1   | 0    | 0    | 0.01 | 0    | 0.84  |
| Plcg2   | 0.31 | 2.61 | 2.27 | 1.24 | 0.32  |
| Plch1   | NA   | 0    | 0.74 | 2.34 | 0     |
| Plch2   | NA   | 0.78 | 1.19 | 2.24 | 0     |
| Plcl1   | 2.22 | 1.18 | 0.18 | 2.5  | 0.72  |
| Plcl2   | 1.04 | 0.54 | 1.55 | 0.62 | 2.27  |
| Plcxd1  | NA   | 0    | 0.8  | 0.94 | 1.15  |
| Plcxd2  | NA   | NA   | 0.87 | 1.47 | 3.75  |

|          |      |      |      |       |      |
|----------|------|------|------|-------|------|
| Plcxd3   | 0    | NA   | 1.93 | 3.13  | 2.24 |
| Plcz1    | 0.05 | NA   | 1.44 | 1.91  | 0.95 |
| Pld1     | 0    | 0.18 | 1.54 | 1.1   | 0    |
| Pld2     | 0.83 | 1.42 | 4.6  | 0     | 2.61 |
| Pld3     | 0.41 | 0    | 0.66 | 0     | 4.66 |
| Pld4     | NA   | NA   | 1.32 | 1.72  | 0    |
| Pld5     | NA   | NA   | NA   | 0.57  | NA   |
| Pld6     | NA   | NA   | 1.37 | 1.25  | 1.64 |
| Pldn     | 0.21 | NA   | NA   | NA    | 3.37 |
| Plec     | NA   | 0.74 | 1.17 | 0     | NA   |
| Plec1    | 0.3  | NA   | NA   | NA    | NA   |
| Plek     | 0.26 | 0.97 | 0.64 | 1.43  | 0    |
| Plek2    | 1.45 | 1.61 | 1.78 | 3.76  | 0    |
| Plekha1  | NA   | 1.56 | 1.45 | 1.13  | 3.81 |
| Plekha2  | 0.52 | 1.83 | 1.19 | 0.75  | 0    |
| Plekha3  | 4.08 | NA   | 3.23 | 1.02  | 0.05 |
| Plekha4  | 0    | 1.4  | 0.94 | 1.31  | 0    |
| Plekha5  | 0.78 | 0.82 | 1.49 | 0     | 0.54 |
| Plekha6  | 0.55 | 0.39 | 2.72 | 1.22  | 1.17 |
| Plekha7  | 0    | NA   | 0.93 | 0     | 1.36 |
| Plekha8  | NA   | NA   | 1.53 | 0.83  | 0    |
| Plekha9  | 0.5  | 1.06 | 1.52 | 3.35  | 2.34 |
| Plekha10 | 0    | 0.53 | 0.92 | 0     | 1.22 |
| Plekha11 | 0    | NA   | NA   | NA    | NA   |
| Plekha12 | NA   | NA   | NA   | 1.93  | NA   |
| Plekha13 | 0    | 0    | 4.15 | 0     | 0    |
| Plekha14 | 0    | 1.45 | 0.74 | 5.6   | 2.57 |
| Plekha15 | 1.21 | NA   | 0.81 | 0     | 4.81 |
| Plekha16 | NA   | NA   | 1.19 | 0.07  | 0    |
| Plekha17 | NA   | 0.98 | 1.66 | 1.75  | 0.05 |
| Plekha18 | NA   | NA   | 0    | 2.28  | 0    |
| Plekha19 | NA   | NA   | 0.34 | 0.42  | 1.23 |
| Plekha20 | NA   | 1.11 | 2.13 | 0     | 0    |
| Plekha21 | 0.42 | NA   | 0.99 | 0.13  | 0.58 |
| Plekha22 | 4.22 | NA   | 0.71 | 0     | 2.06 |
| Plekha23 | NA   | 3.11 | 2.59 | 1.27  | 0    |
| Plekha24 | 0.01 | 1.85 | 1.18 | 16.67 | 1.87 |
| Plekha25 | 2.45 | NA   | NA   | NA    | NA   |
| Plekha26 | 0.19 | 1.06 | 1.29 | 1.39  | 0    |
| Plekha27 | 0.78 | 0.75 | 1.77 | 1.28  | 0    |
| Plekha28 | NA   | NA   | 1.08 | 1.06  | 3.62 |

|         |      |      |      |      |      |
|---------|------|------|------|------|------|
| Plekhn1 | NA   | NA   | 0.39 | 6.38 | 0    |
| Plekho1 | NA   | 0.05 | 0.62 | 3.29 | 0    |
| Plekho2 | NA   | 0    | 0.21 | 1.93 | 0    |
| Plekhs1 | NA   | 2.31 | 2.39 | 0.37 | NA   |
| Plg     | 0.16 | 1.04 | 0.6  | 0    | 2.72 |
| Plgrkt  | NA   | 1.28 | 2.29 | 0.87 | NA   |
| Plin    | 3.08 | NA   | NA   | NA   | NA   |
| Plin1   | NA   | NA   | NA   | 2.17 | NA   |
| Plin2   | NA   | 0.85 | 0.93 | 1.48 | 0    |
| Plin3   | NA   | 2.1  | 1.56 | 0.52 | 0    |
| Plin4   | NA   | NA   | 1    | 1.59 | 0    |
| Plin5   | NA   | NA   | 1.07 | NA   | 0    |
| Plk1    | 0.17 | 1.18 | 2.89 | 0    | 0    |
| Plk1s1  | NA   | 0    | 0.54 | 2.06 | NA   |
| Plk2    | 0.84 | 0    | 1.34 | 0    | 0    |
| Plk3    | 0.82 | 0.23 | 1.21 | NA   | 0    |
| Plk4    | 0    | 0    | 0.86 | 0.71 | 0    |
| Plk5    | NA   | NA   | 0.85 | NA   | NA   |
| Pllp    | NA   | 0.84 | 1.19 | 0.56 | 5.93 |
| Pln     | 6.06 | 0.67 | 1.47 | 8.26 | 2.52 |
| Plod1   | 0.12 | 0    | 2.52 | 1.81 | 1.56 |
| Plod2   | 0    | 0    | 1.96 | 1.53 | 2.6  |
| Plod3   | 1.14 | 3.19 | 0.89 | 0.52 | 0    |
| Plp1    | NA   | 2.19 | 0.52 | 0.95 | 0    |
| Plp2    | 0.06 | 0.55 | 1.4  | 0    | 0    |
| Plrg1   | 0.29 | NA   | 1.24 | 0    | 3.14 |
| Pls1    | NA   | 2.01 | 0.67 | 0.9  | 0    |
| Pls3    | 0.81 | 0.21 | 2.19 | 0.23 | 1.59 |
| Plscr1  | 0.59 | 0.1  | 2.2  | 0    | 0    |
| Plscr2  | 1.34 | 0.44 | 1.23 | 0.07 | 0    |
| Plscr3  | 7.7  | 2.06 | 0.88 | NA   | 0    |
| Plscr4  | 0.77 | 1.23 | 2.82 | 0.79 | 0    |
| Pltp    | 1.01 | 1.27 | 0.27 | NA   | 7.4  |
| Plunc   | 0    | NA   | NA   | NA   | 2.79 |
| Plvap   | 0.63 | 0    | 1.05 | 0.78 | 0    |
| Plxdc1  | 2.11 | 2.8  | 0.65 | 2.13 | 0.35 |
| Plxdc2  | 1.96 | NA   | 2.42 | 0    | 2.89 |
| Plxna1  | 0    | 0.56 | 0.44 | 1.59 | 0.67 |
| Plxna2  | 0.56 | 0.68 | 2.33 | 3.6  | 1.39 |
| Plxna3  | 0.89 | 2.19 | 0.71 | 0.27 | 1.32 |
| Plxna4  | NA   | NA   | 2.31 | 0    | 0    |



|          |      |      |      |      |      |
|----------|------|------|------|------|------|
| Plxnb1   | 2.36 | 0.82 | 0.17 | 0    | 0    |
| Plxnb2   | 0.56 | 0.63 | 1.72 | 1.17 | 1.58 |
| Plxnb3   | 2.06 | 1.89 | 2.74 | 1.29 | 0    |
| Plxnc1   | 1.32 | 0.05 | 4.24 | 1.2  | 0.1  |
| Plxnd1   | 0.49 | 0    | 0.78 | 0    | 0    |
| Pm20d1   | NA   | NA   | 2.17 | 0    | 0.79 |
| Pm20d2   | NA   | NA   | 1.53 | 0    | NA   |
| Pmaip1   | 0.75 | 0.53 | 3.73 | 1.75 | 3.17 |
| Pmch     | NA   | 0.17 | 2.39 | NA   | 0    |
| Pmel     | NA   | 3.6  | 0.13 | 0.17 | NA   |
| Pmepa1   | NA   | 1.54 | 2.42 | 2.35 | 0    |
| Pmf1     | 0.51 | 1.07 | 1.31 | 0.37 | 0    |
| Pmfbp1   | 2.78 | 0.09 | 0.06 | 0.75 | 2.92 |
| Pml      | 0.34 | 1.38 | 0.44 | 0    | 0    |
| Pmm1     | 0    | 1.33 | 1.39 | 0.53 | 2.9  |
| Pmm2     | 0    | 0.56 | 0.02 | 0.4  | 0    |
| Pmp2     | NA   | 3.02 | 1.39 | 2.38 | 0    |
| Pmp22    | 0.32 | 0.22 | 0.65 | 2.28 | 0.65 |
| Pmpca    | 0.16 | 2.92 | 1.95 | 0.07 | 2.23 |
| Pmpcb    | 3.4  | 1.96 | 1.68 | 0.63 | 2.44 |
| Pms1     | 0    | 0    | 1.3  | 0.47 | 0    |
| Pms2     | 0.56 | NA   | NA   | 0.76 | NA   |
| Pmvk     | 0.05 | 1.9  | 2.9  | 1.76 | 0    |
| Pnck     | 5.98 | NA   | 0.66 | 1.21 | 1.75 |
| Pnkd     | NA   | NA   | 0.48 | 0.13 | 0.55 |
| Pnkp     | 0    | 2.74 | 2.16 | 0    | 2.61 |
| Pnlde1   | NA   | NA   | 0.49 | 0.02 | NA   |
| Pnlip    | 0.82 | 0    | 0.33 | 4.28 | 1.7  |
| Pnliprp1 | 2.59 | 2.77 | 1.28 | 1.23 | 3.47 |
| Pnliprp2 | 0    | 1.12 | 0.93 | 0.44 | 2.99 |
| Pnma1    | 0    | 0    | 0.1  | 1.8  | 0    |
| Pnma2    | 2.03 | 0.42 | 0.31 | 1.28 | 2.61 |
| Pnma3    | 5.49 | 0    | 0.33 | 1.82 | 2    |
| Pnma5    | NA   | NA   | NA   | 5.59 | NA   |
| Pnmal1   | NA   | 1    | 1.01 | 0.98 | 0    |
| Pnmal2   | NA   | NA   | 1.45 | NA   | 2.35 |
| Pnmt     | 1.3  | 2.06 | 0.96 | 0.15 | 2.13 |
| Pnn      | 0.03 | 0.65 | 0    | 0.3  | 0    |
| Pno1     | NA   | 1.49 | 0.6  | 0.26 | 0    |
| Pnoc     | 0.7  | 2.68 | 2.19 | 2.23 | 5.47 |
| Pnp      | NA   | 0.38 | 0    | 3.55 | NA   |

|         |      |      |      |      |      |
|---------|------|------|------|------|------|
| Pnpla1  | NA   | NA   | 3.34 | 2.49 | NA   |
| Pnpla2  | 0.29 | 0.74 | 2.09 | 1.58 | 0.06 |
| Pnpla3  | NA   | 2.81 | 0    | 0    | 2.09 |
| Pnpla5  | 2.23 | NA   | 1.71 | 0.28 | 3.55 |
| Pnpla6  | NA   | 2.46 | 1.9  | 1.34 | 0.82 |
| Pnpla7  | NA   | NA   | 1.72 | 0.74 | 0    |
| Pnpla8  | NA   | NA   | 2.35 | 1.54 | 0    |
| Pnpo    | NA   | 0.12 | 2.92 | 0.85 | 0    |
| Pnpt1   | 0.3  | NA   | 2.23 | 0    | 0    |
| Pnrc1   | 0    | 1.42 | 1.15 | 1.71 | 0    |
| Pnrc2   | 0.54 | 0.28 | 0.99 | 0.06 | 0    |
| Poc1a   | NA   | NA   | 2    | 1.62 | NA   |
| Poc1b   | NA   | 3.27 | 2.2  | NA   | NA   |
| Poc5    | NA   | NA   | 0.82 | 0.63 | NA   |
| Podn    | 0.91 | NA   | 1.97 | 0.07 | 0    |
| Podn1   | NA   | NA   | NA   | 1.42 | NA   |
| Podxl   | 0.87 | 0.87 | 0.83 | 1.05 | 1.69 |
| Podxl2  | 0    | 0    | 1.09 | 0.43 | 2.36 |
| Pof1b   | 0.83 | 0.04 | 1.43 | 1.29 | 3.23 |
| Pofut1  | 0.42 | 1.16 | 2.33 | 0    | 0.73 |
| Pofut2  | 0.5  | 0.69 | 1.82 | 1.52 | 0    |
| Pogk    | 1.94 | 1.66 | 0.64 | 2.47 | 2.05 |
| Poglut1 | NA   | 0.82 | 0.83 | 1.29 | NA   |
| Pogz    | 0    | 0    | 4.47 | 1.72 | 0.85 |
| Pola1   | NA   | 0.89 | 2.33 | 0.17 | 1.55 |
| Pola2   | 0.22 | 0    | 1.39 | 2.37 | 0    |
| Polb    | 2.7  | 1.79 | 0.55 | 0.02 | 0.81 |
| Pold1   | 0.44 | 0.02 | 2.79 | 0    | 0    |
| Pold2   | 0.17 | 1.98 | 1.76 | 0.24 | 0    |
| Pold3   | 0.35 | 1.22 | 1.9  | 0.77 | 0    |
| Pold4   | 0    | 3.54 | 0.9  | 0.86 | 0    |
| Poldip2 | 0    | 2.58 | 0.17 | 1.04 | 0    |
| Poldip3 | 0    | 0.6  | 0.19 | 0    | 0.86 |
| Pole    | 0.19 | 1.75 | 3.25 | 0    | 0    |
| Pole2   | 0    | 0.1  | 0.97 | 0.86 | 0    |
| Pole3   | 0.05 | 1.12 | 1.86 | 1.62 | 0    |
| Pole4   | 0.05 | NA   | 1.29 | 1.15 | 1.48 |
| Polg    | 0    | 0    | 2.07 | NA   | 0.49 |
| Polg2   | 0.53 | 0.26 | 2.82 | 0    | 0    |
| Polh    | 1.13 | 0.95 | 1.43 | 0.11 | 0    |
| Poli    | 0    | 3.76 | 0.96 | 0.61 | 2.42 |

|           |      |      |      |      |       |
|-----------|------|------|------|------|-------|
| Polk      | 1.1  | NA   | 1.28 | 1.89 | 0     |
| Poll      | 0.27 | 0    | 3.48 | 0.64 | 0.94  |
| Polm      | 9.72 | 0    | 0.34 | 0.32 | 0.56  |
| Poln      | 2.76 | NA   | 1.29 | 1.86 | 1.43  |
| Polq      | 0    | 1.18 | 2.59 | 0.37 | 15.15 |
| Polr1a    | NA   | NA   | 0.52 | 3.02 | 1.38  |
| Polr1b    | NA   | 1.51 | 0.72 | 0.18 | 3.15  |
| Polr1c    | NA   | 0    | 1.4  | 0.74 | 1.77  |
| Polr1d    | NA   | 1.75 | 2.69 | 1.11 | 0     |
| Polr1e    | NA   | 0.89 | 1.9  | 0.8  | 0     |
| Polr2a    | 0.6  | 0.84 | 1.06 | 0    | 0     |
| Polr2b    | 2.08 | 0.83 | 3.07 | 0.64 | 3.24  |
| Polr2c    | 6.49 | 0.5  | 2.63 | 0.71 | 2.88  |
| Polr2d    | NA   | 1.61 | 0.12 | 1.27 | 8.97  |
| Polr2e    | 0    | 0    | 0.02 | 0.93 | 5.85  |
| Polr2f    | NA   | 0    | 0.28 | 0    | 0     |
| Polr2g    | 0.21 | 1.51 | 1.77 | 2.93 | 0     |
| Polr2h    | 1.14 | 2.09 | 2.46 | 0.32 | 4.58  |
| Polr2i    | 0.23 | 1.82 | 1.83 | 0    | 0     |
| Polr2j    | 0.32 | 0    | 1.63 | 0.06 | 0     |
| Polr2k    | 0.36 | 0.02 | 1.61 | 0    | 0     |
| Polr2l    | 0.08 | NA   | NA   | 0.8  | NA    |
| Polr2m    | NA   | NA   | 1.19 | 0.8  | NA    |
| Polr3a    | 0.27 | NA   | 1.65 | 4.93 | 0.28  |
| Polr3b    | 0    | 0    | 0.54 | 0.26 | 0     |
| Polr3c    | 1.99 | 0    | 0.02 | 0.59 | 4.29  |
| Polr3d    | 0.97 | 1.36 | 0.5  | 1.55 | 1.49  |
| Polr3e    | 0.45 | 1.68 | 0.55 | 1.68 | 0     |
| Polr3f    | 0.44 | 0.85 | 0.7  | NA   | 0     |
| Polr3g    | 0    | 1.25 | 0.34 | 0.11 | 0.56  |
| Polr3gl   | NA   | NA   | 1.78 | 0    | 0     |
| Polr3h    | 0    | NA   | 2.22 | 0    | 0.79  |
| Polr3k    | 0    | 0.52 | 0.89 | NA   | 0.19  |
| Polrmt    | 1.03 | 0.18 | 2.89 | 0.55 | 0     |
| Pols      | 0.84 | NA   | NA   | NA   | NA    |
| Pom121    | NA   | 1.4  | 5.22 | NA   | 0.03  |
| Pom121l12 | NA   | NA   | 2.04 | NA   | NA    |
| Pom121l2  | NA   | 1.87 | 2.08 | 0.8  | 3.27  |
| Pomc      | NA   | 2.65 | 4.26 | 0.88 | 1.95  |
| Pomgnt1   | NA   | 0.19 | 0.11 | 3.05 | 1.53  |
| Pomp      | NA   | 0    | 2.99 | 0    | 2.01  |

|          |      |      |      |      |      |
|----------|------|------|------|------|------|
| Pomt1    | 0.04 | 0    | 2.88 | 2.57 | 0    |
| Pomt2    | 0    | 2.35 | 0.6  | 0.75 | 2.4  |
| Pon1     | 1.38 | 1.47 | 1.01 | 0.75 | 2.79 |
| Pon2     | 0    | 0    | 0.83 | 0.32 | 0    |
| Pon3     | 3.54 | 2.22 | 1.02 | 1.64 | 1.85 |
| Pop1     | 0.58 | 1.89 | 0    | 1.32 | 0    |
| Pop4     | 0    | 0.45 | 1.3  | 0.52 | 2.27 |
| Pop5     | 0.68 | 0    | 0.97 | 2.98 | 2.09 |
| Pop7     | 2.79 | 1.36 | 2.44 | 0    | 0    |
| Popdc2   | 0.12 | 1.08 | 1.11 | 0    | 0    |
| Popdc3   | 3.64 | 2.64 | 3.43 | 1.33 | 3.71 |
| Por      | 0    | 0    | 2.96 | 2.05 | 0    |
| Poren    | 2.23 | 1.71 | 1.68 | 0    | 1.79 |
| Postn    | 0.51 | 0.59 | 1.21 | 1.34 | 0    |
| Pot1     | 0.12 | NA   | NA   | NA   | NA   |
| Pou1f1   | NA   | 0    | 1.23 | 0.95 | 0.1  |
| Pou2af1  | 0.23 | 0.04 | 2.57 | 2.18 | 2.28 |
| Pou2f1   | 0.48 | 1.6  | 0.63 | 2.99 | 0.62 |
| Pou2f2   | 0.18 | 1.71 | 2.36 | 2.12 | 0.3  |
| Pou2f3   | 1.07 | 1.45 | 1.55 | 1.23 | 7.13 |
| Pou3f1   | 1.83 | 0.04 | 3.39 | 2.89 | NA   |
| Pou3f2   | 0.06 | 1.63 | 0.73 | 1.17 | 5.3  |
| Pou3f3   | 0.24 | 1.38 | 3.38 | 5.16 | 0    |
| Pou3f4   | 0.42 | 1.51 | 2.93 | 2.54 | 0    |
| Pou4f1   | 0.11 | 0.48 | 1.29 | 0.07 | 0    |
| Pou4f2   | 0.11 | 2.5  | 1.06 | 0.68 | 2.49 |
| Pou4f3   | 1.03 | 2.13 | 0.99 | 1.66 | 0    |
| Pou5f1   | 0.33 | NA   | NA   | NA   | NA   |
| Pou5f2   | NA   | NA   | 0.35 | 0.58 | NA   |
| Pou6f1   | 1.2  | 0    | 0.88 | 2.45 | 1.55 |
| Pou6f2   | 3.34 | 1.98 | 1    | 1.59 | 0    |
| Pp2d1    | NA   | NA   | NA   | 1.03 | NA   |
| Ppa1     | NA   | 1.38 | 2.19 | 0    | 6.64 |
| Ppa2     | NA   | 4.08 | 2.61 | 0    | NA   |
| Ppan     | 0.24 | 1.22 | 1.75 | NA   | 0    |
| Ppap2a   | 0.88 | 1.53 | 1.28 | 0.58 | 1.7  |
| Ppap2b   | 0.21 | 1.93 | 2.3  | 1.08 | 1.3  |
| Ppap2c   | 1.5  | 0.95 | 2.42 | 6.2  | 1.45 |
| Ppapdc1a | NA   | NA   | 0    | 1.51 | 2.65 |
| Ppapdc1b | NA   | NA   | 1.57 | 0.18 | 7.05 |
| Ppapdc2  | NA   | NA   | 1.35 | NA   | 0    |

|          |       |      |      |      |      |
|----------|-------|------|------|------|------|
| Ppapdc3  | NA    | NA   | 1.68 | 0.89 | 0    |
| Ppara    | 5.83  | 1.8  | 0.63 | 0    | 0.49 |
| Pparbp   | 0.28  | NA   | NA   | NA   | NA   |
| Ppard    | 0.55  | 1.22 | 2.36 | 0    | 0.05 |
| Pparg    | 0.29  | 2.12 | 0.94 | 0.96 | 6.29 |
| Ppargc1a | 0.79  | 2.31 | 0.75 | 0    | 1.15 |
| Ppargc1b | 0.64  | NA   | 0.56 | 1.8  | NA   |
| Ppat     | 0     | 0    | 0.88 | 1.01 | 0.72 |
| Ppbp     | NA    | 1.23 | 1.27 | 5.68 | 0.41 |
| Ppcdc    | NA    | 2.19 | 0.52 | 0.69 | 0.93 |
| Ppcs     | NA    | 3.31 | 1.59 | 1.29 | 0    |
| Ppdpf    | NA    | 0.66 | 1.04 | 0    | 0    |
| Ppef1    | NA    | NA   | NA   | 2.79 | NA   |
| Ppef2    | 0.58  | 2    | 0.6  | 0.31 | 1.2  |
| Ppfia1   | 0.66  | 0.88 | 0.83 | 4.51 | 0.61 |
| Ppfia2   | NA    | 0.99 | 0.11 | 1.52 | 0    |
| Ppfia3   | NA    | 0    | 4.62 | 1.48 | 0    |
| Ppfia4   | 0     | 1.13 | 0.05 | 2.27 | 2.4  |
| Ppfibp1  | 0.65  | 0.66 | 0.06 | 0.71 | 0    |
| Ppfibp2  | 0.49  | 0.57 | 0.02 | 2.29 | 2.06 |
| Pphln1   | NA    | NA   | 0.89 | 0.66 | 1.42 |
| Ppia     | 0.08  | 1.51 | 1.48 | 0.1  | 0    |
| Ppib     | 0     | 1.97 | 6    | NA   | 0    |
| Ppic     | 0.01  | 0.98 | 1.6  | 0.31 | 1.84 |
| Ppid     | 1.23  | NA   | NA   | 0.78 | NA   |
| Ppie     | 12.66 | 1.34 | 1.57 | 1.68 | 4.32 |
| Ppif     | 0     | 0.06 | 1.83 | 1.1  | 2.31 |
| Ppig     | 0     | 0    | 0.82 | 0.75 | 1.03 |
| Ppih     | 0.2   | 0.98 | 1.54 | 1.13 | 0.21 |
| Ppil1    | 0.47  | NA   | 2.2  | 0.12 | 2.35 |
| Ppil2    | 0.47  | 0    | 0.43 | 0    | 1.64 |
| Ppil3    | 0     | 1.2  | 0.97 | 0.04 | 0    |
| Ppil4    | 0.34  | NA   | 3.07 | 0.86 | 2.51 |
| Ppil5    | 2.15  | NA   | NA   | NA   | 1.69 |
| Ppil6    | 3.9   | 1.3  | 0.49 | 2.34 | 0    |
| Ppip5k1  | NA    | 0.08 | 1.22 | 3.81 | NA   |
| Ppip5k2  | NA    | 1.74 | 0    | 1.06 | NA   |
| Ppl      | 0.02  | 1.63 | 1.61 | 0.02 | 1.8  |
| Ppm1a    | 0.97  | 1.3  | 2.51 | 3.8  | 0.98 |
| Ppm1b    | 0.02  | 2.5  | 1.65 | 1.69 | 0    |
| Ppm1d    | 0.54  | 2.18 | 1.43 | 0.17 | NA   |

|          |      |      |      |      |      |
|----------|------|------|------|------|------|
| Ppm1e    | 0    | 4.13 | 0    | 2.11 | 0    |
| Ppm1f    | 0    | 1.77 | 1.9  | 4.66 | 0    |
| Ppm1g    | 1.41 | 0    | 0    | 0.5  | 0    |
| Ppm1h    | 0.46 | 1.54 | 1.43 | 2.26 | 0    |
| Ppm1j    | NA   | NA   | 1.52 | 0    | 0.17 |
| Ppm1k    | NA   | NA   | 0.93 | 0.75 | 2.73 |
| Ppm1l    | 0.14 | NA   | 0.56 | 0.41 | 1.89 |
| Ppm1m    | NA   | NA   | 1.31 | 2.4  | 3.41 |
| Ppm1n    | NA   | NA   | 3.35 | 0.9  | NA   |
| Ppme1    | NA   | 1.07 | 1.09 | 0.04 | 1.58 |
| Ppox     | 0    | 0.67 | 1.14 | 0    | 0    |
| Ppp1ca   | 0    | 0    | 3.55 | 0.77 | 0    |
| Ppp1cb   | 0.88 | 0.57 | 5.19 | 0.74 | 0.66 |
| Ppp1cc   | 0.42 | 0.65 | 2    | 1.76 | 5.53 |
| Ppp1r10  | 0    | NA   | NA   | 0.02 | 2.76 |
| Ppp1r11  | 0.81 | 1.95 | 0    | 1.9  | 0.3  |
| Ppp1r12a | 0.61 | 0    | 2.21 | 0.02 | 0    |
| Ppp1r12b | NA   | 0    | 0.57 | 0    | 1.45 |
| Ppp1r12c | 0    | NA   | 0.72 | 0.59 | 0    |
| Ppp1r13b | 0.1  | 0    | 3.79 | 0    | 1.19 |
| Ppp1r13l | NA   | 1.56 | 1.27 | 1.45 | 1.42 |
| Ppp1r14a | 0.71 | NA   | 0    | 1.07 | 0    |
| Ppp1r14b | 0.14 | 0.01 | 1.23 | 0.51 | 3.41 |
| Ppp1r14c | 0.91 | NA   | 0    | 3.4  | 7.57 |
| Ppp1r14d | 0.87 | 0.25 | 0    | 1.7  | 7.76 |
| Ppp1r15a | NA   | 2.51 | 1.96 | 0.86 | 0    |
| Ppp1r15b | 0.48 | NA   | 0.2  | 2.07 | 1.47 |
| Ppp1r16a | 3.06 | NA   | 0.9  | 1.43 | 0.3  |
| Ppp1r16b | 0.84 | 0    | 0.54 | 1.48 | 2.65 |
| Ppp1r17  | NA   | 3.67 | 1.18 | 0    | NA   |
| Ppp1r18  | NA   | NA   | 1.19 | 0.68 | NA   |
| Ppp1r1a  | NA   | 1.93 | 2.33 | 1.18 | 0    |
| Ppp1r1b  | 0.61 | NA   | 3.48 | 0.47 | 0.81 |
| Ppp1r1c  | 0.3  | NA   | 3.21 | 1.04 | 2.34 |
| Ppp1r2   | 0.78 | 0.37 | 1.52 | 1.39 | 2.55 |
| Ppp1r21  | NA   | NA   | 2.08 | 0.05 | NA   |
| Ppp1r26  | NA   | 2.54 | 2.74 | 0.56 | NA   |
| Ppp1r27  | NA   | NA   | 1.28 | 1.82 | NA   |
| Ppp1r32  | NA   | NA   | 1.73 | 1.03 | NA   |
| Ppp1r35  | NA   | NA   | 0    | 5    | NA   |
| Ppp1r36  | NA   | NA   | 1.3  | 0.3  | NA   |

|         |      |      |      |       |      |
|---------|------|------|------|-------|------|
| Ppp1r37 | NA   | 1.61 | 2.04 | 3.94  | NA   |
| Ppp1r3a | 1.17 | 0.56 | 0.47 | 1.47  | 2.13 |
| Ppp1r3b | 0.35 | NA   | 0.58 | 0.84  | 0    |
| Ppp1r3c | 2.23 | 1.06 | 4.32 | 0     | 0    |
| Ppp1r3d | NA   | 0.28 | 1.78 | 2.14  | 0    |
| Ppp1r3e | 0.05 | NA   | 1.05 | 19.77 | 0    |
| Ppp1r3f | 1.06 | NA   | 1.45 | 3.39  | 0    |
| Ppp1r42 | NA   | NA   | NA   | 0.34  | NA   |
| Ppp1r7  | 1.05 | 0.73 | 0.84 | 0.83  | 1.35 |
| Ppp1r8  | 0.48 | 0.04 | 1.85 | 1.16  | 2.97 |
| Ppp1r9a | 0.92 | 1.25 | 0.53 | 0     | 0.15 |
| Ppp1r9b | 1.19 | NA   | NA   | 1.26  | NA   |
| Ppp2ca  | 0.35 | 0.75 | 2.42 | 0.07  | 1.04 |
| Ppp2cb  | 0    | 0.45 | 0.11 | NA    | NA   |
| Ppp2r1a | 0.39 | 2.38 | 0.32 | 0     | 1.86 |
| Ppp2r1b | 0.28 | 0.1  | 1.53 | 0.85  | 0    |
| Ppp2r2a | 0.67 | 1.87 | 1.22 | 0.35  | 0    |
| Ppp2r2b | NA   | 0    | 0.96 | 2.44  | 0.73 |
| Ppp2r2c | NA   | NA   | 0.4  | 0.72  | 1.48 |
| Ppp2r2d | 0.65 | 1.35 | 0.97 | 0.7   | 0.09 |
| Ppp2r3a | 0.37 | 0    | 0.79 | 1.37  | 1.34 |
| Ppp2r3c | NA   | 0    | 1.87 | 0.94  | 1.89 |
| Ppp2r4  | 0.98 | 1.61 | 0.48 | 8.66  | 0.89 |
| Ppp2r5a | 1    | 1.39 | 2.53 | 1.15  | 0    |
| Ppp2r5b | 6.4  | 2.37 | 0.66 | 0.35  | 2.34 |
| Ppp2r5c | 0.48 | 0.66 | 0.25 | 0.12  | 1.53 |
| Ppp2r5d | 0.59 | 0    | 2.37 | 0.57  | 2.59 |
| Ppp2r5e | 0    | 0.93 | 1.07 | 0     | 3.12 |
| Ppp3ca  | 0.29 | 1.03 | 0.85 | 0.31  | 0.24 |
| Ppp3cb  | 0    | 1.27 | 2.51 | 1.26  | 0    |
| Ppp3cc  | 0    | 0    | 2.48 | 0.59  | 0.86 |
| Ppp3r1  | 0    | 1.31 | 1.77 | 0.5   | 1.63 |
| Ppp3r2  | 0.06 | NA   | 2.42 | 1.12  | 0.16 |
| Ppp4c   | 0    | 1.43 | 0    | 1.07  | 0    |
| Ppp4r1  | 0.3  | 1.51 | 1.63 | 6.59  | 1.8  |
| Ppp4r11 | NA   | NA   | NA   | NA    | 0    |
| Ppp4r2  | 1.25 | 1.5  | 1.54 | 0.53  | 0    |
| Ppp4r4  | NA   | 1.49 | 0.4  | 0     | 3.63 |
| Ppp5c   | 1.29 | 0.85 | 2.45 | 1.55  | 0    |
| Ppp6c   | 0.56 | 2.08 | 1.36 | 1.07  | 0    |
| Ppp6r1  | NA   | 0    | 4.57 | 1.3   | NA   |

|          |      |      |      |      |       |
|----------|------|------|------|------|-------|
| Ppp6r2   | NA   | 0    | 0    | 0    | NA    |
| Ppp6r3   | NA   | 1.46 | 0.09 | 0    | NA    |
| Pppde1   | NA   | NA   | NA   | NA   | 2.16  |
| Pppde2   | NA   | NA   | NA   | NA   | 1.17  |
| Pprc1    | 0    | 2.47 | 0    | 2.4  | 3.26  |
| Ppt1     | 1.75 | 0.74 | 1.72 | 0.66 | 0     |
| Ppt2     | 0.29 | 3.06 | 0.59 | NA   | 1.42  |
| Pptc7    | NA   | NA   | 2.71 | 0.89 | 0     |
| Ppwd1    | NA   | 0    | 0    | 1.19 | 0     |
| Ppy      | 0    | 1.08 | 1.09 | 0    | 2.99  |
| Ppyr1    | 0    | NA   | NA   | NA   | 6.64  |
| Pqbp1    | 0.16 | 1.01 | 0.26 | 0.83 | 0     |
| Pqlc1    | NA   | 0.53 | 0.02 | 1.08 | 1.88  |
| Pqlc2    | 0.68 | 2.19 | 0.59 | 0.97 | 2.11  |
| Pqlc3    | NA   | 0.51 | 2.09 | 1.22 | 1.04  |
| Pradc1   | NA   | NA   | 2.12 | 1.96 | NA    |
| Praf2    | NA   | 2.21 | 0.3  | 2.36 | 0     |
| Pram1    | NA   | NA   | 3.85 | 2.38 | 11.49 |
| Prame    | NA   | 0.49 | 5.95 | 2.26 | 2.52  |
| Pramef12 | NA   | 0.81 | 0    | 2.5  | 0     |
| Prap1    | 1.33 | NA   | 0.72 | 2.01 | 2.42  |
| Prc1     | 1.01 | 0.4  | 0.5  | 0.05 | 1.84  |
| Prcc     | 1.34 | 1.48 | 3.55 | 0    | 0.94  |
| Prcp     | NA   | 1.92 | 2.3  | 0.82 | 2.48  |
| Prdm1    | 0.87 | 2.7  | 1.09 | 4.03 | 3.16  |
| Prdm10   | NA   | 1.31 | 0.81 | 0.57 | 1.36  |
| Prdm11   | NA   | 2    | 2.04 | 0.48 | 0     |
| Prdm13   | 1.32 | NA   | NA   | 2.94 | NA    |
| Prdm14   | NA   | 2.26 | 1.46 | 1.82 | 2.03  |
| Prdm15   | 3.31 | NA   | 1.15 | 0.34 | 0.66  |
| Prdm16   | 0.8  | 0.9  | 0.84 | 0.46 | 2.4   |
| Prdm2    | 1.09 | 0    | 3.56 | 0    | 0.58  |
| Prdm4    | 0.23 | 1.05 | 1.42 | 1.8  | 2.64  |
| Prdm5    | 0    | 1.85 | 1.26 | 2.14 | 2.37  |
| Prdm6    | NA   | NA   | 0.66 | 0.87 | 0     |
| Prdm8    | 0    | 4.07 | 2.33 | 1.44 | 0     |
| Prdm9    | NA   | 0.82 | 0.79 | 1.51 | 2.64  |
| Prdx1    | 0.99 | 0    | 0.27 | 0    | 0.14  |
| Prdx2    | 0.29 | 0.76 | 0.83 | 0.81 | 1.27  |
| Prdx3    | 0.72 | 1.58 | 2.06 | 1.12 | 0.4   |
| Prdx4    | 0.54 | 0    | 1.43 | 2.04 | 0     |



|          |      |      |      |      |       |
|----------|------|------|------|------|-------|
| Prdx5    | 2.04 | NA   | 0.16 | NA   | 3.76  |
| Prdx6    | 1.21 | 0.86 | 0.27 | 0    | 1.23  |
| Preb     | 0.02 | 1.91 | 0.95 | 0.83 | 0     |
| Prei3    | 0    | NA   | NA   | NA   | NA    |
| Prelid1  | NA   | NA   | 0.88 | 0.83 | 0.55  |
| Prelid2  | NA   | NA   | 0.68 | 2.74 | 0.23  |
| Prelp    | 0.22 | 0.77 | 0.97 | 1.43 | 1.75  |
| Prep     | 0.38 | 0.08 | 0.18 | 0.62 | 1.97  |
| Prepl    | NA   | 0    | 0.56 | 0.68 | 0     |
| Prex1    | NA   | NA   | 3.35 | 0    | 0     |
| Prex2    | NA   | 0    | 1.17 | 1.18 | 0.66  |
| Prf1     | 0    | 1.65 | 1.01 | 1.75 | 10.08 |
| Prg2     | 0.98 | 0.49 | 1.48 | 1.37 | 0     |
| Prg3     | 2.7  | 0.72 | 1.23 | 0.82 | 0     |
| Prg4     | 1.99 | 1.31 | 0    | 0    | 5.53  |
| Prh1     | 1.84 | NA   | NA   | NA   | NA    |
| Prhoxnb  | NA   | NA   | NA   | 1.44 | NA    |
| Prickle1 | 0.01 | NA   | 0.82 | 0    | 0.5   |
| Prickle2 | 3.89 | NA   | 0.47 | 0    | 0     |
| Prickle3 | NA   | 0.14 | 0.36 | 4.57 | 1.73  |
| Prim1    | 0    | 0.94 | 2.13 | 0.55 | 2.55  |
| Prim2    | NA   | 0    | 1.02 | 0.34 | 0.49  |
| Prima1   | 0.45 | NA   | 1.33 | 2.1  | 6.76  |
| Prkaa1   | 0.96 | 0.83 | 2.1  | 0.8  | 3.41  |
| Prkaa2   | 0    | 2.21 | 2.13 | 0    | 0     |
| Prkab1   | 0    | 1.63 | 1.54 | 1.3  | 1.78  |
| Prkab2   | 0    | 2.81 | 1.56 | 0    | 1.29  |
| Prkaca   | 0    | 1.2  | 0.14 | NA   | 0.65  |
| Prkacb   | 0.68 | 0.15 | 1.11 | 0.61 | 1.66  |
| Prkag1   | 5.34 | 0.45 | 4.49 | 2.04 | 1.81  |
| Prkag2   | NA   | 0    | 0.76 | 0    | 0.86  |
| Prkag3   | 0    | NA   | 4.58 | 1.37 | 0     |
| Prkar1a  | 0.49 | 0.32 | 1.92 | 0.43 | 0.54  |
| Prkar1b  | 1.24 | 0.68 | 0.79 | 1.6  | 0     |
| Prkar2a  | 0.1  | 0    | 0.91 | 1.14 | 1.17  |
| Prkar2b  | 0.68 | 1.84 | 2.45 | 3.35 | 0.78  |
| Prkca    | 0    | 0.35 | 0.18 | 0    | 0.56  |
| Prkcb    | NA   | 0    | 0.76 | 1.96 | 0.81  |
| Prkcd    | 0.41 | 0.27 | 3.51 | 1.47 | 0     |
| Prkcdbp  | 1.58 | 0.47 | 2.92 | 0    | 1.22  |
| Prkce    | 0.38 | 2.1  | 0.02 | 1.32 | 0     |

|         |      |      |      |      |      |
|---------|------|------|------|------|------|
| Prkeg   | NA   | 2.38 | 0.66 | 1.89 | NA   |
| Prkch   | 1.66 | 0    | 2.15 | 0.88 | 2.51 |
| Prkei   | 0    | 0.43 | 1.11 | 2.03 | 0    |
| Prkeq   | 0.47 | 0    | 0.72 | 1.21 | 4.15 |
| Prkesh  | 0.33 | 0    | 0.56 | 0    | 0    |
| Prkez   | 1.16 | 0    | 0.82 | 0.23 | 0    |
| Prkd1   | NA   | 0.47 | 0    | 1.47 | 0    |
| Prkd2   | NA   | 0.2  | 0.4  | 0    | 0    |
| Prkd3   | NA   | 0    | 0.89 | 4.19 | 1.86 |
| Prkdc   | 0    | 0    | 0.67 | 0    | 0.97 |
| Prkg1   | 0.32 | 0    | 0.85 | 0    | 0    |
| Prkg2   | NA   | 0    | 0.56 | 1.62 | 0.97 |
| Prkra   | NA   | 1.55 | 0.35 | 0.19 | 0    |
| Prkrip1 | 0.81 | 1.68 | 1.12 | 0.81 | 2.41 |
| Prkrir  | 0.02 | 1.03 | 3.36 | 4.02 | 3.86 |
| Prkx    | 0.39 | 1.91 | 1.34 | 4.72 | 0    |
| Prl     | 0    | 0    | 0    | 1.11 | 0    |
| Prlh    | NA   | NA   | NA   | 0.13 | NA   |
| Prlhr   | NA   | NA   | NA   | 2.3  | NA   |
| Prlr    | 0.27 | 0.43 | 0.72 | 0.62 | 3    |
| Prm1    | 1.27 | 0.75 | 0.51 | 5.37 | 1.33 |
| Prm2    | 1.04 | 2.03 | 0.67 | NA   | 0    |
| Prm3    | 2.53 | NA   | 2.09 | 0    | 0    |
| Prmt1   | NA   | 2.45 | 0.11 | 3.17 | 2.93 |
| Prmt10  | NA   | NA   | 1.05 | 0.74 | 0    |
| Prmt2   | NA   | 1.65 | 2.27 | NA   | 0    |
| Prmt3   | NA   | 0    | 0.25 | 1.08 | 0    |
| Prmt5   | NA   | 1.56 | 0    | 1.01 | 2.81 |
| Prmt6   | NA   | NA   | 0.81 | 1.23 | 0    |
| Prmt7   | NA   | 0    | 0.7  | 2.42 | 2.68 |
| Prmt8   | NA   | 0    | 0.48 | 2.61 | 1.18 |
| Prnd    | 0    | 2.28 | 2.11 | 2.22 | 7.34 |
| Prnp    | 0.47 | 0.13 | 0.33 | 1.87 | 2.02 |
| Proc    | 1.9  | 0.57 | 2.98 | 1.55 | 0.78 |
| Proca1  | NA   | NA   | 0    | 0.22 | 0    |
| Procr   | 3.55 | 1.41 | 2.9  | 1.84 | 1.7  |
| Prodh   | 5.62 | 0.39 | 1    | 1.25 | 1.84 |
| Prodh2  | 0.48 | 2.28 | 0.84 | 2.58 | 0    |
| Prok1   | 0.94 | NA   | NA   | 1.29 | NA   |
| Prok2   | 2.13 | NA   | 0.97 | 0.97 | 0    |
| Prokr1  | NA   | NA   | NA   | 0.63 | NA   |

|           |      |      |      |      |      |
|-----------|------|------|------|------|------|
| Prokr2    | NA   | NA   | 0.02 | 0    | 1.33 |
| Proll     | NA   | 2.94 | 0.45 | 0.62 | 0.99 |
| Prom1     | 1.33 | 1.62 | 1.79 | 0.6  | 0    |
| Prom2     | 1.91 | NA   | 0    | 2.15 | 1.68 |
| Prop1     | 1.34 | 1.94 | 0.12 | 4.17 | 0    |
| Pros1     | 1.25 | 3.95 | 1.38 | 0    | 1.55 |
| Prosapip1 | 0.89 | NA   | NA   | NA   | 1.34 |
| Prosc     | 0    | 0.71 | 0.18 | 0.77 | 0    |
| Proser1   | NA   | 1.48 | 0.77 | 1.49 | NA   |
| Proser2   | NA   | NA   | 0    | 1.42 | NA   |
| Prox1     | 3.21 | 1.21 | 0.26 | 1.14 | 0    |
| Prox2     | NA   | NA   | 1.57 | 0.54 | 0.09 |
| Proz      | 1.27 | 1.21 | 0    | 0.6  | 0    |
| Prpf18    | NA   | 1.3  | 0.9  | 0.71 | 0    |
| Prpf19    | NA   | 2.09 | 1.6  | 2.44 | 0    |
| Prpf3     | 0.64 | 1.58 | 1.61 | 0.84 | 0.02 |
| Prpf31    | 0    | 1    | 0.95 | NA   | 0    |
| Prpf38a   | NA   | NA   | 7.3  | 0.52 | 1.95 |
| Prpf38b   | NA   | 0.69 | 0.94 | 1.17 | 1.29 |
| Prpf39    | 0.19 | 1.21 | 0.87 | 0    | 1.68 |
| Prpf4     | 0.07 | 0    | 0    | 0.94 | 3.77 |
| Prpf40a   | NA   | 0    | 0.4  | 0.29 | 0    |
| Prpf40b   | NA   | NA   | 0.31 | NA   | 3.42 |
| Prpf4b    | 0.23 | 0.12 | 0.32 | 0.62 | 0    |
| Prpf6     | NA   | 1.2  | 0.4  | 0    | 2.61 |
| Prpf8     | 1.51 | 0    | 0.04 | 0    | 3.13 |
| Prph      | NA   | 0.81 | 1.76 | 0.83 | 0    |
| Prph2     | 1.75 | 2.85 | 0    | 8.45 | 7.72 |
| Prps1     | 0.25 | 0    | 1.11 | 0.6  | 3.46 |
| Prps111   | NA   | 1.6  | 0.81 | 5.6  | 8.91 |
| Prps2     | 1.19 | 0.54 | 1.81 | 0.53 | 2.28 |
| Prpsap1   | 0    | 0    | 2.27 | 0.75 | 2.26 |
| Prpsap2   | 0    | 0    | 2.22 | 1.16 | 0    |
| Prr11     | NA   | 0    | 2.58 | 0.9  | 0.39 |
| Prr12     | NA   | NA   | 0.81 | 1.08 | 0    |
| Prr13     | NA   | 0.07 | 1.44 | 1.8  | 0    |
| Prr14     | NA   | 1.78 | 0.38 | 2.02 | 0.3  |
| Prr14l    | NA   | 2.07 | 0.8  | 0.54 | NA   |
| Prr15     | NA   | NA   | 0.37 | 2.74 | 0    |
| Prr15l    | NA   | 1.75 | 0    | 2.62 | NA   |
| Prr16     | NA   | 0    | 0.21 | 5.5  | 2.21 |

|        |      |      |      |      |       |
|--------|------|------|------|------|-------|
| Prr18  | NA   | NA   | 0.79 | 1.1  | 4.16  |
| Prr19  | NA   | NA   | NA   | 1    | NA    |
| Prr23a | NA   | NA   | NA   | 0.23 | NA    |
| Prr24  | NA   | NA   | 1.88 | NA   | NA    |
| Prr3   | 1    | 0    | 1.28 | 1.36 | 1.29  |
| Prr5   | NA   | 0    | 0.17 | NA   | NA    |
| Prr51  | NA   | 0    | 0.16 | 1.56 | 4.22  |
| Prr7   | NA   | NA   | NA   | 0.99 | NA    |
| Prr9   | NA   | NA   | 0.13 | NA   | 11.99 |
| Prrc1  | NA   | 0.76 | 0.83 | 0.23 | 0     |
| Prrc2a | NA   | 0.93 | 1.04 | 1.22 | NA    |
| Prrc2b | NA   | 0    | 1.69 | 1.12 | NA    |
| Prrc2c | NA   | 0    | 0.54 | 2.26 | NA    |
| Prrg1  | NA   | 1.57 | 1.21 | 0.51 | 1.15  |
| Prrg2  | 0.72 | 0    | 0    | 0.62 | 0     |
| Prrg3  | NA   | 1.53 | 1.3  | 2.96 | 1.88  |
| Prrg4  | 3.38 | 1.91 | 1.11 | 0.77 | NA    |
| Prrt1  | NA   | NA   | 1.47 | 0.97 | 2.67  |
| Prrt2  | NA   | NA   | 3.37 | 0    | NA    |
| Prrt3  | NA   | NA   | 1.2  | 0.45 | NA    |
| Prrx1  | 0.05 | 0.38 | 0.85 | 2.4  | 0     |
| Prrx2  | 3.15 | 0.93 | 0.7  | 0.14 | 4.88  |
| Prss12 | 0.24 | 1.46 | 1.26 | 0.75 | 0     |
| Prss16 | 0    | 3.9  | 3.53 | 0.7  | 0     |
| Prss2  | 3.11 | 0.73 | 0.36 | 1    | 0.69  |
| Prss21 | 0.73 | 0    | 1.47 | 1.17 | 3.21  |
| Prss22 | 0.59 | 0.72 | 2.7  | 1.71 | 1.58  |
| Prss23 | NA   | 0    | 1.9  | 0    | 1.16  |
| Prss27 | NA   | NA   | 1.26 | 1.2  | NA    |
| Prss3  | NA   | 0    | 1.15 | 1.26 | 21.56 |
| Prss33 | 0.85 | NA   | NA   | 0.34 | NA    |
| Prss35 | 0.66 | NA   | 1.61 | 0.44 | 0.92  |
| Prss36 | NA   | NA   | 2.4  | 1.79 | NA    |
| Prss37 | NA   | NA   | 0    | 1.33 | NA    |
| Prss38 | NA   | NA   | NA   | 2.09 | NA    |
| Prss41 | NA   | NA   | NA   | 1.46 | NA    |
| Prss42 | NA   | NA   | NA   | 0    | NA    |
| Prss45 | NA   | NA   | NA   | 1.24 | NA    |
| Prss48 | NA   | NA   | NA   | 7.21 | NA    |
| Prss50 | NA   | 2.34 | 0.69 | 1.58 | NA    |
| Prss53 | NA   | 1.03 | 0.06 | 1.15 | NA    |

|         |      |      |      |      |      |
|---------|------|------|------|------|------|
| Prss54  | NA   | NA   | 0.48 | 0.28 | NA   |
| Prss55  | NA   | NA   | 0.29 | 2.96 | NA   |
| Prss58  | NA   | NA   | 0.88 | 2.94 | NA   |
| Prss7   | 0.53 | NA   | NA   | NA   | NA   |
| Prss8   | 2.12 | 1.53 | 0    | 1.26 | 0    |
| Prssl1  | 0    | NA   | NA   | NA   | NA   |
| Prtg    | NA   | NA   | 0    | 2.18 | 0    |
| Prtn3   | 0    | 0.03 | 4.87 | 1.1  | 1.19 |
| Prune   | NA   | 0    | 0.39 | 2.74 | 1.24 |
| Prune2  | NA   | 0    | 0.84 | 0.92 | 2.5  |
| Prx     | 1.13 | 2.44 | 1.34 | 2.29 | 2.58 |
| Psap    | 1.88 | 1.98 | 1.71 | 0    | 5.42 |
| Psapl1  | NA   | NA   | 1.45 | 1.21 | NA   |
| Psat1   | 0.29 | 1.38 | 2.24 | 1    | 0.97 |
| Psca    | 1.14 | 2.08 | 1.36 | 1.36 | 1.61 |
| Pscd1   | 0.02 | NA   | NA   | NA   | NA   |
| Pscd2   | 0.89 | NA   | NA   | NA   | NA   |
| Pscd3   | 0.78 | NA   | NA   | NA   | NA   |
| Pscd4   | 0.05 | NA   | NA   | NA   | NA   |
| Pscdbp  | 0.98 | NA   | NA   | NA   | NA   |
| Psd     | NA   | 1.02 | 0.56 | 1.74 | 0.11 |
| Psd2    | 0.73 | NA   | 1.41 | 0.19 | 2.57 |
| Psd3    | NA   | 0.64 | 1.18 | 0    | 1.36 |
| Psd4    | 1.25 | 0    | 1.37 | 1.33 | 0.96 |
| Psen1   | 0    | 0    | 0.74 | 0    | 0    |
| Psen2   | 0.12 | 0.69 | 0.54 | 4.38 | 1.14 |
| Psenen  | NA   | 1.95 | 4.02 | 0    | 1.73 |
| Psip1   | 1.67 | 0    | 1.95 | 1.83 | 0    |
| Pskh1   | NA   | 0    | 0.54 | 0    | 0.17 |
| Psma1   | 0.64 | 0.03 | 1.36 | 6.93 | 1.33 |
| Psma2   | 0    | 0    | 0.54 | 1.1  | 2.08 |
| Psma3   | 0    | 0    | 1.57 | 2.16 | 0    |
| Psma4   | 0.49 | 0    | 1.88 | NA   | 0.97 |
| Psma5   | 0.19 | 0.83 | 1.05 | 0.26 | 0    |
| Psma6   | 1.63 | 0    | 1.02 | 0.81 | 1.07 |
| Psma7   | 0    | 0    | 3.17 | 0    | 0    |
| Psma8   | NA   | NA   | 2.3  | 2.42 | 7.26 |
| Psemb1  | 0.73 | 0    | 0.92 | 0.04 | 1.07 |
| Psemb10 | 0.63 | 0.7  | 2.58 | 0    | 1.38 |
| Psemb11 | NA   | NA   | NA   | 0.6  | NA   |
| Psemb2  | 0.03 | 1.11 | 1.28 | 1.86 | 5.5  |

|          |      |      |      |      |      |
|----------|------|------|------|------|------|
| Psmb3    | 0.55 | 0    | 0.7  | 0.08 | 1.95 |
| Psmb4    | 0.87 | 0    | 2.1  | 1.04 | 0.14 |
| Psmb5    | 3.49 | 0    | 1.18 | 9.44 | 1.7  |
| Psmb6    | 1.8  | 0    | 1.91 | 0    | 1.74 |
| Psmb7    | 0.32 | 0    | 0.33 | 0.35 | 0    |
| Psmb8    | 0.5  | 0.21 | 0.53 | 0.71 | 0    |
| Psmb9    | 0.52 | 0.78 | 2.21 | 2.8  | 0.55 |
| Psmc1    | 1.04 | 0.01 | 1.39 | 0.98 | 0    |
| Psmc2    | 0    | 0.7  | 0.13 | 1.14 | 0    |
| Psmc3    | 0.44 | 1.27 | 0.16 | 1.83 | 0    |
| Psmc3ip  | 3.28 | 0.07 | 2.95 | 0.86 | 0.43 |
| Psmc4    | 0.17 | 1.77 | 0.46 | 0.02 | 0    |
| Psmc5    | 0.47 | 2.01 | 1.78 | 1.28 | 0    |
| Psmc6    | 0.5  | 0.11 | 1.91 | 0.43 | 0    |
| Psmc1    | 0.08 | 0.94 | 1.13 | 0.45 | 0    |
| Psmc10   | 1.22 | 1.15 | 3.57 | 0    | 3.5  |
| Psmc11   | 0.69 | 0.75 | 1.57 | 1.85 | 2.05 |
| Psmc12   | 0.35 | 0.18 | 1.69 | 2.39 | 3.41 |
| Psmc13   | 0.12 | 0.84 | 1.48 | 0    | 0.19 |
| Psmc14   | 0.43 | 0.36 | 3.38 | 0.86 | 2.66 |
| Psmc2    | 0.09 | 0.97 | 1.02 | 0.36 | 1.85 |
| Psmc3    | 0.31 | 2.49 | 0.05 | 1    | 4.35 |
| Psmc4    | 0.6  | 1.09 | 0.93 | 1.3  | 1.11 |
| Psmc5    | 0.01 | 1.6  | 1.62 | 0    | 0    |
| Psmc6    | NA   | 0    | 2.48 | 0.79 | 0.51 |
| Psmc7    | 1.14 | 0.86 | 0.07 | 4.42 | 3.67 |
| Psmc8    | 0.66 | 0.64 | 3.35 | 0    | 3.71 |
| Psmc9    | 0.48 | 1.27 | 0.6  | 0.57 | 0.8  |
| Psmc1    | 0.57 | 1.5  | 3.26 | 0    | 3.39 |
| Psmc2    | 0.39 | 0.48 | 1.54 | 2.48 | 2    |
| Psmc3    | 0.28 | 0.69 | 0    | 0.84 | 1.37 |
| Psmc4    | 0.6  | 0.44 | 0.1  | 0    | 0    |
| Psmf1    | 0    | 0.01 | 0.51 | 1.01 | 0    |
| Psmg1    | NA   | 1.57 | 3.86 | 0    | 0    |
| Psmg2    | NA   | 0    | 0.94 | 0    | 3.54 |
| Psmg3    | NA   | NA   | 0.36 | 3.28 | 2.37 |
| Psmg4    | NA   | NA   | 1.88 | 1.7  | 0.72 |
| Psors1c2 | 1.5  | 1.22 | 0.85 | 1.84 | 1.86 |
| Pspc1    | 1.2  | 0.14 | 0.27 | 0    | 1.29 |
| Psph     | 1.12 | 2.39 | 2.1  | 0.88 | 2.13 |
| Pspn     | 0    | 1.96 | 4.2  | 0.33 | 0    |

|         |      |      |       |      |      |
|---------|------|------|-------|------|------|
| Psrc1   | NA   | 1.04 | 0.24  | 2    | 0.41 |
| Pstk    | NA   | NA   | 0.54  | 0.03 | 0    |
| Pstpip1 | 0.69 | 2.24 | 3.83  | 0    | 0    |
| Pstpip2 | 0.23 | 0    | 1.68  | 1.29 | 0    |
| Ptafr   | 0.76 | 1.35 | 1.81  | 0.59 | 2.13 |
| Ptar1   | NA   | NA   | 1.02  | 0.55 | 0    |
| Ptbp1   | 0.36 | 0    | 1.1   | 0    | 0    |
| Ptbp2   | 0.46 | 0.28 | 1.4   | 0.41 | 0    |
| Ptbp3   | NA   | 2.25 | 2.78  | 0    | NA   |
| Ptcd1   | NA   | 1.14 | 0.97  | 0.77 | 1.02 |
| Ptcd2   | 0    | 0    | 0     | 0.85 | 0.1  |
| Ptcd3   | NA   | 0    | 0     | 0.18 | 2.09 |
| Ptch1   | 0.22 | 0.36 | 0.87  | 1.72 | 0.53 |
| Ptch2   | 2    | 0.99 | 1.18  | 0.01 | 0    |
| Ptchd1  | 3.56 | NA   | 0.03  | 0    | 2.39 |
| Ptchd2  | NA   | NA   | 1.02  | 2.21 | 1.61 |
| Ptchd3  | NA   | NA   | NA    | 0.7  | NA   |
| Ptchd4  | NA   | NA   | 7.02  | 1.47 | NA   |
| Ptcra   | 0.19 | 0.04 | 2.84  | 0.97 | 2.56 |
| Ptdss1  | 1.96 | 0    | 1.77  | 2.08 | 0    |
| Ptdss2  | 0    | 1.58 | 0.5   | 1.56 | 0.68 |
| Pten    | 1.11 | 0.05 | 0.17  | 0.47 | 0    |
| Pter    | 0.51 | 1.61 | 0.72  | NA   | 4.07 |
| Ptfla   | 3.41 | NA   | NA    | 0.85 | NA   |
| Ptgdr   | 3.06 | 0.87 | 0.82  | 1.46 | 2.49 |
| Ptgds   | 2.23 | 1.46 | 1.12  | 1.74 | 1.56 |
| Ptger1  | 0.5  | 0    | 1.77  | 1.25 | 0    |
| Ptger2  | 0    | 1.55 | 1.03  | 0    | 0    |
| Ptger3  | 0.14 | 0.57 | 0.71  | 5.47 | 1.23 |
| Ptger4  | 0    | 1.76 | 2.22  | 0.78 | 2.78 |
| Ptges   | 0.25 | 0    | 0.57  | 1.78 | 0    |
| Ptges2  | 0    | 2.17 | 1.46  | 1.51 | 0    |
| Ptges3  | NA   | 1.4  | 1.15  | 0.15 | 2.07 |
| Ptgfr   | 0.6  | 1.15 | 0     | 1.66 | 0    |
| Ptgfrn  | 2.15 | NA   | 0.01  | 1.23 | 0.14 |
| Ptgir   | 0.51 | 1.58 | 10.46 | 0.77 | 1.64 |
| Ptgis   | 2.1  | 0.88 | 0     | 0.87 | 2.36 |
| Ptgr1   | NA   | NA   | 1     | 2.33 | 2.25 |
| Ptgr2   | NA   | NA   | 1.17  | 1.03 | 0    |
| Ptgs1   | 0.01 | 0.97 | 1.05  | 0    | 0.47 |
| Ptgs2   | 0    | 2.68 | 2.19  | 0.06 | 0    |

|         |       |      |      |      |      |
|---------|-------|------|------|------|------|
| Pth     | 1.33  | 1.73 | 0    | 2.86 | 6.3  |
| Pth1r   | NA    | 3.07 | 0.63 | 1.1  | 0    |
| Pth2    | NA    | NA   | 1.68 | 1.17 | NA   |
| Pth2r   | NA    | 1.97 | 0.02 | 0    | 2.03 |
| Pthlh   | 1.24  | 0.54 | 1.09 | 1.04 | 1.85 |
| Pthr1   | 0.06  | NA   | NA   | NA   | NA   |
| Pthr2   | 2.29  | NA   | NA   | NA   | NA   |
| Ptk2    | 0.72  | 0.01 | 1.02 | 1.98 | 0    |
| Ptk2b   | 2.79  | 1.53 | 1.16 | 0.36 | 0    |
| Ptk6    | 3.88  | 1.74 | 0    | 0.88 | 0    |
| Ptk7    | 0     | 1.24 | 1.02 | 0    | 0    |
| Ptk9    | 1.02  | NA   | NA   | NA   | NA   |
| Ptma    | 0.19  | 3.41 | 0.86 | 0.13 | NA   |
| Ptms    | NA    | 1.28 | 3.92 | 0.76 | 0    |
| Ptn     | 0.23  | 0.24 | 0.6  | 2.12 | 0    |
| Ptov1   | 0     | 0    | 0.41 | 0.78 | 0    |
| Ptp4a1  | 1.14  | 1.33 | 2.49 | 0.53 | 0    |
| Ptp4a2  | 0.66  | 0.46 | 1.87 | 0    | 0    |
| Ptp4a3  | 0.89  | 0    | 1.02 | 3.22 | 0.02 |
| Ptpdc1  | NA    | NA   | 1.51 | 4.63 | 0.56 |
| Ptpla   | 0     | 2.09 | 3.93 | 1.05 | 1.44 |
| Ptplad1 | NA    | 0.17 | 0.31 | 0.59 | 0    |
| Ptplad2 | NA    | NA   | 2.63 | 2.35 | 0    |
| Ptplb   | 0.27  | 2.82 | 1.44 | 0.2  | 5.68 |
| Ptpmt1  | NA    | 2.25 | 2.01 | 1.87 | 0    |
| Ptpn1   | 0     | 0.63 | 2.9  | 9.88 | 0    |
| Ptpn11  | 0.1   | 0.28 | 1.06 | 1.52 | 0.69 |
| Ptpn12  | 0     | 0.82 | 3    | 0.29 | 0    |
| Ptpn13  | 0.33  | 0.33 | 0.46 | 1.11 | 0.52 |
| Ptpn14  | 0.28  | 1.7  | 1.04 | 0    | 1.8  |
| Ptpn18  | 0.82  | 0.11 | 2.28 | 1.99 | 0    |
| Ptpn2   | 0.25  | 0.01 | 4.87 | 0.72 | 0    |
| Ptpn20  | 12.12 | NA   | NA   | NA   | NA   |
| Ptpn21  | 1.3   | 0.81 | 0.63 | 2.26 | 2.07 |
| Ptpn22  | NA    | 1.14 | 0.78 | 0.95 | 2.06 |
| Ptpn23  | 1.45  | NA   | 3.69 | 0    | 2.61 |
| Ptpn3   | 2.41  | 2.88 | 2.3  | 1.89 | 1.65 |
| Ptpn4   | 0.34  | 0    | 0.84 | 0.45 | 5.59 |
| Ptpn5   | 3.18  | NA   | 0.5  | 1.85 | 2.18 |
| Ptpn6   | NA    | 2.56 | 3.99 | 0.21 | 1.39 |
| Ptpn7   | 0     | NA   | NA   | 0.16 | NA   |



|         |      |      |      |      |      |
|---------|------|------|------|------|------|
| Ptpn9   | 0.73 | 3.33 | 2.64 | 1.24 | 1.82 |
| Ptpra   | 1.15 | 0    | 0.1  | NA   | 0    |
| Ptprb   | 0.64 | 1.39 | 0.67 | 3.01 | 1.47 |
| Ptprc   | 0.61 | 1.1  | 2.12 | 1.27 | 0.18 |
| Ptprcap | 3.03 | 0    | 2.02 | NA   | 0    |
| Ptprd   | 0.77 | 0.68 | 0.3  | 0    | 2.18 |
| Ptpre   | 0    | 2.06 | 0.65 | 1.76 | 6.07 |
| Ptprf   | 1.02 | 1.06 | 0.46 | 1.58 | 0    |
| Ptprg   | 1.48 | 0.18 | 0.72 | 3.14 | 0    |
| Ptprh   | 1.95 | NA   | NA   | 0.71 | NA   |
| Ptprj   | 0.27 | 1.07 | 0.71 | 1.05 | 0.14 |
| Ptprk   | 0    | 2.74 | 0.53 | 1.05 | 0.54 |
| Ptprm   | 0.58 | 0.69 | 2.72 | 0    | 0.05 |
| Ptprn   | 0.18 | 1.95 | 2.16 | 0.1  | 1.02 |
| Ptprn2  | 0    | 0.07 | 1.44 | 0.86 | 0    |
| Ptpro   | 0    | 0.9  | 0.96 | 0    | 0    |
| Ptprq   | 7.32 | NA   | NA   | NA   | NA   |
| Ptprr   | 0.44 | 1.09 | 1.9  | 0.25 | 2.5  |
| Ptprs   | 1.2  | 1.19 | 2.66 | 0    | 1.11 |
| Ptprt   | 0.22 | 1.07 | 0    | 0.63 | 2.92 |
| Ptpru   | 1.98 | 0.99 | 1.98 | 0    | 3.1  |
| Ptprv   | 0.88 | NA   | NA   | NA   | NA   |
| Ptprz1  | 1.1  | 0    | 1.35 | 1.24 | 0    |
| Ptrf    | 0.65 | 1.39 | 0.94 | 0.64 | 0    |
| Ptrh1   | NA   | NA   | 2.52 | NA   | 1.91 |
| Ptrh2   | NA   | 2.11 | 2.64 | 1.76 | 0    |
| Ptrhd1  | NA   | NA   | 1.99 | 0    | NA   |
| Pts     | 0.14 | 1.96 | 1.64 | 2.67 | 0.28 |
| Pttg1   | 0.77 | 1.18 | 1.1  | NA   | 0.7  |
| Pttg1ip | 0.39 | 2.23 | 3    | 0.6  | 3.76 |
| Ptx3    | 0    | 0.04 | 1.03 | 0    | 0    |
| Ptx4    | NA   | NA   | NA   | 0.15 | NA   |
| Puf60   | NA   | 0    | 0.74 | 0.71 | 3.24 |
| Pum1    | 0.65 | 0    | 1.82 | 2.42 | 2.87 |
| Pum2    | 0.06 | 0.26 | 1.07 | 2.86 | 2.11 |
| Punc    | 0.44 | NA   | NA   | NA   | NA   |
| Pura    | 2.23 | 0    | 1.28 | 2.01 | 4.21 |
| Purb    | 0    | NA   | 0.73 | 1.29 | 0.63 |
| Purg    | 0.55 | 0.85 | 2.05 | 1.11 | 1.69 |
| Pus1    | 0    | 1.87 | 1.7  | 4.48 | 0    |
| Pus10   | NA   | NA   | 0    | 0.31 | 0.35 |

|         |      |      |      |      |      |
|---------|------|------|------|------|------|
| Pus3    | 0.13 | 2.4  | 1.39 | 0.9  | 2.41 |
| Pus7    | NA   | 1.99 | 0.89 | 1.03 | NA   |
| Pus7l   | NA   | 0.25 | 1.05 | 1.36 | 1.2  |
| Pusl1   | NA   | NA   | NA   | 1.03 | NA   |
| Pvalb   | 0.8  | 0.85 | 0.56 | 2.37 | 6.12 |
| Pvr     | 0.26 | 1.05 | 0.59 | 0.73 | 2.26 |
| Pvrl1   | 0.38 | 0.99 | 0.39 | 0.64 | 0    |
| Pvrl2   | 0    | 1.22 | 3.56 | 0.62 | 0    |
| Pvrl3   | 0    | 0.97 | 0.42 | 1.32 | 2.15 |
| Pvrl4   | 0.27 | NA   | 2.89 | 1.09 | 0    |
| Pvt1    | 1.79 | 0.91 | 0.16 | NA   | 1.4  |
| Pwp1    | NA   | 1.25 | 0.06 | 0.81 | 8.43 |
| Pwp2    | NA   | 1.1  | 1.8  | 3.85 | 2.56 |
| Pwwp2   | 1.21 | NA   | NA   | NA   | NA   |
| Pwwp2a  | NA   | NA   | 1.36 | 2.36 | 2.83 |
| Pwwp2b  | NA   | NA   | 1.73 | 2.53 | 0.47 |
| Pxdc1   | NA   | 3.12 | 1.01 | 1.53 | NA   |
| Pxdn    | NA   | 0.86 | 2.07 | 1.3  | 0    |
| Pxk     | NA   | NA   | 2.25 | 1.14 | 0    |
| Pxmp2   | 0    | 2.69 | 1.01 | 4.94 | 0.64 |
| Pxmp3   | 0.49 | NA   | NA   | NA   | 0    |
| Pxmp4   | 0    | 0    | 2.04 | 0.82 | 0.54 |
| Pxn     | 0    | 2.92 | 3.01 | 1.95 | 0.01 |
| Pxt1    | 1.17 | NA   | 0.12 | 2.14 | NA   |
| Pycard  | 0    | 0.9  | 0.83 | 0.58 | 0    |
| Pycr1   | 0.68 | 2.61 | 0    | 0.77 | 1.65 |
| Pycr2   | 0    | NA   | 0.6  | 3.29 | NA   |
| Pycrl   | 0.1  | 1.5  | 1.98 | 2.55 | 2.05 |
| Pygb    | 0.21 | 0    | 2.28 | 0    | 1.36 |
| Pygl    | 0.53 | 0.18 | 2.19 | 0    | 0    |
| Pygm    | 3.08 | 1.28 | 0.62 | 0.16 | 0    |
| Pygo1   | 0    | 1.1  | 2.72 | 2.08 | 2.24 |
| Pygo2   | 0.05 | NA   | 0.12 | 0.87 | 0.42 |
| Pyhin1  | NA   | 1.1  | 0.85 | 0.06 | 0.71 |
| Pyroxd1 | NA   | 1.41 | 0.68 | 0.56 | 3.12 |
| Pyroxd2 | NA   | NA   | 0.86 | NA   | 0.45 |
| Pyurf   | NA   | NA   | NA   | 0    | NA   |
| Pyy     | 0.44 | 2.24 | 0.02 | 1.01 | 0    |
| Pzp     | 0.76 | 0.32 | 0    | 1.81 | 4.95 |
| Qars    | 0    | 0    | 0.76 | 1.12 | 0    |
| Qdpr    | 0.1  | 0    | 0.98 | 1.74 | 1.1  |

|           |      |      |      |      |      |
|-----------|------|------|------|------|------|
| Qpet      | 0    | 4.09 | 1.41 | 5.32 | 6.77 |
| Qpctl     | 2.44 | 1.86 | 0.97 | 0.01 | 0    |
| Qprt      | 5.03 | 2.57 | 1.01 | 2.15 | 0    |
| Qrfp      | NA   | NA   | NA   | 1.86 | NA   |
| Qrfpr     | NA   | NA   | 1.98 | 0    | NA   |
| Qrich1    | NA   | 1.22 | 0.41 | 0.83 | 1.94 |
| Qrich2    | NA   | NA   | 3.97 | 0.49 | 3.28 |
| Qrs11     | 1.64 | 0    | 0.81 | 1.13 | 0    |
| Qscn6     | 0.05 | NA   | NA   | NA   | NA   |
| Qscn611   | 0.75 | NA   | NA   | NA   | NA   |
| Qser1     | NA   | 1.48 | 0.85 | 1.93 | 0.37 |
| Qsox1     | NA   | 0    | 1.79 | NA   | 0    |
| Qsox2     | NA   | NA   | 4.32 | 1.87 | 0    |
| Qtrt1     | 0    | 2.18 | 0.76 | 2.78 | 0.69 |
| Qtrtd1    | 0.56 | 1.65 | 1.56 | 1.55 | 2.1  |
| R3hcc1    | NA   | 2.29 | 3.26 | 0.3  | 6.32 |
| R3hcc11   | NA   | 0    | 0    | 0.03 | NA   |
| R3hdm1    | NA   | 0.13 | 0.92 | 0.8  | 1.07 |
| R3hdm2    | NA   | 2.33 | 1.31 | 0.6  | 2.52 |
| R3hdm4    | NA   | 0    | 1.04 | 1.36 | NA   |
| R3hdml    | NA   | NA   | NA   | 1.19 | NA   |
| Rab10     | 1    | NA   | 1.9  | 0.85 | 0    |
| Rab11a    | 0.48 | 1.99 | 1.72 | 2.23 | 0    |
| Rab11b    | 2.94 | 0.65 | 1.1  | 1.47 | 0    |
| Rab11fip1 | 0.64 | 2.11 | 0.37 | 0.55 | 4.18 |
| Rab11fip2 | 1.61 | 0.67 | 0.55 | 0.8  | 0    |
| Rab11fip3 | 0    | 1.52 | 0.77 | 1.84 | 0.95 |
| Rab11fip4 | 3.37 | 1.17 | 0.29 | 1.87 | 1.95 |
| Rab11fip5 | 0.87 | 2.82 | 2.28 | 1.42 | 2.58 |
| Rab12     | 0.17 | NA   | 2.29 | 0.15 | 0.63 |
| Rab13     | 2    | 2.84 | 0.72 | 0.87 | 0.14 |
| Rab14     | 0.04 | 0.45 | 0.75 | 1.64 | 0    |
| Rab15     | 1.34 | 3.39 | 0    | 6.27 | 5.3  |
| Rab17     | 0.19 | 2.57 | 4.31 | 2.51 | 0    |
| Rab18     | 0.47 | NA   | 1.6  | 0.91 | 1.66 |
| Rab19     | NA   | NA   | NA   | 1.23 | NA   |
| Rab1b     | NA   | 2.03 | 1.03 | 0.65 | 1.92 |
| Rab20     | 0.79 | 0.02 | 2.31 | 2.97 | 0    |
| Rab21     | 0.83 | 1.89 | 2.1  | 0.03 | 0    |
| Rab22a    | 0    | 0.59 | 0.55 | 0.4  | 1.14 |
| Rab23     | 0    | 1.04 | 0.36 | 0.82 | 0.36 |

|          |      |      |      |      |      |
|----------|------|------|------|------|------|
| Rab24    | 0    | NA   | 3.03 | 0.8  | 0    |
| Rab25    | 0.19 | 0.56 | 0.3  | 0.37 | 6.95 |
| Rab26    | 1.18 | 1.41 | 2.09 | 1.34 | 3.02 |
| Rab27a   | 0.27 | 0    | 0.05 | 1.64 | 0    |
| Rab27b   | 0.25 | 1.55 | 0.81 | 0.33 | 0    |
| Rab28    | 0.18 | 0.11 | 1.58 | 0.01 | 2.4  |
| Rab2a    | NA   | 0    | 0.78 | 0.92 | 1.18 |
| Rab2b    | 0.49 | NA   | 1.46 | 0.61 | 0    |
| Rab30    | NA   | 2.53 | 0.1  | 0.67 | 1.18 |
| Rab31    | NA   | 0    | 2.05 | 2.09 | 0.26 |
| Rab32    | 1.84 | 0    | 5.44 | 0.76 | 0    |
| Rab33a   | NA   | 0.29 | 1.05 | 3.19 | 2.12 |
| Rab33b   | 0    | 0.66 | 2.07 | 0    | 4.89 |
| Rab34    | 0.16 | NA   | 3.12 | 1.4  | 0    |
| Rab35    | 0    | 1.09 | 0.52 | 2.04 | 2.38 |
| Rab36    | 1.65 | 1.94 | 0.06 | 1.15 | 0.07 |
| Rab37    | 0.36 | NA   | 0.75 | 1.99 | 0    |
| Rab38    | 0    | 0.19 | 2.17 | 1.39 | 2.99 |
| Rab39    | 2.19 | NA   | NA   | NA   | NA   |
| Rab39b   | 2.99 | NA   | 0.63 | 0.96 | 0    |
| Rab3a    | 2.01 | 2.16 | 1.03 | 0.14 | 3.92 |
| Rab3b    | 1.23 | 1.9  | 0.32 | 0.71 | 0    |
| Rab3c    | 0.32 | NA   | 0.33 | 0    | 0.93 |
| Rab3d    | 0    | 0.39 | 1.41 | 0.12 | 1.82 |
| Rab3gap1 | NA   | 1.04 | 0.11 | 0.61 | 0    |
| Rab3gap2 | NA   | 1.42 | 1.26 | 0    | 0    |
| Rab3il1  | 0    | 1.29 | 1.47 | 1.2  | 1.32 |
| Rab3ip   | 0    | NA   | 2.08 | 0.77 | 0    |
| Rab40b   | 1.02 | 0.62 | 1.18 | 1.03 | 0.59 |
| Rab40c   | 0.21 | 2.49 | 1.24 | 0.88 | 1.26 |
| Rab42    | NA   | NA   | 2.85 | 0    | NA   |
| Rab43    | NA   | NA   | 0.79 | 2.24 | 1.72 |
| Rab44    | NA   | NA   | NA   | 1.96 | NA   |
| Rab4a    | 0    | 0    | 2.4  | NA   | 1.76 |
| Rab4b    | 0.87 | 0.64 | 1.49 | 1.72 | 6.5  |
| Rab5a    | 0    | 1.18 | 1.87 | 1.1  | 0    |
| Rab5b    | 0.21 | 0.03 | 0.58 | 0.52 | 0.73 |
| Rab5c    | 0    | 3.28 | 1.9  | 0.03 | 1.98 |
| Rab6a    | NA   | 0.92 | 2.81 | 1.03 | NA   |
| Rab6b    | 0    | 0.91 | 1.87 | 2.25 | 0    |
| Rab6ip1  | 0.52 | NA   | NA   | NA   | NA   |

|          |      |      |      |      |      |
|----------|------|------|------|------|------|
| Rab711   | 0.45 | 0.92 | 0.86 | 0    | 1.33 |
| Rab8a    | 1.67 | 1.32 | 2.63 | 0.4  | 1.22 |
| Rab8b    | 2.17 | 0    | 1.94 | 1.05 | 0    |
| Rab9b    | 1.28 | NA   | 1.54 | 1.62 | 0.12 |
| Rabac1   | 0.28 | 3.28 | 2.89 | 1.02 | 2.38 |
| Rabep1   | 1.57 | 0.88 | 1.24 | 0.93 | 1.47 |
| Rabep2   | 0.74 | 0.16 | 2.24 | 0.33 | 0    |
| Rabepk   | NA   | 1.08 | 0    | 2.88 | 0.62 |
| Rabgap1  | 0.54 | 0.34 | 0.59 | 0    | 2.16 |
| Rabgap11 | 1.17 | 0.43 | 1.19 | 1.91 | 0    |
| Rabgef1  | 0.84 | NA   | 3.07 | 0.52 | NA   |
| Rabggta  | 0.18 | 1.69 | 1.46 | 1.17 | 0    |
| Rabggtb  | 1.06 | 0.83 | 4.51 | 0.27 | 0    |
| Rabif    | 0.15 | 0.87 | 1.37 | 0.56 | 0.64 |
| Rabl2a   | 0.13 | NA   | NA   | NA   | NA   |
| Rabl3    | 0    | 0.92 | 0.27 | 1.06 | 0    |
| Rabl4    | 0    | NA   | NA   | NA   | NA   |
| Rabl5    | 1.47 | 1.12 | 0.97 | 2.27 | 0.74 |
| Rabl6    | NA   | 0.45 | 1.66 | 3.05 | NA   |
| Rac1     | 0.64 | 0.66 | 0.57 | 1.26 | 0.83 |
| Rac2     | 0.93 | 1.16 | 0.99 | 4.05 | 0    |
| Rac3     | 0.79 | 2.68 | 2.09 | 1.17 | 0    |
| Racgap1  | 0.83 | 1.02 | 2.16 | 0.2  | 0    |
| Rad1     | 0.3  | 0.22 | 1.63 | 2.33 | 0    |
| Rad17    | 0    | 0    | 1.38 | 0.36 | 2.8  |
| Rad18    | 1.07 | NA   | 1.18 | 0.5  | 0.91 |
| Rad21    | 4.46 | 0.47 | 4.73 | 0.4  | 1.18 |
| Rad23a   | 0.18 | 0.83 | 2.14 | NA   | 0    |
| Rad23b   | 0.01 | 0.61 | 1.58 | 1.49 | 0.04 |
| Rad50    | 0.62 | 0    | 1.59 | 0    | 2.04 |
| Rad51    | 0.36 | 0.12 | 1.2  | 0.13 | 0    |
| Rad51ap1 | 0    | 0.21 | 1.89 | 0.03 | 0.84 |
| Rad51b   | NA   | 1.05 | 0.57 | 0.14 | NA   |
| Rad51c   | 0.26 | 0.95 | 1.37 | 0    | 2.05 |
| Rad51d   | NA   | 0.08 | 0.25 | 1.72 | NA   |
| Rad5111  | 0.41 | NA   | NA   | NA   | 0    |
| Rad5113  | 0    | NA   | NA   | NA   | 1.23 |
| Rad52    | 1.38 | 1.67 | 0.65 | 0.69 | 0.9  |
| Rad54b   | NA   | 0.18 | 2.06 | NA   | 0.17 |
| Rad54l   | 0.31 | 0.41 | 2.36 | 0.26 | 1.88 |
| Rad54l2  | NA   | 0    | 0.49 | 0    | 0.8  |

|          |      |      |      |      |      |
|----------|------|------|------|------|------|
| Rad9a    | NA   | 0.32 | 1.18 | 0.83 | NA   |
| Rad9b    | 0.22 | NA   | 1.81 | 1.61 | NA   |
| Radil    | NA   | NA   | 1.29 | 1.45 | 4.51 |
| Rae1     | 1    | 0.77 | 0.85 | 1.39 | 0.1  |
| Raet1e   | 0.29 | NA   | 1.8  | 1.39 | NA   |
| Raf1     | 0.29 | 1.37 | 2.01 | 2.16 | 2.72 |
| Rag1     | 0    | 1.04 | 1.65 | NA   | 0.72 |
| Ragl1ap1 | NA   | NA   | NA   | NA   | 0.59 |
| Rag2     | 2.76 | 0.18 | 0.61 | 0    | 0    |
| Rage     | 0.34 | NA   | NA   | NA   | NA   |
| Rai1     | 0    | 1.3  | 0.56 | 1.82 | 0.76 |
| Rai14    | 0.21 | 1.4  | 3.38 | 2.04 | 1.49 |
| Rai16    | 0.67 | NA   | NA   | NA   | NA   |
| Rai2     | 3.34 | 0.59 | 2.38 | 0    | 0.09 |
| Rala     | 0.03 | 0    | 2.71 | 1.1  | 3.14 |
| Ralb     | 0.34 | 0    | 1.54 | 1.16 | 0    |
| Ralbp1   | 0.31 | 1.53 | 0.81 | 0.24 | 0.24 |
| Ralgapa1 | NA   | 0.3  | 0.81 | 0.89 | NA   |
| Ralgapa2 | NA   | NA   | 1.81 | 0    | NA   |
| Ralgapb  | NA   | 0.39 | 2.64 | 0    | NA   |
| Ralgds   | 0.2  | 2.25 | 0.73 | 1.21 | 0.04 |
| Ralgps1  | 0.76 | 0    | 0.57 | 0    | 0    |
| Ralgps2  | NA   | 3.01 | 0.84 | 0.1  | 0    |
| Raly     | 0    | 0.09 | 0.2  | NA   | 0.26 |
| Raly1    | NA   | 0.67 | 0.54 | 2.05 | 3.06 |
| Ramp1    | 1.61 | 0.85 | 1.01 | 1.9  | 2.4  |
| Ramp2    | 2.32 | 0.89 | 2.27 | 1.63 | 2.39 |
| Ramp3    | 0.82 | 1.85 | 1.4  | 0    | NA   |
| Ran      | 0.62 | 1.51 | 0.9  | 0.03 | 4.14 |
| Ranbp1   | 0    | 1.27 | 1.97 | 0    | 0.11 |
| Ranbp10  | 0.66 | 0.29 | 0.74 | 1.35 | 0    |
| Ranbp17  | 0.8  | 1.6  | 0.16 | 0.02 | 0.78 |
| Ranbp2   | 0.21 | 0.94 | 1.47 | 0    | 0    |
| Ranbp3   | NA   | 0.68 | 0.49 | 1.34 | 0.91 |
| Ranbp31  | NA   | NA   | 0.48 | 1.13 | NA   |
| Ranbp6   | 0    | 0.13 | 0.99 | 2.17 | 0    |
| Ranbp9   | 0    | 0.61 | 1.95 | 1.67 | NA   |
| Rangap1  | 0.09 | 0.13 | 0.75 | 0    | 0.74 |
| Rangnrf  | 0.34 | NA   | NA   | NA   | NA   |
| Rangrf   | NA   | 2.49 | 1.83 | NA   | 0    |
| Rap1a    | 3.78 | 1.3  | 0    | 0    | 0    |

|          |      |      |      |       |      |
|----------|------|------|------|-------|------|
| Rap1b    | 0    | 1.43 | 3.22 | 0.13  | NA   |
| Rap1gap  | NA   | 1.48 | 0.86 | 1.13  | 0    |
| Rap1gap2 | NA   | 3.06 | 0.63 | 26.37 | NA   |
| Rap1gds1 | 0    | 0.84 | 0.77 | 1.97  | 1.61 |
| Rap2a    | NA   | 0.75 | 2.81 | 1.76  | 0    |
| Rap2b    | 0    | 0.53 | 1.2  | 0     | 0    |
| Rap2c    | 0.32 | 1.07 | 3.33 | 1.2   | NA   |
| Rapgef1  | 0.39 | 0.81 | 1.45 | 0.42  | 0.89 |
| Rapgef2  | NA   | 0.94 | 2.52 | 14.52 | 0    |
| Rapgef3  | 2.45 | 1.15 | 0.87 | 2.18  | 1.38 |
| Rapgef4  | 0.2  | 1.88 | 0.64 | 1.08  | 0    |
| Rapgef5  | NA   | 0.4  | 2.12 | 1.14  | 2.16 |
| Rapgef6  | 1.25 | NA   | 1.3  | 0.3   | 1.58 |
| Rapgef11 | NA   | 0    | 2.25 | 0.1   | 2.53 |
| Raph1    | NA   | NA   | 1.31 | 1.2   | 1.39 |
| Rapsn    | 1.16 | 2.97 | 3.1  | 0.78  | 2.33 |
| Rara     | 0    | 1.17 | 1.89 | 1.81  | 0    |
| Rarb     | 0    | 0.6  | 2.58 | 0.14  | 0    |
| Rarg     | 2.04 | 0.85 | 1.4  | 1.07  | 0    |
| Rarres1  | 0.37 | 0.59 | 2.57 | 2.17  | 0    |
| Rarres2  | 0    | 1.37 | 0.89 | NA    | 1.45 |
| Rars     | 0.18 | 1.27 | 1.85 | 0.64  | 0    |
| Rars2    | NA   | 0.2  | 0.75 | 0.55  | 0    |
| Rasa1    | 0.64 | 0.96 | 3.11 | 5.35  | 3.37 |
| Rasa2    | 2.4  | 0.78 | 4.53 | 0.68  | 0    |
| Rasa3    | 1.74 | 0    | 1.5  | 2.75  | 0    |
| Rasa4    | 0.02 | 2.04 | 1.65 | 0.81  | NA   |
| Rasal1   | 1.57 | 2.87 | 2.72 | 0     | 0    |
| Rasal2   | NA   | 0.82 | 0.73 | 3.57  | 0    |
| Rasal3   | NA   | NA   | 0    | NA    | 2.16 |
| Rasd1    | 3.53 | NA   | 1.11 | 1.2   | 0.43 |
| Rasd2    | 1.26 | NA   | 1.59 | 0     | 0.22 |
| Rasef    | 0.42 | NA   | 0.94 | 0.71  | NA   |
| Rasgef1a | 0    | NA   | 1.39 | 0.61  | 0.26 |
| Rasgef1b | 0.01 | NA   | 2.43 | 0     | NA   |
| Rasgef1c | NA   | NA   | 1.41 | 0     | 5.56 |
| Rasgrf1  | 0.32 | 0.55 | 0.51 | 1.24  | 2.41 |
| Rasgrf2  | 0.7  | NA   | 0    | 2.06  | 0    |
| Rasgrp1  | 0.36 | 0    | 1.21 | 0     | 2.19 |
| Rasgrp2  | 0.58 | 0.26 | 0.39 | 0.49  | 0    |
| Rasgrp3  | 0    | 0.11 | 2.45 | 31.05 | 1.4  |

|         |      |      |      |       |      |
|---------|------|------|------|-------|------|
| Rasgrp4 | 0.1  | NA   | 0    | 1.79  | 0    |
| Rasip1  | 0.92 | 2.44 | 0    | 1.34  | 0    |
| Rasl10a | NA   | 2.17 | 0    | 0     | 0    |
| Rasl10b | 2.45 | NA   | 2.14 | 1.25  | 3.65 |
| Rasl11a | NA   | NA   | 3.43 | 0     | 0    |
| Rasl11b | 1.9  | 1.52 | 0.17 | 0     | 0.27 |
| Rasl12  | 1.33 | 0.77 | 1.46 | 0.44  | 0    |
| Rassf1  | 0.1  | 1.57 | 0.09 | NA    | 0    |
| Rassf10 | NA   | NA   | 0.28 | 0     | NA   |
| Rassf2  | 0.63 | 0.72 | 3.59 | 2.88  | 0.73 |
| Rassf3  | 1.33 | NA   | 2.73 | 0.95  | NA   |
| Rassf4  | 0.3  | 0.61 | 1.98 | 2.26  | 0.87 |
| Rassf5  | 0.55 | NA   | 3.12 | 2.1   | 0    |
| Rassf6  | 0.74 | NA   | 1.23 | 1     | 0.59 |
| Rassf7  | NA   | 0.52 | 3.8  | 0.83  | 0    |
| Rassf8  | NA   | 0.49 | 2.25 | 1.26  | 1    |
| Rassf9  | NA   | 1.08 | 1.9  | 0.15  | 2.97 |
| Raver1  | NA   | NA   | 0    | 0.64  | 2.96 |
| Raver2  | NA   | NA   | NA   | 0.67  | NA   |
| Rax     | 0.58 | 1.02 | 0    | 8.2   | 5.24 |
| Rb1     | 0    | 1.21 | 1.47 | 1.91  | 0    |
| Rb1cc1  | 0.91 | 1.06 | 0.63 | 0.2   | 0    |
| Rbak    | 1.67 | NA   | 1.86 | 0     | 4.77 |
| Rbbp4   | 1.68 | 0.05 | 0    | NA    | 0    |
| Rbbp5   | 2.09 | 1.76 | 1.48 | 16.89 | 0    |
| Rbbp6   | 0.55 | 0    | 1.65 | 0     | 0.77 |
| Rbbp7   | 0.07 | 0    | 0.64 | 1     | 3.53 |
| Rbbp8   | NA   | 0.02 | 0.77 | 0.59  | 3.47 |
| Rbbp8nl | NA   | NA   | NA   | 0.96  | NA   |
| Rbbp9   | 0.16 | 1.29 | 2.26 | 0.76  | 0.92 |
| Rbck1   | NA   | 3.69 | 2.4  | 0.44  | 0    |
| Rbfa    | NA   | 0    | 2.08 | 1.18  | NA   |
| Rbfox1  | NA   | 0.76 | 0.48 | 0.9   | NA   |
| Rbfox2  | NA   | 0.02 | 0.08 | 0     | NA   |
| Rbfox3  | NA   | NA   | 1.02 | 1.23  | NA   |
| Rbks    | 0.92 | 0    | 2.88 | NA    | 1.56 |
| Rbl1    | 0    | 1.34 | 0.69 | 0     | 3.01 |
| Rbl2    | 0    | 0    | 1.75 | NA    | 1.64 |
| Rbm10   | 1.44 | 1.06 | 0.43 | 0.76  | 1.62 |
| Rbm11   | 1.55 | NA   | 0.86 | 0     | 0.57 |
| Rbm12   | 0.38 | 0.99 | 0    | NA    | 0    |



|        |      |      |      |      |      |
|--------|------|------|------|------|------|
| Rbm12b | NA   | NA   | NA   | NA   | 0.49 |
| Rbm14  | 0    | 0.48 | 1.62 | 2.63 | 0    |
| Rbm15  | 0.03 | 0.34 | 0.1  | 0    | 0    |
| Rbm15b | NA   | 0    | 0    | 1.55 | 0    |
| Rbm16  | 0    | NA   | NA   | NA   | 0    |
| Rbm17  | 0.14 | 0    | 1.02 | 0.56 | 2.31 |
| Rbm18  | 0.09 | NA   | 0.98 | 0.55 | 2.11 |
| Rbm19  | 0.74 | 2.32 | 1.58 | 0.74 | 0    |
| Rbm20  | NA   | NA   | 1.11 | NA   | 0    |
| Rbm22  | 0    | 0.91 | 0    | 0.96 | 1.96 |
| Rbm24  | NA   | NA   | 1.44 | 1    | 0.02 |
| Rbm25  | NA   | 0.77 | 1.22 | 0.61 | 0.99 |
| Rbm26  | NA   | 0.48 | 0.71 | 0.42 | 0    |
| Rbm27  | NA   | NA   | 0.9  | 2.13 | 1.32 |
| Rbm28  | 0.03 | 0    | 1.38 | 0.88 | 1.94 |
| Rbm3   | 0.29 | 0.7  | 1.03 | 0.76 | 0    |
| Rbm33  | NA   | NA   | 1.03 | 1.22 | 0    |
| Rbm34  | NA   | 0.98 | 0    | 0    | 1.49 |
| Rbm38  | NA   | 0.25 | 2.83 | NA   | 0    |
| Rbm39  | NA   | 0.73 | 0.35 | 0.4  | 0.89 |
| Rbm4   | 0.17 | 0.56 | 0.61 | 5.35 | 0    |
| Rbm41  | NA   | 0.31 | 0.47 | 0.39 | 1.07 |
| Rbm42  | NA   | 0.69 | 0.24 | 1.83 | 0.03 |
| Rbm43  | NA   | NA   | 3.12 | 0    | 2.24 |
| Rbm44  | NA   | NA   | NA   | 0    | NA   |
| Rbm45  | NA   | NA   | 0.49 | 0.75 | 0.93 |
| Rbm46  | NA   | NA   | 1.48 | NA   | NA   |
| Rbm47  | NA   | 0.01 | 2.35 | 0.31 | 0    |
| Rbm48  | NA   | 0.18 | 3.2  | 0.75 | NA   |
| Rbm4b  | NA   | 0    | 0.68 | 0.44 | 1.42 |
| Rbm5   | 0.65 | 0.39 | 1.47 | 0    | 0.16 |
| Rbm6   | 0    | 0    | 0.54 | 1.09 | 1.02 |
| Rbm7   | 2.03 | 0.93 | 2.33 | 0.71 | 2.38 |
| Rbm8a  | NA   | 1.01 | 1.85 | 0.61 | 1.55 |
| Rbm9   | 0.74 | NA   | NA   | NA   | 0    |
| Rbms1  | 0.45 | 0    | 4.78 | 4.3  | 0    |
| Rbms2  | 0.63 | 1.46 | 0    | 2.16 | 0    |
| Rbms3  | 0.7  | 1.1  | 1.24 | 0.99 | 0.02 |
| RbmX   | 0    | 1.4  | 0.71 | NA   | 2.61 |
| RbmX2  | 0.32 | 0.76 | 1.49 | 0.85 | 3.1  |
| RbmX11 | NA   | NA   | 0.56 | 0.62 | NA   |

|         |       |      |      |       |      |
|---------|-------|------|------|-------|------|
| Rbmx12  | NA    | 1.61 | 1.48 | 2.4   | NA   |
| Rbmy1a1 | 2.73  | NA   | NA   | NA    | NA   |
| Rbp1    | 0.36  | 1.63 | 1.39 | 4.53  | 0    |
| Rbp2    | 0.38  | NA   | 9.4  | 4.26  | 0    |
| Rbp3    | 2.71  | 1.11 | 1.04 | 1.98  | 0    |
| Rbp4    | 5.9   | 2.38 | 0.92 | 1.15  | 8.76 |
| Rbp7    | 0.26  | NA   | 3.41 | 3.43  | 7.43 |
| Rbpj    | NA    | 0.35 | 0.03 | 0.29  | 0    |
| Rbpjl   | NA    | 0    | 1.56 | 1.38  | 0    |
| Rbpms   | 0.59  | 0.78 | 2.07 | 16.63 | 1.75 |
| Rbpms2  | 0     | NA   | 1.23 | 1     | 1.61 |
| Rbx1    | 0.65  | 0    | 1.32 | 0     | 0    |
| Rc3h1   | NA    | NA   | 3.54 | 1.56  | 1.62 |
| Rc3h2   | NA    | 0.51 | 0.79 | 0.4   | 0.52 |
| Rcan1   | NA    | 0.93 | 1.64 | 0.72  | 1.12 |
| Rcan2   | NA    | 0.81 | 0.47 | 0.49  | 1.72 |
| Rcan3   | NA    | 0    | 1.14 | NA    | 0    |
| Rcbtb1  | 4.52  | 1.71 | 0.93 | 0.45  | 0    |
| Rcbtb2  | NA    | 1.06 | 0.88 | 0.18  | 1.99 |
| Rcc1    | NA    | 1.85 | 0.84 | NA    | NA   |
| Rcc2    | NA    | NA   | 0.54 | 1.33  | 5.55 |
| Rccd1   | NA    | NA   | 0.41 | 1.61  | NA   |
| Rce1    | 0.05  | 0.67 | 3.89 | NA    | 2.63 |
| Rchyl   | 0.06  | 3.32 | 1.27 | NA    | 0    |
| Rcl1    | 0.65  | 1.62 | 2.38 | 1.59  | 0    |
| Ren1    | NA    | 0.93 | 0.97 | 0.97  | 4.13 |
| Ren2    | 0.6   | 0.77 | 0.21 | 1.06  | 0    |
| Ren3    | 14.38 | 2.03 | 2.3  | 3.08  | 0    |
| Rcor1   | 2.08  | 0.52 | 0.27 | 0.2   | 0.61 |
| Rcor2   | NA    | NA   | 1.2  | 0.19  | 3.22 |
| Rcor3   | 0     | 0.75 | 1.4  | 0.59  | 0    |
| Rcsd1   | NA    | NA   | 0.2  | 0     | 1.54 |
| Rcvrn   | 1.08  | 1.24 | 0.74 | 1.64  | 2.49 |
| Rd3     | NA    | NA   | 1.22 | 1.77  | 1.6  |
| Rdbp    | 0.72  | NA   | NA   | NA    | 0.84 |
| Rdh10   | 0.26  | NA   | 0.6  | 0     | 0    |
| Rdh11   | 0.51  | 0.8  | 1.23 | 0     | 2.28 |
| Rdh12   | 0.62  | NA   | 1.05 | 0.74  | 1.12 |
| Rdh13   | 1.05  | NA   | 2.03 | 1.88  | 1.35 |
| Rdh14   | 0.39  | 1.54 | 0.89 | 0.21  | 2.17 |
| Rdh16   | NA    | 1.32 | 0    | 0.02  | 2.35 |

|        |      |      |      |       |      |
|--------|------|------|------|-------|------|
| Rdh5   | 0.75 | 1.81 | 1.15 | 1.23  | 0    |
| Rdh8   | NA   | NA   | NA   | 2.87  | NA   |
| Rdhe2  | 0.88 | NA   | NA   | NA    | NA   |
| Rdm1   | NA   | NA   | 2.9  | 1.27  | 1.16 |
| Rdx    | 1.35 | 1.5  | 0.92 | NA    | 0.62 |
| Rec8   | NA   | 0    | 0.3  | 4.19  | 3.35 |
| Rec8l1 | 5.11 | NA   | NA   | NA    | NA   |
| Reck   | 2.83 | 1.26 | 1.49 | 0     | 5.16 |
| Recql  | 0    | 1.17 | 1.53 | NA    | 1.98 |
| Recql4 | 1.47 | 2.32 | 1.31 | 1.18  | 3.14 |
| Recql5 | 0.86 | 0.89 | 0.68 | 1.76  | 0.13 |
| Reep1  | NA   | 0.33 | 1.45 | 2.04  | 1.08 |
| Reep2  | NA   | 3.79 | 3.02 | 1.63  | 1.61 |
| Reep3  | NA   | NA   | 4.34 | 0.93  | 2.05 |
| Reep4  | NA   | 3.02 | 0    | 5.2   | 0    |
| Reep5  | NA   | 0    | 3.33 | 0.06  | 0.45 |
| Reep6  | NA   | NA   | 1.07 | 1.81  | 2.16 |
| Reg3a  | 1.42 | 3.7  | 0.81 | 0.86  | 1.16 |
| Reg3g  | 0    | NA   | 1.96 | 0.56  | 2.95 |
| Reg4   | 0    | NA   | 0.94 | 0.8   | 0    |
| Rel    | 0.21 | 0.72 | 2.82 | 0.75  | 0.3  |
| Rela   | 0    | 2.46 | 2.56 | 0.48  | 0    |
| Relb   | 0.03 | 1.12 | 2.58 | 5.27  | 0    |
| Rell1  | NA   | NA   | 0.98 | 0     | 0    |
| Rell2  | NA   | NA   | 1.32 | NA    | NA   |
| Reln   | 0.77 | 2.68 | 1.51 | 0     | 1.55 |
| Relt   | NA   | NA   | 2.28 | 2.11  | 0    |
| Rem1   | 0.27 | 0.21 | 3.54 | 0.85  | 3    |
| Rem2   | 1.13 | NA   | 1.14 | 0.78  | 1.39 |
| Renbp  | 0.19 | 2.74 | 3.97 | 1.4   | 0.5  |
| Rep15  | NA   | NA   | NA   | 0.55  | NA   |
| Repin1 | 0.39 | 0    | 0.22 | 1.5   | 2.32 |
| Reps1  | 0    | 0    | 0    | 13.03 | 1.09 |
| Reps2  | 0    | 1.95 | 1.16 | 0.88  | 4.09 |
| Rer1   | NA   | 1.24 | 1.81 | 0.64  | 1.88 |
| Rere   | 0.03 | 1.42 | 1.51 | 0.92  | 1.13 |
| Rerg   | 0.77 | NA   | 0.94 | 2.12  | 1.99 |
| Rergl  | NA   | NA   | NA   | 1.55  | NA   |
| Resp18 | 0    | NA   | NA   | 0.89  | NA   |
| Rest   | 2.3  | 0.42 | 1.46 | 2.56  | 0    |
| Ret    | 2.94 | 0.6  | 0.1  | 1.88  | 0    |

|         |      |      |      |      |      |
|---------|------|------|------|------|------|
| Retn    | 1.44 | 0    | 1.57 | 0.48 | 0    |
| Retnlb  | 0.61 | NA   | 0.55 | 2.08 | 0    |
| Retsat  | NA   | 0    | 1.74 | 1.34 | 3.4  |
| Rev1    | NA   | 0    | 0.95 | NA   | 1.73 |
| Rev31   | 1    | 0.11 | 0.98 | 0.49 | 0    |
| Rexo1   | NA   | NA   | 0.75 | 2.05 | 0    |
| Rexo2   | NA   | 1.41 | 1.07 | 0.13 | 0    |
| Rexo4   | NA   | 0    | 1.4  | 1.2  | 0.09 |
| Rfc1    | NA   | 0    | 1.55 | 0.79 | 0    |
| Rfc2    | 0.23 | 1.2  | 2.58 | 1.06 | 0    |
| Rfc3    | 0    | 2.06 | 2.05 | 0.42 | 4.7  |
| Rfc4    | 0    | 1.65 | 1.38 | 2.2  | 3.58 |
| Rfc5    | 0.4  | 0    | 3.02 | 0.6  | 0    |
| Rfesd   | NA   | NA   | 0.39 | 0.35 | 1.58 |
| Rffl    | NA   | NA   | 0.31 | 0    | 0    |
| Rfk     | 1.22 | 2.31 | 1.54 | 1.58 | 0    |
| Rfng    | 0.01 | 1.86 | 2.14 | 2.14 | 0.71 |
| Rfpl4b  | NA   | NA   | NA   | 3.46 | NA   |
| Rft1    | NA   | NA   | NA   | 0.09 | NA   |
| Rftn1   | NA   | 0    | 1.92 | 0    | 0    |
| Rftn2   | NA   | NA   | 0    | 0.76 | 1.28 |
| Rfwd2   | NA   | NA   | 2.54 | 0.8  | 2.6  |
| Rfwd3   | NA   | 0.05 | 2.33 | 0    | 1.52 |
| Rfx1    | 0.49 | 2.46 | 0.86 | 0    | 0.02 |
| Rfx2    | 1.14 | 2.04 | 0.73 | 1.19 | 2.57 |
| Rfx3    | 0    | 1.19 | 0.7  | 0.51 | 0    |
| Rfx4    | 0.11 | NA   | 1.93 | 0.12 | 2.63 |
| Rfx5    | 0.54 | 0    | 2.02 | 0.7  | 1.59 |
| Rfx6    | NA   | NA   | NA   | 3.75 | NA   |
| Rfx7    | NA   | 2.11 | 0.76 | 2.18 | 0    |
| Rfx8    | NA   | NA   | NA   | 1.63 | NA   |
| Rfxank  | 7.04 | 2.46 | 1.54 | NA   | 2.13 |
| Rfxap   | 0    | 1.16 | 0    | 0.97 | 0    |
| Rfxdc1  | 0.07 | NA   | NA   | NA   | NA   |
| Rg9mtd1 | 0.62 | NA   | NA   | NA   | 0    |
| Rg9mtd2 | 0.81 | NA   | NA   | NA   | 2.21 |
| Rg9mtd3 | 0.19 | NA   | NA   | NA   | 1.3  |
| Rgag1   | NA   | NA   | NA   | 0.85 | NA   |
| Rgag4   | NA   | NA   | 3.59 | 1.55 | 2.59 |
| Rgcc    | NA   | 1.59 | 4.97 | 2.42 | NA   |
| Rgl1    | 0.56 | 0    | 3.99 | 0.72 | 0    |

|        |      |      |      |       |       |
|--------|------|------|------|-------|-------|
| Rgl2   | 0    | 4.37 | 4.85 | 1.4   | 1.48  |
| Rgl3   | NA   | NA   | 0.75 | 1.49  | 6.83  |
| Rgma   | 3.34 | NA   | 0    | 1.31  | 0     |
| Rgmb   | 0    | NA   | 0.99 | 4.47  | 0.18  |
| Rgn    | 0.96 | 2.01 | 0.84 | 0     | 5.76  |
| Rgnef  | 0.45 | NA   | NA   | NA    | 1.72  |
| Rgp1   | NA   | 0.84 | 4.06 | NA    | 0     |
| Rgr    | 0    | 0    | 1.69 | 3.73  | 0     |
| Rgs1   | 1.1  | 0.87 | 2.63 | 0.12  | 0     |
| Rgs10  | 0.49 | 1.3  | 2.9  | 2.83  | 0     |
| Rgs11  | 0    | 2    | 0.97 | 2.79  | 0     |
| Rgs12  | 0.88 | 0.76 | 0.55 | 0.81  | 0     |
| Rgs13  | 0    | 1.1  | 3.91 | 16.04 | 0.19  |
| Rgs14  | 0.84 | 1.24 | 0.55 | 0.94  | 0     |
| Rgs16  | 0.06 | 0.89 | 2.04 | 1.63  | 1.73  |
| Rgs17  | 1.48 | 1.65 | 2.65 | 0.35  | 0.91  |
| Rgs18  | 0    | NA   | 0.85 | 1.98  | 0.33  |
| Rgs19  | 0    | 0    | 1.6  | 1.83  | 0.63  |
| Rgs2   | 1.53 | 1.6  | 1.41 | 0     | 1.05  |
| Rgs20  | 0    | 1.07 | 0.65 | 0.96  | 0     |
| Rgs21  | NA   | NA   | NA   | 4.96  | NA    |
| Rgs22  | NA   | NA   | NA   | 0.97  | NA    |
| Rgs3   | 0.41 | 0.69 | 0.72 | 1.03  | 0.5   |
| Rgs4   | 0.1  | 0.42 | 0.12 | 1.93  | 2.36  |
| Rgs5   | 0.51 | 0.9  | 0.53 | 0.51  | 1.97  |
| Rgs6   | 1.44 | 0.76 | 0.61 | 3.34  | 0     |
| Rgs7   | 0    | 0.05 | 1.06 | 0     | 3     |
| Rgs7bp | NA   | NA   | 1.56 | 2.19  | 1.06  |
| Rgs8   | NA   | NA   | 3.16 | 2.73  | 8.15  |
| Rgs9   | 0    | 0    | 0.27 | 1.05  | 0.9   |
| Rgs9bp | 0.25 | NA   | 0.39 | 1.8   | NA    |
| Rgs12  | 1.96 | NA   | NA   | NA    | NA    |
| Rhag   | 1.47 | 1.16 | 1.32 | 0.94  | 1     |
| Rhbdd1 | NA   | NA   | 0.7  | 1.21  | 1.63  |
| Rhbdd2 | NA   | NA   | 0    | 1.18  | 0.95  |
| Rhbdd3 | NA   | 1.88 | 1.64 | 2.18  | 0     |
| Rhbdf1 | 2.31 | 3.2  | 0.48 | 1.05  | 3.25  |
| Rhbdf2 | NA   | 0    | 1.01 | 2.44  | 0     |
| Rhbd11 | NA   | 2.95 | 0.55 | 1.72  | 14.29 |
| Rhbd12 | NA   | NA   | 0.31 | 0     | NA    |
| Rhbd13 | NA   | NA   | 0.72 | 1.37  | 0     |

|         |       |      |      |      |       |
|---------|-------|------|------|------|-------|
| Rhbg    | 1.2   | 0.05 | 1.82 | 0.54 | 14.86 |
| Rhcg    | 1.17  | 2.65 | 0.8  | 0    | 5.05  |
| Rhd     | NA    | 2.44 | 0.04 | 2.74 | 1.6   |
| Rheb    | 1.7   | 0.37 | 2.36 | 1.02 | NA    |
| Rhebl1  | 1.62  | NA   | 0    | 0.43 | NA    |
| Rhno1   | NA    | NA   | 0.15 | 1.34 | NA    |
| Rho     | 18.48 | 0.79 | 0.01 | 2.06 | 0     |
| Rhoa    | 0     | 1.26 | 0.12 | 0    | 0     |
| Rhob    | 0.35  | 2.14 | 2.84 | 0.19 | 0     |
| Rhobtb1 | 2.1   | 2.13 | 0.59 | 0    | 0     |
| Rhobtb2 | 0.59  | 0    | 1.41 | 2.85 | 1.14  |
| Rhobtb3 | 0.04  | 0.58 | 0.07 | 0.77 | 0.01  |
| Rhoc    | 0.73  | 2.33 | 1.3  | 0    | 0.37  |
| Rhod    | NA    | 1.16 | 2.51 | 1.41 | 0     |
| Rhof    | 0.39  | 0    | 3.86 | NA   | 0     |
| Rhog    | 1.66  | 0.21 | 2.15 | 7.5  | 0     |
| Rhoh    | 1.38  | 0    | 1.21 | 0.2  | 0     |
| Rhoj    | 0     | NA   | 1.39 | 2.81 | 1.86  |
| Rhoq    | 3.16  | 1.26 | 1.26 | 0.51 | 0.06  |
| Rhot1   | 0.62  | 1.28 | 1.14 | 1.44 | 0.52  |
| Rhot2   | 0.97  | 0    | 5.5  | 2.79 | 0     |
| Rhou    | 1.39  | NA   | 2.92 | 1.45 | 1.71  |
| Rhov    | 0.61  | NA   | 3.86 | 1.55 | 0     |
| Rhpn1   | 0     | NA   | 1.94 | 0    | 0     |
| Rhpn2   | 0.76  | NA   | 2.5  | 1.21 | 0.1   |
| Ribc1   | 0.89  | NA   | 0.53 | 1.79 | 0     |
| Ribc2   | 0.9   | 0.95 | 1.04 | 0.57 | 0     |
| Ric3    | NA    | 0    | 1.06 | 2.03 | 1.19  |
| Ric8b   | NA    | 0    | 0.44 | 0.75 | 1.37  |
| Rictor  | NA    | NA   | 0.77 | 1.02 | 0.59  |
| Rif1    | NA    | 1.25 | 1.28 | 0.27 | 0     |
| Riiad1  | NA    | NA   | 1.91 | 0    | NA    |
| Rilp    | NA    | NA   | 1.66 | 1.87 | 1.32  |
| Rilpl1  | NA    | NA   | 0.36 | 0    | 0.39  |
| Rilpl2  | NA    | NA   | 2.17 | 0.59 | 0     |
| Rimbp2  | NA    | 0.73 | 0.69 | 0.7  | 3.78  |
| Rimbp3  | NA    | NA   | NA   | 1.31 | NA    |
| Rimkla  | NA    | NA   | 1.11 | 0.87 | 0     |
| Rimklb  | NA    | NA   | 0.75 | 1.5  | 0     |
| Rims1   | 0     | 0.07 | 0.27 | 1.1  | 1.74  |
| Rims2   | 0.75  | 0.59 | 0.9  | 0    | 1.76  |

|         |      |      |      |      |      |
|---------|------|------|------|------|------|
| Rims3   | 0.94 | 0.41 | 0.97 | 0    | 0.53 |
| Rims4   | 0.97 | NA   | 1.27 | 1.45 | 1.07 |
| Rin1    | 0.82 | 1.46 | 1.01 | 2.49 | 0    |
| Rin2    | 0    | 2.07 | 4.17 | 0    | NA   |
| Rin3    | 0.77 | 1.49 | 3.01 | 1.52 | 0    |
| Ring1   | 0.57 | 0    | 0.22 | 1.04 | 0    |
| Rinl    | NA   | NA   | NA   | 5.93 | NA   |
| Rint1   | NA   | 0.08 | 0.36 | 0.82 | 0    |
| Riok1   | 0.7  | NA   | 1.5  | 1.04 | 1.47 |
| Riok2   | 1.22 | 0.81 | 2.3  | 0.67 | 2.65 |
| Riok3   | 0.72 | 0.97 | 1.51 | 1.98 | 0    |
| Ripk1   | 1.45 | 1.69 | 1.17 | 0.47 | 0    |
| Ripk2   | 0    | 0.57 | 3.98 | 0.82 | 4.64 |
| Ripk3   | 0.23 | NA   | 1.89 | 1.34 | 0.44 |
| Ripk4   | 3.25 | 0.53 | 2.45 | 0.75 | 0    |
| Ripk5   | 1.44 | NA   | NA   | NA   | NA   |
| Ripply1 | NA   | NA   | NA   | 0.74 | NA   |
| Ripply2 | NA   | NA   | 0.54 | 0.75 | 2.84 |
| Ripply3 | NA   | 0    | 1.92 | 2.84 | NA   |
| Rit1    | 0.1  | 4.27 | 0.6  | 2.58 | 0.71 |
| Rit2    | 0.17 | 0.68 | 0.75 | 0.34 | 0    |
| Rkhd1   | 0    | NA   | NA   | NA   | NA   |
| Rkhd2   | 1.34 | NA   | NA   | NA   | NA   |
| Rkhd3   | 1.32 | NA   | NA   | NA   | NA   |
| Rlbp1   | 1.24 | 0.72 | 1.04 | 0.71 | 0    |
| Rlf     | NA   | 0.93 | 0.52 | 1.56 | 0    |
| Rlim    | NA   | 1.56 | 0.43 | 0.72 | 0    |
| Rln1    | 1.65 | 5.16 | 1.25 | 2.12 | 1.52 |
| Rln3    | 1.03 | NA   | NA   | 3.46 | NA   |
| Rltpr   | NA   | NA   | 0.7  | 1.13 | 0.82 |
| Rmdn1   | NA   | 0.55 | 0.79 | 1.61 | NA   |
| Rmdn2   | NA   | NA   | 1.26 | 0.87 | NA   |
| Rmdn3   | NA   | 2.29 | 0.05 | 0.57 | NA   |
| Rmi1    | NA   | 2.25 | 1.34 | 0.02 | 0    |
| Rmi2    | NA   | NA   | 0    | 0.07 | NA   |
| Rmnd1   | NA   | 2.41 | 1.95 | NA   | 0    |
| Rmnd5a  | NA   | 0.36 | 0.38 | 0.1  | 0    |
| Rmnd5b  | NA   | 1.21 | 1.64 | 0.54 | 2.05 |
| Rmrp    | NA   | NA   | NA   | 0    | NA   |
| Rmst    | NA   | NA   | 1.07 | NA   | 2.79 |
| Rn7sk   | NA   | NA   | NA   | 0    | NA   |

|          |      |      |      |      |      |
|----------|------|------|------|------|------|
| Rnase1   | 3.84 | 0.99 | 0    | 0.85 | 0    |
| Rnase10  | NA   | NA   | NA   | 0.94 | NA   |
| Rnase12  | NA   | NA   | NA   | 0.38 | NA   |
| Rnase13  | NA   | NA   | NA   | 3.33 | NA   |
| Rnase2   | 0    | NA   | NA   | NA   | NA   |
| Rnase4   | 0.74 | 0.34 | 2.34 | 0.36 | 0.48 |
| Rnase6   | 0.1  | 0.62 | 1.21 | 3.11 | 0    |
| Rnase9   | 6.86 | NA   | NA   | 0.74 | NA   |
| Rnaseh1  | 0.46 | 1.13 | 0.54 | 0.53 | 0    |
| Rnaseh2a | 0.14 | 0    | 2    | 0.67 | 0    |
| Rnaseh2b | NA   | 2.14 | 0.68 | 0.98 | 0.03 |
| Rnaseh2c | NA   | NA   | 2.21 | 0    | 1.21 |
| Rnasek   | NA   | NA   | 1.55 | 0    | 1.49 |
| Rnase1   | 0    | 0    | 2.01 | 0.51 | 0    |
| Rnasen   | NA   | NA   | NA   | NA   | 0    |
| Rnaset2  | 1.06 | NA   | NA   | NA   | NA   |
| Rnd1     | 0    | 1.26 | 1.53 | 1.45 | 0    |
| Rnd2     | NA   | 2.31 | 1.64 | 0.59 | 1.68 |
| Rnd3     | NA   | 0.34 | 1.76 | 0.26 | 5.71 |
| Rnf10    | 0    | 0.39 | 0.69 | 0    | 0    |
| Rnf103   | 0.71 | 0.11 | 0    | 0    | 0    |
| Rnf11    | 0    | 1.47 | 2.07 | 0.57 | 1.22 |
| Rnf111   | 1.02 | 0.65 | 2.05 | 0.78 | 0.61 |
| Rnf112   | NA   | NA   | 0.03 | 0.31 | 0.56 |
| Rnf114   | NA   | 0.76 | 0.09 | 0    | 1.24 |
| Rnf115   | NA   | 0.96 | 1    | 0    | 2.77 |
| Rnf12    | 2.38 | NA   | NA   | NA   | NA   |
| Rnf121   | 0.54 | 1.83 | 0.36 | 6.3  | 2.69 |
| Rnf122   | 1.6  | 3.11 | 2.11 | 0.11 | 1.14 |
| Rnf123   | 0.61 | 0.59 | 0.33 | 1.56 | 1.59 |
| Rnf125   | 0.78 | 1.39 | 0.19 | 1.39 | 6.22 |
| Rnf126   | 0.02 | 0.22 | 4.39 | 1.6  | NA   |
| Rnf128   | 0    | 1.56 | 3.62 | 0.15 | 0.64 |
| Rnf13    | 1.68 | 1.3  | 1.25 | 0.73 | 0    |
| Rnf130   | 0.21 | 0    | 1.24 | 1.24 | 0.4  |
| Rnf133   | 2.57 | NA   | 0    | 1.85 | 0    |
| Rnf135   | NA   | NA   | 3.01 | 1.19 | 0    |
| Rnf138   | 0.22 | 2.77 | 1.57 | 0.53 | 1.49 |
| Rnf139   | 1.41 | 1.3  | 1.39 | 0    | 2.3  |
| Rnf14    | 0.84 | 2.35 | 0.41 | 1.56 | 2.44 |
| Rnf141   | 0.31 | 0.84 | 0    | 0.88 | 2.12 |



|         |      |      |      |      |      |
|---------|------|------|------|------|------|
| Rnf144  | 2.19 | NA   | NA   | NA   | NA   |
| Rnf144a | NA   | 1.01 | 0.94 | 0    | 0    |
| Rnf144b | NA   | NA   | 1.95 | 0    | 1.93 |
| Rnf145  | NA   | NA   | 1.7  | 0.89 | 1.3  |
| Rnf146  | 0    | 1.78 | 2.1  | 1.65 | 0.59 |
| Rnf148  | 0.15 | NA   | 3.72 | 1.8  | 6.44 |
| Rnf149  | 1.02 | NA   | 1.99 | 0    | 0    |
| Rnf150  | 1.07 | NA   | 1.18 | 1.95 | 1.74 |
| Rnf151  | 3.21 | NA   | 1.89 | 0    | 0    |
| Rnf152  | NA   | NA   | 0.8  | 1.63 | NA   |
| Rnf157  | 2.13 | NA   | 3.45 | 2.3  | 1.74 |
| Rnf160  | NA   | NA   | NA   | NA   | 0    |
| Rnf165  | NA   | NA   | 0.06 | 1.83 | 0.91 |
| Rnf166  | 0    | NA   | 1.58 | 1.32 | 0    |
| Rnf167  | NA   | 1.97 | 2.51 | 1.1  | 0    |
| Rnf168  | NA   | NA   | 0.9  | 0.63 | NA   |
| Rnf169  | NA   | NA   | 2.74 | 0    | 4.36 |
| Rnf17   | 0    | 0.62 | 0.41 | 1.52 | 0    |
| Rnf170  | NA   | 1.46 | 1.05 | 0.78 | 0    |
| Rnf180  | NA   | NA   | 1.15 | 3.47 | 0    |
| Rnf181  | NA   | NA   | 0.98 | 1.26 | 0.17 |
| Rnf182  | NA   | NA   | 0    | 1.57 | 1.01 |
| Rnf183  | NA   | NA   | 0    | 0.07 | 2.79 |
| Rnf185  | NA   | 0.35 | 1.55 | 0.98 | 0    |
| Rnf186  | NA   | 0.86 | 8.38 | 0    | 1.42 |
| Rnf187  | NA   | 0.14 | 1.48 | 2.59 | 0.86 |
| Rnf19   | 0.38 | NA   | NA   | NA   | NA   |
| Rnf19a  | NA   | 1.55 | 2.77 | 0    | 5.26 |
| Rnf19b  | NA   | 1.54 | 2.14 | 0.92 | 0    |
| Rnf2    | 9.5  | 2.12 | 0.52 | 0.36 | 0    |
| Rnf20   | 1.5  | NA   | 0    | 0.33 | 0    |
| Rnf207  | NA   | NA   | 1.31 | 0.35 | 2.81 |
| Rnf208  | NA   | 1.84 | 0    | 0.33 | 5.09 |
| Rnf212  | NA   | NA   | NA   | 0.56 | NA   |
| Rnf213  | NA   | NA   | 0.75 | 0    | 0.19 |
| Rnf214  | NA   | NA   | 1.33 | 0.89 | 0    |
| Rnf215  | NA   | NA   | 0.6  | 0.89 | 1.48 |
| Rnf216  | NA   | 0    | 1.26 | 0    | 2.02 |
| Rnf217  | NA   | NA   | 1.15 | 0    | 1.71 |
| Rnf219  | NA   | 1.17 | 0.63 | 0.19 | 1.23 |
| Rnf220  | NA   | 0.95 | 0.37 | 7.32 | 0    |

|         |      |      |      |      |      |
|---------|------|------|------|------|------|
| Rnf222  | NA   | NA   | NA   | 1.17 | NA   |
| Rnf24   | 0    | 0    | 0.83 | 0    | 0    |
| Rnf25   | 0.5  | 1.43 | 1.77 | 0.51 | 4.92 |
| Rnf26   | 0.13 | NA   | 1.92 | 0.55 | 0    |
| Rnf31   | 0.06 | 2.6  | 1.83 | 1.31 | 0    |
| Rnf32   | 0.77 | 2.04 | 1.78 | 1.36 | 1.88 |
| Rnf34   | 0.27 | 1.73 | 1.43 | 0    | 2.32 |
| Rnf38   | 0    | 0    | 2.27 | 0.68 | 1.37 |
| Rnf39   | NA   | 1.19 | 0.01 | 1.78 | 0    |
| Rnf4    | 0.75 | 1.92 | 0.59 | 0.63 | 4.26 |
| Rnf40   | 0.11 | 1.41 | 1.54 | 0.43 | 0.86 |
| Rnf41   | 1.93 | 0.72 | 0.09 | 0    | 1.29 |
| Rnf43   | NA   | 1.14 | 1.23 | 2.95 | 0    |
| Rnf44   | 0.18 | 0    | 1.14 | 1.52 | 5.74 |
| Rnf5    | NA   | 0    | 1.93 | NA   | 0.15 |
| Rnf6    | 0.32 | 0.81 | 0.07 | 0.77 | 1.14 |
| Rnf7    | 0.4  | 0    | 1.69 | 2.49 | 1.14 |
| Rnf8    | 1.76 | 1    | 1.44 | 0.89 | NA   |
| Rnft1   | NA   | 2.53 | 4.55 | 0.66 | 0    |
| Rnft2   | NA   | 4.9  | 2.26 | 0    | 1.32 |
| Rngtt   | 0    | 0.5  | 0.74 | 0.62 | 0.12 |
| Rnh1    | 0    | 2.77 | 0    | NA   | 0    |
| Rnls    | NA   | 1.85 | 0.5  | 4.45 | 1.76 |
| Rnmt    | 0    | 0.05 | 1.01 | 0.91 | 0    |
| Rnmtl1  | NA   | 0.33 | 1.24 | 0.76 | 0    |
| Rnpc2   | 0.68 | NA   | NA   | NA   | NA   |
| Rnpc3   | NA   | NA   | 0.59 | 1.8  | 0    |
| Rnpep   | 0.89 | 3.93 | 5.36 | 0    | 0    |
| Rnpepl1 | 0.93 | 0.64 | 1.3  | 0.9  | 0.08 |
| Rnps1   | 0.15 | 2.09 | 1.17 | 0.04 | 0    |
| Rnu12   | NA   | NA   | NA   | 0    | NA   |
| Robld3  | NA   | NA   | NA   | NA   | 0    |
| Robo1   | 0.4  | 1.99 | 0    | 0    | 0.98 |
| Robo2   | 1.65 | NA   | 0.45 | 0    | 3.78 |
| Robo3   | 4.14 | 2.02 | 2.01 | 0.27 | 0.66 |
| Robo4   | 0    | 2.56 | 1.99 | 1.61 | 0    |
| Rock1   | 0.93 | 0.38 | 1.35 | 1.3  | 0.69 |
| Rock2   | 1.6  | 2.66 | 0.96 | 0    | 0.77 |
| Rod1    | 0.6  | NA   | NA   | NA   | 1.14 |
| Rogdi   | NA   | 1.26 | 1.79 | 0    | 3.36 |
| Rom1    | 2.69 | 3.88 | 1.4  | 0.43 | 0    |

|          |      |      |      |      |      |
|----------|------|------|------|------|------|
| Romo1    | NA   | NA   | 3.02 | 0    | 3.03 |
| Ropn1    | 0    | NA   | 0.04 | NA   | 0.39 |
| Ropn11   | 2.66 | NA   | 0.61 | 2.97 | 0    |
| Ror1     | 0.33 | 0.33 | 0.71 | 0.6  | 1.46 |
| Ror2     | 1.55 | 0.46 | 3.3  | 1.4  | 2.88 |
| Rora     | 0.3  | 0.52 | 0.53 | 3.66 | 0    |
| Rorb     | 0    | 1.65 | 0.98 | 0    | 0    |
| Rorc     | 1.57 | 0    | 1.54 | 0.2  | 0    |
| Ros1     | 0.26 | 1.86 | 3.47 | 4.16 | 0    |
| Rp1      | NA   | NA   | 0.01 | 0.93 | 2.33 |
| Rp111    | NA   | NA   | 0.3  | 0.28 | NA   |
| Rp9      | NA   | NA   | 2.2  | 1.12 | 0    |
| Rpa1     | 0.3  | 0    | 1.38 | 1.51 | 0    |
| Rpa2     | 0.85 | 0.51 | 3.7  | 1.59 | 1.58 |
| Rpa3     | 0.17 | 2.31 | 1.55 | 1.44 | 7.75 |
| Rpain    | NA   | 0.35 | 1.87 | 5.46 | 0    |
| Rpap1    | 0    | 0    | 2.04 | 2.57 | 0    |
| Rpap2    | NA   | 0.45 | 1.27 | 0.22 | 1.37 |
| Rpap3    | NA   | 1.58 | 4.77 | 0.62 | 0    |
| Rpe      | 1.84 | 0.1  | 0.03 | 0.64 | 5.17 |
| Rpe65    | 0.59 | 2.27 | 5.15 | 0    | 0    |
| Rpf1     | NA   | 1.81 | 1.09 | 1.14 | NA   |
| Rpf2     | NA   | NA   | 2.41 | 0.85 | NA   |
| Rpgr     | 0.21 | 1.1  | 1.01 | 0.02 | 0    |
| Rpgrip1  | 0    | 0    | 0    | NA   | 0.77 |
| Rpgrip11 | NA   | NA   | NA   | 0    | NA   |
| Rph3a    | 3.37 | 0.61 | 0    | 1.76 | 1.68 |
| Rph3al   | 2.27 | 2.32 | 1.42 | 1.14 | 1.23 |
| Rpia     | 0.29 | 0.49 | 2.74 | 0.98 | 0    |
| Rpl10    | 1.03 | 0.22 | 0.13 | 1.97 | 0    |
| Rpl10a   | 0.36 | 0    | 2.28 | 1.89 | NA   |
| Rpl10l   | NA   | NA   | NA   | 8.28 | NA   |
| Rpl11    | 0.29 | 1.04 | 2    | 0    | 0    |
| Rpl12    | 0.63 | 0    | 1.31 | 0    | 3.3  |
| Rpl13    | 0    | 0    | 2.92 | 0.75 | 0    |
| Rpl13a   | 0.44 | 0    | 1.58 | NA   | 3.04 |
| Rpl14    | 0    | 2.56 | 1.93 | 0.04 | 0    |
| Rpl15    | 0.27 | 0.61 | 0.98 | 0    | 0    |
| Rpl17    | 0    | 0.4  | 0.97 | 0.47 | 0    |
| Rpl18    | NA   | 0    | 1.15 | 0    | 0    |
| Rpl18a   | NA   | NA   | NA   | 0    | NA   |

|         |      |      |      |      |       |
|---------|------|------|------|------|-------|
| Rpl19   | 0.6  | 0    | 4.59 | 0    | 0     |
| Rpl21   | NA   | 0.87 | 1.98 | NA   | 2.12  |
| Rpl22   | 0.51 | 0    | 2.15 | 0    | 0     |
| Rpl2211 | NA   | NA   | 1.12 | NA   | 0     |
| Rpl23   | 0.89 | 0    | 0.85 | NA   | 1.98  |
| Rpl23a  | 0.17 | 1.27 | 1.43 | 0    | 0     |
| Rpl24   | NA   | 1.09 | 2.65 | NA   | NA    |
| Rpl26   | 0.27 | 1.74 | 2.87 | 0    | 0     |
| Rpl27   | 0    | 2.05 | 0.97 | 0    | NA    |
| Rpl27a  | 0.54 | 2.28 | 0.92 | 0.94 | 0     |
| Rpl28   | 0.69 | 0    | 1.6  | 0    | NA    |
| Rpl29   | 0.34 | NA   | NA   | 0.55 | NA    |
| Rpl3    | 0.21 | 0.96 | 1.06 | 1.66 | 0     |
| Rpl30   | 1.16 | NA   | NA   | 0    | NA    |
| Rpl31   | 0.95 | 0.93 | 0.87 | 0    | 5.24  |
| Rpl32   | 0    | 0    | 2.3  | NA   | 7.39  |
| Rpl34   | NA   | 1.12 | 3.51 | 0    | 0     |
| Rpl35   | NA   | 0.77 | 0.97 | 0    | 3.78  |
| Rpl35a  | 1.31 | NA   | NA   | NA   | NA    |
| Rpl36   | 0.41 | 0    | 2.46 | 0.11 | NA    |
| Rpl36a  | 0.86 | 0.92 | 2.26 | NA   | 8.96  |
| Rpl36al | 0.22 | 0.85 | 1.39 | NA   | 0     |
| Rpl37   | 0.41 | 0    | 1.33 | NA   | 1.51  |
| Rpl37a  | 0.02 | 0    | 1.22 | NA   | 0     |
| Rpl38   | 0.28 | 0.72 | 1.93 | 0    | NA    |
| Rpl39   | 0    | NA   | NA   | NA   | 0     |
| Rpl391  | NA   | 0.59 | 2.39 | 3.44 | 0.14  |
| Rpl31   | 1.21 | 0.69 | 3.94 | 0.59 | 18.68 |
| Rpl4    | 0.05 | 0.05 | 0.28 | 1.08 | 0     |
| Rpl41   | 0.57 | 1.6  | 0.63 | 0    | 0     |
| Rpl5    | 0.04 | 0    | 2.24 | 0    | NA    |
| Rpl6    | 0    | 1.05 | 1.5  | 1.14 | 0     |
| Rpl7    | 0.82 | 1.45 | 1.01 | 0    | 0     |
| Rpl7a   | 0.09 | 1.95 | 1.01 | 0    | 3.33  |
| Rpl711  | NA   | NA   | 2.82 | 0.87 | 0     |
| Rpl8    | 0.41 | 0    | 0.99 | 0.76 | 0     |
| Rpl9    | 0    | 0.95 | 3.26 | 0.07 | 0     |
| Rplp0   | 0    | 0.81 | 1.49 | 0.17 | 0     |
| Rplp1   | NA   | 1.85 | 2.46 | 0.45 | 5.45  |
| Rplp2   | 0.63 | 0.28 | 0.91 | 1.38 | 0     |
| Rpn1    | 0.23 | 2.05 | 1.46 | 0    | 1.84  |

|          |      |      |      |      |      |
|----------|------|------|------|------|------|
| Rpn2     | NA   | 1.55 | 2.52 | 3.2  | 0    |
| Rpp14    | 0.85 | 1.76 | 0.53 | 1.6  | 0    |
| Rpp21    | 0.36 | NA   | NA   | NA   | NA   |
| Rpp25    | 0    | 1.18 | 1.39 | 1.82 | 1.44 |
| Rpp25l   | NA   | NA   | 0.59 | 3.82 | NA   |
| Rpp30    | 0.34 | 0.9  | 1.53 | 0.72 | 0    |
| Rpp38    | 0    | NA   | NA   | 1.01 | NA   |
| Rpp40    | 2.3  | 0.89 | 0.09 | 2.2  | 0.76 |
| Rpph1    | 0.84 | NA   | NA   | NA   | NA   |
| Rprd1a   | NA   | 1.34 | 1.34 | 0.69 | 0    |
| Rprd1b   | NA   | NA   | 0.58 | 1.09 | 0    |
| Rprd2    | NA   | 0    | 0.44 | 0    | 0.04 |
| Rprm     | NA   | 2.08 | 0.41 | 0.31 | 2.71 |
| Rprml    | NA   | NA   | 0.22 | 2.25 | NA   |
| Rps10    | 0.51 | 1.6  | 2.01 | 0    | 0    |
| Rps11    | 0.54 | 0.75 | 1.06 | 0    | 0    |
| Rps12    | 0.63 | 1.46 | 1.74 | NA   | 0    |
| Rps13    | 0    | 1.68 | 2.62 | 0.04 | NA   |
| Rps14    | 0.52 | 0    | 0.66 | 0.18 | 0    |
| Rps15    | 0    | 0    | 1.11 | 0.19 | 0    |
| Rps15a   | 0    | 1.09 | 0.56 | 0    | 0    |
| Rps16    | 0.71 | 0    | 0.22 | NA   | 0    |
| Rps17    | 0.43 | 1.06 | 1.83 | NA   | 0    |
| Rps18    | 1.62 | 0    | 1.71 | 0    | 3.45 |
| Rps19    | 0.67 | 0    | 0.97 | 0.14 | 0    |
| Rps19bp1 | NA   | NA   | 2.03 | 1.37 | 0    |
| Rps2     | NA   | 1.68 | 1.32 | 0    | 0    |
| Rps20    | 0.9  | 1.75 | 3.36 | 0    | 0    |
| Rps21    | 0.43 | 1.05 | 0.48 | 0.63 | 0    |
| Rps23    | 0.17 | 0    | 1.04 | 0.47 | NA   |
| Rps24    | 0.06 | 1.03 | 2.53 | 0.16 | 0    |
| Rps25    | 0.68 | 2.86 | 0.83 | 0    | 1.57 |
| Rps26    | 0.45 | 1.5  | 3.42 | 0    | 0    |
| Rps27    | 0.62 | 1.17 | 1.1  | NA   | 0.8  |
| Rps27a   | 0.42 | 4.31 | 2.18 | 0    | NA   |
| Rps27l   | 0.14 | 0    | 1.09 | 0    | 0.16 |
| Rps28    | 0.56 | 0.92 | 3.93 | 0.51 | NA   |
| Rps29    | 1.02 | 2.38 | 1.65 | 1.97 | NA   |
| Rps3     | 0.1  | 1.25 | 0.47 | 0    | 0    |
| Rps4x    | 0.52 | 0    | 0.72 | 0    | 7.05 |
| Rps4y2   | NA   | NA   | NA   | 0.62 | NA   |

|         |      |      |      |       |      |
|---------|------|------|------|-------|------|
| Rps5    | 0.29 | 0    | 0.94 | 0     | 0    |
| Rps6    | 0.2  | 0.7  | 1.01 | 0     | 0    |
| Rps6ka1 | 0.04 | 0.76 | 2.96 | 0     | 0    |
| Rps6ka2 | 0    | 1.84 | 0.67 | 0.71  | 0.47 |
| Rps6ka3 | 0.37 | 0.5  | 2.45 | 0.37  | 1.33 |
| Rps6ka4 | 0    | 2.41 | 0    | 1.22  | 1.37 |
| Rps6ka5 | 0.13 | 0    | 2.05 | 0.28  | 0    |
| Rps6ka6 | 1.72 | 1.36 | 1.02 | 1.13  | 0    |
| Rps6kb1 | 0.39 | 0.6  | 0    | 0.78  | 1.36 |
| Rps6kb2 | 0.16 | 2.79 | 1.01 | 0.34  | 1.78 |
| Rps6kc1 | 1.77 | 3.15 | 3.25 | 0     | 0    |
| Rps6kl1 | 1.21 | NA   | 0.58 | 0.99  | 5.94 |
| Rps7    | 0.27 | 2.23 | 1.11 | 0     | 0    |
| Rps8    | 0.45 | 0    | 1.81 | 0.07  | 0    |
| Rps9    | NA   | 0    | 0.77 | 0.56  | 0    |
| Rpsa    | NA   | 0    | 0.11 | NA    | 0    |
| Rptn    | 0.61 | NA   | 0.43 | 0.43  | NA   |
| Rptor   | NA   | NA   | 0.78 | 1.09  | 0    |
| Rpusd1  | NA   | NA   | 1.06 | 0.37  | 0    |
| Rpusd2  | NA   | 0    | 0    | 4.64  | 0.64 |
| Rpusd3  | NA   | NA   | 0.41 | 0     | 0    |
| Rpusd4  | NA   | NA   | 2.44 | 1.36  | 0    |
| Rqcd1   | 1.22 | 1.02 | 2.39 | 0.84  | 0    |
| Rrad    | 0.32 | 1.27 | 2.78 | 2.01  | 0    |
| Rraga   | 4.15 | 4.22 | 1.68 | 1.96  | 4.71 |
| Rragb   | NA   | NA   | NA   | 1.92  | NA   |
| Rragc   | 0    | 0.34 | 0.9  | 0.6   | 0    |
| Rragd   | 0.45 | 0    | 0.19 | 0.63  | 0    |
| Rras    | 0.32 | 0    | 2.23 | 0.7   | 0    |
| Rras2   | 0.58 | 0    | 3.29 | 0.38  | 0    |
| Rrbp1   | 0.15 | 0.45 | 0.58 | 0     | 0    |
| Rreb1   | NA   | 0.53 | 0.52 | 12.55 | 0.16 |
| Rrh     | 1.94 | 0.93 | 0.3  | 0.15  | 0.06 |
| Rrm1    | 0.29 | 0.67 | 1.65 | 0.18  | 0    |
| Rrm2    | 1.49 | 0.89 | 2.18 | 0.51  | 0.18 |
| Rrm2b   | 1.99 | NA   | 1.61 | 0.91  | 0    |
| Rrn3    | 0.38 | 2.63 | 1.56 | 0.78  | 0    |
| Rrnad1  | NA   | 4.15 | 2.7  | 0.54  | NA   |
| Rrp1    | NA   | 2.83 | 0.33 | 2.7   | 1.05 |
| Rrp12   | NA   | 1.32 | 0.98 | 2.68  | 1.4  |
| Rrp15   | NA   | 2.02 | 0.43 | 1.46  | 4.56 |

|         |      |      |      |      |       |
|---------|------|------|------|------|-------|
| Rrp1b   | NA   | 1.56 | 1.08 | 0.8  | 1.29  |
| Rrp36   | NA   | NA   | 2.26 | 1.05 | NA    |
| Rrp7a   | NA   | 1.15 | 1.01 | NA   | 1.72  |
| Rrp8    | NA   | 0.26 | 4.77 | 1.1  | 0.05  |
| Rrp9    | NA   | 1.65 | 0.41 | 1.66 | 0.53  |
| Rrs1    | 0.85 | 2.85 | 1.41 | 2.7  | 0     |
| Rs1     | NA   | 0.2  | 0.42 | 0.98 | 2.65  |
| Rsad1   | NA   | 0    | 0.64 | 0.31 | 3.06  |
| Rsad2   | NA   | 1.51 | 1.31 | 0.11 | 2.01  |
| Rsbn1   | 0.4  | 2.33 | 1.11 | 0    | NA    |
| Rsbn11  | 0.92 | NA   | NA   | 0.35 | NA    |
| Rsf1    | NA   | 0.89 | 1.69 | 1.04 | 0.96  |
| Rsg1    | NA   | 1.44 | 0.23 | 0.97 | NA    |
| Rsh11   | 7.71 | NA   | NA   | NA   | NA    |
| Rsh12   | 0.39 | NA   | NA   | NA   | NA    |
| Rsh13   | 1.64 | NA   | NA   | NA   | NA    |
| Rsl1d1  | NA   | 1.04 | 1.09 | 1.95 | 0     |
| Rsl24d1 | NA   | 0    | 1.94 | 0.42 | 0     |
| Rsph1   | NA   | NA   | 1.53 | 2.09 | 0.88  |
| Rsph4a  | NA   | NA   | 0.26 | 2.14 | 0     |
| Rsph6a  | NA   | 1.87 | 1.64 | 0.94 | NA    |
| Rsph9   | NA   | NA   | 1.25 | 0.94 | 3.87  |
| Rspo1   | NA   | NA   | 0.36 | 1.45 | 13.14 |
| Rspo2   | NA   | NA   | 1.04 | 1.12 | NA    |
| Rspo3   | NA   | NA   | 0.89 | 0.42 | 0     |
| Rspo4   | NA   | NA   | 1.87 | 1.16 | 0.61  |
| Rspry1  | NA   | NA   | 0.95 | 0.85 | 3.16  |
| Rsrc1   | NA   | 1.68 | 0.78 | 0.95 | 0.94  |
| Rsrc2   | NA   | 0.41 | 1.04 | 0.57 | 1.19  |
| Rsu1    | 0    | 0.53 | 0.05 | 1.34 | 0.61  |
| Rtbdn   | NA   | NA   | 1.97 | 0.76 | 0.29  |
| Rtca    | NA   | 0    | 0    | 1.24 | NA    |
| Rtcd1   | 0.43 | NA   | NA   | NA   | 3.53  |
| Rtdr1   | 0.24 | 1.27 | 1.21 | 3.32 | 3.53  |
| Rtel1   | NA   | 1.22 | 1.19 | 1.77 | 0     |
| Rtf1    | NA   | 0.58 | 1.34 | 0.53 | 0.86  |
| Rtfdc1  | NA   | 0.05 | 0.81 | 1.45 | NA    |
| Rtkn    | 0.91 | NA   | 1.14 | 0    | 0     |
| Rtkn2   | NA   | NA   | 0.41 | 0.65 | 3.62  |
| Rtl1    | 0    | NA   | NA   | NA   | NA    |
| Rtn1    | 0    | 0    | 2.15 | 1.45 | 7.34  |

|         |      |      |      |      |      |
|---------|------|------|------|------|------|
| Rtn2    | 2.43 | 1.92 | 1.57 | 2.67 | 7.16 |
| Rtn3    | 0.56 | 3.14 | 1.07 | 4.18 | 0    |
| Rtn4    | 0.23 | 0.72 | 0.72 | 0.22 | 0    |
| Rtn4ip1 | 0    | NA   | 0    | 1.04 | 0    |
| Rtn4r   | 1.37 | NA   | 0    | 0.78 | 0    |
| Rtn4rl1 | 0    | NA   | 0.83 | 1.2  | 2.36 |
| Rtn4rl2 | 2.83 | NA   | 0.94 | 1.3  | 3.81 |
| Rtp1    | NA   | NA   | NA   | 0.74 | NA   |
| Rtp2    | NA   | NA   | NA   | 0.82 | NA   |
| Rtp3    | NA   | NA   | 1.28 | 1.51 | NA   |
| Rtp4    | NA   | 0.38 | 1.51 | 1.93 | 0.47 |
| Rttt    | 0.47 | NA   | 1.14 | 0    | 0    |
| Rufy1   | 1.5  | 0.14 | 1.53 | 0.42 | 0.11 |
| Rufy2   | 0.66 | 1.1  | 0    | 0.56 | 0.91 |
| Rufy3   | NA   | 0.19 | 1    | 1.42 | 0    |
| Rufy4   | NA   | NA   | NA   | 3.14 | NA   |
| Rundc1  | 0    | NA   | 1.54 | 0.64 | 0    |
| Rundc3a | NA   | 0.56 | 0.76 | 1.09 | 2.2  |
| Rundc3b | NA   | 1.7  | 1.4  | 0.85 | 0.75 |
| Runx1   | 0.09 | 0.91 | 0    | 3.35 | 0    |
| Runx1t1 | NA   | 0.85 | 0.67 | 0    | 0.76 |
| Runx2   | 2.75 | 0.24 | 0.49 | 2.12 | 0    |
| Runx3   | 0.86 | 0    | 1.44 | 0.62 | 0    |
| Rusc1   | 0.41 | 0.17 | 0.86 | 0.12 | 0.74 |
| Rusc2   | 0.22 | 1.29 | 1.37 | 0.94 | 1.29 |
| Rutbc1  | 6.23 | NA   | NA   | NA   | NA   |
| Rutbc2  | 0.5  | NA   | NA   | NA   | NA   |
| Rutbc3  | 0    | NA   | NA   | NA   | NA   |
| Ruvbl1  | 0    | 2.8  | 0.39 | 0.66 | 9.07 |
| Ruvbl2  | 0.4  | 2.04 | 0.64 | 0.9  | 3.03 |
| Rwdd1   | 1.03 | 0    | 0.63 | 0    | 2.93 |
| Rwdd2   | 0.87 | NA   | NA   | NA   | NA   |
| Rwdd2a  | NA   | 1.92 | 2.02 | 0.35 | 2.97 |
| Rwdd2b  | NA   | 3.1  | 0.44 | 1.22 | 2.22 |
| Rwdd3   | 7.91 | 0.87 | 0.97 | 0.45 | 2.83 |
| Rwdd4a  | NA   | NA   | NA   | NA   | 0    |
| Rxftp1  | NA   | NA   | 0.66 | 3.96 | 0    |
| Rxftp2  | NA   | NA   | 1.71 | 0.76 | NA   |
| Rxftp3  | NA   | NA   | NA   | 2.32 | NA   |
| Rxftp4  | NA   | NA   | NA   | 1.36 | NA   |
| Rxra    | 0.99 | 0.84 | 1.12 | 2.2  | 0.59 |



|         |      |      |      |      |      |
|---------|------|------|------|------|------|
| Rxrb    | 0.02 | 0.59 | 0    | 1.27 | 1.74 |
| Rxrg    | 0.18 | 3.03 | 0    | 1.48 | 2.6  |
| Rybp    | 1.29 | 0.79 | 0.9  | 0.22 | 0.44 |
| Ryk     | 0.25 | 0.08 | 0.11 | 1.09 | 1.81 |
| Ryr1    | 0.68 | 0.67 | 0.5  | 0.52 | 2.9  |
| Ryr2    | 0.31 | 0    | 0.44 | 1.15 | 0    |
| Ryr3    | 0.48 | 0.21 | 0.95 | 0    | 1.6  |
| S100a1  | 2.93 | 2.83 | 2.35 | 1.49 | 0    |
| S100a10 | 0.31 | 0.49 | 0    | 0    | 0    |
| S100a11 | 0.36 | 0.6  | 1.99 | 0.02 | 0    |
| S100a13 | 0.03 | 0.28 | 4.05 | 0.47 | 1.87 |
| S100a14 | 1.05 | 1.41 | 0.21 | 0.12 | 1.34 |
| S100a16 | 0.53 | NA   | 1.47 | 1.09 | 1.01 |
| S100a2  | NA   | NA   | NA   | 0.86 | NA   |
| S100a3  | 0.65 | 1.7  | 0.14 | 3.18 | 6.41 |
| S100a4  | 0.26 | 2.37 | 1.4  | 2.28 | 5.05 |
| S100a5  | 1.8  | 3.18 | 0.4  | 0    | 0    |
| S100a6  | 0.49 | 0.11 | 3.37 | 0.44 | 0    |
| S100a7a | NA   | NA   | NA   | 1.25 | NA   |
| S100a8  | 0.52 | 0.58 | 5.83 | 0.7  | 1.24 |
| S100a9  | 0.44 | 0.1  | 5.02 | 0    | 0    |
| S100b   | 0    | 1.66 | 1.2  | 1    | 0.81 |
| S100g   | 2.38 | 2.6  | 0.64 | 1.25 | 2.47 |
| S100pbp | NA   | 0.1  | 1.4  | 0.7  | 0    |
| S100z   | NA   | NA   | NA   | 0.92 | NA   |
| S1pr1   | NA   | 0.07 | 4.72 | 1.44 | 2.52 |
| S1pr2   | NA   | 0.24 | 1.37 | 1.94 | 0.76 |
| S1pr3   | NA   | NA   | 0.51 | NA   | 0.88 |
| S1pr4   | NA   | 3.78 | 1.76 | 1.15 | 1.49 |
| S1pr5   | NA   | 0.05 | 0.75 | 1.4  | 0    |
| Saa1    | 0    | NA   | NA   | NA   | NA   |
| Saa2    | 0.4  | 0.74 | 1.19 | 0.6  | NA   |
| Saa4    | 0.78 | 0.74 | 0.98 | 1.51 | 3.5  |
| Saal1   | NA   | NA   | 0.3  | 0.72 | 3.2  |
| Sac3d1  | NA   | 1.26 | 0.09 | 3.74 | 0    |
| Sacm11  | 2.15 | 0.25 | 1.2  | 0.51 | 0    |
| Sacs    | NA   | 0.21 | 1.27 | 0    | 0    |
| Sae1    | NA   | 0    | 1.01 | 0.87 | 0.68 |
| Safb    | NA   | 0.2  | 0.51 | 1.64 | 0.31 |
| Safb2   | NA   | 0.02 | 1.77 | 3.5  | 2.61 |
| Sag     | 0    | 2.65 | 0.68 | 0.93 | 0    |

|         |      |      |      |      |      |
|---------|------|------|------|------|------|
| Sall1   | 0.97 | 0.99 | 3.03 | 1.23 | 0    |
| Sall2   | 0    | 3.41 | 2.34 | 2.78 | 0    |
| Sall3   | 0.33 | NA   | 0    | 1.87 | 0    |
| Sall4   | 0.69 | NA   | 0.64 | 0.21 | 2.54 |
| Samd1   | NA   | NA   | 0    | 0.16 | NA   |
| Samd10  | 2.03 | NA   | 1.82 | 0.91 | 0.23 |
| Samd11  | 1.13 | NA   | 0.71 | NA   | NA   |
| Samd12  | NA   | NA   | 0.02 | 1.5  | 3.25 |
| Samd14  | NA   | 3.61 | 1.07 | 0.97 | 1.94 |
| Samd3   | NA   | NA   | NA   | 0    | NA   |
| Samd4b  | NA   | 2.25 | 0.7  | 1.4  | 0    |
| Samd5   | NA   | NA   | 0.49 | 1.03 | 1.75 |
| Samd7   | 1.15 | NA   | NA   | 2.88 | NA   |
| Samd8   | 0.61 | NA   | 1.23 | 6.92 | 2.68 |
| Samd9l  | NA   | NA   | 1.71 | 0    | 0.2  |
| Samhd1  | 0.39 | 0.8  | 0.37 | NA   | 0    |
| Samm50  | NA   | 0.15 | 1.03 | 0.21 | 0.05 |
| Samsn1  | 0.06 | 0    | 0.72 | 1.96 | 0    |
| Sap130  | NA   | 0    | 1.01 | 0.78 | 0    |
| Sap18   | 0    | 1.78 | 1.56 | 0    | 0    |
| Sap25   | NA   | NA   | NA   | 1.5  | NA   |
| Sap30   | 0.56 | 0.09 | 0.84 | 0.96 | 1.77 |
| Sap30bp | NA   | 0.78 | 0.91 | 0.64 | 0.18 |
| Sap30l  | NA   | 2.81 | 1.09 | 1.17 | NA   |
| Sapcd1  | NA   | 0    | 1.28 | NA   | NA   |
| Sapcd2  | NA   | NA   | 1.73 | 1.43 | NA   |
| Saps1   | NA   | NA   | NA   | NA   | 5.7  |
| Saps2   | NA   | NA   | NA   | NA   | 1.52 |
| Saps3   | NA   | NA   | NA   | NA   | 0.18 |
| Sar1a   | NA   | 0.63 | 1.35 | 0.38 | 1.1  |
| Sar1b   | NA   | 1.73 | 1.51 | 0.62 | 0.83 |
| Sardh   | 1.4  | 2.05 | 1.54 | 1.14 | 1.63 |
| Sarnp   | NA   | NA   | 1.88 | 1.08 | NA   |
| Sars    | NA   | 0.08 | 1.02 | 0.5  | 0    |
| Sars2   | NA   | 0    | 0.83 | 1.01 | 3.41 |
| Sart1   | 1.45 | 0.29 | 0.1  | NA   | 1.03 |
| Sart3   | 0.99 | 0    | 1.06 | 0.93 | 4.62 |
| Sash1   | 1.73 | 1.07 | 2.19 | 0.81 | 0.78 |
| Sash3   | NA   | 1.06 | 0.65 | 0.63 | 1.08 |
| Sass6   | NA   | NA   | 1.14 | NA   | 0    |
| Sat1    | 0    | 0    | 1.47 | 0.94 | 0    |

|          |      |      |      |      |      |
|----------|------|------|------|------|------|
| Sat2     | 0    | NA   | 0    | 6.38 | 0    |
| Satb1    | 0.37 | 0    | 1.44 | 2.17 | 2.62 |
| Satb2    | 1.03 | 1.86 | 0.55 | 0.83 | 1.78 |
| Satl1    | NA   | NA   | NA   | 3.38 | NA   |
| Sav1     | 0    | 1.1  | 0.22 | 0.59 | NA   |
| Saysd1   | NA   | 0.14 | 1.32 | 1.45 | NA   |
| Sbds     | 1.38 | NA   | NA   | 1.12 | NA   |
| Sbf1     | 0.53 | 0    | 0.42 | 1.06 | 0.78 |
| Sbf2     | NA   | NA   | 1.44 | 0.64 | 1.13 |
| Sbk1     | NA   | NA   | 1.7  | 0.95 | 0    |
| Sbk2     | NA   | NA   | NA   | 0.44 | NA   |
| Sbno1    | 2.07 | 0    | 0.52 | 0    | 0.41 |
| Sbno2    | NA   | 0.53 | 1.8  | 0.44 | 0    |
| Sbsn     | 0.75 | NA   | 0.97 | 3.76 | 0    |
| Sbspon   | NA   | 1.07 | 0.94 | 1.2  | NA   |
| Sc4mol   | 0.56 | NA   | NA   | NA   | 1.22 |
| Sc5d     | NA   | 1.36 | 0.57 | 0.71 | NA   |
| Scaf1    | NA   | NA   | 0    | 0.77 | 0.13 |
| Scaf11   | NA   | 0.85 | 0.36 | 0.01 | NA   |
| Scaf4    | NA   | 1    | 0.12 | 0.9  | NA   |
| Scaf8    | NA   | 0    | 3    | 0    | NA   |
| Scai     | NA   | 0.65 | 2.58 | 0    | 0    |
| Scamp1   | 0.81 | 0.99 | 1.45 | 0    | 2.04 |
| Scamp2   | 0    | 1.64 | 0.82 | 0.79 | 3.01 |
| Scamp3   | 0.57 | 0    | 1.01 | 0.61 | 0    |
| Scamp4   | 0.05 | NA   | NA   | NA   | NA   |
| Scamp5   | 0    | 0.27 | 0.81 | 1.71 | 0    |
| Scand1   | 0.58 | 0    | 0.75 | 0.4  | 2.23 |
| Scand3   | NA   | NA   | NA   | NA   | 0.36 |
| Scap     | 0.58 | 0    | 1.5  | 1.22 | 0    |
| Scaper   | NA   | 1.08 | 1.85 | 0    | 0    |
| Scara3   | 1.14 | 0.87 | 0.23 | 2.17 | 2.37 |
| Scara5   | NA   | NA   | 0.72 | 1.61 | 1.58 |
| Scarb1   | 0    | 1.18 | 1.92 | 2.43 | 4.28 |
| Scarb2   | 0.5  | 0.04 | 2.4  | 7.19 | 0.57 |
| Scarf1   | NA   | 0.93 | 1.67 | 0.87 | 0    |
| Scarf2   | 1.02 | NA   | 0.57 | 0.46 | 0.73 |
| Scarna13 | NA   | NA   | NA   | 0.39 | NA   |
| Scarna17 | NA   | NA   | NA   | 0    | NA   |
| Scarna8  | NA   | NA   | NA   | 0    | NA   |
| Sccpdh   | NA   | 0    | 1.35 | 0.16 | 7.19 |

|         |      |      |       |      |      |
|---------|------|------|-------|------|------|
| Scel    | 1.79 | 0.27 | 1.76  | 0.8  | 1.55 |
| Scfd1   | 0.68 | 0.08 | 1.52  | 0.97 | 1    |
| Scfd2   | 0    | NA   | 0.95  | 0.06 | 2.07 |
| Scg2    | 0.22 | 0.77 | 0.44  | 2.78 | 0    |
| Scg3    | 0.02 | 2.9  | 12.18 | 7.5  | 0    |
| Scg5    | NA   | 0.87 | 5.08  | 0.18 | 0    |
| Scgb1a1 | 0.99 | 1.19 | 0     | 1.25 | 0    |
| Scgb2b2 | NA   | NA   | NA    | 0    | NA   |
| Scgb3a1 | 0.16 | NA   | 0.61  | 1.53 | 3.92 |
| Scgb3a2 | 0.8  | NA   | 0.71  | 1.85 | 0.43 |
| Scgn    | 0.34 | 0.72 | 0.96  | 0    | 6.15 |
| Schip1  | 0.67 | NA   | NA    | NA   | 0    |
| Scimp   | NA   | NA   | NA    | 0.7  | NA   |
| Scin    | 0    | 2.41 | 0.23  | 0.6  | 1.27 |
| Sclt1   | NA   | NA   | 0.18  | 0.49 | 3.33 |
| Scly    | 0    | 0.53 | 1.25  | 1.25 | 0    |
| Scmh1   | 0.08 | 0    | 1.29  | 3.27 | 0    |
| Scml2   | 0.97 | 2.07 | 1.02  | 0    | NA   |
| Scml4   | 0.88 | NA   | 0     | 1.51 | NA   |
| Scn10a  | 0    | 1.86 | 3.24  | 1.31 | 4.54 |
| Scn11a  | 3.31 | 1.48 | 0.51  | 1.5  | 0    |
| Scn1a   | 0.61 | 1.79 | 0.1   | 1.34 | 0.33 |
| Scn1b   | 1.25 | 2.79 | 1.23  | 2.62 | 0    |
| Scn2a   | 0.7  | NA   | NA    | NA   | NA   |
| Scn2b   | NA   | 0.58 | 0.55  | 2.11 | 0    |
| Scn3a   | 0.05 | 0.86 | 1.02  | 1.01 | 0    |
| Scn3b   | 0.42 | 0.83 | 1.99  | 2.74 | 1.24 |
| Scn4a   | 0    | 3.08 | 1.54  | 0.66 | 0    |
| Scn4b   | NA   | NA   | 0.71  | 2.14 | 2.95 |
| Scn5a   | 2.3  | 1.9  | 1.1   | 0.95 | 0    |
| Scn7a   | 0.93 | 0.29 | 0.8   | 0.1  | 1.05 |
| Scn8a   | 0.85 | 1.37 | 0     | 0.14 | 0    |
| Scn9a   | 0.55 | 0.45 | 1.35  | 0.38 | 0.91 |
| Scnm1   | 0    | 2.37 | 3.9   | 2.55 | 2.31 |
| Scnn1a  | 2.63 | 0.06 | 0     | 0.61 | 5.5  |
| Scnn1b  | 0.9  | 0.81 | 2.33  | 0.68 | 0.63 |
| Scnn1g  | 2.07 | 2.05 | 0.73  | 4.15 | 3.68 |
| Sco1    | 0    | NA   | 3.22  | 0.38 | 0    |
| Sco2    | NA   | 1.14 | 1.97  | 0.68 | 0    |
| Scoc    | 0    | NA   | 3.34  | 1.38 | 0    |
| Scotin  | 0.15 | NA   | NA    | NA   | NA   |

|          |      |      |      |      |      |
|----------|------|------|------|------|------|
| Scp2     | 0.27 | 0    | 0.85 | 2.27 | 0    |
| Scp2d1   | NA   | NA   | 0.9  | 1.06 | NA   |
| Scpep1   | 0    | 0    | 0.15 | 1.8  | 0    |
| Scrg1    | 0.39 | 1.12 | 2.1  | 0.33 | 0    |
| Scrib    | 0.33 | 0.47 | 0    | 1.39 | 0    |
| Scrn1    | 0.38 | 0.84 | 0.67 | 0    | 2.71 |
| Scrn2    | 1.32 | NA   | 1.34 | 1.51 | 7.26 |
| Scrn3    | 0.69 | 2.94 | 1.94 | 1.68 | 0.41 |
| Scrt1    | 1.14 | 1.33 | 1.97 | 0.4  | 2.78 |
| Scrt2    | NA   | NA   | NA   | 0.73 | NA   |
| Sct      | 3.55 | 0    | 0.75 | 1.08 | 4.3  |
| Sctr     | 0    | 1.35 | 1.53 | 0.63 | 0    |
| Scube1   | 0.84 | NA   | 1.74 | 0.16 | 2.85 |
| Scube2   | 1.22 | 1.19 | 0    | 1.38 | 0    |
| Scube3   | NA   | 1.9  | 2.44 | 0.72 | 0    |
| Scye1    | 0.21 | NA   | NA   | NA   | NA   |
| Scyl1    | 0.75 | NA   | 1.52 | 3.19 | 0    |
| Scyl2    | NA   | 1.45 | 0.56 | 0.01 | 0    |
| Scyl3    | NA   | 1.2  | 1.49 | 0.46 | 0    |
| Sdad1    | 1.64 | 2.31 | 0.14 | 1.07 | 0    |
| Sdc1     | 1.02 | 1.63 | 0.75 | 1    | 2.57 |
| Sdc2     | 0.37 | 0.89 | 1.12 | 0.59 | 0.9  |
| Sdc3     | 0.3  | 0.05 | 1.37 | 0    | 2.46 |
| Sdc4     | 0.25 | 1.94 | 0    | 4.58 | 6.68 |
| Sdcbp    | 0.69 | 1.54 | 1.21 | 0.83 | 0    |
| Sdcbp2   | 0.31 | NA   | 0.02 | 1.9  | 0    |
| Sdccag1  | 0    | NA   | NA   | NA   | 0    |
| Sdccag10 | 0    | NA   | NA   | NA   | NA   |
| Sdccag3  | NA   | 1.14 | 0.12 | 1.13 | 0.59 |
| Sdccag8  | 0.5  | NA   | 2.38 | 0.48 | 0    |
| Sde2     | NA   | NA   | 0.81 | 0    | NA   |
| Sdf2     | 0    | 4.29 | 1.06 | 0.86 | 0    |
| Sdf2l1   | 0.05 | 2.06 | 0.9  | 1.01 | 2.68 |
| Sdf4     | 0.5  | 1.02 | 3.19 | 0.67 | 0    |
| Sdha     | 0.18 | 0    | 1.05 | 0    | 1.61 |
| Sdhaf1   | NA   | 1.85 | 3.72 | NA   | 1.73 |
| Sdhaf2   | NA   | NA   | 5.82 | 0.47 | 2.65 |
| Sdhb     | 0.41 | 0    | 2.12 | 0.76 | 0.16 |
| Sdhc     | 0    | 1.04 | 0.06 | 0.21 | 1.24 |
| Sdhd     | 0.53 | 0.79 | 0.07 | 0.55 | 0    |
| Sdk1     | 1.14 | NA   | 1.02 | 2.12 | 1.93 |

|           |      |      |      |      |      |
|-----------|------|------|------|------|------|
| Sdk2      | 1.58 | 1.16 | 1.19 | 2.16 | 0    |
| Sdpr      | 0.28 | 0    | 1.06 | 0    | 0    |
| Sdr16c5   | NA   | NA   | 0.96 | 0.89 | 2.44 |
| Sdr39u1   | NA   | 0    | 0.25 | 1.38 | 2.1  |
| Sdr42e1   | NA   | NA   | 3.26 | 0.21 | 1.04 |
| Sdr9c7    | NA   | NA   | 1.94 | 1.48 | NA   |
| Sds       | 1.25 | 1.54 | 1.59 | 2.05 | 0.57 |
| Sdsl      | 0    | NA   | 1.6  | 0    | 0.12 |
| Sebox     | NA   | NA   | 0    | 1.05 | NA   |
| Sec1      | NA   | NA   | NA   | NA   | 2.38 |
| Sec11a    | NA   | 1.85 | 2.76 | 0    | 0    |
| Sec11c    | NA   | NA   | 1.47 | 1.2  | 0    |
| Sec13     | NA   | 1.65 | 1.27 | 1.45 | 1.65 |
| Sec1411   | 0    | 2.21 | 2.04 | 2.21 | 2.69 |
| Sec1412   | 1.58 | 2.19 | 1.12 | 0.48 | 1.48 |
| Sec1413   | NA   | NA   | NA   | 1.89 | NA   |
| Sec1414   | 0.11 | 0.39 | 0    | 0.2  | 0    |
| Sec1415   | NA   | 0.31 | 0    | 1.64 | 0    |
| Sec1512   | 0.29 | NA   | NA   | NA   | NA   |
| Sec16a    | NA   | 2.19 | 2.59 | 0    | 0    |
| Sec16b    | NA   | NA   | 1.25 | NA   | 1.82 |
| Sec22a    | NA   | 0.5  | 0.49 | 0.81 | 0.25 |
| Sec22b    | NA   | 0.68 | 1.96 | 1.45 | 0    |
| Sec22c    | NA   | NA   | 2.17 | 6.93 | 0.81 |
| Sec23a    | 1.13 | 1.35 | 1.99 | 1.7  | 0.28 |
| Sec23b    | 0.61 | 0.98 | 1.48 | 1.29 | NA   |
| Sec23ip   | 0.69 | 1.08 | 2.96 | 0.15 | 0    |
| Sec24a    | NA   | 1.62 | 0.95 | 0.98 | 0    |
| Sec24b    | 0.28 | 1.17 | 1.18 | 1.3  | NA   |
| Sec24c    | 0.15 | 0    | 1.62 | 4.12 | 3.58 |
| Sec24d    | 0.95 | 0.08 | 1.21 | 2.57 | 1    |
| Sec31a    | NA   | 1.27 | 1.35 | NA   | 6.42 |
| Sec31b    | NA   | NA   | NA   | 0.16 | NA   |
| Sec61a1   | NA   | 1.23 | 0.11 | 0    | 0    |
| Sec61a2   | 0.36 | 1.56 | 0.96 | 0.3  | 1.53 |
| Sec61b    | 0.27 | 0    | 0.05 | 0.62 | 0.44 |
| Sec61g    | 1.22 | 1.64 | 3.53 | 0    | 0    |
| Sec62     | NA   | 1.47 | 1.64 | 0.62 | 0.21 |
| Sec63     | 0.94 | 1.53 | 1.38 | 0.6  | 2.24 |
| Secisbp2  | 1.94 | 0    | 1.65 | 0.1  | 2.44 |
| Secisbp21 | NA   | 0.55 | 1.05 | 1.76 | 0    |

|          |      |      |      |      |      |
|----------|------|------|------|------|------|
| Sectm1   | 2.44 | NA   | NA   | NA   | NA   |
| Seh11    | 0.23 | 0.73 | 0    | 1.09 | 0    |
| Sel11    | NA   | 0.13 | 0.16 | 0.16 | 0    |
| Sel112   | NA   | NA   | 1.37 | NA   | 1.64 |
| Sel113   | NA   | 1.03 | 0.14 | 1.73 | NA   |
| Sele     | 0.05 | 0.15 | 0.85 | 4.01 | 4.7  |
| Selenbp1 | 0.72 | 1.47 | 2.39 | NA   | 2.99 |
| Selk     | 1.12 | NA   | 2.66 | 0    | 0.85 |
| Sell     | 0    | 0    | 0.52 | 2.06 | 0    |
| Selm     | NA   | NA   | 1.66 | 0.83 | 0    |
| Selp     | 0.45 | 0.39 | 1.03 | 2.99 | 0    |
| Selplg   | NA   | 1.73 | 0.09 | 1.69 | 0    |
| Selrc1   | NA   | 1.1  | 0.74 | 0.5  | NA   |
| Sema3a   | 0    | 1.23 | 0.57 | 0    | 2.29 |
| Sema3b   | 0.17 | 1.13 | 1.94 | 1.85 | 2.7  |
| Sema3c   | 0.67 | 0.64 | 0.3  | 1.43 | 0.68 |
| Sema3d   | 0.49 | 0.48 | 4.51 | 3.04 | 1.5  |
| Sema3e   | 0.27 | 1.32 | 1.15 | 1.2  | 1.11 |
| Sema3f   | 0.13 | 0.69 | 0    | 0.77 | 3.82 |
| Sema3g   | NA   | 2.51 | 0.81 | 1.48 | 0    |
| Sema4a   | 0    | 0.9  | 0.29 | 0.98 | 0.03 |
| Sema4b   | 0.44 | NA   | 4.91 | 0.35 | 1.65 |
| Sema4c   | 1.75 | 1.89 | 1.21 | 2.38 | 0    |
| Sema4d   | 1.35 | 1.49 | 3.12 | 0.64 | 2.73 |
| Sema4f   | 0    | 0.92 | 0.57 | 0    | 0    |
| Sema4g   | 1.06 | 1.43 | 0.16 | 0    | 2.09 |
| Sema5a   | 1.01 | 0.19 | 0.48 | 1.74 | 2.29 |
| Sema5b   | 0.75 | NA   | 2.53 | 0    | 0.9  |
| Sema6a   | 0.83 | 1.34 | 0.58 | 7.53 | 0    |
| Sema6b   | 0.06 | 1.27 | 0.67 | 0.31 | 0    |
| Sema6c   | 0    | 1.28 | 0.84 | 0.01 | 2.3  |
| Sema6d   | 0.18 | 1.25 | 1.04 | 2.04 | 1.09 |
| Sema7a   | 0    | 1.28 | 1.07 | 1.83 | 1.23 |
| Semg1    | NA   | NA   | NA   | NA   | 0    |
| Senp1    | 2.48 | NA   | 1.13 | 2.07 | 0.21 |
| Senp2    | 0.58 | 1.6  | 1.19 | 0.35 | 0    |
| Senp3    | 0.48 | 1.96 | 0    | 0.68 | 1.32 |
| Senp5    | 0.63 | 0.54 | 1.24 | 0.66 | 1.4  |
| Senp6    | 0    | 0.25 | 0.19 | 0.04 | 2.59 |
| Senp7    | NA   | 1.44 | 2.52 | 0.31 | 0    |
| Senp8    | 0    | NA   | 1.73 | 2.7  | 0    |

|           |      |      |      |      |      |
|-----------|------|------|------|------|------|
| 41897     | NA   | 1.77 | 0.34 | 1.24 | 0    |
| Sephs1    | 0.53 | 0    | 1.03 | 0.39 | 0    |
| Sephs2    | 0.84 | 2.03 | 0.56 | 2.12 | 5.51 |
| Sepn1     | 1.67 | NA   | 1.22 | 0.68 | 9.48 |
| Sepp1     | 0    | 1.85 | 3.32 | 1.39 | 3.12 |
| Sepsecs   | NA   | NA   | 1.21 | 0.72 | 0    |
| 41883     | NA   | NA   | 0    | 1.19 | NA   |
| 41892     | NA   | 0.63 | 0.54 | 0.3  | NA   |
| 41893     | NA   | 0.59 | 0.47 | 0.28 | NA   |
| 41894     | NA   | NA   | 0.42 | 1.74 | NA   |
| 41896     | NA   | NA   | NA   | 1.32 | NA   |
| 41884     | NA   | 1.88 | 5.93 | 0.35 | NA   |
| 41885     | NA   | NA   | 0    | 0.73 | NA   |
| 41886     | NA   | 1.6  | 2.24 | 2.56 | NA   |
| 41887     | NA   | 1.83 | 0.35 | NA   | NA   |
| 41888     | NA   | 0    | 0.67 | 0.86 | NA   |
| 41889     | NA   | 0.71 | 0.97 | 0.84 | NA   |
| 41890     | NA   | 0.61 | 0.13 | 1.26 | NA   |
| 41891     | NA   | 0    | 0.43 | 0    | NA   |
| Sepw1     | 1.11 | 2    | 4.95 | 0.47 | 0    |
| Sepx1     | 0.43 | NA   | NA   | NA   | 0    |
| Serac1    | 1.56 | NA   | 0.03 | 1.07 | 0    |
| Serbp1    | NA   | 0    | 1.39 | 0.12 | 0    |
| Serf2     | 1.93 | 1.42 | 0.61 | NA   | 0    |
| Sergef    | NA   | 1.61 | 1.46 | 2.16 | 0    |
| Serhl     | 0.93 | NA   | NA   | NA   | NA   |
| Serinc1   | NA   | 2.51 | 1.76 | 0.27 | 1.27 |
| Serinc2   | NA   | 1.36 | 0    | 1.14 | 0    |
| Serinc3   | NA   | 1.27 | 1.55 | 0    | 2.11 |
| Serinc4   | NA   | 1.57 | 0.49 | 2.7  | NA   |
| Serinc5   | NA   | 0    | 2.08 | 0    | NA   |
| Serp1     | NA   | 0.48 | 1.82 | 0.94 | 1.99 |
| Serp2     | NA   | NA   | 0.61 | 1.09 | 2.75 |
| Serpina1  | 0    | NA   | NA   | NA   | NA   |
| Serpina10 | 3.82 | 1.11 | 0.45 | 0.21 | 2.68 |
| Serpina11 | 0.32 | NA   | NA   | 0.16 | NA   |
| Serpina12 | 0.29 | NA   | 1.76 | 1.87 | NA   |
| Serpina5  | 1.68 | 0.1  | 1.64 | 0.44 | 0    |
| Serpina6  | 4.62 | 1.31 | 1.83 | 1.67 | 4.07 |
| Serpina7  | 0.8  | 1.01 | 0    | 0.81 | 5.46 |
| Serpina9  | 2.66 | NA   | 2.57 | 3.85 | NA   |



|           |      |      |      |       |      |
|-----------|------|------|------|-------|------|
| Serpinb10 | NA   | NA   | NA   | 5.64  | NA   |
| Serpinb11 | 0.92 | NA   | 1.23 | 1.43  | NA   |
| Serpinb12 | 3.61 | NA   | 0    | 1.24  | NA   |
| Serpinb13 | 0.19 | NA   | NA   | 2.32  | NA   |
| Serpinb2  | 0.39 | 0    | 0.74 | 0     | 0    |
| Serpinb5  | 5.31 | 0.98 | 0.1  | 0.27  | 1.38 |
| Serpinb6  | 0    | NA   | NA   | NA    | NA   |
| Serpinb7  | 2.17 | 0.75 | 0.88 | 1.26  | 0    |
| Serpinb8  | 0.24 | 2.82 | 0.94 | 0.69  | 1.71 |
| Serpinb9  | 0    | 1.4  | 2.35 | 1.8   | 0.13 |
| Serpincl  | 1.09 | 3.38 | 0.26 | 0.45  | 5.06 |
| Serpind1  | 1.33 | 1.45 | 1.37 | 1.63  | 0    |
| Serpine1  | 0.43 | 1.75 | 3.79 | 0.49  | 9.96 |
| Serpine2  | 1.6  | 0.16 | 3.06 | 0.85  | 0    |
| Serpinf1  | 0    | 0    | 2.23 | 1.87  | 0    |
| Serpinf2  | 1.13 | 2.03 | 0.57 | 1.74  | 2.87 |
| Serping1  | 0.58 | 1.66 | 0.35 | 0.7   | 2.58 |
| Serpinh1  | 0.69 | 0.93 | 2.01 | 2.03  | 0    |
| Serpini1  | NA   | 1.71 | 0.45 | 0.87  | 0.89 |
| Serpini2  | 1.76 | 4.69 | 0.84 | 0     | 0    |
| Sertad1   | 0.65 | NA   | 3.68 | 0.8   | 2.68 |
| Sertad2   | 0    | 0    | 2.93 | 1.24  | 1.58 |
| Sertad3   | 2.46 | 1.08 | 1.78 | 0.08  | 0    |
| Sertad4   | 7.16 | NA   | 0.62 | 1.92  | 1.87 |
| Sertm1    | NA   | NA   | 0    | 13.71 | NA   |
| Sesn1     | 0.1  | 0.15 | 2.66 | 0.03  | NA   |
| Sesn2     | 1.24 | NA   | 2.14 | 10.84 | 5.21 |
| Sesn3     | 1.47 | NA   | 3.21 | 0.47  | 0.71 |
| Sestd1    | 0.01 | NA   | 3.7  | 0     | 0.21 |
| Set       | 0.65 | 2.03 | 1.68 | 0.2   | 0    |
| Setbp1    | 1.51 | NA   | NA   | 0.28  | NA   |
| Setd1a    | NA   | 0.26 | 0    | 1.05  | 0.01 |
| Setd1b    | NA   | 0    | 1.82 | 1.1   | 0    |
| Setd2     | NA   | 0    | 0.64 | 0.97  | 1.95 |
| Setd3     | NA   | 2.05 | 1.02 | 0.94  | 0.7  |
| Setd4     | NA   | 0.56 | 1.8  | 0.57  | 0    |
| Setd5     | NA   | 1.53 | 0.59 | 0     | 0    |
| Setd6     | NA   | 0    | 0.11 | 3.65  | 0    |
| Setd7     | NA   | NA   | 1    | 0.48  | 0.97 |
| Setd8     | NA   | 0    | 0.69 | 2.06  | 0.03 |
| Setdb1    | 0.86 | 0.65 | 1.49 | 0.69  | 0.22 |

|           |      |      |      |      |       |
|-----------|------|------|------|------|-------|
| Setdb2    | NA   | NA   | 0.51 | 0.74 | 3.3   |
| Setmar    | 0    | 2.92 | 1.6  | 0.41 | 15.61 |
| Setx      | NA   | 0.02 | 1.98 | 0.01 | 0.14  |
| Sez6      | 0    | NA   | 1.23 | 1.13 | 0     |
| Sez6l     | 1.37 | 0.38 | 0.5  | 0.77 | 1.2   |
| Sez6l2    | NA   | 1.8  | 2.38 | 2.33 | 10.32 |
| Sf1       | NA   | 0.45 | 0.5  | 2.19 | 1.07  |
| Sf3a1     | 0.47 | 0.45 | 0.39 | 3.01 | 0.05  |
| Sf3a2     | 0    | 1.69 | 3.44 | 0    | 0     |
| Sf3a3     | 0    | 2.33 | 0.05 | 0.27 | 0     |
| Sf3b1     | 0.38 | 0.08 | 0.77 | 0.02 | 0.74  |
| Sf3b2     | 0.84 | 0    | 1.03 | 0    | 0     |
| Sf3b3     | 0.22 | 0    | 0.35 | 5.36 | 1.49  |
| Sf3b4     | 0.91 | 1.56 | 0.47 | 2.59 | 2.36  |
| Sf3b5     | 0.16 | 0.3  | 1.41 | 0.32 | 4.43  |
| Sf4       | 0.73 | NA   | NA   | NA   | 1.94  |
| Sfi1      | NA   | 0    | 0.65 | 0.46 | 0     |
| Sfmbt1    | 0.92 | 0    | 1.74 | 2    | 1.85  |
| Sfmbt2    | 0.44 | NA   | 1.21 | 3.11 | 0.67  |
| Sfn       | 0.55 | 1.78 | 2.67 | 2.09 | 0     |
| Sfpq      | 0    | 0    | 0.01 | 0.85 | 0.73  |
| Sfr1      | NA   | NA   | 1.61 | 3.17 | NA    |
| Sfrp1     | 0.58 | 0.04 | 0.43 | 1.11 | 2.08  |
| Sfrp2     | 0.4  | NA   | 0.25 | 2.99 | 0     |
| Sfrp4     | 1.79 | 1.41 | 0    | 0.77 | 5.54  |
| Sfrp5     | 0.49 | 1.39 | 1.09 | 3.28 | 0     |
| Sfrs1     | 0.15 | NA   | NA   | NA   | 0     |
| Sfrs10    | 0.32 | NA   | NA   | NA   | NA    |
| Sfrs11    | NA   | NA   | NA   | NA   | 1.87  |
| Sfrs12    | NA   | NA   | NA   | NA   | 0.8   |
| Sfrs12ip1 | NA   | NA   | NA   | NA   | 0     |
| Sfrs14    | 0    | NA   | NA   | NA   | 0     |
| Sfrs15    | NA   | NA   | NA   | NA   | 2.43  |
| Sfrs16    | 1.53 | NA   | NA   | NA   | 0.59  |
| Sfrs18    | NA   | NA   | NA   | NA   | 1.45  |
| Sfrs2     | 0.14 | NA   | NA   | NA   | 0     |
| Sfrs2ip   | 1.25 | NA   | NA   | NA   | 0     |
| Sfrs3     | 0.07 | NA   | NA   | NA   | 0     |
| Sfrs4     | NA   | NA   | NA   | NA   | 0.02  |
| Sfrs5     | 0.64 | NA   | NA   | NA   | 1.25  |
| Sfrs6     | 0.17 | NA   | NA   | NA   | 0     |

|        |      |      |      |      |      |
|--------|------|------|------|------|------|
| Sfrs7  | 0    | NA   | NA   | NA   | 1.27 |
| Sfrs8  | 2.69 | NA   | NA   | NA   | 1.5  |
| Sfrs9  | 0.66 | NA   | NA   | NA   | 0    |
| Sfswap | NA   | 0.47 | 1.27 | 1.49 | NA   |
| Sft2d1 | NA   | NA   | 0.39 | 0.97 | 0    |
| Sft2d2 | NA   | 0    | 0.3  | 0    | 1.18 |
| Sft2d3 | NA   | NA   | 1.81 | 1.18 | 2.71 |
| Sftpb  | 4.52 | 0    | 0.79 | 1.03 | 3.46 |
| Sftpc  | 4.01 | 1.08 | 1.28 | 0.96 | 1.73 |
| Sftpd  | 2.72 | 1.38 | 1.23 | 2.63 | 2.12 |
| Sfxn1  | 0.93 | 2.64 | 0.74 | 1.02 | 0.36 |
| Sfxn2  | 0    | NA   | 0.97 | 0.88 | 1.65 |
| Sfxn3  | 0    | 0    | 5.63 | 0    | 0.42 |
| Sfxn4  | 0    | NA   | 1.73 | 1.19 | 0    |
| Sfxn5  | 0.28 | NA   | 1.39 | 1.92 | 3.47 |
| Sgca   | 4.36 | 1.51 | 1.58 | 2.54 | 4.15 |
| Sgcb   | 1.84 | 0.73 | 1.48 | 0.71 | 0    |
| Sgcd   | 0.2  | 1    | 0.4  | 4.5  | 4.27 |
| Sgce   | 1.95 | 0.22 | 2.73 | 0.63 | 0.12 |
| Sgcg   | 0    | 1.06 | 1.33 | NA   | 0    |
| Sgcz   | 2.77 | NA   | NA   | 0.71 | NA   |
| Sgip1  | NA   | NA   | 0.55 | 1.44 | 0    |
| Sgk    | 0.45 | NA   | NA   | NA   | NA   |
| Sgk1   | NA   | 3.12 | 3.74 | 0.07 | 1.98 |
| Sgk2   | 0.71 | 2.06 | 0.99 | 0    | 3.81 |
| Sgk3   | 0.51 | NA   | 3.26 | 0.4  | 0    |
| Sgms1  | NA   | 0.81 | 1.97 | 5.09 | 0    |
| Sgms2  | NA   | NA   | 1.05 | 0    | 2.58 |
| Sgol1  | 0.07 | NA   | 1.76 | 0.65 | 1.81 |
| Sgol2  | 0.57 | NA   | 2.99 | 0.7  | 0    |
| Sgpl1  | 0.02 | 0.68 | 0.03 | 0.28 | 0.3  |
| Sgpp1  | 0.97 | 0    | 3.88 | 3.68 | 0    |
| Sgpp2  | NA   | NA   | 0.85 | 0    | 0    |
| Sgsh   | 0.27 | 1.9  | 4.21 | NA   | 0    |
| Sgsm1  | NA   | NA   | 0.97 | 1.23 | 0    |
| Sgsm2  | NA   | 0    | 1.35 | 0    | 0    |
| Sgsm3  | NA   | 0    | 2.84 | 1.04 | 2.19 |
| Sgta   | 3.54 | 3.01 | 4.2  | 1.05 | 1.51 |
| Sgtb   | 0.25 | NA   | 2.89 | 0.07 | 0.53 |
| Sh2b1  | NA   | 0    | 1.58 | 1.52 | 0    |
| Sh2b2  | NA   | 0.32 | 1.35 | 1.32 | 0    |

|          |      |      |      |      |       |
|----------|------|------|------|------|-------|
| Sh2b3    | NA   | 0    | 7.65 | 0.28 | NA    |
| Sh2d1a   | 2.94 | 0.13 | 0.52 | 2.34 | NA    |
| Sh2d2a   | 0.93 | 0    | 1.66 | 1.07 | 0     |
| Sh2d3c   | 0.9  | 1.44 | 0.62 | 0.61 | 0     |
| Sh2d4a   | 1.76 | 0.93 | 1    | 0.98 | 0     |
| Sh2d4b   | 2.15 | NA   | 1.81 | 0    | NA    |
| Sh2d5    | NA   | NA   | 1    | 6.37 | 0.08  |
| Sh2d6    | NA   | NA   | 1.75 | 2.31 | 0.22  |
| Sh2d7    | NA   | NA   | NA   | 0.6  | NA    |
| Sh3bgr   | 2.43 | 0.39 | 0.72 | 0.64 | 0.03  |
| Sh3bgr1  | 1.07 | 0.66 | 0.71 | 0.66 | 0     |
| Sh3bgr12 | 2.33 | NA   | 0.47 | 0    | 0     |
| Sh3bgr13 | 0.06 | 0.85 | 0.75 | 0    | 0.71  |
| Sh3bp1   | 0.03 | 1.1  | 1.29 | 1.4  | 0     |
| Sh3bp2   | 0.11 | 0.4  | 2.36 | 2.14 | 0.55  |
| Sh3bp4   | 0.07 | 1.89 | 2.57 | 3.9  | 1.08  |
| Sh3bp5   | 0.44 | 1.3  | 0.1  | 0.7  | 0     |
| Sh3bp51  | NA   | NA   | 2.28 | 7.69 | 0     |
| Sh3d19   | 1.34 | 1.06 | 1.15 | 4.5  | 1.96  |
| Sh3d21   | NA   | 2.77 | 2.29 | 3.26 | NA    |
| Sh3gl1   | 0.06 | 1.84 | 2.28 | 0    | 0.07  |
| Sh3gl2   | 1.03 | 1.61 | 0.85 | 1.19 | 1.97  |
| Sh3gl3   | 4.14 | 0.32 | 0.24 | 0.06 | 0     |
| Sh3glb1  | 0    | 2.56 | 2.06 | 1.47 | 14.29 |
| Sh3glb2  | 0.25 | 0.3  | 1.63 | 2.35 | 0     |
| Sh3kbp1  | 1.47 | NA   | 2.69 | 0.8  | 0.45  |
| Sh3pxd2a | NA   | 0.34 | 2.06 | 0.74 | 0     |
| Sh3pxd2b | NA   | NA   | 1.99 | 3.86 | 1.78  |
| Sh3rf1   | NA   | NA   | 0.93 | 1.56 | 1.26  |
| Sh3rf2   | 1.89 | NA   | 1.99 | 1.23 | 2.89  |
| Sh3rf3   | NA   | NA   | 1.97 | 0.37 | 0     |
| Sh3tc1   | 4.86 | 2.08 | 1.46 | 1.98 | 1.09  |
| Sh3tc2   | NA   | 0.61 | 1.83 | 2.95 | 1.69  |
| Sh3yl1   | 2.1  | 0    | 4.36 | 1.27 | 0     |
| Shank1   | NA   | 3.69 | 8.45 | 0    | 0     |
| Shank2   | 0.25 | 1.27 | 1.15 | 1.5  | 3.83  |
| Shank3   | 0.88 | NA   | 1.03 | 1.91 | 2.24  |
| Sharpin  | NA   | 0.57 | 0.92 | 0    | 1.86  |
| Shb      | 0    | 1.06 | 0.19 | NA   | 1.52  |
| Shbg     | 0.63 | 0.87 | 0    | 1.23 | 0     |
| Shc1     | 0    | 0.56 | 0.17 | 0.16 | 0.81  |

|          |      |      |      |      |      |
|----------|------|------|------|------|------|
| Shc2     | 0.4  | NA   | NA   | 0.45 | NA   |
| Shc3     | 2.02 | 1.47 | 1.65 | 0    | 2.53 |
| Shc4     | NA   | NA   | 0.35 | 2.67 | 5.1  |
| Shcbp1   | 2.29 | 0.18 | 1.95 | 0.06 | 1.63 |
| Shcbp11  | NA   | 0.17 | 0    | 0.35 | NA   |
| Shd      | 8.94 | NA   | 4.11 | 2.01 | 0    |
| She      | NA   | NA   | 0    | 4.46 | 3.17 |
| Shf      | NA   | NA   | 5.26 | 0.48 | 0    |
| Shfm1    | NA   | 1.25 | 0.08 | 0    | 4.01 |
| Shh      | 0.2  | 1.52 | 1.28 | 1.71 | 1.37 |
| Shisa2   | NA   | NA   | 5.71 | 0    | 1.25 |
| Shisa3   | NA   | NA   | 0.34 | 0.41 | 0.01 |
| Shisa4   | NA   | NA   | 2.35 | 1.03 | 3.1  |
| Shisa5   | NA   | NA   | 2.81 | 0.03 | 0.83 |
| Shisa6   | NA   | NA   | 0.71 | 0.72 | NA   |
| Shisa7   | NA   | NA   | 0.74 | 1.52 | NA   |
| Shisa9   | NA   | NA   | 2.25 | 1.63 | NA   |
| Shkbp1   | 0    | NA   | 1.39 | 2.6  | 0.08 |
| Shmt1    | 0.7  | 0.6  | 1.26 | 1.57 | 0.55 |
| Shmt2    | 0    | 0    | 0.34 | 0.71 | 1.07 |
| Shoc2    | NA   | 0.74 | 1.78 | 3.49 | 0    |
| Shox2    | 0.37 | 0    | 1.39 | 0.81 | 0    |
| Shpk     | NA   | 1.56 | 1.88 | 0.57 | 1.39 |
| Shprh    | 0    | NA   | 0.86 | 0    | 0    |
| Shq1     | NA   | 0    | 0.05 | 0.79 | 2.22 |
| Shroom1  | NA   | NA   | 0.99 | 3.4  | 0    |
| Shroom2  | NA   | 1.17 | 0    | 4.38 | 2.61 |
| Shroom3  | NA   | NA   | 0.59 | 1.48 | 0    |
| Shroom4  | NA   | NA   | 0.06 | 3.07 | 0.46 |
| Si       | 0.75 | NA   | NA   | NA   | 0.07 |
| Siae     | NA   | NA   | 0.2  | 0.92 | 0.49 |
| Siah2    | 0    | 1.62 | 2.52 | 0.18 | 3.59 |
| Siah3    | NA   | NA   | NA   | 0.96 | NA   |
| Sidt1    | NA   | 0    | 0.63 | 0.56 | 2.26 |
| Sidt2    | NA   | 1.34 | 2.46 | 1.07 | 2.48 |
| Sigirr   | NA   | 0    | 1.17 | 1.93 | 0    |
| Siglec1  | NA   | 1.45 | 0.34 | 1.58 | 2.1  |
| Siglec10 | 0.56 | NA   | NA   | NA   | NA   |
| Siglec15 | NA   | NA   | NA   | 0.87 | NA   |
| Siglec5  | 0.01 | 0    | 1.79 | 0.94 | 4.37 |
| Sigmar1  | NA   | 1.17 | 0.79 | 0    | 0    |

|         |      |      |      |      |      |
|---------|------|------|------|------|------|
| Sik1    | NA   | 0.98 | 0.89 | 0.97 | 0.98 |
| Sik2    | NA   | 1.01 | 2.37 | 1.48 | 0.7  |
| Sik3    | NA   | 0.54 | 0.12 | 1.95 | NA   |
| Sike1   | NA   | 1.42 | 0.38 | 0.68 | 0    |
| Sil1    | NA   | 3.04 | 3.95 | 0    | 0.98 |
| Sim1    | 0.93 | 0    | 0.52 | 0.22 | 0    |
| Sim2    | 0.75 | 0.79 | 0.75 | 0.1  | 0    |
| Simc1   | NA   | NA   | 0.45 | 1.17 | NA   |
| Sin3a   | 0.55 | NA   | 1.64 | 2.94 | 1.34 |
| Sin3b   | 0.58 | 0    | 0.37 | 2.65 | 1.16 |
| Sip1    | 0.03 | NA   | NA   | NA   | 0    |
| Sipa1   | 0.95 | 3    | 2.91 | NA   | 2.24 |
| Sipa111 | 0    | 0.9  | 0.27 | 0.41 | 0    |
| Sipa112 | 0.32 | NA   | 1.64 | 0.11 | 0    |
| Sipa113 | NA   | 3    | 3.33 | 0.86 | 1.93 |
| Sirpa   | NA   | 0.29 | 2.92 | 0.4  | 0    |
| Sirt1   | 0.98 | 0.1  | 1.74 | 0    | 1.73 |
| Sirt2   | 2.07 | 2.63 | 2.53 | 1.23 | 5.4  |
| Sirt3   | 0.79 | 0    | 1.69 | 2.06 | 0    |
| Sirt4   | 0.49 | 0    | 1.33 | 1.08 | 0    |
| Sirt5   | 0.71 | 1.36 | 2.33 | 2.28 | 0    |
| Sirt6   | 2.73 | 0    | 0    | 1.91 | 0    |
| Sirt7   | 0.22 | 2.56 | 2.48 | 1.73 | 1.46 |
| Sit1    | NA   | 0    | 0.4  | 0.52 | 0    |
| Siva1   | NA   | 1.13 | 1.33 | 0.32 | 0    |
| Six1    | 1.75 | 0.96 | 2.99 | 0    | 1.88 |
| Six2    | 0.33 | 1.27 | 2.42 | 0.74 | 3.45 |
| Six3    | 1.86 | 1.24 | 0.92 | 0    | 0    |
| Six4    | 0.03 | NA   | 0    | 0    | 0.72 |
| Six5    | 0.29 | 0    | 2.21 | 1.5  | 0    |
| Six6    | 0    | 2.5  | 0.28 | 0.03 | 2.36 |
| Ska1    | NA   | 0.4  | 5.5  | 0    | 0.68 |
| Ska2    | NA   | NA   | 1.93 | 0    | NA   |
| Ska3    | NA   | NA   | 1.95 | 0.75 | NA   |
| Skap1   | NA   | 0    | 0    | 0.71 | 1.71 |
| Skap2   | NA   | 1.61 | 0.91 | 1.96 | 0    |
| Ski     | 0.16 | 1.11 | 2.62 | 0.64 | 0.21 |
| Skida1  | NA   | NA   | 0.3  | 4.3  | NA   |
| Skil    | 0    | 0    | 1.56 | 0.07 | 0    |
| Skiv21  | 0.98 | 0.1  | 2.54 | 0.84 | 2.63 |
| Skiv212 | NA   | 0.36 | 1.22 | 0    | 0    |

|         |      |      |      |      |      |
|---------|------|------|------|------|------|
| Skor1   | NA   | NA   | NA   | 4.53 | NA   |
| Skor2   | NA   | NA   | NA   | 1.71 | NA   |
| Skp1a   | 1.31 | NA   | NA   | NA   | NA   |
| Skp2    | 1.14 | 0.13 | 1.49 | 0.41 | 0    |
| Sla     | 0.7  | 0.21 | 0.03 | 0.98 | 0    |
| Sla2    | 0.53 | NA   | 1.56 | 0.85 | 0    |
| Slain1  | NA   | NA   | 1.42 | 4.69 | 2.16 |
| Slain2  | NA   | NA   | 0.74 | 0.75 | 0    |
| Slamf1  | 0    | 0    | 4.09 | 0.53 | 0.68 |
| Slamf6  | 2.62 | NA   | 0    | 2.99 | NA   |
| Slamf7  | 0.05 | 1    | 0.92 | 0.59 | 5.42 |
| Slamf8  | 1.12 | 0.6  | 1.78 | NA   | 2.01 |
| Slamf9  | 0.42 | NA   | 1.11 | 5.81 | NA   |
| Slbp    | 5.6  | 0    | 2.03 | 0.76 | 0    |
| Slc10a1 | 0.44 | 0    | 0.76 | 1.11 | 0.11 |
| Slc10a2 | 1.78 | 0.91 | 4.23 | 0    | 2.44 |
| Slc10a3 | 0    | 2.56 | 2.51 | NA   | 0    |
| Slc10a4 | NA   | NA   | NA   | 0    | NA   |
| Slc10a5 | NA   | NA   | NA   | 0    | NA   |
| Slc10a6 | NA   | NA   | NA   | 1.45 | NA   |
| Slc10a7 | NA   | NA   | 0    | 0    | 0    |
| Slc11a1 | 0    | 0.4  | 0.01 | 1.38 | 0    |
| Slc11a2 | 0.2  | 0.71 | 3.54 | 0.05 | 0    |
| Slc12a1 | 0.56 | 1.48 | 0.4  | 3.4  | 2.09 |
| Slc12a2 | 0    | 1.37 | 2.79 | 2.52 | 1.48 |
| Slc12a3 | 0    | 1.29 | 0.41 | 1.14 | 2.63 |
| Slc12a4 | NA   | 1.33 | 3.23 | 0.48 | 2.06 |
| Slc12a5 | 2.63 | 1.07 | 0.89 | 1.4  | 2.42 |
| Slc12a6 | 0.48 | 1.69 | 0.68 | 0.8  | 0.63 |
| Slc12a7 | 0    | 0.56 | 2.1  | 1.2  | 0    |
| Slc12a8 | 0.08 | 1.16 | 1.06 | 0.81 | 0    |
| Slc12a9 | 0.27 | 0    | 3.49 | 1.47 | 1.71 |
| Slc13a1 | 0    | 1.46 | 1.18 | 0    | 0.99 |
| Slc13a2 | 1.79 | 0.68 | 1.85 | 0.04 | 3.88 |
| Slc13a3 | 0.49 | 0.63 | 1.06 | 2.16 | 0    |
| Slc13a4 | 3.18 | 1.52 | 0    | 2.26 | 0    |
| Slc13a5 | 3.41 | NA   | 1.85 | 2.44 | 0.82 |
| Slc14a1 | 0.23 | 2.69 | 0.14 | 1.48 | 1.08 |
| Slc14a2 | 3.71 | 1.82 | 0.86 | 0.57 | 1.96 |
| Slc15a1 | 2.24 | 1.15 | 0.81 | 0.96 | 0    |
| Slc15a2 | 0.43 | 1.56 | 0.2  | 0    | 1.16 |

|          |      |      |      |       |       |
|----------|------|------|------|-------|-------|
| Slc15a3  | 1.16 | 2.38 | 1.28 | NA    | 0     |
| Slc15a4  | 0.16 | NA   | 0.26 | 0     | 0     |
| Slc15a5  | NA   | NA   | NA   | 1.44  | NA    |
| Slc16a1  | 0    | 0.66 | 1.72 | 0.79  | 0.6   |
| Slc16a10 | 0.39 | 0    | 0.5  | 0.1   | 0.24  |
| Slc16a11 | 3.59 | NA   | 2.41 | 0.58  | 3.05  |
| Slc16a12 | NA   | NA   | NA   | 1.19  | NA    |
| Slc16a13 | 0.01 | NA   | NA   | 10.14 | NA    |
| Slc16a14 | 0.75 | NA   | 1.4  | 0.13  | 0     |
| Slc16a2  | 1.64 | 0.47 | 0.75 | 0     | 0.83  |
| Slc16a3  | NA   | 0.67 | 2.06 | 1.37  | 0     |
| Slc16a4  | 1    | 1.01 | 0.17 | 0.84  | 0.14  |
| Slc16a5  | 0    | 1.18 | 0.72 | 1.61  | 0     |
| Slc16a6  | 0.38 | 0.12 | 1.69 | 1.47  | 10.91 |
| Slc16a7  | 1.24 | 2.92 | 1.77 | 2.57  | 0     |
| Slc16a8  | 1.66 | 0.98 | 1.07 | 1.99  | 2.37  |
| Slc16a9  | 1.52 | NA   | 3.66 | 1.32  | 1.6   |
| Slc17a1  | 2.17 | 0.1  | 4.13 | 0.48  | 0     |
| Slc17a2  | 1.59 | 1.76 | 0.9  | 1.06  | 1.91  |
| Slc17a3  | 0.62 | 1.55 | 1.1  | 2.24  | 3.38  |
| Slc17a4  | NA   | NA   | NA   | 0.46  | NA    |
| Slc17a5  | 0    | 2.08 | 1.64 | 0     | 0     |
| Slc17a6  | 1    | 0    | 1.29 | 0     | 0     |
| Slc17a7  | 1.61 | 1.61 | 0.82 | 1.68  | 0     |
| Slc17a8  | 0    | NA   | NA   | 0     | NA    |
| Slc17a9  | NA   | 0.51 | 1.36 | 0.43  | 0.65  |
| Slc18a1  | 0.92 | 0.98 | 0.95 | 1.6   | 2.09  |
| Slc18a2  | 0    | 0.61 | 0.45 | 1.36  | 0     |
| Slc18a3  | NA   | 2.04 | 0    | 1.01  | 21.82 |
| Slc18b1  | NA   | NA   | 0.34 | 0     | NA    |
| Slc19a1  | 0    | 1.32 | 0    | 2.16  | 0.77  |
| Slc19a2  | 2.26 | 0.79 | 0    | 0.99  | 0     |
| Slc19a3  | 0.42 | 1.28 | 0    | 1.26  | 2.92  |
| Slc1a1   | 0.72 | 0.89 | 0    | 0     | 0     |
| Slc1a2   | 2.27 | 1.39 | 0.2  | 2.19  | 1.5   |
| Slc1a3   | 1.32 | 0    | 1.06 | 0.42  | 1.94  |
| Slc1a4   | 0.25 | 0.55 | 1.98 | 0.94  | 0     |
| Slc1a5   | 0    | 1.18 | 1.58 | 3.1   | 0.58  |
| Slc1a6   | 1.78 | 2.66 | 2.96 | 2.8   | 0     |
| Slc1a7   | 3.65 | 0.14 | 2.27 | 0.3   | 0     |
| Slc20a1  | 0.71 | 0.08 | 0.52 | 0.95  | 0.62  |



|          |      |      |      |      |      |
|----------|------|------|------|------|------|
| Slc20a2  | 0.63 | 0    | 1.28 | 2.27 | 0.68 |
| Slc22a1  | 0.81 | 2.25 | 1.31 | 0.93 | 1.51 |
| Slc22a12 | 0.83 | NA   | 0    | 1.08 | 1.39 |
| Slc22a13 | 0    | 2.03 | 0    | 0.85 | 1.97 |
| Slc22a14 | NA   | 3.31 | 0.07 | 3.81 | 0    |
| Slc22a15 | NA   | NA   | 0.18 | 1.47 | 2.75 |
| Slc22a16 | 0.57 | NA   | 2.9  | 0    | 1.1  |
| Slc22a17 | 0    | 1.84 | 2.07 | 0.04 | 1.35 |
| Slc22a18 | 0.56 | 1.22 | 1.14 | 0.19 | 1.74 |
| Slc22a2  | 0.07 | 0.12 | 0.14 | 0.79 | 1.83 |
| Slc22a20 | NA   | NA   | NA   | 0    | NA   |
| Slc22a23 | NA   | NA   | 1.65 | 0.67 | 0    |
| Slc22a3  | 6.48 | 4.16 | 0    | 0.82 | 0    |
| Slc22a4  | 0    | 4.56 | 1.66 | 0.16 | 1.53 |
| Slc22a5  | 0.57 | 1.13 | 0.04 | 1.4  | 0    |
| Slc22a6  | 0.7  | 0    | 0.05 | 0    | 5.75 |
| Slc22a7  | 0    | 1.54 | 1.76 | 0.69 | 0    |
| Slc22a8  | 0    | 1.3  | 0.83 | 1.67 | 0    |
| Slc22a9  | 7.41 | NA   | NA   | NA   | 0    |
| Slc23a1  | 0    | NA   | 0.12 | 0.78 | 0    |
| Slc23a2  | 1.89 | 0.71 | 0.25 | 2.67 | 0    |
| Slc23a3  | 0.67 | NA   | 1.41 | 0    | 7.67 |
| Slc24a1  | 0    | 0.3  | 0.29 | 1.67 | 1.03 |
| Slc24a2  | 0.6  | 0.88 | 0.03 | 1.86 | 2.12 |
| Slc24a3  | 0.52 | 0.45 | 0.53 | 1.21 | 0    |
| Slc24a4  | 0.33 | NA   | 0.92 | 2.16 | 0    |
| Slc24a5  | 2.61 | NA   | NA   | 2.97 | NA   |
| Slc24a6  | 0.63 | 2.44 | 2.16 | 0.94 | 1.47 |
| Slc25a1  | 0    | 1.88 | 4.64 | 2.12 | 0    |
| Slc25a10 | 0.28 | 3.59 | 1.83 | 0    | 2.4  |
| Slc25a11 | 0    | 0.05 | 0.07 | 1.48 | 1.15 |
| Slc25a12 | 0.97 | 0.6  | 1.22 | 1.86 | 0    |
| Slc25a13 | 0.02 | 0.06 | 3.04 | 0    | 1.26 |
| Slc25a14 | 0.2  | 0.72 | 0.87 | 1.57 | 1.41 |
| Slc25a15 | 0.53 | 0    | 1.89 | 3.21 | 0    |
| Slc25a16 | 0    | 1.28 | 2.58 | 1.78 | 0    |
| Slc25a17 | 0    | 0    | 0.77 | 1.34 | 0.6  |
| Slc25a18 | 0.29 | NA   | 0.21 | 0    | 0    |
| Slc25a19 | 0.05 | NA   | 0.71 | 1.91 | 1.63 |
| Slc25a2  | 0.59 | NA   | 0    | 0.39 | 1.25 |
| Slc25a20 | 0    | 0    | 0    | 0.72 | 4.31 |

|          |      |      |      |       |      |
|----------|------|------|------|-------|------|
| Slc25a21 | 3.81 | NA   | NA   | 0.53  | NA   |
| Slc25a22 | 0.55 | 1.51 | 4.38 | 5.2   | 3.2  |
| Slc25a23 | NA   | 1.72 | 3.98 | 2.27  | 0    |
| Slc25a24 | 0.24 | 0.46 | 0.78 | 0.79  | 0.73 |
| Slc25a25 | 1.14 | NA   | 0.02 | 4.11  | 0    |
| Slc25a26 | 0.19 | NA   | 0    | 0.95  | 0    |
| Slc25a27 | 0.14 | NA   | 0.39 | 0     | 1.07 |
| Slc25a28 | 0.84 | 0.11 | 1.95 | 0     | 0    |
| Slc25a29 | 9.77 | NA   | 0.91 | 1.13  | 1.17 |
| Slc25a3  | 0.41 | 0.65 | 4.46 | 0.55  | 2.12 |
| Slc25a30 | 1.39 | 0.27 | 0.78 | 0     | 0    |
| Slc25a31 | NA   | 0    | 0.81 | 0     | 0.19 |
| Slc25a32 | NA   | 0    | 5.1  | 1.97  | 0    |
| Slc25a33 | NA   | NA   | 3.27 | 1.34  | 0    |
| Slc25a34 | NA   | NA   | 0.67 | 1.58  | 7.08 |
| Slc25a35 | NA   | NA   | 0.37 | 2.32  | 0    |
| Slc25a36 | NA   | 0.19 | 1.94 | 0.98  | 0    |
| Slc25a37 | NA   | 1.02 | 0.74 | 2     | 2.27 |
| Slc25a38 | NA   | 0    | 1.76 | 0.78  | 0    |
| Slc25a39 | NA   | NA   | 1.09 | 0.31  | 0    |
| Slc25a4  | 0.11 | 0.71 | 0.29 | 0.16  | 1.38 |
| Slc25a40 | NA   | 4.04 | 1.19 | 0.45  | 0    |
| Slc25a41 | NA   | NA   | 2.74 | 1.12  | NA   |
| Slc25a42 | NA   | 1.99 | 0.23 | 1.39  | 0    |
| Slc25a43 | NA   | NA   | NA   | 2.62  | NA   |
| Slc25a44 | NA   | 1.47 | 1.94 | 1.84  | 2.06 |
| Slc25a45 | NA   | NA   | 1.35 | 0.18  | 0    |
| Slc25a46 | NA   | 2.22 | 1.31 | 0.83  | 0    |
| Slc25a47 | NA   | NA   | 1.86 | 1.41  | NA   |
| Slc25a48 | NA   | NA   | 0.37 | 0.85  | NA   |
| Slc25a5  | 0.28 | 3.18 | 1.48 | 0.77  | 0    |
| Slc25a51 | NA   | NA   | 1.8  | 0.84  | NA   |
| Slc25a53 | NA   | NA   | 0.44 | 0     | NA   |
| Slc26a1  | 1.06 | 1.37 | 1.04 | 3.22  | 1.13 |
| Slc26a10 | NA   | 0.04 | 0.13 | 1.05  | 1.31 |
| Slc26a11 | 1.1  | NA   | 3.12 | 6.07  | 0    |
| Slc26a2  | 0.41 | 1.61 | 1.68 | 4.72  | 0    |
| Slc26a3  | 0.73 | 0.72 | 0.45 | 12.87 | 2.26 |
| Slc26a4  | 3.21 | 0.05 | 0.62 | 0.16  | 0.01 |
| Slc26a5  | NA   | NA   | NA   | 1.83  | NA   |
| Slc26a6  | 0    | 2.44 | 0.82 | 5.56  | 0    |

|          |      |      |      |      |      |
|----------|------|------|------|------|------|
| Slc26a7  | 0.32 | NA   | 0.84 | NA   | 1.15 |
| Slc26a8  | 0    | NA   | 0    | 4.19 | 0    |
| Slc26a9  | 0.24 | NA   | NA   | 2.39 | NA   |
| Slc27a1  | 0.28 | NA   | 2.24 | 0.75 | 4.24 |
| Slc27a2  | 1.97 | 1.95 | 1.03 | 1.41 | 1.67 |
| Slc27a3  | 0    | 1.46 | 1.81 | 2.56 | 0    |
| Slc27a4  | 3.39 | NA   | 0.36 | 0    | 0.06 |
| Slc27a5  | 0    | 0.42 | 1.81 | 0.42 | 1.21 |
| Slc27a6  | 4.73 | NA   | NA   | 0.99 | NA   |
| Slc28a1  | NA   | NA   | NA   | 1.93 | NA   |
| Slc28a2  | 1.24 | NA   | NA   | 1.87 | NA   |
| Slc28a3  | 0.53 | 1.78 | 1.01 | 1.51 | 0    |
| Slc29a1  | 0    | 0    | 0    | 2.54 | 2.64 |
| Slc29a2  | 1.47 | 2.51 | 0.03 | 2.49 | 0.34 |
| Slc29a3  | 0.22 | 0    | 0.35 | 1.78 | 0.88 |
| Slc29a4  | 2.77 | NA   | 0.69 | 0    | NA   |
| Slc2a1   | 0.6  | 2.68 | 1.99 | 0    | 2.73 |
| Slc2a10  | 1.06 | 1.29 | 0.44 | 1.47 | 1.71 |
| Slc2a12  | 2.18 | NA   | 0.13 | 0.75 | 0    |
| Slc2a13  | NA   | NA   | 0    | 1.72 | 0.59 |
| Slc2a2   | 0    | 2.5  | 3.09 | 1.02 | 2.89 |
| Slc2a3   | 0.55 | 2.68 | 0.5  | 0    | 0    |
| Slc2a4   | 0    | 1.35 | 0.19 | 1.16 | 4.42 |
| Slc2a5   | 0.86 | 0.13 | 2.42 | 0.82 | 3.61 |
| Slc2a6   | 0.07 | 1.05 | 1.56 | 0.67 | 0.49 |
| Slc2a7   | NA   | NA   | NA   | 0.39 | NA   |
| Slc2a8   | 0    | 0.84 | 2.1  | 0.35 | 1.49 |
| Slc2a9   | 0.68 | 3.47 | 2.82 | 2.12 | 1.71 |
| Slc30a1  | 0    | 1.75 | 1.58 | 2.14 | 0.06 |
| Slc30a10 | NA   | 1.02 | 0.6  | 2.38 | 3.65 |
| Slc30a2  | 1.99 | NA   | 0.08 | 1.69 | 1.14 |
| Slc30a3  | 0.9  | 2.26 | 0.76 | 0.9  | 1.1  |
| Slc30a4  | 0.72 | 1.85 | 4.75 | 0.57 | 0    |
| Slc30a5  | 0.83 | 0.41 | 1.87 | 0.66 | 0    |
| Slc30a6  | 0.51 | 2.34 | 2.14 | 1.08 | 2.57 |
| Slc30a7  | 0.85 | NA   | 2.32 | 0    | 1.52 |
| Slc30a8  | 0.65 | NA   | 1.56 | 1.44 | 0    |
| Slc30a9  | 0.63 | 1.77 | 2.49 | 5.11 | 1.98 |
| Slc31a1  | 1.24 | 0    | 2.38 | 1.22 | 2.99 |
| Slc31a2  | 0.04 | 0.66 | 1.96 | 1.12 | 1.12 |
| Slc32a1  | NA   | NA   | 0.73 | 0.86 | 0    |

|          |      |      |      |      |       |
|----------|------|------|------|------|-------|
| Slc33a1  | 1.92 | 1.47 | 3.48 | 1.45 | 0     |
| Slc34a1  | 0    | 1.35 | 0.75 | 0.13 | 10.13 |
| Slc34a2  | 1.7  | 0.7  | 0.28 | 0    | 1.31  |
| Slc34a3  | 1.29 | NA   | 2.4  | 0.47 | NA    |
| Slc35a1  | 0.51 | 3.07 | 1.63 | 1.49 | NA    |
| Slc35a2  | 1.64 | 0.35 | 0.68 | 0.48 | 0     |
| Slc35a3  | 0.14 | 0.94 | 0.65 | 0.56 | 2.02  |
| Slc35a4  | 0.14 | NA   | 0.62 | 2.57 | 1.62  |
| Slc35a5  | 0    | 0.07 | 0.75 | 1.9  | 0     |
| Slc35b1  | 0    | 0.17 | 1.31 | 0.33 | 0     |
| Slc35b2  | NA   | NA   | 1.22 | 0    | 1.2   |
| Slc35b3  | 0.32 | NA   | 2.81 | 1.18 | 3.21  |
| Slc35b4  | 3.11 | NA   | 1.4  | 0.81 | 0.11  |
| Slc35c1  | 0.02 | 1.63 | 3.56 | 2.99 | 0     |
| Slc35c2  | 0.18 | 0.8  | 1.1  | 4.63 | 1.34  |
| Slc35d1  | 0.48 | 0    | 0.19 | 5.73 | 1.07  |
| Slc35d2  | NA   | 0.83 | 4.43 | 1.69 | 3.66  |
| Slc35d3  | 0.22 | NA   | 2.79 | 0.55 | 5.05  |
| Slc35e1  | NA   | 1.03 | 1.73 | 0    | 7.76  |
| Slc35e2  | NA   | 1.41 | 3.51 | 8.28 | 0     |
| Slc35e3  | 0.23 | 0.1  | 0.7  | 1.16 | 0.17  |
| Slc35e4  | 0.08 | NA   | 0.54 | 6.45 | 1.47  |
| Slc35f1  | 0.88 | NA   | 0.58 | 0    | 0.34  |
| Slc35f2  | 2.39 | 0    | 0.57 | 0.86 | NA    |
| Slc35f3  | 2.27 | NA   | 0.33 | 2.72 | 2.79  |
| Slc35f4  | 0.82 | NA   | 2.09 | 1.67 | 2.1   |
| Slc35f5  | NA   | 0    | 1.05 | 0    | 0     |
| Slc35f6  | NA   | 1.26 | 2.52 | 1.29 | NA    |
| Slc35g1  | NA   | NA   | 2.41 | 0.33 | NA    |
| Slc35g2  | NA   | NA   | NA   | 0    | NA    |
| Slc35g3  | NA   | NA   | 1.59 | 2.66 | NA    |
| Slc36a1  | 0.33 | 0.85 | 2.08 | 3.08 | 1.11  |
| Slc36a2  | 0.94 | NA   | NA   | 1.08 | NA    |
| Slc36a3  | 0.33 | NA   | NA   | 0    | NA    |
| Slc36a4  | 0.47 | NA   | 3.13 | 1.69 | 3.74  |
| Slc37a1  | 1.18 | 0.38 | 1.63 | 1.18 | 0.71  |
| Slc37a2  | NA   | NA   | 1.9  | 4.91 | 0     |
| Slc37a3  | 1.19 | NA   | 1.67 | 0.1  | 0     |
| Slc37a4  | 0    | 1.28 | 1.04 | 0.82 | 1.71  |
| Slc38a1  | 0.9  | 0    | 1.35 | 2.02 | 0     |
| Slc38a10 | NA   | 0.71 | 0.9  | 0    | 0.3   |

|          |      |      |      |      |      |
|----------|------|------|------|------|------|
| Slc38a11 | NA   | NA   | NA   | 2    | NA   |
| Slc38a2  | 0    | 0.53 | 1.91 | 1.7  | 0    |
| Slc38a3  | 2.1  | 2.26 | 0.1  | 1.29 | 0    |
| Slc38a4  | 0.98 | 2.79 | 0.51 | 2.52 | 2.85 |
| Slc38a5  | 0.68 | NA   | 0    | 0    | 0.35 |
| Slc38a6  | NA   | 2.13 | 0.94 | 1.74 | NA   |
| Slc38a7  | NA   | 0.99 | 0.61 | 0.97 | 0    |
| Slc38a8  | NA   | NA   | NA   | 1.73 | NA   |
| Slc38a9  | NA   | NA   | 2.17 | 1.08 | 0.2  |
| Slc39a1  | 0.51 | 2.9  | 2.25 | 1.21 | 0    |
| Slc39a10 | 0.17 | NA   | 2.03 | 0.27 | 0    |
| Slc39a11 | 0.02 | NA   | 1.15 | 0.73 | 7.04 |
| Slc39a12 | NA   | NA   | 0.97 | 0.7  | NA   |
| Slc39a13 | 0.99 | NA   | 4.79 | 3.25 | 0.46 |
| Slc39a14 | 1.44 | 2.01 | 0.85 | 2.33 | 1.02 |
| Slc39a2  | 2.48 | 2.42 | 0.02 | 0    | 4.49 |
| Slc39a3  | 0    | NA   | 0.14 | 1.32 | 1.14 |
| Slc39a4  | 0.3  | 0.77 | 3.27 | 0.91 | 3.3  |
| Slc39a5  | 1.08 | NA   | 1.07 | 0.59 | 0    |
| Slc39a6  | 1.26 | 0    | 2.46 | 0.87 | 0    |
| Slc39a7  | 2.82 | NA   | NA   | 0    | 2.54 |
| Slc39a8  | 2.85 | 0    | 4.34 | 0.24 | 0    |
| Slc39a9  | 1.34 | 0.56 | 0.48 | 0.85 | 0    |
| Slc3a1   | 1.22 | 1.56 | 0    | NA   | 0    |
| Slc3a2   | 1.48 | 1.85 | 2.17 | 1.06 | 1.24 |
| Slc40a1  | 0.19 | NA   | 2.19 | 4.28 | 2.42 |
| Slc41a1  | 0    | NA   | 0.66 | 1.61 | 2.18 |
| Slc41a2  | 2.88 | NA   | 1.6  | 0.2  | 2.72 |
| Slc41a3  | 1.31 | 0    | 1.13 | 1.77 | 0    |
| Slc43a1  | 0.65 | 0    | 5.89 | 0.26 | 0.62 |
| Slc43a2  | NA   | NA   | 2.47 | 1.5  | 3.3  |
| Slc43a3  | 0.31 | 1.29 | 2.95 | 0.89 | 6.79 |
| Slc44a1  | NA   | 2.05 | 0.68 | 0    | 0    |
| Slc44a2  | NA   | NA   | 0.61 | 0.79 | 0    |
| Slc44a3  | NA   | NA   | 0    | 0.06 | 1.25 |
| Slc44a4  | NA   | 1.71 | 4.04 | 2.39 | 0    |
| Slc44a5  | NA   | NA   | NA   | 0.6  | NA   |
| Slc45a1  | NA   | NA   | 1.23 | 2.78 | 0    |
| Slc45a2  | NA   | 0.43 | 0.47 | 0.48 | 3.67 |
| Slc45a3  | NA   | NA   | 0.11 | 1.11 | 0    |
| Slc45a4  | NA   | NA   | 2.06 | 0    | 0.82 |

|          |      |      |      |       |      |
|----------|------|------|------|-------|------|
| Slc46a1  | NA   | NA   | 0.39 | 1.49  | 0    |
| Slc46a2  | NA   | NA   | 1.88 | 1.27  | 0    |
| Slc46a3  | NA   | 2.87 | 1.12 | 0     | 0.4  |
| Slc47a1  | NA   | 0    | 1.83 | 1.41  | 0.78 |
| Slc47a2  | NA   | NA   | NA   | 0.22  | NA   |
| Slc48a1  | NA   | 0.29 | 2    | 0.65  | 0    |
| Slc4a1   | 0.76 | 0.99 | 0.27 | 0.64  | 4.79 |
| Slc4a10  | 2.03 | 1.77 | 1.55 | 1.97  | 2.54 |
| Slc4a11  | 0.98 | NA   | 3.49 | 4.12  | 0    |
| Slc4a1ap | 0    | 1.24 | 1.28 | 0.88  | 0.22 |
| Slc4a2   | 1.12 | 1.52 | 1.97 | 0.78  | 2.69 |
| Slc4a3   | 0.69 | 1.02 | 0.63 | 0.95  | 0    |
| Slc4a4   | 0.06 | 0.52 | 0.38 | 0.03  | 1.91 |
| Slc4a5   | NA   | 0.66 | 0.91 | 8.57  | 3.04 |
| Slc4a7   | 0.41 | 0.66 | 0.04 | 0     | 0    |
| Slc4a8   | 2.07 | 0.81 | 0.68 | 0.14  | 0.56 |
| Slc4a9   | 0.41 | NA   | 3.98 | 0     | 5.42 |
| Slc50a1  | NA   | 4.34 | 0.25 | 0     | NA   |
| Slc51a   | NA   | NA   | 0.09 | 0     | NA   |
| Slc51b   | NA   | NA   | 1.65 | 2.04  | NA   |
| Slc52a2  | NA   | 0    | 1.02 | 12.93 | NA   |
| Slc52a3  | NA   | NA   | 0.99 | 4.08  | NA   |
| Slc5a1   | 0    | 1.26 | 1.12 | 1.5   | 2.2  |
| Slc5a10  | 0.67 | NA   | 0.54 | 0.09  | 0    |
| Slc5a11  | 0.68 | NA   | 0.98 | 0     | 0    |
| Slc5a12  | 2.25 | 0.21 | 0.7  | 1.32  | 0    |
| Slc5a2   | 0.89 | 1.56 | 1.41 | NA    | 0    |
| Slc5a3   | 0    | 0.76 | 0.89 | 1.09  | 2.14 |
| Slc5a5   | 0    | 0.58 | 0    | 2.25  | 0    |
| Slc5a6   | 0.03 | 0    | 4.11 | 2.07  | 1.92 |
| Slc5a7   | 0    | 1.98 | 0.96 | 0.31  | 1.29 |
| Slc5a8   | 0    | NA   | 3.07 | 1.42  | 0    |
| Slc5a9   | 0.06 | NA   | 0.93 | 1.53  | 0    |
| Slc6a1   | 0.85 | 3.34 | 1.7  | 1.96  | 0    |
| Slc6a11  | NA   | 1.89 | 0.41 | 2.57  | 2.2  |
| Slc6a12  | 0.2  | 3.17 | 0    | 1.07  | 0    |
| Slc6a13  | 1.39 | 2.14 | 1.55 | 1.78  | 0    |
| Slc6a14  | 1.46 | 0.05 | 1.32 | 0.43  | 1.13 |
| Slc6a15  | 0.37 | 1.79 | 2.25 | 1.03  | 0    |
| Slc6a16  | NA   | 0    | 2.93 | 1.25  | 0    |
| Slc6a17  | 2.32 | NA   | 1.08 | 0.31  | 0    |

|          |      |      |      |      |      |
|----------|------|------|------|------|------|
| Slc6a18  | 3.63 | NA   | 0.15 | 0.52 | 4.03 |
| Slc6a19  | 0.39 | NA   | 0.74 | 0.2  | 0    |
| Slc6a2   | 0.05 | 0.94 | 0.32 | 2.99 | 2.31 |
| Slc6a20  | 0    | NA   | NA   | NA   | NA   |
| Slc6a3   | 1.13 | 0.17 | 1.91 | 0.67 | 0    |
| Slc6a4   | 0.58 | 1.14 | 1.28 | 0.64 | 0    |
| Slc6a5   | 0    | 1.33 | 1.54 | 0.02 | 0    |
| Slc6a6   | 1.03 | 0.39 | 1.78 | 2.48 | 0    |
| Slc6a7   | 1.04 | 0.08 | 0.7  | 3.25 | 0    |
| Slc6a8   | 0    | 0.84 | 1.53 | 0.07 | 1.74 |
| Slc6a9   | 0.45 | 1.21 | 1.52 | 0.85 | 2.51 |
| Slc7a1   | 0.08 | 0.75 | 2.59 | 2.11 | 0.6  |
| Slc7a10  | 0.85 | 1.79 | 1.52 | NA   | 3.56 |
| Slc7a11  | 0    | 0.23 | 0.38 | 1.6  | 1.22 |
| Slc7a13  | 1.74 | NA   | 1.2  | 0    | 2.78 |
| Slc7a14  | NA   | NA   | 1.22 | 2.62 | 0.63 |
| Slc7a2   | 0.74 | 1.36 | 0.97 | 1.78 | 0    |
| Slc7a3   | 0.3  | NA   | 1.53 | 3.92 | 0.87 |
| Slc7a4   | 1.15 | 0.37 | 4.78 | 0    | 3.63 |
| Slc7a5   | 0.52 | 1.31 | 1.32 | 1.88 | NA   |
| Slc7a6   | 0    | 0    | 1.21 | NA   | 2.17 |
| Slc7a6os | NA   | NA   | 1.34 | 0.74 | 0    |
| Slc7a7   | 0    | 2.87 | 1.47 | NA   | 0    |
| Slc7a8   | 0.55 | 1.97 | 3.23 | 0    | 1.68 |
| Slc7a9   | 1.23 | 0    | 3.12 | 1.64 | 0    |
| Slc8a1   | 0.69 | 0.27 | 0.12 | 0    | 0.72 |
| Slc8a2   | 0.71 | 1.36 | 0    | 0.46 | 3.27 |
| Slc8a3   | 0    | NA   | 0.05 | 0.83 | NA   |
| Slc9a1   | 0.13 | 1.76 | 1.98 | 1.28 | 1.07 |
| Slc9a2   | 0.71 | 3.04 | 1.02 | 0.94 | 0    |
| Slc9a3   | 0    | 2.05 | 0    | 1.18 | 0    |
| Slc9a3r1 | 0.78 | 2.76 | 0.85 | 0.43 | 2.68 |
| Slc9a3r2 | 0.47 | 1.63 | 6.43 | 2.04 | 0    |
| Slc9a4   | 0    | NA   | NA   | 1.95 | NA   |
| Slc9a5   | NA   | 1.71 | 0.94 | 2.44 | 1.18 |
| Slc9a6   | 0.16 | 1.4  | 1.89 | 0    | 0    |
| Slc9a7   | 0    | NA   | NA   | 0    | NA   |
| Slc9a8   | 0.8  | 1.29 | 0.56 | 0    | 0    |
| Slc9a9   | 0    | NA   | 3.06 | 0.73 | 0    |
| Slc9b1   | NA   | NA   | 0.66 | 0.11 | NA   |
| Slc9b2   | NA   | NA   | 1.38 | 1.12 | NA   |

|         |      |      |      |       |      |
|---------|------|------|------|-------|------|
| Slc9c1  | NA   | NA   | NA   | 0     | NA   |
| Slco1c1 | 1    | 1.83 | 2.72 | 0     | 0    |
| Slco2a1 | 1.3  | 0.82 | 0.82 | 3.26  | 1.86 |
| Slco2b1 | 0.09 | 0.35 | 1.24 | 1.72  | 0    |
| Slco3a1 | 0.34 | 1.08 | 2.78 | 4.07  | 1.31 |
| Slco4a1 | 1.05 | 1.72 | 0.67 | 2.31  | 4.64 |
| Slco4c1 | 0    | 1.01 | 1.25 | 1.77  | 0    |
| Slco5a1 | 1.39 | 0.65 | 0    | 0     | 2    |
| Slfn5   | 0    | NA   | 1.54 | 15.65 | 0.83 |
| Slfn11  | NA   | NA   | 0.39 | 0.35  | NA   |
| Slirp   | NA   | 0    | 3.33 | NA    | NA   |
| Slit1   | 4.16 | 1.18 | 2.01 | NA    | 2.29 |
| Slit2   | 0.7  | 1.36 | 1.15 | 4.14  | 2.72 |
| Slit3   | 1.1  | 0.54 | 0.63 | 0     | 0    |
| Slitrk1 | 0.61 | NA   | 2.32 | 0     | 1.38 |
| Slitrk2 | 1.51 | NA   | 0.62 | 1.19  | 1.12 |
| Slitrk3 | 0.66 | 0.94 | 5.92 | 0.93  | 0    |
| Slitrk4 | 0.13 | NA   | 0.35 | 1.44  | 0.39 |
| Slitrk5 | 2.71 | 1.52 | 0.52 | 1.73  | 4    |
| Slitrk6 | 1.9  | NA   | 2.7  | 2.65  | 2.39 |
| Slk     | NA   | 0.06 | 1.99 | 0     | 2.01 |
| Slmap   | 0.31 | NA   | 0.65 | 1.83  | 1.22 |
| Slmo1   | NA   | 0    | 0.99 | 2.83  | 0    |
| Slmo2   | NA   | 1.66 | 2.1  | 0.1   | 8.41 |
| Sln     | 1    | 0.33 | 0    | 0.92  | 0    |
| Slpi    | 0.54 | 0    | 0.57 | 0.31  | 0    |
| Sltm    | NA   | 0.51 | 1.51 | 1.15  | 0    |
| Slu7    | NA   | NA   | 1.13 | 1.12  | 0.34 |
| Slurp1  | NA   | 1.72 | 2.08 | 0.56  | 0    |
| Slx4    | NA   | NA   | 4.21 | 1.12  | NA   |
| Slx4ip  | NA   | NA   | 1.4  | 0.28  | NA   |
| Smad1   | 0.51 | 1.98 | 3.68 | 1.53  | 1.43 |
| Smad2   | 0.89 | 0.43 | 2.27 | 0.58  | 5.98 |
| Smad3   | 1.58 | 0.64 | 0.65 | 0     | 0    |
| Smad4   | 0.83 | 0.82 | 2.08 | 1.4   | 2.11 |
| Smad5   | 0.65 | 0.66 | 1.19 | 1.52  | 4.23 |
| Smad6   | 0    | 1.32 | 1.92 | 1.61  | 2.09 |
| Smad7   | 0    | 0    | 1.26 | 2.19  | 0    |
| Smad9   | 0.4  | 1.53 | 0.27 | 0     | NA   |
| Smagp   | NA   | 0    | 4.78 | 2.06  | 1.53 |
| Smap1   | 1.87 | 0.65 | 1.62 | NA    | 0    |



|          |      |      |      |      |      |
|----------|------|------|------|------|------|
| Smap2    | NA   | NA   | 1.48 | 1.26 | 0    |
| Smarca1  | 1.55 | 0.99 | 2.59 | 0    | 0    |
| Smarca2  | 7.08 | 0    | 1.65 | 0    | 2.2  |
| Smarca4  | 0.14 | 1.23 | 0.91 | 0    | 0    |
| Smarca5  | 2.37 | 0.75 | 1.23 | 1.94 | 2.01 |
| Smarcad1 | 0.12 | NA   | 0.62 | 0.12 | 0    |
| Smarca11 | 0    | 0    | 1.37 | 0    | 2.63 |
| Smarcb1  | 0.81 | 0.97 | 0.49 | 0.57 | 0.56 |
| Smarcc1  | 0    | 0    | 1.74 | 5.18 | 0    |
| Smarcc2  | NA   | 0    | 1.57 | 0    | 0    |
| Smarcd1  | 0.82 | 0.78 | 0.68 | 0    | 0.76 |
| Smarcd2  | 0.35 | 0.05 | 0.49 | NA   | 3.89 |
| Smarcd3  | 1.14 | 1.09 | 1.1  | 1.81 | 0    |
| Smarce1  | 0.54 | 0    | 1.57 | 0.14 | 1.66 |
| Smc1a    | NA   | 0.95 | 0.4  | 0    | 1.61 |
| Smc1b    | NA   | NA   | 1.29 | 1.12 | NA   |
| Smc2     | NA   | 0.71 | 0.06 | 0    | 1.45 |
| Smc3     | NA   | 0.1  | 0.02 | 0.79 | 0    |
| Smc4     | NA   | 0.97 | 3.83 | 1.63 | 0    |
| Smc5     | NA   | 0.11 | 0    | 0.92 | 0    |
| Smc6     | NA   | 1.16 | 0.3  | 0.54 | 0    |
| Smchd1   | NA   | 1.41 | 0.07 | 0.04 | 0.56 |
| Smco2    | NA   | NA   | NA   | 1.75 | NA   |
| Smco3    | NA   | NA   | 1.8  | 0.25 | NA   |
| Smco4    | NA   | 1.19 | 1.74 | 3.21 | NA   |
| Smcp     | NA   | 1.19 | 0    | 0.63 | 2.14 |
| Smcr7    | NA   | NA   | 3.78 | 1.39 | 0    |
| Smcr7l   | NA   | 2.7  | 0.23 | 0.45 | 0    |
| Smcr8    | NA   | NA   | 1    | 0.66 | 2.73 |
| Smdt1    | NA   | NA   | 4    | 0    | NA   |
| Smek1    | NA   | 0    | 0.79 | 0.28 | 0    |
| Smek2    | NA   | 0.25 | 1.06 | 0.41 | 1.18 |
| Smg1     | NA   | 0.96 | 0.39 | 0    | 0.02 |
| Smg5     | NA   | 1.29 | 1.1  | 5.18 | 0    |
| Smg6     | NA   | 0.25 | 0.55 | 0    | 0    |
| Smg7     | NA   | 1.08 | 0.59 | 3.4  | 0    |
| Smg8     | NA   | 1.55 | 0.95 | 0.38 | NA   |
| Smg9     | NA   | 0    | 1.09 | 3.38 | NA   |
| Smim1    | NA   | NA   | 0    | NA   | NA   |
| Smim11   | NA   | NA   | 2.64 | 0.99 | NA   |
| Smim12   | NA   | NA   | 1.95 | 0    | NA   |

|         |      |      |      |      |      |
|---------|------|------|------|------|------|
| Smim13  | NA   | NA   | 1.29 | NA   | NA   |
| Smim14  | NA   | 2.53 | 0.98 | 0.34 | NA   |
| Smim15  | NA   | NA   | 2.96 | 1.34 | NA   |
| Smim19  | NA   | NA   | 0.92 | 1.16 | NA   |
| Smim20  | NA   | NA   | 0.71 | 2.18 | NA   |
| Smim3   | NA   | NA   | 2.17 | 1.36 | NA   |
| Smim4   | NA   | NA   | 2.93 | 0.62 | NA   |
| Smim5   | NA   | NA   | 0.68 | 3.17 | NA   |
| Smim6   | NA   | NA   | 0.46 | NA   | NA   |
| Smim7   | NA   | 1.16 | 1.1  | 0.46 | NA   |
| Smim8   | NA   | 0.64 | 1.91 | 1.18 | NA   |
| Smn1    | 0    | NA   | NA   | NA   | NA   |
| Smndc1  | NA   | 1.12 | 1.89 | 1.12 | 1.44 |
| Smo     | 0.85 | 1.71 | 1.7  | 0.84 | 1.42 |
| Smoc1   | 1.92 | NA   | 1.85 | 1.06 | 1.49 |
| Smoc2   | 0.26 | NA   | 1.37 | 0.62 | 1.75 |
| Smox    | 0    | 0.61 | 1.24 | 0.32 | 0    |
| Smpd1   | 0.28 | 0.79 | 0    | 4.49 | 0.01 |
| Smpd2   | 0.04 | 2.74 | 1.27 | 0    | 9.19 |
| Smpd3   | 0    | 0    | 0.77 | 3.24 | 0    |
| Smpd4   | NA   | NA   | NA   | 3.44 | NA   |
| Smpdl3a | 0    | 3.66 | 1.36 | 1.03 | 4.24 |
| Smpdl3b | 0.7  | 1.51 | 2.41 | 1.58 | 8.4  |
| Smpx    | 3.56 | 1.21 | 0.42 | 5.1  | 0    |
| Smr3a   | NA   | 1.03 | 0    | 1.33 | 0    |
| Sms     | NA   | 0    | 3.5  | NA   | 3.23 |
| Smtn    | 1    | 1.99 | 2.04 | 1.94 | 0    |
| Smtnl1  | NA   | NA   | 0.41 | NA   | 0    |
| Smtnl2  | NA   | NA   | 2.38 | 0.54 | 1    |
| Smu1    | 0    | 0.82 | 1.17 | 0.85 | 0.85 |
| Smug1   | 0    | 4.09 | 1.62 | 0    | 0    |
| Smurf1  | 0.28 | 0.86 | 3.02 | 0.81 | 0    |
| Smurf2  | 0.34 | 1.53 | 1.16 | 0.02 | 3.19 |
| Smyd1   | 0.19 | NA   | 0    | 2.68 | 1.49 |
| Smyd2   | 0    | 2.57 | 1.53 | 0.7  | 1.66 |
| Smyd3   | 0.76 | 0    | 1.75 | 0.54 | 2.13 |
| Smyd4   | NA   | NA   | 0.88 | 4.16 | 1.12 |
| Smyd5   | 0    | 0    | 0.03 | 1.2  | 0.83 |
| Snag1   | 2.14 | NA   | NA   | NA   | NA   |
| Snai1   | 0.87 | 0.77 | 1.01 | 0.33 | 0.24 |
| Snai2   | 0.94 | 0.07 | 0.02 | 1.41 | 1.1  |

|          |      |      |      |      |      |
|----------|------|------|------|------|------|
| Snai3    | 0    | NA   | 0    | 1.02 | NA   |
| Snap23   | 0    | 0.74 | 1.93 | 0.97 | 0    |
| Snap25   | 0    | 0.8  | 1.1  | 1.2  | 0    |
| Snap29   | 0.12 | 2.12 | 0.72 | 0.74 | 0    |
| Snap47   | NA   | NA   | 3.12 | NA   | 0    |
| Snap91   | 0.27 | 1.28 | 1.25 | 1.22 | 0    |
| Snapap   | 0.17 | NA   | NA   | NA   | NA   |
| Snapc1   | 1.08 | 0.07 | 3.49 | 0.73 | 2.36 |
| Snapc2   | 0    | 1.95 | 0.85 | 2.41 | 1.27 |
| Snapc3   | 0    | 0.61 | 0.97 | 0    | 2.66 |
| Snapc4   | 0.86 | 0    | 1.63 | 1.53 | 0.03 |
| Snapc5   | 0.14 | 0.29 | 0.76 | 2.67 | 0    |
| Snapin   | NA   | NA   | 1.01 | NA   | 0.75 |
| Snca     | 0    | 0.94 | 1.11 | 2.83 | 1.29 |
| Sncaip   | 0    | 1.44 | 1.41 | 4.07 | 0    |
| Sncb     | 0    | 1.78 | 1.43 | 0.76 | 2    |
| Sncg     | 1.46 | 1.36 | 0.19 | 4.24 | 2.37 |
| Snd1     | NA   | 1.94 | 0    | 0    | 2.44 |
| Sned1    | 0.57 | 1.28 | 1.37 | 1.22 | 4.2  |
| Snf1lk   | 0    | NA   | NA   | NA   | NA   |
| Snf8     | NA   | 0.1  | 0.1  | 0    | 2.54 |
| Snhg1    | NA   | NA   | 2.39 | NA   | 2.56 |
| Snhg10   | NA   | NA   | 0.76 | NA   | 0.35 |
| Snhg11   | NA   | NA   | 1.62 | NA   | 0    |
| Snhg12   | NA   | NA   | 0.17 | NA   | 0    |
| Snhg3    | NA   | 0.89 | 3.03 | NA   | 2.22 |
| Snhg4    | NA   | NA   | 0    | NA   | NA   |
| Snhg5    | NA   | NA   | 0.59 | NA   | NA   |
| Snhg6    | NA   | NA   | 2.96 | NA   | 4.84 |
| Snhg7    | NA   | NA   | 0.76 | NA   | 0    |
| Snhg8    | NA   | NA   | 4.36 | NA   | 0    |
| Snip1    | 1.02 | 1.14 | 0.9  | 1.15 | 4.87 |
| Snn      | 0.23 | 0.86 | 0.96 | NA   | 0    |
| Snora16a | NA   | NA   | NA   | 0.44 | NA   |
| Snora19  | NA   | NA   | NA   | 0.52 | NA   |
| Snora20  | NA   | NA   | NA   | 0    | NA   |
| Snora21  | NA   | NA   | NA   | 0.04 | NA   |
| Snora23  | NA   | NA   | NA   | 0.29 | NA   |
| Snora24  | NA   | NA   | NA   | 0.13 | NA   |
| Snora28  | NA   | NA   | NA   | 4.7  | NA   |
| Snora2b  | NA   | NA   | NA   | 0    | NA   |

|          |    |    |      |      |      |
|----------|----|----|------|------|------|
| Snora3   | NA | NA | NA   | 0    | NA   |
| Snora30  | NA | NA | NA   | 2.11 | NA   |
| Snora31  | NA | NA | NA   | 0    | NA   |
| Snora33  | NA | NA | NA   | 0.13 | NA   |
| Snora41  | NA | NA | NA   | 0    | NA   |
| Snora44  | NA | NA | NA   | 0.79 | NA   |
| Snora52  | NA | NA | NA   | 0.21 | NA   |
| Snora5c  | NA | NA | NA   | 2.56 | NA   |
| Snora61  | NA | NA | NA   | 1.16 | NA   |
| Snora62  | NA | NA | NA   | 0.3  | NA   |
| Snora69  | NA | NA | NA   | 1.25 | NA   |
| Snora70  | NA | NA | NA   | 0.69 | NA   |
| Snora74a | NA | NA | NA   | 0.78 | NA   |
| Snora75  | NA | NA | NA   | 0.52 | NA   |
| Snora7a  | NA | NA | NA   | 0.07 | NA   |
| Snord104 | NA | NA | 1.47 | 0.64 | 1.78 |
| Snord123 | NA | NA | NA   | NA   | 4.01 |
| Snord14e | NA | NA | NA   | 0.71 | NA   |
| Snord15a | NA | NA | NA   | 0.82 | NA   |
| Snord15b | NA | NA | NA   | 0.71 | NA   |
| Snord1c  | NA | NA | NA   | 0.39 | NA   |
| Snord32a | NA | NA | NA   | 0.02 | NA   |
| Snord33  | NA | NA | NA   | 0.06 | NA   |
| Snord34  | NA | NA | NA   | 1.55 | NA   |
| Snord35a | NA | NA | NA   | 0    | NA   |
| Snord37  | NA | NA | NA   | 3.31 | NA   |
| Snord38a | NA | NA | NA   | 2.07 | NA   |
| Snord42b | NA | NA | NA   | 0    | NA   |
| Snord49a | NA | NA | NA   | 4.39 | NA   |
| Snord49b | NA | NA | NA   | 0.79 | NA   |
| Snord52  | NA | NA | NA   | 2.26 | NA   |
| Snord53  | NA | NA | NA   | 0.74 | NA   |
| Snord55  | NA | NA | NA   | 0.32 | NA   |
| Snord57  | NA | NA | NA   | 0    | NA   |
| Snord58b | NA | NA | NA   | 0    | NA   |
| Snord61  | NA | NA | NA   | 0.82 | NA   |
| Snord68  | NA | NA | NA   | 0.53 | NA   |
| Snord7   | NA | NA | NA   | 3.11 | NA   |
| Snord73a | NA | NA | NA   | 3.82 | NA   |
| Snord8   | NA | NA | NA   | 0.52 | NA   |
| Snord82  | NA | NA | NA   | 0    | NA   |

|          |      |      |      |      |      |
|----------|------|------|------|------|------|
| Snord89  | NA   | NA   | 0.57 | NA   | 0    |
| Snord95  | NA   | NA   | NA   | 0.64 | NA   |
| Snord96a | NA   | NA   | NA   | 2.33 | NA   |
| Snph     | 0.3  | 0    | 0.41 | NA   | 0.79 |
| Snrk     | 1.12 | 0.47 | 2.04 | 0.66 | 0    |
| Snrnp200 | NA   | 0.11 | 1.03 | 0    | 0    |
| Snrnp25  | NA   | 1.91 | 1.86 | 0.72 | 0    |
| Snrnp27  | NA   | 0.01 | 2.29 | 1.75 | 0    |
| Snrnp35  | NA   | 1.11 | 0.97 | 3.27 | 1.78 |
| Snrnp40  | NA   | 2.1  | 0    | 0.74 | 4.38 |
| Snrnp48  | NA   | NA   | 0.81 | 0.87 | 2.18 |
| Snrnp70  | NA   | 0.17 | 1.08 | 2.84 | 1.2  |
| Snrp70   | 0.62 | NA   | NA   | NA   | NA   |
| Snrpa    | 0.32 | 2.71 | 0.17 | 0    | 1.91 |
| Snrpa1   | 0    | 1.43 | 1.07 | 1.84 | 3.06 |
| Snrpb    | 0.6  | 3.01 | 0.19 | 0.76 | 0    |
| Snrpb2   | 0.65 | 0.33 | 2.12 | 1.3  | 2.58 |
| Snrpc    | NA   | 0.87 | 1.04 | 0    | 2.14 |
| Snrpd1   | 0.25 | 0.25 | 2.26 | 1.18 | 1.47 |
| Snrpd2   | 0.21 | 0.17 | 2.24 | NA   | 0    |
| Snrpd3   | 0.25 | 0.45 | 0.38 | NA   | 1.47 |
| Snrpe    | 0.74 | 1.05 | 0.07 | 1.37 | 0    |
| Snrpf    | 0.24 | 2.01 | 0.24 | 3.69 | 0    |
| Snrpg    | 0    | 1.19 | 1.04 | 0    | 0    |
| Snrpn    | 0    | 1.38 | 2.11 | NA   | 1.78 |
| Snta1    | 0.67 | 0.97 | 3.53 | 2.43 | 1.96 |
| Sntb1    | 0.88 | 1.52 | 1.32 | 1.17 | 2.62 |
| Sntb2    | 0    | 0.86 | 1    | 0    | 0    |
| Sntg1    | 0.8  | 1.43 | 0.21 | 0    | 0    |
| Sntg2    | 1.09 | 1.77 | 0.87 | 0    | 0    |
| Sntn     | NA   | NA   | NA   | 0    | NA   |
| Snupn    | NA   | 0.1  | 1    | 1.28 | 0    |
| Snurf    | NA   | 1.52 | 0.41 | NA   | NA   |
| Snw1     | NA   | 0.82 | 0.46 | 1.12 | 0.49 |
| Snx1     | 0    | 0.7  | 0.79 | 1.07 | 1.34 |
| Snx10    | 0    | 0.71 | 2.17 | 0.77 | 0    |
| Snx11    | 0.76 | 2.22 | 2.62 | 0    | 0    |
| Snx12    | 0    | NA   | 0.94 | 1.1  | 1.26 |
| Snx13    | 0.27 | 0    | 0.99 | 0.18 | 0    |
| Snx14    | 0.54 | NA   | 0.71 | 0    | 5.61 |
| Snx15    | 0    | 2.04 | 1.51 | 0.92 | 1.23 |

|        |      |      |      |      |      |
|--------|------|------|------|------|------|
| Snx16  | 0.49 | 0.45 | 1.41 | 0.28 | 0    |
| Snx17  | 0.1  | 1.51 | 2.21 | 0.66 | 0    |
| Snx18  | NA   | NA   | 1.97 | 1.12 | 3.63 |
| Snx19  | 0    | 0.68 | 0.06 | 0    | 0.57 |
| Snx2   | 0    | 2.39 | 1.7  | 0.97 | 0    |
| Snx20  | NA   | NA   | 0.56 | 0.66 | 0.98 |
| Snx21  | NA   | NA   | 1.57 | NA   | 2.04 |
| Snx22  | NA   | NA   | 0.02 | 0.82 | 4.72 |
| Snx24  | 0    | 0.97 | 2.26 | 0.34 | 0    |
| Snx25  | 0.93 | NA   | 0.58 | 0.94 | 0.5  |
| Snx26  | 1.33 | NA   | NA   | NA   | NA   |
| Snx27  | 0.28 | 0    | 0.77 | 0.87 | 1.33 |
| Snx29  | NA   | 1.41 | 0.36 | 0    | 1.6  |
| Snx3   | 0    | 2.38 | 1.51 | 0    | 3.33 |
| Snx30  | NA   | NA   | 0.68 | 0    | 0    |
| Snx31  | NA   | NA   | 1.01 | 0.52 | 2.63 |
| Snx32  | NA   | NA   | 2.1  | 2.12 | 1.04 |
| Snx33  | NA   | NA   | 0.11 | 0    | 0    |
| Snx4   | 0    | 1.29 | 1    | 0.42 | 1.7  |
| Snx5   | 0    | 0    | 0.76 | 0.98 | 0    |
| Snx6   | 0.74 | 0    | 0.55 | 0.7  | 0.37 |
| Snx7   | 0.43 | 0    | 0.85 | 1.53 | 1.97 |
| Snx8   | 0.05 | NA   | 2.54 | 2.41 | 0    |
| Snx9   | 1.2  | NA   | 2.33 | 5.71 | 0    |
| Soat1  | 0.01 | 2.48 | 2.15 | 1.24 | 0.78 |
| Soat2  | 0    | 1.28 | 4.19 | 1.99 | 4.97 |
| Sobp   | NA   | 1.62 | 0.9  | 0    | 4.56 |
| Socs1  | 0    | 0.91 | 1.94 | 1.39 | 0    |
| Socs2  | 0.64 | 1.84 | 2.4  | 0.7  | 1.48 |
| Socs3  | 0.09 | 0.46 | 3.9  | 0    | 0    |
| Socs4  | 0.81 | NA   | 1.53 | 1.31 | 0    |
| Socs5  | 0.5  | 1.6  | 2.09 | 3.66 | 0    |
| Socs6  | 0    | 0.64 | 2.67 | 2.42 | 2.2  |
| Socs7  | 1.33 | 1.21 | 0.44 | 0.99 | 0.93 |
| Sod1   | 0    | 1.27 | 1.96 | 1.46 | 0.01 |
| Sod2   | 0.07 | 0.1  | 1.63 | 0.94 | 0    |
| Sod3   | 0    | 0.21 | 2.08 | 8.24 | 0    |
| Soga1  | NA   | 1.88 | 1.53 | 1.86 | NA   |
| Soga2  | NA   | 0.99 | 0.5  | 0.86 | NA   |
| Soga3  | NA   | NA   | 0.04 | 0.45 | NA   |
| Sohlh1 | NA   | NA   | 0.91 | 1.82 | NA   |

|         |      |      |      |      |      |
|---------|------|------|------|------|------|
| Sohlh2  | NA   | 0.88 | 1.02 | 0    | 0    |
| Solh    | 0.38 | 0    | 0.36 | 0.86 | 0    |
| Son     | 0.4  | 1.24 | 0.74 | 1.36 | 0.8  |
| Sorbs1  | 0.68 | 1.13 | 1.34 | 0    | 1.03 |
| Sorbs2  | NA   | 1.26 | 0.57 | 0.47 | 2.64 |
| Sorbs3  | NA   | 0    | 3.73 | 0.51 | 1.95 |
| Sorcs1  | 0.19 | NA   | 0.01 | 3.31 | 3.04 |
| Sorcs2  | 1.6  | NA   | 1.32 | 0    | 0    |
| Sorcs3  | 0.15 | 1.55 | 1.31 | 1.08 | 0    |
| Sord    | NA   | 0    | 2.55 | 0.56 | 0    |
| Sorl1   | 1.66 | 1.01 | 0.99 | 0.07 | 2.57 |
| Sort1   | 0    | 1.57 | 0.8  | 0    | 0    |
| Sos1    | 0.03 | 0.43 | 0.77 | 0.88 | 1.03 |
| Sos2    | 0    | 0    | 3.2  | 2.27 | 0    |
| Sost    | 0.88 | NA   | 1.07 | 2.07 | 0    |
| Sostdc1 | 0.71 | 0.46 | 1.31 | 0    | 0.81 |
| Sowaha  | NA   | NA   | 0.57 | 2.15 | NA   |
| Sowahb  | NA   | NA   | NA   | 0.69 | NA   |
| Sowahe  | NA   | 0    | 2.25 | 1.05 | NA   |
| Sowahd  | NA   | NA   | NA   | 0.67 | NA   |
| Sox1    | 2.03 | 0.25 | 0    | 0.89 | 0    |
| Sox10   | 2.09 | 0.55 | 0.77 | 0.2  | 1.38 |
| Sox11   | 0.48 | 1.05 | 1.23 | 1.2  | 2.11 |
| Sox12   | 0.52 | 0    | 0.45 | 1.42 | 0.24 |
| Sox13   | 3.4  | 0    | 0.39 | 1.63 | 1.37 |
| Sox14   | 0    | 2.08 | 0    | 0.28 | 1.59 |
| Sox15   | 0.96 | 2.23 | 0.21 | NA   | 0    |
| Sox17   | 0.16 | 0.24 | 0.12 | 0.24 | 1.93 |
| Sox18   | 1.63 | 1.6  | 1.87 | 0.85 | 0.9  |
| Sox2    | 0    | 0.22 | 0.05 | 0    | 0    |
| Sox21   | 1.24 | 1.18 | 1    | 1.66 | 1.86 |
| Sox2ot  | NA   | NA   | NA   | NA   | 0.94 |
| Sox3    | 0    | 0.93 | 0.34 | 1.14 | 0    |
| Sox30   | 0    | 1.85 | 2.82 | 2.31 | 0    |
| Sox4    | 0.6  | 0.5  | 0.02 | 1.74 | 0.63 |
| Sox5    | 0.24 | 0.2  | 0.22 | 2.49 | 0    |
| Sox6    | 0.71 | NA   | 0.48 | 1.2  | 0.59 |
| Sox7    | 0.47 | NA   | 0.47 | 2.48 | 0.12 |
| Sox8    | 1.79 | NA   | 4    | 1.54 | 1.7  |
| Sox9    | 4.2  | 1    | 0.74 | 0.83 | 0    |
| Sp1     | 0    | 0.19 | 3.18 | 1.76 | 1.45 |

|         |      |      |      |      |      |
|---------|------|------|------|------|------|
| Sp100   | 0.06 | 1.97 | 0.24 | 0    | 0    |
| Sp110   | NA   | 0    | 1.1  | 0    | 0    |
| Sp140   | NA   | NA   | NA   | 0.95 | NA   |
| Sp2     | 0.93 | 0.84 | 0.76 | 1.38 | 7.3  |
| Sp3     | 0    | 1.21 | 2.67 | 0    | 1.04 |
| Sp4     | 0    | 0.18 | 0.83 | 1.58 | 0.91 |
| Sp5     | 2.36 | NA   | 1.9  | 4.11 | 0    |
| Sp6     | 0.07 | NA   | 1.36 | 2.49 | 0.6  |
| Sp7     | 0    | NA   | 1.53 | 1.47 | NA   |
| Sp8     | 0    | NA   | 0.89 | 1.96 | 3.89 |
| Sp9     | NA   | NA   | NA   | 1.62 | NA   |
| Spa17   | 0.65 | 1.54 | 0.95 | NA   | 0.02 |
| Spaca1  | NA   | 1.28 | 2.11 | 0    | 0    |
| Spaca3  | 0    | NA   | 0.05 | 1.15 | 0.26 |
| Spaca4  | NA   | NA   | 1.5  | 0.67 | 3.28 |
| Spaca7  | NA   | NA   | 1.21 | 1.08 | NA   |
| Spag1   | 0    | 2.9  | 1.24 | 1.25 | 1.68 |
| Spag11  | 1.54 | NA   | NA   | NA   | NA   |
| Spag11a | NA   | NA   | NA   | 0.5  | NA   |
| Spag16  | 0    | 3.15 | 0.52 | 0.87 | 0.52 |
| Spag17  | NA   | NA   | 0.93 | 0.03 | 0    |
| Spag4   | 0.07 | 1.04 | 0    | 0.92 | 4.6  |
| Spag4l  | 4.23 | NA   | NA   | NA   | NA   |
| Spag5   | 0    | 0.74 | 2.58 | NA   | 5.13 |
| Spag6   | 0.03 | 0.76 | 2.17 | 1.06 | 7.71 |
| Spag7   | 0.51 | 0.06 | 0.67 | 0    | 6.56 |
| Spag8   | NA   | 2.15 | 1.46 | 2.19 | 0.05 |
| Spag9   | 0.7  | 0.57 | 0.42 | 0    | 0.46 |
| Spam1   | 0.12 | 1.33 | 1.26 | 0.77 | 2.4  |
| Sparc   | 1.84 | 0    | 0    | 2.42 | 1.21 |
| Sparc11 | 0.09 | 1.44 | 1.11 | 0.36 | 0    |
| Spast   | NA   | 1.86 | 1.43 | 0.7  | 1.52 |
| Spata1  | 3.23 | NA   | NA   | NA   | 0    |
| Spata13 | 0.07 | NA   | 1.28 | 7.73 | NA   |
| Spata16 | NA   | NA   | 1.21 | 0    | 0    |
| Spata17 | NA   | NA   | 0.31 | 0    | 0.85 |
| Spata18 | NA   | NA   | 1.16 | 1.13 | 0.56 |
| Spata19 | NA   | NA   | 0.74 | 2.52 | NA   |
| Spata2  | 5.07 | 0.67 | 0.68 | 1.5  | 0    |
| Spata20 | NA   | NA   | NA   | 0.57 | NA   |
| Spata21 | NA   | NA   | 0.79 | 0.6  | NA   |



|          |      |      |      |      |      |
|----------|------|------|------|------|------|
| Spata22  | NA   | NA   | NA   | 0.87 | NA   |
| Spata24  | NA   | NA   | 2.88 | 0.11 | NA   |
| Spata25  | NA   | NA   | 1.18 | 1.72 | NA   |
| Spata21  | NA   | 3.96 | 0.17 | 0.71 | 0    |
| Spata3   | NA   | NA   | 0    | 1.51 | 2.12 |
| Spata4   | 2.53 | NA   | 2.25 | 0.14 | 3.27 |
| Spata5   | 2.28 | NA   | 1.44 | 1.61 | 0.7  |
| Spata511 | 2.8  | 0.89 | 0.08 | NA   | 0.24 |
| Spata6   | 0.25 | 1.35 | 1.25 | 0.73 | 0.58 |
| Spata7   | NA   | 2.98 | 0    | 0.73 | 1.36 |
| Spata9   | NA   | NA   | 1.61 | 2.23 | 1.29 |
| Spatc1   | NA   | NA   | 1.16 | 1.48 | 0    |
| Spatc11  | NA   | NA   | 1.56 | 1.41 | NA   |
| Spats1   | 1.9  | NA   | NA   | 3.94 | 0    |
| Spats2   | 0    | 0.37 | 0.96 | 0.82 | 0    |
| Spats21  | NA   | 0.59 | 1.1  | 0.82 | 0    |
| Spc24    | NA   | NA   | 3.46 | 2.23 | 2.24 |
| Spc25    | NA   | 1.27 | 1.45 | 0.81 | 2.58 |
| Spcs1    | NA   | 0.62 | 1.05 | NA   | 0    |
| Spcs2    | NA   | NA   | 4.62 | 1.25 | 1.27 |
| Spcs3    | NA   | 0.83 | 2.36 | 0.57 | 0    |
| Spdef    | 9.81 | 1.74 | 1.49 | 0.02 | 0    |
| Spdl1    | NA   | 1.65 | 2.22 | 1.44 | NA   |
| Spdya    | NA   | NA   | 1.32 | 8.76 | 0.71 |
| Specc1   | NA   | NA   | 1.12 | 9.57 | NA   |
| Specc11  | NA   | 0.81 | 1.33 | 1.22 | NA   |
| Spef1    | NA   | 1.55 | 0.68 | 1.96 | 1.58 |
| Spef2    | NA   | NA   | 0.81 | 0.97 | 0    |
| Speg     | NA   | 1.06 | 0.51 | 0.51 | 1.66 |
| Spem1    | NA   | NA   | 3.18 | 2.38 | 6.29 |
| Spem     | NA   | 1.37 | 1.45 | 4.81 | 0    |
| Spert    | NA   | NA   | 1.44 | 4.95 | NA   |
| Spesp1   | 0.33 | NA   | 0.38 | 3.2  | 0    |
| Spg11    | NA   | 0.29 | 1.16 | 0    | 0.75 |
| Spg20    | 0    | 0.09 | 0.62 | 0.43 | 0    |
| Spg21    | 0.32 | 1.93 | 0.9  | 1.91 | 0    |
| Spg3a    | 2.75 | NA   | NA   | NA   | NA   |
| Spg7     | 0.96 | 0    | 0.81 | 0    | 4.09 |
| Sphk1    | 0    | 1.45 | 1.78 | 1.11 | 0    |
| Sphk2    | 0.14 | 1.21 | 0.6  | 0    | 0.82 |
| Sphkap   | NA   | NA   | 0    | 1.18 | 2.07 |

|         |      |      |      |      |      |
|---------|------|------|------|------|------|
| Spib    | 0.25 | 0.05 | 0.97 | 1.46 | 0    |
| Spic    | 1.92 | NA   | 4.28 | 7.12 | NA   |
| Spice1  | NA   | 2.06 | 0    | 0.34 | NA   |
| Spin1   | NA   | 1.1  | 2.47 | 0.39 | 2.48 |
| Spin4   | NA   | NA   | 1.59 | 2.06 | 0    |
| Spink14 | NA   | NA   | NA   | 1.32 | NA   |
| Spink2  | 0    | 0.75 | 0.2  | 1.45 | 0    |
| Spink4  | 0    | 3.42 | 0.04 | 2.64 | 2.17 |
| Spink5  | 0    | 1.42 | 0.13 | 1.18 | 0    |
| Spink6  | NA   | NA   | NA   | 0.45 | NA   |
| Spink7  | NA   | NA   | NA   | 0.6  | NA   |
| Spinlw1 | 0.44 | NA   | NA   | NA   | 4.2  |
| Spint1  | 0.78 | 2.4  | 0.15 | 2.77 | 0.87 |
| Spint2  | 1.21 | 2.32 | 0    | 0.53 | 0    |
| Spint3  | NA   | NA   | NA   | 2.64 | NA   |
| Spint4  | NA   | NA   | NA   | 0.15 | NA   |
| Spire1  | 0    | NA   | 3.09 | 5.35 | 0.17 |
| Spire2  | 0.5  | NA   | 0.67 | 3.99 | 0.31 |
| Spn     | 0.75 | 0.2  | 2.45 | 0.72 | 1.39 |
| Spns1   | NA   | 0    | 2.47 | 0.99 | 0    |
| Spns2   | NA   | NA   | 0.06 | 1.56 | 0.94 |
| Spns3   | NA   | NA   | 0.22 | 0.33 | 0    |
| Spo11   | 3.41 | 2.36 | 0.99 | 0.54 | 2.57 |
| Spocd1  | NA   | NA   | NA   | 0.77 | NA   |
| Spock1  | 0    | 0.5  | 0.61 | 1.39 | 4.41 |
| Spock2  | 0.42 | 1.74 | 1.85 | 4.53 | 0    |
| Spock3  | NA   | 0.02 | 0    | 2.78 | 0    |
| Spon1   | 4.38 | 1.12 | 0.05 | 0.26 | 0    |
| Spon2   | 0    | 2.73 | 0.8  | 0.37 | 1.46 |
| Spop    | 2.63 | 1.01 | 0.52 | 0.05 | 0    |
| Spopl   | NA   | NA   | 0.88 | 0.7  | 0    |
| Spp1    | 0.81 | 4.6  | 3.11 | 0.56 | 0    |
| Spp2    | 2.3  | 1.67 | 0.49 | 0.8  | 0.84 |
| Sppl2a  | NA   | NA   | 1.89 | 0    | NA   |
| Sppl2b  | NA   | 0.12 | 0.05 | 2.21 | NA   |
| Sppl2c  | NA   | NA   | NA   | 1.25 | NA   |
| Sppl3   | 0    | NA   | 0    | 0.82 | NA   |
| Spr     | 0.14 | 2.45 | 1.39 | 1.43 | 2.77 |
| Spred1  | 0    | NA   | 2.05 | 1.16 | 0.07 |
| Spred2  | 0.54 | 0.89 | 0.93 | 2.71 | 2.22 |
| Spred3  | NA   | NA   | 2.63 | 0.8  | NA   |

|         |      |      |      |      |      |
|---------|------|------|------|------|------|
| Sprn    | 0.24 | NA   | 2.35 | 2.36 | 0    |
| Sprr1a  | 0.19 | 0.35 | 0    | 2.64 | 4.69 |
| Sprr1b  | 9.89 | 0.49 | 0    | 1.25 | 0    |
| Sprr2a  | 6    | NA   | NA   | NA   | NA   |
| Sprr2b  | 0    | NA   | NA   | 4.52 | NA   |
| Sprr2d  | 0    | NA   | NA   | 0.49 | NA   |
| Sprr2e  | 0.57 | NA   | NA   | 2.39 | NA   |
| Sprr2f  | 1.15 | NA   | NA   | 1.29 | NA   |
| Sprr2g  | 2.51 | NA   | NA   | 1.85 | NA   |
| Sprr3   | 5.8  | 0.11 | 0.91 | 0.55 | 0    |
| Sprr4   | 1.8  | NA   | NA   | 2.79 | NA   |
| Sprtn   | NA   | NA   | 1.48 | NA   | NA   |
| Spry1   | 0.65 | 1.75 | 2.25 | 3.23 | NA   |
| Spry2   | 0    | 0.9  | 1.58 | 2.08 | 0    |
| Spry3   | NA   | NA   | 1.98 | 2.18 | 3.18 |
| Spry4   | 0    | 0.72 | 1.58 | 2.32 | 1.12 |
| Spryd3  | NA   | NA   | 1.7  | 2.7  | 0.55 |
| Spryd4  | NA   | NA   | 0.26 | 3.23 | 1.47 |
| Spryd7  | NA   | 1.41 | 2.7  | 1.35 | NA   |
| Spsb1   | NA   | 0.94 | 0.98 | 0.75 | 0    |
| Spsb2   | NA   | NA   | 1.75 | 1.06 | 0    |
| Spsb3   | NA   | 2.44 | 2.32 | 0.55 | 0    |
| Spsb4   | NA   | NA   | 1.59 | 4.75 | 9.07 |
| Spta1   | NA   | 1.86 | 1.52 | 0.14 | NA   |
| Sptan1  | NA   | 0    | 0.65 | 0    | NA   |
| Sptb    | NA   | 1.44 | 0.36 | 1.8  | NA   |
| Sptbn1  | NA   | 0.39 | 1.81 | 0    | NA   |
| Sptbn2  | NA   | 2.61 | 0.47 | 0.7  | NA   |
| Sptbn4  | NA   | 2.21 | 1.4  | 2.76 | NA   |
| Sptlc1  | 0.29 | 0.22 | 0.36 | 0.48 | 1.15 |
| Sptlc2  | 0    | 0    | 0.32 | 0.83 | 0    |
| Sptlc3  | NA   | 0.57 | 1.92 | 1    | 0    |
| Sptssa  | NA   | 2.81 | 1.64 | 0.92 | NA   |
| Sptssb  | NA   | NA   | 0    | 2.46 | NA   |
| Spty2d1 | NA   | NA   | 1.1  | 0.52 | 0.83 |
| Spz1    | 1.24 | NA   | 0.88 | 2.37 | 0    |
| Sqle    | 0.32 | 0.55 | 3.11 | 0.12 | 1.99 |
| Sqrdl   | 0.5  | 0    | 1.62 | 2.09 | 0    |
| Sqstm1  | 1.36 | 1.2  | 1.38 | 0.28 | 0.5  |
| Sra1    | 0.71 | NA   | 2.8  | 2.46 | 1.54 |
| Srbd1   | NA   | 2.65 | 1.97 | 0.81 | 1.94 |

|          |      |      |      |      |      |
|----------|------|------|------|------|------|
| Src      | 0    | 0.58 | 1.87 | 1.22 | 1.88 |
| Srcap    | NA   | 0.24 | 2.2  | 0    | 0.08 |
| Srcin1   | NA   | NA   | 0    | 1.37 | NA   |
| Srcrb4d  | 0.22 | NA   | 1.88 | 1.11 | 1.02 |
| Srd5a1   | 0.98 | 2.19 | 0.35 | 1.49 | 0    |
| Srd5a2   | 0.88 | 3.05 | 1.98 | 0.83 | 0    |
| Srd5a21  | 0.6  | NA   | NA   | NA   | NA   |
| Srd5a212 | 2.22 | NA   | NA   | NA   | NA   |
| Srd5a3   | NA   | 0.6  | 1.05 | 0.16 | 0.56 |
| Srebf1   | 3.43 | 0    | 0.25 | 0    | 0.7  |
| Srebf2   | 2.69 | 0.27 | 2.54 | 0.93 | 0    |
| Srek1    | NA   | 0.28 | 1.03 | 0.53 | NA   |
| Srek1ip1 | NA   | 1.59 | 1.25 | 1.28 | NA   |
| Srf      | 0.35 | 1.06 | 2.88 | 1.81 | 0    |
| Srfbp1   | NA   | NA   | 1.27 | 0.35 | 1.99 |
| Srgap1   | 3.47 | NA   | 1.06 | 0    | 3.25 |
| Srgap2   | 0.14 | 0.22 | 1.1  | 1.42 | 1.66 |
| Srgap3   | NA   | 1    | 0.94 | 0    | 2    |
| Srgn     | NA   | 0.01 | 1.1  | 3.11 | 0    |
| Sri      | 0.41 | 0.02 | 0.21 | 0.81 | 3.31 |
| Srl      | NA   | NA   | 0.55 | 0.83 | 0.13 |
| Srm      | 0.28 | 2.35 | 2.17 | 0.45 | 0    |
| Srms     | 0    | NA   | 1.35 | 0.45 | 1.54 |
| Srp14    | NA   | 1.4  | 0.87 | 0.1  | 0    |
| Srp19    | 0.71 | 0    | 1.49 | 0.38 | 0    |
| Srp54    | 0.76 | NA   | NA   | NA   | NA   |
| Srp68    | 0    | NA   | 0.78 | 0.47 | 0    |
| Srp72    | 0    | 1.33 | 2.91 | 0.2  | 1.87 |
| Srp9     | 1.02 | 1.19 | 1.6  | 0.35 | 0    |
| Srpk1    | 0.22 | 3.77 | 2.41 | 0.89 | 0    |
| Srpk2    | 0.1  | 0.24 | 0.8  | NA   | 1.33 |
| Srpk3    | NA   | 1.82 | 2.45 | 0    | 1.3  |
| Srpr     | 1.79 | 1.59 | 1.18 | 0.08 | 0.23 |
| Srprb    | 0    | 0    | 0.23 | 0.85 | 0    |
| Srpx     | 0.12 | 1.71 | 3.07 | 6.47 | 2.43 |
| Srpx2    | 0.43 | 1.7  | 2.09 | 0.41 | 2.45 |
| Srr      | 0.06 | 0    | 0.52 | 0.31 | 0.75 |
| Srrd     | NA   | 0.95 | 1.05 | 0.9  | 0.18 |
| Srrm1    | 0.05 | 1.14 | 0.8  | 0    | 1.38 |
| Srrm2    | 0.07 | 0    | 0.95 | 4.83 | 1.33 |
| Srrm3    | NA   | NA   | 0    | 0.6  | NA   |

|        |      |      |      |      |      |
|--------|------|------|------|------|------|
| Srrm4  | NA   | NA   | 0    | 0.29 | NA   |
| Srrt   | NA   | 0.69 | 0.38 | 0    | 0.02 |
| Srsf1  | NA   | 0    | 0.59 | 0.95 | NA   |
| Srsf10 | NA   | 0.02 | 2.08 | 0.58 | NA   |
| Srsf11 | NA   | 0.3  | 1.43 | 0    | NA   |
| Srsf12 | NA   | NA   | 1.51 | 0.54 | NA   |
| Srsf2  | NA   | 1.3  | 1.06 | 0    | NA   |
| Srsf3  | NA   | 1.36 | 0.02 | 0.71 | NA   |
| Srsf4  | NA   | 1.21 | 2.37 | 0.64 | NA   |
| Srsf5  | NA   | 1.66 | 0.25 | NA   | NA   |
| Srsf6  | NA   | 0.15 | 1.71 | 0.92 | NA   |
| Srsf7  | NA   | 0    | 0.89 | 0.34 | NA   |
| Srsf9  | NA   | 2.34 | 2.13 | 1.74 | NA   |
| Srxn1  | NA   | NA   | 0.88 | 1.09 | 2.01 |
| Sry    | 3.42 | 1.03 | 0.05 | 0.14 | 0    |
| Ss18   | 0.27 | 0.64 | 1.51 | 6.46 | 0    |
| Ss18l1 | 0.46 | 0.37 | 0.78 | 0.89 | 0    |
| Ssb    | 0.29 | 1.25 | 1.68 | 0    | 0    |
| Ssbp1  | 0.67 | 0.76 | 0.58 | 0.23 | 0    |
| Ssbp2  | 0    | 0    | 0.93 | 1.37 | 0    |
| Ssbp3  | 0    | 0.04 | 0.64 | 1.28 | 0    |
| Ssbp4  | 0.58 | NA   | 4.98 | 0.19 | 1.73 |
| Ssc5d  | NA   | NA   | 0.9  | 0.8  | NA   |
| Ssfa2  | 1.85 | 0.13 | 1.17 | 1.62 | 0    |
| Ssh1   | 0    | 2.22 | 0.8  | 0    | 0    |
| Ssh2   | 0    | NA   | 2.31 | 0.96 | 0    |
| Ssh3   | 0.82 | 1.23 | 0.81 | 2.73 | 1.02 |
| Ssmem1 | NA   | NA   | 1.52 | 3.37 | NA   |
| Ssna1  | NA   | 1.93 | 1.89 | 1.89 | 0    |
| Sspn   | 2.26 | 0.07 | 0    | 2.07 | 0.51 |
| Sspo   | NA   | NA   | 1.1  | 1.98 | 0    |
| Ssr1   | 0    | 0.81 | 1.3  | 0.57 | 0    |
| Ssr2   | 1.58 | 0    | 1.09 | 4.19 | 0.64 |
| Ssr3   | 0    | 1.41 | 1.68 | 0.87 | 0    |
| Ssr4   | 0.67 | 0.73 | 4.25 | 2.43 | 0    |
| Ssrp1  | 0.46 | 0    | 0.02 | 1.34 | 0    |
| Sssca1 | 0.95 | 1.54 | 0.48 | 4.38 | 1.78 |
| Sst    | 1.26 | 0.46 | 0    | 3.49 | 0    |
| Sstr1  | 1.54 | 2.28 | 0.61 | 2.46 | 0    |
| Sstr2  | 0    | 2.15 | 2.12 | 1.49 | 5.15 |
| Sstr3  | 0.52 | 2.91 | 2.23 | 0    | 0    |

|            |      |      |      |      |      |
|------------|------|------|------|------|------|
| Sstr4      | 0    | 1.09 | 0.5  | 1.7  | 1.39 |
| Sstr5      | NA   | 0    | 0.66 | 0.85 | 4.41 |
| Ssu72      | NA   | NA   | 0.62 | 0.51 | 1.41 |
| Ssx2ip     | 1.11 | 1.67 | 0.91 | 1.97 | 0.05 |
| Ssx9       | 0.36 | NA   | NA   | NA   | NA   |
| St13       | 0    | 1.41 | 0.19 | NA   | 2.68 |
| St14       | 1.17 | 1.59 | 2.24 | 1.09 | 0    |
| St18       | 0.25 | 0.48 | 1.48 | 3.58 | 1.58 |
| St3gal1    | NA   | 0.96 | 0.06 | 0.76 | 1.08 |
| St3gal2    | NA   | 2.78 | 0.87 | 2.17 | 3.37 |
| St3gal3    | NA   | NA   | 0.77 | 0.91 | 2.03 |
| St3gal4    | NA   | 0    | 0.39 | 2.41 | 0    |
| St3gal5    | NA   | 0.37 | 3.03 | 0.5  | 0    |
| St3gal6    | NA   | 0    | 0.75 | NA   | 1.76 |
| St5        | 0.29 | 1.47 | 2.2  | 0.94 | 1.73 |
| St6gal1    | 1.27 | 0.02 | 2.57 | 2.28 | 0    |
| St6gal2    | 0    | NA   | 0.53 | 1.59 | 0    |
| St6galnac1 | NA   | NA   | 0    | 0    | 3.05 |
| St6galnac2 | NA   | 0.76 | 1.07 | NA   | 0    |
| St6galnac3 | NA   | NA   | 0    | 3.06 | 2.81 |
| St6galnac4 | NA   | 1.86 | 0.88 | 2.18 | 0.63 |
| St6galnac5 | NA   | 1.71 | 0.76 | 0.4  | 0    |
| St6galnac6 | NA   | NA   | 1.4  | 0.24 | 4.59 |
| St7        | 0.79 | 0.21 | 1.94 | NA   | 0.51 |
| St7l       | 0    | 1.37 | 0.56 | 0.84 | 0.83 |
| St8sia1    | NA   | 0.17 | 1.84 | 0.38 | 1.12 |
| St8sia2    | NA   | 1.46 | 0.4  | 7.89 | 0    |
| St8sia3    | NA   | 0.85 | 0.95 | 3.83 | 1.78 |
| St8sia4    | NA   | 0.97 | 1.32 | 0.65 | 1.8  |
| St8sia5    | NA   | 1.78 | 0.17 | 2    | 0    |
| St8sia6    | NA   | NA   | NA   | 1.52 | NA   |
| Stab1      | 0.51 | 0.15 | 4.58 | 0.03 | 0    |
| Stab2      | 0.68 | 0.38 | 1.26 | 2.91 | 2.89 |
| Stac       | 0.96 | 3.49 | 1.01 | 0.71 | 2.62 |
| Stac2      | 1.24 | NA   | 1.01 | 2.34 | 0.64 |
| Stac3      | NA   | NA   | 1.72 | 0.3  | 1.72 |
| Stag1      | 0    | 1.34 | 0.68 | 0.28 | 0.23 |
| Stag2      | 1.61 | 2.68 | 0.56 | 0.2  | 0    |
| Stag3      | 0.73 | 0    | 2.56 | 3.23 | 3.77 |
| Stam       | 0.37 | 0.18 | 1.97 | 0.19 | 0    |
| Stam2      | 0.09 | 0    | 0.63 | 0.55 | 0    |

|          |      |      |      |      |      |
|----------|------|------|------|------|------|
| Stambp   | 0.78 | 1.41 | 1.4  | 1.38 | 0    |
| Stambp11 | NA   | 1.44 | 1.94 | 2.85 | 1.11 |
| Stap1    | NA   | 0.34 | 1.41 | 0    | NA   |
| Stap2    | NA   | 1.05 | 1.12 | 0.73 | 0    |
| Star     | 0    | 0.1  | 1.44 | 4.35 | 0.68 |
| Stard10  | 0.4  | NA   | 0.1  | 1.39 | 3.14 |
| Stard13  | 2.97 | 0.61 | 0.67 | 3.17 | 0    |
| Stard3   | 0.62 | 2.23 | 0.07 | 1    | 3.45 |
| Stard3nl | 0.43 | NA   | 3.95 | 0.84 | 2.24 |
| Stard4   | 1.25 | NA   | 0.41 | 1.26 | 0    |
| Stard5   | 0.3  | 0    | 0    | 0.45 | 2.24 |
| Stard6   | 0.19 | NA   | 1.69 | 1.26 | NA   |
| Stard7   | 0.88 | 1.67 | 0.8  | 1.17 | 3.61 |
| Stard8   | 0.95 | 1.41 | 1.1  | 0    | 5.37 |
| Stard9   | NA   | NA   | 1.43 | 0    | 1.63 |
| Stat1    | 0.41 | 0.61 | 1.97 | 0    | 0.18 |
| Stat2    | 0    | 0    | 3.98 | 1.02 | 0    |
| Stat3    | 0.3  | 2.94 | 2.11 | 0    | 0    |
| Stat4    | 1.81 | 0    | 1.89 | 3.19 | 2.32 |
| Stat5a   | 0.03 | 1.29 | 0.55 | 1.62 | 4.17 |
| Stat5b   | 0    | 0.67 | 0.43 | 1.36 | 1.8  |
| Stat6    | 1    | 2.48 | 0.03 | 1.24 | 4.46 |
| Statip1  | 0    | NA   | NA   | NA   | NA   |
| Stau1    | 0.33 | 0.14 | 1.33 | 1.6  | 0    |
| Stau2    | 0    | 1.46 | 1.5  | 2.67 | 0    |
| Stbd1    | NA   | NA   | 3.15 | 0.19 | 0.59 |
| Stc1     | 0    | 1.17 | 1.23 | 0.22 | 1.94 |
| Stc2     | 0    | 0.86 | 0.18 | 0    | 2.51 |
| Stch     | 0.74 | NA   | NA   | NA   | NA   |
| Steap1   | NA   | 1.08 | 0.01 | 0.39 | 2.13 |
| Steap2   | 3.8  | NA   | 1.04 | 1.54 | 0.18 |
| Steap3   | NA   | 0    | 1.58 | 1.43 | 0    |
| Steap4   | NA   | 0.53 | 0.87 | 2.11 | 0    |
| Stil     | NA   | 0.63 | 4.63 | 0.38 | 0.05 |
| Stim1    | 0.59 | 0    | 2.55 | 8.78 | 0.34 |
| Stim2    | 0.67 | NA   | 0.81 | 1.23 | 4.19 |
| Stip1    | 0.38 | 1.3  | 0.27 | 0.47 | 0    |
| Stk10    | 1.45 | 0.1  | 0.54 | 1.9  | 0    |
| Stk11    | 0    | 0.95 | 1.13 | 1.23 | 2.13 |
| Stk11ip  | 1    | NA   | 1.66 | 0.44 | NA   |
| Stk16    | 1.04 | 0.2  | 0.6  | NA   | 0    |

|        |      |      |      |      |      |
|--------|------|------|------|------|------|
| Stk17b | 0.56 | 2.04 | 0.76 | 0    | 0    |
| Stk19  | 0.2  | 1.21 | 0.8  | 0    | 0    |
| Stk24  | 0.36 | 0.17 | 2.05 | 1.63 | 0.06 |
| Stk25  | 0.66 | 0    | 0.98 | NA   | 3.46 |
| Stk3   | 0.52 | 1.47 | 1.03 | 0.8  | 1.14 |
| Stk31  | 0.69 | NA   | 2.62 | 0    | 1.9  |
| Stk32a | 0.71 | NA   | 2.13 | 2.53 | NA   |
| Stk32b | 0.99 | 0    | 1.34 | 0    | 2.11 |
| Stk32c | 2.99 | NA   | 0.19 | 1.97 | 0    |
| Stk33  | 0.52 | NA   | 1.24 | 2.37 | 2.54 |
| Stk35  | 0    | NA   | 0.91 | 5.27 | 1.53 |
| Stk36  | NA   | NA   | 0.22 | 4.3  | 1.04 |
| Stk38  | 0.92 | 0.03 | 1.7  | 0.69 | 0.03 |
| Stk38l | 3.26 | 1.95 | 1.62 | 1.85 | 0    |
| Stk39  | 0    | 2.04 | 0.39 | 1.29 | 3.4  |
| Stk4   | 1.46 | 1.45 | 1.59 | 0.78 | 1.04 |
| Stk40  | NA   | NA   | 1.49 | 0.79 | 0    |
| Stmn1  | 0.36 | 0.35 | 2.98 | 2.4  | 1.33 |
| Stmn2  | 0    | 1    | 1.41 | 0.07 | 1.75 |
| Stmn3  | 0    | 2.47 | 2.28 | 2.09 | 3.23 |
| Stmn4  | 0.85 | 2.07 | 0.7  | 2.96 | 2.14 |
| Stom   | NA   | 3.65 | 1    | 2.37 | 3.94 |
| Stoml1 | 0.71 | 2.52 | 0.66 | 3.82 | 0    |
| Stoml2 | 0    | 2.91 | 0    | 0.65 | 4.9  |
| Stoml3 | 0    | NA   | 1.29 | 1.98 | NA   |
| Ston1  | NA   | 0.08 | 0.56 | NA   | 0    |
| Ston2  | NA   | NA   | 1.18 | 1.2  | 0    |
| Stox1  | NA   | NA   | 0.44 | 2.91 | 1.85 |
| Stox2  | NA   | NA   | 0.03 | 0.61 | 1.51 |
| Stpg1  | NA   | NA   | 0.51 | 0.97 | NA   |
| Stpg2  | NA   | NA   | NA   | 1.41 | NA   |
| Stra13 | 0.66 | 1.53 | 2.88 | 0    | 0    |
| Stra6  | 0.23 | 2.03 | 0.93 | 0.22 | 0    |
| Stra8  | 2.71 | NA   | NA   | 1.27 | NA   |
| Strada | NA   | 1.28 | 2.07 | 1.53 | 0    |
| Stradb | NA   | NA   | 0.21 | 0    | 0    |
| Strap  | 0.19 | 1.4  | 3.4  | 0.27 | 0    |
| Strbp  | 0    | NA   | 0.67 | 0    | 0.85 |
| Strc   | 0    | NA   | 1.05 | 2.53 | 0    |
| Strip1 | NA   | NA   | 0.81 | 0    | NA   |
| Strip2 | NA   | NA   | 0.83 | 0.8  | NA   |



|         |      |      |      |      |      |
|---------|------|------|------|------|------|
| Strn    | 0.14 | 0.73 | 0.83 | 2.38 | 0    |
| Strn3   | 1.48 | 0.47 | 0.77 | 0.36 | 1.12 |
| Strn4   | 2.6  | 0.32 | 0.08 | 0.98 | 0    |
| Sts     | 1.89 | 2.63 | 0.02 | 0.76 | 1.83 |
| Stt3a   | NA   | 1.88 | 2.96 | 0.11 | 0    |
| Stt3b   | NA   | NA   | 1.63 | 0    | 1    |
| Stub1   | 0.34 | 0    | 1.82 | NA   | 0    |
| Stx11   | 0    | 2.34 | 1.59 | 0.6  | 0    |
| Stx12   | 0.17 | 0.57 | 0.64 | 0.97 | 0    |
| Stx16   | 0.5  | 3.03 | 1.55 | 0    | 0.52 |
| Stx17   | 0.26 | 0.87 | 0.36 | 1.03 | 0.79 |
| Stx18   | 0.77 | 0.59 | 2.6  | 1.12 | 3.15 |
| Stx19   | NA   | NA   | 1.64 | 2.94 | NA   |
| Stx1a   | 0    | 0    | 0    | 0.32 | 0    |
| Stx1b   | NA   | NA   | 0.81 | 1.49 | 2.59 |
| Stx1b2  | 0.85 | NA   | NA   | NA   | NA   |
| Stx2    | NA   | 0.46 | 7.83 | 0.67 | 0    |
| Stx3    | 0    | 0.18 | 0.47 | 1.54 | 3.25 |
| Stx5a   | 0    | NA   | NA   | NA   | NA   |
| Stx6    | 1.28 | 0.59 | 1.56 | NA   | 2.18 |
| Stx7    | 0.35 | 0.1  | 1.05 | 0    | 1.59 |
| Stx8    | 0.49 | 0    | 1.31 | 1.21 | 0    |
| Stxbp1  | 0.06 | 1.7  | 0.52 | 0    | 0    |
| Stxbp2  | 0    | 0.22 | 0.63 | 1.53 | 0    |
| Stxbp3  | 1.09 | NA   | NA   | NA   | NA   |
| Stxbp4  | 0.78 | NA   | 0.38 | 0    | 0.77 |
| Stxbp5  | 1.81 | NA   | 1.39 | 0.56 | 1.65 |
| Stxbp5l | NA   | 2.3  | 0.2  | 1.81 | 0    |
| Stxbp6  | 3.57 | 0.82 | 0.35 | 1.61 | 3.51 |
| Styk1   | NA   | 1.14 | 2.85 | 0.18 | 1.94 |
| Styx    | NA   | NA   | 1.69 | 0.71 | 5.01 |
| Styx1l  | NA   | 1.07 | 2.24 | 1.41 | 0    |
| Sub1    | NA   | 1.03 | 0.88 | 0.88 | 1.83 |
| Sucla2  | 0    | 1.04 | 0.99 | 1.18 | 1.73 |
| Suclg1  | 0    | 4.67 | 1.55 | 0.84 | 0.7  |
| Suclg2  | 0    | 0    | 2.76 | 0.76 | 2.81 |
| Sucnr1  | 0.9  | NA   | 0.44 | 0.73 | 0    |
| Suco    | NA   | 0.95 | 0.87 | 0.66 | NA   |
| Suds3   | NA   | NA   | 1.59 | 1.62 | 0    |
| Sufu    | 0    | NA   | 0    | 2.05 | 0.51 |
| Sugp1   | NA   | 0    | 0.59 | 0.59 | NA   |

|         |      |      |       |      |      |
|---------|------|------|-------|------|------|
| Sugp2   | NA   | 0    | 1.35  | 1.41 | NA   |
| Sugt1   | 1.54 | NA   | 1.96  | 0.17 | 1.47 |
| Suhw2   | 3.85 | NA   | NA    | NA   | NA   |
| Suhw3   | 3.04 | NA   | NA    | NA   | NA   |
| Suhw4   | 0    | NA   | NA    | NA   | NA   |
| Sulf1   | 0.41 | 0.47 | 0.03  | 0.34 | 0    |
| Sulf2   | 0.66 | NA   | 1.73  | 1.83 | 0    |
| Sult1a1 | 0    | 2.13 | 2.28  | 1.77 | 0    |
| Sult1b1 | 1.7  | 2.25 | 3.23  | 0.16 | 0    |
| Sult1c1 | 0.97 | NA   | NA    | NA   | NA   |
| Sult1c2 | 2.97 | 0    | 0.95  | 3.52 | 3.27 |
| Sult1e1 | 0    | 1.29 | 0     | 3.09 | 1.24 |
| Sult2a1 | 2.56 | NA   | NA    | NA   | NA   |
| Sult2b1 | 0.5  | 0    | 0.71  | 1.33 | 1.43 |
| Sult4a1 | 2.07 | 0.01 | 0.22  | 0.54 | 2.78 |
| Sult6b1 | NA   | NA   | NA    | 0    | NA   |
| Sumf1   | 0.86 | NA   | 1.78  | 0    | 0    |
| Sumf2   | 0.08 | NA   | 0.91  | 0.01 | 9.04 |
| Sumo1   | 0.53 | 0    | 2.86  | 0.64 | 1.63 |
| Sumo2   | 1.71 | 1.64 | 1.33  | 1.05 | NA   |
| Sumo3   | 0    | 0.53 | 0.94  | 0    | 0    |
| Sun1    | NA   | 0    | 1.28  | 0    | NA   |
| Sun2    | NA   | 0    | 0.58  | 0    | NA   |
| Sun3    | NA   | NA   | 1.45  | NA   | NA   |
| Sun5    | NA   | NA   | 1.82  | 1.66 | NA   |
| Sunc1   | 2.59 | NA   | NA    | NA   | NA   |
| Suox    | 0.45 | 2.72 | 3.36  | 1.91 | 5.33 |
| Supt16h | 0.24 | NA   | NA    | NA   | 0    |
| Supt3h  | 0.83 | NA   | NA    | NA   | 1.6  |
| Supt5h  | 1.2  | NA   | NA    | NA   | 3.96 |
| Supt6h  | 0.6  | NA   | NA    | NA   | 0    |
| Supt7l  | NA   | 0    | 0.99  | 1.81 | 0    |
| Supv3l1 | 0.44 | 1.43 | 0.26  | 0.9  | 1.88 |
| Surb7   | 2.13 | NA   | NA    | NA   | NA   |
| Surf1   | 0.19 | 3.01 | 1.51  | 1.43 | 1.06 |
| Surf2   | 0.07 | 1.22 | 0     | 0.54 | 1.44 |
| Surf4   | 2.11 | NA   | 1.48  | 0    | 3.76 |
| Surf5   | 0.05 | NA   | NA    | NA   | NA   |
| Surf6   | 0    | NA   | 3.15  | 1.4  | 0    |
| Susd1   | NA   | NA   | 10.53 | 4.21 | 3.35 |
| Susd2   | 3.34 | NA   | 1.09  | 0    | 0    |

|          |      |      |      |      |      |
|----------|------|------|------|------|------|
| Susd3    | NA   | NA   | 1.77 | 1.46 | 0.71 |
| Susd4    | NA   | 0    | 1.39 | 1.23 | 0.84 |
| Susd5    | NA   | 0.95 | 1.3  | NA   | 1.86 |
| Suv39h1  | 0    | 0    | 1.3  | 2.17 | 2.6  |
| Suv39h2  | 1.84 | 0.47 | 0.43 | NA   | 0.23 |
| Suv420h1 | NA   | 1.15 | 2.01 | 0    | 1.41 |
| Suv420h2 | 0.1  | NA   | 3.66 | 0.35 | 2.65 |
| Suz12    | NA   | 0.97 | 0.43 | 0.83 | 0    |
| Sv2a     | 0.89 | 0    | 1.71 | 0    | 0.11 |
| Sv2b     | 0    | 1.9  | 1.06 | 0.4  | 3.66 |
| Sv2c     | 0.46 | 0    | 0.67 | 0    | 0    |
| Svep1    | NA   | 1.4  | 0    | 0    | 0    |
| Svil     | 0    | 1.64 | 1.65 | 0    | 0    |
| Svip     | NA   | NA   | 1.25 | 1.22 | 0    |
| Svop     | NA   | NA   | 3.56 | 5.54 | 0    |
| Svopl    | NA   | NA   | 3.69 | 0.98 | NA   |
| Swap70   | 0.56 | 0.12 | 0.71 | 0.72 | 0    |
| Swi5     | NA   | NA   | 1.3  | 1.69 | NA   |
| Swsap1   | NA   | NA   | 0.75 | 1.38 | NA   |
| Swt1     | NA   | NA   | 1.27 | 0.52 | NA   |
| Syap1    | 0    | NA   | 1.08 | 2.04 | 0    |
| Sybl1    | 0    | NA   | NA   | NA   | NA   |
| Sybu     | NA   | 1.98 | 2.65 | 1.42 | NA   |
| Syce1    | NA   | NA   | 0    | NA   | 2.21 |
| Syce11   | NA   | 0.69 | 0.94 | 0.88 | NA   |
| Syce2    | NA   | NA   | 3.18 | 0.97 | 0    |
| Syce3    | NA   | NA   | 0    | NA   | NA   |
| Sycn     | 2.89 | NA   | 0    | 4.03 | 2.2  |
| Sycp1    | 0    | 0.97 | 4.69 | 0.34 | 1.95 |
| Sycp2    | NA   | 0.23 | 1.35 | 1.75 | 0    |
| Sycp21   | NA   | NA   | NA   | NA   | 1.28 |
| Sycp3    | 2.43 | NA   | 0    | NA   | 0.82 |
| Syde1    | NA   | 1.29 | 1.15 | 2.97 | 6.2  |
| Syde2    | NA   | NA   | 2.91 | 2.93 | NA   |
| Syf2     | NA   | 4.45 | 0.95 | 1.42 | 0    |
| Syk      | 0.57 | 0.87 | 1.97 | 2.63 | NA   |
| Sympk    | 1.65 | 0    | 1.09 | 1.54 | 0.52 |
| Syn1     | 1.92 | 0.59 | 2.68 | 2.87 | 1.91 |
| Syn2     | 0.11 | 0.77 | 0.34 | 0.98 | 1.11 |
| Syn3     | 0.7  | 0.29 | 0    | 2.54 | 1.38 |
| Sync     | NA   | 0.84 | 0.93 | 0    | 1.41 |

|          |       |      |       |      |      |
|----------|-------|------|-------|------|------|
| Syncrip  | 0     | 1.36 | 0.49  | 0    | 1.98 |
| Syndig1  | NA    | 1.67 | 13.71 | 0.71 | NA   |
| Syndig11 | NA    | NA   | 0     | 0.99 | NA   |
| Syne1    | 0.32  | 0.62 | 1.04  | 0    | 0.31 |
| Syne2    | NA    | 0    | 0.23  | 0    | 1.1  |
| Syne3    | NA    | NA   | 0     | 1.42 | NA   |
| Syne4    | NA    | NA   | 2.63  | 0.62 | NA   |
| Syngr1   | 0.49  | 0.58 | 1.67  | 0.64 | 0.78 |
| Syngr2   | 1.38  | 1.79 | 0.08  | 1.77 | 1.26 |
| Syngr3   | 1.76  | 0    | 0.76  | 1.16 | 0.23 |
| Syngr4   | 1.51  | 2.21 | 0.47  | 3.83 | 0.17 |
| Synj1    | 0.6   | 1.34 | 1.29  | 0    | 0    |
| Synj2    | 2.23  | 0.43 | 0.77  | 1.55 | 0.02 |
| Synj2bp  | 0     | 0    | 0.92  | 0.97 | 1.12 |
| Synm     | NA    | 0.56 | 1.47  | 0    | 0.11 |
| Synpo    | 0.82  | 2.38 | 1.17  | 0.57 | 0.97 |
| Synpo2   | 0.19  | NA   | 0.72  | 1.1  | 0    |
| Synpo21  | 0     | 0.28 | 0.03  | 2.9  | 0.93 |
| Synpr    | 0.21  | NA   | 1.1   | 0.4  | 1.33 |
| Synrg    | NA    | 0    | 1.84  | 0.22 | 0    |
| Syp      | 2.25  | 0    | 1.59  | 1.33 | 1.86 |
| Sypl2    | NA    | NA   | 0.57  | 1.3  | 1.81 |
| Sys1     | NA    | NA   | 1.32  | NA   | 0    |
| Syt1     | 0.75  | 0.79 | 2.18  | 0    | 0.64 |
| Syt10    | 0     | NA   | NA    | 1.49 | NA   |
| Syt11    | 0     | 1.86 | 1.42  | 0    | 0    |
| Syt12    | 3.2   | 1.71 | 0.47  | 2.57 | 0    |
| Syt13    | 1.77  | 2.53 | 0.21  | 2.5  | 1.46 |
| Syt14    | 0.94  | NA   | NA    | 0.6  | NA   |
| Syt15    | 0.19  | NA   | NA    | 1.28 | NA   |
| Syt16    | NA    | NA   | 1.69  | 0    | NA   |
| Syt17    | NA    | 1.08 | 0     | 2.23 | 1.3  |
| Syt2     | 0.11  | 0.52 | 0.17  | 0.67 | 0    |
| Syt3     | 3.9   | NA   | 0.9   | 1.32 | 0    |
| Syt4     | 0.73  | NA   | 1.6   | 1.58 | 0.99 |
| Syt5     | 0.92  | 1.27 | 1.44  | 2.11 | 0    |
| Syt6     | 0.32  | NA   | 0.27  | 0.85 | 0    |
| Syt7     | 0.07  | NA   | 0     | 0    | 0    |
| Syt8     | 1.71  | NA   | 1.97  | 3.3  | 5.76 |
| Syt9     | 1.73  | NA   | 0.9   | 0    | 4.56 |
| Syt11    | 16.24 | NA   | 2.35  | 0.74 | 0    |

|         |      |      |      |      |      |
|---------|------|------|------|------|------|
| Sytl2   | 0.02 | 0    | 0.98 | 2.42 | 1.35 |
| Sytl3   | 1.93 | NA   | 0.87 | 0.62 | 0    |
| Sytl4   | 0.03 | NA   | 0.85 | 0    | 0    |
| Sytl5   | 1.05 | NA   | NA   | 1.17 | NA   |
| Syvn1   | 0.54 | NA   | 1.07 | 0    | 0    |
| Szrd1   | NA   | 0.65 | 0    | 3.49 | NA   |
| Szt2    | NA   | 0    | 0.51 | 0.73 | NA   |
| T       | 2.14 | 3.47 | 1.94 | 0.54 | 1.08 |
| Taar1   | NA   | NA   | 4.32 | 0    | NA   |
| Taar2   | NA   | NA   | NA   | 0    | NA   |
| Taar3   | NA   | NA   | NA   | 0    | NA   |
| Taar5   | NA   | NA   | NA   | 1.45 | NA   |
| Taar6   | NA   | NA   | NA   | 1.52 | NA   |
| Taar9   | NA   | NA   | NA   | 1.21 | NA   |
| Tab1    | NA   | 0.74 | 0.72 | 0    | NA   |
| Tab2    | NA   | 0.46 | 3.2  | 1.33 | NA   |
| Tab3    | NA   | NA   | 2.58 | 0.41 | NA   |
| Tac1    | 0    | 1.6  | 1.32 | 3.32 | 0    |
| Tac4    | 0.68 | NA   | 4.43 | 1.47 | NA   |
| Tacc1   | NA   | 0.22 | 2.05 | 0.43 | 0    |
| Tacc2   | 0.3  | 0.87 | 3.75 | 1.94 | 0    |
| Tacc3   | 0    | 0.78 | 2.68 | 0.18 | 2.81 |
| Taco1   | NA   | NA   | NA   | 0.71 | NA   |
| Tacr1   | 0.63 | 0    | 2.07 | 2.8  | 0    |
| Tacr2   | 0.37 | 0.33 | 0    | 0.72 | 2.35 |
| Tacr3   | 0    | 1.14 | 0.54 | 2.52 | 4.02 |
| Tacstd1 | 1.11 | NA   | NA   | NA   | NA   |
| Tacstd2 | 1.48 | 0.19 | 0.65 | 2.51 | 0    |
| Tada1   | NA   | NA   | 0    | 0.28 | NA   |
| Tada2a  | NA   | 1.31 | 1.13 | 0.86 | NA   |
| Tada2b  | NA   | NA   | 1.58 | 3.13 | NA   |
| Tada2l  | 0    | NA   | NA   | NA   | NA   |
| Tada3   | NA   | 0.5  | 0.97 | 0.15 | NA   |
| Tada3l  | 0    | NA   | NA   | NA   | NA   |
| Taf1    | NA   | 0.86 | 0.85 | 0.3  | 0.76 |
| Taf10   | 0.95 | 0.57 | 4.02 | 0.11 | 0.56 |
| Taf11   | 0    | 0.76 | 0.33 | 2.11 | 8.52 |
| Taf12   | 0.38 | 0    | 2.36 | 0.1  | 1.84 |
| Taf13   | 0.39 | 0.35 | 1.89 | 0.19 | 0    |
| Taf15   | 0    | 0    | 0.71 | 0.11 | 1.98 |
| Taf1a   | 0.54 | 0.61 | 2.64 | 0.21 | 1.65 |

|        |       |      |      |      |      |
|--------|-------|------|------|------|------|
| Taf1b  | 18.04 | 1.45 | 0.76 | 0.49 | 2.7  |
| Taf1c  | 0.87  | 0.02 | 0.26 | NA   | 0    |
| Taf1d  | NA    | 0.69 | 1.63 | NA   | 1.98 |
| Taf2   | 4.36  | 0.25 | 1.49 | 0    | 3.08 |
| Taf3   | 0.28  | NA   | 2.22 | 1.4  | 0    |
| Taf4b  | 0.98  | 1.54 | 1.63 | 0.62 | 0.17 |
| Taf5   | 0     | 2.38 | 1.1  | 1.1  | 2.39 |
| Taf5l  | 0     | 1.21 | 3.89 | 3.1  | 0    |
| Taf6   | 0.27  | 0    | 0    | 2.98 | 0    |
| Taf6l  | 0     | 0.51 | 2.99 | 0    | 0    |
| Taf7   | 0.41  | 0    | 0.65 | 1.13 | 1.67 |
| Taf7l  | 0     | 0.45 | 0.44 | 0.75 | 1.82 |
| Taf8   | NA    | NA   | 1.42 | 5.02 | 1.91 |
| Taf9   | 0     | 0.75 | 1.4  | 0.77 | 0    |
| Taf9b  | NA    | 0.65 | 1.36 | 1.96 | 0.8  |
| Tagap  | 0.11  | NA   | NA   | 3.11 | NA   |
| Tagln  | 0.53  | 0.99 | 2.16 | NA   | 1.65 |
| Tagln2 | 0.72  | 0    | 0.24 | 3.07 | 0    |
| Tagln3 | 2.05  | 0.69 | 0.29 | 0.68 | 0    |
| Tal1   | 1.29  | 0.91 | 2.1  | 0.76 | 3.03 |
| Tal2   | 1.62  | NA   | 0.54 | 0    | 0    |
| Taldo1 | 0.27  | 1.55 | 2.47 | 1.96 | 0.66 |
| Tamm4l | NA    | NA   | 1.75 | 2.42 | NA   |
| Tanc1  | NA    | NA   | 1.55 | 1.77 | 0    |
| Tanc2  | NA    | 0.74 | 1.83 | 0    | 1.47 |
| Tango2 | NA    | NA   | 3.66 | 0.49 | NA   |
| Tango6 | NA    | NA   | 0.28 | 2.41 | NA   |
| Tank   | 0.17  | 0.07 | 2    | 0    | 0    |
| Taok1  | NA    | 0.94 | 0.2  | 0.11 | 0.71 |
| Taok2  | NA    | 0.99 | 0.09 | 0    | 0.22 |
| Taok3  | NA    | 0.04 | 0.73 | 0    | 1.38 |
| Tap1   | 0     | 1.59 | 0.51 | 0    | 0    |
| Tap2   | 0     | 0.84 | 0.75 | 0    | 0.46 |
| Tapbp  | 0.35  | 0.99 | 1.25 | 0.39 | 0    |
| Tapbpl | NA    | 2.12 | 1.12 | 0.78 | 5.35 |
| Tapt1  | NA    | 1.54 | 2.01 | 0.26 | 1.24 |
| Tarbp2 | 0     | 0.98 | 1.73 | 1.15 | 0.97 |
| Tardbp | 0.02  | 0    | 1.42 | 0.68 | 2.18 |
| Tars   | 0.54  | 1.34 | 0.54 | 0.9  | 1.62 |
| Tars2  | NA    | 0.62 | 0.11 | 4.4  | 0.62 |
| Tarsl2 | NA    | NA   | 0.33 | 0.65 | 0    |

|          |      |      |      |      |      |
|----------|------|------|------|------|------|
| Tas1r1   | 2.56 | NA   | 0    | 2.9  | NA   |
| Tas1r2   | 0.22 | NA   | 0.56 | 0.62 | NA   |
| Tas1r3   | NA   | NA   | NA   | 0    | NA   |
| Tasp1    | NA   | 2.35 | 0    | 1.27 | 2.46 |
| Tat      | 2    | 1.58 | 1.79 | 0    | 1.56 |
| Tatdn1   | 2    | NA   | 1.83 | NA   | 1.84 |
| Tatdn2   | NA   | 1.24 | 1.38 | 3.37 | 3.83 |
| Tatdn3   | NA   | NA   | 0.31 | NA   | 0    |
| Tax1bp1  | 2    | 0.52 | 1.03 | 1.29 | 0.89 |
| Tax1bp3  | 0    | 1.79 | 0.43 | 1.06 | 0    |
| Taz      | 0.1  | 1.76 | 0.82 | 0.81 | 1.6  |
| Tbata    | NA   | NA   | 1.88 | 0.31 | NA   |
| Tbc1d1   | 0.25 | 0.61 | 0.48 | 0.99 | 0.85 |
| Tbc1d10a | NA   | NA   | 1.59 | 1.54 | 1.49 |
| Tbc1d10b | NA   | 1.65 | 0    | 2.16 | 1.48 |
| Tbc1d10c | NA   | NA   | 1.2  | 0.69 | 0.06 |
| Tbc1d12  | 0.96 | 0.98 | 0.4  | 1.49 | 2.73 |
| Tbc1d13  | 0.19 | 1.22 | 0.38 | 0    | 0    |
| Tbc1d14  | NA   | NA   | 2.12 | 1.99 | 0    |
| Tbc1d15  | 5.85 | 0    | 1.31 | 1.58 | 0    |
| Tbc1d16  | NA   | 1.8  | 1.7  | 0.31 | 1.09 |
| Tbc1d17  | 0    | 0    | 2.16 | 0    | 2.25 |
| Tbc1d19  | NA   | 1.61 | 2.03 | 0    | 0    |
| Tbc1d2   | 0.25 | 0.06 | 3.53 | 4.07 | NA   |
| Tbc1d20  | NA   | NA   | 0.88 | 0    | 0.22 |
| Tbc1d21  | NA   | NA   | 0    | 0.94 | 2.47 |
| Tbc1d22a | NA   | 0    | 1.88 | 0    | 0    |
| Tbc1d22b | NA   | 0    | 0.83 | 8.79 | NA   |
| Tbc1d23  | NA   | NA   | 1.89 | 0.66 | 2.65 |
| Tbc1d24  | NA   | NA   | 2.39 | 1.76 | 0    |
| Tbc1d25  | NA   | NA   | 1.71 | 1.49 | 0.04 |
| Tbc1d2b  | NA   | 1.46 | 3.23 | 2.85 | 0    |
| Tbc1d30  | NA   | 1.59 | 0.11 | 0    | 4.09 |
| Tbc1d4   | 0.59 | 0    | 2.63 | 2.22 | 3.5  |
| Tbc1d5   | 1.32 | 0    | 0.49 | 0.38 | 0.73 |
| Tbc1d7   | 0.51 | NA   | 0    | 1.8  | 0.14 |
| Tbc1d8   | 0    | 0    | 2.23 | 0.01 | 0.38 |
| Tbc1d8b  | NA   | 1.57 | 1.34 | 0    | 0    |
| Tbc1d9   | NA   | 2.34 | 0.75 | 0    | 0    |
| Tbc1d9b  | NA   | 1.63 | 0.51 | 0    | 1.44 |
| Tbca     | 0.35 | 0    | 1.74 | 0    | 0    |

|         |      |      |      |       |      |
|---------|------|------|------|-------|------|
| Tcbb    | NA   | 0.01 | 2.28 | NA    | 0    |
| Tbcc    | 0.25 | 1.64 | 0.59 | 0.64  | 0    |
| Tbccd1  | NA   | 0    | 2.83 | 0     | 1.07 |
| Tbcd    | 0.73 | 0.36 | 1.22 | 0     | 0.95 |
| Tbce    | 0    | 2.64 | 1.28 | 0.69  | 3.44 |
| Tbcel   | NA   | NA   | 0.78 | 0     | 0    |
| Tbck    | NA   | NA   | 0    | 0.32  | 0    |
| Tbk1    | 0    | 0.03 | 0.57 | 0.78  | 0    |
| Tbkbp1  | NA   | 0    | 0    | 0.42  | 0    |
| Tbl1x   | 0    | 0.55 | 1.01 | 0.74  | 0.04 |
| Tbl1xr1 | NA   | 0.7  | 0.97 | 0.41  | 2.4  |
| Tbl2    | 0.18 | 0.59 | 0.36 | 0.2   | 0.75 |
| Tbl3    | 0.91 | 1.65 | 0.25 | 0     | 1.09 |
| Tbn     | 1.63 | NA   | NA   | NA    | NA   |
| Tbp     | 0.42 | 0.77 | 1.28 | 12.56 | 0    |
| Tbpl1   | 1.35 | 1.52 | 1.94 | NA    | 0    |
| Tbpl2   | NA   | NA   | NA   | 1.18  | NA   |
| Tbr1    | NA   | 1.25 | 1.63 | 0     | 0    |
| Tbrg1   | 0.34 | NA   | 0.77 | 2.57  | 2.99 |
| Tbrg4   | 0.54 | 0.97 | 0.18 | 1.82  | NA   |
| Tbx1    | 0.61 | 0.49 | 0.08 | 0.88  | 9.95 |
| Tbx10   | 0.82 | NA   | NA   | 1.4   | NA   |
| Tbx15   | 0.84 | NA   | 0.62 | 1.35  | 2.09 |
| Tbx18   | 0.81 | NA   | 1.02 | 0.78  | 2.66 |
| Tbx19   | 0    | 3.02 | 0.99 | 0.6   | 4.28 |
| Tbx2    | 0.05 | 0.82 | 1.15 | 0.33  | 0    |
| Tbx20   | NA   | NA   | 1.03 | 1.22  | NA   |
| Tbx21   | 3.47 | 0.08 | 1.44 | 0.95  | 2.32 |
| Tbx22   | 0.45 | NA   | 1.69 | 2.86  | 0.06 |
| Tbx3    | 0    | 0.94 | 0.59 | 1.99  | 1.19 |
| Tbx4    | 1.21 | 0.74 | 0.19 | 0.63  | 0    |
| Tbx5    | 0.05 | 0.68 | 0.19 | 2.42  | 0    |
| Tbx6    | 0    | 1.79 | 0.49 | 0.84  | 11.6 |
| Tbxa2r  | 0.39 | 1.28 | 2.8  | 1.25  | 2.18 |
| Tbxas1  | 0.09 | 3.22 | 1.31 | 3.33  | 0    |
| Tc2n    | NA   | NA   | 0.5  | 1.28  | 0    |
| Tcaim   | NA   | NA   | 0.39 | 0.78  | NA   |
| Tcam1   | NA   | NA   | NA   | NA    | 0    |
| Tcap    | 3.03 | 0.02 | 1.26 | 1.24  | 0    |
| Tcea1   | 0.54 | 0.52 | 4.12 | 1.88  | 7    |
| Tcea2   | 2.56 | 0    | 0.88 | 0     | 0.53 |



|         |      |      |      |      |      |
|---------|------|------|------|------|------|
| Tcea3   | 0.77 | NA   | 2.37 | 2.28 | 0    |
| Tceal1  | 0.46 | 0.66 | 1.91 | 1.26 | 0    |
| Tceal3  | NA   | NA   | 0.94 | 0.41 | NA   |
| Tceal5  | 3.43 | NA   | NA   | 1.45 | NA   |
| Tceal6  | NA   | NA   | NA   | 4.91 | NA   |
| Tceal7  | 0    | NA   | 1.95 | NA   | 2.21 |
| Tceal8  | 0    | NA   | 2.42 | 0    | NA   |
| Tceanc  | NA   | NA   | 0.97 | 1.79 | NA   |
| Tceanc2 | NA   | NA   | 0.61 | 1.21 | NA   |
| Tceb1   | 0    | 3.29 | 2.81 | 0.71 | 1.54 |
| Tceb2   | 0    | 1.06 | 2.94 | 0    | 0.44 |
| Tceb3   | 0.59 | 0.42 | 1.7  | 1.1  | 1.58 |
| Tcerg1  | 0.41 | 1.65 | 0.21 | 3.05 | 0.99 |
| Tcerg11 | 0    | NA   | 0    | 2.06 | 0.77 |
| Tcf1    | 0    | NA   | NA   | NA   | NA   |
| Tcf12   | 0.31 | 0.23 | 1.73 | 2.16 | 1.12 |
| Tcf15   | 3.18 | 3.01 | 2.99 | 1.19 | 0    |
| Tcf19   | 0.64 | NA   | 2.44 | 1.01 | 1.29 |
| Tcf2    | 0.49 | NA   | NA   | NA   | NA   |
| Tcf20   | 1.18 | 0.23 | 0.92 | 1.05 | 0    |
| Tcf21   | 0    | 1.19 | 0.91 | 0.82 | 0    |
| Tcf23   | 2.38 | NA   | NA   | 0.83 | NA   |
| Tcf25   | NA   | 0.05 | 0.48 | 0.12 | 0.77 |
| Tcf3    | 2.04 | 1.97 | 1.98 | 1.35 | 0.91 |
| Tcf4    | 0.25 | 0.74 | 0.75 | 0.75 | 0    |
| Tcf7    | 0.9  | 0    | 0.47 | 0.28 | 2.66 |
| Tcf7l1  | NA   | 1.53 | 1.15 | 1.19 | 1.81 |
| Tcf7l2  | 0.34 | 0    | 0    | 0.38 | 1.42 |
| Tcf15   | 1.52 | 2.76 | 0.14 | NA   | 4.26 |
| Tchh    | NA   | 0.71 | 1.98 | 1.93 | 1.36 |
| Tchhl1  | NA   | NA   | NA   | 1.09 | NA   |
| Tchp    | NA   | NA   | 2.12 | 1.67 | 3.66 |
| Tcirg1  | 0.75 | 0.47 | 1.83 | 0    | 3.29 |
| Tcn2    | 1.17 | 0    | 2.06 | 0    | 0    |
| Tcof1   | 0.8  | 0.89 | 1.03 | 1.83 | 0.09 |
| Tcp1    | 0.1  | 2    | 0.88 | 0.55 | 1.87 |
| Tcp10   | 0    | NA   | NA   | NA   | NA   |
| Tcp11   | 0    | 1.79 | 2.23 | 0.1  | 2.92 |
| Tcp11l1 | NA   | NA   | NA   | 1.69 | NA   |
| Tcp11l2 | NA   | NA   | 0.62 | 0.19 | NA   |
| Tcta    | 0.14 | 1.58 | 1.32 | 1.78 | 0.05 |

|          |      |      |      |      |      |
|----------|------|------|------|------|------|
| Tcte1    | NA   | NA   | 2.46 | NA   | 0    |
| Tcte3    | 0.37 | NA   | NA   | NA   | NA   |
| Tctex1d1 | NA   | NA   | 1.12 | 0.55 | NA   |
| Tctex1d2 | NA   | NA   | 2.28 | 0    | 2.84 |
| Tctex1d4 | NA   | NA   | NA   | 1.08 | NA   |
| Tctn1    | NA   | NA   | NA   | 0.96 | NA   |
| Tctn2    | NA   | 3.08 | 0    | 0.58 | 1.72 |
| Tctn3    | NA   | 0    | 1.8  | 1.1  | 0    |
| Tdg      | 0.31 | 0.99 | 2.18 | NA   | NA   |
| Tdgf1    | 1.23 | NA   | NA   | 1.22 | NA   |
| Tdh      | 0.73 | NA   | 0.15 | 0.98 | NA   |
| Tdo2     | 1.89 | 1.79 | 0.25 | 0    | 2.86 |
| Tdp1     | NA   | 0    | 0.44 | 1.56 | 2.07 |
| Tdp2     | NA   | 3.16 | 0.62 | 0.74 | NA   |
| Tdrd1    | 0.99 | 0    | 1.5  | 0.61 | 0    |
| Tdrd12   | NA   | 1.77 | 2.82 | 1.93 | 1.8  |
| Tdrd3    | 0.08 | 0    | 2.17 | 0.74 | 0    |
| Tdrd5    | NA   | NA   | 0    | 4.08 | 4.58 |
| Tdrd6    | 1.96 | NA   | NA   | 1.42 | NA   |
| Tdrd7    | 1.28 | 0    | 1.47 | 0    | 0    |
| Tdrd9    | 0.18 | NA   | 0.73 | 1.68 | 0    |
| Tdrkh    | 0    | 0    | 2.71 | 0.02 | 1.27 |
| Tead1    | 0.65 | 1.04 | 1.16 | 3.37 | 0    |
| Tead2    | 0    | NA   | 2.48 | 3.83 | 5.98 |
| Tead3    | 0.99 | 0    | 1.42 | 0    | 0    |
| Tead4    | 0.44 | 0.58 | 0.42 | 4.08 | 5.14 |
| Tec      | 0.56 | 4.26 | 0.91 | 0.02 | 2.54 |
| Tecpr1   | NA   | NA   | 3.63 | 0.76 | 1.52 |
| Tecpr2   | NA   | 0.89 | 1.27 | 3.47 | 8.51 |
| Tecr     | NA   | 0    | 0.79 | 2.31 | 3.64 |
| Tecrl    | NA   | NA   | 0    | 0.4  | 0    |
| Tecta    | 0.28 | 0.47 | 2.2  | 1.29 | 0    |
| Tectb    | 0.88 | NA   | 1.5  | 1.82 | NA   |
| Teddm1   | NA   | NA   | NA   | 1.04 | NA   |
| Tef      | 0.46 | 0.97 | 1.52 | 1.69 | 0.06 |
| Tefm     | NA   | 1.47 | 2.19 | 0.78 | NA   |
| Tegt     | 0.54 | NA   | NA   | NA   | NA   |
| Tek      | 2.41 | 0.62 | 0.74 | 0    | 1.08 |
| Tekt1    | 1.56 | NA   | 1.19 | 2.37 | 0    |
| Tekt2    | 1.22 | 2.69 | 0    | 0.14 | 4.36 |
| Tekt3    | 0.25 | NA   | 1.14 | 0.44 | 0    |

|         |      |      |      |      |      |
|---------|------|------|------|------|------|
| Tekt4   | NA   | NA   | NA   | 0.63 | NA   |
| Tekt5   | NA   | NA   | 1.26 | 0.51 | NA   |
| Telo2   | NA   | 0    | 1.18 | 1.57 | 0    |
| Ten1    | NA   | NA   | 1.68 | 1.61 | NA   |
| Tenc1   | 0.07 | 1.18 | 2.89 | 0.4  | 3.39 |
| Tenm1   | NA   | 0    | 0    | 0.66 | NA   |
| Tenm2   | NA   | NA   | 0.82 | 0.01 | NA   |
| Tenm3   | NA   | 1.69 | 0.93 | 0    | NA   |
| Tenm4   | NA   | 0.23 | 6.7  | 0    | NA   |
| Tenr    | 0.89 | NA   | NA   | NA   | NA   |
| Tep1    | 1.22 | 1.38 | 2.29 | 0    | 0.11 |
| Tepp    | NA   | NA   | 0.3  | 1.94 | 1.57 |
| Terc    | 1.77 | NA   | NA   | 0.16 | NA   |
| Terf1   | 2.33 | 2.16 | 1.18 | 0.96 | 2.42 |
| Terf2   | 0    | 0    | 0.59 | 3.01 | 0    |
| Terf2ip | 0    | 0.95 | 1.08 | NA   | 0    |
| Tert    | 1.41 | 1.27 | 0.65 | 2.81 | 1.73 |
| Tes     | 1.2  | 1.01 | 0.76 | 0.27 | 0.97 |
| Tesc    | 0    | 0    | 0.3  | 0.26 | NA   |
| Tesk1   | 1.07 | 0.2  | 2.19 | 2.03 | 0.05 |
| Tesk2   | 0.99 | 0.15 | 2.99 | 1.31 | 0    |
| Tespa1  | NA   | 0    | 0.5  | 0.82 | NA   |
| Tessp2  | 2.19 | NA   | NA   | NA   | NA   |
| Tet1    | NA   | NA   | 0    | 1.18 | 0    |
| Tet2    | NA   | NA   | 1.42 | 1.25 | 0.53 |
| Tet3    | NA   | 0.4  | 2.05 | 1.13 | 0    |
| Tex10   | 0.11 | 0    | 1.56 | 3.2  | 0.18 |
| Tex101  | 1.77 | NA   | 0    | 0.58 | 0    |
| Tex11   | 1.86 | 2.08 | 0.61 | 0    | 6.15 |
| Tex12   | 1.46 | 1.5  | 3.38 | 1.32 | 0.62 |
| Tex13a  | NA   | 0.62 | 0.29 | 0.72 | 3.52 |
| Tex14   | 0    | 1.33 | 0.07 | 0.48 | 6.02 |
| Tex15   | 2.82 | 1.24 | 2.6  | 0    | 0.02 |
| Tex2    | 0    | 0.13 | 0.83 | 0.71 | 0.38 |
| Tex22   | NA   | NA   | 1.29 | NA   | NA   |
| Tex26   | NA   | NA   | 1.5  | 2.68 | NA   |
| Tex261  | 0.46 | 1.01 | 1.65 | 0.71 | 2.7  |
| Tex264  | 0.55 | 0.7  | 2.11 | 1.04 | 2.51 |
| Tex28   | NA   | NA   | NA   | 5.68 | NA   |
| Tex29   | NA   | NA   | 0.56 | 2.08 | NA   |
| Tex30   | NA   | 1.65 | 1.09 | 0    | NA   |

|         |      |      |      |      |      |
|---------|------|------|------|------|------|
| Tex33   | NA   | NA   | 1.37 | 1.85 | NA   |
| Tex35   | NA   | NA   | 4.16 | 0    | NA   |
| Tex36   | NA   | NA   | 1.34 | 3.17 | NA   |
| Tex37   | NA   | NA   | 0    | 2.95 | NA   |
| Tex38   | NA   | NA   | 1.36 | 3.22 | NA   |
| Tex40   | NA   | 1.06 | 0.08 | NA   | NA   |
| Tex9    | 0    | NA   | 1.35 | 0.82 | 0.05 |
| Tfam    | 0    | 1.57 | 1.62 | 0.62 | 1.06 |
| Tfap2a  | NA   | 0.11 | 1.06 | 0.95 | NA   |
| Tfap2b  | NA   | 0.9  | 0.67 | 0.93 | NA   |
| Tfap2c  | NA   | 0.17 | 0.33 | 0    | NA   |
| Tfap2d  | NA   | NA   | 4.69 | 3.62 | NA   |
| Tfap2e  | NA   | NA   | 0.3  | 1.91 | NA   |
| Tfap4   | NA   | 1.45 | 2.59 | 2.02 | NA   |
| Tfb1m   | 0.22 | 0    | 0.58 | 0.74 | 0    |
| Tfb2m   | 0.41 | 0.12 | 0.31 | 0.67 | 0    |
| Tfcp2   | NA   | 0    | 1.26 | 0.81 | NA   |
| Tfcp2l1 | NA   | 0.83 | 0.8  | 0.36 | NA   |
| Tfdp1   | 0.89 | 1.7  | 0.94 | 0.21 | 0    |
| Tfdp2   | NA   | 2.14 | 0.47 | 0    | 1.02 |
| Tfe3    | NA   | 1.37 | 1.24 | 1.63 | NA   |
| Tfeb    | NA   | 2.63 | 0.76 | 0.87 | NA   |
| Tfec    | NA   | 0.06 | 1.08 | 0    | NA   |
| Tff1    | 0.54 | 1.43 | 0.33 | 1.22 | 3.62 |
| Tff2    | 4.37 | 2.02 | 0    | 0.69 | 1.77 |
| Tff3    | 0    | 2.57 | 3    | 1.96 | 3.37 |
| Tfg     | 0.4  | 0.88 | 1.41 | 0.89 | 3.14 |
| Tfip1l1 | 1.46 | 0    | 1.51 | 1.48 | 0    |
| Tfpi    | 0.25 | 0    | 1.13 | 0    | 1.49 |
| Tfpi2   | 0    | 1.43 | 3.29 | 0.55 | 5.85 |
| Tfpt    | 1.67 | 0.01 | 1.06 | 1.29 | 2.56 |
| Tfr2    | NA   | 1.23 | 0.63 | 1.81 | NA   |
| Tfrc    | 0.71 | 1.05 | 2.24 | 0    | 2.36 |
| Tg      | NA   | 2.12 | 0.65 | 0.15 | 0    |
| Tgds    | NA   | 1.31 | 0.91 | 1.19 | 0    |
| Tgfa    | 0.31 | 1.38 | 0.11 | 1.79 | 1.91 |
| Tgfb1   | 0.78 | 0.07 | 2.51 | 1.52 | 1.97 |
| Tgfb1l1 | 2.62 | 2.58 | 2.23 | 2.12 | 1.81 |
| Tgfb2   | 1.64 | 2.42 | 1.28 | 2.8  | 0.89 |
| Tgfb3   | 1.66 | 1.08 | 2.15 | 0.53 | 0    |
| Tgfb1   | 1.32 | 3.44 | 0.08 | 0.74 | 0    |

|          |      |      |      |      |      |
|----------|------|------|------|------|------|
| Tgibr1   | 0.55 | 0.07 | 2.83 | 3.77 | 0    |
| Tgibr2   | 0    | 0.61 | 2.07 | NA   | 0.55 |
| Tgibr3   | 0.88 | 0    | 0.04 | 1.73 | 0    |
| Tgibrap1 | 0.71 | 0    | 2.66 | 3.38 | 0.85 |
| Tgif1    | NA   | 1.3  | 2.05 | 0.32 | 2.59 |
| Tgif2    | 0    | 1.41 | 0.85 | 1.59 | 0.45 |
| Tgm1     | 0.55 | 1.55 | 0    | 0.65 | 0    |
| Tgm2     | 0.04 | 2.19 | 0.04 | 4.08 | 0.14 |
| Tgm3     | 0.41 | 0.1  | 1.18 | 1.67 | 0    |
| Tgm4     | 0.6  | 0.56 | 2.09 | 0    | NA   |
| Tgm5     | 0    | 1.78 | 0.2  | 0.26 | 0    |
| Tgm6     | 1.65 | NA   | 0    | 1.54 | 2.38 |
| Tgm7     | NA   | NA   | NA   | 1.26 | NA   |
| Tgoln2   | 4.11 | 0.81 | 0.63 | 2.09 | NA   |
| Tgs1     | NA   | 0.24 | 1.15 | 0    | 0.05 |
| Th       | 0.25 | 1.89 | 1.64 | 1.92 | 5.95 |
| Th11     | 0.39 | NA   | NA   | NA   | 2.76 |
| Thada    | 0    | 0    | 0.63 | 1.41 | 2.17 |
| Thap1    | 0.36 | 0.85 | 1.6  | 1.06 | 1.79 |
| Thap11   | 0.11 | 0.61 | 1.51 | 1.25 | 1.6  |
| Thap2    | NA   | NA   | 1.02 | 0.07 | 1.09 |
| Thap3    | NA   | 2.87 | 1.58 | 0.97 | 2.43 |
| Thap4    | NA   | 0.89 | 0.16 | 0.97 | 1.28 |
| Thap6    | 0.06 | NA   | 0.48 | 1.67 | 0    |
| Thap7    | 0.1  | 0.13 | 0.14 | 2.46 | 0    |
| Thbd     | 0.52 | 1.57 | 0.54 | 0.14 | 0    |
| Thbs1    | 0.15 | 0.81 | 2.8  | 1.99 | 0    |
| Thbs2    | 0.61 | 0.53 | 3.26 | 0    | 0    |
| Thbs3    | 0    | 2.48 | 1.53 | 0.65 | 0    |
| Thbs4    | 1.98 | 1.86 | 1.9  | 0.9  | 0    |
| Theg     | 0.33 | 2.53 | 0.95 | 0.91 | 0    |
| Them2    | 0.2  | NA   | NA   | NA   | NA   |
| Them4    | NA   | NA   | 1.55 | 1.21 | 0    |
| Them5    | NA   | NA   | 0.97 | 0.78 | NA   |
| Them6    | NA   | 0    | 1.05 | 0.53 | NA   |
| Themis   | NA   | NA   | 1.55 | 1.84 | NA   |
| Themis2  | NA   | 1.01 | 3.87 | 0.85 | NA   |
| Thg11    | NA   | 1.14 | 0.7  | 1.07 | 2.9  |
| Thns11   | 0.47 | 0.18 | 1.98 | 0.81 | 1.58 |
| Thns12   | NA   | 0.45 | 0.01 | 1.11 | 2.06 |
| Thoc1    | 1.4  | 1.64 | 0.2  | 0.5  | 0    |

|         |      |      |      |      |      |
|---------|------|------|------|------|------|
| Thoc2   | NA   | 2.2  | 1.29 | 0    | 3.01 |
| Thoc3   | 0.08 | NA   | NA   | NA   | NA   |
| Thoc4   | 1.1  | NA   | NA   | NA   | 0    |
| Thoc5   | NA   | 2.21 | 1.55 | 0.65 | 0.96 |
| Thoc6   | NA   | 1.84 | 0    | 0    | 0    |
| Thoc7   | NA   | 0    | 1.84 | 0.22 | NA   |
| Thop1   | 0.12 | 1.27 | 0.05 | 2.36 | 0    |
| Thpo    | 1.36 | 0.83 | 1.46 | 1.15 | 6.8  |
| Thra    | 0.96 | 0.76 | 3.09 | NA   | 1.52 |
| Thrap1  | 1.88 | NA   | NA   | NA   | NA   |
| Thrap2  | 0.54 | NA   | NA   | NA   | NA   |
| Thrap3  | 1.07 | 0.77 | 0.61 | 1.93 | 0.62 |
| Thrap4  | 0.27 | NA   | NA   | NA   | NA   |
| Thrap5  | 2.27 | NA   | NA   | NA   | NA   |
| Thrap6  | 1.05 | NA   | NA   | NA   | NA   |
| Thrb    | 2.31 | 0.89 | 1.68 | 0    | 0    |
| Thrsp   | 0    | NA   | 0    | 0.43 | 1.89 |
| Thsd1   | 0.83 | NA   | NA   | 1.61 | NA   |
| Thsd4   | NA   | 1    | 0    | 1.09 | 0    |
| Thsd7a  | NA   | 0.31 | 0.85 | 0.17 | 0    |
| Thsd7b  | NA   | NA   | 0.03 | 2.64 | 1.04 |
| Thtpa   | 0.03 | 1.44 | 0.01 | 1    | 1.07 |
| Thumpd1 | 0.62 | 0.8  | 1.74 | 1.29 | 0    |
| Thumpd2 | 0    | 0.18 | 0.27 | 1.12 | 1.27 |
| Thumpd3 | NA   | NA   | 1.65 | 1.14 | 0    |
| Thy1    | 0.41 | 1.13 | 1.27 | 2.66 | 1.96 |
| Thyn1   | NA   | 1.11 | 1.46 | 0    | 0    |
| Tia1    | 0.86 | 1.08 | 0.86 | 0.79 | 0    |
| Tiaf1   | 1.65 | NA   | NA   | NA   | NA   |
| Tial1   | 0.62 | 0.89 | 0.73 | 2.61 | 0.84 |
| Tiam1   | 0.96 | 1.05 | 0    | 1.33 | 0    |
| Tiam2   | 1.81 | 0.2  | 1.33 | NA   | 0.7  |
| Ticam1  | NA   | 1.36 | 2.12 | 1.06 | 5.22 |
| Ticam2  | 0.69 | NA   | NA   | NA   | NA   |
| Ticrr   | NA   | NA   | 1.19 | 1.49 | NA   |
| Tie1    | 3.02 | 1.57 | 0.45 | 1.41 | 2.94 |
| Tifa    | NA   | NA   | 1.9  | 0.6  | 0    |
| Tifab   | NA   | NA   | 0    | 0.74 | 7    |
| Tigd2   | 0.1  | NA   | 2.15 | 0.15 | 2.51 |
| Tigd3   | 0    | NA   | 4.57 | 4.49 | 3.12 |
| Tigd4   | 0.08 | NA   | NA   | 3.61 | NA   |

|          |       |      |      |      |      |
|----------|-------|------|------|------|------|
| Tigd5    | 1.42  | NA   | 1.14 | 1.54 | 0.82 |
| Tigit    | NA    | NA   | NA   | 1.44 | NA   |
| Timd4    | 0.36  | NA   | 3.01 | 0    | NA   |
| Timeless | 0     | 0.88 | 2.07 | 0    | 1.85 |
| Timm10   | 0.13  | 0.19 | 1.31 | 2.33 | 2.89 |
| Timm10b  | NA    | 2.27 | 1.39 | 1.93 | NA   |
| Timm13   | NA    | 1.62 | 1.34 | NA   | 2.1  |
| Timm17a  | 0.46  | 0.71 | 0.9  | 0.97 | 0    |
| Timm17b  | 0     | 2.06 | 0.57 | 1.5  | 0    |
| Timm21   | NA    | NA   | 2.63 | 0.4  | NA   |
| Timm22   | 0     | 1.56 | 0    | 0.6  | 0    |
| Timm23   | 0     | 0.34 | 1.09 | 0.08 | NA   |
| Timm44   | 0     | 1.43 | 2.38 | 0.9  | 0    |
| Timm50   | 3.56  | 0.57 | 0.57 | 0.85 | 0.85 |
| Timm8a   | 0.18  | NA   | NA   | NA   | NA   |
| Timm8b   | 1.88  | 0    | 0.13 | NA   | 3.98 |
| Timm9    | 3.51  | 0    | 0.16 | NA   | 1.67 |
| Timmdc1  | NA    | NA   | 0.32 | 1.21 | NA   |
| Timp1    | 0.81  | 0.53 | 0.56 | 0.23 | 0    |
| Timp2    | 0.39  | 1.59 | 1.74 | 1.67 | 1.08 |
| Timp3    | 0     | 0.66 | 0.89 | 1.5  | 1.07 |
| Timp4    | 0.31  | 0.34 | 0.63 | 0.49 | 1.45 |
| Tinag    | 0.14  | NA   | 0.08 | 0    | 0    |
| Tinagl1  | NA    | 1.38 | 0    | 3.08 | 0.41 |
| Tinf2    | 0.41  | 0    | 0.68 | 0.12 | 1.27 |
| Tiparp   | 0.03  | 0.12 | 1.6  | 2.65 | 0    |
| Tipin    | 0     | 1.65 | 2.67 | 0.99 | 0    |
| Tiprl    | NA    | 1.82 | 1.77 | 3.26 | 2.06 |
| Tirap    | 0.74  | NA   | 0.98 | 1.6  | 2.08 |
| Titf1    | 1.17  | NA   | NA   | NA   | NA   |
| Tjap1    | NA    | 2.76 | 0.72 | 3.55 | 0    |
| Tjp1     | 19.16 | 0.4  | 0.84 | 0.15 | 2    |
| Tjp2     | 0.4   | 0.39 | 0.99 | 4.06 | 0.63 |
| Tjp3     | 1     | 1.62 | 3.96 | NA   | 0    |
| Tk1      | 0.03  | 2.65 | 2.18 | 2.36 | 0    |
| Tk2      | 0     | 1.95 | 1.35 | 0.12 | 0.19 |
| Tkt      | 0     | 2.15 | 0    | 0.68 | 1.22 |
| Tktl1    | 1.01  | 0    | 0.22 | 0    | 1.63 |
| Tktl2    | NA    | NA   | 4.28 | 6.16 | 0    |
| Tlcd1    | NA    | NA   | 1.33 | 0.51 | 0    |
| Tlcd2    | NA    | NA   | 0.66 | 1.69 | NA   |

|         |      |      |      |      |      |
|---------|------|------|------|------|------|
| Tldc1   | NA   | 0    | 0.65 | 0    | NA   |
| Tldc2   | NA   | NA   | NA   | 3.2  | NA   |
| Tle1    | 0.47 | 0.27 | 0.9  | 4.32 | 0    |
| Tle2    | 0.49 | 3.6  | 1.53 | 0.41 | 0    |
| Tle3    | 0.35 | 2.44 | 0.9  | 0    | 0    |
| Tle4    | 1.21 | 0.84 | 1.18 | 1    | 0    |
| Tle6    | 1.1  | 1.26 | 1.54 | 1.56 | 3.58 |
| Tlk1    | 0.03 | 1.35 | 1.55 | 0.83 | 0    |
| Tlk2    | 0.34 | 0.59 | 0.68 | 0.92 | 0    |
| Tll1    | 1    | 0    | 0    | 0.54 | 1.74 |
| Tll2    | 0.23 | 1.23 | 1.6  | 0    | 3.53 |
| Tln1    | 0.95 | 1.51 | 3.27 | 0    | 1.68 |
| Tln2    | 0.51 | 0.61 | 1.28 | 0    | 2.3  |
| Tloc1   | 1.14 | NA   | NA   | NA   | NA   |
| Tlr1    | 0.49 | 0.93 | 2.7  | 0.9  | 2.15 |
| Tlr2    | 0.24 | 0.3  | 1.51 | 2.45 | 0    |
| Tlr3    | 0.46 | 0.54 | 2.21 | 0.02 | 0.19 |
| Tlr4    | 2.47 | 0.65 | 0.35 | 4.12 | 0    |
| Tlr5    | 0    | 0    | 0    | 0.12 | 0    |
| Tlr6    | 0    | 0.36 | 1.57 | 2.6  | 0.33 |
| Tlr7    | 0.27 | 1.17 | 2.12 | 0    | 2.22 |
| Tlr8    | 1.02 | 0    | 2.82 | 0.92 | 3.13 |
| Tlr9    | 2.02 | NA   | 1.98 | 1.56 | 1.66 |
| Tlx1    | 1.13 | 1.89 | 0.38 | 0.25 | 0    |
| Tlx2    | 0.65 | 1.53 | 2.13 | 0.98 | 0    |
| Tlx3    | 0    | 1.97 | 0.83 | 1.33 | 0    |
| Tm2d1   | NA   | 0.55 | 1.16 | 3.06 | 1.01 |
| Tm2d2   | NA   | NA   | 1.13 | 0.79 | 2.22 |
| Tm2d3   | NA   | 1.28 | 2.49 | NA   | 0    |
| Tm4sf1  | 0    | 0.48 | 0.7  | 1.91 | 2.29 |
| Tm4sf11 | 0    | NA   | NA   | NA   | NA   |
| Tm4sf19 | NA   | NA   | NA   | 0.99 | NA   |
| Tm4sf20 | NA   | 0    | 1.98 | 0.51 | 0    |
| Tm4sf4  | 0    | 1.68 | 1.1  | 0.89 | 1.24 |
| Tm4sf5  | 0    | 1.86 | 2.45 | 3.05 | 9.27 |
| Tm6sf1  | 9.35 | 1.13 | 0.93 | 0.29 | 3.47 |
| Tm6sf2  | 0.55 | 2.15 | 1.14 | 1.59 | 0    |
| Tm7sf2  | 0    | 1.23 | 2.36 | 2.6  | 0.67 |
| Tm7sf3  | 0    | 1.2  | 0    | 1.05 | 0    |
| Tm7sf4  | 0.33 | NA   | NA   | NA   | 0    |
| Tm9sf1  | 0    | 1.39 | 1.01 | 1.92 | 0    |



|         |      |      |      |      |      |
|---------|------|------|------|------|------|
| Tm9sf2  | 0    | 0.01 | 2.32 | 1.33 | 1.45 |
| Tm9sf3  | NA   | 0.12 | 1.15 | 1.04 | 0    |
| Tm9sf4  | 0.45 | 0.86 | 6.11 | 1.6  | 0    |
| Tma16   | NA   | 2.57 | 1.61 | 2.06 | NA   |
| Tma7    | NA   | 1.15 | 2.1  | 0    | NA   |
| Tmbim1  | NA   | 1.59 | 2.16 | 2.78 | 2.01 |
| Tmbim4  | NA   | 0.04 | 1.43 | 1.7  | 3.83 |
| Tmbim6  | NA   | 1.32 | 1.02 | 1.33 | 0.26 |
| Tmc1    | 0    | NA   | 0.03 | 1.45 | NA   |
| Tmc2    | 0    | NA   | 3.32 | 0.11 | NA   |
| Tmc3    | 2.26 | NA   | NA   | 9.83 | NA   |
| Tmc4    | 0    | NA   | 1.62 | 2.32 | 0.99 |
| Tmc5    | 1.6  | 1.9  | 0.47 | 0    | 7.79 |
| Tmc6    | 0.15 | 0    | 1.8  | 0.93 | 0    |
| Tmc7    | 0    | 2.01 | 0.31 | 0    | 1.32 |
| Tmc8    | NA   | NA   | 0    | 1.22 | 3.27 |
| Tmcc1   | NA   | 1.39 | 0.6  | 5.14 | 1.94 |
| Tmcc2   | NA   | 2.48 | 1.29 | 2.48 | 3.15 |
| Tmcc3   | NA   | NA   | 2.31 | 2.17 | 0    |
| Tmco1   | NA   | 1.98 | 0    | 0    | 0    |
| Tmco2   | NA   | NA   | 1.65 | 3.72 | 2.48 |
| Tmco3   | NA   | 0    | 0.29 | 1.03 | 0    |
| Tmco4   | NA   | NA   | 0.15 | 5.86 | 0    |
| Tmco5b  | NA   | NA   | NA   | NA   | 0    |
| Tmco6   | NA   | 0    | 0.74 | 0.45 | 1.84 |
| Tmco7   | NA   | NA   | NA   | NA   | 6.59 |
| Tmed1   | NA   | 3.08 | 1.33 | 0.74 | 2.89 |
| Tmed10  | NA   | 1.73 | 1.35 | 0.04 | 3.25 |
| Tmed2   | NA   | 1.03 | 3.97 | 0.96 | 0    |
| Tmed3   | NA   | 0.98 | 0.76 | 0.94 | 6.02 |
| Tmed4   | NA   | NA   | 0.43 | 0.06 | 0    |
| Tmed5   | NA   | 0.21 | 0.43 | 0.77 | 1.83 |
| Tmed6   | NA   | NA   | 0    | 0.71 | 0    |
| Tmed7   | NA   | 0.99 | 1.98 | NA   | 0    |
| Tmed8   | NA   | NA   | 0    | 0.14 | 1.37 |
| Tmed9   | NA   | 1.5  | 0.51 | 1.78 | 0    |
| Tmeff1  | 1.27 | 0    | 0.58 | 0.64 | 1.26 |
| Tmeff2  | 0    | NA   | 0.27 | 0    | 1.27 |
| Tmem1   | 0.07 | NA   | NA   | NA   | NA   |
| Tmem10  | 0.06 | NA   | NA   | NA   | NA   |
| Tmem100 | NA   | 1.05 | 0.8  | 0    | 2.52 |

|          |    |      |      |      |      |
|----------|----|------|------|------|------|
| Tmem101  | NA | NA   | 3.01 | 3.88 | 0    |
| Tmem102  | NA | NA   | 2.31 | 0    | 0    |
| Tmem104  | NA | 0.86 | 1.71 | 0.03 | 2.03 |
| Tmem106a | NA | NA   | 0.8  | 0.01 | 3.98 |
| Tmem106b | NA | 1.63 | 0.8  | 4.64 | 0    |
| Tmem106c | NA | 1.5  | 0.65 | 0    | 0.61 |
| Tmem107  | NA | NA   | 0    | 0.25 | 0    |
| Tmem108  | NA | NA   | 0.01 | 1.21 | 5.32 |
| Tmem109  | NA | 1.29 | 0.93 | 0.03 | 0    |
| Tmem11   | NA | 0    | 5.31 | 0.67 | 0.36 |
| Tmem110  | NA | 0    | 1.57 | 4.05 | 2.31 |
| Tmem111  | NA | NA   | NA   | NA   | 1.26 |
| Tmem114  | NA | NA   | NA   | NA   | 0    |
| Tmem115  | NA | 1.83 | 1.85 | 2.49 | 0    |
| Tmem116  | NA | NA   | 1.02 | 3.56 | 0    |
| Tmem117  | NA | NA   | 4.38 | 0    | 0.67 |
| Tmem119  | NA | NA   | 2.42 | 0.86 | 1.36 |
| Tmem120a | NA | NA   | 2.6  | 2.42 | 0    |
| Tmem120b | NA | 1.01 | 1.51 | 0    | 0.85 |
| Tmem121  | NA | 1.41 | 2.78 | 0.6  | 0    |
| Tmem123  | NA | 0.64 | 0.04 | 0.63 | 0    |
| Tmem125  | NA | NA   | 1.39 | 2.85 | 1.23 |
| Tmem126a | NA | NA   | 3.94 | 0.41 | 0    |
| Tmem126b | NA | 4.53 | 1.01 | 0.44 | 0.72 |
| Tmem127  | NA | 0.77 | 0    | 0    | 0    |
| Tmem128  | NA | NA   | 3.08 | 0.02 | 1.51 |
| Tmem129  | NA | NA   | 0.19 | 0.96 | 0    |
| Tmem130  | NA | NA   | 0.22 | 0    | 6.34 |
| Tmem131  | NA | 3.15 | 2.28 | 0.13 | 0    |
| Tmem132a | NA | 2.26 | 0.58 | 0.34 | 3.9  |
| Tmem132b | NA | NA   | NA   | 1.53 | NA   |
| Tmem132c | NA | NA   | 0.03 | 0.22 | 0    |
| Tmem132d | NA | NA   | 0    | 0.65 | 4.05 |
| Tmem132e | NA | NA   | 1.1  | 0    | 2.15 |
| Tmem134  | NA | 0    | 0.65 | 0.43 | 0.51 |
| Tmem135  | NA | 0.5  | 1.01 | 0    | 4.24 |
| Tmem136  | NA | NA   | 1.21 | 0.52 | 1.33 |
| Tmem138  | NA | NA   | 0.96 | 2.95 | 0    |
| Tmem139  | NA | NA   | 2.29 | 1.19 | 0    |
| Tmem140  | NA | 2.15 | 2.16 | NA   | 0    |
| Tmem141  | NA | NA   | 2.08 | 1.43 | 0    |

|          |      |      |      |       |       |
|----------|------|------|------|-------|-------|
| Tmem143  | NA   | 0.62 | 0.83 | 0.79  | 0     |
| Tmem144  | NA   | 1.26 | 0.98 | 1.93  | 0.68  |
| Tmem145  | NA   | NA   | NA   | 1.5   | NA    |
| Tmem146  | NA   | NA   | NA   | NA    | 0     |
| Tmem147  | NA   | 2.16 | 2.44 | 0.1   | 0     |
| Tmem149  | NA   | NA   | NA   | NA    | 0.54  |
| Tmem14a  | 0.84 | 0    | 1.94 | 1.44  | 2.74  |
| Tmem14c  | 0.52 | NA   | 1.57 | 0.22  | 0     |
| Tmem150a | NA   | NA   | 0.98 | 2.45  | 0.77  |
| Tmem150b | NA   | NA   | 1.57 | NA    | NA    |
| Tmem150c | NA   | NA   | 0.94 | NA    | NA    |
| Tmem151a | NA   | NA   | 3.09 | 1.01  | 2.18  |
| Tmem151b | NA   | 0.16 | 0.43 | 2.12  | 0     |
| Tmem154  | NA   | NA   | 1.98 | 1.01  | 0     |
| Tmem158  | NA   | 0.62 | 8.09 | 1.52  | 0     |
| Tmem159  | NA   | 0.89 | 2.31 | 0.72  | 0.89  |
| Tmem160  | NA   | 1.33 | 5.5  | 2.23  | 0     |
| Tmem161a | NA   | 0    | 1.72 | 2.69  | 1.57  |
| Tmem161b | NA   | NA   | 1.38 | 0.67  | 3.27  |
| Tmem163  | NA   | NA   | 4.85 | 1.52  | NA    |
| Tmem164  | NA   | 3.33 | 1.52 | 2.8   | 2.38  |
| Tmem165  | NA   | 0    | 7.42 | 0.38  | 0     |
| Tmem167b | NA   | NA   | 2.58 | 1.46  | 1.59  |
| Tmem168  | NA   | 0.82 | 2.01 | 0.13  | 1.56  |
| Tmem169  | NA   | NA   | 2.32 | 1.41  | 0.44  |
| Tmem16b  | 0.04 | NA   | NA   | NA    | NA    |
| Tmem16d  | 0.6  | NA   | NA   | NA    | NA    |
| Tmem16f  | 0    | NA   | NA   | NA    | NA    |
| Tmem17   | 1.2  | NA   | 0.23 | 0.42  | 0     |
| Tmem170b | NA   | NA   | 2.76 | NA    | 6.21  |
| Tmem171  | NA   | NA   | 1.34 | 0.93  | 0.87  |
| Tmem173  | NA   | NA   | 1.76 | 2.52  | 0     |
| Tmem174  | NA   | NA   | 1.06 | 2.47  | 0     |
| Tmem175  | NA   | NA   | 1.86 | 1.22  | 0     |
| Tmem176a | NA   | 2.74 | 2.22 | 1.07  | 3.12  |
| Tmem176b | NA   | 3.28 | 2.17 | 12.11 | 3.68  |
| Tmem177  | NA   | 0    | 0.81 | 0.96  | 1.55  |
| Tmem178  | NA   | NA   | NA   | NA    | 0     |
| Tmem179  | NA   | NA   | 1.87 | 0.17  | 0     |
| Tmem179b | NA   | NA   | 0.02 | NA    | 14.81 |
| Tmem18   | 0.42 | NA   | 2.22 | 3.09  | 1.34  |

|          |      |      |      |      |       |
|----------|------|------|------|------|-------|
| Tmem180  | NA   | 0    | 1.49 | 3.16 | 1.93  |
| Tmem182  | NA   | NA   | 0.86 | 1.96 | 0.23  |
| Tmem183a | NA   | 2.38 | 0.8  | NA   | 0     |
| Tmem184a | NA   | NA   | 2.86 | 1.34 | 8.51  |
| Tmem184b | NA   | 3.73 | 2.87 | 0    | 0     |
| Tmem184c | NA   | 1.1  | 2    | 0.54 | 0     |
| Tmem185b | NA   | 0.17 | 2.89 | 1.09 | 18.46 |
| Tmem186  | NA   | 2.11 | 0.95 | 2.61 | 2.62  |
| Tmem188  | NA   | NA   | NA   | NA   | 0.49  |
| Tmem189  | NA   | NA   | 1.88 | NA   | NA    |
| Tmem19   | 0    | 0.8  | 0.74 | 0.01 | 0     |
| Tmem190  | NA   | NA   | 7.4  | 1.13 | NA    |
| Tmem192  | NA   | NA   | 0.74 | 1.73 | 1.87  |
| Tmem194b | NA   | NA   | 1.6  | 0.32 | 0.14  |
| Tmem196  | NA   | NA   | NA   | 1.95 | NA    |
| Tmem198  | NA   | NA   | 1.09 | 6.18 | 4.12  |
| Tmem198b | NA   | NA   | 1.02 | 1.36 | NA    |
| Tmem199  | NA   | 3.04 | 1.9  | 0.89 | 0     |
| Tmem2    | 0.24 | 0.5  | 0.98 | 3.11 | 0.31  |
| Tmem20   | 0.5  | NA   | NA   | NA   | NA    |
| Tmem200a | NA   | NA   | 0.61 | 1.19 | 0     |
| Tmem200c | NA   | NA   | 0    | NA   | NA    |
| Tmem201  | NA   | NA   | 0    | 1.36 | 1.05  |
| Tmem202  | NA   | NA   | NA   | 0    | NA    |
| Tmem203  | NA   | NA   | 1.88 | 0    | 0     |
| Tmem204  | NA   | 0    | 1.12 | 1.03 | 0.72  |
| Tmem205  | NA   | NA   | 2.12 | 1.5  | 1.18  |
| Tmem206  | NA   | 1.51 | 0.5  | 0.95 | 0     |
| Tmem207  | NA   | NA   | 0.45 | 0.99 | 2.25  |
| Tmem208  | NA   | 0    | 0.98 | NA   | 1.57  |
| Tmem209  | NA   | 1.14 | 0.57 | 0.52 | 0     |
| Tmem211  | NA   | NA   | NA   | 0.08 | NA    |
| Tmem212  | NA   | 0    | 2.52 | 1.13 | 1.24  |
| Tmem213  | NA   | NA   | 1.06 | NA   | 0     |
| Tmem214  | NA   | 0    | 1.16 | 0.09 | 1.27  |
| Tmem215  | NA   | NA   | NA   | 0.62 | NA    |
| Tmem216  | NA   | NA   | 1.06 | NA   | 3.52  |
| Tmem217  | NA   | NA   | 2.3  | 0.05 | 2.25  |
| Tmem218  | NA   | NA   | 0.69 | 0.16 | 4.59  |
| Tmem219  | NA   | NA   | 0.77 | 0.02 | 0     |
| Tmem220  | NA   | NA   | NA   | 0.84 | NA    |

|          |      |      |      |      |      |
|----------|------|------|------|------|------|
| Tmem221  | NA   | NA   | NA   | 0.32 | NA   |
| Tmem222  | NA   | 1.83 | 0.12 | 0    | NA   |
| Tmem223  | NA   | 0.15 | 1.17 | 1.52 | 0    |
| Tmem225  | NA   | NA   | 3.67 | 3.96 | 1.9  |
| Tmem229a | NA   | NA   | NA   | 0.63 | NA   |
| Tmem229b | NA   | NA   | 0    | 0.15 | NA   |
| Tmem23   | 0.76 | NA   | NA   | NA   | NA   |
| Tmem230  | NA   | 1.36 | 3.24 | 4.77 | NA   |
| Tmem231  | NA   | 0.07 | 0.22 | 0    | NA   |
| Tmem232  | NA   | NA   | 1.44 | 0    | NA   |
| Tmem234  | NA   | NA   | 3.61 | 1.04 | NA   |
| Tmem236  | NA   | NA   | NA   | 2.26 | NA   |
| Tmem237  | NA   | NA   | 1.23 | 0.88 | NA   |
| Tmem238  | NA   | NA   | 0.84 | NA   | NA   |
| Tmem239  | NA   | NA   | 2.08 | 1.88 | NA   |
| Tmem24   | 0.53 | NA   | NA   | NA   | NA   |
| Tmem241  | NA   | NA   | 0.45 | 0    | NA   |
| Tmem242  | NA   | 0.94 | 1.6  | 0.94 | NA   |
| Tmem243  | NA   | 0    | 2.1  | 1.54 | NA   |
| Tmem245  | NA   | NA   | 1.41 | 1.28 | NA   |
| Tmem246  | NA   | 2.51 | 1.01 | 2.86 | NA   |
| Tmem247  | NA   | NA   | 2.59 | 0.64 | NA   |
| Tmem248  | NA   | 1.27 | 2.3  | 0.63 | NA   |
| Tmem25   | 3.73 | NA   | 3.38 | 0.91 | 0.68 |
| Tmem251  | NA   | NA   | NA   | 1.07 | NA   |
| Tmem252  | NA   | NA   | 2.99 | NA   | NA   |
| Tmem255a | NA   | 0.67 | 0    | 2.23 | NA   |
| Tmem255b | NA   | NA   | NA   | 2.92 | NA   |
| Tmem256  | NA   | NA   | 2.8  | 1.09 | NA   |
| Tmem258  | NA   | 1.19 | 1.34 | 0    | NA   |
| Tmem259  | NA   | 0.02 | 1.97 | 0.08 | NA   |
| Tmem26   | 0    | NA   | 3.11 | 1.46 | NA   |
| Tmem260  | NA   | 1.76 | 1.99 | 0.24 | NA   |
| Tmem27   | 0    | NA   | 1.03 | 1.69 | 0.75 |
| Tmem30a  | NA   | 0.3  | 0.93 | 1.08 | 1.75 |
| Tmem30b  | 2.28 | 0    | 0.66 | 0.81 | 3.03 |
| Tmem32   | 0.31 | NA   | NA   | NA   | NA   |
| Tmem33   | NA   | 0.82 | 1.28 | 0    | 1.2  |
| Tmem34   | 0.24 | NA   | NA   | NA   | NA   |
| Tmem35   | 0.72 | 0.08 | 2.81 | 0.59 | 0    |
| Tmem37   | NA   | NA   | 1.45 | 0.43 | 2.17 |

|         |      |      |      |      |      |
|---------|------|------|------|------|------|
| Tmem38a | NA   | NA   | 0    | NA   | 0    |
| Tmem38b | NA   | 0.88 | 0.55 | 0.04 | 4.28 |
| Tmem39a | NA   | 0.52 | 0.95 | 2.14 | 0.72 |
| Tmem39b | NA   | 2.59 | 0    | 2.58 | 4.6  |
| Tmem4   | 0.26 | NA   | NA   | NA   | NA   |
| Tmem40  | NA   | 1.43 | 1.07 | 0.83 | 0    |
| Tmem41a | NA   | NA   | 2.72 | 3.2  | 0    |
| Tmem41b | NA   | 0.85 | 2.1  | 0.7  | 0.03 |
| Tmem42  | NA   | NA   | 2.02 | NA   | 0    |
| Tmem43  | NA   | 0.29 | 1.46 | 0.5  | 0    |
| Tmem44  | NA   | NA   | 1.67 | 0.81 | 0    |
| Tmem45a | NA   | 0    | 4.96 | 1.55 | 3.28 |
| Tmem45b | NA   | NA   | 0.52 | 0.9  | 6.29 |
| Tmem47  | NA   | 0    | 0.32 | 2.31 | 1.84 |
| Tmem48  | NA   | NA   | NA   | NA   | 0    |
| Tmem49  | NA   | NA   | NA   | NA   | 0    |
| Tmem5   | 0.61 | 2.54 | 2.48 | NA   | 2.14 |
| Tmem50a | NA   | 1.44 | 2.08 | 1.27 | 0    |
| Tmem50b | NA   | 0    | 2.97 | 2.48 | 0    |
| Tmem51  | NA   | 1.63 | 0.49 | 2.14 | 4.11 |
| Tmem52  | NA   | NA   | 1.89 | 0.3  | 0    |
| Tmem52b | NA   | NA   | 2.05 | 0    | NA   |
| Tmem53  | NA   | 3.76 | 1.26 | 0    | 2.94 |
| Tmem54  | NA   | NA   | 0.88 | 0.57 | 1.57 |
| Tmem55a | NA   | NA   | 0.52 | 0    | 0    |
| Tmem55b | NA   | NA   | 1.26 | 0    | 0    |
| Tmem56  | NA   | NA   | 0.11 | 0.99 | 0.83 |
| Tmem57  | NA   | 0.51 | 1.4  | 0.19 | 1.2  |
| Tmem59  | NA   | 0    | 3.25 | 4.14 | 1.17 |
| Tmem59l | NA   | 1.71 | 2.69 | 1    | 2.15 |
| Tmem60  | NA   | NA   | 1.44 | 0.57 | 0    |
| Tmem61  | NA   | NA   | 0    | NA   | 5.4  |
| Tmem62  | NA   | 4.23 | 2.21 | 1.86 | 1.28 |
| Tmem63a | NA   | 1.02 | 1.49 | 1.02 | 1.65 |
| Tmem63b | NA   | NA   | 1.3  | 1.93 | NA   |
| Tmem63c | NA   | NA   | 5.12 | 0    | 2.14 |
| Tmem64  | NA   | NA   | 1.96 | 0    | 0.77 |
| Tmem65  | NA   | NA   | 0.82 | 1.22 | 0.28 |
| Tmem66  | NA   | 0    | 0.6  | 2.43 | 2.91 |
| Tmem67  | NA   | NA   | 0    | 1.19 | 0.8  |
| Tmem68  | NA   | NA   | 1.51 | 0.39 | 0    |

|         |      |      |      |      |      |
|---------|------|------|------|------|------|
| Tmem69  | NA   | NA   | 1.62 | 0.54 | 0    |
| Tmem70  | NA   | 0    | 0.3  | 1.5  | 5.94 |
| Tmem71  | NA   | NA   | 4.66 | 3.11 | 0.38 |
| Tmem72  | NA   | NA   | 1.87 | 0    | NA   |
| Tmem74  | NA   | NA   | 0.36 | 0    | NA   |
| Tmem74b | NA   | 0.61 | 1.79 | 4.63 | NA   |
| Tmem79  | NA   | NA   | 0.74 | 1.36 | 0    |
| Tmem8   | 0.75 | NA   | NA   | NA   | NA   |
| Tmem80  | NA   | 2.26 | 3.45 | 2.58 | 2.03 |
| Tmem81  | NA   | NA   | NA   | 0.16 | NA   |
| Tmem82  | NA   | NA   | NA   | 0.38 | NA   |
| Tmem85  | NA   | NA   | NA   | NA   | 0    |
| Tmem86a | NA   | NA   | 1.4  | NA   | 3.71 |
| Tmem86b | NA   | NA   | 1.32 | 1.63 | 1.06 |
| Tmem87a | NA   | 0.08 | 1.35 | 0.59 | 0.68 |
| Tmem87b | NA   | NA   | 0.73 | 0    | 1.45 |
| Tmem88  | NA   | NA   | 1.95 | NA   | 0    |
| Tmem89  | NA   | NA   | NA   | 0.63 | NA   |
| Tmem8b  | NA   | 0    | 9.13 | 1.53 | 0.6  |
| Tmem8c  | NA   | NA   | NA   | 0.38 | NA   |
| Tmem9   | 0    | NA   | 1.46 | 2.57 | 7.64 |
| Tmem90a | NA   | NA   | NA   | NA   | 0    |
| Tmem90b | NA   | NA   | NA   | NA   | 1.66 |
| Tmem91  | NA   | NA   | 2.34 | 1.81 | 0    |
| Tmem92  | NA   | NA   | NA   | 0    | NA   |
| Tmem93  | NA   | NA   | NA   | NA   | 0    |
| Tmem95  | NA   | NA   | NA   | 0    | NA   |
| Tmem97  | NA   | 0    | 2.7  | 0.69 | 1.05 |
| Tmem98  | NA   | NA   | 2.37 | 0    | 0    |
| Tmem9b  | NA   | 1.31 | 1.87 | 1    | 3.45 |
| Tmepai  | 0    | NA   | NA   | NA   | NA   |
| Tmfl    | NA   | 0.67 | 1.06 | 0    | 0.38 |
| Tmie    | 0.19 | NA   | 0.74 | 0    | NA   |
| Tmigd1  | NA   | NA   | NA   | 1.44 | NA   |
| Tmlhe   | 0.92 | 1.72 | 1.77 | 1.56 | 0.21 |
| Tmod1   | 0.73 | 2.21 | 0.6  | NA   | 1.24 |
| Tmod2   | 0.38 | 1.36 | 0.59 | 3.07 | 0.83 |
| Tmod3   | 0.2  | 1.14 | 0.64 | 1.93 | 0    |
| Tmod4   | 0.89 | NA   | 2.32 | NA   | 1.89 |
| Tmpit   | 0.21 | NA   | NA   | NA   | NA   |
| Tmpo    | 0.59 | 0.6  | 1.37 | 0    | 0    |

|           |      |      |      |       |      |
|-----------|------|------|------|-------|------|
| Tmprss11a | NA   | NA   | NA   | 2.16  | NA   |
| Tmprss11d | NA   | 1.29 | 2.85 | 1.21  | 0    |
| Tmprss11e | NA   | 1.61 | 0    | 1.84  | 1.05 |
| Tmprss11f | NA   | NA   | NA   | 5.03  | NA   |
| Tmprss12  | NA   | NA   | NA   | 0.15  | NA   |
| Tmprss13  | NA   | NA   | 0.12 | 3.07  | 3.38 |
| Tmprss15  | NA   | 1.32 | 1.78 | 0.5   | NA   |
| Tmprss2   | 2.4  | 0.59 | 0.13 | 1.07  | 1.48 |
| Tmprss3   | 0    | 1.02 | 1.89 | 1.11  | 0.9  |
| Tmprss4   | 0.61 | 0.83 | 0.83 | 1.26  | 0    |
| Tmprss5   | 4.2  | 0    | 0.15 | 0.6   | 0    |
| Tmprss6   | 0.68 | 0.15 | 0.09 | 1.73  | 2.22 |
| Tmprss7   | 0.37 | NA   | NA   | 0.14  | NA   |
| Tmprss9   | NA   | NA   | NA   | 1.25  | NA   |
| Tmsb10    | 1.06 | 1.67 | 0.06 | 0.25  | 0    |
| Tmsb15a   | NA   | 0    | 0.45 | 5.33  | 5.38 |
| Tmsb4x    | NA   | NA   | NA   | 0     | NA   |
| Tmtc1     | NA   | NA   | 0    | 2.27  | 1.02 |
| Tmtc2     | NA   | NA   | 1.82 | 13.93 | 0    |
| Tmtc3     | NA   | NA   | 1.38 | 0.59  | 0.41 |
| Tmtc4     | NA   | NA   | 1.2  | 1.28  | 1.69 |
| Tmub1     | NA   | NA   | 0.86 | 1.08  | 2.26 |
| Tmub2     | NA   | 0    | 5.37 | 0.13  | 0    |
| Tmx1      | NA   | 3.72 | 1.84 | 0.8   | 0    |
| Tmx2      | NA   | 0    | 0.72 | 0.59  | 0    |
| Tmx3      | NA   | NA   | 2.14 | 0.91  | 0    |
| Tmx4      | NA   | 0.53 | 1.87 | 0     | 0    |
| Tnc       | 0    | 1.2  | 1.37 | 0.12  | 0    |
| Tnf       | 0    | 0.46 | 1.04 | 1.41  | 0    |
| Tnfaip1   | 4.21 | 0.79 | 0.38 | 3.17  | 1.97 |
| Tnfaip2   | 0    | 2.07 | 1.12 | 2.63  | 0    |
| Tnfaip3   | 0.05 | 0.53 | 1.9  | 3.12  | 0    |
| Tnfaip6   | 0    | 0    | 2.03 | 1.21  | 0    |
| Tnfaip8   | 1.01 | 2.69 | 1.64 | 0     | 4.17 |
| Tnfaip8l1 | NA   | NA   | 1.66 | 0.05  | 0    |
| Tnfaip8l2 | NA   | NA   | 2.25 | 1.68  | 0    |
| Tnfaip8l3 | NA   | NA   | NA   | 0.06  | NA   |
| Tnfrsf10b | 0    | 0.7  | 0.88 | 0.59  | 0    |
| Tnfrsf11a | 0    | 1.19 | 1.05 | 0.85  | 2.76 |
| Tnfrsf11b | 1.13 | 0.62 | 0.82 | 1.57  | 1.5  |
| Tnfrsf12a | 0.85 | 0.76 | 0.83 | 3.7   | 1.79 |



|           |      |      |      |      |      |
|-----------|------|------|------|------|------|
| Tnfrsf13b | 1.7  | 1.38 | 3.03 | 0.95 | 0.65 |
| Tnfrsf13c | 0.24 | NA   | 2.21 | 0    | NA   |
| Tnfrsf14  | 1.61 | 1.26 | 3.53 | 1.02 | 1.23 |
| Tnfrsf17  | 8.91 | 1.06 | 2.76 | 0.72 | 1.14 |
| Tnfrsf18  | 1.59 | NA   | 0.26 | 0.93 | 0    |
| Tnfrsf19  | 2.95 | NA   | 0.69 | 0    | 0    |
| Tnfrsf19l | 0.22 | NA   | NA   | NA   | NA   |
| Tnfrsf1a  | 0.18 | 1.11 | 1.76 | 3.68 | 0    |
| Tnfrsf1b  | 0.21 | 2.48 | 0.96 | 1.51 | 0.48 |
| Tnfrsf21  | 1    | 2.26 | 3.05 | 1.14 | 2.52 |
| Tnfrsf25  | 0.66 | 0    | 1.17 | NA   | 0    |
| Tnfrsf4   | 0    | 0.84 | 0.06 | 2.34 | 0    |
| Tnfrsf8   | 0.42 | 2.34 | 1.32 | 0.97 | 0.4  |
| Tnfrsf9   | 0.04 | 0.73 | 1.31 | 0.08 | 0    |
| Tnfsf10   | 0.42 | 1.85 | 1.64 | 0    | 0.05 |
| Tnfsf11   | 0.45 | 1.03 | 1.03 | 2.35 | 0.87 |
| Tnfsf12   | 0    | NA   | NA   | NA   | NA   |
| Tnfsf13   | 0    | NA   | NA   | NA   | NA   |
| Tnfsf13b  | 0.67 | NA   | 0.92 | 0    | 0    |
| Tnfsf14   | 0    | 0.15 | 2.96 | 0.81 | 0    |
| Tnfsf15   | 0.47 | NA   | NA   | 1.82 | NA   |
| Tnfsf18   | 0.42 | NA   | NA   | 2.59 | NA   |
| Tnfsf4    | 1.78 | 1.57 | 2.23 | 1.74 | 0.34 |
| Tnfsf5ip1 | 2.25 | NA   | NA   | NA   | NA   |
| Tnfsf8    | 2.25 | 0.01 | 0.53 | 2.06 | 0    |
| Tnfsf9    | 0    | 1.46 | 0.83 | 0.86 | 7.61 |
| Tnik      | 0    | 0    | 0.8  | 0    | 1.28 |
| Tnip1     | 0    | 2.98 | 1.79 | 7.1  | 0    |
| Tnip2     | 0    | 0.05 | 1.14 | 0.36 | 0    |
| Tnip3     | NA   | NA   | NA   | 1.04 | NA   |
| Tnk1      | 1.13 | 0    | 0    | 1.35 | 0.63 |
| Tnk2      | 0    | 1.47 | 1.24 | 0.58 | 0    |
| Tnks      | 0    | 0.04 | 0.53 | 0    | 0.92 |
| Tnks1bp1  | 0    | NA   | 1.84 | 2.23 | 0    |
| Tnks2     | NA   | 0.28 | 1.13 | 3.9  | 0.48 |
| Tnmd      | 4.26 | 1.94 | 2.62 | 3.5  | 8.19 |
| Tnn       | 2.22 | 0    | 0.95 | 1.64 | 6.67 |
| Tnnc1     | 1.54 | 1.19 | 5.11 | 0    | 1.82 |
| Tnnc2     | 0    | 0.64 | 0.24 | 0.68 | 2.69 |
| Tnni1     | 1.03 | 2.44 | 4.01 | 0.95 | 5.14 |
| Tnni2     | 0.7  | 0.78 | 2.08 | 1.43 | 3.24 |

|         |      |      |      |      |      |
|---------|------|------|------|------|------|
| Tnni3   | NA   | 1.08 | 0    | 0.67 | 0    |
| Tnni3k  | 0    | 1.47 | 0    | NA   | 1.75 |
| Tnnt1   | 3.15 | 2.44 | 1.51 | 0.27 | 1.33 |
| Tnnt2   | 0.9  | 0    | 0.76 | 1.86 | 0    |
| Tnnt3   | 0.9  | 0.74 | 1.44 | 0.67 | 0    |
| Tnp1    | 0    | 0.78 | 0.75 | 1.89 | 0    |
| Tnp2    | 1.99 | 0.95 | 1.07 | 1.35 | 0    |
| Tnpo1   | 0    | 1.14 | 1.89 | 0    | 0    |
| Tnpo2   | 1.92 | 0    | 0.89 | 2.61 | 0    |
| Tnpo3   | 1.34 | 0.25 | 0.99 | 0    | 0    |
| Tnr     | 0    | 1.4  | 0.98 | 0.1  | 2.49 |
| Tnrc15  | 0    | NA   | NA   | NA   | NA   |
| Tnrc18  | NA   | NA   | 1.45 | 0.85 | 0.79 |
| Tnrc4   | 0.36 | NA   | NA   | NA   | NA   |
| Tnrc6a  | NA   | NA   | 1.7  | 5.71 | 0    |
| Tnrc6b  | NA   | 0.04 | 1.08 | 3    | 1.14 |
| Tnrc6c  | NA   | NA   | 1.77 | 1.45 | 0    |
| Tnrc9   | 5.23 | NA   | NA   | NA   | NA   |
| Tns1    | NA   | 1.58 | 3.4  | 0    | 0    |
| Tns3    | NA   | 1.38 | 1.12 | 0    | 0    |
| Tns4    | NA   | 1.56 | 0.54 | 0.03 | 3.68 |
| Tnxb    | 0.3  | 0.56 | 0.89 | 0.35 | 4.31 |
| Tob1    | 0    | 0    | 0.63 | 0.13 | 2.62 |
| Tob2    | 1.07 | 1.08 | 0.68 | 1.35 | 0    |
| Toe1    | NA   | 1.77 | 2.99 | 0.16 | 2.25 |
| Tollip  | 3.53 | 0.41 | 0.66 | 0    | 0.03 |
| Tom1    | 0.36 | 0    | 2.55 | 2.09 | 3.19 |
| Tom1l1  | NA   | 1.83 | 0.56 | 0    | 0    |
| Tom1l2  | 0    | 0.94 | 1.2  | 0    | 0.11 |
| Tomm20  | 3.4  | 2.13 | 1.11 | 0.64 | 0    |
| Tomm20l | NA   | NA   | NA   | 0    | NA   |
| Tomm22  | 0.34 | 1.1  | 0    | 0.24 | 0    |
| Tomm34  | 0.51 | 0    | 0.02 | 0.4  | 0    |
| Tomm40  | 0    | 2.24 | 1.61 | 2.04 | 0.12 |
| Tomm40l | NA   | NA   | 0.51 | 0.97 | 1.51 |
| Tomm5   | NA   | NA   | 1.54 | 2.64 | 0    |
| Tomm6   | NA   | NA   | NA   | 0.59 | NA   |
| Tomm7   | 0.69 | NA   | NA   | NA   | NA   |
| Tomm70a | 0    | 1.36 | 1.36 | 4.45 | 0    |
| Tonsl   | NA   | 3.5  | 3.03 | 3.39 | NA   |
| Top1    | 0.41 | 0    | 1.01 | 0.3  | 0    |

|          |      |      |      |      |      |
|----------|------|------|------|------|------|
| Top1mt   | 0    | NA   | 0.52 | 2.58 | 0    |
| Top2a    | 0.52 | 0.38 | 0.87 | 0.36 | 0    |
| Top2b    | 0.68 | 0.02 | 0.86 | 0.41 | 0    |
| Top3a    | 0.95 | 0.39 | 1.53 | 0.33 | NA   |
| Top3b    | 0    | 0.45 | 1.16 | 0    | NA   |
| Topaz1   | NA   | NA   | NA   | 2.37 | NA   |
| Topbp1   | 0    | 0.47 | 1.96 | 0.73 | 4    |
| Topors   | 0.31 | 0.61 | 1.74 | 3.41 | 0    |
| Tor1a    | NA   | 0.02 | 1.91 | 0.33 | 3.95 |
| Tor1aip1 | NA   | 0.6  | 1.19 | 1.7  | 0    |
| Tor1aip2 | NA   | NA   | 0.53 | 0.02 | 0.4  |
| Tor1b    | 1.25 | 0.54 | 0.68 | 0.08 | 2.58 |
| Tor2a    | 0    | NA   | 0.71 | 4.05 | 0    |
| Tor3a    | 0.8  | 2.7  | 1.8  | 1.56 | 2.78 |
| Tor4a    | NA   | 2.89 | 1.48 | 0.95 | NA   |
| Tox      | 1.34 | 0    | 0.79 | 0.64 | 2.61 |
| Tox2     | NA   | NA   | 3.18 | 1.54 | 0    |
| Tox3     | NA   | 1.48 | 3.14 | 0.23 | 1.55 |
| Tox4     | NA   | 0.69 | 1.5  | 1.18 | 0    |
| Tp53i11  | 0.88 | NA   | NA   | NA   | NA   |
| Tpbg     | 0.77 | 0.97 | 0.42 | 1.76 | 1.22 |
| Tpen1    | 0.32 | 0    | 1.1  | 1.39 | 0    |
| Tpcn2    | 0.83 | NA   | 0.63 | 0    | 0.19 |
| Tpd52    | 1.26 | 2.46 | 1.83 | 0.83 | 2.52 |
| Tpd52i1  | 0.66 | 0    | 0    | 0.08 | 0    |
| Tpd52i2  | 0.03 | 1.02 | 0.31 | 0.88 | 0.68 |
| Tpgs1    | NA   | NA   | 1.2  | 0.18 | NA   |
| Tpgs2    | NA   | 0.47 | 0.2  | 0    | NA   |
| Tph1     | 1.84 | 1.03 | 0.55 | 0    | 0    |
| Tph2     | 0.94 | NA   | 3.07 | 0.23 | NA   |
| Tpi1     | 0.69 | 1.87 | 0.33 | 1.7  | 0    |
| Tpk1     | 0.04 | 2.22 | 2.17 | 2.54 | 5.38 |
| Tpm1     | 0.26 | 1.48 | 0.54 | 0.61 | 0.86 |
| Tpm2     | 0    | 0.32 | 0.57 | 1.29 | 0.52 |
| Tpm3     | 0    | 1.43 | 0.34 | 0.56 | 0.6  |
| Tpm4     | 0.08 | 1.73 | 2.3  | 0.75 | 0    |
| Tpmt     | 0.02 | 0    | 1.04 | 0.6  | 0.4  |
| Tpo      | 0.97 | 1.43 | 2.05 | 1.07 | 0    |
| Tpp1     | NA   | 0.72 | 3.5  | 5.77 | 0.12 |
| Tpp2     | 0    | 0    | 1.53 | 0.86 | 3.75 |
| Tppp     | NA   | 4.94 | 0.42 | 2.32 | 3.05 |

|          |      |      |      |      |      |
|----------|------|------|------|------|------|
| Tppp2    | NA   | NA   | NA   | 0.7  | NA   |
| Tppp3    | NA   | 1.16 | 0    | 1.82 | 2.73 |
| Tpr      | 1.81 | 0.56 | 1.37 | 0    | 1.1  |
| Tpra1    | NA   | 3.64 | 1.44 | 1.46 | 4.19 |
| Tprkb    | NA   | 0.52 | 2.02 | 0.97 | 2.15 |
| Tprn     | NA   | NA   | 2.82 | 1.59 | NA   |
| Tpsab1   | NA   | NA   | NA   | NA   | 6.64 |
| Tpsb2    | NA   | 0.94 | 0.69 | 0.76 | 0    |
| Tpsg1    | 5.36 | 2.99 | 0.18 | NA   | 7.02 |
| Tpst1    | 0.41 | 0.04 | 1.78 | 1.26 | 0    |
| Tpst2    | 0    | 0    | 0.42 | 2.84 | 0    |
| Tpt1     | 0.04 | 0.7  | 2.62 | 0    | 0    |
| Tpte     | 0    | 1.48 | 1.51 | 1.22 | 4.22 |
| Tpx2     | 0.27 | 0.38 | 1.32 | 0.29 | 0    |
| Tra2a    | NA   | 0.66 | 0.61 | 0.04 | 0.36 |
| Tra2b    | NA   | 0.82 | 0.67 | 0.07 | 1.01 |
| Trabd    | NA   | 1.87 | 0.57 | 0.76 | 2.3  |
| Trabd2b  | NA   | NA   | 0.98 | 0.94 | NA   |
| Tradd    | 0.61 | 0    | 0.93 | 1.32 | 0.19 |
| Traf1    | 0.15 | 2.55 | 1.19 | 1.68 | 2.48 |
| Traf2    | 3.47 | 2.67 | 0.21 | 0.91 | 0    |
| Traf3    | 0.84 | 1.22 | 0.1  | 2.49 | 0    |
| Traf3ip1 | 0.22 | 3.67 | 0.92 | 1.15 | 0.85 |
| Traf3ip2 | NA   | 0.03 | 2.85 | 0    | 1.48 |
| Traf3ip3 | NA   | 0    | 2.75 | 0    | 2.39 |
| Traf4    | 1.46 | 0    | 1.54 | 1.49 | 0.2  |
| Traf5    | 0.62 | 0    | 0.42 | 0    | 0    |
| Traf6    | 0    | 0.26 | 0.89 | 1.31 | 0.06 |
| Traf7    | 3.39 | NA   | 2.42 | 1.23 | 1.64 |
| Trafd1   | NA   | 0.89 | 0.83 | 0.81 | 0    |
| Traip    | 3.95 | 0.06 | 2.07 | 0    | 0.82 |
| Trak1    | NA   | 0.76 | 0.73 | 1.21 | 0.03 |
| Trak2    | NA   | 0.98 | 0.43 | 4.5  | 4.05 |
| Tram1    | 0.05 | 1.09 | 2.06 | 1.55 | 0    |
| Tram1l1  | 0.06 | NA   | 1.15 | 3.06 | 0    |
| Tram2    | 0    | 0    | 0.97 | 1.19 | 0    |
| Trank1   | NA   | 0    | 2.44 | 6.25 | NA   |
| Trap1    | 0.41 | 1.72 | 1.22 | 0    | 0.35 |
| Trappc1  | NA   | NA   | 2.28 | 5.23 | 1.17 |
| Trappc10 | NA   | 0    | 2.18 | 0    | 3.43 |
| Trappc11 | NA   | 0    | 1.84 | 0    | NA   |

|          |      |      |      |      |      |
|----------|------|------|------|------|------|
| Trappc12 | NA   | 0    | 0.86 | 0.23 | NA   |
| Trappc13 | NA   | 0.67 | 1.05 | 0.6  | NA   |
| Trappc2  | 0.4  | 0    | 2.25 | 0.48 | 3.35 |
| Trappc21 | NA   | 0.58 | 2.15 | 0.42 | 0.92 |
| Trappc3  | 0.66 | 0    | 1.2  | 1.28 | 2.96 |
| Trappc31 | NA   | NA   | NA   | 8.25 | NA   |
| Trappc4  | 0.81 | 1.29 | 0.51 | 0.28 | 2.5  |
| Trappc5  | NA   | NA   | 0.54 | 0.78 | 1.8  |
| Trappc6a | NA   | 0    | 1.3  | 0.92 | 0    |
| Trappc6b | 0.44 | NA   | 2.29 | 1.11 | 1.44 |
| Trappc8  | NA   | 0.53 | 0.59 | 5.76 | NA   |
| Trappc9  | NA   | 0.14 | 1.38 | 0    | 0    |
| Trat1    | NA   | 0.21 | 3.3  | 1.04 | 0    |
| Trdmt1   | NA   | 0.2  | 0.91 | 0.39 | 2.91 |
| Trdn     | 0.54 | 1.1  | 0.48 | 0.8  | 0    |
| Treh     | 0.98 | 1.95 | 0.27 | 1.35 | 5.57 |
| Trem1    | 0.72 | 4.21 | 0.09 | 1.64 | 0    |
| Trem2    | 0.64 | 0.6  | 0.32 | 1.34 | 2.19 |
| Trem11   | 1.33 | NA   | 1.49 | 0.43 | NA   |
| Trem12   | NA   | 0    | 1.07 | 1.11 | 0    |
| Trem14   | 0.16 | NA   | 3.54 | 2.05 | NA   |
| Trerf1   | 0.14 | NA   | NA   | 0.92 | NA   |
| Trex1    | 0.41 | NA   | NA   | NA   | 0.19 |
| Trex2    | 3.84 | 1.47 | 2.25 | 0.89 | 0    |
| Trfp     | 0.85 | NA   | NA   | NA   | NA   |
| Trh      | 0    | 1.74 | 2.45 | 2.92 | 0    |
| Trhde    | 1.3  | 0.97 | 1.67 | NA   | 2.15 |
| Trhr     | 1.84 | 1.13 | 0.57 | 1.22 | 0    |
| Triad3   | 0.39 | NA   | NA   | NA   | NA   |
| Triap1   | NA   | 1.95 | 0.57 | 2.13 | 0    |
| Trib1    | 0.22 | 0.14 | 0    | 1.5  | 0    |
| Trib2    | 2.23 | 0    | 0    | 0    | 1.87 |
| Trib3    | 1.5  | 1.18 | 2.24 | 0    | 0.66 |
| Tril     | NA   | 0.82 | 0.53 | 1.04 | NA   |
| Trim10   | 0.48 | 2.47 | 0.85 | 0    | 4.52 |
| Trim11   | 0.84 | NA   | 1.59 | 1.41 | 0    |
| Trim13   | 2.13 | 2.4  | 2.5  | NA   | 4.22 |
| Trim14   | 0.82 | 0.62 | 1.55 | 2.19 | 0    |
| Trim15   | 0.21 | 2.03 | 2.71 | 3.89 | 0    |
| Trim16   | 0.99 | 0.86 | 2.89 | 0.82 | 1.58 |
| Trim17   | 0.59 | 1.49 | 0.91 | NA   | 6.35 |

|         |      |      |      |      |       |
|---------|------|------|------|------|-------|
| Trim2   | 0.74 | 0.05 | 1.4  | 1.52 | 1.08  |
| Trim21  | 0    | 0    | 0    | 0    | 0     |
| Trim23  | 0.07 | 1.15 | 0.99 | 0.89 | 1.01  |
| Trim24  | 1.08 | 0.35 | 1.02 | 0    | 2.22  |
| Trim25  | 0.84 | 0    | 1.43 | 0    | 0     |
| Trim26  | 0.64 | 0.1  | 1.08 | 0    | 0.4   |
| Trim27  | 0.34 | 1.4  | 0.75 | 0.71 | 1.02  |
| Trim28  | 0.35 | 0    | 1.04 | 3.14 | 0     |
| Trim29  | 0.06 | 1    | 1.38 | 0.68 | 15.12 |
| Trim3   | 1.33 | 1.01 | 2.73 | 2.73 | 6.49  |
| Trim31  | 0.06 | 1.59 | 1.4  | 1.65 | 3.7   |
| Trim32  | 0    | 0    | 1.56 | 1.43 | 0     |
| Trim33  | 0.71 | 0.97 | 0    | 0    | 1.41  |
| Trim34  | 0.57 | NA   | NA   | NA   | NA    |
| Trim35  | 0    | NA   | 1.51 | 4.69 | 3.72  |
| Trim36  | 0.36 | 2.1  | 0.1  | 0    | 2.29  |
| Trim37  | 0    | 1.18 | 1.98 | 0.87 | 1.49  |
| Trim38  | NA   | NA   | NA   | 4.96 | NA    |
| Trim39  | 0.36 | NA   | 2.41 | NA   | 0.89  |
| Trim40  | NA   | NA   | 2.24 | 0.57 | NA    |
| Trim41  | 0.33 | NA   | 1.31 | 0.44 | 0     |
| Trim42  | 2.79 | NA   | 0.9  | 0.8  | NA    |
| Trim43b | NA   | NA   | NA   | 0.44 | NA    |
| Trim44  | 0.05 | 0    | 2.95 | 0.93 | 2.53  |
| Trim45  | 0.38 | 1.13 | 0.9  | 1.5  | 0     |
| Trim46  | 0    | 1.2  | 1.48 | 1.84 | 8.97  |
| Trim47  | 0.02 | NA   | 2.82 | 1.09 | 0.89  |
| Trim5   | NA   | 1.1  | 2.39 | 3    | 1.25  |
| Trim50  | 1.99 | NA   | NA   | 0.45 | NA    |
| Trim52  | NA   | NA   | NA   | 0.36 | NA    |
| Trim54  | NA   | NA   | 1.05 | 1.35 | 5.27  |
| Trim55  | NA   | NA   | NA   | 0.99 | NA    |
| Trim56  | 0.35 | NA   | 2.11 | 0.51 | NA    |
| Trim59  | 1.91 | NA   | 1.97 | 0    | 0     |
| Trim6   | 0.44 | NA   | 0.34 | NA   | 0.97  |
| Trim61  | NA   | NA   | 0.74 | 2.24 | 2.75  |
| Trim62  | NA   | 0    | 1.47 | 0.29 | 1.2   |
| Trim63  | NA   | NA   | 0.55 | 0.99 | 2.72  |
| Trim65  | NA   | NA   | 2.02 | 0    | 1.27  |
| Trim66  | NA   | 1.64 | 0.42 | 1.27 | 0     |
| Trim67  | NA   | NA   | 1.25 | 1.1  | 1.67  |

|          |      |      |      |      |      |
|----------|------|------|------|------|------|
| Trim68   | NA   | 0    | 0.12 | 0.25 | 2.84 |
| Trim69   | NA   | NA   | 0.96 | 0    | 0    |
| Trim7    | 1.43 | NA   | 1.1  | 2.77 | 0.7  |
| Trim71   | NA   | NA   | NA   | 2.05 | NA   |
| Trim72   | NA   | NA   | 1.47 | 0.17 | NA   |
| Trim8    | 0.11 | 0    | 0.95 | 1.67 | 0    |
| Trim9    | 0.66 | 1.38 | 1.3  | 1.62 | 0.71 |
| Triml1   | NA   | NA   | 2.27 | 1.23 | NA   |
| Triml2   | NA   | NA   | NA   | 1.72 | NA   |
| Trio     | 6.23 | 0.42 | 0.71 | 0    | 0.11 |
| Triobp   | 0.79 | 2.73 | 1.02 | 0    | 0    |
| Trip10   | 0    | 1.51 | 1.57 | 2.46 | 3.28 |
| Trip11   | NA   | 0    | 0.26 | 1.29 | 0.49 |
| Trip12   | 0.15 | 0.63 | 1.52 | 0.83 | 0    |
| Trip13   | 0    | 0.68 | 1.93 | 0.77 | 0.09 |
| Trip4    | 0.69 | 1.96 | 1.67 | 0.1  | 2.37 |
| Trip6    | 6.89 | 0    | 1.38 | 2.32 | 6.79 |
| Triqk    | NA   | NA   | 0    | NA   | NA   |
| Trit1    | 5.16 | 0    | 1.15 | 0.77 | 0    |
| Trmt1    | 0    | 0.33 | 0.24 | 1.79 | 1.02 |
| Trmt10a  | NA   | NA   | 1.05 | 0.74 | NA   |
| Trmt10b  | NA   | NA   | 0.71 | 1.37 | NA   |
| Trmt10c  | NA   | NA   | 1.82 | 0.79 | NA   |
| Trmt11   | NA   | 0    | 1.56 | 0.91 | 2    |
| Trmt112  | NA   | 0.1  | 1.82 | 0    | 0    |
| Trmt12   | NA   | 1.59 | 1.74 | 0.02 | 4.12 |
| Trmt13   | NA   | 0.71 | 0.9  | 0    | NA   |
| Trmt1l   | NA   | 1.29 | 0.75 | 0.77 | NA   |
| Trmt2a   | NA   | 0.07 | 0.02 | 0.28 | 0    |
| Trmt2b   | NA   | 0    | 1.15 | 0    | 1.31 |
| Trmt44   | NA   | 0.65 | 1.55 | 1.44 | NA   |
| Trmt5    | NA   | 0    | 0.47 | 0.23 | 3.64 |
| Trmt6    | NA   | NA   | 0.93 | 1.12 | 0    |
| Trmt61a  | NA   | 1.36 | 1.08 | 3.19 | 0    |
| Trmt61b  | NA   | 1.98 | 2.32 | 0.47 | 3.59 |
| Trmu     | NA   | 1.13 | 1.29 | 2.38 | 2.19 |
| Trnau1ap | NA   | 0    | 2.07 | 0.32 | 0.85 |
| Trnp1    | NA   | NA   | 0.01 | 0.54 | 1.36 |
| Trnt1    | 0.99 | NA   | 3.25 | 0.42 | 1.42 |
| Tro      | 0.41 | 1.16 | 2.4  | 0    | 3.83 |
| Troap    | 1.55 | 1.7  | 2.53 | 0    | 0    |

|         |      |      |      |      |      |
|---------|------|------|------|------|------|
| Trove2  | NA   | 1.5  | 0.93 | 0.79 | 0    |
| Trpa1   | NA   | 0.01 | 0.46 | 1.52 | 5.35 |
| Trpc1   | 2.24 | 1.21 | 1.22 | 0.62 | 0.8  |
| Trpc2   | NA   | 1.35 | 1.14 | 1.11 | 0    |
| Trpc3   | 3.58 | 0    | 1.04 | 0.06 | 1.54 |
| Trpc4   | 0.49 | 1.02 | 1.93 | 0.09 | 1.03 |
| Trpc4ap | 0.14 | 1.31 | 1.57 | 0    | 1.45 |
| Trpc5   | 3.18 | 2.05 | 0.87 | 2.46 | 2    |
| Trpc6   | 0.27 | 1.38 | 2    | 0.46 | 0    |
| Trpc7   | 1.64 | 1.94 | 0    | 2.76 | 0    |
| Trpm1   | 0.12 | 0.5  | 0.78 | 0.34 | 2.3  |
| Trpm2   | 3    | 0    | 1.13 | 1.39 | 0    |
| Trpm3   | 0.52 | 0.22 | 0.22 | 0.42 | 0    |
| Trpm4   | 0.85 | 2.25 | 1.32 | 0.12 | 1.18 |
| Trpm5   | 0.3  | NA   | 1.3  | 0    | 1.97 |
| Trpm6   | 9.69 | 0.52 | 0.77 | 4.11 | 0    |
| Trpm7   | 1.32 | NA   | 1.99 | 0.35 | 0.38 |
| Trpm8   | 3.39 | 0.3  | 0.61 | 1.99 | 0    |
| Trps1   | 1    | 0.13 | 0.03 | 1.86 | 0.58 |
| Trpt1   | NA   | NA   | 2.8  | 1.21 | 2.05 |
| Trpv1   | NA   | 2.46 | 0    | NA   | 2.53 |
| Trpv2   | 0.27 | 1.59 | 3.01 | 1.34 | 0    |
| Trpv3   | 2.29 | NA   | NA   | 2.63 | NA   |
| Trpv4   | 0.65 | 2.46 | 2.13 | 0.77 | 5.43 |
| Trpv5   | 0.1  | NA   | NA   | 0    | NA   |
| Trpv6   | 2.62 | 0.26 | 1.42 | 0.75 | 0    |
| Trrap   | NA   | 0    | 0.82 | 0    | 1.75 |
| Trub1   | NA   | NA   | 0.86 | 1.09 | 0.54 |
| Trub2   | NA   | NA   | 0.94 | NA   | 0    |
| Tsacc   | NA   | NA   | 3.76 | 3.26 | NA   |
| Tsc1    | 0.43 | 0    | 1.89 | 0    | 2.45 |
| Tsc2    | 0    | 1.06 | 1.93 | 0.89 | 2.96 |
| Tsc22d1 | NA   | 0.51 | 0.27 | 1.75 | 0.56 |
| Tsc22d2 | NA   | 0.76 | 0.83 | 3.04 | 1.75 |
| Tsc22d3 | NA   | 0    | 0.94 | 1.75 | 3.32 |
| Tsc22d4 | NA   | 1.42 | 2.91 | 1.78 | 4.44 |
| Tscot   | 1.04 | NA   | NA   | NA   | NA   |
| Tsen15  | NA   | NA   | 1.25 | 0.15 | 0    |
| Tsen2   | NA   | 0.9  | 0    | 1.99 | 0.29 |
| Tsen34  | NA   | 0.08 | 1.01 | 0.73 | 0    |
| Tsen54  | NA   | NA   | 1.56 | 1.15 | 0    |



|          |      |      |      |      |      |
|----------|------|------|------|------|------|
| Tsfm     | NA   | 0.82 | 1.28 | 1.16 | 1.15 |
| Tsg101   | 1.26 | 3.86 | 2    | 1.6  | 0    |
| Tsga10   | 0.6  | 0.88 | 1.76 | 1.34 | 0    |
| Tsga10ip | 0.43 | NA   | NA   | NA   | NA   |
| Tsga13   | 0.52 | NA   | 2.58 | 0.79 | NA   |
| Tsga14   | 0.37 | NA   | NA   | NA   | 1.28 |
| Tsga2    | 0.71 | NA   | NA   | NA   | NA   |
| Tshb     | 6.66 | 2.09 | 1.43 | 0.98 | 0    |
| Tshr     | 0    | 0.59 | 0.83 | 0    | 1.5  |
| Tshz1    | NA   | NA   | 0.44 | 1.97 | 0    |
| Tshz2    | NA   | 1.1  | 0.76 | 1.48 | 0.65 |
| Tshz3    | NA   | NA   | 0.26 | 0.23 | 2.84 |
| Tsix     | NA   | NA   | 3.29 | NA   | 3.12 |
| Tsks     | NA   | 1    | 0.4  | 0.99 | 0    |
| Tsku     | NA   | 1.09 | 1.77 | 1.5  | 0    |
| Tslp     | 1.1  | NA   | 3.3  | 0.43 | 1.27 |
| Tsn      | 0.62 | 0.48 | 0.19 | 0.46 | 0    |
| Tsnax    | 0.21 | 0.79 | 0.75 | NA   | 0    |
| Tsnaxip1 | 0.82 | 2.07 | 0    | 1.92 | 0    |
| Tsp50    | 3.46 | NA   | NA   | NA   | NA   |
| Tspan1   | NA   | 1.35 | 0.11 | 0.34 | 0    |
| Tspan10  | NA   | NA   | 1.95 | 1.58 | 4.37 |
| Tspan11  | NA   | NA   | 0.34 | 0    | 0.53 |
| Tspan12  | NA   | 2.14 | 2.55 | 1.44 | 1.25 |
| Tspan13  | NA   | 1.66 | 0.79 | 1.86 | 0    |
| Tspan14  | NA   | 1.52 | 2.18 | 0    | 1.31 |
| Tspan15  | NA   | 1.71 | 1.97 | 1.68 | 3.5  |
| Tspan17  | NA   | NA   | 2.76 | 1.66 | 1.59 |
| Tspan18  | NA   | NA   | 0.39 | 1.82 | 0.53 |
| Tspan2   | NA   | 2.38 | 0.05 | 1.22 | 1.46 |
| Tspan3   | NA   | 2.14 | 2.88 | 0.27 | 0    |
| Tspan31  | NA   | 0.66 | 1.71 | 0.72 | 0    |
| Tspan32  | NA   | 0.04 | 3.14 | 2.33 | 2.29 |
| Tspan33  | NA   | NA   | 1.8  | 1.69 | 0.02 |
| Tspan4   | NA   | 0    | 2.21 | 2.27 | 0    |
| Tspan5   | NA   | 1.73 | 0.69 | 0.44 | 2.66 |
| Tspan6   | NA   | 0.16 | 0.58 | 0.17 | 0.57 |
| Tspan7   | NA   | 0.58 | 0.15 | 1.21 | 2.13 |
| Tspan8   | NA   | 1.36 | 1.16 | 1.15 | 1.33 |
| Tspan9   | NA   | 1.86 | 1.44 | 6.7  | 0.52 |
| Tspear   | NA   | NA   | NA   | 0.73 | NA   |

|        |      |      |      |      |      |
|--------|------|------|------|------|------|
| Tspo   | NA   | 0    | 0.46 | 0.92 | 0    |
| Tspo2  | NA   | 1.42 | 1.17 | 0.91 | NA   |
| Tspyl1 | 0.04 | 0    | 0.45 | 0.47 | 0    |
| Tspyl2 | NA   | 1.39 | 1.96 | 0.1  | 0    |
| Tspyl3 | NA   | NA   | NA   | NA   | 1.09 |
| Tspyl4 | NA   | 0.08 | 1.89 | 0.94 | 0    |
| Tspyl5 | 4.44 | 6.15 | 1.31 | 1.42 | 0    |
| Tsr1   | NA   | 1.44 | 0.43 | NA   | 0.77 |
| Tsr2   | NA   | 2.43 | 0.77 | 1.39 | 1.61 |
| Tsr3   | NA   | 0    | 1.86 | 0.54 | NA   |
| Tsrc1  | 0.21 | NA   | NA   | NA   | NA   |
| Tssc1  | 0    | 1.33 | 0.2  | 0.33 | 0.19 |
| Tssc4  | 0    | 3.02 | 4.54 | 0.63 | 0    |
| Tssk2  | NA   | 0.81 | 2.19 | 0.43 | 0    |
| Tssk3  | NA   | NA   | 0.74 | 0.42 | 1.57 |
| Tssk4  | NA   | NA   | 0.02 | 1.1  | 1.2  |
| Tssk6  | NA   | NA   | 1.02 | 0.59 | 0    |
| Tst    | 1.05 | 0.52 | 1.16 | 0.77 | 2.02 |
| Tsta3  | 0.08 | 1.9  | 0.71 | 0.97 | 1.4  |
| Tstd1  | NA   | NA   | 0    | NA   | 1.78 |
| Tstd2  | NA   | 2.64 | 0.95 | 0.92 | 0    |
| Ttbk1  | 0    | NA   | 0    | 0.89 | 1.63 |
| Ttbk2  | NA   | 1.69 | 0.23 | 0.17 | 0.13 |
| Ttc1   | 0.69 | 1.22 | 0.66 | 0.48 | 4.59 |
| Ttc12  | 0    | 1.82 | 1.31 | 0    | 2.2  |
| Ttc13  | 0.48 | 1.4  | 0.91 | 0.99 | 2.18 |
| Ttc14  | 0.12 | NA   | 0.62 | 0.31 | 1.06 |
| Ttc15  | 0    | NA   | NA   | NA   | 1.93 |
| Ttc16  | 0.24 | NA   | 0.64 | 0.07 | 0    |
| Ttc17  | 1.01 | 1.94 | 1.08 | 0    | 0    |
| Ttc18  | 0.26 | 1.14 | 0.7  | 0.03 | 2.2  |
| Ttc19  | 0.37 | 0.67 | 1.12 | 0.52 | 3.9  |
| Ttc21a | NA   | NA   | 0.76 | 0    | 0.18 |
| Ttc21b | NA   | 0.32 | 3.55 | 1.06 | 1.84 |
| Ttc22  | NA   | 0.28 | 0.71 | 2.54 | 0    |
| Ttc23  | NA   | 0    | 1.15 | 0.59 | 0    |
| Ttc23l | NA   | NA   | 2.34 | 1.31 | 0    |
| Ttc24  | NA   | NA   | NA   | 0.82 | NA   |
| Ttc25  | NA   | NA   | 3    | 0.23 | 7.42 |
| Ttc26  | NA   | 1.22 | 2.28 | 0.63 | 5.1  |
| Ttc27  | NA   | 0    | 1.27 | 0.74 | 0.93 |

|        |      |      |       |      |      |
|--------|------|------|-------|------|------|
| Ttc28  | NA   | 0    | 0.73  | 0.98 | 0.25 |
| Ttc29  | NA   | NA   | 2.55  | 0.92 | 0    |
| Ttc3   | 0.19 | 0    | 1.1   | 2.05 | 0    |
| Ttc30b | NA   | NA   | 0.99  | 2.47 | 2.46 |
| Ttc32  | NA   | NA   | 0.2   | 0    | 3.02 |
| Ttc33  | NA   | 2.08 | 1.39  | 1.97 | 1.56 |
| Ttc35  | NA   | NA   | NA    | NA   | 0    |
| Ttc36  | NA   | NA   | 1.41  | 1.58 | 1.64 |
| Ttc37  | NA   | 1.55 | 1.84  | 0.82 | 0    |
| Ttc38  | NA   | 2.39 | 3.26  | 0.45 | 0    |
| Ttc39a | NA   | 1.62 | 2.05  | 2.37 | 0    |
| Ttc39b | NA   | NA   | 11.17 | 2.02 | 3.17 |
| Ttc39c | NA   | NA   | 2     | 2.31 | 2.34 |
| Ttc4   | 0    | 0    | 1.22  | 0.13 | 0    |
| Ttc5   | 0    | NA   | 1.28  | 0.2  | 5.58 |
| Ttc6   | NA   | NA   | 1.85  | NA   | NA   |
| Ttc7b  | 1.16 | NA   | 1.89  | 1.99 | 2.09 |
| Ttc8   | 0    | NA   | 1.68  | 0.13 | 0    |
| Ttc9   | NA   | 1.15 | 1.31  | 0.86 | 0    |
| Ttc9b  | NA   | NA   | 1.36  | 2.2  | 2.78 |
| Ttc9c  | NA   | NA   | 0.72  | 1.76 | 0.07 |
| Ttf1   | 0    | 0    | 0.52  | 3.28 | 2.95 |
| Ttf2   | 0.72 | 0.14 | 0.73  | 3.42 | 0    |
| Tti1   | NA   | 0    | 1.93  | 1.09 | NA   |
| Tti2   | NA   | 0.85 | 0.9   | NA   | NA   |
| Ttk    | 0    | 1.2  | 1.68  | 0.31 | 0    |
| Ttl    | 0.81 | NA   | 0.9   | 0.89 | 0    |
| Ttl1   | 0.53 | 0    | 2.09  | 1.63 | 0.77 |
| Ttl10  | NA   | NA   | 0     | 1.07 | 0    |
| Ttl11  | NA   | NA   | 0.21  | 0.57 | 0.47 |
| Ttl12  | NA   | 0.06 | 1.24  | 3.9  | 1.39 |
| Ttl13  | NA   | NA   | 0.56  | 2.56 | NA   |
| Ttl3   | NA   | 1.79 | 1.37  | NA   | 0.08 |
| Ttl4   | 0    | 0.95 | 0     | 2.12 | 0    |
| Ttl5   | NA   | 0.63 | 1.1   | 0.64 | 0.15 |
| Ttl6   | NA   | NA   | 1.05  | 1.15 | 1.84 |
| Ttl7   | NA   | 1.16 | 0.35  | 0.49 | 1.11 |
| Ttl9   | NA   | NA   | 0.52  | 2.94 | 2.85 |
| Ttn    | 0.32 | 1.27 | 0.24  | 0    | 1.22 |
| Ttpa   | 2.13 | 2.14 | 3.02  | 1.44 | 3.36 |
| Ttpal  | NA   | 0.09 | 1.16  | 0    | 0.85 |

|         |      |      |      |      |       |
|---------|------|------|------|------|-------|
| Ttr     | 0    | 0.6  | 0.9  | 0.49 | 10.62 |
| Ttrap   | 0    | NA   | NA   | NA   | NA    |
| Ttyh1   | 0.79 | 0.61 | 1.05 | 0    | 0     |
| Ttyh2   | 0.85 | NA   | 0    | 1.08 | 0     |
| Ttyh3   | 0.8  | NA   | 2.46 | 1.54 | 0     |
| Tub     | 0.48 | 1.58 | 0.47 | NA   | 2.49  |
| Tuba1a  | NA   | 1.92 | 1.19 | 0.3  | 0.09  |
| Tuba1b  | NA   | 1.7  | 0.64 | 0.47 | 0     |
| Tuba4a  | NA   | 1.27 | 1.74 | 0.84 | 0.05  |
| Tuba8   | 0.61 | 3.09 | 2.88 | 2.93 | 0     |
| Tubal3  | NA   | NA   | NA   | 0.93 | NA    |
| Tubb1   | NA   | 0    | 0.91 | 0.24 | 0     |
| Tubb2a  | NA   | 0.01 | 1.22 | 0.63 | 0.76  |
| Tubb2b  | NA   | 1.2  | 1.36 | 0    | 0.71  |
| Tubb2c  | NA   | NA   | NA   | NA   | 0.49  |
| Tubb3   | 0.34 | 1.09 | 0    | 2.34 | 0.87  |
| Tubb4   | 0.39 | NA   | NA   | NA   | 3     |
| Tubb4a  | NA   | 1.69 | 0.7  | 0.53 | NA    |
| Tubb4b  | NA   | 0.18 | 1.29 | 0    | NA    |
| Tubb6   | NA   | 1.06 | 0.29 | 0.66 | 0.82  |
| Tubd1   | 0.67 | 2.6  | 0.75 | 0    | 0     |
| Tube1   | 0    | NA   | 0.25 | NA   | 1.28  |
| Tubg1   | 0.09 | 0.85 | 0.89 | 1.37 | 1.68  |
| Tubg2   | 0    | 0    | 0.67 | 0.56 | NA    |
| Tubgcp2 | 0.71 | 0.67 | 2.22 | 0.72 | 3.11  |
| Tubgcp3 | 1.41 | 0    | 2.7  | 0    | 4.44  |
| Tubgcp4 | NA   | 0    | 1.81 | 0.18 | 0     |
| Tubgcp5 | 0    | 0    | 0.12 | 0.88 | 0.29  |
| Tubgcp6 | 0.58 | NA   | 1.57 | 1.09 | 1.93  |
| Tufm    | 0.26 | 0.03 | 0.7  | 3.81 | 0.09  |
| Tuft1   | 0.22 | 0.21 | 1.24 | 0.39 | 2.32  |
| Tug1    | NA   | 1.01 | 1.08 | 1.41 | 1.87  |
| Tulp1   | 0.5  | 2.41 | 1.26 | 0.64 | 3.85  |
| Tulp2   | 2.28 | 1.59 | 0.94 | 1.18 | 0     |
| Tulp3   | 0.62 | 0    | 0.1  | 0.41 | 1.15  |
| Tulp4   | 0    | 1.18 | 1.31 | 1.24 | 0     |
| Tusc1   | 0.19 | NA   | 1.02 | 1.48 | 0.46  |
| Tusc2   | 1.86 | 2.72 | 0.87 | NA   | 0     |
| Tusc3   | 0.07 | 1.95 | 2.63 | 0    | 4.54  |
| Tusc4   | 0    | NA   | NA   | NA   | NA    |
| Tusc5   | NA   | NA   | 0.6  | 1.13 | 0     |

|         |      |      |      |      |      |
|---------|------|------|------|------|------|
| Tut1    | NA   | 1    | 2.33 | 1.44 | 0    |
| Tvp23a  | NA   | NA   | 2.21 | 2.07 | NA   |
| Tvp23b  | NA   | 1.37 | 2.49 | NA   | NA   |
| Twf1    | NA   | 2.04 | 1.38 | 0.64 | 0    |
| Twf2    | NA   | 0.32 | 2.53 | 8.18 | 0    |
| Twist1  | 2.09 | 0.92 | 1.22 | 0.9  | 1.03 |
| Twist2  | 0.87 | NA   | 1.99 | 3.17 | 4.34 |
| Twistnb | 0.34 | 1.16 | 2.04 | 3.03 | 2.15 |
| Twsg1   | 0.7  | 0.88 | 0.63 | 0.06 | 0    |
| Txk     | 1.22 | 0    | 1.73 | 0    | 4.46 |
| Txlna   | NA   | 1.06 | 1.36 | 0    | 0    |
| Txlnb   | NA   | NA   | 0.75 | 1.08 | 1.04 |
| Txlng   | NA   | 0.13 | 0.75 | 1.34 | NA   |
| Txn2    | 0.15 | 1.67 | 0.46 | 2.48 | 0    |
| Txndc1  | 0.62 | NA   | NA   | NA   | NA   |
| Txndc11 | NA   | NA   | 0.16 | 0.85 | 2.65 |
| Txndc12 | NA   | NA   | 1.89 | 0    | 0    |
| Txndc15 | NA   | 0.87 | 1.59 | 0.64 | 0    |
| Txndc16 | NA   | NA   | 2.01 | 0    | 0    |
| Txndc17 | NA   | NA   | 2.13 | 0.73 | 0    |
| Txndc2  | 0    | NA   | 0    | 2.55 | 0.68 |
| Txndc3  | 0    | NA   | NA   | NA   | 4.14 |
| Txndc4  | 0.97 | NA   | NA   | NA   | NA   |
| Txndc5  | 0.44 | 0    | 0.56 | NA   | 0    |
| Txndc8  | 0.98 | NA   | 3.59 | 6.92 | NA   |
| Txndc9  | 0.36 | 0.23 | 1.7  | 0    | 1.83 |
| Txnip   | 0.98 | 0    | 2.56 | 0.54 | 1.13 |
| Txnl1   | 0    | 0.24 | 1.03 | 0.79 | 0    |
| Txnl2   | 0.49 | NA   | NA   | NA   | NA   |
| Txnl4a  | NA   | 0.49 | 0.56 | 0.76 | 2.59 |
| Txnl4b  | 0.77 | 0.08 | 2.49 | 0.45 | 11.9 |
| Txnl5   | 1.57 | NA   | NA   | NA   | NA   |
| Txnl6   | 0.74 | NA   | NA   | NA   | NA   |
| Txnrd1  | 3.74 | 1.33 | 0.56 | 0.49 | 3.8  |
| Txnrd2  | 0    | 1.61 | 1.17 | 0.61 | 0.93 |
| Txnrd3  | 0    | 0.89 | 0.72 | NA   | 1.31 |
| Tyk2    | 0.83 | 0.67 | 1.92 | 0.68 | 0.59 |
| Tyms    | 0.2  | 0.6  | 0.46 | NA   | 0.69 |
| Tyr     | 2.84 | 0.95 | 0    | 0    | 0    |
| Tyro3   | 0.91 | 1.32 | 2.7  | 2.02 | NA   |
| Tyrobp  | 1.34 | 0.29 | 0.68 | NA   | 0    |

|         |      |      |      |      |      |
|---------|------|------|------|------|------|
| Tyrp1   | 0.55 | 0.38 | 0.42 | 0.05 | 2.32 |
| Tysnd1  | 0    | NA   | 0.33 | 1.33 | 0    |
| Tyw1    | NA   | 0    | 2.63 | 1.14 | 0    |
| Tyw3    | NA   | NA   | 0.37 | 0.18 | 0    |
| Tyw5    | NA   | NA   | 2.2  | 0    | NA   |
| U2af1   | 0    | 1.66 | 1.81 | 0.54 | 0.22 |
| U2af114 | NA   | NA   | 1.66 | 2.07 | NA   |
| U2af2   | 0.09 | 1.62 | 0.19 | 0.85 | 1.42 |
| U2surp  | NA   | 1.11 | 1.09 | 1.23 | NA   |
| Uaca    | 1.08 | NA   | 0.19 | 2.3  | 0    |
| Uap1    | 0.86 | 1.44 | 2.86 | 1.42 | NA   |
| Uap111  | 0.02 | 0.53 | 1.34 | 0.71 | 0    |
| Uba1    | NA   | 0.32 | 0.54 | 0    | 0.05 |
| Uba2    | NA   | 2.03 | 1.02 | 0.7  | 0    |
| Uba3    | NA   | 0.3  | 2.46 | 1.01 | 1.28 |
| Uba5    | NA   | 1.64 | 2.33 | 0.57 | 2.84 |
| Uba52   | 0.13 | 0    | 1.14 | 0    | 0    |
| Uba6    | NA   | 0.79 | 1.08 | 0.49 | 0.99 |
| Uba7    | NA   | 0    | 1.84 | 0.6  | 1.8  |
| Ubac1   | NA   | 2.07 | 0.59 | 0.8  | 0    |
| Ubac2   | NA   | NA   | 0.33 | 0.93 | 2.72 |
| Ubadc1  | 0    | NA   | NA   | NA   | NA   |
| Ubald1  | NA   | NA   | 1.49 | 0    | NA   |
| Ubald2  | NA   | NA   | 3.11 | NA   | NA   |
| Ubap1   | 0.1  | 1.25 | 0.79 | 0.87 | 0    |
| Ubap2   | 0.12 | 0    | 3.02 | 1.69 | 0    |
| Ubap2l  | 0.17 | 1.14 | 2.42 | 1.46 | 0.91 |
| Ubash3a | 0.7  | 0    | 0.93 | 0.76 | 0    |
| Ubash3b | NA   | NA   | 2.67 | 2.19 | 1.25 |
| Ubb     | 1.33 | NA   | NA   | NA   | NA   |
| Ubc     | NA   | 0.61 | 1.71 | 1.84 | 2.11 |
| Ubd     | 1.12 | 0.9  | 4.67 | 1.46 | NA   |
| Ube1dc1 | 0.83 | NA   | NA   | NA   | NA   |
| Ube1l   | 0    | NA   | NA   | NA   | NA   |
| Ube2a   | 3.24 | 0    | 3.26 | 1.41 | 0    |
| Ube2b   | 0.27 | 1.56 | 0.59 | 1.21 | 1.28 |
| Ube2c   | 0.3  | 2.27 | 7.57 | 8.59 | 1.39 |
| Ube2cbp | NA   | NA   | NA   | NA   | 1.58 |
| Ube2d1  | 0    | 2.35 | 0    | 0    | 0    |
| Ube2d2  | 0.32 | NA   | NA   | NA   | 0.65 |
| Ube2d3  | 0.63 | 1.75 | 1.67 | 1.03 | 0    |

|         |      |      |      |      |      |
|---------|------|------|------|------|------|
| Ube2e1  | 0.07 | 1.52 | 2.52 | NA   | 2.69 |
| Ube2e2  | 0.23 | NA   | 0.21 | 0.91 | 2.98 |
| Ube2e3  | 0.63 | 0    | 2.45 | NA   | 0    |
| Ube2f   | NA   | NA   | 2.07 | 0.8  | 0.05 |
| Ube2g1  | 0.79 | 0.42 | 2.35 | 0    | 3.33 |
| Ube2g2  | 0.09 | 2.12 | 0.32 | 1.04 | 0    |
| Ube2h   | 0    | 2.88 | 1.42 | 0    | 0    |
| Ube2i   | 0    | 0    | 0.93 | 0.01 | 0.66 |
| Ube2j1  | 0.01 | 0.83 | 0.76 | 0.81 | 0    |
| Ube2j2  | 0.5  | NA   | 2.44 | 2.07 | 1.59 |
| Ube2k   | NA   | 0    | 1.1  | 0.4  | 0    |
| Ube2l3  | 3.02 | 0.83 | 0.89 | 0    | 0    |
| Ube2l6  | 0.22 | 1.54 | 2.26 | 0    | 1.66 |
| Ube2m   | 0    | 1.09 | 1.06 | 1.1  | 0    |
| Ube2n   | 0    | 1.09 | 0.26 | 0.86 | 0    |
| Ube2o   | NA   | 0.44 | 1.94 | 1.44 | 1.89 |
| Ube2q1  | NA   | 0    | 0.55 | 0.98 | 1.68 |
| Ube2q2  | NA   | NA   | 3.13 | 1.89 | 0    |
| Ube2ql1 | NA   | NA   | 0.73 | NA   | NA   |
| Ube2r2  | 2.97 | NA   | 1.11 | 0.84 | 0    |
| Ube2s   | NA   | 1.57 | 2.78 | 2.48 | 2.43 |
| Ube2t   | NA   | NA   | 2.11 | 3.02 | 2.34 |
| Ube2u   | NA   | NA   | 3.64 | 0    | 0    |
| Ube2v1  | 0.06 | NA   | NA   | 1.3  | NA   |
| Ube2v2  | 0    | 0.98 | 1.33 | 0.65 | 0    |
| Ube2w   | NA   | 0.79 | 0.85 | 0.12 | 2.79 |
| Ube2z   | NA   | 0.93 | 1.44 | 0    | 0.8  |
| Ube3a   | 0.4  | 0.1  | 1.19 | 0.11 | 0    |
| Ube3b   | 0    | 1.27 | 1.81 | 0.98 | 0    |
| Ube3c   | 1.13 | 0.29 | 0.19 | 2.4  | 1.09 |
| Ube4a   | 0    | 0.69 | 0.81 | 0.3  | 1.43 |
| Ube4b   | 0    | 0    | 1.3  | 0    | 0.54 |
| Ubfd1   | NA   | 1.75 | 1.2  | NA   | 0.62 |
| Ubiad1  | NA   | 0    | 0    | 1.44 | 0    |
| Ubl3    | 0.34 | 1.03 | 2.52 | 2.37 | 0    |
| Ubl4a   | NA   | NA   | NA   | 0.28 | NA   |
| Ubl4b   | NA   | NA   | 0.85 | 2.24 | NA   |
| Ubl5    | 0.57 | 1.59 | 1.07 | 0    | 0    |
| Ubl7    | NA   | NA   | 0.5  | 1.69 | 0    |
| Ublcp1  | NA   | NA   | 2.4  | 0.48 | 3.39 |
| Ubn1    | 0    | 0    | 1.37 | 0    | 0.88 |

|        |      |      |      |      |      |
|--------|------|------|------|------|------|
| Ubn2   | NA   | NA   | 0.96 | 1.46 | 0.51 |
| Ubox5  | NA   | 0.71 | 2.02 | NA   | 1.28 |
| Ubp1   | 0    | 0    | 2.92 | 1.73 | 2.25 |
| Ubqln1 | 0.1  | NA   | 1.66 | 1.11 | 2.39 |
| Ubqln2 | 0.27 | 1.12 | 0.86 | 0.32 | 0.92 |
| Ubqln3 | NA   | 1.61 | 0    | 2.23 | 5.06 |
| Ubqln4 | NA   | 2.46 | 1.04 | 1.97 | 0.57 |
| Ubqln1 | NA   | NA   | 0.85 | 2.39 | 0.79 |
| Ubr1   | 0.83 | NA   | 0.79 | 0    | 0    |
| Ubr2   | NA   | 1.26 | 0.8  | 0    | 1.11 |
| Ubr3   | NA   | NA   | 1.08 | 0    | 0    |
| Ubr4   | NA   | 2.37 | 0.79 | NA   | 0    |
| Ubr5   | NA   | 0.21 | 1.42 | 0    | 3.12 |
| Ubr7   | NA   | 0    | 1.73 | 1.15 | 2.63 |
| Ubt1   | 0    | 0    | 1.96 | 0.43 | 0    |
| Ubt2   | NA   | NA   | 1.86 | 0.75 | 0    |
| Ubt    | 0.77 | 0    | 0.17 | 4.6  | 0    |
| Ubt1   | NA   | NA   | NA   | 0.85 | NA   |
| Ubx1   | 0.92 | NA   | NA   | NA   | NA   |
| Ubx2   | 2.69 | NA   | NA   | NA   | NA   |
| Ubx3   | 0.93 | NA   | NA   | NA   | NA   |
| Ubx4   | 0.88 | NA   | NA   | NA   | NA   |
| Ubx1   | NA   | 1.17 | 4.48 | 0.1  | 0    |
| Ubx10  | NA   | NA   | 0.59 | 2.05 | 2.21 |
| Ubx11  | NA   | NA   | 0    | 0.08 | 2.81 |
| Ubx2a  | NA   | NA   | 2.57 | 0.95 | 1.47 |
| Ubx2b  | NA   | 1.69 | 0.69 | 0.81 | 2.67 |
| Ubx4   | NA   | 0    | 2.23 | 0.55 | 0.36 |
| Ubx6   | NA   | 0.75 | 0.96 | 0.88 | 0.84 |
| Ubx7   | NA   | 0.71 | 1.07 | 0    | 0    |
| Ubx8   | NA   | 1.98 | 2.26 | 1.06 | 1.87 |
| Uchl1  | 0.41 | 2.12 | 1.28 | 0.32 | 0    |
| Uchl3  | 0    | NA   | NA   | 0    | NA   |
| Uchl5  | 0.46 | 1.09 | 0.33 | 0.64 | 1.78 |
| Uck1   | 0.33 | NA   | 2.72 | 0.39 | 0    |
| Uck2   | NA   | 1.54 | 1.1  | 0.94 | 0    |
| Uck1   | 0    | 0    | 1.96 | 1.77 | 0.72 |
| Ucma   | NA   | NA   | 1.91 | 0.56 | 0.64 |
| Ucn    | 1.53 | 1.42 | 4.73 | NA   | 0    |
| Ucn2   | 0    | NA   | 0.34 | 0.36 | 2.03 |
| Ucn3   | 0.09 | NA   | 2.98 | 1.9  | NA   |



|           |      |      |      |      |      |
|-----------|------|------|------|------|------|
| Ucp1      | 1.38 | 0.79 | 0.67 | 1.26 | 1.54 |
| Ucp2      | 0    | 0    | 0.84 | 5.96 | 0    |
| Ucp3      | 0.95 | 0.82 | 0.62 | 0.26 | 2.73 |
| Uevld     | NA   | 1.06 | 2.57 | 1.2  | 1.64 |
| Ufc1      | NA   | 1.83 | 2.25 | 1.9  | 0    |
| Ufd11     | 0    | 0    | 3.66 | 0.88 | 2.16 |
| Ufl1      | NA   | 1.35 | 1.22 | 0.2  | NA   |
| Ufm1      | NA   | 1.44 | 1.66 | 0.58 | 0    |
| Ufsp1     | NA   | NA   | 0.09 | 0.4  | 0.9  |
| Ufsp2     | NA   | 2.41 | 1.79 | 1.22 | 0    |
| Ugcg      | 0.58 | 2.1  | 2.04 | 0.05 | 0    |
| Ugcgl1    | 0.61 | NA   | NA   | NA   | NA   |
| Ugdh      | 1.05 | 2.19 | 2.09 | 0.56 | 1.45 |
| Uggt1     | NA   | 0.9  | 0.31 | 0    | 0    |
| Uggt2     | NA   | 1.2  | 0.43 | 0    | 0.62 |
| Ugp2      | 0.83 | 0    | 1.75 | 0.09 | 0    |
| Ugt1a1    | 2.82 | 1.36 | 1.87 | NA   | NA   |
| Ugt1a10   | 3.73 | NA   | NA   | NA   | NA   |
| Ugt1a5    | 2.31 | NA   | NA   | NA   | NA   |
| Ugt1a6    | 0    | NA   | NA   | NA   | NA   |
| Ugt1a9    | 0.33 | NA   | NA   | NA   | NA   |
| Ugt2a1    | 0.85 | NA   | NA   | NA   | NA   |
| Ugt2a2    | NA   | 3.07 | 0.66 | 0.84 | NA   |
| Ugt2a3    | NA   | 2.67 | 0.48 | 1.37 | 1.35 |
| Ugt3a1    | NA   | NA   | 0.38 | 0    | 2.69 |
| Ugt3a2    | NA   | NA   | NA   | 0.89 | NA   |
| Ugt8      | 2.1  | NA   | NA   | NA   | NA   |
| Uhmk1     | NA   | NA   | 0.52 | 0.02 | 5.57 |
| Uhrf1     | 0.03 | NA   | 2.08 | 0    | 0.4  |
| Uhrf1bp1  | NA   | NA   | 0.75 | 1.39 | 0.49 |
| Uhrf1bp11 | NA   | 0.05 | 0.66 | NA   | 0.23 |
| Uhrf2     | 0.76 | NA   | 1.14 | 0.6  | 0    |
| Uimc1     | NA   | 3.73 | 1    | 0.55 | 0.73 |
| Ulbp1     | NA   | 0.12 | 2.21 | NA   | 0    |
| Ulk1      | 0.15 | 0.78 | 1.51 | 0    | 0.13 |
| Ulk2      | 0.91 | 0.16 | 3.08 | 4.09 | 1.13 |
| Ulk3      | NA   | NA   | 2.45 | 0    | 0    |
| Ulk4      | NA   | 1.07 | 1.62 | 0.27 | 0.3  |
| Umod      | 2.41 | 0.67 | 0.29 | 1.47 | 1.14 |
| Umodl1    | NA   | NA   | 1.13 | 2.9  | NA   |
| Umps      | 0.52 | 0.65 | 0.38 | 0.66 | 1.3  |

|         |      |      |      |      |      |
|---------|------|------|------|------|------|
| Unc119  | 1.06 | 1.89 | 1.7  | 1.05 | 2.03 |
| Unc119b | NA   | 0    | 0.49 | 0    | 0.56 |
| Unc13a  | 0    | 0    | 0.34 | 0    | 0    |
| Unc13b  | 0.36 | 0.6  | 1.83 | 1.07 | 2.31 |
| Unc13c  | 0    | NA   | 0    | 0.38 | NA   |
| Unc13d  | 0.08 | NA   | 1.75 | 3.34 | 0    |
| Unc45a  | NA   | 0.6  | 1.44 | 0    | 0.3  |
| Unc45b  | NA   | NA   | 1.97 | 0    | 2.27 |
| Unc50   | 0    | 0.14 | 0.8  | 1.22 | 2.72 |
| Unc5a   | 0.75 | NA   | 0.57 | 0    | 3.91 |
| Unc5b   | 0.27 | 0.18 | 1.93 | 0    | 1.27 |
| Unc5c   | 0.54 | 2.47 | 0.27 | 0.28 | 1.27 |
| Unc5cl  | 1.96 | NA   | 0.42 | 0.93 | 0.41 |
| Unc5d   | 1.71 | NA   | 1.92 | 0    | 1.99 |
| Unc79   | NA   | NA   | 1.01 | 0.6  | NA   |
| Unc80   | NA   | NA   | 1.26 | 1.13 | 2.48 |
| Unc84a  | 0.03 | NA   | NA   | NA   | NA   |
| Unc93a  | 2.13 | NA   | NA   | NA   | NA   |
| Unc93b1 | NA   | 2.25 | 2.2  | 0.46 | 0    |
| Uncx    | NA   | NA   | NA   | 1.36 | NA   |
| Uncx4.1 | 0.59 | NA   | NA   | NA   | NA   |
| Ung     | 0.18 | 2.29 | 1.47 | 5.46 | 1.98 |
| Unk     | NA   | NA   | 1.38 | 0    | 1    |
| Unk1    | NA   | 3.05 | 2.35 | 1.45 | 0    |
| Upb1    | 0    | 3.59 | 2.57 | 1.02 | 2.1  |
| Upf1    | NA   | 1.97 | 0.96 | 0    | 0.65 |
| Upf2    | 0.03 | 0.68 | 1.13 | 0.94 | 1.26 |
| Upf3a   | 0    | 0.92 | 2.04 | 0.96 | 1.83 |
| Upf3b   | 0    | 0.55 | 0.9  | 0.41 | 0    |
| Upk1a   | 1.5  | 3.24 | 1.49 | 0.44 | 4.69 |
| Upk1b   | 0.41 | 0    | 1.98 | 4.93 | 1.13 |
| Upk2    | 4.23 | 1.63 | 0.66 | 1.54 | 0    |
| Upk3a   | 0.53 | 2.43 | 2.05 | 3.33 | 1.82 |
| Upk3b   | 1.28 | 1.15 | 1.14 | 1.07 | 0.57 |
| Upk3bl  | NA   | NA   | NA   | 1.31 | NA   |
| Upp1    | 0.78 | 0    | 1.79 | 7.35 | 0    |
| Upp2    | 0.33 | NA   | 0    | 1.98 | 1.13 |
| Uppt    | NA   | NA   | NA   | 0.38 | NA   |
| Uqcc    | NA   | 0    | 0    | 0.46 | 0.75 |
| Uqcr    | 0.19 | NA   | NA   | NA   | NA   |
| Uqcr10  | NA   | 1.16 | 0.89 | 0    | NA   |

|         |      |      |      |      |       |
|---------|------|------|------|------|-------|
| Uqcr11  | NA   | 1.41 | 2.05 | 2.15 | NA    |
| Uqcrb   | 0.22 | 0    | 0.81 | 0.56 | 0     |
| Uqerc1  | 0    | 1.59 | 1.08 | 6.49 | 0     |
| Uqerc2  | 0    | 1.45 | 0.04 | NA   | 0     |
| Uqcrfs1 | 0    | 0.19 | 3.51 | 0.58 | 0     |
| Uqcrh   | 0.76 | 1.37 | 3.37 | 0.3  | 0     |
| Uqcrq   | NA   | 0    | 0.6  | 0.69 | 1.66  |
| Urb1    | NA   | 0.05 | 0.36 | NA   | 0     |
| Urb2    | NA   | 2.39 | 0    | 1.65 | 1.19  |
| Urgep   | NA   | 0.63 | 0.81 | 3.99 | NA    |
| Uri1    | NA   | 0    | 1.56 | 0.85 | NA    |
| Urm1    | NA   | 0.9  | 0.87 | 1.69 | 0     |
| Uroc1   | NA   | NA   | 0    | 0.76 | NA    |
| Urod    | 0    | 1.84 | 0.97 | 0.74 | 0     |
| Uros    | 0    | 0.04 | 0    | 1.21 | 0     |
| Usb1    | NA   | 0    | 1.14 | 0.24 | NA    |
| Use1    | NA   | 0.47 | 1.55 | 0.43 | 2.61  |
| Usf1    | 0.31 | NA   | 1.57 | 1.63 | 0.93  |
| Usf2    | 0.55 | 0.53 | 1.63 | 0.82 | 0.87  |
| Ush1c   | 0.58 | 0.31 | 0.09 | 0.21 | 0     |
| Ush1g   | 1.38 | NA   | NA   | 2.88 | NA    |
| Ush2a   | 0.72 | 2.63 | 0    | 2.17 | 1.5   |
| Ush3a   | 0.91 | NA   | NA   | NA   | NA    |
| Ushbp1  | 0    | NA   | 0.38 | 3.08 | 0     |
| Usmg5   | 1.89 | NA   | 1.88 | 0    | 0     |
| Uso1    | NA   | 0.92 | 2.62 | 0.31 | 0     |
| Usp1    | 0.25 | 1.4  | 1.27 | 0.66 | 2.18  |
| Usp10   | 2.47 | 1.16 | 0.77 | 0.66 | 1.01  |
| Usp11   | 0.28 | 0    | 0.61 | 0    | 5.84  |
| Usp12   | 0.32 | 1.64 | 1.1  | 0.79 | 0     |
| Usp13   | 0.23 | 0    | 0.77 | 0.14 | 0.73  |
| Usp14   | 0.1  | 0    | 3.11 | NA   | 0     |
| Usp15   | 0.74 | 2.08 | 0    | 0.46 | 2.23  |
| Usp16   | 2.34 | 0.79 | 2.12 | 0.65 | 1.73  |
| Usp18   | 0.18 | 2.25 | 5.57 | 0.38 | NA    |
| Usp19   | 0    | 0    | 1.46 | 0    | 0.87  |
| Usp2    | 0.76 | 0.36 | 2.29 | 1.06 | 0     |
| Usp20   | 0.72 | 0    | 0.23 | 0.02 | 1.95  |
| Usp21   | 0.12 | 0    | 1.56 | 0.59 | 14.97 |
| Usp22   | 0.14 | 0.96 | 2.14 | 0    | 0     |
| Usp24   | 0.2  | 0    | 1.63 | 3.61 | 0     |

|        |      |      |      |      |      |
|--------|------|------|------|------|------|
| Usp25  | 0.18 | 1.49 | 1.46 | 1.06 | 0.59 |
| Usp26  | 4.58 | NA   | 0.97 | 1.46 | 4.12 |
| Usp27x | 2.22 | 1.74 | 1.23 | 2.81 | 0.68 |
| Usp28  | 1.46 | NA   | 5.55 | 0    | 0    |
| Usp29  | 0.52 | 1.38 | 0.64 | NA   | 0    |
| Usp3   | 0    | 2.03 | 1.03 | 0    | 2.65 |
| Usp30  | NA   | NA   | 0.8  | 0    | 1.98 |
| Usp31  | 1.46 | NA   | 0.75 | 1.57 | 0    |
| Usp32  | NA   | 1.77 | 0.92 | 1.08 | 0    |
| Usp33  | 0    | 1.45 | 0.44 | 1.58 | 0    |
| Usp34  | 1.84 | 0.05 | 2.04 | NA   | 0.81 |
| Usp35  | NA   | NA   | NA   | 2.05 | NA   |
| Usp36  | 0.3  | 0    | 0.24 | 2.18 | 0    |
| Usp37  | 0.03 | NA   | 1.65 | 1.08 | 1.74 |
| Usp38  | 0.08 | NA   | 1.02 | 0.63 | 0.38 |
| Usp39  | 0.18 | 1.12 | 2.63 | 1.36 | 0    |
| Usp4   | 1.5  | 0    | 2    | 0    | 1.11 |
| Usp40  | 0.43 | NA   | 0.06 | 0.72 | 0    |
| Usp42  | NA   | NA   | 1.17 | 0.25 | 0.52 |
| Usp43  | NA   | NA   | 0.38 | 0    | 2.88 |
| Usp44  | NA   | NA   | NA   | 0.86 | NA   |
| Usp45  | NA   | NA   | 0.23 | 0    | 0    |
| Usp46  | NA   | 0.74 | 0.72 | 1.52 | 0.91 |
| Usp47  | 0.09 | 0.67 | 1.15 | 0.44 | 2.37 |
| Usp48  | 0    | 0.09 | 0.74 | 0.44 | 0.8  |
| Usp49  | 0.1  | 1.47 | 0.98 | 0.11 | 0    |
| Usp5   | 0    | 1.92 | 0    | 4.43 | 0.03 |
| Usp50  | NA   | NA   | NA   | 0    | NA   |
| Usp51  | NA   | NA   | NA   | 2.49 | NA   |
| Usp52  | 0    | NA   | NA   | NA   | NA   |
| Usp53  | 1.52 | 1.28 | 1.13 | 0.44 | 0.11 |
| Usp54  | 2.29 | NA   | 0.99 | 1.87 | 0.42 |
| Usp6nl | 0.65 | 0.59 | 1.3  | 0.2  | 2.01 |
| Usp7   | 0.85 | 0    | 0.29 | 0    | 1.13 |
| Usp8   | 0.3  | 0.88 | 0.9  | 1.38 | 1.03 |
| Usp9x  | 0.77 | 1    | 1.79 | 0    | 0.26 |
| Usp9y  | 0.69 | 3.13 | 0.94 | 0.9  | 0    |
| Usp11  | NA   | 0    | 0.56 | 0    | 3.16 |
| Ust    | 0.44 | 0    | 2.28 | 0.11 | 0.69 |
| Utf1   | 2.13 | 0.88 | 0.69 | 0.9  | 0    |
| Utp111 | NA   | 1.39 | 2.02 | 0.41 | 0    |

|        |      |      |      |      |      |
|--------|------|------|------|------|------|
| Utp14a | 0.02 | 1.45 | 0.63 | 0.81 | 1.71 |
| Utp15  | NA   | NA   | 1.06 | 2.09 | 1.87 |
| Utp18  | NA   | 0.78 | 0    | 1.99 | 0.85 |
| Utp20  | NA   | 1    | 0.28 | 4.66 | 0.04 |
| Utp23  | NA   | NA   | 0.95 | 2.95 | 2.74 |
| Utp3   | NA   | 1.17 | 0.47 | 2.54 | 0    |
| Utp6   | NA   | 1.28 | 0.46 | 0.64 | 2.09 |
| Utrn   | 1.16 | 0    | 3.47 | 0    | 1.44 |
| Uts2   | 0.34 | 1.62 | 0    | 1.94 | 4.57 |
| Uts2b  | NA   | NA   | NA   | 0.56 | NA   |
| Uts2r  | 1.44 | NA   | 1.26 | 1.38 | NA   |
| Utx    | 0.2  | NA   | NA   | NA   | NA   |
| Uty    | 0.51 | 1.08 | 0.12 | 0.6  | 0.88 |
| Uvrag  | NA   | 0    | 1.58 | 0.88 | 2.2  |
| Uvssa  | NA   | NA   | 0.93 | 0    | NA   |
| Uxs1   | 2.55 | 1.38 | 1.24 | 0.67 | 0    |
| Uxt    | 1.54 | 3.02 | 2.48 | 1.28 | 4.23 |
| Vac14  | NA   | 0.7  | 1.96 | 2.26 | 0    |
| Vamp1  | 0.58 | 0.51 | 0.59 | NA   | 0    |
| Vamp2  | 0.46 | 0    | 1.37 | 0    | 0.9  |
| Vamp3  | 0    | 0    | 0.95 | 0.84 | 0    |
| Vamp4  | 0    | 0.64 | 3.91 | 0.56 | 2.56 |
| Vamp5  | 1.56 | 0    | 0    | 0.18 | 1.22 |
| Vamp7  | NA   | 3.66 | 1.97 | 1.32 | 0    |
| Vamp8  | 0.55 | 0.62 | 0.26 | 0    | 0    |
| Vangl1 | 1.14 | 1.12 | 1.39 | 1.01 | 1.46 |
| Vangl2 | NA   | NA   | 0.76 | 1.08 | 2.31 |
| Vapa   | 1.26 | 0    | 1.64 | 0.36 | 0.66 |
| Vapb   | 1.7  | 1.36 | 0.82 | 0.74 | 0    |
| Vars   | NA   | 0.03 | 0.51 | 1.4  | 1.19 |
| Vars2  | 0.78 | NA   | 0.69 | 1.15 | 0    |
| Vash1  | NA   | 0.26 | 0.71 | 2.19 | 1.75 |
| Vash2  | NA   | 1.26 | 1.54 | 0.11 | 1.02 |
| Vasn   | NA   | NA   | 2    | 0    | 1.61 |
| Vasp   | 1.01 | 1.67 | 0.84 | 2.22 | 0    |
| Vat1   | 0.57 | 1.1  | 1.88 | 0.28 | 1.57 |
| Vat11  | NA   | NA   | 0.51 | 1.09 | 0.38 |
| Vav1   | 0.59 | 0    | 2.26 | 2.19 | 0    |
| Vav2   | 1    | 1.33 | 1.05 | 7.23 | 0    |
| Vav3   | 0    | 0    | 1.53 | 3.17 | 0    |
| Vax1   | 4.02 | NA   | NA   | 1.02 | NA   |

|          |      |      |      |      |       |
|----------|------|------|------|------|-------|
| Vax2     | 0.98 | 0.12 | 0.11 | 1.44 | 0     |
| Vbp1     | 0.4  | 2.3  | 2.61 | 2.49 | 0     |
| Vcam1    | 2.32 | 0.32 | 0.91 | 2.38 | 0     |
| Vcan     | NA   | 0.39 | 0.41 | 0    | 0.83  |
| Vcl      | 0.33 | 0    | 0.31 | 0    | 0     |
| Vcp      | 0    | 1.03 | 1.46 | 0    | 2.01  |
| Vcpip1   | NA   | 0    | 0.37 | 0.85 | 0     |
| Vdac1    | 0.71 | 0.65 | 0.34 | 0.18 | 0     |
| Vdac2    | 0.84 | 2.42 | 5.44 | 0.93 | 0     |
| Vdac3    | 0    | 0.74 | 1.01 | 0.94 | 0     |
| Vdp      | 0.72 | NA   | NA   | NA   | NA    |
| Vdr      | 0.35 | 0.85 | 0.45 | 0    | 0     |
| Vegfa    | 0.32 | 0.84 | 1.58 | 2.09 | 0.92  |
| Vegfb    | 0.42 | 0    | 2.69 | 0.48 | 0     |
| Vegfc    | 0.2  | 1.07 | 0    | 0.17 | 1.57  |
| Veph1    | NA   | NA   | 1.18 | 0.24 | 12.98 |
| VeZF1    | 0.26 | 0    | 1.05 | 0.08 | 1.96  |
| VeZt     | NA   | 1.16 | 0.99 | 0.03 | 1.4   |
| Vgf      | NA   | 2.28 | 0.47 | 1.9  | 0     |
| Vgl11    | 1.45 | 0    | 2.32 | 1.52 | 0     |
| Vgl12    | 0    | NA   | 3.46 | 0.33 | 0.78  |
| Vgl13    | NA   | 1.05 | 0.58 | 1    | 1.23  |
| Vgl14    | 0.29 | 0    | 1.48 | 0    | 0     |
| Vhl      | NA   | 1.28 | 1.62 | 0.14 | 3.88  |
| Vil1     | 1.27 | 1.54 | 1.97 | 2.93 | 0     |
| Vil2     | 2.53 | NA   | NA   | NA   | NA    |
| Vill     | NA   | 1.59 | 0    | 2.75 | 0     |
| Vim      | 3    | 1.64 | 1.64 | 1.02 | 5.39  |
| Vimp     | NA   | NA   | 1.85 | 1.79 | NA    |
| Vip      | 7.45 | 2.35 | 0.69 | 0.72 | 1.33  |
| Vipas39  | NA   | 0.2  | 0.68 | 0.69 | NA    |
| Vipr1    | 0    | 0    | 1.55 | 0.41 | 2.31  |
| Vipr2    | 4.75 | 0.11 | 0    | 0.12 | 0     |
| Vit      | 0.88 | NA   | 0.22 | 1    | 0     |
| Vkorc1   | 0.31 | 3.2  | 1.27 | 0.8  | 0     |
| Vkorc111 | 0.1  | NA   | 1.11 | 0.46 | 0     |
| Vldlr    | 0.77 | 0.41 | 1.32 | 0    | 0.04  |
| Vma21    | NA   | NA   | 0.74 | 0.09 | NA    |
| Vmac     | NA   | NA   | NA   | 1.13 | NA    |
| Vmol     | NA   | NA   | NA   | 1.79 | NA    |
| Vmp1     | NA   | NA   | 1.02 | NA   | NA    |

|        |      |      |      |       |       |
|--------|------|------|------|-------|-------|
| Vnn1   | 1.15 | 1.64 | 1.93 | 4.59  | 1.95  |
| Vnn3   | 0.11 | 0    | 2.58 | 10.37 | 0     |
| Vopp1  | NA   | 0.95 | 2.21 | 7.02  | 2.85  |
| Vprbp  | NA   | 0    | 0.9  | NA    | 0     |
| Vpreb1 | 0.32 | 0.8  | 1.09 | 1.18  | 1.86  |
| Vpreb3 | 2.29 | 0    | 1.56 | 1.91  | 0.91  |
| Vps11  | 4.12 | 0    | 0.99 | 0.56  | 2.24  |
| Vps13a | NA   | 0.17 | 0    | 0     | 0     |
| Vps13b | NA   | 0.86 | 1.3  | 2.18  | 0.05  |
| Vps13c | 1.94 | 0.92 | 0.55 | 0     | 1.6   |
| Vps13d | 5.32 | 0    | 0.57 | 1.14  | 1.12  |
| Vps16  | 0    | 2.12 | 0.01 | 0.53  | 0.76  |
| Vps18  | 0.51 | NA   | 2.17 | 3.2   | 0.08  |
| Vps24  | 0.48 | NA   | NA   | NA    | NA    |
| Vps25  | NA   | NA   | 0.8  | 0.76  | 2.27  |
| Vps26a | NA   | 1.1  | 1.36 | 0.95  | 2.34  |
| Vps26b | NA   | NA   | 0.46 | 0     | 0     |
| Vps28  | 0.98 | 2.66 | 2.67 | 1.68  | 5.4   |
| Vps29  | 0.18 | NA   | 0.68 | 0     | 2.18  |
| Vps33a | 2.08 | 0.29 | 1    | 0     | 0     |
| Vps33b | 0    | 2.37 | 2.33 | 0     | 2.09  |
| Vps35  | 0.2  | 0.36 | 0.98 | 0.45  | 0     |
| Vps36  | NA   | NA   | 0.66 | 1.44  | 0     |
| Vps37a | NA   | NA   | 2.21 | NA    | 0     |
| Vps37b | NA   | 1.22 | 2.13 | 2.15  | 0.82  |
| Vps37c | NA   | 2.55 | 1.44 | 0.83  | 1.93  |
| Vps37d | NA   | NA   | 1.16 | 1.27  | 10.07 |
| Vps39  | 0    | 0.63 | 2.52 | 0.33  | 0.58  |
| Vps41  | 0    | 1.21 | 0.45 | 0     | 0     |
| Vps45  | 0.12 | 1.63 | 1.15 | 0.96  | 0     |
| Vps4a  | 0.61 | 2.24 | 1.53 | 1.08  | 0.03  |
| Vps4b  | 0.98 | 1.23 | 0.78 | 0.52  | 1.01  |
| Vps51  | NA   | 0    | 0.7  | 5.94  | NA    |
| Vps52  | 0.17 | 0    | 0.07 | 0.94  | NA    |
| Vps53  | NA   | 0.93 | 1.44 | 0     | 1.65  |
| Vps54  | 0.33 | 0.36 | 0.84 | 1.53  | 2.4   |
| Vps72  | NA   | 1.26 | 0.5  | 0.73  | 1.67  |
| Vps8   | NA   | 1.47 | 2.34 | 0.3   | 0     |
| Vps9d1 | NA   | 0.57 | 0.62 | 1.69  | NA    |
| Vrk1   | 0.01 | 0.66 | 2    | 1.07  | 2.96  |
| Vrk2   | 1.14 | 1.19 | 1.51 | 0.9   | 3.11  |

|         |      |      |      |      |      |
|---------|------|------|------|------|------|
| Vrk3    | NA   | 0.5  | 2.91 | 0.82 | 0.5  |
| Vrtn    | NA   | 0    | 2.17 | 1.45 | NA   |
| Vsig1   | NA   | NA   | 3.18 | 1.25 | 2.6  |
| Vsig10  | NA   | 0.89 | 0.52 | 0.07 | NA   |
| Vsig10l | NA   | NA   | 0.79 | 0.75 | NA   |
| Vsig2   | NA   | NA   | 0.73 | 1.77 | 1.37 |
| Vsig4   | 2.09 | 4.21 | 4.24 | 1.85 | NA   |
| Vsig8   | NA   | NA   | NA   | 1.32 | NA   |
| Vsnl1   | 0.41 | 0.27 | 0.11 | 0.87 | 1.37 |
| Vstm2a  | NA   | NA   | 0    | 0.22 | 4.05 |
| Vstm2b  | NA   | NA   | NA   | 0.65 | NA   |
| Vstm2l  | NA   | NA   | 0    | 1.21 | 2.79 |
| Vstm4   | NA   | 0.19 | 0    | 0.98 | NA   |
| Vsx1    | 0    | 0.13 | 0.33 | 0    | 1.97 |
| Vsx2    | NA   | NA   | NA   | 1.36 | NA   |
| Vta1    | NA   | NA   | 1.15 | 1.32 | 2.66 |
| Vtcn1   | NA   | 3.28 | 2.3  | 2.73 | 2.75 |
| Vti1a   | 0.64 | NA   | 0.22 | 0.22 | 1.08 |
| Vti1b   | 0.02 | 2.07 | 3.35 | 0.79 | 0    |
| Vtn     | 0    | 2.83 | 1.58 | 0.71 | 3.7  |
| Vwa1    | NA   | 0.8  | 0.1  | 1.39 | 3.14 |
| Vwa2    | NA   | NA   | NA   | 1.37 | NA   |
| Vwa3a   | NA   | NA   | 1    | 1.56 | 0    |
| Vwa3b   | NA   | NA   | 0.86 | 0.51 | NA   |
| Vwa5a   | NA   | 0    | 1.66 | 3.25 | 1.05 |
| Vwa5b1  | NA   | NA   | NA   | 1.23 | NA   |
| Vwa5b2  | NA   | NA   | 0.6  | 0.07 | 3.4  |
| Vwa7    | NA   | 0.47 | 0.02 | NA   | NA   |
| Vwa8    | NA   | 0    | 2.11 | 0    | NA   |
| Vwa9    | NA   | 0.63 | 1.4  | 0    | NA   |
| Vwc2    | NA   | NA   | NA   | 3.75 | NA   |
| Vwc2l   | NA   | NA   | NA   | 2.02 | NA   |
| Vwce    | NA   | NA   | 2.12 | 0.27 | 0    |
| Vwde    | NA   | NA   | NA   | 1.51 | NA   |
| Vwf     | 0.9  | 0.02 | 0.89 | 0.61 | 0    |
| Wac     | 0.34 | 0.18 | 1.11 | 0.33 | 0    |
| Wapal   | NA   | 0.85 | 1.09 | 0    | 0.54 |
| Wars    | 0.29 | 0.63 | 1.49 | 0.52 | 0.51 |
| Wars2   | NA   | 0.34 | 0.25 | 0.11 | 0    |
| Was     | 0.06 | 0.95 | 2.34 | 0.2  | 0.96 |
| Wasf1   | 0.51 | 2.62 | 0.14 | 4.68 | 0.65 |



|         |      |      |      |      |      |
|---------|------|------|------|------|------|
| Wasf2   | 0.53 | 0.47 | 1.46 | 0.75 | 0.55 |
| Wasf3   | 1.81 | 1.35 | 0.35 | 1.2  | 2.57 |
| Wasl    | 0    | 0.51 | 1.72 | 0.66 | 0    |
| Wbp1    | NA   | NA   | NA   | 0    | NA   |
| Wbp11   | 1.41 | 0    | 0.78 | 0.02 | 0    |
| Wbp11   | NA   | 0    | 1.53 | 0.58 | NA   |
| Wbp2    | 0    | 1.04 | 5.15 | 0    | 1.84 |
| Wbp2nl  | NA   | NA   | 1.26 | 3.13 | NA   |
| Wbp4    | 0.97 | 0.13 | 1.14 | 0.35 | 0.26 |
| Wbp5    | 0.01 | 0    | 1.6  | 0    | 1.42 |
| Wbscr16 | 0.38 | 2.73 | 0.91 | 0.67 | 0    |
| Wbscr17 | 0    | NA   | NA   | 0.54 | NA   |
| Wbscr18 | 0    | NA   | NA   | NA   | NA   |
| Wbscr22 | 0.32 | 3    | 1.49 | 1.23 | 1.48 |
| Wbscr27 | 1.57 | NA   | 0.95 | 4.21 | NA   |
| Wbscr28 | NA   | NA   | 0.69 | 1.28 | 3.09 |
| Wdfy1   | 0.17 | NA   | 1.38 | 0.8  | 1.07 |
| Wdfy2   | 0    | NA   | 1.76 | 0    | 0    |
| Wdfy3   | 0.44 | 0    | 1.16 | 1.26 | 0.02 |
| Wdfy4   | NA   | NA   | 0.54 | 0.71 | 1.12 |
| Wdhd1   | 0.37 | 1.14 | 1.46 | 0.05 | 0.09 |
| Wdpcp   | NA   | NA   | 1.56 | 1.88 | NA   |
| Wdr1    | 0.22 | 0.62 | 0.4  | 2.82 | 0    |
| Wdr11   | NA   | 0    | 2.28 | 0.01 | NA   |
| Wdr12   | 0    | 0.9  | 0.36 | 1.4  | 1.61 |
| Wdr13   | 0    | 3.44 | 2.58 | 0.21 | 0.62 |
| Wdr16   | NA   | NA   | 0.39 | 1.9  | 0    |
| Wdr17   | 0.14 | NA   | 0    | 3.01 | NA   |
| Wdr18   | 0    | 1.29 | 0.87 | 1.69 | 2.47 |
| Wdr19   | 0.46 | 2.33 | 0.92 | 0    | 0    |
| Wdr20   | 0    | NA   | NA   | NA   | NA   |
| Wdr22   | 0    | NA   | NA   | NA   | NA   |
| Wdr23   | 0    | NA   | NA   | NA   | NA   |
| Wdr24   | NA   | NA   | 2.25 | 2.97 | 2.99 |
| Wdr25   | NA   | 0.14 | 4.22 | 0.5  | 1.95 |
| Wdr26   | 0    | 0.78 | 1.05 | 2.34 | 0.08 |
| Wdr27   | NA   | NA   | 2.5  | 2.99 | 0    |
| Wdr3    | 0    | 2.56 | 2.49 | 1.09 | 0    |
| Wdr31   | 2.03 | NA   | 0.38 | 0.23 | 0    |
| Wdr33   | NA   | 0.01 | 0.05 | 0.09 | 1.12 |
| Wdr34   | 0    | NA   | 1.5  | 0.06 | 0    |

|        |      |      |      |      |      |
|--------|------|------|------|------|------|
| Wdr35  | 1.93 | NA   | 0.8  | 0    | 1.21 |
| Wdr36  | 0.03 | NA   | 0.49 | 0.61 | 4.09 |
| Wdr37  | 0.84 | 0.95 | 1.4  | 0.39 | 1.35 |
| Wdr38  | NA   | NA   | 0.23 | 1.62 | 2.29 |
| Wdr4   | 0    | 1.26 | 0.41 | 2.54 | 0.95 |
| Wdr40a | 0.78 | NA   | NA   | NA   | NA   |
| Wdr40b | 1.07 | NA   | NA   | NA   | NA   |
| Wdr41  | 0    | 0.14 | 1.55 | 1.57 | 0.12 |
| Wdr42a | 0    | NA   | NA   | NA   | NA   |
| Wdr43  | NA   | 1.33 | 0.04 | 1.23 | 2.27 |
| Wdr44  | 0.25 | 1.18 | 0.66 | 0.77 | 0    |
| Wdr45  | NA   | 0.87 | 0.84 | 1.51 | 0.88 |
| Wdr45b | NA   | 2.32 | 1.54 | 0.96 | NA   |
| Wdr45l | NA   | NA   | NA   | NA   | 2.88 |
| Wdr46  | NA   | 0.93 | 1.22 | 1.48 | 0    |
| Wdr47  | NA   | 0.74 | 1.9  | 0.49 | 0.08 |
| Wdr48  | NA   | 0.48 | 0.97 | NA   | 0.01 |
| Wdr49  | NA   | NA   | NA   | 0    | NA   |
| Wdr5   | 0.34 | NA   | 0.1  | 2.64 | 2.42 |
| Wdr52  | NA   | NA   | NA   | 1    | NA   |
| Wdr53  | NA   | NA   | 1.59 | 0.58 | 0    |
| Wdr54  | NA   | NA   | 1.23 | 0    | 3.48 |
| Wdr55  | NA   | 1.09 | 0.5  | NA   | 0.76 |
| Wdr59  | NA   | 0    | 2.05 | 0    | 5.43 |
| Wdr5b  | 0.6  | 0.82 | 1.67 | 1.63 | 0    |
| Wdr6   | NA   | 0    | 3.15 | 2.47 | 0    |
| Wdr60  | NA   | 3.25 | 0.01 | 0    | 2.38 |
| Wdr61  | NA   | 0.63 | 0.76 | 1.28 | 0    |
| Wdr62  | NA   | 1.21 | 2.04 | 0    | 0    |
| Wdr63  | NA   | NA   | 0.42 | 1.39 | 0.32 |
| Wdr64  | NA   | NA   | 1.96 | 0    | NA   |
| Wdr65  | NA   | NA   | 1.57 | 0.38 | NA   |
| Wdr66  | NA   | NA   | 0.59 | 1.92 | 0.55 |
| Wdr67  | NA   | 0    | 1.27 | 0.93 | 0    |
| Wdr69  | NA   | NA   | NA   | NA   | 0    |
| Wdr7   | 0    | 0.55 | 1.2  | 1.82 | 2.86 |
| Wdr70  | NA   | 0.45 | 0    | 0.43 | 2.2  |
| Wdr72  | NA   | NA   | NA   | 2    | NA   |
| Wdr73  | NA   | 0    | 2.05 | 0.69 | 0    |
| Wdr74  | NA   | 2.03 | 1.33 | 1.19 | 0    |
| Wdr75  | NA   | NA   | 1.41 | 0.47 | 0    |

|         |      |      |      |      |      |
|---------|------|------|------|------|------|
| Wdr76   | NA   | 2.39 | 0.22 | 0.93 | 0    |
| Wdr77   | NA   | 2    | 1.66 | 1.09 | 2.08 |
| Wdr78   | NA   | 0.91 | 0.42 | 0.08 | 2.71 |
| Wdr8    | 0.23 | NA   | NA   | NA   | 0    |
| Wdr81   | NA   | NA   | 1.98 | 0.5  | 0    |
| Wdr82   | NA   | 0    | 3.29 | 0.87 | 2.37 |
| Wdr83   | NA   | NA   | 0    | 2.56 | NA   |
| Wdr85   | NA   | NA   | 0    | NA   | 0    |
| Wdr86   | NA   | NA   | 1.46 | 0.93 | 4.47 |
| Wdr88   | NA   | NA   | NA   | 3.49 | NA   |
| Wdr89   | NA   | NA   | 0.64 | 0.48 | 0    |
| Wdr90   | NA   | NA   | 2.71 | 0.7  | 3.11 |
| Wdr91   | NA   | 0    | 0    | 0    | 0    |
| Wdr92   | NA   | NA   | 0.38 | 0.64 | 0.68 |
| Wdr93   | NA   | NA   | NA   | 0    | NA   |
| Wdr96   | NA   | NA   | NA   | 0.49 | NA   |
| Wdsub1  | NA   | NA   | 3.19 | 1.06 | 0    |
| Wdte1   | 0.26 | 0.64 | 0.78 | 0    | 0    |
| Wdyhv1  | NA   | 2.46 | 0.92 | 0.78 | 0    |
| Wee1    | 0    | 0    | 0.26 | 0    | 0    |
| Wfdc1   | 2.14 | 1.47 | 0.86 | 1.4  | 0    |
| Wfdc11  | NA   | NA   | NA   | 1.01 | NA   |
| Wfdc12  | 0.38 | NA   | 0.59 | 0    | NA   |
| Wfdc2   | NA   | 1.09 | 1.24 | 1.34 | 2.72 |
| Wfdc3   | NA   | NA   | 0    | 1.08 | 0    |
| Wfdc5   | 1.57 | NA   | 1.86 | 5.14 | 3.43 |
| Wfdc8   | NA   | NA   | NA   | 4.96 | NA   |
| Wfdc9   | NA   | NA   | NA   | 8.09 | NA   |
| Wfikkn1 | 0.46 | NA   | 2.36 | 0.53 | NA   |
| Wfikkn2 | 0    | NA   | 0.87 | 0.61 | 0.03 |
| Wfs1    | 1.09 | 1.94 | 1.4  | 0    | 2.29 |
| Whamm   | NA   | NA   | 0    | 1.67 | 2.1  |
| Whsc1   | 1.26 | 0.48 | 1.61 | 0    | 0    |
| Whsc111 | 0.52 | 1.18 | 0.23 | 1.38 | 2.11 |
| Whsc2   | 0    | NA   | NA   | NA   | 6.17 |
| Wibg    | NA   | NA   | 3.57 | 3.56 | 0    |
| Wif1    | 3.15 | 0    | 2.03 | 1.63 | 1.59 |
| Wipf1   | NA   | 0    | 0.9  | 2.05 | 0    |
| Wipf2   | NA   | 1.29 | 0.21 | 1.64 | 0.25 |
| Wipf3   | NA   | NA   | 1.29 | 1.16 | 0    |
| Wipi1   | NA   | 1.82 | 1.12 | 0    | 0.5  |

|        |      |      |      |      |      |
|--------|------|------|------|------|------|
| Wipi2  | NA   | 0.16 | 0.28 | 1.18 | 0    |
| Wisp1  | 0.57 | 1.16 | 2.3  | 1.12 | 4.26 |
| Wisp2  | 0.01 | 2.19 | 0.06 | 1.52 | 2.27 |
| Wisp3  | NA   | 0.15 | 0.67 | 2.07 | 0    |
| Wiz    | NA   | 0.38 | 0.09 | 0.8  | 0.5  |
| Wls    | NA   | 1.64 | 2.43 | 2.51 | NA   |
| Wnk1   | NA   | 0.54 | 0.43 | 1.45 | 1.36 |
| Wnk2   | NA   | NA   | 0.69 | 1.34 | 0    |
| Wnk3   | NA   | NA   | NA   | 0    | NA   |
| Wnk4   | NA   | NA   | 3.45 | 0.91 | 0    |
| Wnt1   | 3.23 | 1.49 | 0    | 0.32 | 4.23 |
| Wnt10a | 0.74 | NA   | 0.87 | 3.18 | 0.98 |
| Wnt10b | 1.88 | 0.56 | 3.15 | 0.94 | 0    |
| Wnt11  | 1.17 | 2.47 | 1.62 | 1.39 | 0    |
| Wnt16  | 0.04 | 0.2  | 0.7  | 3.78 | 0.39 |
| Wnt2   | 1.14 | 2.11 | 0.24 | 1.41 | 3.58 |
| Wnt2b  | 0.18 | 1.32 | 0.49 | 2.69 | 4.86 |
| Wnt3   | 0.78 | 1.65 | 1.06 | 1.1  | 2.44 |
| Wnt3a  | 1.45 | NA   | NA   | 3.04 | NA   |
| Wnt4   | 0.48 | 0.93 | 1.83 | 0    | 0    |
| Wnt5a  | 0.43 | 0    | 1.17 | 0    | 0    |
| Wnt5b  | 0.78 | 1.72 | 0.56 | 2.8  | 1.63 |
| Wnt6   | 1.44 | 0    | 0    | 0.93 | 0    |
| Wnt7a  | 3.71 | 0.44 | 1.65 | 1.2  | 0.95 |
| Wnt7b  | 2.66 | NA   | 1.27 | 1.51 | 3.38 |
| Wnt8a  | 0    | NA   | 0.68 | 0    | 2.97 |
| Wnt8b  | 1.82 | 1.01 | 0.47 | 0.87 | 1.6  |
| Wnt9a  | 0.33 | NA   | 1.35 | 0.89 | 1.43 |
| Wnt9b  | 0.02 | NA   | 0.06 | 2.02 | NA   |
| Wrap53 | NA   | 0    | 0.9  | 1.52 | 0.75 |
| Wrap73 | NA   | 1.47 | 0.69 | 0.74 | NA   |
| Wrb    | 0    | 1.22 | 0.4  | 1.08 | 0    |
| Wrn    | 0.07 | 0.02 | 0.31 | 0.77 | 2.28 |
| Wrnip1 | 0.08 | 1.22 | 1.26 | 0.57 | 0.58 |
| Wsb1   | 0.27 | 0    | 0.36 | 0.84 | 2.9  |
| Wsb2   | 1.78 | 0.05 | 1.71 | 0.79 | 0.5  |
| Wscd1  | NA   | 1.68 | 0.7  | 0.12 | 1.64 |
| Wscd2  | NA   | 0.66 | 1.29 | 0.31 | 0    |
| Wt1    | 0.9  | 0.68 | 1.24 | 1.19 | 2.49 |
| Wtap   | 0    | 0.74 | 1.82 | 0.24 | 0    |
| Wtip   | 1.62 | NA   | 2.68 | 1.85 | 1.84 |

|         |      |      |      |       |      |
|---------|------|------|------|-------|------|
| Wwc1    | NA   | 1.03 | 1.37 | 0     | 1.57 |
| Wwc2    | NA   | 1.84 | 1.78 | 2.38  | 1.02 |
| Wwox    | 0.38 | 0    | 1.04 | 0.21  | 0    |
| Wwp1    | 0    | 0    | 2.91 | 0.51  | 0    |
| Wwp2    | NA   | 0    | 1.19 | 2.51  | 0.66 |
| Wwtr1   | NA   | 0.51 | 0.61 | 1.35  | 1.31 |
| Xab1    | 0.16 | NA   | NA   | NA    | NA   |
| Xab2    | 0.63 | 0    | 1.5  | 0     | 1.18 |
| Xaf1    | NA   | 0.41 | 0.52 | 0     | 0    |
| Xbp1    | 1    | 3.17 | 2.45 | 0.39  | 0    |
| Xcl1    | 0    | 2.19 | 1.76 | 0.79  | 3.88 |
| Xcr1    | 3.96 | 1.28 | 1.35 | 0.23  | 0    |
| Xdh     | 0.5  | 3.27 | 1.47 | 0.55  | 0    |
| Xiap    | NA   | 0.67 | 0.79 | 0.02  | 0    |
| Xirp1   | NA   | NA   | 0    | 2.02  | 0    |
| Xirp2   | NA   | NA   | NA   | 2.39  | NA   |
| Xist    | 0.15 | 0.2  | 0.42 | NA    | 1.87 |
| Xk      | NA   | 2.14 | 1.1  | 1.69  | 0.87 |
| Xkr4    | NA   | NA   | 0.77 | 0.05  | 0    |
| Xkr5    | NA   | NA   | NA   | 0.96  | NA   |
| Xkr6    | NA   | NA   | 1.98 | 0.92  | 0.59 |
| Xkr7    | NA   | NA   | NA   | 1.38  | NA   |
| Xkr8    | NA   | 1.29 | 1.54 | 0.67  | 7.79 |
| Xkr9    | NA   | NA   | NA   | 0.86  | NA   |
| Xkrx    | NA   | NA   | 6.27 | 0     | 2.22 |
| Xlkd1   | 2.07 | NA   | NA   | NA    | NA   |
| Xpa     | 0    | 0.37 | 0.93 | NA    | 3.81 |
| Xpc     | 0    | 0    | 2.76 | 0     | 0    |
| Xpnpep1 | 0.74 | 0.77 | 0.52 | 0.02  | 0.54 |
| Xpnpep2 | 0    | 1.63 | 1.51 | 0.44  | 0    |
| Xpnpep3 | NA   | 2.26 | 0.38 | 1.12  | 1.66 |
| Xpo1    | 0    | 0.98 | 0.72 | 0.5   | 0    |
| Xpo4    | 1.7  | 0.81 | 0    | 10.87 | 1.41 |
| Xpo5    | 1.18 | NA   | 0.05 | 3.78  | 0    |
| Xpo6    | 1.07 | 0    | 2.1  | 1.76  | 0    |
| Xpo7    | 1.07 | 0.08 | 0.43 | 0.39  | 0    |
| Xpot    | NA   | 1.45 | 2.04 | 2.09  | 2.78 |
| Xpr1    | 0.43 | NA   | 1.54 | 0.87  | 0    |
| Xrcc1   | 0.63 | 0    | 2.09 | 0.12  | 1.63 |
| Xrcc2   | 0.75 | 1.36 | 1.89 | 0.69  | 0    |
| Xrcc3   | 0    | 0.9  | 0.73 | 1.6   | 0.03 |

|          |       |      |      |      |       |
|----------|-------|------|------|------|-------|
| Xrcc4    | 0     | 0.01 | 1.97 | 1.48 | 0     |
| Xrcc5    | 21.66 | 2.52 | 0.46 | 0.41 | 1.43  |
| Xrcc6    | NA    | 0    | 1.47 | 1.3  | 0     |
| Xrcc6bp1 | NA    | NA   | 1.2  | 0.82 | 7.8   |
| Xrn1     | 0     | NA   | 0.9  | 1.03 | 1.67  |
| Xrn2     | 0.45  | NA   | 0.92 | 0.59 | 3.73  |
| Xxylt1   | NA    | NA   | 0.05 | 2.43 | NA    |
| Xylb     | 0     | 0.53 | 4.99 | 1.79 | 2.71  |
| Xylt1    | 4.06  | NA   | NA   | 1.97 | NA    |
| Xylt2    | 1.06  | 0    | 2.26 | 0.49 | 10.32 |
| Yae1d1   | NA    | NA   | 1.06 | 1.03 | NA    |
| Yaf2     | 0.61  | 2.32 | 2.83 | 1.07 | 1.55  |
| Yap1     | 0     | 1.57 | 0.72 | 1.38 | 1.27  |
| Yars     | 0.79  | 3.15 | 0.9  | 0.47 | 2.18  |
| Yars2    | NA    | 1.56 | 3.76 | 1.19 | 0     |
| Ybey     | NA    | NA   | 2.36 | 2.03 | NA    |
| Ybx1     | NA    | 0    | 0.34 | 0    | 2.6   |
| Ybx2     | 2.28  | 1.82 | 1    | 0    | NA    |
| Ybx3     | NA    | 0.58 | 0.71 | 0    | NA    |
| Ydjc     | NA    | NA   | 3.02 | NA   | 3.31  |
| Yeats2   | 0.68  | 0    | 0.38 | 0    | 3.54  |
| Yeats4   | 0.29  | 1.26 | 0.88 | 0.86 | 0     |
| Yes1     | NA    | 0.88 | 0.69 | 1.91 | 0     |
| Yif1a    | NA    | 2.22 | 2.67 | 1.77 | 0     |
| Yif1b    | NA    | 0.18 | 0.01 | 0.39 | 1.02  |
| Yipf1    | NA    | 0    | 1.42 | 1.95 | 2.22  |
| Yipf2    | NA    | 0.93 | 4.04 | 1.57 | 3.24  |
| Yipf3    | NA    | 0.73 | 1.68 | 4.48 | 2.79  |
| Yipf4    | NA    | 1.14 | 1.74 | 0    | 1.99  |
| Yipf5    | NA    | 1.25 | 2.21 | 1.95 | 0.44  |
| Yipf6    | NA    | 0.89 | 1.4  | 0    | 0     |
| Yipf7    | NA    | NA   | NA   | 0.11 | NA    |
| Yjefn3   | NA    | NA   | 2.01 | 0.66 | 2.19  |
| Ykt6     | NA    | 0    | 1.24 | 2.04 | 0     |
| Ylpm1    | NA    | 0    | 1.01 | 1.22 | 1.77  |
| Yme1l1   | 0.17  | 0.77 | 1.31 | 1.39 | 0     |
| Yod1     | NA    | 1.85 | 0.84 | 0.49 | 7.14  |
| Ypel1    | 1.9   | 0    | 0.46 | 0.91 | 0     |
| Ypel2    | NA    | NA   | 1.57 | 0    | 5.9   |
| Ypel3    | 0.66  | NA   | 2.06 | 0.65 | 0.46  |
| Ypel4    | NA    | NA   | 2.64 | 0.07 | 0     |

|        |      |      |      |      |      |
|--------|------|------|------|------|------|
| Ypel5  | 0.08 | 2.56 | 1.53 | 0    | 0    |
| Yrdc   | NA   | 1.55 | 2.99 | 2.44 | 3.82 |
| Ysk4   | 1.48 | NA   | NA   | NA   | NA   |
| Ythdc1 | NA   | 1.72 | 0.96 | 0.52 | 0.53 |
| Ythdc2 | 0    | 0.74 | 0.64 | 1.13 | 0    |
| Ythdf1 | 1.37 | 2.03 | 2.18 | 0.83 | 1.74 |
| Ythdf2 | 0    | 1.78 | 1.62 | 0    | 2.54 |
| Ythdf3 | 0    | 0    | 1.99 | 0.47 | 2.85 |
| Ywhab  | 0    | 1.73 | 1    | 0.12 | 0    |
| Ywhae  | 0.1  | 0.92 | 1.89 | 1.1  | 0.21 |
| Ywhag  | 0.48 | NA   | 1.67 | 1.22 | 0    |
| Ywhah  | 0    | 0.49 | 1.03 | 0.51 | 0.61 |
| Ywhaq  | 0    | 1.91 | 2.22 | NA   | 0    |
| Ywhaz  | 1.11 | 0    | 4.86 | 1.28 | 1.26 |
| Yy1    | 0    | 0    | 0.56 | 1.35 | 2.14 |
| Yy2    | NA   | 0.47 | 0.19 | 3.6  | NA   |
| Zadh1  | 1.29 | NA   | NA   | NA   | NA   |
| Zadh2  | 0    | NA   | 2.53 | 1.08 | 0    |
| Zan    | 2.81 | NA   | 0    | 1.33 | 3.14 |
| Zap70  | 0.99 | 0    | 0.4  | 1.21 | 3    |
| Zar1   | 7.06 | NA   | 1.44 | 0    | NA   |
| Zar11  | NA   | NA   | NA   | 0.29 | NA   |
| Zbbx   | NA   | 0.39 | 2.85 | 3.57 | 3.92 |
| Zbed3  | 0    | NA   | 2.39 | 3.93 | 0.24 |
| Zbed4  | 0.25 | 0.04 | 1.87 | NA   | 0.25 |
| Zbed6  | NA   | NA   | 0.11 | NA   | NA   |
| Zbp1   | 0    | 0.6  | 0.97 | 0.86 | 0.03 |
| Zbtb1  | 0    | 1.16 | 1.4  | 0    | 0.06 |
| Zbtb10 | 0.39 | 1.43 | 0.93 | 3.14 | 1.29 |
| Zbtb11 | 1.77 | 1.12 | 1.18 | 0.47 | 1.62 |
| Zbtb12 | NA   | NA   | 1.77 | 1.78 | 5.19 |
| Zbtb14 | NA   | 0.05 | 0.8  | 0.39 | NA   |
| Zbtb16 | 2.98 | 0.96 | 1.13 | 1.38 | 0.64 |
| Zbtb17 | 1.12 | 1.32 | 1.06 | 2.94 | 1.17 |
| Zbtb18 | NA   | 0.01 | 4.4  | 0    | NA   |
| Zbtb2  | NA   | NA   | 1.93 | 0.71 | 1.99 |
| Zbtb20 | NA   | 0.44 | 1.44 | 0.94 | 0.82 |
| Zbtb21 | NA   | NA   | 4.9  | 1.66 | NA   |
| Zbtb22 | NA   | 0.62 | 0.74 | 1.15 | 0    |
| Zbtb24 | 0    | 0.03 | 1.04 | 0.87 | 2.69 |
| Zbtb25 | NA   | 0    | 0.83 | 0    | 0    |

|         |      |      |      |      |       |
|---------|------|------|------|------|-------|
| Zbtb26  | NA   | NA   | 1.66 | 1.75 | 0     |
| Zbtb3   | 0    | 0.27 | 0.28 | 0    | 3.67  |
| Zbtb32  | NA   | 1.97 | 0    | 0.53 | 0     |
| Zbtb33  | 1.39 | 0.78 | 0.46 | 1.48 | 0.83  |
| Zbtb34  | NA   | NA   | 1.38 | 1.75 | 2.28  |
| Zbtb37  | 0    | NA   | 0.46 | 0.68 | 2.43  |
| Zbtb38  | NA   | 0.11 | 0.61 | 0    | 8.47  |
| Zbtb39  | NA   | 0    | 2.54 | 1.97 | 3.58  |
| Zbtb4   | 1.39 | NA   | 0.55 | 1.24 | 0     |
| Zbtb40  | NA   | 0    | 0.38 | 0    | NA    |
| Zbtb41  | NA   | NA   | 1.91 | 1.51 | 0     |
| Zbtb42  | NA   | NA   | 1.06 | 0.73 | 0     |
| Zbtb43  | NA   | 1.27 | 0.38 | 0    | 0     |
| Zbtb44  | NA   | 1.77 | 0.68 | 0.95 | 0     |
| Zbtb45  | NA   | NA   | 3.42 | 2.05 | 0.41  |
| Zbtb46  | NA   | NA   | 0.04 | 2.53 | 0     |
| Zbtb48  | NA   | 2.83 | 3.65 | 4.92 | 2.65  |
| Zbtb49  | NA   | NA   | 0.64 | 0.54 | NA    |
| Zbtb5   | 0.07 | 0    | 0.26 | 0.14 | 18.94 |
| Zbtb6   | NA   | 2.85 | 1.69 | 0.05 | 0     |
| Zbtb7a  | NA   | 0.67 | 1.27 | 1.82 | 1.15  |
| Zbtb7b  | NA   | 0.39 | 0    | 1.47 | 0     |
| Zbtb7c  | NA   | 0.37 | 0.76 | 1.55 | 0     |
| Zbtb8   | 0.95 | NA   | NA   | NA   | NA    |
| Zbtb8a  | NA   | NA   | 1.65 | NA   | 2.82  |
| Zbtb8b  | NA   | NA   | 4.02 | 0    | NA    |
| Zbtb8os | NA   | NA   | 1.67 | 1.73 | 1.28  |
| Zbtb9   | NA   | NA   | 1.93 | 0.9  | 1.3   |
| Zc2hc1a | NA   | 0.92 | 0.28 | 1.04 | NA    |
| Zc2hc1b | NA   | NA   | 2.22 | 0    | NA    |
| Zc2hc1c | NA   | 1.48 | 1.37 | 1.32 | NA    |
| Zc3h10  | NA   | NA   | 1.2  | 0    | 1.49  |
| Zc3h11a | NA   | 0.85 | 1.5  | 0.85 | 0     |
| Zc3h12a | NA   | 0.08 | 0.38 | 2.6  | 0     |
| Zc3h12b | NA   | NA   | NA   | 0.05 | NA    |
| Zc3h12c | NA   | NA   | 1.05 | 1.2  | 2.26  |
| Zc3h12d | NA   | NA   | 2.35 | 0    | NA    |
| Zc3h13  | NA   | 0    | 0.79 | 0.05 | 0     |
| Zc3h14  | NA   | 0    | 3.76 | 0    | 4.28  |
| Zc3h15  | NA   | 1.03 | 1.7  | 0.78 | 0     |
| Zc3h18  | NA   | NA   | 3.18 | 0.79 | 0     |



|          |      |      |      |      |      |
|----------|------|------|------|------|------|
| Zc3h3    | NA   | 2.86 | 3.18 | 0.86 | 2.72 |
| Zc3h4    | NA   | 0    | 1.36 | 1.41 | 0    |
| Zc3h6    | NA   | NA   | 1.27 | 1.07 | 1.92 |
| Zc3h7a   | NA   | 0    | 1.79 | 1.1  | 2.9  |
| Zc3h7b   | NA   | 0.37 | 1    | 1.21 | 0    |
| Zc3h8    | NA   | NA   | 1.53 | 0.65 | 4.49 |
| Zc3hav1  | 0    | 1.07 | 1.79 | 0    | 0    |
| Zc3hav11 | NA   | NA   | 0.94 | 0.34 | 3.69 |
| Zc3hc1   | NA   | NA   | 0.97 | 2.01 | 3.63 |
| Zc4h2    | NA   | 0    | 4.02 | 0.68 | 0    |
| Zcchc10  | NA   | 0    | 1.07 | 0.05 | 3.44 |
| Zcchc11  | 0.91 | 0.58 | 1.19 | 0.74 | 1.65 |
| Zcchc12  | 6.61 | NA   | 2.59 | 1.78 | 0    |
| Zcchc13  | NA   | NA   | 1.21 | 2.79 | NA   |
| Zcchc14  | 0    | 0    | 0.23 | 1.06 | 0.75 |
| Zcchc16  | NA   | NA   | NA   | 0.76 | NA   |
| Zcchc17  | NA   | NA   | 1.58 | 0.56 | 0    |
| Zcchc18  | NA   | NA   | 0.14 | 0.53 | 0.32 |
| Zcchc2   | 2.81 | 1.54 | 5.16 | 0    | 0    |
| Zcchc24  | NA   | 0.17 | 0.86 | 0.59 | 2.25 |
| Zcchc3   | 0.48 | NA   | 2.11 | 0    | 0    |
| Zcchc4   | 0.34 | 0.02 | 1.63 | 1.15 | 2.5  |
| Zcchc5   | 0    | NA   | 0.39 | 2.41 | NA   |
| Zcchc6   | 0.67 | 0.03 | 0.59 | 0.74 | 0.18 |
| Zcchc7   | 0    | NA   | 0.19 | 0    | 1.64 |
| Zcchc8   | 1.61 | 0    | 1.37 | 0.95 | 0    |
| Zcchc9   | 0.1  | NA   | 2.42 | 0.8  | 0    |
| Zcrb1    | NA   | NA   | 0.41 | 0    | 2.13 |
| Zcwpw1   | NA   | NA   | NA   | 1.17 | NA   |
| Zcwpw2   | NA   | 1.57 | 3.77 | 4.19 | 0.88 |
| Zdbf2    | NA   | NA   | 2.41 | 0.48 | 2.88 |
| Zdhhc1   | 0.13 | NA   | 0.41 | 5.82 | 0    |
| Zdhhc11  | 0.61 | 0.02 | 1.16 | 0.49 | 0.85 |
| Zdhhc12  | 0.39 | NA   | 1.63 | 0.1  | 0.22 |
| Zdhhc13  | 0.7  | 0    | 0.68 | 0.69 | 0.55 |
| Zdhhc14  | 0    | 1.49 | 2.43 | 0.15 | 2.25 |
| Zdhhc15  | 2.85 | NA   | 0    | 0.67 | NA   |
| Zdhhc16  | 0.4  | NA   | 0.97 | 0    | 3    |
| Zdhhc17  | NA   | 1.14 | 1.44 | 0.26 | 0.57 |
| Zdhhc18  | NA   | 1.43 | 0.1  | 1.46 | 0    |
| Zdhhc19  | 0.97 | NA   | 1.93 | 0.08 | 0.95 |

|         |      |      |      |      |      |
|---------|------|------|------|------|------|
| Zdhhc2  | 0    | NA   | 1.99 | 0.77 | 0.73 |
| Zdhhc20 | NA   | NA   | 1.08 | 0.85 | 0    |
| Zdhhc21 | 0.28 | NA   | 1.06 | 0.36 | 0.76 |
| Zdhhc22 | NA   | NA   | 2.61 | 2.12 | 2.48 |
| Zdhhc23 | NA   | NA   | 1.21 | 3.94 | 2.07 |
| Zdhhc24 | NA   | 0.94 | 0.15 | 0.93 | 0.58 |
| Zdhhc3  | 0.44 | 0.02 | 0.66 | 0.24 | 0    |
| Zdhhc4  | 1.31 | 0.38 | 0.48 | 0.57 | 0    |
| Zdhhc5  | 1.69 | NA   | 0.99 | 3.76 | 0.3  |
| Zdhhc6  | 0.12 | 0.54 | 0.32 | 0.3  | 0.08 |
| Zdhhc7  | 0.23 | 0.95 | 0.79 | 0.69 | 0    |
| Zdhhc8  | 0.8  | NA   | 2.05 | 0.79 | 0.66 |
| Zdhhc9  | 1.25 | NA   | 1.42 | 1.6  | 0.25 |
| Zeb1    | NA   | 0.65 | 0.7  | 0.34 | 1.09 |
| Zeb2    | NA   | 0.89 | 1.93 | 1.17 | 0.1  |
| Zer1    | NA   | 0.48 | 3.27 | 0.64 | 0    |
| Zfand1  | NA   | 0.14 | 1.42 | 0.57 | 4.59 |
| Zfand2a | NA   | NA   | 2.62 | 0.91 | 0    |
| Zfand2b | NA   | NA   | 2.97 | 1.25 | 4.16 |
| Zfand3  | NA   | 0    | 1.04 | 0.06 | 0    |
| Zfand4  | NA   | NA   | 1.64 | 0    | NA   |
| Zfand5  | NA   | 0.6  | 2.26 | 0    | 1.45 |
| Zfand6  | NA   | 1    | 1.41 | 1.61 | 0.92 |
| Zfat    | NA   | NA   | 0    | 0.31 | 0    |
| Zfc3h1  | NA   | 4.14 | 1.37 | 2.65 | 0    |
| Zfhx3   | NA   | 2.01 | 0.51 | 1.42 | 0.94 |
| Zfhx4   | NA   | 1.32 | 1.39 | 3.72 | 0.85 |
| Zfp1    | 0.67 | NA   | 2.82 | 1.16 | 1.06 |
| Zfp106  | 0    | NA   | NA   | NA   | 0.9  |
| Zfp112  | NA   | 2.15 | 0.78 | 3.2  | 0.19 |
| Zfp14   | NA   | NA   | 1.25 | 1.64 | 1.63 |
| Zfp161  | 0.15 | NA   | NA   | NA   | 0    |
| Zfp2    | 0.15 | 1.48 | 0    | 2.73 | 1.19 |
| Zfp28   | 0    | NA   | 1.09 | 0.23 | 0.57 |
| Zfp3    | NA   | NA   | 1.24 | 0    | 3.09 |
| Zfp30   | 2.72 | 1.71 | 1.96 | 0    | 0    |
| Zfp36   | NA   | 1.94 | 1.51 | 1.19 | 0    |
| Zfp3611 | 0.07 | 0.67 | 0.8  | 0    | 0    |
| Zfp3612 | NA   | 0    | 1.3  | 1.48 | 2.39 |
| Zfp37   | 0.51 | 1.01 | 1.23 | 0.64 | 0.92 |
| Zfp41   | 0.93 | NA   | 1.87 | 1.74 | 0.37 |

|         |      |      |      |      |      |
|---------|------|------|------|------|------|
| Zfp42   | 0    | NA   | 3.4  | 1.62 | 0.16 |
| Zfp57   | 4.13 | NA   | 0    | 1.07 | 0    |
| Zfp62   | NA   | NA   | 0.93 | 0    | 1.42 |
| Zfp64   | 0.89 | 0.02 | 0.02 | NA   | 0.08 |
| Zfp69   | NA   | NA   | 0.6  | 0.91 | NA   |
| Zfp82   | NA   | NA   | 1.72 | 1.3  | 1.24 |
| Zfp90   | 0    | NA   | 2.46 | 0.45 | 0    |
| Zfp91   | 1.42 | NA   | 0.72 | NA   | 0    |
| Zfp92   | NA   | NA   | NA   | 1.11 | NA   |
| Zfp11   | 0.92 | 1.49 | 1.77 | 6.49 | 1.18 |
| Zfpm1   | 0.34 | NA   | 0.71 | 0.83 | NA   |
| Zfpm2   | 0.98 | 1.22 | 0.96 | 2.43 | 0    |
| Zfr     | 1.74 | 0.9  | 0.66 | 0.97 | 0.49 |
| Zfr2    | NA   | 1.25 | 1.6  | 0.69 | 1.21 |
| Zfx     | 0.95 | 0.43 | 0.98 | 0.56 | 0    |
| Zfyve1  | 0    | NA   | 1.33 | 0.05 | 0.69 |
| Zfyve16 | 0    | 0.01 | 1.52 | 1.4  | 0    |
| Zfyve19 | 0    | NA   | 1.14 | 0.91 | 2.91 |
| Zfyve20 | 0    | NA   | 1.94 | 0.88 | 0    |
| Zfyve21 | 0    | 0.31 | 1.49 | 0.83 | 0    |
| Zfyve26 | 0    | 0.98 | 0.21 | 1.58 | 1.75 |
| Zfyve27 | 4.23 | NA   | 1.7  | 0.43 | 0    |
| Zfyve28 | 1.3  | NA   | 1.24 | 0.43 | 0    |
| Zfyve9  | 0.94 | 0.95 | 0    | 3.01 | 5.18 |
| Zg16    | NA   | 0.65 | 1.45 | 0    | 1.74 |
| Zglp1   | NA   | NA   | 1.35 | NA   | NA   |
| Zgpat   | NA   | 0    | 0.65 | 1.05 | NA   |
| Zhx1    | 0.18 | NA   | 1.96 | NA   | 2.41 |
| Zhx2    | 0    | 1.93 | 1.59 | 0    | 0    |
| Zhx3    | 0.06 | 0    | 0.8  | 0.15 | 0.88 |
| Zic1    | 2.4  | 0.23 | 0.9  | 0.33 | 1.49 |
| Zic2    | 1.11 | NA   | 1.63 | 0.94 | 1.45 |
| Zic3    | 0.11 | 1.3  | 1.19 | 0    | 2.01 |
| Zic4    | 1.4  | 0.99 | 2.46 | 0.05 | 1.79 |
| Zic5    | 5.25 | NA   | 1.26 | 0.98 | NA   |
| Zik1    | 0.9  | NA   | 3.34 | 0.74 | 0.2  |
| Zim2    | 1.72 | 2.58 | 0.18 | NA   | 0    |
| Zim3    | 0.23 | NA   | 0    | 0.02 | NA   |
| Zkscan1 | NA   | 0.97 | 1.14 | 0    | 0.03 |
| Zkscan2 | NA   | NA   | NA   | 0    | NA   |
| Zkscan3 | NA   | 2.06 | 0.78 | 0.8  | 0.18 |

|          |      |      |      |      |      |
|----------|------|------|------|------|------|
| Zkscan4  | NA   | 0.41 | 1.48 | 0    | 5.7  |
| Zkscan5  | NA   | 1    | 0.53 | 0    | 1.06 |
| Zkscan7  | NA   | NA   | NA   | 0.05 | NA   |
| Zkscan8  | NA   | 1.32 | 0.82 | 1.28 | NA   |
| Zmat1    | NA   | NA   | 0.68 | 0.19 | 1.45 |
| Zmat2    | 0    | NA   | 1.58 | 1.03 | 1.99 |
| Zmat3    | NA   | 0    | 1.99 | 0.83 | 2.16 |
| Zmat4    | NA   | 0.89 | 0    | 1.5  | 3.18 |
| Zmat5    | NA   | 2.78 | 3.11 | NA   | 1.09 |
| Zmiz1    | NA   | 0    | 0.99 | 1.22 | 0.5  |
| Zmiz2    | NA   | 0    | 2.04 | 1.16 | 2    |
| Zmpste24 | 0    | 0.03 | 1.12 | 1.05 | 2.09 |
| Zmym1    | 0.39 | 3.6  | 3.21 | 0.75 | 0    |
| Zmym2    | NA   | 1.56 | 1.49 | 0    | 0    |
| Zmym3    | NA   | 0    | 0.28 | 2.9  | 0    |
| Zmym4    | NA   | 0    | 1.88 | 0.62 | 1.84 |
| Zmym5    | NA   | 2.25 | 2.36 | 2.16 | 0.78 |
| Zmynd10  | 2.14 | 3.48 | 0.86 | 5.07 | 0    |
| Zmynd11  | 2.19 | 0    | 0.59 | 1.03 | 4.67 |
| Zmynd12  | NA   | NA   | 0.63 | 0.07 | 0.99 |
| Zmynd15  | NA   | NA   | 1.39 | 1.83 | 0    |
| Zmynd17  | 1.43 | NA   | NA   | NA   | 5.35 |
| Zmynd19  | 1.58 | NA   | 1.18 | 1.06 | 0    |
| Zmynd8   | NA   | 0.29 | 1.15 | 0    | 0    |
| Znf142   | 0.29 | NA   | NA   | NA   | NA   |
| Znf24    | 2.04 | NA   | NA   | NA   | NA   |
| Znf512b  | NA   | 0    | 0.13 | 2.45 | 0    |
| Znfx1    | NA   | NA   | 0.5  | 0    | 0    |
| Znhit1   | 1.16 | 0    | 0    | 1.31 | 2.39 |
| Znhit2   | 0.38 | 1.2  | 1.46 | 1.25 | 1.78 |
| Znhit3   | NA   | 0    | 2.64 | 1.81 | 0    |
| Znhit6   | NA   | 0    | 1.68 | 1.32 | 0    |
| Znrd1    | 0.29 | NA   | 1.11 | 2.87 | 0    |
| Znrf1    | 0.92 | NA   | 1.76 | 1.17 | 0.44 |
| Znrf2    | NA   | NA   | 2.56 | 1.72 | 0    |
| Znrf3    | NA   | NA   | 1.54 | 2.74 | NA   |
| Znrf4    | 1.41 | 2.92 | 0    | 2.79 | 0    |
| Zp1      | 0.74 | NA   | 0.24 | 1.85 | 5.22 |
| Zp2      | 3.44 | 1.79 | 3.61 | 1.33 | 4.32 |
| Zp3      | 0    | NA   | NA   | 1.37 | NA   |
| Zpbp     | 0.11 | 0.82 | 0.13 | 0.91 | 2.21 |

|         |      |      |      |      |       |
|---------|------|------|------|------|-------|
| Zpbp2   | NA   | NA   | 0.64 | 2.66 | 0     |
| Zpld1   | NA   | NA   | NA   | 1.83 | NA    |
| Zranb1  | 0    | NA   | 2.22 | 0    | 0.94  |
| Zranb2  | NA   | NA   | 2.46 | 0.91 | 0     |
| Zranb3  | 2.34 | NA   | 0.75 | 0.61 | 0.51  |
| Zrsr1   | NA   | 3.31 | 3.88 | 0    | 11.54 |
| Zrsr2   | NA   | 1    | 0.93 | 0.97 | 0.89  |
| Zscan10 | NA   | NA   | 0    | 1.29 | NA    |
| Zscan12 | NA   | 0.09 | 0.96 | 1.84 | 0.63  |
| Zscan18 | NA   | 0    | 3.17 | 0    | 0     |
| Zscan2  | NA   | 4.8  | 1.95 | 0    | 3     |
| Zscan20 | NA   | NA   | 2.8  | 1.88 | NA    |
| Zscan21 | NA   | NA   | 0.95 | 0.18 | 1.49  |
| Zscan22 | NA   | NA   | 1.07 | 5.62 | 2.68  |
| Zscan25 | NA   | NA   | 1.73 | 1.19 | NA    |
| Zscan26 | NA   | 0    | 2.17 | 0.38 | NA    |
| Zscan29 | NA   | NA   | 1.22 | 0.74 | 1.63  |
| Zscan30 | NA   | NA   | NA   | 3.24 | NA    |
| Zscan5b | NA   | NA   | NA   | 1.65 | NA    |
| Zswim1  | 0.4  | 2.2  | 0.18 | 7.64 | 5.16  |
| Zswim2  | 0.97 | NA   | 1.29 | 0.84 | NA    |
| Zswim3  | 0.89 | NA   | 0.14 | 0.06 | 1.92  |
| Zswim4  | 0.93 | NA   | 2.28 | 1.98 | 0     |
| Zswim5  | 1    | NA   | 0    | 0.92 | 2.29  |
| Zswim6  | 0    | NA   | 1.46 | 3.1  | 2.04  |
| Zswim7  | NA   | NA   | 1.53 | NA   | 0     |
| Zswim8  | NA   | 1.03 | 1.7  | 0.71 | NA    |
| Zufsp   | NA   | NA   | 2.51 | 0.58 | 2.04  |
| Zw10    | 3.89 | 0    | 1.41 | 0.1  | 1.25  |
| Zwilch  | NA   | 0.79 | 2.84 | NA   | 0     |
| Zwint   | 0.35 | 1.38 | 0.72 | 0.45 | 0.04  |
| Zxda    | 0.42 | NA   | 1.92 | 0.79 | NA    |
| Zxdb    | NA   | 0    | 1.4  | NA   | 0.82  |
| Zxdc    | NA   | 0.6  | 0.59 | 0.86 | 0     |
| Zyg11a  | NA   | NA   | 0    | 2.26 | 0     |
| Zyg11b  | NA   | NA   | 2.14 | 0    | 0     |
| Zyx     | 0.33 | 0.94 | 0.44 | 1.47 | 0     |
| Zzef1   | 0.7  | 0.73 | 1.93 | 0    | 0.49  |
| Zzz3    | 0    | 0.8  | 1.56 | 0.69 | 0     |

---
