# Supplementary material for: Evidence-Based Translation for the Genomic Responses of Murine Models for the Study of Human Immunity
Source: PubMed Central journal article supplement (PMC4332676; doi:10.1371/journal.pone.0118017), 2015-02-13
Supplement: pone.0118017.s004.pdf [file pone.0118017.s004.pdf]

**Table S2. Genes benefited by EBT.**

| Symbol    | Name                                                       |
|-----------|------------------------------------------------------------|
| AP2M1     | Adaptor-Related Protein Complex 2, Mu 1 Subunit            |
| CXCL10    | chemokine (C-X-C motif) ligand 10                          |
| IFITM2    | Interferon Induced Transmembrane Protein 2                 |
| IFITM3    | Interferon Induced Transmembrane Protein 3                 |
| IL1RN     | Interleukin 1 Receptor Antagonist                          |
| LGALS38BP | Lectin, Galactoside-Binding, Soluble, 3 Binding Protein    |
| LPIN1     | Lipin 1                                                    |
| PSMD5     | proteasome (prosome, macropain) 26S subunit, non-ATPase, 5 |
