# Supplementary material for: Evidence-Based Translation for the Genomic Responses of Murine Models for the Study of Human Immunity
Source: PubMed Central journal article supplement (PMC4332676; doi:10.1371/journal.pone.0118017), 2015-02-13
Supplement: pone.0118017.s005.pdf [file pone.0118017.s005.pdf]

**Table S3. Top 5 biological functions enriched in the benefited genes by EBT.**

P-values for enrichment were calculated by Fisher's exact tests.

| Category                           | Gene Set                                                  | P-Value                |
|------------------------------------|-----------------------------------------------------------|------------------------|
| Canonical Pathways                 | Immune System                                             | $6.15 \times 10^{-28}$ |
|                                    | Cytokine Signaling in Immune System                       | $2.19 \times 10^{-21}$ |
|                                    | Interferon Signaling                                      | $6.98 \times 10^{-15}$ |
|                                    | Metabolism of RNA                                         | $1.36 \times 10^{-13}$ |
|                                    | Metabolism of mRNA                                        | $9.45 \times 10^{-12}$ |
| Gene Ontology Biological Processes | Bipolymer Metabolic Processes                             | $3.27 \times 10^{-19}$ |
|                                    | Protein Metabolic Process                                 | $5.29 \times 10^{-15}$ |
|                                    | Cellular Macromolecule Metabolic Process                  | $4.07 \times 10^{-14}$ |
|                                    | Nucleobase/side/tide and Nucleic Acid Metabolic Processes | $1.95 \times 10^{-16}$ |
|                                    | Cellular Macromolecule Metabolic Process                  | $2.16 \times 10^{-13}$ |
