# Supplementary material for: Evidence-Based Translation for the Genomic Responses of Murine Models for the Study of Human Immunity
Source: PubMed Central journal article supplement (PMC4332676; doi:10.1371/journal.pone.0118017), 2015-02-13
Supplement: pone.0118017.s006.pdf [file pone.0118017.s006.pdf]

**Table S4. Factors contributing to EBT.**

The improvement of agreement percentages of the overall and specific responses were linearly modeled with rank correlation coefficients of genomic responses between mouse and human experiments as well as between training and test experiments. P-values were calculated against the null effects of the factors.

|                   | Factor<br>(rank correlation of genomic responses between ...) | P-value                |
|-------------------|---------------------------------------------------------------|------------------------|
| Overall response  | Mouse and human experiments in the training set               | 0.004                  |
|                   | Mouse and human experiments in the test set                   | 0.210                  |
|                   | Mouse experiments in the training and test sets               | $7.19 \times 10^{-14}$ |
|                   | Human experiments in the training and test sets               | 0.002                  |
| Specific response | Mouse and human experiments in the training set               | 0.019                  |
|                   | Mouse and human experiments in the test set                   | $6.64 \times 10^{-4}$  |
|                   | Mouse experiments in the training and test sets               | 0.711                  |
|                   | Human experiments in the training and test sets               | 0.035                  |
